# Supplementary material for: Provision of medical assistance in dying: a scoping review
Source: PubMed Central journal article supplement — BMJ Open. 2020 Jul 8;10(7):e036054. doi: 10.1136/bmjopen-2019-036054 (PMC7348461; doi:10.1136/bmjopen-2019-036054), 2020-07-08
Supplement: bmjopen-2019-036054.draft_revisions.pdf [file bmjopen-2019-036054.draft_revisions.pdf]

# BMJ Open

BMJ Open is committed to open peer review. As part of this commitment we make the peer review history of every article we publish publicly available.

When an article is published we post the peer reviewers' comments and the authors' responses online. We also post the versions of the paper that were used during peer review. These are the versions that the peer review comments apply to.

The versions of the paper that follow are the versions that were submitted during the peer review process. They are not the versions of record or the final published versions. They should not be cited or distributed as the published version of this manuscript.

BMJ Open is an open access journal and the full, final, typeset and author-corrected version of record of the manuscript is available on our site with no access controls, subscription charges or pay-per-view fees (<http://bmjopen.bmj.com>).

If you have any questions on BMJ Open's open peer review process please email [info.bmjopen@bmj.com](mailto:info.bmjopen@bmj.com)

# BMJ Open

## The provision of medical assistance in dying: a scoping review

|                               |                                                                                                                                                                                                                                                                                                                                                                                                                                                                                                                                                                                                                                                                                                                                                                                                        |
|-------------------------------|--------------------------------------------------------------------------------------------------------------------------------------------------------------------------------------------------------------------------------------------------------------------------------------------------------------------------------------------------------------------------------------------------------------------------------------------------------------------------------------------------------------------------------------------------------------------------------------------------------------------------------------------------------------------------------------------------------------------------------------------------------------------------------------------------------|
| Journal:                      | <i>BMJ Open</i>                                                                                                                                                                                                                                                                                                                                                                                                                                                                                                                                                                                                                                                                                                                                                                                        |
| Manuscript ID                 | bmjopen-2019-036054                                                                                                                                                                                                                                                                                                                                                                                                                                                                                                                                                                                                                                                                                                                                                                                    |
| Article Type:                 | Original research                                                                                                                                                                                                                                                                                                                                                                                                                                                                                                                                                                                                                                                                                                                                                                                      |
| Date Submitted by the Author: | 11-Dec-2019                                                                                                                                                                                                                                                                                                                                                                                                                                                                                                                                                                                                                                                                                                                                                                                            |
| Complete List of Authors:     | Zworth, Max; McMaster University Michael G DeGroot School of Medicine,<br>Saleh, Carol; McMaster University, Medicine; 1989<br>Ball, Ian; Western University, Division of Critical Care Medicine<br>Kalles, Gaelen; Hamilton Health Sciences<br>Chkaroubo, Anatoli; Hamilton Health Sciences<br>Kekewich, Mike; Ottawa Hospital, Clinical and Organizational Ethics<br>Miller, Paul; Hamilton Health Sciences, Emergency Medicine; McMaster University, Medicine (Emergency Medicine)<br>Dees, Marianne; Radboudumc, Department for Primary and Community Care<br>Frolic, Andrea; Hamilton Health Sciences, Clinical and Organizational Ethics<br>Oczkowski, Simon; McMaster University, Medicine (Critical Care); McMaster University, 8. Department of Health Research Methods, Evidence, and Impact |
| Keywords:                     | PALLIATIVE CARE, Adult intensive & critical care < INTENSIVE & CRITICAL CARE, Protocols & guidelines < HEALTH SERVICES ADMINISTRATION & MANAGEMENT, MEDICAL ETHICS                                                                                                                                                                                                                                                                                                                                                                                                                                                                                                                                                                                                                                     |
|                               |                                                                                                                                                                                                                                                                                                                                                                                                                                                                                                                                                                                                                                                                                                                                                                                                        |

SCHOLARONE™  
Manuscripts

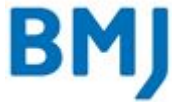

I, the Submitting Author has the right to grant and does grant on behalf of all authors of the Work (as defined in the below author licence), an exclusive licence and/or a non-exclusive licence for contributions from authors who are: i) UK Crown employees; ii) where BMJ has agreed a CC-BY licence shall apply, and/or iii) in accordance with the terms applicable for US Federal Government officers or employees acting as part of their official duties; on a worldwide, perpetual, irrevocable, royalty-free basis to BMJ Publishing Group Ltd ("BMJ") its licensees and where the relevant Journal is co-owned by BMJ to the co-owners of the Journal, to publish the Work in this journal and any other BMJ products and to exploit all rights, as set out in our [licence](#).

The Submitting Author accepts and understands that any supply made under these terms is made by BMJ to the Submitting Author unless you are acting as an employee on behalf of your employer or a postgraduate student of an affiliated institution which is paying any applicable article publishing charge ("APC") for Open Access articles. Where the Submitting Author wishes to make the Work available on an Open Access basis (and intends to pay the relevant APC), the terms of reuse of such Open Access shall be governed by a Creative Commons licence – details of these licences and which [Creative Commons](#) licence will apply to this Work are set out in our licence referred to above.

Other than as permitted in any relevant BMJ Author's Self Archiving Policies, I confirm this Work has not been accepted for publication elsewhere, is not being considered for publication elsewhere and does not duplicate material already published. I confirm all authors consent to publication of this Work and authorise the granting of this licence.

## The provision of medical assistance in dying: a scoping review

Max Zworth<sup>1</sup>, Carol Saleh<sup>2</sup>, Ian Ball MD<sup>3</sup>, Gaelen Kalles RN<sup>4</sup>, Anatoli Chkaroubo<sup>4</sup>, Mike Kekewich<sup>5</sup>, Paul Miller<sup>4,6</sup>, Marianne Dees<sup>7</sup>, Andrea Frolic<sup>4</sup>, Simon J W Oczkowski MD<sup>2,4,8</sup>

### Author affiliations

1. Michael G. DeGroot School of Medicine, McMaster University, Hamilton, Canada
2. Department of Medicine, McMaster University, Hamilton, Canada
3. Division of Critical Care Medicine, Western University, London, Canada
4. Hamilton Health Sciences, Hamilton, Canada
5. Department of Clinical and Organizational Ethics, The Ottawa Hospital, Ottawa, Canada
6. Division of Emergency Medicine, Department of Medicine, McMaster University, Hamilton, Canada
7. Department for Primary and Community Care, Radboud University Medical Center, Nijmegen, The Netherlands
8. Department of Health Research Methods, Evidence, and Impact, McMaster University, Hamilton, Canada

### **Corresponding author:**

Max Zworth  
Michael G. DeGroot School of Medicine, McMaster University  
1280 Main Street West  
Hamilton, ON, Canada, L8S 4L8  
[max.zworth@medportal.ca](mailto:max.zworth@medportal.ca)

### **Funding**

This research is supported by a Hamilton Academic Health Sciences Organization's innovation fund. Dr. Oczkowski is supported by an internal career award from the Department of Medicine at McMaster University. Max Zworth is supported by the McMaster Medical Student Research Excellence Scholarship (MAC RES).

**Tables: 4**

**Figures: 3**

**Word count: 2774**

**Abstract (maximum 300 words)**

**Objectives:** The purpose of this study is to map the characteristics of the existing medical literature describing the medications, settings, participants and outcomes of medical assistance in dying (MAID), in order to identify knowledge gaps and areas for future research.

**Design:** Scoping review

**Search strategy:** We searched electronic databases (MEDLINE, EmBASE, PsychINFO, CINAHL, CENTRAL), clinical trial registries, conference abstracts, and professional guidelines from jurisdictions where MAID is legal, up to June 2017. Eligible report types included technical summaries, institutional policies, practice surveys, practice guidelines and clinical studies that describe MAID provision in adults who have provided informed consent for MAID.

**Results:** 147 articles published between 1989 to 2017 met eligibility criteria. 72 studies described details for MAID administered by IV medications, and 46 studies provided data on oral medications. In IV protocols, MAID was most commonly administered using a barbiturate (32/147) or propofol (20/147) followed by a neuromuscular blocker. Oral protocols most often used barbiturates alone (36/147) or in conjunction with a neuromuscular blocker (13/147), and often recommended using a prokinetic agent prior to lethal drug ingestion. Complications included prolonged duration of the dying process, difficulty obtaining IV access, and difficulty swallowing oral agents. Most commonly, the role of physicians was prescribing (71/147) and administering medications (78/147). Nurses roles included administering medications (17/147) and supporting the patient (14/147) or family (13/147). The role of families involved providing support to the patient (15/147) and bringing medications from pharmacy for self-administration (4/147).

**Conclusions:** We identified several trends in MAID provision including common medications and doses for oral and parenteral administration, roles of healthcare professionals and families, and complications that may cause patient, family and provider distress. Future research should aim to identify the medications, dosages, and administration techniques and procedures which produce the most predictable outcomes and mitigate distress for those involved.

**Key words:** assisted dying, euthanasia, assisted suicide, physician assisted dying, scoping review

## Article Summary:

### Strengths and limitations of this study:

- We conducted a scoping review of MAID provision using very broad and inclusive search strategy and a pre-published protocol
- Screening was performed in duplicate by two investigators at both the title/abstract and full-text level
- We describe a wide variety of methods for providing MAID, though few reports described the number of times the protocol has been used
- The reports we found did not generally link data between medications, locations, providers, and outcomes, making it difficult to determine which medications or combinations of medications are most effective and result in the fewest complications
- Our study is limited by its emphasis on Canadian practice, which is likely due both to most authors being Canadian, and the more standardized approaches to MAID provision in European countries compared to North America

## Introduction

In 2016, the Canadian government passed Bill C-14, which decriminalized medical assistance in dying (MAID) for capable patients with intolerable suffering for whom death was 'reasonably foreseeable.'<sup>(1)</sup> As of October 2018 there have been over 6749 medically assisted deaths in Canada, and MAID accounted for approximately 1.12% of all deaths in Canada in the first 10 months of 2018.<sup>(2)</sup> Bill C-14 legislated eligibility criteria under which patients could receive MAID, but provided no guidance on the clinical aspects of providing aid in dying. Critical clinical issues remain unaddressed, such as which pharmaceuticals, doses, and routes of administration should be used to cause death; the roles, scope of practice, and training requirements for health care professionals; the optimal locations for MAID (community, institutional settings, or in dedicated centers); and ways to support patients and their families around the time of an assisted death. Thus, Canadian health care providers and organizations had to rapidly develop policies and practices for the assessment and provision of MAID in anticipation of this legislative change. Some provinces (such as Alberta and Manitoba) have

1  
2  
3 developed highly centralized care coordination services, while others (such as Ontario) have  
4 adopted a hands-off approach, allowing individual clinicians and health care organizations to  
5 develop local policies and protocols for MAID. As a result, there is significant variation in how  
6 MAID is practiced across Canada.  
7  
8  
9

10 This is worrisome, as data from other countries suggests that clinical problems with  
11 MAID care are common, including poor communication between health care providers and  
12 patients, inconsistent application of eligibility criteria, unequal access, and technical problems  
13 with medication administration.(3-7) Though new federal reporting requirements for MAID  
14 took effect in 2018, the collected data is descriptive, and not intended to evaluate the quality or  
15 consistency of MAID provision.(8) While an abundance of literature has emerged in recent  
16 years discussing ethical questions around MAID and the experiences of those involved in the  
17 MAID process, there is relatively sparse literature addressing the medical aspects of providing  
18 aid in dying. Thus, we conducted a scoping review on MAID provision in all jurisdictions where  
19 medically assisted dying is practiced, with two primary objectives:  
20  
21  
22  
23  
24  
25  
26  
27  
28

- 29 1. To describe the range and scope of the existing medical literature on the provision of  
30 MAID  
31
- 32 2. To summarize reports of the technical aspects of MAID provision, including  
33 pharmaceuticals and procedures; location of provision; the role and scope of involved  
34 healthcare professionals; role of patients' families; and descriptions of adverse events.  
35  
36  
37  
38  
39

## 40 **Methods**

### 41 Protocol and registration

42 The methods of this scoping review are based on those described in the Joanna Briggs Institute  
43 Reviewers Manual (9) and are described in detail in a previously published study protocol (10).  
44  
45  
46  
47  
48

### 49 Eligibility criteria

50 Eligible sources included technical reports, institutional policies, practice surveys, clinical  
51 practice guidelines and clinical studies. Opinion pieces/letters were excluded, as were reports  
52 solely describing the assessment of patient eligibility for MAID. No restrictions were imposed  
53  
54  
55  
56  
57  
58  
59  
60

1  
2  
3 based on methodological quality, study location, language or publication date. We included  
4 reports referring to adult (age > 18 years) patients who provided informed consent for MAID in  
5 the form of either assisted suicide (self-administered lethal medications) or voluntary  
6 euthanasia (lethal medications administered by another person). We included reports  
7 describing the provision of MAID using any medication delivery method, in institutions and  
8 residences, which involved a healthcare professional such as a physician, nurse, or pharmacist.  
9 We excluded reports describing other end-of-life practices, including withholding or  
10 withdrawing life-sustaining treatment; palliative sedation or unintentional hastening of death  
11 via medications for symptom management, unless such reports also included separate  
12 descriptions of MAID. Studies in which patients received euthanasia without having provided  
13 informed consent (eg. capital punishment) were excluded (Table 1).  
14  
15  
16  
17  
18  
19  
20  
21  
22  
23  
24

### 25 Information Sources and Searches

26 Briefly, we conducted systematic searches of multiple online databases, including MEDLINE,  
27 EMBASE, CINAHL, CENTRAL and PsycINFO from database inception to June 2017 for the concept  
28 of MAID ('[medical] aid [assistance] in dying', 'euthanasia', 'assisted suicide', '[physician]  
29 assisted dying', '[physician] assisted death', 'end of life choice') and the concept of medication  
30 administration ('practice patterns', 'drug administration', 'medication management', 'drug  
31 utilization', 'drug therapy'). Complete search details are available online (10). We also  
32 conducted extensive grey literature searches, including clinical trial databases, conference  
33 abstracts from palliative care conferences, technical reports of MAID protocols and institutional  
34 policies for MAID until June 2018. Finally, we contacted professional groups and government  
35 agencies that monitor and regulate healthcare to obtain protocols and reports describing the  
36 provision of MAID.  
37  
38  
39  
40  
41  
42  
43  
44  
45  
46  
47  
48

### 49 Selection of sources of evidence

50 Report eligibility was determined first by title and abstract screening, and second by full-text  
51 screening. After pilot-testing the screening and eligibility forms on the first 100 abstracts and 10  
52 full-text papers, two investigators (CS, SJO) independently reviewed each report's eligibility for  
53  
54  
55  
56  
57  
58  
59  
60



1  
2  
3 inclusion in the review. During the course of the review, no changes were made to the inclusion  
4 or exclusion criteria.  
5  
6  
7

### 8 Data charting process

9  
10 We conducted calibration exercises on the first 5 eligible studies to pilot-test the extraction  
11 form and ensure consistent data collection. Two investigators (MZ, CS) then independently  
12 extracted data using structured forms divided into three major concepts: report characteristics,  
13 methods of MAID provision, and MAID outcomes (see supplementary information). The final  
14 set of data items used for extraction is presented in Table 2. The data collection form was not  
15 modified throughout the extraction process. As our study's objectives were descriptive, we did  
16 not conduct a critical appraisal of the individual studies we retrieved.  
17  
18  
19  
20  
21  
22  
23  
24

### 25 Synthesis of results

26  
27 Data were organized according to the three major concepts listed above (report characteristics;  
28 MAID provision; and MAID outcomes). Univariate descriptive statistics were computed for  
29 report characteristics, including year of publication, report type and report purpose, in order to  
30 provide an overview of the scope and content of the existing literature on MAID. Descriptive  
31 statistics (frequency, proportion of studies) were also calculated for categorical data regarding  
32 MAID provision, including medications and dosages used in IV and oral protocols, order of  
33 medication administration, and MAID locations. Non-categorical information about MAID  
34 provision such as the roles ascribed to various health professionals and safety checks was  
35 compiled into a list format, and a team of three investigators extracted common themes by  
36 consensus. Similarly, data regarding MAID outcomes and complications was summarized by  
37 identifying keywords (eg. "IV access" or "time to death"), and from there descriptive statistics  
38 were generated regarding the frequency with which various complications were identified in  
39 the literature.  
40  
41  
42  
43  
44  
45  
46  
47  
48  
49  
50  
51

## 52 **Results**

### 53 Selection of sources of evidence

54  
55  
56  
57  
58  
59  
60

1  
2  
3 The initial online database search identified 10650 potential reports, and 22 additional reports  
4 were identified through the grey literature search (Figure 1). After removing duplicate items,  
5 10672 abstracts were screened, 565 of which met initial eligibility criteria and were assessed  
6 through full-text screening. Among these, articles were removed if they were of an ineligible  
7 reference type, reported on an ineligible population, only addressed MAID eligibility rather than  
8 provision, could not be successfully accessed, or were one of multiple reports on the same  
9 data. After applying these exclusion criteria, 147 articles were included in the review (see  
10 supplemental file).  
11  
12  
13  
14  
15  
16  
17  
18  
19

### 20 Characteristics of sources of evidence

21 The identified reports were published between 1992 and 2018, with the greatest number  
22 published in 2010 (n=14) and 2016 (n=15), and 50% of reports published in 2009 or later.  
23 Report types included non-systematic reviews (including policy and legal reviews) (n=47), cross-  
24 sectional surveys (n=32), MAID medication protocols (n=19), cohort studies (n=16), cross-  
25 sectional studies, including death certificate studies (n=14), qualitative studies (n=10), clinical  
26 practice guidelines/best practices (n=6), systematic reviews (n=2). Reports described MAID  
27 provision in The Netherlands (n=44), United States (n=37), Belgium (n=27), Canada (n=18),  
28 Switzerland (n=7), or multiple regions (n=12). For a complete list of sources of evidence, and  
29 the data charted from each, see attached supplementary file.  
30  
31  
32  
33  
34  
35  
36  
37  
38  
39

### 40 Synthesis of results

#### 41 *Medications*

42 Close to half of the reports provided details for MAID administered by IV medications (72/147).  
43 A sample protocol for MAID administration by IV medication is presented in Figure 2 and the  
44 frequencies and doses encountered for IV medications are shown in Table 3. The use of a  
45 general anaesthetic in combination with a neuromuscular blocker (NMB) was described in 57%  
46 of these studies (41/72). The general anaesthetic mentioned was most commonly a barbiturate  
47 (44%) or propofol (22%), with 26% of studies referring to pentobarbital and 24% referring to  
48 thiopental. Neuromuscular blocking agents most commonly used were cisatracurium (36%),  
49  
50  
51  
52  
53  
54  
55  
56  
57  
58  
59  
60

1  
2  
3 rocuronium (22%), and pancuronium (13%). Of reports discussing IV protocols, 35% referred to  
4 the use of an anxiolytic prior to medication administration. Of these 98% referred to  
5 benzodiazepines, with midazolam used in 56% of cases, and 29% not specifying the type of  
6 benzodiazepine. Only two directly cardio-toxic agents were reported, bupivacane (2/72) and  
7 potassium chloride (2/72)  
8  
9  
10  
11  
12  
13

14 Oral MAID regimes were detailed in 46/147 reports. A sample protocol for oral administration is  
15 presented in Figure 3, and the frequencies and doses for oral medications are presented in  
16 Table 4. Barbituate medications are mentioned in 94% of oral protocols (43/46). The life-ending  
17 drug was a barbituate alone in 77% (36/46) of oral regime studies, though barbiturates were  
18 also occasionally used with an opioid medication (17%, 6/36) or an alcohol (8%, 3/36).  
19 Pentobarbital and secobarbital were the oral barbiturates most commonly mentioned, each  
20 referred to in 36% (17/46) of studies. Additionally, barbituates were mentioned without specific  
21 medications or doses in 36% (17/46) of reports. A single report described a combination of  
22 propranolol, digoxin, and diazepam. To avoid vomiting, antiemetics, most commonly  
23 metoclopramide (7/46) or ondansetron (5/46)) were given prior to administration of life-ending  
24 drugs was included in 39% of oral reports (18/46). Anxiolytic medication such as midazolam or  
25 lorazepam appear in 11% (5/46) of studies. An “as-needed” IV neuromuscular blocker was  
26 described as a backup in case of failure of oral medications in 28% (13/46) of reports. A single  
27 report described the use of helium gas to induce unconsciousness and death.  
28  
29  
30  
31  
32  
33  
34  
35  
36  
37  
38  
39  
40  
41

#### 42 *Locations where assisted dying takes place*

43 55/147 articles described the setting for MAID administration. The two most common locations  
44 for MAID provision were in hospital (35/55) and at the patient’s home (36/55). Other settings  
45 include nursing home (9/55), hospice (5/55) and other settings (7/55), including locations such  
46 as the headquarters of the non-governmental organization Dignitas in Switzerland.  
47  
48  
49  
50  
51

#### 52 *The role of health professionals in assisted dying*

53  
54  
55  
56  
57  
58  
59  
60

1  
2  
3 The three health professions whose roles in MAID provision were most often described  
4 were physicians (101/147), nurses (33/147) and pharmacists (32/147). Common roles described  
5 for physicians included prescribing (78/101) and administering (71/101) medications, being  
6 present at death (22/101) and pronouncing death (11/101). The role of nurses was most often  
7 to administer medication (17/33), support the patient (14/33), prepare the route of  
8 administration (12/33) and prepare medications (6/33). Pharmacists' involvement was mainly  
9 to dispense medication (31/32), and also included educating patients regarding the dispensed  
10 drugs (11/32) and securing unused drugs (6/32). Certain studies also discussed the involvement  
11 of other individuals, such as NGO volunteers (Switzerland), other allied health such as child life  
12 specialists, designated MAID coordinators and palliative care consultants. Finally, the role of  
13 family members was occasionally described (19 studies), and included supporting the patient  
14 (15/19), retrieving medications (4/19) and administering oral life-ending medications (2/19).  
15  
16  
17  
18  
19  
20  
21  
22  
23  
24  
25  
26

### 27 *Outcomes and complications of assisted dying*

28 Of the 147 reports found, 21 described outcomes and complications in MAID provision. For IV  
29 administration, complications included difficulty obtaining or maintaining IV access (3/21), the  
30 patient dying too slowly or not dying (6/21), patient dying too quickly (3/21), difficulty pushing  
31 a large syringe, pain on injection, need for backup kit, and inappropriate drugs given (1/21  
32 each). For oral administration, complications included prolonged duration of the dying process  
33 (7/21), vomiting (6/21), myoclonus/seizures (2/21), poor taste of the cocktail, and the need for  
34 IV backup (1/21).  
35  
36  
37  
38  
39  
40  
41  
42  
43

## 44 **Discussion**

### 45 *Summary of evidence*

46 We found 147 published and unpublished reports describing the provision of medical  
47 assistance in dying which varied greatly in geographic origin, report type, and items reported.  
48 The content of the reports was correspondingly diverse, with a wide variety of medications  
49 used for both intravenous and oral routes. Intravenous drugs were usually given in a sequence,  
50 with an anxiolytic (most commonly midazolam), followed by a sedative/anesthetic (with or  
51  
52  
53  
54  
55  
56  
57  
58  
59  
60

1  
2  
3 without an opioid) followed by a neuromuscular blocker. Direct cardiotoxic medications (eg.  
4 potassium, bupivacane) were used infrequently, despite the fact that these would be expected  
5 to result in a rapid, painless death very shortly after injection. There are several possible  
6 reasons for this. Firstly, providers may be unfamiliar with and thus reluctant to use these  
7 agents, as outside of MAID, clinicians rarely administer drugs which are designed to stop a  
8 patient's heart. Secondly, anticipated discomfort of providers and families with immediate  
9 death— "death happened too quickly" was described as a complication in three reports,  
10 indicating that even with a planned rapid assisted death, people still expect there to be a  
11 "process" of dying after medications are administered. Thirdly, it may be that MAID providers  
12 are uncomfortable with the directness of injecting a medication and stopping the patient's  
13 heart. Administering a neuromuscular blocker and waiting for a patient to die of CO2 narcosis  
14 or hypoxia maintains some element of "indirectness" to the patient's death. Finally, these  
15 medications may be avoided simply because it is not required to directly stop the heart in the  
16 presence of deep sedation and anoxia— thus cardiotoxic agents are seen as unnecessary.  
17  
18  
19  
20  
21  
22  
23  
24  
25  
26  
27  
28

29 The reports we found did not generally link data between medications, locations,  
30 providers, and outcomes. As a result it is not possible to determine which medications or  
31 combinations of medications are most effective and result in the fewest complications and least  
32 distress for patients, providers, and families. However, for providers and health care  
33 organizations which provide assisted dying, our scoping review does provide an overview of  
34 what the most commonly described practices are, worldwide. There is a need for future  
35 research in this area, including understanding patient and family perspectives of what makes a  
36 "good" assisted death; descriptions of which complications are most burdensome to patients,  
37 families, and providers; consistent definitions and outcome reporting practices of MAID  
38 provision; and comprehensive, prospective data collection of clinical practice. Taken together,  
39 this information would allow comparative research between different approaches to MAID, and  
40 allow clinical researchers to identify the medications, dosages, and administration techniques  
41 and procedures which are cost effective, simple to administer and mitigate distress for those  
42 involved.  
43  
44  
45  
46  
47  
48  
49  
50  
51  
52  
53  
54  
55  
56  
57  
58  
59  
60

### *Strengths*

Strengths of our scoping review included its very broad and inclusive search strategy, screening in duplicate by two investigators at both the title/abstract and full-text level. As well, we used a pre-published protocol which allowed for a peer review and input prior to study completion, and to ensure that our very broad review accomplished and reported its stated objectives and outcomes.

### *Limitations*

While we described a wide variety of methods for providing MAID, few reports described the number of times the protocol has been used. Similarly, there are likely to be differences between what is written in a protocol and what is actually done in practice. It also does not capture practices which are not formally recorded, either as a publication, or as a policy or procedure. As a result, our review cannot provide insight into which approaches to providing aid in dying are most commonly used but only those which are most commonly described in written form. As well, policies and protocols from older reports may have changed since their first publication in the medical literature.

Our study is also limited by its emphasis on Canadian practice. As most of this review's authors are Canadian, we were able to gather a larger number of policies and protocols from Canada, despite vigorous attempts to obtain them from other jurisdictions. The comparatively small number of protocols from other countries may be related to the development of regional standardized approaches to MAID provision (eg. the national Dutch Protocol) resulting in a smaller total number of policies and protocols, and due to a paucity of English-language protocols and policies. Of note, the Canadian policies and protocols are more recent than those in other countries (eg. The Netherlands, Belgium, Luxembourg, and USA), generally dating back to the passage of Bill C-14 in June 2016. Canadian policy and practice is likely to undergo further changes as more experience with MAID is accrued, potentially limiting our report's validity as a description of current practice. Reassuringly, we have informally reviewed a sample of more recent Canadian MAID protocols and found there to be little difference. Data from the Fourth

1  
2  
3 Interim Report on MAID suggests that to date, the vast majority of assisted deaths in Canada  
4 continue to use the intravenous route<sup>2</sup>.  
5  
6  
7

### 8 *Conclusions*

9  
10 We described the published and unpublished literature on MAID provision including common  
11 medications and doses, roles of healthcare professionals and families, and complications that  
12 may cause distress. Future research should aim to identify the medications, dosages, and  
13 administration techniques and procedures, which produce the most predictable outcomes and  
14 mitigate distress for those involved.  
15  
16  
17  
18  
19  
20

### 21 **Disclosures and Acknowledgements**

22  
23 This research is supported by a Hamilton Academic Health Sciences Organization's innovation  
24 fund. Dr. Oczkowski is supported by an internal career award from the Department of Medicine  
25 at McMaster University. Max Zworth is supported by the McMaster Medical Student Research  
26 Excellence Scholarship (MAC RES). Thank you to the numerous MAID providers and health care  
27 organizations which provided us access to their policies and protocols. Thank you to Laura  
28 Banfield, who provided assistance with the electronic search strategies.  
29  
30  
31  
32  
33  
34  
35

### 36 **Patient and Public Involvement**

37  
38 This research was done without patient involvement. Patients were not invited to comment on  
39 the study design and were not consulted to develop patient relevant outcomes or interpret the  
40 results. Patients were not invited to contribute to the writing or editing of this document for  
41 readability or accuracy.  
42  
43  
44  
45

### 46 **Author Contributions**

- 47 • Max Zworth assisted with data acquisition and interpretation, manuscript drafting and  
48 revision.
- 49 • Carol Saleh assisted with conception of the study, data acquisition, and revision  
50 Ian Ball assisted with study conception, design and manuscript revision.
- 51 • Gaelen Kalles assisted with study conception, design and manuscript revision.
- 52 • Anatoli Chkaroubo assisted with study conception, design and manuscript revision.
- 53 • Mike Kekewich assisted with study conception, design and manuscript revision.
- 54  
55  
56  
57  
58  
59  
60

- Paul Miller assisted with study conception, design and manuscript revision.
- Marianne Dees assisted with study conception, design and manuscript revision.
- Andrea Frolic assisted with study conception, design and manuscript revision.
- Simon J W Oczkowski assisted with study conception, design, data acquisition, drafting and revision.

## References

1. First Session of the Parliament of Canada. *Bill C-14: an Act to amend the Criminal Code and to make related amendments to other acts (medical assistance in dying)*. (2016).
2. Health Canada. *Fourth Interim Report on Medical Assistance in Dying in Canada*. (2019).
3. Hendin, H., Rutenfrans, C. & Zylicz, Z. Physician-Assisted Suicide and Euthanasia in the Netherlands: Lessons From the Dutch. *JAMA* **277**, 1720–1722 (1997).
4. Groenewoud, J. H. *et al*. Clinical problems with the performance of euthanasia and physician-assisted suicide in The Netherlands. *N. Engl. J. Med.* **342**, 551–556 (2000).
5. Chin AE, Hedberg K, Higginson GK, F. D. Legalized Physician-Assisted Suicide in Oregon — The First Year’s Experience. *N. Engl. J. Med.* **340**, 83 (1999).
6. Sullivan, A. D., Hedberg, K. & Fleming, D. W. Legalized Physician-Assisted Suicide in Oregon — The Second Year. *N. Engl. J. Med.* **342**, 598–604 (2000).
7. Ganzini, L. *et al*. Physicians’ Experiences with the Oregon Death with Dignity Act. *N. Engl. J. Med.* **342**, 557–563 (2000).
8. Government of Canada. Regulations for the Monitoring of Medical Assistance in Dying: SOR/2018-166. *Canada Gazette, Part II* 152(16) (2018).
9. Joanna Briggs Institute. The Joanna Briggs institute reviewers’ manual 2015: Methodology for JBI scoping reviews. *Aust. Joanna Briggs Inst.* (2015).
10. Oczkowski, S. J. W. *et al*. The provision of medical assistance in dying: protocol for a scoping review. *BMJ Open* **7**, e017888 (2017).



1  
2  
3 **Tables**  
4

5 Table 1: Inclusion and exclusion criteria  
6

|                               | <b>Inclusion Criteria</b>                                                                                                                                         | <b>Exclusion Criteria</b>                                                                                                                                                                                                                                                                                      |
|-------------------------------|-------------------------------------------------------------------------------------------------------------------------------------------------------------------|----------------------------------------------------------------------------------------------------------------------------------------------------------------------------------------------------------------------------------------------------------------------------------------------------------------|
| <b>Types of sources</b>       | Technical report<br>Institutional policy<br>Practice survey<br>Clinical practice guideline/recommendation<br>Case report<br>Observational study<br>Clinical trial | Opinion piece/letter                                                                                                                                                                                                                                                                                           |
| <b>Types of patients</b>      | Adults (age>18 years)<br>Provided informed consent for MAID (assisted suicide or voluntary euthanasia), for any reason                                            | Patients receiving involuntary euthanasia (capital punishment)                                                                                                                                                                                                                                                 |
| <b>Types of interventions</b> | Provision of assisted suicide or voluntary euthanasia with involvement of a healthcare professional (physician, nurse, pharmacist, etc.)                          | Assisted suicide or euthanasia without involvement of a health professional<br>Description of assessment/eligibility for MAID alone<br>Description of ethics or acceptability of MAID<br>Non-MAID end-of-life practices, including withdrawing/withholding treatments; palliative sedation; or palliative care |

1  
2  
3  
4  
5  
6  
7  
8  
9  
10  
11  
12  
13  
14  
15  
16  
17  
18  
19  
20  
21  
22  
23  
24  
25  
26  
27  
28  
29  
30  
31  
32  
33  
34  
35  
36  
37  
38  
39  
40  
41  
42  
43  
44  
45  
46  
47  
48  
49  
50  
51  
52  
53  
54  
55  
56  
57  
58  
59  
60

For peer review only

Table 2: Data items

| <b>Report characteristics</b>        | <b>Description</b>                                                                                                                                                                                                                                                                 |
|--------------------------------------|------------------------------------------------------------------------------------------------------------------------------------------------------------------------------------------------------------------------------------------------------------------------------------|
| Type of study                        | Technical report, practice survey, clinical practice guideline, observational study, clinical trial, other (describe)                                                                                                                                                              |
| Journal / Publication location       |                                                                                                                                                                                                                                                                                    |
| Author, year                         | Profession and/or specialization                                                                                                                                                                                                                                                   |
| Origin of report                     | Jurisdiction of report (eg. country, state)                                                                                                                                                                                                                                        |
| Organization                         |                                                                                                                                                                                                                                                                                    |
| Report purpose                       | Stated or inferred                                                                                                                                                                                                                                                                 |
| Report audience                      | Stated or inferred                                                                                                                                                                                                                                                                 |
| <b>MAID provision: medications</b>   | <b>Description</b>                                                                                                                                                                                                                                                                 |
| Pharmaceuticals used – IV protocol   | Each pharmaceutical name, dose, route, frequency, speed of administration, stated or inferred purpose of each medication (eg. anxiolytic, sedation, pain control, antiemetic, paralytic) and frequency of use (optional vs obligatory); alternative medications in case of allergy |
| Pharmaceuticals used – Oral protocol | As above                                                                                                                                                                                                                                                                           |
| Other equipment used                 | If relevant                                                                                                                                                                                                                                                                        |
| Safety checks and documentation      | eg. use of a checklist; confirmation of consent; backup medications available, etc.                                                                                                                                                                                                |
| <b>MAID provision: location</b>      | <b>Description</b>                                                                                                                                                                                                                                                                 |
| Location of MAID provision           | Home, hospital, hospice, other, nursing home, self administration or voluntary euthanasia                                                                                                                                                                                          |
| <b>MAID provision: participants</b>  | <b>Description</b>                                                                                                                                                                                                                                                                 |
| Role of healthcare providers         | Profession, training/expertise, role in assisted dying                                                                                                                                                                                                                             |
| Role of families                     | Training/preparation; follow up care; bereavement care                                                                                                                                                                                                                             |

| Outcomes                                                             | Description                                                                        |
|----------------------------------------------------------------------|------------------------------------------------------------------------------------|
| Complications - technical                                            | eg. intravenous malfunction, need to use a second kit, vomiting, allergic reaction |
| Complications – Patient/family distress                              | eg. patient pain, family agitation/anger during provision                          |
| Complications – Provider distress                                    | eg. anxiety during provision                                                       |
| Scores or measurements to assess quality of care or quality of dying | eg. Quality of Dying and Death Score, reporting on checklist                       |

Table 3: Medication, doses and frequency encountered for MAID provision by IV medication.

| Description                         | Dose range        | Frequency |
|-------------------------------------|-------------------|-----------|
| <i>Benzodiazepines</i>              |                   |           |
| Benzodiazepine not specified        | PRN               | 14        |
| Diazepam                            | 10-120 mg         | 3         |
| Lorazepam                           | 2.5-5 mg PRN      | 2         |
| Midazolam                           | 2-120 mg, PRN     | 27        |
| <i>Other sedatives</i>              |                   |           |
| Propofol                            | 1000-2000 mg, PRN | 19        |
| Pentobarbital                       | 1-15 g            | 7         |
| Thiopental                          | 1-2 g, 20 mg/kg   | 20        |
| Secobarbital                        | 9 g               | 5         |
| Phenobarbital                       | 3000 mg           | 8         |
| Vesparax                            | Not reported      | 1         |
| Chloral hydrate                     | 35-40 mg          | 1         |
| <i>Neuromuscular blockers</i>       |                   |           |
| Neuromuscular blocker not specified | PRN               | 25        |
| Mivacurium                          | Not reported      | 1         |
| Atracurium                          | 50-100 mg         | 2         |
| Alcuronium                          | 45 g              | 1         |
| Pancuronium, PRN                    | 18-20 mg          | 9         |
| Rocuronium                          | 150-300 mg, PRN   | 15        |
| Cisatracurium                       | 30-40 mg          | 7         |
| Vecuronium                          | 10-60 mg          | 6         |

|                           |               |    |
|---------------------------|---------------|----|
| Curare                    | Not reported  | 3  |
| <i>Opioids</i>            |               |    |
| Opioids NOS               | NA            | 19 |
| Morphine                  | 16 - 480 mg   | 3  |
| Fentanyl                  | 25 - 1500 mcg | 2  |
| <i>Cardiotoxic agents</i> |               |    |
| Potassium chloride        | Not reported  | 3  |
| Bupivacaine               | 400 mg        | 2  |
| <i>Local anaesthetics</i> |               |    |
| Lidocaine                 | 40-120 mg     | 19 |
| Magnesium sulphate        | 1000 mg       | 5  |

Table 4: Medication, doses and frequency encountered for MAID provision by oral medication.

| <b>Description</b>           | <b>Dose range</b> | <b>Frequency</b> |
|------------------------------|-------------------|------------------|
| <i>Barbituates</i>           |                   |                  |
| Barbituate not specified     | NA                | 17               |
| Pentobarbital                | 9-15 grams        | 17               |
| Phenobarbital                | 20 grams          | 8                |
| Secobarbital                 | 9-15 grams        | 17               |
| Brallobarbitalum             | Not reported      | 1                |
| Sodium thiopental            | Not reported      | 1                |
| <i>Benzodiazepines</i>       |                   |                  |
| Benzodiazepine not specified | NA                | 6                |
| Diazepam                     | 1 g               | 1                |
| Lorazepam                    | 0.25-2 mg PRN, IV | 3                |

|                                                  |                  |    |
|--------------------------------------------------|------------------|----|
| Midazolam                                        | 10 mg, PRN, IV   | 2  |
| <i>Anti-emetics</i>                              |                  |    |
| Anti-emetic not specified                        | NA               | 8  |
| Metoclopramide                                   | 10-20 mg         | 7  |
| Ondansetron                                      | 8 mg             | 5  |
| Haloperidol                                      | 5 mg, PRN        | 2  |
| <i>Miscellaneous sedatives</i>                   |                  |    |
| Chloral hydrate                                  | 20 g             | 3  |
| <i>Cardiotoxic agents</i>                        |                  |    |
| Digoxin                                          | 50 mg            | 1  |
| Propranolol                                      | 2 g              | 1  |
| <i>Opioids</i>                                   |                  |    |
| Morphine                                         | 15 mg- 3g        | 12 |
| Dextropropoxyphene                               | Not reported     | 2  |
| <i>Neuromuscular blocker (for IV backup use)</i> |                  |    |
| Neuromuscular blocker                            | IV, PRN (backup) | 11 |

## Figures

Figure 1: Study selection flow chart (coloured)

Figure 2: Sample protocols for MAID administration by IV medications, including medications and dose ranges encountered in the scoping review

Figure 3: Sample protocols for MAID administration via oral medications, including medications and dose ranges encountered in the scoping review



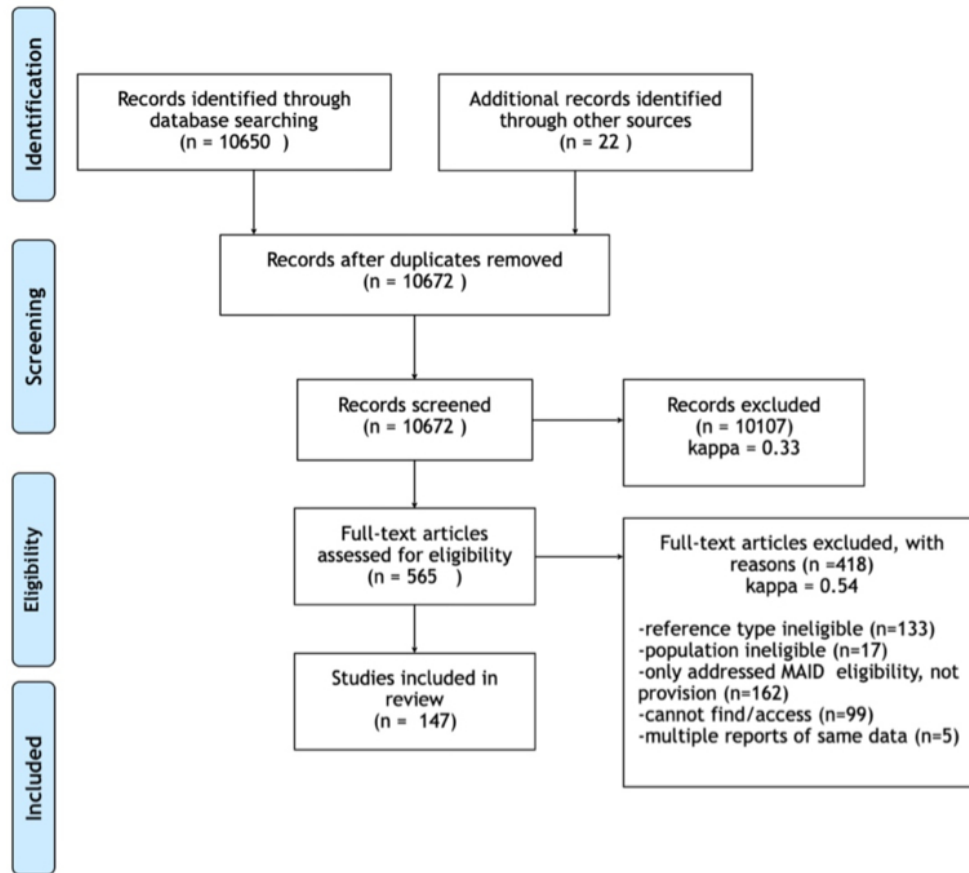

Figure 1: Study selection flow chart

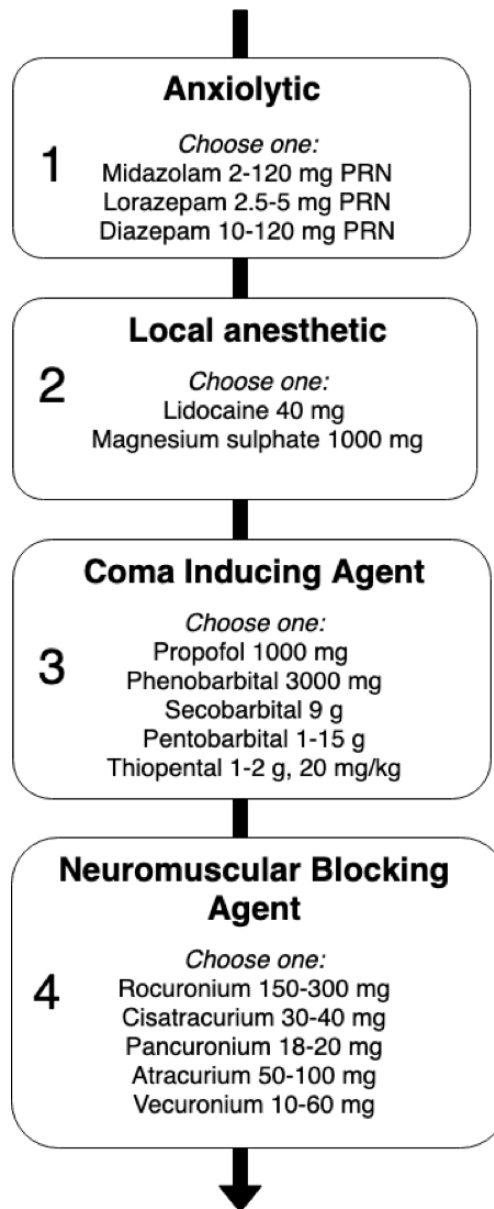

Figure 2: Sample protocols for MAID administration by IV medications, including medications and dose ranges encountered in the scoping review

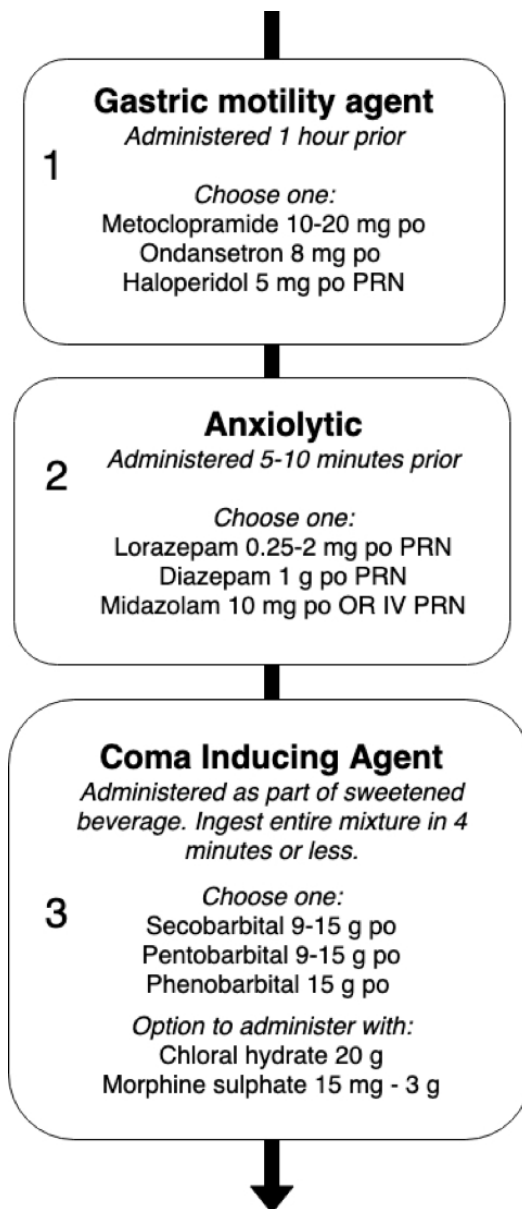

45 Figure 3: Sample protocols for MAID administration via oral medications, including medications and dose  
46 ranges encountered in the scoping review  
47  
48  
49  
50  
51  
52  
53  
54  
55  
56  
57  
58  
59  
60

| <i>Appendix ID</i> | <i>Type of Study/Report Type</i> | <b>Study Characteristics</b>       |                                             |
|--------------------|----------------------------------|------------------------------------|---------------------------------------------|
|                    |                                  | <i>Journal/Publisher</i>           | <i>Author</i>                               |
| 1                  | Position Statement               | Oncology Nursing Forum             | Oncology Nursing Society Board of Directors |
| 2                  | Review                           | Harvard Journal on Legislation     | Baron et al.                                |
| 3                  | Review                           | Annales pharmaceutiques francaises | Boissinot et al.                            |

1  
2  
3  
4  
5  
6  
7  
8  
9  
10  
11  
12  
13  
14  
15  
16  
17  
18  
19  
20  
21  
22  
23  
24  
25  
26  
27  
28  
29  
30  
31  
32  
33  
34  
35  
36  
37  
38  
39  
40  
41  
42  
43  
44  
45  
46  
47  
48  
49  
50  
51  
52  
53  
54  
55  
56  
57  
58  
59  
60

|   |        |                                 |                  |
|---|--------|---------------------------------|------------------|
| 4 | Review | La Presse Médicale              | Burette et al.   |
| 5 | Survey | New England Journal of Medicine | Chambaere et al. |

For peer review only

|                                                                                                                                                                                                                                              |   |              |                                           |                |
|----------------------------------------------------------------------------------------------------------------------------------------------------------------------------------------------------------------------------------------------|---|--------------|-------------------------------------------|----------------|
| 1<br>2<br>3<br>4<br>5<br>6<br>7<br>8<br>9<br>10<br>11<br>12<br>13<br>14<br>15                                                                                                                                                                | 6 | Cohort study | The New England<br>Journal of<br>Medicine | Chin et al.    |
| 16<br>17<br>18<br>19<br>20                                                                                                                                                                                                                   | 7 | Survey       | The New England<br>Journal of<br>Medicine | De Boer et al. |
| 21<br>22<br>23<br>24<br>25<br>26<br>27<br>28<br>29<br>30<br>31<br>32<br>33<br>34<br>35<br>36<br>37<br>38<br>39<br>40<br>41<br>42<br>43<br>44<br>45<br>46<br>47<br>48<br>49<br>50<br>51<br>52<br>53<br>54<br>55<br>56<br>57<br>58<br>59<br>60 | 8 | Case Report  | Transplant<br>International               | Detry et al.   |

1  
2  
3  
4  
5  
6  
7  
8  
9  
10  
11  
12  
13  
14  
15  
16  
17  
18  
19  
20  
21  
22  
23  
24  
25  
26  
27  
28  
29  
30  
31  
32  
33  
34  
35  
36  
37  
38  
39  
40  
41  
42  
43  
44  
45  
46  
47  
48  
49  
50  
51  
52  
53  
54  
55  
56  
57  
58  
59  
60

|    |                   |                                                 |                    |
|----|-------------------|-------------------------------------------------|--------------------|
| 9  | Qualitative study | Journal of Advanced Nursing                     | de Casterle et al. |
| 10 | Review            | American Journal of hospice and palliative care | Enck               |

For peer review only

|                                                                                                                                                                                                                                        |    |                       |                              |                   |
|----------------------------------------------------------------------------------------------------------------------------------------------------------------------------------------------------------------------------------------|----|-----------------------|------------------------------|-------------------|
| 1<br>2<br>3<br>4<br>5<br>6<br>7<br>8<br>9<br>10<br>11<br>12<br>13<br>14<br>15<br>16<br>17<br>18<br>19<br>20<br>21                                                                                                                      | 11 | Qualitative study     | Dutch Journal of<br>Medicine | Groenewoud et al. |
| 22<br>23<br>24<br>25<br>26<br>27<br>28<br>29<br>30<br>31<br>32<br>33<br>34<br>35<br>36<br>37<br>38<br>39<br>40<br>41<br>42<br>43<br>44<br>45<br>46<br>47<br>48<br>49<br>50<br>51<br>52<br>53<br>54<br>55<br>56<br>57<br>58<br>59<br>60 | 12 | Cross-Sectional study | Hospital<br>Pharmacy         | Hopkins & Boss    |



1  
2  
3  
4  
5  
6  
7  
8  
9  
10  
11  
12  
13  
14  
15  
16  
17  
18  
19  
20  
21  
22  
23  
24  
25  
26  
27  
28  
29  
30  
31  
32  
33  
34  
35  
36  
37  
38  
39  
40  
41  
42  
43  
44  
45  
46  
47  
48  
49  
50  
51  
52  
53  
54  
55  
56  
57  
58  
59  
60

|    |        |                                 |               |
|----|--------|---------------------------------|---------------|
| 13 | Review | European Journal of Health Law  | Lewis         |
| 14 | Review | New England Journal of Medicine | Loggers et al |

For peer review only

|                                                                                                                                                                                  |    |        |                                           |                |
|----------------------------------------------------------------------------------------------------------------------------------------------------------------------------------|----|--------|-------------------------------------------|----------------|
| 1<br>2<br>3<br>4<br>5<br>6<br>7<br>8<br>9<br>10<br>11<br>12<br>13<br>14<br>15<br>16<br>17<br>18                                                                                  | 15 | Review | The<br>Pharmaceutical<br>Journal          | Meek           |
| 19<br>20<br>21<br>22<br>23<br>24<br>25<br>26<br>27                                                                                                                               | 16 | Survey | The New England<br>Journal of<br>Medicine | Meier et al.   |
| 28<br>29<br>30                                                                                                                                                                   | 17 | Review | Canadian Public<br>Policy                 | Ogden          |
| 31<br>32<br>33<br>34<br>35<br>36<br>37<br>38<br>39<br>40<br>41<br>42<br>43<br>44<br>45<br>46<br>47<br>48<br>49<br>50<br>51<br>52<br>53<br>54<br>55<br>56<br>57<br>58<br>59<br>60 | 18 | Review | Palliative<br>Medicine                    | Pereira et al. |

1  
2  
3  
4  
5  
6  
7  
8  
9  
10  
11  
12  
13  
14  
15  
16  
17  
18  
19  
20  
21  
22  
23  
24  
25  
26  
27  
28  
29  
30  
31  
32  
33  
34  
35  
36  
37  
38  
39  
40  
41  
42  
43  
44  
45  
46  
47  
48  
49  
50  
51  
52  
53  
54  
55  
56  
57  
58  
59  
60

|    |                       |                                |              |
|----|-----------------------|--------------------------------|--------------|
| 19 | Cross-sectional study | Dutch Journal of Medicine      | Rurup et al. |
| 20 | Cross-sectional study | Journal of Palliative Medicine | Smith et al. |

For peer review only

|    |        |                                      |                        |
|----|--------|--------------------------------------|------------------------|
| 21 | Review | International Nursing Review         | van der Arend          |
| 22 | Survey | Pharmacoepidemiology and Drug Safety | Vander Stichele et al. |
| 23 | Review | Death Studies                        | Werth & Wineberg       |

|                                                                                                                                                 |    |        |                                     |                                            |
|-------------------------------------------------------------------------------------------------------------------------------------------------|----|--------|-------------------------------------|--------------------------------------------|
| 1<br>2<br>3<br>4<br>5<br>6<br>7<br>8<br>9<br>10<br>11<br>12<br>13<br>14<br>15<br>16<br>17<br>18<br>19<br>20<br>21<br>22<br>23<br>24<br>25<br>26 | 24 | Review | Bioethics                           | Netherlands State Commission on Euthanasia |
| 27<br>28<br>29<br>30<br>31<br>32                                                                                                                | 25 | Review | The New England Journal of Medicine | Asch                                       |
| 33<br>34<br>35<br>36<br>37                                                                                                                      | 26 | Review | The New England Journal of Medicine | Benrubi                                    |

|    |              |                                   |                   |
|----|--------------|-----------------------------------|-------------------|
| 27 | Survey       | Journal of<br>Advanced<br>Nursing | Bilsen et al.     |
| 28 | Review       | Swiss Med Wkly                    | Bosshard et al.   |
| 29 | Cohort study | Swiss Med Wkly                    | Bosshard et al.   |
| 30 | Survey       | Social Science &<br>Medicine      | Chabot & Goedhart |

1  
2  
3  
4  
5  
6  
7  
8  
9  
10  
11  
12  
13  
14  
15  
16  
17  
18  
19  
20  
21  
22  
23  
24  
25  
26  
27  
28  
29  
30  
31  
32  
33  
34  
35  
36  
37  
38  
39  
40  
41  
42  
43  
44  
45  
46  
47  
48  
49  
50  
51  
52  
53  
54  
55  
56  
57  
58  
59  
60

|    |                   |                                             |                |
|----|-------------------|---------------------------------------------|----------------|
| 31 | Systematic review | Journal of Medical Ethics                   | De Beer et al. |
| 32 | Survey            | Journal of the American Medical Association | Emanuel et al. |

For peer review only

|                                                                                                                                                                                                       |    |              |                                        |                |
|-------------------------------------------------------------------------------------------------------------------------------------------------------------------------------------------------------|----|--------------|----------------------------------------|----------------|
| 1<br>2<br>3<br>4<br>5<br>6<br>7<br>8<br>9<br>10<br>11<br>12<br>13<br>14<br>15<br>16<br>17<br>18<br>19<br>20<br>21<br>22<br>23<br>24<br>25<br>26<br>27<br>28<br>29<br>30<br>31<br>32<br>33<br>34<br>35 | 33 | Survey       | Journal of pain and symptom management | Ganzini et al. |
| 36<br>37<br>38<br>39<br>40<br>41<br>42<br>43<br>44                                                                                                                                                    | 34 | Review       | Nurse Practitioner                     | Hall           |
| 45<br>46<br>47                                                                                                                                                                                        | 35 | Cohort study | NEJM                                   | Hedberg et al. |
| 48<br>49<br>50<br>51<br>52<br>53<br>54<br>55<br>56<br>57<br>58<br>59<br>60                                                                                                                            | 36 | Cohort study | The New England Journal of Medicine    | Hedberg et al. |



|                                                                                                                            |    |              |                                                           |                     |
|----------------------------------------------------------------------------------------------------------------------------|----|--------------|-----------------------------------------------------------|---------------------|
| 1<br>2<br>3<br>4<br>5<br>6<br>7<br>8<br>9<br>10<br>11<br>12<br>13<br>14<br>15<br>16<br>17                                  | 37 | Survey       | Canadian Medical Association Journal                      | Inghelbrecht et al. |
| 18<br>19<br>20<br>21<br>22<br>23<br>24<br>25<br>26                                                                         | 38 | Cohort study | Abstracts of the 2011 International MASCC/ISOO Symposium. | Lossignol et al.    |
| 27<br>28<br>29<br>30<br>31<br>32<br>33<br>34<br>35                                                                         | 39 | Survey       | Oncology Nursing Forum                                    | Matzo & Emanuel     |
| 36<br>37<br>38<br>39                                                                                                       | 40 | Survey       | Archives of Internal Medicine                             | Meier et al.        |
| 40<br>41<br>42<br>43<br>44<br>45<br>46<br>47<br>48<br>49<br>50<br>51<br>52<br>53<br>54<br>55<br>56<br>57<br>58<br>59<br>60 | 41 | Review       | Pharmacy World & Science                                  | Naafs               |

|                                                                                                                                                                                                 |    |        |                                           |                            |
|-------------------------------------------------------------------------------------------------------------------------------------------------------------------------------------------------|----|--------|-------------------------------------------|----------------------------|
| 1<br>2<br>3<br>4<br>5<br>6<br>7<br>8<br>9<br>10<br>11<br>12<br>13<br>14<br>15<br>16<br>17<br>18<br>19<br>20<br>21<br>22<br>23<br>24<br>25<br>26<br>27<br>28<br>29<br>30<br>31<br>32<br>33<br>34 | 42 | Review | University of Pittsburgh Law Review       | O'Brien et al.             |
| 35<br>36<br>37<br>38<br>39<br>40<br>41<br>42<br>43<br>44<br>45<br>46<br>47<br>48<br>49<br>50<br>51<br>52<br>53<br>54<br>55<br>56                                                                | 43 | Survey | Patient Education and Counseling          | Onwuteaka-Philipsen et al. |
| 57<br>58<br>59<br>60                                                                                                                                                                            | 44 | Survey | Journal of the American Geriatric Society | Onwuteaka-Philipsen et al. |

|    |              |                                                           |                                   |
|----|--------------|-----------------------------------------------------------|-----------------------------------|
| 45 | Survey       | Archives of Family Medicine                               | Onwuteaka-Philipsen et al.        |
| 46 | Cohort study | Public Health                                             | Onwuteaka-Philipsen & van der Wal |
| 47 | Cohort study | Palliative Medicine                                       | Rurup et al.                      |
| 48 | Review       | Seattle University Law Review                             | Spencer                           |
| 49 | Review       | Annals of Medicine                                        | Swarte & Heintz                   |
| 50 | Review       | Best Practice & Research Clinical Obstetrics & Gynecology | Swarte & Heintz                   |

|                                                                                                                                                                                        |    |                   |                                   |                                     |
|----------------------------------------------------------------------------------------------------------------------------------------------------------------------------------------|----|-------------------|-----------------------------------|-------------------------------------|
| 1<br>2<br>3<br>4<br>5<br>6<br>7<br>8<br>9<br>10<br>11<br>12<br>13<br>14<br>15<br>16<br>17<br>18<br>19<br>20<br>21<br>22<br>23<br>24<br>25<br>26<br>27<br>28<br>29                      | 51 | Survey            | Journal of<br>Advanced<br>Nursing | van Bruchem-van de Scheur et<br>al. |
| 30<br>31<br>32<br>33<br>34<br>35<br>36<br>37<br>38<br>39<br>40<br>41<br>42<br>43<br>44<br>45<br>46<br>47<br>48<br>49<br>50<br>51<br>52<br>53<br>54<br>55<br>56<br>57<br>58<br>59<br>60 | 52 | Qualitative study | Nursing Ethics                    | van de Scheur & van der Arend       |

|                                                                                                                                                                                                                      |    |        |                                           |                        |
|----------------------------------------------------------------------------------------------------------------------------------------------------------------------------------------------------------------------|----|--------|-------------------------------------------|------------------------|
| 1<br>2<br>3<br>4<br>5<br>6<br>7<br>8<br>9<br>10<br>11<br>12<br>13<br>14<br>15<br>16<br>17<br>18<br>19<br>20                                                                                                          | 53 | Review | OMEGA                                     | Van Der Kloot Meijburg |
| 21<br>22<br>23<br>24                                                                                                                                                                                                 | 54 | Survey | The New England<br>Journal of<br>Medicine | Van Der Maas et al.    |
| 25<br>26<br>27<br>28<br>29<br>30<br>31<br>32<br>33<br>34<br>35<br>36<br>37<br>38<br>39<br>40<br>41<br>42<br>43<br>44<br>45<br>46<br>47<br>48<br>49<br>50<br>51<br>52<br>53<br>54<br>55<br>56<br>57<br>58<br>59<br>60 | 55 | Survey | Dutch Journal of<br>Medicine              | Van Der Wal et al      |

|                                                                                                                                                                                                                                  |    |        |                                                    |                    |
|----------------------------------------------------------------------------------------------------------------------------------------------------------------------------------------------------------------------------------|----|--------|----------------------------------------------------|--------------------|
| 1<br>2<br>3<br>4<br>5<br>6<br>7<br>8<br>9<br>10<br>11<br>12<br>13<br>14<br>15<br>16<br>17<br>18<br>19<br>20<br>21<br>22                                                                                                          | 56 | Review | Research in Social<br>& Administrative<br>Pharmacy | Varadarajan et al. |
| 23<br>24<br>25<br>26<br>27<br>28<br>29<br>30<br>31<br>32<br>33<br>34<br>35<br>36<br>37<br>38<br>39<br>40<br>41<br>42<br>43<br>44<br>45<br>46<br>47<br>48<br>49<br>50<br>51<br>52<br>53<br>54<br>55<br>56<br>57<br>58<br>59<br>60 | 57 | Review | Drugs & Aging                                      | Willems et al.     |

1  
2  
3  
4  
5  
6  
7  
8  
9  
10  
11  
12  
13  
14  
15  
16  
17  
18  
19  
20  
21  
22  
23  
24  
25  
26  
27  
28  
29  
30  
31  
32  
33  
34  
35  
36  
37  
38  
39  
40  
41  
42  
43  
44  
45  
46  
47  
48  
49  
50  
51  
52  
53  
54  
55  
56  
57  
58  
59  
60

|    |                  |                                                      |               |
|----|------------------|------------------------------------------------------|---------------|
| 58 | Practical Manual | American Journal of Transplantation                  | Bollen et al. |
| 59 | Survey           | Palliative Medicine                                  | Bilsen et al. |
| 60 | Cohort study     | Journal of the American Medical Association Oncology | Blanke et al. |

|                                                                                                                                                                                                 |    |        |                                          |                   |
|-------------------------------------------------------------------------------------------------------------------------------------------------------------------------------------------------|----|--------|------------------------------------------|-------------------|
| 1<br>2<br>3<br>4<br>5<br>6<br>7<br>8<br>9<br>10<br>11<br>12<br>13<br>14<br>15<br>16<br>17<br>18<br>19<br>20<br>21<br>22<br>23<br>24<br>25<br>26<br>27<br>28<br>29<br>30<br>31<br>32<br>33<br>34 | 61 | Review | Annales<br>Pharmaceutiques<br>Françaises | Boissinota et al. |
| 35<br>36<br>37<br>38<br>39<br>40<br>41<br>42<br>43<br>44<br>45<br>46<br>47<br>48<br>49<br>50<br>51<br>52<br>53<br>54<br>55<br>56<br>57<br>58<br>59<br>60                                        | 62 | Review | Praxis                                   | Bosshard          |



|                                                                                                                                                                                  |    |        |                                                            |                 |
|----------------------------------------------------------------------------------------------------------------------------------------------------------------------------------|----|--------|------------------------------------------------------------|-----------------|
| 1<br>2<br>3<br>4<br>5<br>6<br>7<br>8<br>9<br>10<br>11<br>12<br>13<br>14<br>15<br>16<br>17<br>18<br>19<br>20<br>21<br>22<br>23<br>24<br>25<br>26<br>27<br>28<br>29<br>30          | 63 | Survey | JAMA Internal<br>Medicine                                  | Bosshard et al. |
| 31<br>32<br>33<br>34<br>35<br>36<br>37<br>38<br>39<br>40<br>41<br>42<br>43<br>44<br>45<br>46<br>47<br>48<br>49<br>50<br>51<br>52<br>53<br>54<br>55<br>56<br>57<br>58<br>59<br>60 | 64 | Review | American Journal<br>of Hospice &<br>Palliative<br>Medicine | Campbell & Cox  |

1  
2  
3  
4  
5  
6  
7  
8  
9  
10  
11  
12  
13  
14  
15  
16  
17  
18  
19  
20  
21  
22  
23  
24  
25  
26  
27  
28  
29  
30  
31  
32  
33  
34  
35  
36  
37  
38  
39  
40  
41  
42  
43  
44  
45  
46  
47  
48  
49  
50  
51  
52  
53  
54  
55  
56  
57  
58  
59  
60

|    |        |                           |                         |
|----|--------|---------------------------|-------------------------|
| 65 | Survey | CMAJ                      | Chambaere et al.        |
| 66 | Review | Journal of<br>Legislation | Cohen-Almagor & Hartman |

|                                                                                                                                                                                                          |    |           |                                                                                |                |
|----------------------------------------------------------------------------------------------------------------------------------------------------------------------------------------------------------|----|-----------|--------------------------------------------------------------------------------|----------------|
| 1<br>2<br>3<br>4<br>5<br>6<br>7<br>8<br>9<br>10<br>11<br>12<br>13<br>14<br>15                                                                                                                            | 67 | Review    | Journal of<br>Pharmaceutical<br>Care in Pain &<br>Symptom Control              | Crouch         |
| 16<br>17<br>18<br>19<br>20<br>21<br>22<br>23<br>24<br>25<br>26<br>27<br>28<br>29<br>30<br>31<br>32<br>33<br>34<br>35<br>36<br>37<br>38<br>39<br>40<br>41<br>42<br>43<br>44<br>45<br>46<br>47<br>48<br>49 | 68 | Guideline | The Task Force to<br>Improve the Care<br>of Terminally-Ill<br>Oregonians, 2008 | Dunn et al.    |
| 50<br>51<br>52<br>53<br>54<br>55<br>56<br>57<br>58<br>59<br>60                                                                                                                                           | 69 | Survey    | Annals of Internal<br>Medicine                                                 | Emanuel et al. |

|                                                                                                                   |    |                    |                                  |                   |
|-------------------------------------------------------------------------------------------------------------------|----|--------------------|----------------------------------|-------------------|
| 1<br>2<br>3<br>4<br>5<br>6<br>7<br>8<br>9<br>10<br>11<br>12<br>13<br>14<br>15<br>16<br>17<br>18<br>19<br>20<br>21 | 70 | Survey             | Archives of<br>Internal Medicine | Emanuel           |
| 22<br>23<br>24<br>25<br>26<br>27<br>28<br>29<br>30<br>31<br>32                                                    | 71 | Review             | Medical Journal<br>of Brussels   | Engler            |
| 33<br>34<br>35<br>36<br>37<br>38<br>39<br>40<br>41<br>42                                                          | 72 | Position statement | Transplant<br>Proceedings        | Evrard            |
| 43<br>44<br>45<br>46<br>47<br>48                                                                                  | 73 | Survey             | Lancet Oncology                  | Finlay & van Dijk |
| 49<br>50<br>51<br>52<br>53<br>54<br>55<br>56<br>57<br>58<br>59<br>60                                              | 74 | Survey             | Journal of<br>Medical Ethics     | Fischer et al.    |

1  
2  
3  
4  
5  
6  
7  
8  
9  
10  
11  
12  
13  
14  
15  
16  
17  
18  
19  
20  
21  
22  
23  
24  
25  
26  
27  
28  
29  
30  
31  
32  
33  
34  
35  
36  
37  
38  
39  
40  
41  
42  
43  
44  
45  
46  
47  
48  
49  
50  
51  
52  
53  
54  
55  
56  
57  
58  
59  
60

|    |        |                                             |         |
|----|--------|---------------------------------------------|---------|
| 75 | Review | Journal of the American Medical Association | Wachter |
| 76 | Review | Medical Law International                   | Hiscox  |

For peer review only

|                                                                                                                                                                                                                |    |                       |                                                |                     |
|----------------------------------------------------------------------------------------------------------------------------------------------------------------------------------------------------------------|----|-----------------------|------------------------------------------------|---------------------|
| 1<br>2<br>3<br>4<br>5<br>6<br>7<br>8<br>9<br>10<br>11<br>12<br>13<br>14<br>15<br>16<br>17<br>18<br>19<br>20<br>21<br>22<br>23<br>24<br>25                                                                      | 77 | Survey                | Netherlands<br>Tijdschrift voor<br>Geneeskunde | Horikx et al.       |
| 26<br>27<br>28<br>29<br>30<br>31<br>32<br>33<br>34<br>35<br>36<br>37<br>38<br>39<br>40<br>41<br>42<br>43<br>44<br>45<br>46<br>47<br>48<br>49<br>50<br>51<br>52<br>53<br>54<br>55<br>56<br>57<br>58<br>59<br>60 | 78 | Cross-sectional study | International<br>Journal of<br>Nursing Studies | Inghelbrecht et al. |

1  
2  
3  
4  
5  
6  
7  
8  
9  
10  
11  
12  
13  
14  
15  
16  
17  
18  
19  
20  
21  
22  
23  
24  
25  
26  
27  
28  
29  
30  
31  
32  
33  
34  
35  
36  
37  
38  
39  
40  
41  
42  
43  
44  
45  
46  
47  
48  
49  
50  
51  
52  
53  
54  
55  
56  
57  
58  
59  
60

|    |        |                                                          |              |
|----|--------|----------------------------------------------------------|--------------|
| 79 | Review | Journal of pharmaceutical Care in Pain & Symptom Control | Jamison      |
| 80 | Review | Journal of Pharmaceutical Care in Pain & Symptom Control | Kimsma, 1996 |

For peer review only

1  
2  
3  
4  
5  
6  
7  
8  
9  
10  
11  
12  
13  
14  
15  
16  
17  
18  
19  
20  
21  
22  
23  
24  
25  
26  
27  
28  
29  
30  
31  
32  
33  
34  
35  
36  
37  
38  
39  
40  
41  
42  
43  
44  
45  
46  
47  
48  
49  
50  
51  
52  
53  
54  
55  
56  
57  
58  
59  
60

|    |                       |                              |                     |
|----|-----------------------|------------------------------|---------------------|
| 81 | Case Report           | Critical Care<br>Medicine    | Kompanje et al.     |
| 82 | Cross-sectional study | Dutch Journal of<br>Medicine | Lalmohamed & Horikx |

For peer review only



|                                                                                                                                                                                                          |    |                   |                                     |                  |
|----------------------------------------------------------------------------------------------------------------------------------------------------------------------------------------------------------|----|-------------------|-------------------------------------|------------------|
| 1<br>2<br>3<br>4<br>5<br>6<br>7<br>8<br>9                                                                                                                                                                | 83 | Survey            | Pharmacy World<br>& Science         | Lau et al.       |
| 10<br>11<br>12<br>13<br>14<br>15<br>16<br>17<br>18<br>19<br>20<br>21<br>22<br>23<br>24<br>25<br>26<br>27<br>28<br>29<br>30<br>31<br>32<br>33<br>34<br>35<br>36<br>37<br>38<br>39<br>40<br>41<br>42<br>43 | 84 | Qualitative study | Patient Education<br>and Counseling | Lemiengre et al. |
| 44<br>45<br>46<br>47<br>48<br>49<br>50<br>51<br>52<br>53<br>54<br>55<br>56<br>57<br>58<br>59<br>60                                                                                                       | 85 | Review            | Revue Medicale<br>de Bruxelles      | Lossignol        |

|                                                                                                                                                                                                          |    |                       |                                                                                                |                            |
|----------------------------------------------------------------------------------------------------------------------------------------------------------------------------------------------------------|----|-----------------------|------------------------------------------------------------------------------------------------|----------------------------|
| 1<br>2<br>3<br>4<br>5<br>6<br>7<br>8<br>9<br>10<br>11<br>12<br>13<br>14<br>15<br>16<br>17<br>18                                                                                                          | 86 | Guideline             | Tool-Kit for<br>Nursing<br>Excellence at End-<br>of-life Transitions<br>for Nurse<br>Educators | Oregon Nurses Association, |
| 19<br>20<br>21<br>22<br>23<br>24<br>25<br>26<br>27<br>28<br>29<br>30<br>31<br>32<br>33<br>34<br>35<br>36<br>37<br>38<br>39<br>40<br>41<br>42<br>43<br>44<br>45<br>46<br>47<br>48<br>49<br>50<br>51<br>52 | 87 | Cross-sectional study | Health Policy                                                                                  | Pasman et al.              |
| 53<br>54<br>55<br>56<br>57<br>58<br>59<br>60                                                                                                                                                             | 88 | Survey                | La Presse<br>Medicale                                                                          | Pennec et al.              |

|                                                                                                                                                                                                       |    |                   |                                  |                   |
|-------------------------------------------------------------------------------------------------------------------------------------------------------------------------------------------------------|----|-------------------|----------------------------------|-------------------|
| 1<br>2<br>3<br>4<br>5<br>6<br>7<br>8<br>9<br>10<br>11<br>12<br>13<br>14<br>15<br>16<br>17<br>18<br>19<br>20<br>21<br>22<br>23<br>24<br>25<br>26<br>27<br>28<br>29<br>30<br>31<br>32<br>33<br>34<br>35 | 89 | Qualitative Study | Archives of<br>Internal Medicine | Rietjens et al.   |
| 36<br>37<br>38<br>39<br>40<br>41<br>42<br>43<br>44<br>45<br>46<br>47                                                                                                                                  | 90 | Review            | Bioethical Inquiry               | Rietjens et al.   |
| 48<br>49<br>50<br>51<br>52<br>53<br>54<br>55<br>56<br>57<br>58<br>59<br>60                                                                                                                            | 91 | Survey            | Palliative<br>Medicine           | Schildmann et al. |

|                                                                                                                                                                                                       |    |              |               |              |
|-------------------------------------------------------------------------------------------------------------------------------------------------------------------------------------------------------|----|--------------|---------------|--------------|
| 1<br>2<br>3<br>4<br>5<br>6<br>7<br>8<br>9<br>10<br>11<br>12<br>13<br>14<br>15<br>16<br>17<br>18<br>19<br>20<br>21<br>22<br>23<br>24<br>25<br>26<br>27<br>28<br>29<br>30<br>31<br>32<br>33<br>34<br>35 | 92 | Review       | Health Policy | Smets et al. |
| 36<br>37<br>38<br>39<br>40<br>41<br>42<br>43<br>44<br>45<br>46<br>47<br>48<br>49<br>50<br>51<br>52<br>53<br>54<br>55<br>56<br>57<br>58<br>59<br>60                                                    | 93 | Cohort study | Medical Care  | Smets et al. |

1  
2  
3  
4  
5  
6  
7  
8  
9  
10  
11  
12  
13  
14  
15  
16  
17  
18  
19  
20  
21  
22  
23  
24  
25  
26  
27  
28  
29  
30  
31  
32  
33  
34  
35  
36  
37  
38  
39  
40  
41  
42  
43  
44  
45  
46  
47  
48  
49  
50  
51  
52  
53  
54  
55  
56  
57  
58  
59  
60

|    |                       |                                     |              |
|----|-----------------------|-------------------------------------|--------------|
| 94 | Cross-sectional study | British Medical Journal             | Smets et al. |
| 95 | Qualitative           | British Journal of General Practice | Smets et al. |

For peer review only

|                                                                                                                                                                                                                                  |    |              |                              |                  |
|----------------------------------------------------------------------------------------------------------------------------------------------------------------------------------------------------------------------------------|----|--------------|------------------------------|------------------|
| 1<br>2<br>3<br>4<br>5<br>6<br>7<br>8<br>9<br>10<br>11<br>12<br>13<br>14<br>15<br>16<br>17<br>18<br>19<br>20<br>21<br>22                                                                                                          | 96 | Review       | Dutch Journal of<br>Medicine | Sprij            |
| 23<br>24<br>25<br>26<br>27<br>28<br>29<br>30<br>31<br>32<br>33<br>34<br>35<br>36<br>37<br>38<br>39<br>40<br>41<br>42<br>43<br>44<br>45<br>46<br>47<br>48<br>49<br>50<br>51<br>52<br>53<br>54<br>55<br>56<br>57<br>58<br>59<br>60 | 97 | Cohort study | BMJ Open                     | Thienpont et al. |

1  
2  
3  
4  
5  
6  
7  
8  
9  
10  
11  
12  
13  
14  
15  
16  
17  
18  
19  
20  
21  
22  
23  
24  
25  
26  
27  
28  
29  
30  
31  
32  
33  
34  
35  
36  
37  
38  
39  
40  
41  
42  
43  
44  
45  
46  
47  
48  
49  
50  
51  
52  
53  
54  
55  
56  
57  
58  
59  
60

|    |        |                             |                                  |
|----|--------|-----------------------------|----------------------------------|
| 98 | Survey | Journal of Clinical Nursing | van Bruchem-van de Scheur et al. |
| 99 | Survey | Nursing Ethics              | van Bruchem-van de Scheur et al. |

For peer review only

1  
2  
3  
4  
5  
6  
7  
8  
9  
10  
11  
12  
13  
14  
15  
16  
17  
18  
19  
20  
21  
22  
23  
24  
25  
26  
27  
28  
29  
30  
31  
32  
33  
34  
35  
36  
37  
38  
39  
40  
41  
42  
43  
44  
45  
46  
47  
48  
49  
50  
51  
52  
53  
54  
55  
56  
57  
58  
59  
60

|     |        |                              |                      |
|-----|--------|------------------------------|----------------------|
| 100 | Survey | Dutch Journal of<br>Medicine | van der Heide et al. |
|-----|--------|------------------------------|----------------------|

For peer review only



1  
2  
3  
4  
5  
6  
7  
8  
9  
10  
11  
12  
13  
14  
15  
16  
17  
18  
19  
20  
21  
22  
23  
24  
25  
26  
27  
28  
29  
30  
31  
32  
33  
34  
35  
36  
37  
38  
39  
40  
41  
42  
43  
44  
45  
46  
47  
48  
49  
50  
51  
52  
53  
54  
55  
56  
57  
58  
59  
60

|     |                       |                                 |                      |
|-----|-----------------------|---------------------------------|----------------------|
| 101 | Cross-sectional study | New England Journal of Medicine | van der Heide et al. |
|-----|-----------------------|---------------------------------|----------------------|

For peer review only

1  
2  
3  
4  
5  
6  
7  
8  
9  
10  
11  
12  
13  
14  
15  
16  
17  
18  
19  
20  
21  
22  
23  
24  
25  
26  
27  
28  
29  
30  
31  
32  
33  
34  
35  
36  
37  
38  
39  
40  
41  
42  
43  
44  
45  
46  
47  
48  
49  
50  
51  
52  
53  
54  
55  
56  
57  
58  
59  
60

|     |                       |                 |                  |
|-----|-----------------------|-----------------|------------------|
| 102 | Cross-sectional study | Family Practice | van Heest et al. |
|-----|-----------------------|-----------------|------------------|

For peer review only

|                                                                                                                                                                                                       |     |                   |                                  |                    |
|-------------------------------------------------------------------------------------------------------------------------------------------------------------------------------------------------------|-----|-------------------|----------------------------------|--------------------|
| 1<br>2<br>3<br>4<br>5<br>6<br>7<br>8<br>9<br>10<br>11<br>12<br>13<br>14<br>15<br>16<br>17<br>18<br>19<br>20<br>21<br>22<br>23<br>24<br>25<br>26<br>27<br>28<br>29<br>30<br>31<br>32<br>33<br>34<br>35 | 103 | Qualitative study | Palliative<br>Medicine           | van Marwijk et al. |
| 36<br>37<br>38<br>39<br>40<br>41                                                                                                                                                                      | 104 | Cohort study      | Archives of<br>Internal Medicine | Wineberg           |
| 42<br>43<br>44<br>45<br>46<br>47<br>48<br>49<br>50<br>51<br>52<br>53<br>54<br>55<br>56<br>57<br>58<br>59<br>60                                                                                        | 105 | Review            | British Medical<br>Journal       | Ziegler & Bosshard |

1  
2  
3  
4  
5  
6  
7  
8  
9  
10  
11  
12  
13  
14  
15  
16  
17  
18  
19  
20  
21  
22  
23  
24  
25  
26  
27  
28  
29  
30  
31  
32  
33  
34  
35  
36  
37  
38  
39  
40  
41  
42  
43  
44  
45  
46  
47  
48  
49  
50  
51  
52  
53  
54  
55  
56  
57  
58  
59  
60

|     |          |                                |            |
|-----|----------|--------------------------------|------------|
| 106 | Protocol | Unpublished Internal Document. | Health PEI |
|-----|----------|--------------------------------|------------|

For peer review only

|                                                                                                                                                                                                       |     |          |                                                    |                |
|-------------------------------------------------------------------------------------------------------------------------------------------------------------------------------------------------------|-----|----------|----------------------------------------------------|----------------|
| 1<br>2<br>3<br>4<br>5<br>6<br>7<br>8<br>9<br>10<br>11<br>12<br>13<br>14<br>15<br>16<br>17<br>18<br>19<br>20<br>21<br>22<br>23<br>24<br>25<br>26<br>27<br>28<br>29<br>30<br>31<br>32<br>33<br>34<br>35 | 107 | Protocol | KNMG/KNMP<br>(Unpublished<br>Internal<br>Document) | Author Unknown |
| 36<br>37<br>38<br>39<br>40<br>41<br>42<br>43<br>44<br>45<br>46<br>47<br>48<br>49<br>50<br>51<br>52<br>53<br>54<br>55<br>56<br>57<br>58<br>59<br>60                                                    | 108 | Review   | Prescrire<br>international                         | Author Unknown |

1  
2  
3  
4  
5  
6  
7  
8  
9  
10  
11  
12  
13  
14  
15  
16  
17  
18  
19  
20  
21  
22  
23  
24  
25  
26  
27  
28  
29  
30  
31  
32  
33  
34  
35  
36  
37  
38  
39  
40  
41  
42  
43  
44  
45  
46  
47  
48  
49  
50  
51  
52  
53  
54  
55  
56  
57  
58  
59  
60

|     |          |                                                             |                |
|-----|----------|-------------------------------------------------------------|----------------|
| 109 | Protocol | Trillium Health Partners<br>(Unpublished Internal Document) | Author Unknown |
|-----|----------|-------------------------------------------------------------|----------------|

For peer review only

|                                                                                                                                                                                                       |     |          |                                                                     |                |
|-------------------------------------------------------------------------------------------------------------------------------------------------------------------------------------------------------|-----|----------|---------------------------------------------------------------------|----------------|
| 1<br>2<br>3<br>4<br>5<br>6<br>7<br>8<br>9<br>10<br>11<br>12<br>13<br>14<br>15<br>16<br>17<br>18<br>19<br>20<br>21<br>22<br>23<br>24<br>25<br>26<br>27<br>28<br>29<br>30<br>31<br>32<br>33<br>34<br>35 | 110 | Protocol | University Health Network<br>(Unpublished Internal Document)        | Author Unknown |
| 36<br>37<br>38<br>39<br>40<br>41<br>42<br>43<br>44<br>45<br>46<br>47<br>48                                                                                                                            | 111 | Protocol | The Ottawa Hospital<br>(Unpublished Internal Document)              | Author Unknown |
| 49<br>50<br>51<br>52<br>53<br>54<br>55<br>56<br>57<br>58<br>59<br>60                                                                                                                                  | 112 | Protocol | Southlake Regional Health Centre<br>(Unpublished Internal Document) | Author Unknown |

|                                                                                                                                                                                                         |     |          |                                                                                                      |                |
|---------------------------------------------------------------------------------------------------------------------------------------------------------------------------------------------------------|-----|----------|------------------------------------------------------------------------------------------------------|----------------|
| 1<br>2<br>3<br>4<br>5<br>6<br>7<br>8                                                                                                                                                                    | 113 | Protocol | Oakville Trafalger<br>Hospital<br>(Unpublished<br>Internal<br>Document)                              | Author Unknown |
| 9<br>10<br>11<br>12<br>13<br>14<br>15<br>16<br>17<br>18<br>19<br>20<br>21<br>22<br>23<br>24<br>25<br>26<br>27<br>28<br>29<br>30<br>31<br>32<br>33<br>34<br>35<br>36<br>37<br>38<br>39<br>40<br>41<br>42 | 114 | Protocol | Nova Scotia<br>Health Authority<br>(Unpublished<br>Internal<br>Document)                             | Author Unknown |
| 43<br>44<br>45<br>46<br>47<br>48<br>49<br>50<br>51<br>52<br>53<br>54<br>55<br>56<br>57<br>58<br>59<br>60                                                                                                | 115 | Protocol | Vitalité Health<br>Network and<br>Horizon Health<br>Network<br>(Unpublished<br>Internal<br>Document) | Author Unknown |



|                                                                                                                                                                                              |     |          |                                                                        |                |
|----------------------------------------------------------------------------------------------------------------------------------------------------------------------------------------------|-----|----------|------------------------------------------------------------------------|----------------|
| 1<br>2<br>3<br>4<br>5<br>6<br>7<br>8                                                                                                                                                         | 116 | Protocol | Kingston General Hospital<br>(Unpublished Internal Document)           | Author Unknown |
| 9<br>10<br>11<br>12<br>13<br>14<br>15<br>16<br>17<br>18<br>19<br>20<br>21<br>22<br>23<br>24<br>25<br>26<br>27<br>28                                                                          | 117 | Protocol | Brockville General Hospital<br>(Unpublished Internal Document)         | Author Unknown |
| 29<br>30<br>31<br>32<br>33<br>34<br>35<br>36<br>37<br>38<br>39<br>40<br>41<br>42<br>43<br>44<br>45<br>46<br>47<br>48<br>49<br>50<br>51<br>52<br>53<br>54<br>55<br>56<br>57<br>58<br>59<br>60 | 118 | Protocol | British Columbia Ministry of Health<br>(Unpublished Internal Document) | Author Unknown |

|     |          |                                                                                             |                |
|-----|----------|---------------------------------------------------------------------------------------------|----------------|
| 119 | Protocol | Alberta Health Services<br>(Unpublished Internal Document)                                  | Author Unknown |
| 120 | Protocol | The Manitoba Provincial Medical Assistance in Dying Team<br>(Unpublished Internal Document) | Author Unknown |
| 121 | Protocol | Brantford General Hospital<br>(Unpublished Internal Document)                               | Author Unknown |

|                                                                                                                                                                                                       |     |          |                                                                               |                |
|-------------------------------------------------------------------------------------------------------------------------------------------------------------------------------------------------------|-----|----------|-------------------------------------------------------------------------------|----------------|
| 1<br>2<br>3<br>4<br>5<br>6<br>7<br>8<br>9<br>10<br>11<br>12<br>13<br>14<br>15<br>16<br>17<br>18<br>19<br>20<br>21<br>22<br>23<br>24<br>25<br>26<br>27<br>28<br>29<br>30<br>31<br>32<br>33<br>34<br>35 | 122 | Protocol | College de<br>Medecines de<br>Quebec<br>(Unpublished<br>Internal<br>Document) | Author Unknown |
| 36<br>37<br>38<br>39<br>40<br>41<br>42<br>43<br>44<br>45<br>46<br>47<br>48<br>49<br>50<br>51<br>52<br>53<br>54<br>55<br>56<br>57<br>58<br>59<br>60                                                    | 123 | Protocol | Government of<br>Saskatchewan<br>(Unpublished<br>Internal<br>Document)        | Author Unknown |

|                                                                                                                                     |     |        |                                                 |                   |
|-------------------------------------------------------------------------------------------------------------------------------------|-----|--------|-------------------------------------------------|-------------------|
| 1<br>2<br>3<br>4<br>5<br>6<br>7<br>8<br>9<br>10<br>11<br>12<br>13<br>14<br>15<br>16<br>17<br>18<br>19<br>20<br>21<br>22<br>23<br>24 | 124 | Survey | European Journal<br>of Clinical<br>Pharmacology | Borgsteede et al. |
| 25<br>26<br>27<br>28<br>29<br>30<br>31<br>32<br>33<br>34<br>35<br>36<br>37<br>38<br>39<br>40<br>41<br>42<br>43                      | 125 | Review | Journal of<br>Medical Ethcis                    | Bosshard et al.   |
| 44<br>45<br>46<br>47<br>48<br>49<br>50<br>51<br>52<br>53<br>54<br>55<br>56<br>57<br>58<br>59<br>60                                  | 126 | Review | Médecine & Droit                                | Burkhardt et al.  |

1  
2  
3  
4  
5  
6  
7  
8  
9  
10  
11  
12  
13  
14  
15  
16  
17  
18  
19  
20  
21  
22  
23  
24  
25  
26  
27  
28  
29  
30  
31  
32  
33  
34  
35  
36  
37  
38  
39  
40  
41  
42  
43  
44  
45  
46  
47  
48  
49  
50  
51  
52  
53  
54  
55  
56  
57  
58  
59  
60

|     |                       |                                        |                    |
|-----|-----------------------|----------------------------------------|--------------------|
| 127 | Cross-sectional study | Journal of pain and symptom management | Campbell & Black   |
| 128 | Qualitative study     | Journal of medical ethics              | de Casterle et al. |

|                                                                                                                                                    |     |                       |                                                                                                                          |                 |
|----------------------------------------------------------------------------------------------------------------------------------------------------|-----|-----------------------|--------------------------------------------------------------------------------------------------------------------------|-----------------|
| 1<br>2<br>3<br>4<br>5<br>6<br>7<br>8<br>9<br>10<br>11<br>12<br>13<br>14<br>15<br>16<br>17<br>18                                                    | 129 | Qualitative study     | Palliative<br>Medicine                                                                                                   | Dees et al.     |
| 19<br>20<br>21<br>22<br>23<br>24<br>25<br>26<br>27<br>28<br>29<br>30<br>31<br>32<br>33<br>34<br>35<br>36<br>37<br>38<br>39<br>40<br>41<br>42<br>43 | 130 | Cross-sectional study | Abstracts of the<br>9th World<br>Research<br>Congress of the<br>European<br>Association for<br>Palliative Care<br>(EAPC) | Dierickx et al. |
| 44<br>45<br>46<br>47<br>48<br>49<br>50<br>51<br>52<br>53<br>54<br>55<br>56<br>57<br>58<br>59<br>60                                                 | 131 | Survey                | Patient Education<br>and Counseling                                                                                      | Francke et al.  |

1  
2  
3  
4  
5  
6  
7  
8  
9  
10  
11  
12  
13  
14  
15  
16  
17  
18  
19  
20  
21  
22  
23  
24  
25  
26  
27  
28  
29  
30  
31  
32  
33  
34  
35  
36  
37  
38  
39  
40  
41  
42  
43  
44  
45  
46  
47  
48  
49  
50  
51  
52  
53  
54  
55  
56  
57  
58  
59  
60

|     |          |                                            |             |
|-----|----------|--------------------------------------------|-------------|
| 132 | Review   | American Journal of Health-System Pharmacy | Fass & Fass |
| 133 | Protocol | Unpublished Internal Document              | Grube       |

For peer review only

|                                                                                                                                                                                                                                              |     |              |                               |                  |
|----------------------------------------------------------------------------------------------------------------------------------------------------------------------------------------------------------------------------------------------|-----|--------------|-------------------------------|------------------|
| 1<br>2<br>3<br>4<br>5<br>6<br>7<br>8<br>9<br>10<br>11<br>12<br>13<br>14<br>15<br>16<br>17<br>18<br>19<br>20                                                                                                                                  | 134 | Cohort study | Journal of Clinical<br>Ethics | Hedberg et al.   |
| 21<br>22<br>23<br>24<br>25<br>26<br>27<br>28<br>29<br>30<br>31<br>32<br>33<br>34<br>35<br>36<br>37<br>38<br>39<br>40<br>41<br>42<br>43<br>44<br>45<br>46<br>47<br>48<br>49<br>50<br>51<br>52<br>53<br>54<br>55<br>56<br>57<br>58<br>59<br>60 | 135 | Review       | Journal of<br>Medical Ethcis  | Hesselink et al. |



|                                                                                                                                                                |     |                   |                                                             |                |
|----------------------------------------------------------------------------------------------------------------------------------------------------------------|-----|-------------------|-------------------------------------------------------------|----------------|
| 1<br>2<br>3<br>4<br>5<br>6<br>7<br>8<br>9<br>10<br>11<br>12<br>13<br>14<br>15<br>16<br>17<br>18<br>19<br>20                                                    | 136 | Review            | BMC Family Practice                                         | Hicks          |
| 21<br>22<br>23<br>24<br>25<br>26<br>27<br>28<br>29<br>30<br>31<br>32<br>33<br>34<br>35<br>36<br>37<br>38<br>39<br>40<br>41<br>42<br>43<br>44<br>45<br>46<br>47 | 137 | Qualitative study | Medicine, healthcare and philosophy                         | Lemiengre      |
| 48<br>49<br>50<br>51<br>52<br>53<br>54<br>55<br>56<br>57<br>58<br>59<br>60                                                                                     | 138 | Protocol          | Colombia Ministry of Health (Unpublished Internal Document) | Author Unknown |

|                                                                                                                                           |     |                       |                                                  |                             |
|-------------------------------------------------------------------------------------------------------------------------------------------|-----|-----------------------|--------------------------------------------------|-----------------------------|
| 1<br>2<br>3<br>4<br>5<br>6<br>7<br>8<br>9<br>10<br>11<br>12<br>13<br>14<br>15<br>16<br>17<br>18<br>19<br>20<br>21<br>22<br>23<br>24<br>25 | 139 | Case Report           | Journal of<br>medical ethics                     | Ogden                       |
| 26<br>27<br>28<br>29<br>30<br>31<br>32<br>33<br>34<br>35<br>36<br>37<br>38<br>39<br>40                                                    | 140 | Cross-sectional study | Lancet                                           | Onwuteaka-Phillipsen et al. |
| 41<br>42<br>43<br>44<br>45<br>46<br>47<br>48<br>49<br>50<br>51<br>52<br>53<br>54<br>55<br>56<br>57<br>58<br>59<br>60                      | 141 | Cross-sectional study | EAPC Conference<br>2010 (Palliative<br>Medicine) | Smets et al.                |

1  
2  
3  
4  
5  
6  
7  
8  
9  
10  
11  
12  
13  
14  
15  
16  
17  
18  
19  
20  
21  
22  
23  
24  
25  
26  
27  
28  
29  
30  
31  
32  
33  
34  
35  
36  
37  
38  
39  
40  
41  
42  
43  
44  
45  
46  
47  
48  
49  
50  
51  
52  
53  
54  
55  
56  
57  
58  
59  
60

|     |              |                                     |                 |
|-----|--------------|-------------------------------------|-----------------|
| 142 | Cohort study | The New England Journal of Medicine | Sullivan et al. |
| 143 | Cohort study | Neurology                           | Wang et al.     |

For peer review only

|                                                                                                                                                                                                       |     |                            |                                                                                      |                                          |
|-------------------------------------------------------------------------------------------------------------------------------------------------------------------------------------------------------|-----|----------------------------|--------------------------------------------------------------------------------------|------------------------------------------|
| 1<br>2<br>3<br>4<br>5<br>6<br>7<br>8<br>9<br>10<br>11<br>12<br>13<br>14<br>15<br>16<br>17<br>18<br>19<br>20<br>21<br>22<br>23<br>24<br>25<br>26<br>27<br>28<br>29<br>30<br>31<br>32<br>33<br>34<br>35 | 144 | Protocol                   | Washington State<br>Department of<br>Health                                          | Washington State Department<br>of Health |
| 36<br>37<br>38<br>39<br>40<br>41<br>42<br>43<br>44<br>45<br>46<br>47<br>48<br>49<br>50<br>51<br>52<br>53<br>54<br>55<br>56<br>57<br>58<br>59<br>60                                                    | 145 | Clinical practice handbook | Ontario College<br>of Family<br>Physicians<br>Collaborative<br>Mentoring<br>Networks | Weiss et al.                             |

1  
2  
3  
4  
5  
6  
7  
8  
9  
10  
11  
12  
13  
14  
15  
16  
17  
18  
19  
20  
21  
22  
23  
24  
25  
26  
27  
28  
29  
30  
31  
32  
33  
34  
35  
36  
37  
38  
39  
40  
41  
42  
43  
44  
45  
46  
47  
48  
49  
50  
51  
52  
53  
54  
55  
56  
57  
58  
59  
60

|     |              |                                                                                  |                 |
|-----|--------------|----------------------------------------------------------------------------------|-----------------|
| 146 | Cohort study | Abstracts of the 17th Congress of the European Society for Organ Transplantation | Ysebaert et al. |
|-----|--------------|----------------------------------------------------------------------------------|-----------------|

For peer review only

1  
2  
3  
4  
5  
6  
7  
8  
9  
10  
11  
12  
13  
14  
15  
16  
17  
18  
19  
20  
21  
22  
23  
24  
25  
26  
27  
28  
29  
30  
31  
32  
33  
34  
35  
36  
37  
38  
39  
40  
41  
42  
43  
44  
45  
46  
47  
48  
49  
50  
51  
52  
53  
54  
55  
56  
57  
58  
59  
60

|     |                   |      |                |
|-----|-------------------|------|----------------|
| 147 | Systematic Review | JAMA | Emanuel et al. |
|-----|-------------------|------|----------------|

For peer review only

1  
2  
3  
4  
5  
6  
7  
8  
9  
10  
11  
12  
13  
14  
15  
16  
17  
18  
19  
20  
21  
22  
23  
24  
25  
26  
27  
28  
29  
30  
31  
32  
33  
34  
35  
36  
37  
38  
39  
40  
41  
42  
43  
44  
45  
46  
47  
48  
49  
50  
51  
52  
53  
54  
55  
56  
57  
58  
59  
60

|  |  |  |  |
|--|--|--|--|
|  |  |  |  |
|--|--|--|--|

For peer review only

| <b>Year</b> | <b>Country</b> |
|-------------|----------------|
| 2001        | USA            |
| 1996        | USA            |
| 2014        | France         |

For peer review only



1  
2  
3  
4  
5  
6  
7  
8  
9  
10  
11  
12  
13  
14  
15  
16  
17  
18  
19  
20  
21  
22  
23  
24  
25  
26  
27  
28  
29  
30  
31  
32  
33  
34  
35  
36  
37  
38  
39  
40  
41  
42  
43  
44  
45  
46  
47  
48  
49  
50  
51  
52  
53  
54  
55  
56  
57  
58  
59  
60

|      |         |
|------|---------|
| 2008 | Belgium |
| 2015 | Belgium |

For peer review only

|      |             |
|------|-------------|
| 1999 | USA         |
| 1997 | Netherlands |
| 2008 | Belgium     |

For peer review only

1  
2  
3  
4  
5  
6  
7  
8  
9  
10  
11  
12  
13  
14  
15  
16  
17  
18  
19  
20  
21  
22  
23  
24  
25  
26  
27  
28  
29  
30  
31  
32  
33  
34  
35  
36  
37  
38  
39  
40  
41  
42  
43  
44  
45  
46  
47  
48  
49  
50  
51  
52  
53  
54  
55  
56  
57  
58  
59  
60

|      |         |
|------|---------|
| 2010 | Belgium |
| 2010 | Belgium |

For peer review only

|      |             |
|------|-------------|
| 2000 | Netherlands |
| 2006 | USA         |

For peer review only

1  
2  
3  
4  
5  
6  
7  
8  
9  
10  
11  
12  
13  
14  
15  
16  
17  
18  
19  
20  
21  
22  
23  
24  
25  
26  
27  
28  
29  
30  
31  
32  
33  
34  
35  
36  
37  
38  
39  
40  
41  
42  
43  
44  
45  
46  
47  
48  
49  
50  
51  
52  
53  
54  
55  
56  
57  
58  
59  
60

|      |         |
|------|---------|
| 2009 | Belgium |
| 2013 | USA     |

For peer review only

|      |              |
|------|--------------|
| 2006 | Multi-region |
| 1998 | USA          |
| 1994 | Canada       |
| 2008 | Switzerland  |

1  
2  
3  
4  
5  
6  
7  
8  
9  
10  
11  
12  
13  
14  
15  
16  
17  
18  
19  
20  
21  
22  
23  
24  
25  
26  
27  
28  
29  
30  
31  
32  
33  
34  
35  
36  
37  
38  
39  
40  
41  
42  
43  
44  
45  
46  
47  
48  
49  
50  
51  
52  
53  
54  
55  
56  
57  
58  
59  
60

|      |             |
|------|-------------|
| 2006 | Netherlands |
| 2011 | USA         |

For peer review only

|      |             |
|------|-------------|
| 1998 | Netherlands |
| 2004 | Belgium     |
| 2005 | USA         |

For peer review only



1  
2  
3  
4  
5  
6  
7  
8  
9  
10  
11  
12  
13  
14  
15  
16  
17  
18  
19  
20  
21  
22  
23  
24  
25  
26  
27  
28  
29  
30  
31  
32  
33  
34  
35  
36  
37  
38  
39  
40  
41  
42  
43  
44  
45  
46  
47  
48  
49  
50  
51  
52  
53  
54  
55  
56  
57  
58  
59  
60

|      |             |
|------|-------------|
| 1987 | Netherlands |
| 1996 | USA         |
| 1992 | Netherlands |

For peer review only

|      |                                                                  |
|------|------------------------------------------------------------------|
| 2004 | Belgium                                                          |
| 2002 | Multi-region<br>(The Netherlands,<br>Oregon, and<br>Switzerland) |
| 2003 | Switzerland                                                      |
| 2009 | Netherlands                                                      |

1  
2  
3  
4  
5  
6  
7  
8  
9  
10  
11  
12  
13  
14  
15  
16  
17  
18  
19  
20  
21  
22  
23  
24  
25  
26  
27  
28  
29  
30  
31  
32  
33  
34  
35  
36  
37  
38  
39  
40  
41  
42  
43  
44  
45  
46  
47  
48  
49  
50  
51  
52  
53  
54  
55  
56  
57  
58  
59  
60

|      |                                                                               |
|------|-------------------------------------------------------------------------------|
| 2004 | Multi-region<br>(The Netherlands,<br>Australia,<br>Belgium, Japan,<br>Oregon) |
| 1998 | USA                                                                           |

For peer review only

|      |     |
|------|-----|
| 2009 | USA |
| 1996 | USA |
| 2003 | USA |
| 2002 | USA |

1  
2  
3  
4  
5  
6  
7  
8  
9  
10  
11  
12  
13  
14  
15  
16  
17  
18  
19  
20  
21  
22  
23  
24  
25  
26  
27  
28  
29  
30  
31  
32  
33  
34  
35  
36  
37  
38  
39  
40  
41  
42  
43  
44  
45  
46  
47  
48  
49  
50  
51  
52  
53  
54  
55  
56  
57  
58  
59  
60

|      |             |
|------|-------------|
| 2010 | Belgium     |
| 2011 | Belgium     |
| 1997 | USA         |
| 2003 | USA         |
| 2001 | Netherlands |

For peer review only

|                                                                                                                                                                                                 |                  |
|-------------------------------------------------------------------------------------------------------------------------------------------------------------------------------------------------|------------------|
| 1<br>2<br>3<br>4<br>5<br>6<br>7<br>8<br>9<br>10<br>11<br>12<br>13<br>14<br>15<br>16<br>17<br>18<br>19<br>20<br>21<br>22<br>23<br>24<br>25<br>26<br>27<br>28<br>29<br>30<br>31<br>32<br>33<br>34 | 2000 USA         |
| 35<br>36<br>37<br>38<br>39<br>40<br>41<br>42<br>43<br>44<br>45<br>46<br>47<br>48<br>49<br>50<br>51<br>52<br>53<br>54<br>55                                                                      | 1997 Netherlands |
| 56<br>57<br>58<br>59<br>60                                                                                                                                                                      | 1997 Netherlands |

1  
2  
3  
4  
5  
6  
7  
8  
9  
10  
11  
12  
13  
14  
15  
16  
17  
18  
19  
20  
21  
22  
23  
24  
25  
26  
27  
28  
29  
30  
31  
32  
33  
34  
35  
36  
37  
38  
39  
40  
41  
42  
43  
44  
45  
46  
47  
48  
49  
50  
51  
52  
53  
54  
55  
56  
57  
58  
59  
60

|      |                                              |
|------|----------------------------------------------|
| 1995 | Netherlands                                  |
| 1998 | Netherlands                                  |
| 2012 | Multi-region<br>(Belgium and<br>Netherlands) |
| 1995 | USA                                          |
| 1999 | Netherlands                                  |
| 2001 | Netherlands                                  |

For peer review only

1  
2  
3  
4  
5  
6  
7  
8  
9  
10  
11  
12  
13  
14  
15  
16  
17  
18  
19  
20  
21  
22  
23  
24  
25  
26  
27  
28  
29  
30  
31  
32  
33  
34  
35  
36  
37  
38  
39  
40  
41  
42  
43  
44  
45  
46  
47  
48  
49  
50  
51  
52  
53  
54  
55  
56  
57  
58  
59  
60

|      |             |
|------|-------------|
| 2007 | Netherlands |
| 1998 | Netherlands |

For peer review only



1  
2  
3  
4  
5  
6  
7  
8  
9  
10  
11  
12  
13  
14  
15  
16  
17  
18  
19  
20  
21  
22  
23  
24  
25  
26  
27  
28  
29  
30  
31  
32  
33  
34  
35  
36  
37  
38  
39  
40  
41  
42  
43  
44  
45  
46  
47  
48  
49  
50  
51  
52  
53  
54  
55  
56  
57  
58  
59  
60

|      |             |
|------|-------------|
| 1995 | Netherlands |
| 1996 | Netherlands |
| 1992 | Netherlands |

For peer review only

|      |                                     |
|------|-------------------------------------|
| 2016 | Multi-region<br>(Europe and<br>USA) |
| 1999 | Netherlands                         |

For peer review only

1  
2  
3  
4  
5  
6  
7  
8  
9  
10  
11  
12  
13  
14  
15  
16  
17  
18  
19  
20  
21  
22  
23  
24  
25  
26  
27  
28  
29  
30  
31  
32  
33  
34  
35  
36  
37  
38  
39  
40  
41  
42  
43  
44  
45  
46  
47  
48  
49  
50  
51  
52  
53  
54  
55  
56  
57  
58  
59  
60

|      |             |
|------|-------------|
| 2016 | Netherlands |
| 2005 | Belgium     |
| 2017 | USA         |

For peer review only

|                                                                                                                                                                                                 |                                                           |
|-------------------------------------------------------------------------------------------------------------------------------------------------------------------------------------------------|-----------------------------------------------------------|
| 1<br>2<br>3<br>4<br>5<br>6<br>7<br>8<br>9<br>10<br>11<br>12<br>13<br>14<br>15<br>16<br>17<br>18<br>19<br>20<br>21<br>22<br>23<br>24<br>25<br>26<br>27<br>28<br>29<br>30<br>31<br>32<br>33<br>34 | 2014 Multi-region<br>(European<br>Union Member<br>States) |
| 35<br>36<br>37<br>38<br>39<br>40<br>41<br>42<br>43<br>44<br>45<br>46<br>47<br>48<br>49<br>50<br>51<br>52<br>53<br>54<br>55<br>56<br>57<br>58<br>59<br>60                                        | 2012 Switzerland                                          |

1  
2  
3  
4  
5  
6  
7  
8  
9  
10  
11  
12  
13  
14  
15  
16  
17  
18  
19  
20  
21  
22  
23  
24  
25  
26  
27  
28  
29  
30  
31  
32  
33  
34  
35  
36  
37  
38  
39  
40  
41  
42  
43  
44  
45  
46  
47  
48  
49  
50  
51  
52  
53  
54  
55  
56  
57  
58  
59  
60

|      |             |
|------|-------------|
| 2016 | Switzerland |
| 2012 | USA         |

For peer review only

1  
2  
3  
4  
5  
6  
7  
8  
9  
10  
11  
12  
13  
14  
15  
16  
17  
18  
19  
20  
21  
22  
23  
24  
25  
26  
27  
28  
29  
30  
31  
32  
33  
34  
35  
36  
37  
38  
39  
40  
41  
42  
43  
44  
45  
46  
47  
48  
49  
50  
51  
52  
53  
54  
55  
56  
57  
58  
59  
60

|      |         |
|------|---------|
| 2010 | Belgium |
| 2001 | USA     |

For peer review only

1  
2  
3  
4  
5  
6  
7  
8  
9  
10  
11  
12  
13  
14  
15  
16  
17  
18  
19  
20  
21  
22  
23  
24  
25  
26  
27  
28  
29  
30  
31  
32  
33  
34  
35  
36  
37  
38  
39  
40  
41  
42  
43  
44  
45  
46  
47  
48  
49  
50  
51  
52  
53  
54  
55  
56  
57  
58  
59  
60

|      |     |
|------|-----|
| 1996 | USA |
| 2008 | USA |
| 2000 | USA |

For peer review only

|      |             |
|------|-------------|
| 2000 | USA         |
| 2007 | Belgium     |
| 2013 | Belgium     |
| 2002 | Netherlands |
| 2007 | Switzerland |



1  
2  
3  
4  
5  
6  
7  
8  
9  
10  
11  
12  
13  
14  
15  
16  
17  
18  
19  
20  
21  
22  
23  
24  
25  
26  
27  
28  
29  
30  
31  
32  
33  
34  
35  
36  
37  
38  
39  
40  
41  
42  
43  
44  
45  
46  
47  
48  
49  
50  
51  
52  
53  
54  
55  
56  
57  
58  
59  
60

|      |             |
|------|-------------|
| 1989 | Netherlands |
| 2007 | USA         |

For peer review only

1  
2  
3  
4  
5  
6  
7  
8  
9  
10  
11  
12  
13  
14  
15  
16  
17  
18  
19  
20  
21  
22  
23  
24  
25  
26  
27  
28  
29  
30  
31  
32  
33  
34  
35  
36  
37  
38  
39  
40  
41  
42  
43  
44  
45  
46  
47  
48  
49  
50  
51  
52  
53  
54  
55  
56  
57  
58  
59  
60

|      |             |
|------|-------------|
| 2000 | Netherlands |
| 2008 | Belgium     |

For peer review only

1  
2  
3  
4  
5  
6  
7  
8  
9  
10  
11  
12  
13  
14  
15  
16  
17  
18  
19  
20  
21  
22  
23  
24  
25  
26  
27  
28  
29  
30  
31  
32  
33  
34  
35  
36  
37  
38  
39  
40  
41  
42  
43  
44  
45  
46  
47  
48  
49  
50  
51  
52  
53  
54  
55  
56  
57  
58  
59  
60

|      |             |
|------|-------------|
| 1996 | USA         |
| 1996 | Netherlands |

For peer review only

1  
2  
3  
4  
5  
6  
7  
8  
9  
10  
11  
12  
13  
14  
15  
16  
17  
18  
19  
20  
21  
22  
23  
24  
25  
26  
27  
28  
29  
30  
31  
32  
33  
34  
35  
36  
37  
38  
39  
40  
41  
42  
43  
44  
45  
46  
47  
48  
49  
50  
51  
52  
53  
54  
55  
56  
57  
58  
59  
60

|      |             |
|------|-------------|
| 2007 | Netherlands |
| 2010 | Netherlands |

For peer review only

1  
2  
3  
4  
5  
6  
7  
8  
9  
10  
11  
12  
13  
14  
15  
16  
17  
18  
19  
20  
21  
22  
23  
24  
25  
26  
27  
28  
29  
30  
31  
32  
33  
34  
35  
36  
37  
38  
39  
40  
41  
42  
43  
44  
45  
46  
47  
48  
49  
50  
51  
52  
53  
54  
55  
56  
57  
58  
59  
60

|      |             |
|------|-------------|
| 2000 | Netherlands |
| 2008 | Belgium     |
| 2008 | Belgium     |

For peer review only

|      |             |
|------|-------------|
| 2001 | USA         |
| 2009 | Netherlands |
| 2015 | France      |

For peer review only

1  
2  
3  
4  
5  
6  
7  
8  
9  
10  
11  
12  
13  
14  
15  
16  
17  
18  
19  
20  
21  
22  
23  
24  
25  
26  
27  
28  
29  
30  
31  
32  
33  
34  
35  
36  
37  
38  
39  
40  
41  
42  
43  
44  
45  
46  
47  
48  
49  
50  
51  
52  
53  
54  
55  
56  
57  
58  
59  
60

|      |             |
|------|-------------|
| 2006 | Netherlands |
| 2009 | Netherlands |
| 2010 | Germany     |

For peer review only

|                                                                                                                                                                                                 |                                                |
|-------------------------------------------------------------------------------------------------------------------------------------------------------------------------------------------------|------------------------------------------------|
| 1<br>2<br>3<br>4<br>5<br>6<br>7<br>8<br>9<br>10<br>11<br>12<br>13<br>14<br>15<br>16<br>17<br>18<br>19<br>20<br>21<br>22<br>23<br>24<br>25<br>26<br>27<br>28<br>29<br>30<br>31<br>32<br>33<br>34 | 2009 Multi-region<br>(Netherlands,<br>Belgium) |
| 35<br>36<br>37<br>38<br>39<br>40<br>41<br>42<br>43<br>44<br>45<br>46<br>47<br>48<br>49<br>50<br>51<br>52<br>53<br>54<br>55<br>56<br>57<br>58<br>59<br>60                                        | 2010 Belgium                                   |

For peer review only



1  
2  
3  
4  
5  
6  
7  
8  
9  
10  
11  
12  
13  
14  
15  
16  
17  
18  
19  
20  
21  
22  
23  
24  
25  
26  
27  
28  
29  
30  
31  
32  
33  
34  
35  
36  
37  
38  
39  
40  
41  
42  
43  
44  
45  
46  
47  
48  
49  
50  
51  
52  
53  
54  
55  
56  
57  
58  
59  
60

|      |         |
|------|---------|
| 2010 | Belgium |
| 2010 | Belgium |

For peer review only

|      |             |
|------|-------------|
| 2010 | Netherlands |
| 2015 | Belgium     |

For peer review only

1  
2  
3  
4  
5  
6  
7  
8  
9  
10  
11  
12  
13  
14  
15  
16  
17  
18  
19  
20  
21  
22  
23  
24  
25  
26  
27  
28  
29  
30  
31  
32  
33  
34  
35  
36  
37  
38  
39  
40  
41  
42  
43  
44  
45  
46  
47  
48  
49  
50  
51  
52  
53  
54  
55  
56  
57  
58  
59  
60

|      |             |
|------|-------------|
| 2008 | Netherlands |
| 2008 | Netherlands |

For peer review only

1  
2  
3  
4  
5  
6  
7  
8  
9  
10  
11  
12  
13  
14  
15  
16  
17  
18  
19  
20  
21  
22  
23  
24  
25  
26  
27  
28  
29  
30  
31  
32  
33  
34  
35  
36  
37  
38  
39  
40  
41  
42  
43  
44  
45  
46  
47  
48  
49  
50  
51  
52  
53  
54  
55  
56  
57  
58  
59  
60

|      |             |
|------|-------------|
| 2007 | Netherlands |
|------|-------------|

For peer review only

1  
2  
3  
4  
5  
6  
7  
8  
9  
10  
11  
12  
13  
14  
15  
16  
17  
18  
19  
20  
21  
22  
23  
24  
25  
26  
27  
28  
29  
30  
31  
32  
33  
34  
35  
36  
37  
38  
39  
40  
41  
42  
43  
44  
45  
46  
47  
48  
49  
50  
51  
52  
53  
54  
55  
56  
57  
58  
59  
60

|      |             |
|------|-------------|
| 2007 | Netherlands |
|------|-------------|

For peer review only

1  
2  
3  
4  
5  
6  
7  
8  
9  
10  
11  
12  
13  
14  
15  
16  
17  
18  
19  
20  
21  
22  
23  
24  
25  
26  
27  
28  
29  
30  
31  
32  
33  
34  
35  
36  
37  
38  
39  
40  
41  
42  
43  
44  
45  
46  
47  
48  
49  
50  
51  
52  
53  
54  
55  
56  
57  
58  
59  
60

|      |             |
|------|-------------|
| 2009 | Netherlands |
|------|-------------|

For peer review only

1  
2  
3  
4  
5  
6  
7  
8  
9  
10  
11  
12  
13  
14  
15  
16  
17  
18  
19  
20  
21  
22  
23  
24  
25  
26  
27  
28  
29  
30  
31  
32  
33  
34  
35  
36  
37  
38  
39  
40  
41  
42  
43  
44  
45  
46  
47  
48  
49  
50  
51  
52  
53  
54  
55  
56  
57  
58  
59  
60

|      |                                       |
|------|---------------------------------------|
| 2007 | Netherlands                           |
| 2000 | USA                                   |
| 2007 | Multi-region<br>(Switzerland,<br>USA) |

For peer review only

1  
2  
3  
4  
5  
6  
7  
8  
9  
10  
11  
12  
13  
14  
15  
16  
17  
18  
19  
20  
21  
22  
23  
24  
25  
26  
27  
28  
29  
30  
31  
32  
33  
34  
35  
36  
37  
38  
39  
40  
41  
42  
43  
44  
45  
46  
47  
48  
49  
50  
51  
52  
53  
54  
55  
56  
57  
58  
59  
60

|      |        |
|------|--------|
| 2016 | Canada |
|------|--------|

For peer review only



1  
2  
3  
4  
5  
6  
7  
8  
9  
10  
11  
12  
13  
14  
15  
16  
17  
18  
19  
20  
21  
22  
23  
24  
25  
26  
27  
28  
29  
30  
31  
32  
33  
34  
35  
36  
37  
38  
39  
40  
41  
42  
43  
44  
45  
46  
47  
48  
49  
50  
51  
52  
53  
54  
55  
56  
57  
58  
59  
60

|      |             |
|------|-------------|
| 2012 | Netherlands |
| 2005 | Belgium     |

For peer review only

1  
2  
3  
4  
5  
6  
7  
8  
9  
10  
11  
12  
13  
14  
15  
16  
17  
18  
19  
20  
21  
22  
23  
24  
25  
26  
27  
28  
29  
30  
31  
32  
33  
34  
35  
36  
37  
38  
39  
40  
41  
42  
43  
44  
45  
46  
47  
48  
49  
50  
51  
52  
53  
54  
55  
56  
57  
58  
59  
60

|      |        |
|------|--------|
| 2016 | Canada |
|------|--------|

For peer review only

1  
2  
3  
4  
5  
6  
7  
8  
9  
10  
11  
12  
13  
14  
15  
16  
17  
18  
19  
20  
21  
22  
23  
24  
25  
26  
27  
28  
29  
30  
31  
32  
33  
34  
35  
36  
37  
38  
39  
40  
41  
42  
43  
44  
45  
46  
47  
48  
49  
50  
51  
52  
53  
54  
55  
56  
57  
58  
59  
60

|      |        |
|------|--------|
| 2017 | Canada |
| 2016 | Canada |
| 2017 | Canada |

For peer review only

1  
2  
3  
4  
5  
6  
7  
8  
9  
10  
11  
12  
13  
14  
15  
16  
17  
18  
19  
20  
21  
22  
23  
24  
25  
26  
27  
28  
29  
30  
31  
32  
33  
34  
35  
36  
37  
38  
39  
40  
41  
42  
43  
44  
45  
46  
47  
48  
49  
50  
51  
52  
53  
54  
55  
56  
57  
58  
59  
60

|      |        |
|------|--------|
| 2016 | Canada |
| 2016 | Canada |
| 2017 | Canada |

For peer review only

1  
2  
3  
4  
5  
6  
7  
8  
9  
10  
11  
12  
13  
14  
15  
16  
17  
18  
19  
20  
21  
22  
23  
24  
25  
26  
27  
28  
29  
30  
31  
32  
33  
34  
35  
36  
37  
38  
39  
40  
41  
42  
43  
44  
45  
46  
47  
48  
49  
50  
51  
52  
53  
54  
55  
56  
57  
58  
59  
60

|      |        |
|------|--------|
| 2016 | Canada |
| 2016 | Canada |
| 2018 | Canada |

For peer review only

1  
2  
3  
4  
5  
6  
7  
8  
9  
10  
11  
12  
13  
14  
15  
16  
17  
18  
19  
20  
21  
22  
23  
24  
25  
26  
27  
28  
29  
30  
31  
32  
33  
34  
35  
36  
37  
38  
39  
40  
41  
42  
43  
44  
45  
46  
47  
48  
49  
50  
51  
52  
53  
54  
55  
56  
57  
58  
59  
60

|      |        |
|------|--------|
| 2018 | Canada |
| 2017 | Canada |
| 2018 | Canada |

For peer review only

1  
2  
3  
4  
5  
6  
7  
8  
9  
10  
11  
12  
13  
14  
15  
16  
17  
18  
19  
20  
21  
22  
23  
24  
25  
26  
27  
28  
29  
30  
31  
32  
33  
34  
35  
36  
37  
38  
39  
40  
41  
42  
43  
44  
45  
46  
47  
48  
49  
50  
51  
52  
53  
54  
55  
56  
57  
58  
59  
60

|      |        |
|------|--------|
| 2017 | Canada |
| 2016 | Canada |

For peer review only

|                                                                                                                                           |                                                                                           |
|-------------------------------------------------------------------------------------------------------------------------------------------|-------------------------------------------------------------------------------------------|
| 1<br>2<br>3<br>4<br>5<br>6<br>7<br>8<br>9<br>10<br>11<br>12<br>13<br>14<br>15<br>16<br>17<br>18<br>19<br>20<br>21<br>22<br>23<br>24<br>25 | 2011 Netherlands                                                                          |
| 26<br>27<br>28<br>29<br>30<br>31<br>32<br>33<br>34<br>35<br>36<br>37<br>38<br>39<br>40<br>41<br>42<br>43                                  | 2008 Multi-region<br>(Belgium,<br>Netherlands,<br>Switzerland,<br>Germany,<br>Norway, UK) |
| 44<br>45<br>46<br>47<br>48<br>49<br>50<br>51<br>52<br>53<br>54<br>55<br>56<br>57<br>58<br>59<br>60                                        | 2014 Switzerland                                                                          |



1  
2  
3  
4  
5  
6  
7  
8  
9  
10  
11  
12  
13  
14  
15  
16  
17  
18  
19  
20  
21  
22  
23  
24  
25  
26  
27  
28  
29  
30  
31  
32  
33  
34  
35  
36  
37  
38  
39  
40  
41  
42  
43  
44  
45  
46  
47  
48  
49  
50  
51  
52  
53  
54  
55  
56  
57  
58  
59  
60

|      |         |
|------|---------|
| 2014 | USA     |
| 2006 | Belgium |

For peer review only

|      |             |
|------|-------------|
| 2013 | Netherlands |
| 2016 | Belgium     |
| 2015 | Netherlands |

For peer review only

1  
2  
3  
4  
5  
6  
7  
8  
9  
10  
11  
12  
13  
14  
15  
16  
17  
18  
19  
20  
21  
22  
23  
24  
25  
26  
27  
28  
29  
30  
31  
32  
33  
34  
35  
36  
37  
38  
39  
40  
41  
42  
43  
44  
45  
46  
47  
48  
49  
50  
51  
52  
53  
54  
55  
56  
57  
58  
59  
60

|      |     |
|------|-----|
| 2011 | USA |
| 2014 | USA |

For peer review only

|      |             |
|------|-------------|
| 2009 | USA         |
| 2012 | Netherlands |

For peer review only

1  
2  
3  
4  
5  
6  
7  
8  
9  
10  
11  
12  
13  
14  
15  
16  
17  
18  
19  
20  
21  
22  
23  
24  
25  
26  
27  
28  
29  
30  
31  
32  
33  
34  
35  
36  
37  
38  
39  
40  
41  
42  
43  
44  
45  
46  
47  
48  
49  
50  
51  
52  
53  
54  
55  
56  
57  
58  
59  
60

|      |              |
|------|--------------|
| 2006 | Multi-region |
| 2008 | Belgium      |
| 2015 | Columbia     |

For peer review only

1  
2  
3  
4  
5  
6  
7  
8  
9  
10  
11  
12  
13  
14  
15  
16  
17  
18  
19  
20  
21  
22  
23  
24  
25  
26  
27  
28  
29  
30  
31  
32  
33  
34  
35  
36  
37  
38  
39  
40  
41  
42  
43  
44  
45  
46  
47  
48  
49  
50  
51  
52  
53  
54  
55  
56  
57  
58  
59  
60

|      |             |
|------|-------------|
| 2010 | Switzerland |
| 2012 | Netherlands |
| 2010 | Belgium     |

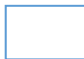

For peer review only

1  
2  
3  
4  
5  
6  
7  
8  
9  
10  
11  
12  
13  
14  
15  
16  
17  
18  
19  
20  
21  
22  
23  
24  
25  
26  
27  
28  
29  
30  
31  
32  
33  
34  
35  
36  
37  
38  
39  
40  
41  
42  
43  
44  
45  
46  
47  
48  
49  
50  
51  
52  
53  
54  
55  
56  
57  
58  
59  
60

|      |     |
|------|-----|
| 2000 | USA |
| 2015 | USA |

For peer review only

|      |        |
|------|--------|
| 2015 | USA    |
| 2018 | Canada |

For peer review only



1  
2  
3  
4  
5  
6  
7  
8  
9  
10  
11  
12  
13  
14  
15  
16  
17  
18  
19  
20  
21  
22  
23  
24  
25  
26  
27  
28  
29  
30  
31  
32  
33  
34  
35  
36  
37  
38  
39  
40  
41  
42  
43  
44  
45  
46  
47  
48  
49  
50  
51  
52  
53  
54  
55  
56  
57  
58  
59  
60

|      |         |
|------|---------|
| 2015 | Belgium |
|------|---------|

For peer review only

|      |                                          |
|------|------------------------------------------|
| 2016 | Multi-region<br>(USA, Canada,<br>Europe) |
|------|------------------------------------------|

For peer review only

1  
2  
3  
4  
5  
6  
7  
8  
9  
10  
11  
12  
13  
14  
15  
16  
17  
18  
19  
20  
21  
22  
23  
24  
25  
26  
27  
28  
29  
30  
31  
32  
33  
34  
35  
36  
37  
38  
39  
40  
41  
42  
43  
44  
45  
46  
47  
48  
49  
50  
51  
52  
53  
54  
55  
56  
57  
58  
59  
60

|  |  |
|--|--|
|  |  |
|--|--|

For peer review only

1  
2  
3  
4  
5  
6  
7  
8  
9  
10  
11  
12  
13  
14  
15  
16  
17  
18  
19  
20  
21  
22  
23  
24  
25  
26  
27  
28  
29  
30  
31  
32  
33  
34  
35  
36  
37  
38  
39  
40  
41  
42  
43  
44  
45  
46  
47  
48  
49  
50  
51  
52  
53  
54  
55  
56  
57  
58  
59  
60

| <p><b>MAID Provision: Medications</b></p>                                                                                                                                                                                                                                                                                                                                                                      |
|----------------------------------------------------------------------------------------------------------------------------------------------------------------------------------------------------------------------------------------------------------------------------------------------------------------------------------------------------------------------------------------------------------------|
| <p><i>Pharmaceutical Used - IV Protocol</i></p>                                                                                                                                                                                                                                                                                                                                                                |
| <p>Not specified</p>                                                                                                                                                                                                                                                                                                                                                                                           |
| <p>Not specified</p>                                                                                                                                                                                                                                                                                                                                                                                           |
| <p>1. anxiolytic: lorazepam 2.5 to 5 mg IV slow or sublingual or midazolam 2 to 3 mg IV or SC<br/>                     2. barbiturate: thiopental 1 to 2 mg IV (IM or SC injections painful), intended to induce a coma<br/>                     3. Curare: after loss of consciousness and if death has not already occurred, pancuronium 20 mg IV, inducing muscle hypotonia and depression of breathing</p> |

For peer review only

1  
2  
3  
4  
5  
6  
7  
8  
9  
10  
11  
12  
13  
14  
15  
16  
17  
18  
19  
20  
21  
22  
23  
24  
25  
26  
27  
28  
29  
30  
31  
32  
33  
34  
35  
36  
37  
38  
39  
40  
41  
42  
43  
44  
45  
46  
47  
48  
49  
50  
51  
52  
53  
54  
55  
56  
57  
58  
59  
60

- Thiopental or similar IV alone
- Thiopental followed by muscle relaxant IV
- Thiopental followed by muscle relaxant and KCl IV
- Morphine alone or with sedatives
- Morphine followed by muscle relaxant IV
- Midazolam alone IV
- Midazolam followed by muscle relaxant IV
- Various inducers of unconsciousness followed by KCl IV

Not specified

For peer review only

1  
2 Not specified  
3  
4  
5  
6  
7  
8  
9  
10  
11  
12  
13  
14  
15

16 The choice of drugs for euthanasia generally followed published  
17 guidelines that recommend the combination of a barbiturate and a  
18 muscle relaxant given parenterally and a barbiturate mixture given  
19 orally. (See Table 1)

20 not specified  
21  
22  
23  
24  
25  
26  
27  
28  
29  
30  
31  
32  
33  
34  
35  
36  
37  
38  
39  
40  
41  
42  
43  
44  
45  
46  
47  
48  
49  
50  
51  
52  
53  
54  
55  
56  
57  
58  
59  
60

1  
2  
3  
4  
5  
6  
7  
8  
9  
10  
11  
12  
13  
14  
15  
16  
17  
18  
19  
20  
21  
22  
23  
24  
25  
26  
27  
28  
29  
30  
31  
32  
33  
34  
35  
36  
37  
38  
39  
40  
41  
42  
43  
44  
45  
46  
47  
48  
49  
50  
51  
52  
53  
54  
55  
56  
57  
58  
59  
60

Not specified

No specific protocol provided. Drugs used are usually muscle relaxant and barbiturate.

For peer review only

1  
2 Muscle relaxants and potassium chloride were considered the drugs with the  
3 greatest lethality, followed by barbiturates and opiates.  
4  
5  
6  
7  
8  
9  
10  
11  
12  
13  
14  
15  
16  
17  
18  
19  
20  
21

22 Not specified  
23  
24  
25  
26  
27  
28  
29  
30  
31  
32  
33  
34  
35  
36  
37  
38  
39  
40  
41  
42  
43  
44  
45  
46  
47  
48  
49  
50  
51  
52  
53  
54  
55  
56  
57  
58  
59  
60



1  
2  
3  
4  
5  
6  
7  
8  
9  
10  
11  
12  
13  
14  
15  
16  
17  
18  
19  
20  
21  
22  
23  
24  
25  
26  
27  
28  
29  
30  
31  
32  
33  
34  
35  
36  
37  
38  
39  
40  
41  
42  
43  
44  
45  
46  
47  
48  
49  
50  
51  
52  
53  
54  
55  
56  
57  
58  
59  
60

a general anaesthetic is given intravenously to induce unconsciousness, after which, if necessary, a muscle-relaxant is given which induces respiratory arrest.

Not specified

For peer review only

1  
2  
3  
4  
5  
6  
7  
8  
9  
10  
11  
12  
13  
14  
15  
16  
17  
18  
19  
20  
21  
22  
23  
24  
25  
26  
27  
28  
29  
30  
31  
32  
33  
34  
35  
36  
37  
38  
39  
40  
41  
42  
43  
44  
45  
46  
47  
48  
49  
50  
51  
52  
53  
54  
55  
56  
57  
58  
59  
60

|                                                                                                                                                                                                                                                   |
|---------------------------------------------------------------------------------------------------------------------------------------------------------------------------------------------------------------------------------------------------|
| <p>Not specified</p>                                                                                                                                                                                                                              |
| <p>The medications prescribed in lethal doses were opioids (in 75 percent of cases) and barbiturates (in 25 percent). The medications used for lethal injection were opioids (in 83 percent of cases) and potassium chloride (in 17 percent).</p> |
| <p>Not specified</p>                                                                                                                                                                                                                              |
| <p>not specified</p>                                                                                                                                                                                                                              |

1  
2  
3  
4  
5  
6  
7  
8  
9  
10  
11  
12  
13  
14  
15  
16  
17  
18  
19  
20  
21  
22  
23  
24  
25  
26  
27  
28  
29  
30  
31  
32  
33  
34  
35  
36  
37  
38  
39  
40  
41  
42  
43  
44  
45  
46  
47  
48  
49  
50  
51  
52  
53  
54  
55  
56  
57  
58  
59  
60

1. Barbiturate (thiopental)
2. Muscle relaxant (cura-like substance)

Not specified

For peer review only

1  
2 Not specified  
3  
4  
5  
6  
7  
8  
9  
10

11 Only one drug was used in 8 cases, two drugs in 5 cases and 3 drugs  
12 in 4 cases. Opioids were used in 13 cases, 11 of which pertained to  
13 morphine (as a single drug in 5 cases). Doses of morphine in the last  
14 24 hours ranged from 16 mg to 480 mg, given by various routes of  
15 administration. The most prevalent combination was opioids with IV  
16 diazepam (5 cases), in doses ranging from 10 mg to 120 mg. Insulin and  
17 penthotal were used in 2 cases. Miva-curium, potassium chloride,  
18 lidocaine, pentazolin eand lorazepam were all mentioned in 1 case  
19 each, always in association. (See Chart)  
20  
21  
22

23 Not specified  
24  
25  
26  
27  
28  
29  
30  
31  
32  
33  
34  
35  
36  
37  
38  
39  
40  
41  
42  
43  
44  
45  
46  
47  
48  
49  
50  
51  
52  
53  
54  
55  
56  
57  
58  
59  
60

1  
2  
3  
4  
5  
6  
7  
8  
9  
10  
11  
12  
13  
14  
15  
16  
17  
18  
19  
20  
21  
22  
23  
24  
25  
26  
27  
28  
29  
30  
31  
32  
33  
34  
35  
36  
37  
38  
39  
40  
41  
42  
43  
44  
45  
46  
47  
48  
49  
50  
51  
52  
53  
54  
55  
56  
57  
58  
59  
60

|               |
|---------------|
| Not specified |
| Not specified |
| Not specified |

For peer review only

1  
2 Not specified  
3  
4  
5  
6  
7  
8  
9  
10  
11  
12  
13  
14  
15  
16  
17  
18  
19  
20  
21  
22  
23  
24  
25  
26  
27  
28  
29

30 Not specified  
31  
32  
33  
34  
35  
36  
37  
38  
39  
40

41  
42 In 22 cases, 10–15 g pentobarbital was administered intravenously and  
43 caused death after a median time of 16 minutes (range 4–45minutes).  
44  
45  
46  
47  
48  
49  
50

51 Not specified  
52  
53  
54  
55  
56  
57  
58  
59  
60

1  
2 Not specified  
3  
4  
5  
6  
7  
8  
9  
10  
11  
12  
13  
14  
15  
16  
17  
18  
19  
20  
21  
22  
23  
24  
25  
26  
27  
28

29 In the vast majority of cases (78.9%), narcotics were used to end the  
30 patients' lives. In 7 cases (18.4%), barbiturates were used; in 2 cases  
31 (5.3%), benzodiazepines were used. Muscle relaxants and potassium  
32 chloride were each used in 1 case(2.6%). In 5 cases (13.2%), multiple  
33 medications were used.  
34  
35  
36  
37  
38  
39  
40  
41  
42  
43  
44  
45  
46  
47  
48  
49  
50  
51  
52  
53  
54  
55  
56  
57  
58  
59  
60

1  
2  
3  
4  
5  
6  
7  
8  
9  
10  
11  
12  
13  
14  
15  
16  
17  
18  
19  
20  
21  
22  
23  
24  
25  
26  
27  
28  
29  
30  
31  
32  
33  
34  
35  
36  
37  
38  
39  
40  
41  
42  
43  
44  
45  
46  
47  
48  
49  
50  
51  
52  
53  
54  
55  
56  
57  
58  
59  
60

No protocol specified. Medication is usually a short-acting barbiturate.

For peer review only

Not specified

Drugs used: secobarbital (66%), pentobarbital (32%), other (2%); no specification of route/dose

Between 1998 and 2000, 67 of the 70 patients (96 percent) were given a prescription for secobarbital, 2 were given a prescription for pentobarbital, and 1 was given prescriptions for other medications. In 2001, 16 of the 21 patients (76 percent) were given a prescription for secobarbital, and 5 (24 percent) were given a prescription for pentobarbital.



1  
2 The nurse administered a neuromuscular relaxant in four cases, a  
3 barbiturate in one case and opioids in nine cases.  
4  
5  
6  
7  
8  
9  
10  
11  
12  
13  
14  
15  
16  
17

18 Sodium pentothal, 2g IV, followed in some cases by muscle relaxant as soon  
19 as patient loses consciousness. All patients refused sedation prior.  
20  
21  
22  
23  
24  
25  
26

27 Not specified  
28  
29  
30  
31  
32  
33  
34  
35

36 Respondents reported honoring 32 requests for prescriptions (40% of  
37 80 requests honored), 43 requests for injections (54%), and 5  
38 nonspecific requests for either type of assistance (6%)  
39

40 Not specified  
41  
42  
43  
44  
45  
46  
47  
48  
49  
50  
51  
52  
53  
54  
55  
56  
57  
58  
59  
60

1  
2 Not specified  
3  
4  
5  
6  
7  
8  
9  
10  
11  
12  
13  
14  
15  
16  
17  
18  
19  
20  
21  
22  
23  
24  
25  
26  
27  
28  
29  
30  
31  
32  
33  
34  
35

36 Research showed that GPs did not always perform EAS in accordance  
37 with the guidelines of the Royal Dutch Pharmaceutical Association. They  
38 sometimes used less appropriate drugs (e.g. a combination of morphine  
39 and brallobarbital or insulin), dosages which were too low or  
40 administered the drugs in inappropriate ways (e.g. rectally or  
41 subcutaneously).  
42  
43  
44  
45  
46  
47  
48  
49  
50  
51  
52  
53  
54  
55  
56

57 Not specified  
58  
59  
60

|    |                                                                          |
|----|--------------------------------------------------------------------------|
| 1  |                                                                          |
| 2  | Not specified                                                            |
| 3  |                                                                          |
| 4  |                                                                          |
| 5  |                                                                          |
| 6  | Not specified                                                            |
| 7  |                                                                          |
| 8  |                                                                          |
| 9  |                                                                          |
| 10 |                                                                          |
| 11 |                                                                          |
| 12 | Not specified                                                            |
| 13 |                                                                          |
| 14 |                                                                          |
| 15 | Not specified                                                            |
| 16 |                                                                          |
| 17 |                                                                          |
| 18 |                                                                          |
| 19 |                                                                          |
| 20 |                                                                          |
| 21 |                                                                          |
| 22 |                                                                          |
| 23 |                                                                          |
| 24 |                                                                          |
| 25 | For intravenous administration, the following formula has been           |
| 26 | recommended: 100 mL of saline with 20 mg per kg of Nesdonal              |
| 27 | (Thiopental natrium) followed by 20 mg of Pavulon (Pancuronium           |
| 28 | dibromine) in 100 mL of saline. Moreover, it is preferable to bring the  |
| 29 | patient asleep with diazepam or dormicum before the euthanaticum is      |
| 30 | administered.                                                            |
| 31 |                                                                          |
| 32 |                                                                          |
| 33 |                                                                          |
| 34 |                                                                          |
| 35 |                                                                          |
| 36 |                                                                          |
| 37 |                                                                          |
| 38 |                                                                          |
| 39 | We prefer the combination of a barbiturate with a muscle relaxant:       |
| 40 | thiopental natrium 20 mg/kg (Nesdonal) in 100mL saline followed by 20 mg |
| 41 | pancuronium dibromide in 100 mL saline.                                  |
| 42 |                                                                          |
| 43 |                                                                          |
| 44 |                                                                          |
| 45 |                                                                          |
| 46 |                                                                          |
| 47 |                                                                          |
| 48 |                                                                          |
| 49 |                                                                          |
| 50 |                                                                          |
| 51 |                                                                          |
| 52 |                                                                          |
| 53 |                                                                          |
| 54 |                                                                          |
| 55 |                                                                          |
| 56 |                                                                          |
| 57 |                                                                          |
| 58 |                                                                          |
| 59 |                                                                          |
| 60 |                                                                          |

1  
2  
3  
4  
5  
6  
7  
8  
9  
10  
11  
12  
13  
14  
15  
16  
17  
18  
19  
20  
21  
22  
23  
24  
25  
26  
27  
28  
29  
30  
31  
32  
33  
34  
35  
36  
37  
38  
39  
40  
41  
42  
43  
44  
45  
46  
47  
48  
49  
50  
51  
52  
53  
54  
55  
56  
57  
58  
59  
60

Not specified

Not specified

For peer review only

1  
2 Not specified  
3  
4  
5  
6  
7  
8  
9  
10  
11  
12  
13  
14  
15  
16  
17  
18  
19  
20

21 Not specified  
22  
23  
24

25  
26 The most commonly used agents were neuromuscular working muscle  
27 relaxants (NWS). These muscle relaxants were administered in more than half  
28 of the patients (55). These were mainly alcuronium and pancuronium.  
29 Barbiturates, in particular thiopental and brallobarbitol combination  
30 preparations (brallobarbitolium compositum or Vesparax, which are  
31 combination preparations of brallobarbitol, hydroxyzine and secobarbitol),  
32 were used in almost half and opioid analgesics, especially morphine, in more  
33 than a quarter of patients (29). If only one drug was used, this involved a  
34 barbiturate half the time and opioid analgesics in 40 patients, of which three-  
35 quarters were morphine. One agent was used in 30 of the patients, in 57 two  
36 and in 13 three. The most commonly used combinations of agents were a  
37 benzodiazepine with an NWS and a barbiturate with an NWS. Most  
38 euthanatics were administered intravenously (61, of which 5 per infusion).  
39 Approximately one in five drugs were taken orally; this mainly concerned  
40 barbiturates. More than one in ten drugs were used intramuscularly; this  
41 mainly concerned NWS and opioids (34 and 42 respectively). Suppositories  
42 were little used; they contain almost exclusively barbiturates or morphine.  
43 With subcutaneous administration there was only morphine or insulin.  
44 Insulin was used less often, but still in 4 of the patients.  
45  
46  
47  
48  
49  
50  
51  
52  
53  
54  
55  
56  
57  
58  
59  
60

1  
2 One study also reported that in 30% of the cases a single drug such as  
3 a barbiturate or an opioid was used; in 57% of the cases, a  
4 combination of two drugs such as a benzodiazepine or a barbiturate  
5 with neuromuscular relaxant were used. 75% the medications were  
6 given via the parenteral route, followed by the 21% by oral route. (See  
7 Table 2)  
8  
9  
10  
11  
12  
13  
14  
15  
16  
17  
18  
19  
20  
21  
22

23 In 30% of patients a single drug was used, most frequently a barbiturate  
24 or an opioid. In 57%, a combination of 2 drugs was given, most often a  
25 benzodiazepine or a barbiturate with a neuromuscular relaxant (curare  
26 derivative). In this study, 75% of the drugs were given parenterally, 21%  
27 orally, and 3% rectally. For parenteral euthanasia, the KNMP recom-  
28 mends the administration of thiopental sodium 20 mg/kg in 10ml of  
29 saline solution intravenously to induce a coma, followed by 20mg of  
30 pancuronium bromide or vecuronium bromide, also intravenously. If an  
31 intravenous route cannot be found, an intramuscular injection of  
32 pancuronium 40mg is advised (intramuscular administration of barbitur-  
33 ates is not mentioned) (See Table II)  
34  
35  
36  
37  
38  
39  
40  
41  
42  
43  
44  
45  
46  
47  
48  
49  
50  
51  
52  
53  
54  
55  
56  
57  
58  
59  
60

1  
2 1. Sedative (barbiturate thiopental or propofol)

3 2. Muscle relaxant (not specified)

4  
5  
6 In belgium, some physicians administer heparin after injection of euthanasia  
7 drugs to improve quality of organs. Not done in Netherlands.  
8  
9  
10  
11  
12  
13  
14  
15  
16  
17  
18  
19  
20  
21  
22  
23  
24  
25  
26  
27  
28  
29  
30  
31  
32  
33  
34

35  
36 Not specified  
37  
38  
39  
40  
41  
42  
43  
44  
45

46 Pure pentobarbital was a commonly used lethal drug until it became  
47 unavailable in 2012. Secobarbital use accounted for 580 (58.5%) deaths.  
48  
49  
50  
51  
52  
53  
54  
55  
56  
57  
58  
59  
60

1. anxiolytic: Lorazepam 2.5 to 5 mg IV slow or sublinguale or Midazolam 2 to 3 mg in IV or SC, to induce sedation prior to the act, if the patient wishes
2. barbiturate: Thiopental 1 to 2 g IV (IM or SC injections painful), intended to induce a coma.
3. curare: After loss of consciousness and if death is not not already occurred, IV injection of 20 mg Pancuronium, inducing muscle hypotonia and thus depression breathing.

No specific protocol provided. Mentions the use of sodium pentobarbital.



1  
2  
3  
4  
5  
6  
7  
8  
9  
10  
11  
12  
13  
14  
15  
16  
17  
18  
19  
20  
21  
22  
23  
24  
25  
26  
27  
28  
29  
30  
31  
32  
33  
34  
35  
36  
37  
38  
39  
40  
41  
42  
43  
44  
45  
46  
47  
48  
49  
50  
51  
52  
53  
54  
55  
56  
57  
58  
59  
60

|               |
|---------------|
| Not specified |
| Not specified |

For peer review only

1  
2 No specific protocol provided. Options include:

- 3 - Muscle relaxant alone  
4 - muscle relaxant and barbiturate  
5 - Muscle relaxant and drug other than barbiturate  
6 - Barbiturate alone  
7 - Barbiturate and drug other than muscle relaxant  
8 - Opioid alone  
9 - Opioid and drug other than muscle relaxant and barbiturate  
10 - Benzodiazepine alone

11 See Table 4 for more detail  
12  
13  
14  
15  
16  
17  
18  
19  
20  
21  
22  
23  
24  
25  
26  
27  
28  
29  
30  
31  
32  
33  
34

35  
36 Not specified  
37  
38  
39  
40  
41  
42  
43  
44  
45  
46  
47  
48  
49  
50  
51  
52  
53  
54  
55  
56  
57  
58  
59  
60

1  
2  
3  
4  
5  
6  
7  
8  
9  
10  
11  
12  
13  
14  
15  
16  
17  
18  
19  
20  
21  
22  
23  
24  
25  
26  
27  
28  
29  
30  
31  
32  
33  
34  
35  
36  
37  
38  
39  
40  
41  
42  
43  
44  
45  
46  
47  
48  
49  
50  
51  
52  
53  
54  
55  
56  
57  
58  
59  
60

The categories of drugs listed include in previous publications include barbiturates, benzodiazepines, other sedative/hypnotic agents, and opioid analgesics. Estimates of the lethal dose of phenobarbital vary from 1.5g to 9g. Benzodiazepines have been used at varying doses. Other drugs that have been used include glutethimide (lethal dose 10 - 20 g), chloral hydrate (lethal dose 35 - 40 g), meprobamate and methyprylon (toxic dose variable, as little as 12g). Opioid analgesics account for one-fourth of the drugs listed in Final Exit, and have also been used at varying doses. Orphenadrine has also been used, with lethal doses from 2-3 g. It is also recommended that alcohol be ingested with many of these drugs listed.

Not specified

For peer review only

Not specified

1  
2 Not specified  
3  
4  
5  
6  
7  
8  
9  
10  
11  
12  
13  
14  
15  
16  
17  
18  
19  
20  
21

22 Options include:

- 23 - Thiopental 1-2 g or similar IV alone
- 24 - Thiopental 1-2 g + paralyzing neuromuscular relaxant
- 25 - Thiopental 1-2 g + neuromuscular relaxant + KCL
- 26 - Other inducers of unconsciousness + crippling neuromuscular blocker
- 27 - Morphine alone or with sedatives

28 Neuromuscular relaxant is usually 20 mg Pavulon or Norcuron®  
29 or 50 mg of Tracrium  
30  
31  
32

33 Not specified  
34  
35  
36  
37  
38  
39  
40  
41  
42

43 Intravenous bolus of barbiturate and curare are given to the patient.  
44 Following sedation of the patient with a barbiturate induction agent, the  
45 patient is given a drug that causes muscular paralysis. Occasionally,  
46 doctors also give a large intravenous dose of diazepam.  
47  
48

49 Not specified  
50  
51  
52  
53  
54  
55  
56  
57  
58  
59  
60

1  
2  
3  
4  
5  
6  
7  
8  
9  
10  
11  
12  
13  
14  
15  
16  
17  
18  
19  
20  
21  
22  
23  
24  
25  
26  
27  
28  
29  
30  
31  
32  
33  
34  
35  
36  
37  
38  
39  
40  
41  
42  
43  
44  
45  
46  
47  
48  
49  
50  
51  
52  
53  
54  
55  
56  
57  
58  
59  
60

Not specified

Not specified

For peer review only

1  
2 Administration of the barbiturate thiopental whether or not followed by  
3 one muscle relaxation. One benzodiazepine (diazepam or midazolam, 9  
4 times), one opioid (sufentanil or fentanyl, 3 times) or an an  
5 estheticum (propofol; 2 times), whether or not combined with a  
6 barbiturate and / or followed by a muscle relaxant. 1500 mg of thiopental-  
7 sodium can be dissolved in 10 mL of saline or water. Thiopental and muscle  
8 relaxation should be prepared beforehand in separate syringes with  
9 different needles to prevent precipitation in the syringe. The  
10 administration then takes place in succession, the muscle relaxant is  
11 only given when the coma has started. If administration takes place via  
12 a running infusion, let the infusion run through the injections. The time  
13 course between the intravenous injection and death is short in most  
14 patients. A few times propofol, an anesthetic agent, as well as  
15 thiopental can induce a coma when used.  
16  
17  
18  
19  
20  
21  
22  
23  
24  
25

26 Not specified  
27  
28  
29  
30  
31  
32  
33  
34  
35  
36  
37  
38  
39  
40  
41  
42  
43  
44  
45  
46  
47  
48  
49  
50  
51  
52  
53  
54  
55  
56  
57  
58  
59  
60

1  
2 Not specified  
3  
4  
5  
6  
7

8 For parenteral use: Induce coma through intravenous injection of 1g (or 1.5-  
9 2g) of thiopental or pentobarbital, followed by intravenous injection of 45g of  
10 alcuronium or 18mg of pancuronium. (See table 1) Further recommendatons  
11 from the 1994 Admiraal report: The intravenous route should be preferred,  
12 due to its effectiveness and reliability, using 1-2 grams of sodium pentothal in  
13 10 ml of saline solution, followed by an intravenous muscle relaxant such as  
14 20 mg pancuronium dibromide or vecuronium bromide.  
15  
16  
17  
18  
19  
20  
21  
22  
23  
24  
25  
26  
27  
28  
29  
30  
31  
32  
33  
34  
35  
36  
37  
38  
39  
40  
41  
42  
43  
44  
45  
46  
47  
48  
49  
50  
51  
52  
53  
54  
55  
56  
57  
58  
59  
60

- 1
  - 2
  - 3
  - 4
  - 5
  - 6
  - 7
  - 8
  - 9
  - 10
  - 11
  - 12
  - 13
  - 14
  - 15
  - 16
  - 17
  - 18
  - 19
  - 20
  - 21
  - 22
  - 23
  - 24
  - 25
  - 26
  - 27
  - 28
  - 29
  - 30
  - 31
  - 32
  - 33
  - 34
  - 35
  - 36
  - 37
  - 38
  - 39
  - 40
  - 41
  - 42
  - 43
  - 44
  - 45
  - 46
  - 47
  - 48
  - 49
  - 50
  - 51
  - 52
  - 53
  - 54
  - 55
  - 56
  - 57
  - 58
  - 59
  - 60
1. Midazolam 30 mg IV
2. Thiopentone 1.4 g IV

98% of cases use thiopental:

- Thiopental 1500-2000 mg IV, with or without muscle relaxant (with in 92.6% of cases). Thiopental doses range from <1000 to >2000 mg, but the majority of cases use 1500-2000 mg.

- Midazolam often used as premedication

See Table 1 for more detail



1  
2 The most frequently dispensed drugs were the combination of muscle  
3 relax-ants and barbiturates (community pharmacy 47%, hospital pharmacy  
4 72%), barbiturates only (community pharmacy 19%, hospital pharmacy  
5 6%), and the combination of muscle relaxants and  
6 benzodiazepines (community pharmacy 14%, hospital pharmacy 7%). (See  
7 Table 4)  
8  
9

10 Not specified  
11  
12  
13  
14  
15  
16  
17  
18  
19  
20  
21  
22  
23  
24  
25  
26  
27  
28  
29  
30  
31  
32  
33  
34  
35  
36  
37  
38  
39  
40  
41  
42  
43

44 Prior administration of lorazepam or midazolam will be based on the  
45 patient's expectations. Recommended drugs Lorazepam (Témesta®) 2,5 to 5  
46 mg IV slow or sublingual Midazolam (Dormicum®) 2 to 3 mg SC or IV. The  
47 recommended attitude is injection intravenous injection of 1 to 2 g of  
48 pentobarbital or thiopental, followed by an injection of 20 mg of dibromide  
49 pancuronium, after the patient has lost consciousness  
50  
51  
52  
53  
54  
55  
56  
57  
58  
59  
60

1  
2  
3  
4  
5  
6  
7  
8  
9  
10  
11  
12  
13  
14  
15  
16  
17  
18  
19  
20  
21  
22  
23  
24  
25  
26  
27  
28  
29  
30  
31  
32  
33  
34  
35  
36  
37  
38  
39  
40  
41  
42  
43  
44  
45  
46  
47  
48  
49  
50  
51  
52  
53  
54  
55  
56  
57  
58  
59  
60

Not specified

Not specified

The drugs used were mostly opioids and/or benzodiazepines.

For peer review only

1  
2 No specific protocol provided. For 60% of patients, terminal sedation was  
3 performed by administering benzodiazepines (sometimes combined with  
4 morphine) and in most remaining patients by administering morphine only.  
5 For 94% of patients, euthanasia was performed by administering  
6 neuromuscular relaxants or barbiturates.  
7  
8  
9  
10  
11  
12  
13  
14  
15  
16  
17  
18  
19  
20  
21  
22  
23  
24  
25  
26  
27  
28  
29  
30  
31  
32  
33  
34

35  
36 Physicians used drugs that are advised by the Royal Dutch Association  
37 for the advancement of Pharmacy, that is, a barbiturate followed by a  
38 muscle-relaxant for euthanasia or barbiturates for physician-assisted  
39 suicide. In most of the cases of euthanasia or physician-assisted suicide,  
40 life was ended with drugs that are recommended by guidelines, that is,  
41 muscle relaxants and/or barbiturates. Opioids were used in 27% of the  
42 cases in 1995, 22% of the cases in 2001, and 16% of the cases in 2005  
43 (no comparable data available from 1990). (See Table 4)  
44  
45  
46

47 Not specified  
48  
49  
50  
51  
52  
53  
54  
55  
56  
57  
58  
59  
60

1  
2 Not specified  
3  
4  
5  
6  
7  
8  
9  
10  
11  
12  
13  
14  
15  
16  
17  
18  
19  
20  
21  
22  
23  
24  
25  
26  
27  
28  
29  
30  
31  
32  
33  
34  
35

36 No specific protocol provided; Options include:

- 37 - Barbiturate alone (34.3% of cases)
  - 38 - Barbiturate + neuromuscular relaxant (58.1%)
  - 39 - Morphine alone or in conjunction with sedative (0.9%)
- 40  
41  
42  
43  
44  
45  
46  
47  
48  
49  
50  
51  
52  
53  
54  
55  
56  
57  
58  
59  
60

1  
2 No specific protocol provided. Options include:

- 3 - Barbiturate, neuromuscular relaxant, or both (used mainly in cases reported  
4 to review committee)  
5  
6 - Opioids, alone or in conjunction with benzodiazepine (used mainly in cases  
7 not reported to review committee)

8 See Table 3 for details about medications used. Medication route not  
9 specified.  
10  
11  
12  
13  
14  
15  
16  
17  
18  
19  
20  
21  
22  
23  
24  
25  
26  
27  
28  
29  
30  
31  
32  
33  
34

35 Protocols include:

- 36 - Benzodiazepine (IV 1 dose) + barbiturate (IV continuous) + narcotic  
37 antagonist (IV continuous)  
38  
39 - Barbiturate (SCC) + neuromuscular relaxant (IV continuous)  
40  
41 - Barbiturate (IV 1 dose) + neuromuscular relaxant (IV 1 dose)  
42  
43 - Benzodiazepine (IV 1 dose) + barbiturate (IV 1 dose) + neuromuscular  
44 relaxant (IV 1 dose)  
45  
46 - Opioid (SCC) + benzodiazepine (SCC) + barbiturate (IV 1 dose)  
47  
48 - Barbiturate (IV 1 dose) + neuromuscular relaxant (IV 1 dose)  
49  
50 - Opioid (TD continuous) + opioid (IV with intervals) + barbiturate (IV  
51 continuous)

52 (See Table 3 for complete list)  
53  
54  
55  
56  
57  
58  
59  
60

1  
2 No specific protocol provided. Options include:

- 3 1. Thiopental (dose range 1000 mg to 2000 mg or 20 mg/kg bodyweight)  
4 followed by muscle relaxant (pancuronium or vecuronium)  
5  
6 2. Thiopental alone (20 mg/kg bodyweight)  
7  
8  
9  
10  
11  
12  
13  
14  
15  
16  
17  
18  
19  
20  
21  
22

23 Protocol not specified. Main life-ending drug: sodium thiopental.  
24  
25  
26  
27  
28  
29  
30  
31  
32  
33  
34  
35  
36  
37  
38  
39  
40  
41  
42  
43  
44  
45  
46  
47  
48  
49  
50  
51  
52  
53  
54  
55  
56  
57  
58  
59  
60

1  
2  
3  
4  
5  
6  
7  
8  
9  
10  
11  
12  
13  
14  
15  
16  
17  
18  
19  
20  
21  
22  
23  
24  
25  
26  
27  
28  
29  
30  
31  
32  
33  
34  
35  
36  
37  
38  
39  
40  
41  
42  
43  
44  
45  
46  
47  
48  
49  
50  
51  
52  
53  
54  
55  
56  
57  
58  
59  
60

Not specified

Not specified

For peer review only

1  
2 No protocol specified. Medication is barbiturates and/or muscle relaxants in  
3 73.9% of cases. Morphine or morphine-like agents used in 16.2%. Route of  
4 administration not specified.  
5  
6  
7  
8  
9  
10  
11  
12  
13  
14  
15  
16  
17  
18  
19  
20  
21  
22  
23  
24  
25  
26  
27  
28  
29  
30  
31  
32  
33  
34  
35  
36  
37  
38  
39  
40  
41  
42  
43  
44  
45  
46  
47  
48  
49  
50  
51  
52  
53  
54  
55  
56  
57  
58  
59  
60

For peer review only



1  
2 No specific protocol provided. Drugs administered could have been  
3 neuromuscular relaxants, in any combination; barbiturates, alone or in  
4 combination with other drugs except neuromuscular relaxants; opioids, alone  
5 or in combination with other drugs except neuromuscular relaxants and  
6 barbiturates; benzodiazepines, alone or in combination with other drugs  
7 except neuromuscular  
8 relaxants, barbiturates, and opioids; or other drugs, in any combination. (See  
9 Table 3 for complete breakdown of drugs used)  
10  
11  
12  
13  
14  
15  
16  
17  
18  
19  
20  
21  
22  
23  
24  
25  
26  
27  
28  
29  
30  
31  
32  
33  
34  
35  
36  
37  
38  
39  
40  
41  
42  
43  
44  
45  
46  
47  
48  
49  
50  
51  
52  
53  
54  
55  
56  
57  
58  
59  
60

For peer review only

1  
2 No specific protocol provided. Medications included:

- 3 1. Medazolam (subcutaneous or supplemented with sublingual lorazepam)  
4 30 to 120 mg per 24 hours, mean dosage 60 mg per 24 hours. Sometimes  
5 combined with haloperidol or levomepromazine.  
6  
7 2. Barbiturate (unspecified)  
8  
9 3. Muscle relaxant (unspecified)  
10  
11  
12  
13  
14  
15  
16  
17  
18  
19  
20  
21  
22  
23  
24  
25  
26  
27  
28  
29  
30  
31  
32  
33  
34  
35  
36  
37  
38  
39  
40  
41  
42  
43  
44  
45  
46  
47  
48  
49  
50  
51  
52  
53  
54  
55  
56  
57  
58  
59  
60

1  
2  
3  
4  
5  
6  
7  
8  
9  
10  
11  
12  
13  
14  
15  
16  
17  
18  
19  
20  
21  
22  
23  
24  
25  
26  
27  
28  
29  
30  
31  
32  
33  
34  
35  
36  
37  
38  
39  
40  
41  
42  
43  
44  
45  
46  
47  
48  
49  
50  
51  
52  
53  
54  
55  
56  
57  
58  
59  
60

Not specified

Not specified

Barbiturates, lethal dose. No specific protocol provided. IV only used if patient cannot swallow medications

For peer review only

1  
2 midazolam \_\_\_\_\_ mg (usual range 2.5 – 10 mg) IV over 2 minutes  
3 Comment: To be administered and documented by physician/NP only.  
4 Step 2 (choose one option) lidocaine (without epinephrine) 40 mg IV  
5 over 30 seconds  
6  
7 Comment: To be administered and documented by physician/NP only.  
8 OR if true allergy to lidocaine  
9  
10 magnesium sulphate 1000 mg IV over 5 minutes by slow IV  
11 injection Comment: To be administered and documented by  
12 physician/NP only. Mixing instructions: Dilute 2 mL of the 500 mg/mL  
13 solution to a final volume of 10 mL with NaCl 0.9%  
14  
15 Step 3 (choose one option)  
16 propofol 1000 mg IV by slow IV injection Comment: To be administered  
17 and documented by physician/NP only. Instructions: Use 4 x 30 mL  
18 syringes containing 250 mg each (delivered over 2.5 min per syringe)  
19 OR when propofol is not acceptable (availability of IV barbiturates has  
20 been inconsistent):  
21  
22 PHENobarbital 3000 mg IV over 5 minutes by slow IV injection with an  
23 additional dose PRN Comment: To be administered and documented  
24 by physician/NP only. Mixing instructions: Dilute 25 mL of the 120  
25 mg/mL solution to a final volume 50 mL with NaCl 0.9%.  
26  
27 Step 4 (choose one option)  
28 rocuronium 200 mg IV by rapid injection (30 sec), promptly once coma  
29 is verified. Comment: To be administered and documented by  
30 physician/NP only. Instructions: Use 20 mL of the 10 mg/mL solution  
31  
32  
33  
34  
35  
36  
37  
38  
39  
40  
41  
42  
43  
44  
45  
46  
47  
48  
49  
50  
51  
52  
53  
54  
55  
56  
57  
58  
59  
60

1  
2 1 ampoule of lidocaine (10 mg/ml, 10 ml) 4 vials of thiopental à 500 mg  
3  
4 2 ampoules of water for injections (à 10 ml) or 1 ampoule of water for  
5 injections (à 20 ml) 2 ampoules of sodium chloride solution 0.9% (à 10  
6 ml) 3 vials of rocuronium 50 mg (10mg/ml, 5 ml)  
7

8 Optional use of elistimarc pump for administration of thiopental (done  
9 over 5 minutes) or by IV infusion over 5 minutes Optional propofol 20  
10 mg/mL, 50 mL, total 1000 mg. Can also be administered as an infusion  
11  
12  
13  
14  
15  
16  
17  
18  
19  
20  
21  
22  
23  
24  
25  
26  
27  
28  
29  
30  
31  
32  
33  
34  
35

36 No specific protocol provided. Protocols included:

- 37 - Thiopental or medazolam followed by curare
- 38 - Thiopental or medazolam followed by potassium chloride
- 39 - thiopental or medazolam followed by potassium chloride and curare
- 40 - thiopental or medazolam alone
- 41 - Dispensed 'euthanasia kit': midazolam 50mg/10mL, thiopental 1 g,  
42 vecuronium 10 mg  
43  
44  
45  
46  
47  
48  
49  
50  
51  
52  
53  
54  
55  
56  
57  
58  
59  
60

1  
2 Lidocaine without epinephrine 40 mg (2mL x 20 mg/mL)  
3 infused over 30 seconds  
4 Propofol 1000mg (2 x 500mg doses of 50 mL x 10mg/mL)  
5 Total dose of 1000 mg (100 mL total) by slow IV injection (5 minutes) using 2  
6 syringes containing 500 mg (50 mL)  
7 Shake before use. Do not refrigerate.  
8 Consider ordering a second dose in each kit, if there are any concerns about  
9 coma induction for the patient.  
10  
11 Cisatracurium besylate 40mg (20 mL x 2 mg/mL)  
12 Give by rapid IV.  
13 NaCl 0.9% - 4 x 10mL  
14 Syringes (for flushing lines)  
15 Midazolam 10mg (10mL x 1mg/mL)  
16 Give 2.5 to 10 mg (2.5 to 10 mL) IV over 2 minutes.  
17 To be titrated based on the patient's response  
18 two kits Inform the patient and anyone present that the injection might be  
19 painful and that there is a risk of losing venous access  
20 Inject 10 mL of NaCl 0.9% and make sure the catheter is inserted correctly  
21 and is patent  
22 Inject 2.5 mg (2.5 mL) of midazolam over 2 minutes to obtain anxiolysis;  
23 titrate up to 10 mg (10 mL) based on patient response  
24 Inject 2 mL of parenteral lidocaine without epinephrine over 30 seconds  
25 The protocol provides for the injection of 100 mL of propofol (2 x 50 mL  
26 syringes). However, if this is not enough to induce a deep coma, the dose  
27 must be increased. Inject the propofol over 5 minutes (2.5 minutes per  
28 syringe)  
29  
30  
31  
32  
33  
34  
35  
36  
37  
38  
39  
40  
41  
42  
43  
44  
45  
46  
47  
48  
49  
50  
51  
52  
53  
54  
55  
56  
57  
58  
59  
60

1  
2 o Midazolam 10mg (1mg/mL = 10mL). Use 10mL syringe. Label as  
3 Syringe A: midazolam For deep sedation/coma Inject over 10 seconds  
4  
5 o Lidocaine 2% 100mg (20mg/mL = 5 mL). Use 5mL syringe. Label as  
6 Syringe B: lidocaine Necessary for peripheral venous access only For  
7 reduction of discomfort on injection of propofol  
8  
9 Inject over 5 seconds  
10  
11 o Propofol 1000mg (10mg/mL = 100mL). Use two 50mL syringes.  
12 Label as Syringe C: propofol and Syringe D: propofol For induction of  
13 coma, myocardial depression, respiratory depression, and vasoplegia  
14 Consider advising those who are present that after the injection is  
15 completed an assessment of awareness will be completed. Inject each  
16 syringe continuously and promptly over 30 seconds After completing  
17 the injectios, check eyelash reflex and whether there is any response  
18 to verbal stimulus. If there is no response to stimuli then proceed to  
19 injection of rocuronium.  
20  
21 o Rocuronium 200mg (10mg/mL = 20mL). Use 20mL syringe. Label  
22 as Syringe E: rocuronium For muscle paralysis Consider advising those  
23 who are present that cardiac arrest can occur up to 20 minutes after  
24 respiratory arrest has occurred. In other words, the patient's heart may  
25 continue to beat for some time after the procedure is complete.  
26  
27 Inject promptly over 5 seconds  
28  
29 Rocuronium should always be administered after propofol, even if  
30 respiratory and/or cardiac arrest has already occurred with propofol  
31 alone  
32  
33  
34  
35  
36 Midazolam 10 mg in a 20 mL syringe over 5-10 seconds, then wait 3-5  
37 minutes, lidocaine 1% 60 mg in a 10 mL syringe over 5-10 seconds, then wait  
38 10-15 seconds, propofol 1000 mg in two 50 mL syringes then wait 35-45  
39 seconds, rocuronium 200 mg in a 30 mL syringe over 5-10 seconds then wait  
40 10-15 seconds, bupivacane 0.5% 400 mg in 2 40 mL syringes over 30-60  
41 seconds,  
42  
43  
44  
45  
46  
47  
48  
49 Flush 3-5CC  
50 Versed 10mg  
51 Flush 3-5CC  
52 Lidocaine 40mg (I don't give this sometimes if they are sleeping already)  
53 Propofol 1000mg  
54 Flush 3-5cc  
55 Rocuronium 200mg  
56 Flush 10cc.  
57  
58  
59 2 kits  
60

1  
2 midazolam 2.5-10 mg IV titrated, lidocaine 2% without epinephrine 40 mg IV,  
3 propofol 10 mg/mL 1000 mg IV, cisatracurium 2 mg/mL 40 mg IV, NaCl 0.9%  
4 flush  
5  
6  
7  
8

9 Flush injection device with 10 mL 0.9% sodium chloride to assess catheter  
10 patency  
11

12 **STEP ONE: Anxiolytic**

13 Midazolam 1 mg/mL

14 10 mL vial x 1

15 **10 mg (10 mL) IV undiluted over 2 minutes**

16 Draw up 10 mg (10 mL) into 20 mL syringe. Administer dose IV over 2  
17 minutes.  
18

19 Depending on sensitivity to benzodiazepines, patient may remain awake or  
20 lose consciousness.  
21

22 **STEP TWO: Local Anesthetic (MUST Choose one)**

23

24 Lidocaine 2% (20 mg/mL) without epinephrine *\*first line*

25 2 mL amp x 1

26 **40 mg (2 mL) undiluted IV over 30 seconds**

27 To decrease pain associated with injection of coma-inducing agent

28

29 Magnesium sulphate 20% (200 mg/mL) *\*second line if allergic to Lidocaine*

30 10 mL vial x 1  
31  
32

33 **1000 mg IV over 5 minutes**

34 Draw up 1000 mg (5 mL) Magnesium sulphate 20% into 20 mL syringe and  
35 further dilute to 10 mL with 0.9% sodium chloride. Administer IV over 5  
36 minutes  
37  
38

39 Midazolam 5 mg/mL 2 x 20 mg in syringe, 20 mg slow IV over 4 minutes,  
40 repeat if requires. local anesthetic lidocaine without epic 20 mg/mL 1x40 mg  
41 in a syringe over 30 seconds; if allergy to lidocaine magnesium sulphate 500  
42 mg/mL 100 mg slow IV over 5 minutes. propofol 10 mg/mL 8x250 mg, 1000  
43 mg each syringe slow over 1.5 minutes, administer second dose if required  
44 OR phenobarbital 120 mg/mL 2x3000 mg, 3000 mg slow over 5 minutes  
45 (diluted), administer second dose if required; rocuronium 200 mg rapid IV or  
46 cisatracurium 30 mg rapid IV  
47  
48  
49  
50  
51  
52  
53  
54  
55  
56  
57  
58  
59  
60



1  
2 Midazolam 10 mg IV Lidocaine 60 mg IV per each peripheral IV line to be  
3 used, propofol 1000 mg IV, rocuronium 200 mg IV, bupivacaine 400 mg IV, to  
4 be prepared as 2 maid kits  
5  
6  
7  
8

9 18-20 G catheter in place  
10

11 NaCl 0.9% - 10 mg IV (establish catheter patency)  
12

13 Midazolam 10 mg (10 ml) over 2 minutes  
14

15 Lidocaine 40 mg (2 ml) IV over 30 seconds  
16

17 Propofol 1000 mg (100 ml) over 5 minutes. Shake before use and do not  
18 refrigerate  
19

20 NaCl 0.9% - 2 x 10 ml IV  
21

22 Rocuronium bromide 200 mg (20 ml) by rapid IV  
23  
24  
25  
26  
27  
28

29 1. Anxiolytic: midazolam(1 mg/mL) 10mg x 2; 2.5 mg to 10 mg IV over 2  
30 minutes. May repeat additional dose x 1 PRN. Midazolam1 mg/mL is  
31 preferred formulation.  
32

33 2. Local Anaesthetic: lidocaine(20 mg/mL) 40 mg; 40mg IV over 30 seconds/  
34 Lidocaine 20 mg/mL is preferred formulation.  
35

36 3. COMA Inducing Agent (CHOOSE one of the two alternatives. Initial to  
37 indicate selected agent.): propofol(10 mg/mL) 1 g x 1; 1 g IV over 5 minutes.  
38 May repeat additional dose x 1 PRN. (1st line agent). Obtain additional PRN  
39 from back-up IV kit, if required. OR phenobarbital(120 mg/mL) 3 g x 1, sodium  
40 chloride 0.9% 10 mL x 3 for injection (for dilution), 3 g (dilute to 50 mL with  
41 sodium chloride 0.9%) IV over 5 minutes. May repeat additional dose x 1  
42 PRN. (2nd line agent). phenobarbital 120 mg/mL is preferred formulation.  
43

44 4. Neuromuscular Blocker: rocuronium(10 mg/mL) 200mg; 200 mg by rapid IV  
45 injection. Confirm deep medically-induced coma before administration. 5.  
46 IV Line Flush Solution sodium chloride 0.9% solution 10 mL x 6 Flush IV line  
47 after each medication to ensure entire dose is given AND to avoid  
48 incompatibilities.  
49  
50  
51  
52  
53  
54  
55  
56  
57  
58  
59  
60

**1. Anxiolytic**

midazolam 2.5 – 10 mg IV over 2 minutes (Dispense: 10 mg)

**2. OPTIONAL – Opioids (Choose only one option depending on provider preference and/or availability) Triplicate prescriptions must be utilized in the community setting.**

fentaNYL \_\_\_\_\_ mcg IV over 1 – 2 minutes (dose range 25 – 500 mcg) (Dispense: \_\_\_\_\_ mcg)  SUFentanil \_\_\_\_\_ mcg IV over 1 – 2 minutes (dose range 10 – 50 mcg) (Dispense: \_\_\_\_\_

Midazolam 1 mg/mL 10 mg IV once lidocaine 20 mg/mL 100 mg IV once, propofol 10 mg/mL 750 mg IV once, then 250 mg IV over 10 minutes, rocuronium 10 mg/mL 300 mg IV once.

Lidocaine 2% 1-1.5 ml

Midazolam 10 mg

PPF 500mg

Rocuronium 200 mg

PPF 500 mg

1  
2 ANXIOLYSIS

3 Benzodiazepine

4 Total quantity (to be divided between 2 kits)

5 Dosage

6 Notes

7 Physician's initials (1)

8 Midazolam 1 mg/mL

9 2 x 10 mg (10 mL) in a syringe

10 2.5 to 10 mg (2.5 to 10 mL) IV over 2 minutes

11 To be titrated based on patient response

12  
13  
14  
15  
16  
17 COMA INDUCTION

18 Select ONE local anesthetic:

19  
20  
21 Local anesthetic

22 Total quantity (to be divided between 2 kits)

23 Dosage

24 Notes

25 Physician's initials (1)

26 Lidocaine without epinephrine 20 mg/mL

27 2 x 40 mg (2 mL) in a syringe

28 40 mg (2 mL) IV over 30 seconds

29 1st line

30  
31  
32  
33  
34  
35  
36 Midazolam 1 mg/mL

37 Dispense: 1 x 10 mL vial Directions: 2.5-10 mg (2.5 – 10 mL) IV over 2  
38 minutes

39 Lidocaine 2% (20 mg/mL) without epinephrine

40 Dispense: 1 x 5 mL vial Directions: 40 mg (2 mL) IV over 30 seconds

41 OR (if allergic to lidocaine): OR

42 Magnesium sulfate 500 mg/mL

43 Dispense: 1 x 10 mL vial Directions: 1000 mg (2 mL) (dilute to 10 mL with NaCl  
44 0.9%) by slow IV injection over 5 minutes

45 Propofol 10 mg/mL

46 Dispense: 2 x 50 mL bottles Directions: 1000 mg (100 mL) by slow IV injection.  
47 Use 2 syringes containing 500 mg (50 mL).

48 OR

49 Phenobarbital 120 mg/mL

50 Dispense: 25 X 1 mL ampoules

51 Directions: 3000 mg (25 mL) (dilute to 50 mL with NaCl 0.9%) by slow IV  
52 injection over 5 minutes, with an additional dose prn

53 Rocuronium bromide (10 mg/mL)

54 Dispense: 4 x 5 mL vials Directions: 200 mg (20 mL) by rapid IV

55 Cisatracurium besylate 2 mg/mL

56 Dispense: 2 x 10 mL vials Directions: 30 mg (15 mL) by rapid IV flush with 10

1  
2  
3  
4  
5  
6  
7  
8  
9  
10  
11  
12  
13  
14  
15  
16  
17  
18  
19  
20  
21  
22  
23  
24  
25  
26  
27  
28  
29  
30  
31  
32  
33  
34  
35  
36  
37  
38  
39  
40  
41  
42  
43  
44  
45  
46  
47  
48  
49  
50  
51  
52  
53  
54  
55  
56  
57  
58  
59  
60

|               |
|---------------|
| Not specified |
| Not specified |
| Not specified |

For peer review only

1  
2  
3  
4  
5  
6  
7  
8  
9  
10  
11  
12  
13  
14  
15  
16  
17  
18  
19  
20  
21  
22  
23  
24  
25  
26  
27  
28  
29  
30  
31  
32  
33  
34  
35  
36  
37  
38  
39  
40  
41  
42  
43  
44  
45  
46  
47  
48  
49  
50  
51  
52  
53  
54  
55  
56  
57  
58  
59  
60

Not specified

Not specified

For peer review only

1  
2  
3  
4  
5  
6  
7  
8  
9  
10  
11  
12  
13  
14  
15  
16  
17  
18  
19  
20  
21  
22  
23  
24  
25  
26  
27  
28  
29  
30  
31  
32  
33  
34  
35  
36  
37  
38  
39  
40  
41  
42  
43  
44  
45  
46  
47  
48  
49  
50  
51  
52  
53  
54  
55  
56  
57  
58  
59  
60

Not specified

Not specified

Not specified

For peer review only

1  
2  
3  
4  
5  
6  
7  
8  
9  
10  
11  
12  
13  
14  
15  
16  
17  
18  
19  
20  
21  
22  
23  
24  
25  
26  
27  
28  
29  
30  
31  
32  
33  
34  
35  
36  
37  
38  
39  
40  
41  
42  
43  
44  
45  
46  
47  
48  
49  
50  
51  
52  
53  
54  
55  
56  
57  
58  
59  
60

Not specified

Not specified

For peer review only

1  
2  
3  
4  
5  
6  
7  
8  
9  
10  
11  
12  
13  
14  
15  
16  
17  
18  
19  
20  
21  
22  
23  
24  
25  
26  
27  
28  
29  
30  
31  
32  
33  
34  
35  
36  
37  
38  
39  
40  
41  
42  
43  
44  
45  
46  
47  
48  
49  
50  
51  
52  
53  
54  
55  
56  
57  
58  
59  
60

Not specified

Not specified

For peer review only



1  
2 No specific protocol described.

3 Netherlands: Barbiturates followed by muscle relaxant, or high-dose opioids  
4  
5  
6  
7  
8  
9  
10  
11  
12  
13  
14  
15  
16  
17  
18  
19  
20

21 Not specified  
22  
23  
24  
25  
26  
27  
28  
29  
30  
31  
32  
33  
34  
35  
36  
37  
38  
39  
40  
41  
42  
43  
44  
45  
46  
47

48 Lidocaína 120 mg -Deje transcurrir 10 segundos\*Midazolam 60 mg -  
49 Deje transcurrir 30 segundos\*Fentanyl 1500 mcg -Deje transcurrir 40  
50 segundos\*Propofol 1200 mg o Tiopental sódico 1800 mg -Deje  
51 transcurrir 40 segundos \*Vecuronio 60 mg -Deje transcurrir 90  
52 segundos  
53  
54  
55  
56  
57  
58  
59  
60

1  
2 Not specified  
3  
4  
5  
6  
7  
8  
9  
10  
11  
12  
13  
14  
15  
16  
17  
18  
19  
20  
21  
22  
23  
24  
25

26 No specific protocol: drugs used included neuromuscular relaxants,  
27 barbiturates, benzodiazepines and opioids.  
28  
29  
30  
31  
32  
33  
34  
35  
36  
37  
38  
39  
40

41 Not specified  
42  
43  
44  
45  
46  
47  
48  
49  
50  
51  
52  
53  
54  
55  
56  
57  
58  
59  
60

1  
2  
3  
4  
5  
6  
7  
8  
9  
10  
11  
12  
13  
14  
15  
16  
17  
18  
19  
20  
21  
22  
23  
24  
25  
26  
27  
28  
29  
30  
31  
32  
33  
34  
35  
36  
37  
38  
39  
40  
41  
42  
43  
44  
45  
46  
47  
48  
49  
50  
51  
52  
53  
54  
55  
56  
57  
58  
59  
60

26 patients received prescriptions for a dose of secobarbital that was 9 g or more, usually in conjunction with antiemetic agents; one patient received a prescription for 6 g of phenobarbital.

Not specified

For peer review only

1  
2 Not specified  
3  
4  
5  
6  
7  
8  
9  
10  
11  
12  
13  
14  
15  
16  
17  
18  
19  
20  
21  
22  
23  
24  
25  
26  
27  
28  
29  
30  
31  
32  
33  
34  
35

36 Line flushed with 10ml NS

37 Midazolam mg = ml of 1mg/ml, push

38 Line flushed with 10ml NS

39 Lidocaine 40mg = 2ml of 2%, push over 30 seconds

40 Line flushed with 10ml NS

41 Propofol 1000mg = 100ml of 10mg/ml, push

42 Line flushed with 10ml NS

43 Coma confirmed (no response to verbal stimulus, slow and weak pulse, slow  
44 and shallow breathing, no eyelash reflex)

45 Rocuronium 200mg = 20ml of 10mg/ml, push Bupivacaine 0.5% 100 mL, push  
46  
47  
48  
49  
50  
51  
52  
53  
54  
55  
56  
57  
58  
59  
60

1  
2  
3  
4  
5  
6  
7  
8  
9  
10  
11  
12  
13  
14  
15  
16  
17  
18  
19  
20  
21  
22  
23  
24  
25  
26  
27  
28  
29  
30  
31  
32  
33  
34  
35  
36  
37  
38  
39  
40  
41  
42  
43  
44  
45  
46  
47  
48  
49  
50  
51  
52  
53  
54  
55  
56  
57  
58  
59  
60

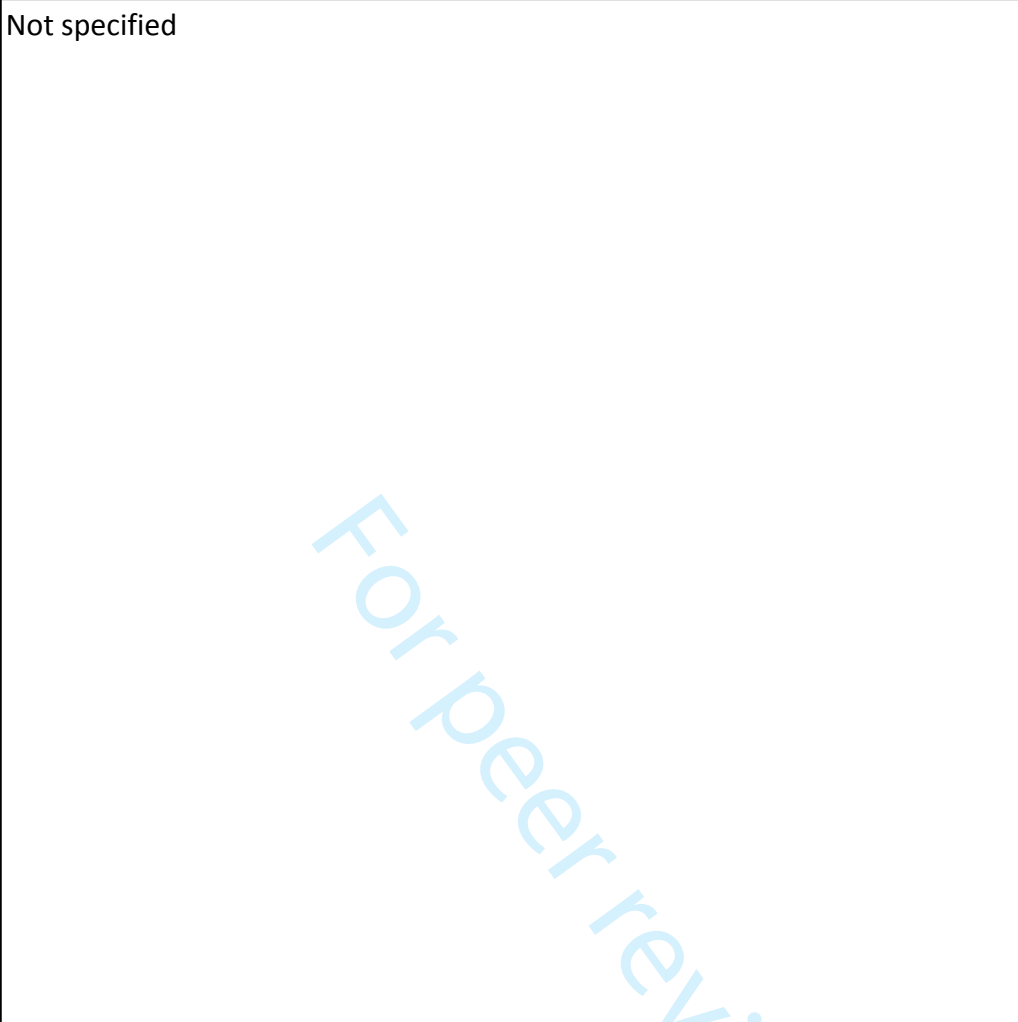

1  
2 No specific protocol provided; Recommended protocol is combination of  
3 benzodiazepine, barbiturate, and muscle relaxant.  
4  
5  
6  
7  
8  
9  
10  
11  
12  
13  
14  
15  
16  
17  
18  
19  
20  
21  
22  
23  
24  
25  
26  
27  
28  
29  
30  
31  
32  
33  
34  
35  
36  
37  
38  
39  
40  
41  
42  
43  
44  
45  
46  
47  
48  
49  
50  
51  
52  
53  
54  
55  
56  
57  
58  
59  
60

For peer review only

1  
2  
3  
4  
5  
6  
7  
8  
9  
10  
11  
12  
13  
14  
15  
16  
17  
18  
19  
20  
21  
22  
23  
24  
25  
26  
27  
28  
29  
30  
31  
32  
33  
34  
35  
36  
37  
38  
39  
40  
41  
42  
43  
44  
45  
46  
47  
48  
49  
50  
51  
52  
53  
54  
55  
56  
57  
58  
59  
60

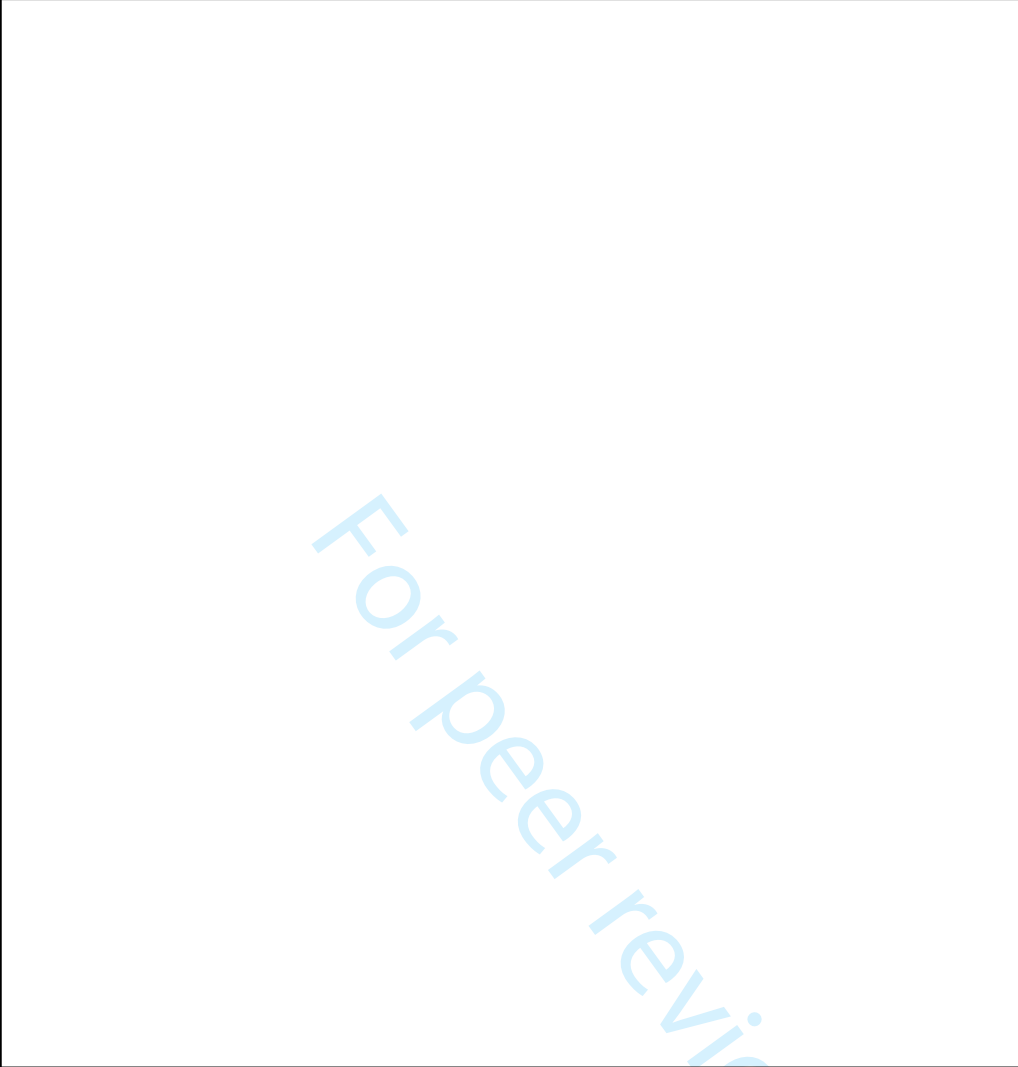

For peer review only

**Pharmaceutical Used - Oral Protocol**

Not specified

Not specified

1. antiemetic, 1 hour before procedure
2. 9 g of secobarbital sodium, dissolved in 20 mL of alcohol, 15 mL of water and 15 mL of bitter orange peel syrup



1  
2  
3  
4  
5  
6  
7  
8  
9  
10  
11  
12  
13  
14  
15  
16  
17  
18  
19  
20  
21  
22  
23  
24  
25  
26  
27  
28  
29  
30  
31  
32  
33  
34  
35  
36  
37  
38  
39  
40  
41  
42  
43  
44  
45  
46  
47  
48  
49  
50  
51  
52  
53  
54  
55  
56  
57  
58  
59  
60

- barbiturate alone  
- barbiturate po followed by muscle relaxant

Not specified

For peer review only

1  
2 Twenty of the 21 patients received prescriptions for 9 g of secobarbital  
3 or pentobarbital; 1 received a prescription for 1 g of secobarbital to be  
4 used in conjunction with an oral narcotic. The patients also received  
5 prescriptions for a number of nonlethal medications to be used  
6 concurrently with the lethal medication  
7  
8  
9  
10  
11  
12  
13  
14  
15

16 The choice of drugs for euthanasia generally followed published  
17 guidelines that recommend the combination of a barbiturate and a  
18 muscle relaxant given parenterally and a barbiturate mixture given  
19 orally. (See Table 1)  
20  
21 not specified  
22  
23  
24  
25  
26  
27  
28  
29  
30  
31  
32  
33  
34  
35  
36  
37  
38  
39  
40  
41  
42  
43  
44  
45  
46  
47  
48  
49  
50  
51  
52  
53  
54  
55  
56  
57  
58  
59  
60

1  
2  
3  
4  
5  
6  
7  
8  
9  
10  
11  
12  
13  
14  
15  
16  
17  
18  
19  
20  
21  
22  
23  
24  
25  
26  
27  
28  
29  
30  
31  
32  
33  
34  
35  
36  
37  
38  
39  
40  
41  
42  
43  
44  
45  
46  
47  
48  
49  
50  
51  
52  
53  
54  
55  
56  
57  
58  
59  
60

Not specified

No specific protocol provided. Drugs used are usually muscle relaxant and barbiturate.

For peer review only

1  
2  
3  
4  
5  
6  
7  
8  
9  
10  
11  
12  
13  
14  
15  
16  
17  
18  
19  
20  
21  
22  
23  
24  
25  
26  
27  
28  
29  
30  
31  
32  
33  
34  
35  
36  
37  
38  
39  
40  
41  
42  
43  
44  
45  
46  
47  
48  
49  
50  
51  
52  
53  
54  
55  
56  
57  
58  
59  
60

Not specified

Not specified

For peer review only

1  
2  
3  
4  
5  
6  
7  
8  
9  
10  
11  
12  
13  
14  
15  
16  
17  
18  
19  
20  
21  
22  
23  
24  
25  
26  
27  
28  
29  
30  
31  
32  
33  
34  
35  
36  
37  
38  
39  
40  
41  
42  
43  
44  
45  
46  
47  
48  
49  
50  
51  
52  
53  
54  
55  
56  
57  
58  
59  
60

the patient is given an oral dose of barbiturates, and death occurs swiftly without further intervention

Antiemetic (ondansetron) + secobarbital or pentobarbital

For peer review only

1  
2  
3  
4  
5  
6  
7  
8  
9  
10  
11  
12  
13  
14  
15  
16  
17  
18  
19  
20  
21  
22  
23  
24  
25  
26  
27  
28  
29  
30  
31  
32  
33  
34  
35  
36  
37  
38  
39  
40  
41  
42  
43  
44  
45  
46  
47  
48  
49  
50  
51  
52  
53  
54  
55  
56  
57  
58  
59  
60

|               |
|---------------|
| Not specified |
| Not specified |
| Not specified |
| Not specified |

For peer review only

1  
2  
3  
4  
5  
6  
7  
8  
9  
10  
11  
12  
13  
14  
15  
16  
17  
18  
19  
20  
21  
22  
23  
24  
25  
26  
27  
28  
29  
30  
31  
32  
33  
34  
35  
36  
37  
38  
39  
40  
41  
42  
43  
44  
45  
46  
47  
48  
49  
50  
51  
52  
53  
54  
55  
56  
57  
58  
59  
60

Not specified

Not specified

For peer review only

1  
2 Not specified  
3  
4  
5  
6  
7  
8  
9  
10

11 Not specified  
12  
13  
14  
15  
16  
17  
18  
19  
20  
21  
22

23 9 g secobarbital or 10 g pentobarbital, anti-emetic often used  
24  
25  
26  
27  
28  
29  
30  
31  
32  
33  
34  
35  
36  
37  
38  
39  
40  
41  
42  
43  
44  
45  
46  
47  
48  
49  
50  
51  
52  
53  
54  
55  
56  
57  
58  
59  
60



1  
2  
3  
4  
5  
6  
7  
8  
9  
10  
11  
12  
13  
14  
15  
16  
17  
18  
19  
20  
21  
22  
23  
24  
25  
26  
27  
28  
29  
30  
31  
32  
33  
34  
35  
36  
37  
38  
39  
40  
41  
42  
43  
44  
45  
46  
47  
48  
49  
50  
51  
52  
53  
54  
55  
56  
57  
58  
59  
60

|               |
|---------------|
| Not specified |
| Not specified |
| Not specified |

For peer review only

1  
2 Not specified  
3  
4  
5  
6  
7  
8  
9  
10  
11  
12  
13  
14  
15  
16  
17  
18  
19  
20  
21  
22  
23  
24  
25  
26  
27  
28  
29

30 Not specified  
31  
32  
33  
34  
35  
36  
37  
38  
39  
40  
41

42 In 300 of the Exit deaths in Canton Zurich, a barbiturate was the only  
43 drug used (following in-gestion of an anti-emetic) and was taken orally  
44 in 276 cases. In 261 cases 10–12 g pentobarbital was taken orally: the  
45 median interval before death was 23 minutes (range 7–1075 minutes,  
46 table 6). In 15 cases 10–15 g secobarbital was ingested and the median  
47 time to death was 25 minutes (range 11–626 minutes). In two further  
48 cases, pentobarbital was administered via PEG catheter  
49

50  
51 Not specified  
52  
53  
54  
55  
56  
57  
58  
59  
60

1  
2  
3  
4  
5  
6  
7  
8  
9  
10  
11  
12  
13  
14  
15  
16  
17  
18  
19  
20  
21  
22  
23  
24  
25  
26  
27  
28  
29  
30  
31  
32  
33  
34  
35  
36  
37  
38  
39  
40  
41  
42  
43  
44  
45  
46  
47  
48  
49  
50  
51  
52  
53  
54  
55  
56  
57  
58  
59  
60

Not specified

Not specified

For peer review only

1  
2  
3  
4  
5  
6  
7  
8  
9  
10  
11  
12  
13  
14  
15  
16  
17  
18  
19  
20  
21  
22  
23  
24  
25  
26  
27  
28  
29  
30  
31  
32  
33  
34  
35  
36  
37  
38  
39  
40  
41  
42  
43  
44  
45  
46  
47  
48  
49  
50  
51  
52  
53  
54  
55  
56  
57  
58  
59  
60

No protocol specified. Medication is usually a short-acting barbiturate.

For peer review only

Not specified

Not specified

Not specified

1  
2  
3  
4  
5  
6  
7  
8  
9  
10  
11  
12  
13  
14  
15  
16  
17  
18  
19  
20  
21  
22  
23  
24  
25  
26  
27  
28  
29  
30  
31  
32  
33  
34  
35  
36  
37  
38  
39  
40  
41  
42  
43  
44  
45  
46  
47  
48  
49  
50  
51  
52  
53  
54  
55  
56  
57  
58  
59  
60

|                                                                                                                                                                                           |
|-------------------------------------------------------------------------------------------------------------------------------------------------------------------------------------------|
| Not specified                                                                                                                                                                             |
| Not specified                                                                                                                                                                             |
| Not specified                                                                                                                                                                             |
| Respondents reported honoring 32 requests for prescriptions (40% of 80 requests honored), 43 requests for injections (54%), and 5 nonspecific requests for either type of assistance (6%) |
| Not specified                                                                                                                                                                             |

For peer review only

1  
2  
3  
4  
5  
6  
7  
8  
9  
10  
11  
12  
13  
14  
15  
16  
17  
18  
19  
20  
21  
22  
23  
24  
25  
26  
27  
28  
29  
30  
31  
32  
33  
34  
35  
36  
37  
38  
39  
40  
41  
42  
43  
44  
45  
46  
47  
48  
49  
50  
51  
52  
53  
54  
55  
56  
57  
58  
59  
60

|               |
|---------------|
| Not specified |
| Not specified |
| Not specified |

For peer review only

|    |                                                                                |
|----|--------------------------------------------------------------------------------|
| 1  |                                                                                |
| 2  | Not specified                                                                  |
| 3  |                                                                                |
| 4  |                                                                                |
| 5  |                                                                                |
| 6  | Not specified                                                                  |
| 7  |                                                                                |
| 8  |                                                                                |
| 9  |                                                                                |
| 10 |                                                                                |
| 11 |                                                                                |
| 12 | Not specified                                                                  |
| 13 |                                                                                |
| 14 |                                                                                |
| 15 |                                                                                |
| 16 | Not specified                                                                  |
| 17 |                                                                                |
| 18 |                                                                                |
| 19 |                                                                                |
| 20 |                                                                                |
| 21 |                                                                                |
| 22 |                                                                                |
| 23 |                                                                                |
| 24 |                                                                                |
| 25 | If the euthanaticum is taken orally, the process of dying can take a few       |
| 26 | hours. To reduce the chance of vomiting, it is advisable to administer         |
| 27 | 10 mg of methoclopramide orally, intravenously or intra- muscularly            |
| 28 | thrice within a period of 1 day. For oral administration, the following        |
| 29 | formula has been recommended: 100 mL of saline with 9 g of                     |
| 30 | pentobarbitalnatrium (mixtura non therapeutica pentobarbitali). It is          |
| 31 | sometimes necessary to administer an additional 20 mg of pancuronium           |
| 32 | dibromide intravenously if the dying process is prolonged.                     |
| 33 |                                                                                |
| 34 |                                                                                |
| 35 |                                                                                |
| 36 |                                                                                |
| 37 |                                                                                |
| 38 |                                                                                |
| 39 | It is advisable to administer 10 mg of methoclopramide orally, IV or IM thrice |
| 40 | within a period of 1 day. For oral administration, the following formula has   |
| 41 | been recommended: 100 mL of saline with 9g pentobarbitalnatrium. It is         |
| 42 | sometimes necessary to administer an additional 20mg pancuronium               |
| 43 | dibromide IV when the dying process takes too long.                            |
| 44 |                                                                                |
| 45 |                                                                                |
| 46 |                                                                                |
| 47 |                                                                                |
| 48 |                                                                                |
| 49 |                                                                                |
| 50 |                                                                                |
| 51 |                                                                                |
| 52 |                                                                                |
| 53 |                                                                                |
| 54 |                                                                                |
| 55 |                                                                                |
| 56 |                                                                                |
| 57 |                                                                                |
| 58 |                                                                                |
| 59 |                                                                                |
| 60 |                                                                                |

1  
2  
3  
4  
5  
6  
7  
8  
9  
10  
11  
12  
13  
14  
15  
16  
17  
18  
19  
20  
21  
22  
23  
24  
25  
26  
27  
28  
29  
30  
31  
32  
33  
34  
35  
36  
37  
38  
39  
40  
41  
42  
43  
44  
45  
46  
47  
48  
49  
50  
51  
52  
53  
54  
55  
56  
57  
58  
59  
60

|               |
|---------------|
| Not specified |
| Not specified |

For peer review only



1  
2  
3  
4  
5  
6  
7  
8  
9  
10  
11  
12  
13  
14  
15  
16  
17  
18  
19  
20  
21  
22  
23  
24  
25  
26  
27  
28  
29  
30  
31  
32  
33  
34  
35  
36  
37  
38  
39  
40  
41  
42  
43  
44  
45  
46  
47  
48  
49  
50  
51  
52  
53  
54  
55  
56  
57  
58  
59  
60

Not specified

Not specified

Combination agents, such as brallobarbitalum compositum, are administered or taken together in one form (drink, suppository, tablet), in contrast to a combination of substances such as secobarbital and dextropropoxyfen, which are taken immediately, but in succession. (See IV Protocol for further detail)

For peer review only

1  
2 One study also reported that in 30% of the cases a single drug such as  
3 a barbiturate or an opioid was used; in 57% of the cases, a  
4 combination of two drugs such as a benzodiazepine or a barbiturate  
5 with neuromuscular relaxant were used. 75% the medications were  
6 given via the parenteral route, followed by the 21% by oral route. (See  
7 Table 2)  
8  
9  
10  
11  
12  
13  
14  
15  
16  
17  
18  
19  
20  
21  
22

23 The first study on the practice of physician-assisted suicide involving  
24 patients from Oregon (n = 15), re-ported the use of 9g of pentobarbital  
25 or secobarbital in all patients but one. For physician-assisted suicide, the  
26 recommendations advise 9g of either pentobarbital or secobarbital in a  
27 100ml solution. Other barbiturates and mixtures, for example with  
28 brallobarbital, are discouraged. It is advised that anti-emetics (for in-  
29 stance, metoclopramide 20mg every 8 hours) be started 24 hours before  
30 taking the barbiturate. Even so, the dying process may take between 1  
31 and 24 hours.  
32  
33  
34  
35  
36  
37  
38  
39  
40  
41  
42  
43  
44  
45  
46  
47  
48  
49  
50  
51  
52  
53  
54  
55  
56  
57  
58  
59  
60

1  
2  
3  
4  
5  
6  
7  
8  
9  
10  
11  
12  
13  
14  
15  
16  
17  
18  
19  
20  
21  
22  
23  
24  
25  
26  
27  
28  
29  
30  
31  
32  
33  
34  
35  
36  
37  
38  
39  
40  
41  
42  
43  
44  
45  
46  
47  
48  
49  
50  
51  
52  
53  
54  
55  
56  
57  
58  
59  
60

Not specified

Not specified

Not specified

For peer review only

1  
2 9 g of secobarbital sodium, dissolved in 20 mL of alcohol, 15 mL of water and  
3 15 mL of bitter orange peel syrup, with previously taken precautions  
4 regarding the risk of vomiting (administration of an antiemetic one hour  
5 before)  
6  
7  
8  
9  
10  
11  
12  
13  
14  
15  
16  
17  
18  
19  
20  
21  
22  
23  
24  
25  
26  
27  
28  
29  
30  
31  
32  
33  
34

35 Sodium pentobarbital 10 g  
36  
37  
38  
39  
40  
41  
42  
43  
44  
45  
46  
47  
48  
49  
50  
51  
52  
53  
54  
55  
56  
57  
58  
59  
60

1  
2  
3  
4  
5  
6  
7  
8  
9  
10  
11  
12  
13  
14  
15  
16  
17  
18  
19  
20  
21  
22  
23  
24  
25  
26  
27  
28  
29  
30  
31  
32  
33  
34  
35  
36  
37  
38  
39  
40  
41  
42  
43  
44  
45  
46  
47  
48  
49  
50  
51  
52  
53  
54  
55  
56  
57  
58  
59  
60

Not specified

Not specified

For peer review only

1  
2 No specific protocol provided. Options include:

- 3 - Muscle relaxant alone  
4 - muscle relaxant and barbiturate  
5 - Muscle relaxant and drug other than barbiturate  
6 - Barbiturate alone  
7 - Barbiturate and drug other than muscle relaxant  
8 - Opioid alone  
9 - Opioid and drug other than muscle relaxant and barbiturate  
10 - Benzodiazepine alone

11 See Table 4 for more detail  
12  
13  
14  
15  
16  
17  
18  
19  
20  
21  
22  
23  
24  
25  
26  
27  
28  
29  
30  
31  
32  
33  
34

35  
36 Not specified  
37  
38  
39  
40  
41  
42  
43  
44  
45  
46  
47  
48  
49  
50  
51  
52  
53  
54  
55  
56  
57  
58  
59  
60

1  
2  
3  
4  
5  
6  
7  
8  
9  
10  
11  
12  
13  
14  
15  
16  
17  
18  
19  
20  
21  
22  
23  
24  
25  
26  
27  
28  
29  
30  
31  
32  
33  
34  
35  
36  
37  
38  
39  
40  
41  
42  
43  
44  
45  
46  
47  
48  
49  
50  
51  
52  
53  
54  
55  
56  
57  
58  
59  
60

Not specified

Not specified

For peer review only

Not specified

1  
2  
3  
4  
5  
6  
7  
8  
9  
10  
11  
12  
13  
14  
15  
16  
17  
18  
19  
20  
21  
22  
23  
24  
25  
26  
27  
28  
29  
30  
31  
32  
33  
34  
35  
36  
37  
38  
39  
40  
41  
42  
43  
44  
45  
46  
47  
48  
49  
50  
51  
52  
53  
54  
55  
56  
57  
58  
59  
60

Not specified

No specific protocol provided. Options include:  
- Barbiturate alone  
- Barbiturate + neuromuscular relaxant  
Oral protocols generally include 9 g of barbiturate

Not specified

Prescription of an oral agent to induce euthanasia is less common, although one doctor in the survey described giving an oral solution of secobarbital after a 24-hour course of a prokinetic antiemetic to prevent vomiting.

Drugs were usually taken orally (D: 90.9%; E: 75.5%). Table 3 shows that more Exit Deutsche Schweiz deaths followed pentobarbital administered intravenously, by gastric tube or via PEG than those of Dignitas (24.5%; 9.1%). People suffering from fatal rather than non-fatal disease were also more likely to use a non-oral route.



1  
2  
3  
4  
5  
6  
7  
8  
9  
10  
11  
12  
13  
14  
15  
16  
17  
18  
19  
20  
21  
22  
23  
24  
25  
26  
27  
28  
29  
30  
31  
32  
33  
34  
35  
36  
37  
38  
39  
40  
41  
42  
43  
44  
45  
46  
47  
48  
49  
50  
51  
52  
53  
54  
55  
56  
57  
58  
59  
60

Not specified

Not specified

For peer review only

1  
2 In all 60 patients who received the oral administration, the mixed  
3 liquor was notpeutica pento (seco) barbitali from the report used. With  
4 2 patients, this was combined with midazolam and in one case with the  
5 analgesic dextropropoxyphene. Report recommends starting the day with an  
6 anti-emetic when giving the euthenatic drink. In most patients  
7 metoclopramide was used. 1 time ondansetron was used for premedication.  
8  
9  
10  
11  
12  
13  
14  
15  
16  
17  
18  
19  
20  
21  
22  
23  
24  
25

26 Not specified  
27  
28  
29  
30  
31  
32  
33  
34  
35  
36  
37  
38  
39  
40  
41  
42  
43  
44  
45  
46  
47  
48  
49  
50  
51  
52  
53  
54  
55  
56  
57  
58  
59  
60

1  
2 Not specified  
3  
4  
5  
6  
7

8 The oral administration of 3g of dextropropoxyphene hydrochloride followed  
9 by 9g of sodium secobarbital or sodium pentobarbital preceded by an  
10 antiemetic (metoclopramide) for a day. In the presence of tolerance to  
11 dextropropoxyphene, the recommendation was to use 3g of orphenadrine  
12 hydrochloride. (See table 1) Further recommendatons from the 1994  
13 Admiraal report: The use of oral agents can be effective. If oral agents are  
14 used, physicians need to be aware of the possibility that active termination  
15 using a muscular relaxant may be necessary. It is suggested that the muscle  
16 relaxant be used about five hours after ingestion of the oral drug, or earlier if  
17 the need is felt when the patient did not or could not drink it all. The  
18 recommended drug is 9 grams of sodium pentobarbital or secobarbital in 100  
19 ml of liquid, with an antiemetic used for one day prior to the administration  
20 of the euthanatic drug.  
21  
22  
23  
24  
25  
26  
27  
28  
29  
30  
31  
32  
33  
34  
35  
36  
37  
38  
39  
40  
41  
42  
43  
44  
45  
46  
47  
48  
49  
50  
51  
52  
53  
54  
55  
56  
57  
58  
59  
60

1  
2 Not specified  
3  
4  
5  
6  
7  
8  
9  
10  
11  
12  
13  
14  
15  
16  
17  
18  
19  
20  
21  
22  
23  
24  
25  
26

27 Antiemetic as premedication

28 Pentobarbital (81%), secobarbital (15.5%), or phenobarbital (1.7%) with  
29 (17.2%) or without (82.8%) muscle relaxant  
30  
31  
32  
33  
34  
35  
36  
37  
38  
39  
40  
41  
42  
43  
44  
45  
46  
47  
48  
49  
50  
51  
52  
53  
54  
55  
56  
57  
58  
59  
60

1  
2  
3  
4  
5  
6  
7  
8  
9  
10  
11  
12  
13  
14  
15  
16  
17  
18  
19  
20  
21  
22  
23  
24  
25  
26  
27  
28  
29  
30  
31  
32  
33  
34  
35  
36  
37  
38  
39  
40  
41  
42  
43  
44  
45  
46  
47  
48  
49  
50  
51  
52  
53  
54  
55  
56  
57  
58  
59  
60

Not specified

Not specified

For peer review only

Oral intake of 9 g of sodium secobarbital, dissolved in 20 ml of alcohol and 15 ml of water and flavored with orange peel (50 ml) is proposed, with the same precautions regarding the risk of vomiting.

1  
2  
3  
4  
5  
6  
7  
8  
9  
10  
11  
12  
13  
14  
15  
16  
17  
18  
19  
20  
21  
22  
23  
24  
25  
26  
27  
28  
29  
30  
31  
32  
33  
34  
35  
36  
37  
38  
39  
40  
41  
42  
43  
44  
45  
46  
47  
48  
49  
50  
51  
52  
53  
54  
55  
56  
57  
58  
59  
60

Not specified

Not specified

For peer review only

Not specified

1  
2  
3  
4  
5  
6  
7  
8  
9  
10  
11  
12  
13  
14  
15  
16  
17  
18  
19  
20  
21  
22  
23  
24  
25  
26  
27  
28  
29  
30  
31  
32  
33  
34  
35  
36  
37  
38  
39  
40  
41  
42  
43  
44  
45  
46  
47  
48  
49  
50  
51  
52  
53  
54  
55  
56  
57  
58  
59  
60

Not specified

Not specified

Not specified

For peer review only

1  
2 Not specified  
3  
4  
5  
6  
7  
8  
9  
10  
11  
12  
13  
14  
15  
16  
17  
18  
19  
20  
21  
22  
23  
24  
25  
26  
27  
28  
29  
30  
31  
32  
33  
34

35  
36 No specific protocol provided; Options include:  
37 - Barbiturate alone (34.3% of cases)  
38 - Barbiturate + neuromuscular relaxant (58.1%)  
39 - Morphine alone or in conjunction with sedative (0.9%)  
40  
41  
42  
43  
44  
45  
46  
47  
48  
49  
50  
51  
52  
53  
54  
55  
56  
57  
58  
59  
60



1  
2 No specific protocol provided. Options include:

3 - Barbiturate, neuromuscular relaxant, or both (used mainly in cases reported  
4 to review committee)

5  
6 - Opioids, alone or in conjunction with benzodiazepine (used mainly in cases  
7 not reported to review committee)

8 See Table 3 for details about medications used. Medication route not  
9 specified.  
10  
11  
12  
13  
14  
15  
16  
17  
18  
19  
20  
21  
22  
23  
24  
25  
26  
27  
28  
29  
30  
31  
32  
33  
34

35 Protocols include:

36 - Opioid (SC with intervals) + benzodiazepine (SC with intervals)

37 - Phenothiazine (PO 1 dose) + opioid (TD continuous) + opioid (SCC)  
38  
39  
40  
41  
42  
43  
44  
45  
46  
47  
48  
49  
50  
51  
52  
53  
54  
55  
56  
57  
58  
59  
60

1  
2  
3  
4  
5  
6  
7  
8  
9  
10  
11  
12  
13  
14  
15  
16  
17  
18  
19  
20  
21  
22  
23  
24  
25  
26  
27  
28  
29  
30  
31  
32  
33  
34  
35  
36  
37  
38  
39  
40  
41  
42  
43  
44  
45  
46  
47  
48  
49  
50  
51  
52  
53  
54  
55  
56  
57  
58  
59  
60

Not specified

Protocol not specified. Main life-ending drug: sodium thiopental.

For Peer review only

1  
2  
3  
4  
5  
6  
7  
8  
9  
10  
11  
12  
13  
14  
15  
16  
17  
18  
19  
20  
21  
22  
23  
24  
25  
26  
27  
28  
29  
30  
31  
32  
33  
34  
35  
36  
37  
38  
39  
40  
41  
42  
43  
44  
45  
46  
47  
48  
49  
50  
51  
52  
53  
54  
55  
56  
57  
58  
59  
60

Not specified

Not specified

For peer review only

1  
2 No protocol specified. Medication is barbiturates and/or muscle relaxants in  
3 73.9% of cases. Morphine or morphine-like agents used in 16.2%. Route of  
4 administration not specified  
5  
6  
7  
8  
9  
10  
11  
12  
13  
14  
15  
16  
17  
18  
19  
20  
21  
22  
23  
24  
25  
26  
27  
28  
29  
30  
31  
32  
33  
34  
35  
36  
37  
38  
39  
40  
41  
42  
43  
44  
45  
46  
47  
48  
49  
50  
51  
52  
53  
54  
55  
56  
57  
58  
59  
60

For peer review only

1  
2 No specific protocol provided. Drugs administered could have been  
3 neuromuscular relaxants, in any combination; barbiturates, alone or in  
4 combination with other drugs except neuromuscular relaxants; opioids, alone  
5 or in combination with other drugs except neuromuscular relaxants and  
6 barbiturates; benzodiazepines, alone or in combination with other drugs  
7 except neuromuscular  
8 relaxants, barbiturates, and opioids; or other drugs, in any combination.  
9  
10  
11  
12  
13  
14  
15  
16  
17  
18  
19  
20  
21  
22  
23  
24  
25  
26  
27  
28  
29  
30  
31  
32  
33  
34  
35  
36  
37  
38  
39  
40  
41  
42  
43  
44  
45  
46  
47  
48  
49  
50  
51  
52  
53  
54  
55  
56  
57  
58  
59  
60

For peer review only

1  
2  
3  
4  
5  
6  
7  
8  
9  
10  
11  
12  
13  
14  
15  
16  
17  
18  
19  
20  
21  
22  
23  
24  
25  
26  
27  
28  
29  
30  
31  
32  
33  
34  
35  
36  
37  
38  
39  
40  
41  
42  
43  
44  
45  
46  
47  
48  
49  
50  
51  
52  
53  
54  
55  
56  
57  
58  
59  
60

Not specified

For peer review only

1  
2  
3  
4  
5  
6  
7  
8  
9  
10  
11  
12  
13  
14  
15  
16  
17  
18  
19  
20  
21  
22  
23  
24  
25  
26  
27  
28  
29  
30  
31  
32  
33  
34  
35  
36  
37  
38  
39  
40  
41  
42  
43  
44  
45  
46  
47  
48  
49  
50  
51  
52  
53  
54  
55  
56  
57  
58  
59  
60

Not specified

For peer review only

the appropriate medication, an anti-emetic agent, and a sweet-tasting mixture to mask the bitterness of the barbiturates should increase the likelihood that terminally ill persons who ingest lethal medication will be able to experience a quick and comfortable death.

Barbiturates, lethal dose. No specific protocol provided.

1  
2  
3  
4  
5  
6  
7  
8  
9  
10  
11  
12  
13  
14  
15  
16  
17  
18  
19  
20  
21  
22  
23  
24  
25  
26  
27  
28  
29  
30  
31  
32  
33  
34  
35  
36  
37  
38  
39  
40  
41  
42  
43  
44  
45  
46  
47  
48  
49  
50  
51  
52  
53  
54  
55  
56  
57  
58  
59  
60

Not specified



For peer review only



1  
2 MIXTURA NONTHERAPEUTICA PENTOBARBITAL (150MG/ML)

3 Formula - see also the 'Comments' section pentobarbital sodium  
4 alcohol 96% V/V purified water propylene glycol saccharin sodium  
5 syrup simplex star anise oil  
6

7 15 g16.2 g (20 ml)

8 15 g10.4 g (10 ml)

9 250 mg 65 g

10 1 drop  
11

12  
13  
14 121.85 g (100 ml)Preparation - See LNA procedure 'Solution for oral  
15 use', preparation (F06-4) and the  
16 'Comments' section.  
17

18 Mix the purified water, propylene glycol and the alcohol.

19 Dissolve the pentobarbital sodium in this mixture whilst stirring.

20 Dissolve the saccharin sodium in this mixture.

21 Mix with the sugar syrup and the star anise oil. Packaging Bottle that  
22 protects the contents from the effects of light. Storage Unopened  
23 bottle:  
24

25 • patient's bottle: 1 month: store under 25°C, but not in the refrigerator  
26 or freezer.  
27

28 Labelling

29 Shelf life and storage temperature of an unopened bottle.  
30  
31  
32  
33  
34

35  
36 Not specified  
37  
38  
39  
40  
41  
42  
43  
44  
45  
46  
47  
48  
49  
50  
51  
52  
53  
54  
55  
56  
57  
58  
59  
60

1  
2  
3  
4  
5  
6  
7  
8  
9  
10  
11  
12  
13  
14  
15  
16  
17  
18  
19  
20  
21  
22  
23  
24  
25  
26  
27  
28  
29  
30  
31  
32  
33  
34  
35  
36  
37  
38  
39  
40  
41  
42  
43  
44  
45  
46  
47  
48  
49  
50  
51  
52  
53  
54  
55  
56  
57  
58  
59  
60

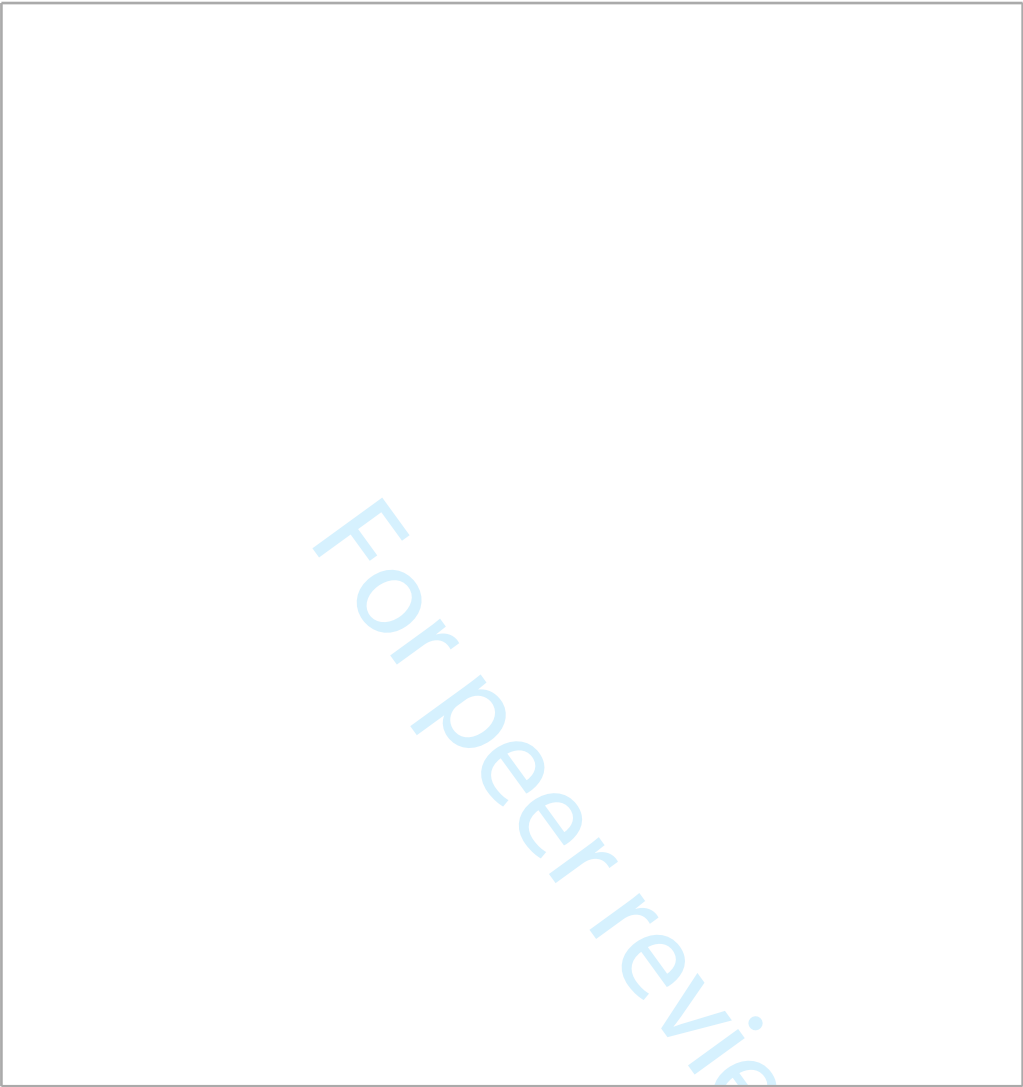

For peer review only

1  
2  
3  
4  
5  
6  
7  
8  
9  
10  
11  
12  
13  
14  
15  
16  
17  
18  
19  
20  
21  
22  
23  
24  
25  
26  
27  
28  
29  
30  
31  
32  
33  
34  
35  
36  
37  
38  
39  
40  
41  
42  
43  
44  
45  
46  
47  
48  
49  
50  
51  
52  
53  
54  
55  
56  
57  
58  
59  
60

Not specified

Not specified

Not specified

For peer review only

1  
2 Not specified  
3  
4  
5  
6  
7  
8

9 Not specified  
10  
11  
12  
13  
14  
15  
16  
17  
18  
19  
20  
21  
22  
23  
24  
25  
26  
27  
28  
29  
30  
31  
32  
33  
34  
35  
36  
37  
38  
39  
40  
41  
42

43 metoclopramide 10 mg tablets, 20 mg PO one hour prior; ondansetron 8 mg  
44 PO one hour prior; lorazepam 0.5 to 1 mg SI 5 to 10 minutes prior if needed.  
45 Liquid by mouth: phenobarbital 20 g, chloral hydrate 20 g, morphine sulphate  
46 3 g, acesulfame potassium 365 mg , sterol glycosides 95% 370 mg, magna  
47 sweet 360 mg, artificial flavour, distilled water, mix with suspending liquid  
48 and drink in less than for minutes. For patients with NG or PEG tube:  
49 phenobarbital 20g , chloral hydrate 20g, morphine sulphate 3 g, acesulfame  
50 potassium 365 mg, sterol glycosides 95% 370 mg, magna sweet 360 mg, mix  
51 in 120 mL water, administer in less than 4 minutes and flush tube with 60-90  
52 mL water after.  
53  
54  
55  
56  
57  
58  
59  
60

1  
2  
3  
4  
5  
6  
7  
8  
9  
10  
11  
12  
13  
14  
15  
16  
17  
18  
19  
20  
21  
22  
23  
24  
25  
26  
27  
28  
29  
30  
31  
32  
33  
34  
35  
36  
37  
38  
39  
40  
41  
42  
43  
44  
45  
46  
47  
48  
49  
50  
51  
52  
53  
54  
55  
56  
57  
58  
59  
60

Not specified

Not specified

1. Gastric Motility/Anti-Emetic: metoclopramide 20 mg (tablets); 10 mg tablets x 2; 20 mg (2 tablets) orally one hour prior to ingesting coma-inducing agent. Ondansetron 8mg (tablet); 8 mg tablet x 1; 8 mg (1 tablet) orally one hour prior to ingesting coma-inducing agent. haloperidol 5mg (5 mg/mL); 5 mg intravenous vials x 2; 5 mg subcutaneous or IV over 1 minute PRN for emesis during procedure. May repeat additional dose x 1 PRN. Use haloperidol 5 mg/mL intravenous formulation. 2.

Anxiolytic: LORazepam 0.5mg (sublingual tablets) 0.5mg sublingual tablets x 8; 0.5 mg to 2 mg (1 to 4 tablets) sublingually, 5 to 10 minutes prior to ingesting coma-inducing agent, if needed for anxiety. May repeat additional dose x 1 PRN. 3.

COMA Inducing Agent: Option A: secobarbital sodium 15 g, alcohol 99% v/v 16.2 g (20 mL), distilled water 15 (mL), propylene glycol 10.4 g (10 mL), saccharin sodium 250 mg, syrup simplex 65 g, clover of choice/as required 1 drop) mix distilled water, propylene glycol and alcohol. dissolve secobarbital in the mixe while stirring, dissolve saccharin in mixture. mix with syrup and star anise oil. unable bottle can store 1 month. sure under 25C but do not refrigerate or freeze. Option B: Powder Mixture: phenobarbital powder\*20g, chloral hydrate powder\*20g, morphine sulphate powder\*\*3g (omit if patient has morphine allergy) Shake well. Ingest the entire prescription in less than 4 minutes. \*Active ingredients required for coma induction.\*\*Optional, depending on patient factors (e.g., adverse effects, tolerance).Stable for 72hours. Patient to follow with a small amount of non-fat, non-carbonated drink. If compound is to be administered via PEG or NG tube, replace "ORA-Plus®/ORA Sweet®"with 120mL of water. Flush feeding-tube with 60 to 90 mL of water after medication.

**1. Gastric Motility/Nausea Prevention**

haloperidol 2 mg PO/SC/IV one hour prior to ingestion of coma-inducing compound (Dispense: 2 mg)

*PLUS*

metoclopramide 20 mg PO/SC/IV one hour prior to ingestion of coma-inducing compound (Dispense: 20 mg)

*OR if intolerant to metoclopramide*

ondansetron 8 mg PO/SC/IV one hour prior to ingestion of coma-inducing compound (Dispense: 8 mg)

Not specified

Not specified

1  
2  
3  
4  
5  
6  
7  
8  
9  
10  
11  
12  
13  
14  
15  
16  
17  
18  
19  
20  
21  
22  
23  
24  
25  
26  
27  
28  
29  
30  
31  
32  
33  
34  
35  
36  
37  
38  
39  
40  
41  
42  
43  
44  
45  
46  
47  
48  
49  
50  
51  
52  
53  
54  
55  
56  
57  
58  
59  
60

Not specified

Not specified

For peer review only

1  
2  
3  
4  
5  
6  
7  
8  
9  
10  
11  
12  
13  
14  
15  
16  
17  
18  
19  
20  
21  
22  
23  
24  
25  
26  
27  
28  
29  
30  
31  
32  
33  
34  
35  
36  
37  
38  
39  
40  
41  
42  
43  
44  
45  
46  
47  
48  
49  
50  
51  
52  
53  
54  
55  
56  
57  
58  
59  
60

Not specified

Not specified

No protocol specified. Pentobarbital sodium = drug used.

For peer review only



1  
2  
3  
4  
5  
6  
7  
8  
9  
10  
11  
12  
13  
14  
15  
16  
17  
18  
19  
20  
21  
22  
23  
24  
25  
26  
27  
28  
29  
30  
31  
32  
33  
34  
35  
36  
37  
38  
39  
40  
41  
42  
43  
44  
45  
46  
47  
48  
49  
50  
51  
52  
53  
54  
55  
56  
57  
58  
59  
60

Not specified

Not specified

For peer review only

1  
2  
3  
4  
5  
6  
7  
8  
9  
10  
11  
12  
13  
14  
15  
16  
17  
18  
19  
20  
21  
22  
23  
24  
25  
26  
27  
28  
29  
30  
31  
32  
33  
34  
35  
36  
37  
38  
39  
40  
41  
42  
43  
44  
45  
46  
47  
48  
49  
50  
51  
52  
53  
54  
55  
56  
57  
58  
59  
60

Not specified

Not specified

Not specified

For peer review only

1. Antiemetic (metaclopramide), taken one hour before ingesting barbiturate.
2. Secobarbital 9 g capsules or 10 g pentobarbital liquid, consumed in a single dose. Capsule contents or liquid should be mixed with sweet substance such as juice. Lethal dose should be taken on an empty stomach.

chloral hydrate 20 gm, phenobarbital 20 gm, morphine sulfate 3 gm, and water.

To enhance absorption, your patient should consume only clear or non-fatty liquids for approximately 4-6 hours prior to ingestion of the barbiturate. Laxatives should be discontinued for at least 24 hours.

To speed absorption and prevent nausea, we suggest metoclopramide (Reglan) 20 mg and ondansetron (Zofran) 8 mg about 1 hour prior to taking the barbiturate.

Since people fall asleep rapidly with this mixture, we suggest the patient ingest the mixture within approximately 1-2 minutes. After ingesting the lethal suspension, he or she may wish to consume a room temperature non-carbonated non-fatty beverage to minimize the bitter taste.

4. Reports indicate that this solution may crystallize if left too long in a refrigerator; the current recommendation is that it be ingested no longer than two weeks after it is received.

Note: ALS patients: For those using a straw, liquid opioid can be sucked through a straw. Follow it with a small amount of water to rinse the straw.

Note: Patients with PEG tubes: The opioid liquid or the crushed tablets in water may be ingested by pouring the suspension into the tube through the barrel of a 60 ml syringe with a funnel shaped tip. The patient may need help holding the syringe barrel and PEG tube.

1  
2 No specific protocol described; medication options include:

3 - pentobarbital, 10 g

4 - secobarbital, 10 g

5  
6 (See table 3 for trends in type of medication used)

7  
8  
9  
10  
11  
12  
13  
14  
15  
16  
17  
18  
19  
20  
21  
22 Not specified

23  
24  
25  
26  
27  
28  
29  
30  
31  
32  
33  
34  
35  
36  
37  
38  
39  
40  
41  
42  
43  
44  
45  
46  
47  
48  
49  
50  
51  
52  
53  
54  
55  
56  
57  
58  
59  
60

For peer review only

1  
2  
3  
4  
5  
6  
7  
8  
9  
10  
11  
12  
13  
14  
15  
16  
17  
18  
19  
20  
21  
22  
23  
24  
25  
26  
27  
28  
29  
30  
31  
32  
33  
34  
35  
36  
37  
38  
39  
40  
41  
42  
43  
44  
45  
46  
47  
48  
49  
50  
51  
52  
53  
54  
55  
56  
57  
58  
59  
60

No specific protocol described; Oregon: overdose of barbiturates taken as several ounces of liquid.

Not specified

Not specified

For peer review only

1  
2 Sodium phenobarbital  
3  
4  
5  
6  
7  
8  
9  
10  
11  
12  
13  
14  
15  
16  
17  
18  
19  
20  
21  
22  
23  
24

25  
26 No specific protocol: drugs used included neuromuscular relaxants,  
27 barbiturates, benzodiazepines and opioids.  
28  
29  
30  
31  
32  
33  
34  
35  
36  
37  
38  
39  
40

41 Not specified  
42  
43  
44  
45  
46  
47  
48  
49  
50  
51  
52  
53  
54  
55  
56  
57  
58  
59  
60

1  
2  
3  
4  
5  
6  
7  
8  
9  
10  
11  
12  
13  
14  
15  
16  
17  
18  
19  
20  
21  
22  
23  
24  
25  
26  
27  
28  
29  
30  
31  
32  
33  
34  
35  
36  
37  
38  
39  
40  
41  
42  
43  
44  
45  
46  
47  
48  
49  
50  
51  
52  
53  
54  
55  
56  
57  
58  
59  
60

Not specified

No specific protocol described; Medication options include:

- phenobarbital (50%)
- secobarbital (46.4%)
- combination of chloral hydrate, morphine sulfate, and phenobarbital (4.6%)

For peer review only

1  
2 Secobarbital; Pentobarbital; Seco/pento combination; phenobarb;  
3 retrospective data collection without doses etc.  
4  
5  
6  
7  
8  
9  
10  
11  
12  
13  
14  
15  
16  
17  
18  
19  
20  
21  
22  
23  
24  
25  
26  
27  
28  
29  
30  
31  
32  
33  
34

35  
36 Not specified  
37  
38  
39  
40  
41  
42  
43  
44  
45  
46  
47  
48  
49  
50  
51  
52  
53  
54  
55  
56  
57  
58  
59  
60



1  
2  
3  
4  
5  
6  
7  
8  
9  
10  
11  
12  
13  
14  
15  
16  
17  
18  
19  
20  
21  
22  
23  
24  
25  
26  
27  
28  
29  
30  
31  
32  
33  
34  
35  
36  
37  
38  
39  
40  
41  
42  
43  
44  
45  
46  
47  
48  
49  
50  
51  
52  
53  
54  
55  
56  
57  
58  
59  
60

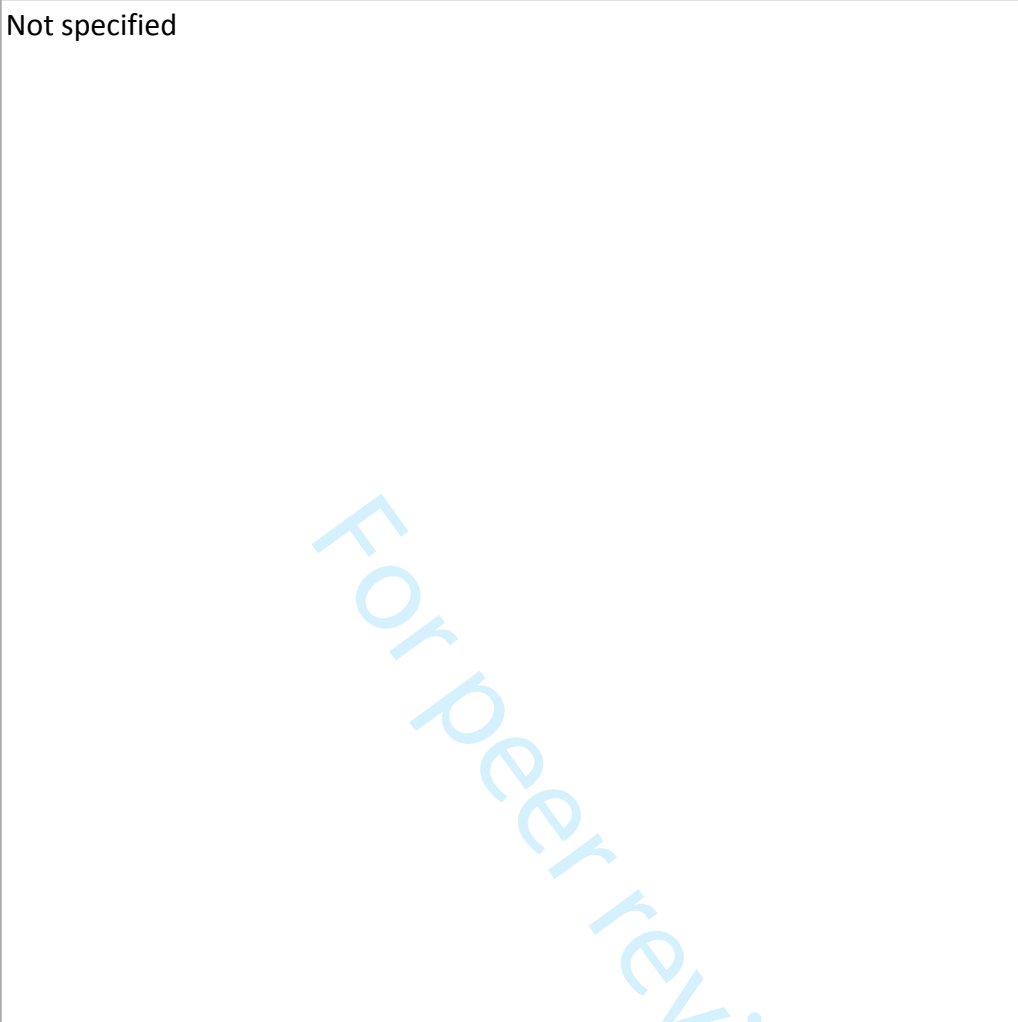

1  
2 No specific protocol provided; Recommended protocol is combination of  
3 benzodiazepine, barbiturate, and muscle relaxant.  
4  
5  
6  
7  
8  
9  
10  
11  
12  
13  
14  
15  
16  
17  
18  
19  
20  
21  
22  
23  
24  
25  
26  
27  
28  
29  
30  
31  
32  
33  
34  
35  
36  
37  
38  
39  
40  
41  
42  
43  
44  
45  
46  
47  
48  
49  
50  
51  
52  
53  
54  
55  
56  
57  
58  
59  
60

For peer review only

1  
2  
3  
4  
5  
6  
7  
8  
9  
10  
11  
12  
13  
14  
15  
16  
17  
18  
19  
20  
21  
22  
23  
24  
25  
26  
27  
28  
29  
30  
31  
32  
33  
34  
35  
36  
37  
38  
39  
40  
41  
42  
43  
44  
45  
46  
47  
48  
49  
50  
51  
52  
53  
54  
55  
56  
57  
58  
59  
60

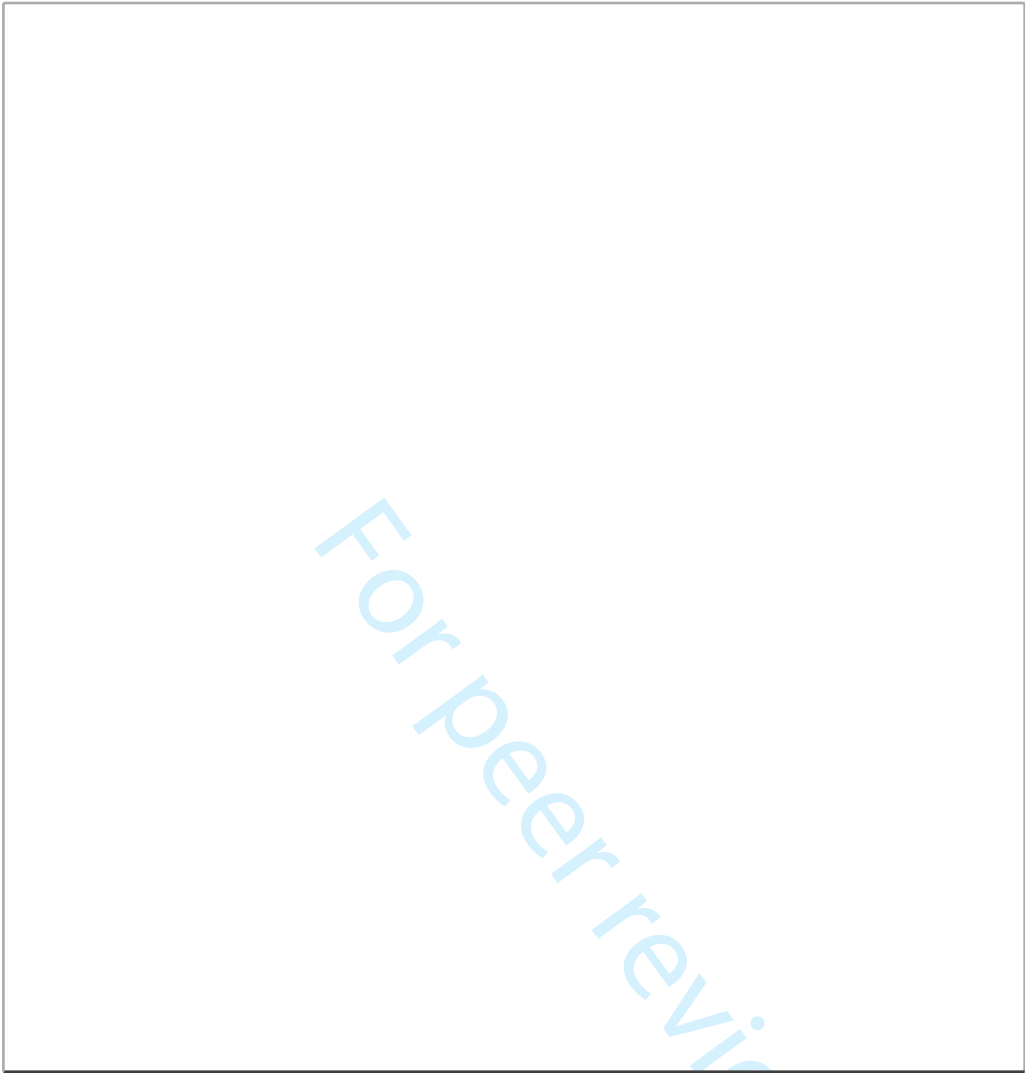

For peer review only

|                                                                                                                                                                                                                                                         |
|---------------------------------------------------------------------------------------------------------------------------------------------------------------------------------------------------------------------------------------------------------|
|                                                                                                                                                                                                                                                         |
| <b><i>Safety Checks and Documentation</i></b>                                                                                                                                                                                                           |
| Not specified                                                                                                                                                                                                                                           |
| Due to potential loss of medication (breakage or spillage) OR inadequate response it is recommended that additional supply of all medications (full doses) and supplies be on hand at the time of administration. Return unused medication to Pharmacy. |
| Unused medication must be secured, pharmacist must provide analysis of prescription                                                                                                                                                                     |

1  
2  
3  
4  
5  
6  
7  
8  
9  
10  
11  
12  
13  
14  
15  
16  
17  
18  
19  
20  
21  
22  
23  
24  
25  
26  
27  
28  
29  
30  
31  
32  
33  
34  
35  
36  
37  
38  
39  
40  
41  
42  
43  
44  
45  
46  
47  
48  
49  
50  
51  
52  
53  
54  
55  
56  
57  
58  
59  
60

The declaration of euthanasia must be made by the doctor within 4 working days

Law requires written and oral request from patient and consultation with another physician.

For peer review only

1  
2  
3  
4  
5  
6  
7  
8  
9  
10  
11  
12  
13  
14  
15  
16  
17  
18  
19  
20  
21  
22  
23  
24  
25  
26  
27  
28  
29  
30  
31  
32  
33  
34  
35  
36  
37  
38  
39  
40  
41  
42  
43  
44  
45  
46  
47  
48  
49  
50  
51  
52  
53  
54  
55  
56  
57  
58  
59  
60

|               |
|---------------|
| Not specified |
| Not specified |
| not specified |

For peer review only

1  
2  
3  
4  
5  
6  
7  
8  
9  
10  
11  
12  
13  
14  
15  
16  
17  
18  
19  
20  
21  
22  
23  
24  
25  
26  
27  
28  
29  
30  
31  
32  
33  
34  
35  
36  
37  
38  
39  
40  
41  
42  
43  
44  
45  
46  
47  
48  
49  
50  
51  
52  
53  
54  
55  
56  
57  
58  
59  
60

Not specified

Not specified

For peer review only

1  
2  
3  
4  
5  
6  
7  
8  
9  
10  
11  
12  
13  
14  
15  
16  
17  
18  
19  
20  
21  
22  
23  
24  
25  
26  
27  
28  
29  
30  
31  
32  
33  
34  
35  
36  
37  
38  
39  
40  
41  
42  
43  
44  
45  
46  
47  
48  
49  
50  
51  
52  
53  
54  
55  
56  
57  
58  
59  
60

Not specified

pharmacist has a duty to refuse to fill a prescription if in their professional judgment the prescription is outside the scope of practice of the prescriber;

For peer review only



1  
2  
3  
4  
5  
6  
7  
8  
9  
10  
11  
12  
13  
14  
15  
16  
17  
18  
19  
20  
21  
22  
23  
24  
25  
26  
27  
28  
29  
30  
31  
32  
33  
34  
35  
36  
37  
38  
39  
40  
41  
42  
43  
44  
45  
46  
47  
48  
49  
50  
51  
52  
53  
54  
55  
56  
57  
58  
59  
60

Not specified

Checklists and medical charts are randomly audited annually by the director of supportive care and specialty clinics

For peer review only

1  
2  
3  
4  
5  
6  
7  
8  
9  
10  
11  
12  
13  
14  
15  
16  
17  
18  
19  
20  
21  
22  
23  
24  
25  
26  
27  
28  
29  
30  
31  
32  
33  
34  
35  
36  
37  
38  
39  
40  
41  
42  
43  
44  
45  
46  
47  
48  
49  
50  
51  
52  
53  
54  
55  
56  
57  
58  
59  
60

|                                                                                                  |
|--------------------------------------------------------------------------------------------------|
| Pharmacist may refuse to dispense medication if they feel physician is not following guidelines. |
| Not specified                                                                                    |
| Not specified                                                                                    |
| not specified                                                                                    |

For peer review only

1  
2  
3  
4  
5  
6  
7  
8  
9  
10  
11  
12  
13  
14  
15  
16  
17  
18  
19  
20  
21  
22  
23  
24  
25  
26  
27  
28  
29  
30  
31  
32  
33  
34  
35  
36  
37  
38  
39  
40  
41  
42  
43  
44  
45  
46  
47  
48  
49  
50  
51  
52  
53  
54  
55  
56  
57  
58  
59  
60

Not specified

Not specified

For peer review only

1  
2  
3  
4  
5  
6  
7  
8  
9  
10  
11  
12  
13  
14  
15  
16  
17  
18  
19  
20  
21  
22  
23  
24  
25  
26  
27  
28  
29  
30  
31  
32  
33  
34  
35  
36  
37  
38  
39  
40  
41  
42  
43  
44  
45  
46  
47  
48  
49  
50  
51  
52  
53  
54  
55  
56  
57  
58  
59  
60

Not specified

Not specified

physicians must report all prescriptions written under the Act to the Oregon Department of Human Services (ODHS).

For peer review only

1  
2  
3  
4  
5  
6  
7  
8  
9  
10  
11  
12  
13  
14  
15  
16  
17  
18  
19  
20  
21  
22  
23  
24  
25  
26  
27  
28  
29  
30  
31  
32  
33  
34  
35  
36  
37  
38  
39  
40  
41  
42  
43  
44  
45  
46  
47  
48  
49  
50  
51  
52  
53  
54  
55  
56  
57  
58  
59  
60

|               |
|---------------|
| Not specified |
| Not specified |
| Not specified |

For peer review only

1  
2  
3  
4  
5  
6  
7  
8  
9  
10  
11  
12  
13  
14  
15  
16  
17  
18  
19  
20  
21  
22  
23  
24  
25  
26  
27  
28  
29  
30  
31  
32  
33  
34  
35  
36  
37  
38  
39  
40  
41  
42  
43  
44  
45  
46  
47  
48  
49  
50  
51  
52  
53  
54  
55  
56  
57  
58  
59  
60

|               |
|---------------|
| Not specified |
| Not specified |
| Not specified |
| Not specified |

For peer review only

1  
2  
3  
4  
5  
6  
7  
8  
9  
10  
11  
12  
13  
14  
15  
16  
17  
18  
19  
20  
21  
22  
23  
24  
25  
26  
27  
28  
29  
30  
31  
32  
33  
34  
35  
36  
37  
38  
39  
40  
41  
42  
43  
44  
45  
46  
47  
48  
49  
50  
51  
52  
53  
54  
55  
56  
57  
58  
59  
60

Not specified

Not specified

For peer review only

1  
2  
3  
4  
5  
6  
7  
8  
9  
10  
11  
12  
13  
14  
15  
16  
17  
18  
19  
20  
21  
22  
23  
24  
25  
26  
27  
28  
29  
30  
31  
32  
33  
34  
35  
36  
37  
38  
39  
40  
41  
42  
43  
44  
45  
46  
47  
48  
49  
50  
51  
52  
53  
54  
55  
56  
57  
58  
59  
60

|               |
|---------------|
| Not specified |
| Not specified |
| Not specified |
| Not specified |

For peer review only



1  
2  
3  
4  
5  
6  
7  
8  
9  
10  
11  
12  
13  
14  
15  
16  
17  
18  
19  
20  
21  
22  
23  
24  
25  
26  
27  
28  
29  
30  
31  
32  
33  
34  
35  
36  
37  
38  
39  
40  
41  
42  
43  
44  
45  
46  
47  
48  
49  
50  
51  
52  
53  
54  
55  
56  
57  
58  
59  
60

Not specified

All patients had access to optimal comfort care, including: pain control, psychological and psychosocial support. Patient repeatedly confirmed the decision.

Not specified

Not specified

Not specified

For peer review only

1  
2  
3  
4  
5  
6  
7  
8  
9  
10  
11  
12  
13  
14  
15  
16  
17  
18  
19  
20  
21  
22  
23  
24  
25  
26  
27  
28  
29  
30  
31  
32  
33  
34  
35  
36  
37  
38  
39  
40  
41  
42  
43  
44  
45  
46  
47  
48  
49  
50  
51  
52  
53  
54  
55  
56  
57  
58  
59  
60

|               |
|---------------|
| Not specified |
| Not specified |
| Not specified |

For peer review only

1  
2  
3  
4  
5  
6  
7  
8  
9  
10  
11  
12  
13  
14  
15  
16  
17  
18  
19  
20  
21  
22  
23  
24  
25  
26  
27  
28  
29  
30  
31  
32  
33  
34  
35  
36  
37  
38  
39  
40  
41  
42  
43  
44  
45  
46  
47  
48  
49  
50  
51  
52  
53  
54  
55  
56  
57  
58  
59  
60

|               |
|---------------|
| Not specified |

For peer review only

1  
2  
3  
4  
5  
6  
7  
8  
9  
10  
11  
12  
13  
14  
15  
16  
17  
18  
19  
20  
21  
22  
23  
24  
25  
26  
27  
28  
29  
30  
31  
32  
33  
34  
35  
36  
37  
38  
39  
40  
41  
42  
43  
44  
45  
46  
47  
48  
49  
50  
51  
52  
53  
54  
55  
56  
57  
58  
59  
60

|               |
|---------------|
| Not specified |
| Not specified |

For peer review only

1  
2  
3  
4  
5  
6  
7  
8  
9  
10  
11  
12  
13  
14  
15  
16  
17  
18  
19  
20  
21  
22  
23  
24  
25  
26  
27  
28  
29  
30  
31  
32  
33  
34  
35  
36  
37  
38  
39  
40  
41  
42  
43  
44  
45  
46  
47  
48  
49  
50  
51  
52  
53  
54  
55  
56  
57  
58  
59  
60

|               |
|---------------|
| Not specified |
| Not specified |
| Not specified |

For peer review only

1  
2  
3  
4  
5  
6  
7  
8  
9  
10  
11  
12  
13  
14  
15  
16  
17  
18  
19  
20  
21  
22  
23  
24  
25  
26  
27  
28  
29  
30  
31  
32  
33  
34  
35  
36  
37  
38  
39  
40  
41  
42  
43  
44  
45  
46  
47  
48  
49  
50  
51  
52  
53  
54  
55  
56  
57  
58  
59  
60

|               |
|---------------|
| Not specified |
| Not specified |

For peer review only

1  
2  
3  
4  
5  
6  
7  
8  
9  
10  
11  
12  
13  
14  
15  
16  
17  
18  
19  
20  
21  
22  
23  
24  
25  
26  
27  
28  
29  
30  
31  
32  
33  
34  
35  
36  
37  
38  
39  
40  
41  
42  
43  
44  
45  
46  
47  
48  
49  
50  
51  
52  
53  
54  
55  
56  
57  
58  
59  
60

Patient is not put on monitor, because PEA could misguide physician. Transplant coordinator preinforms the municipe coroner. No-touch period of five minutes is observed after administration of medication. Regional euthanasia review committee is informed by coronor and verifies whether physician has complied with due diligence.

Not specified

Not specified

For peer review only

1  
2 provision of information on  
3 reconstitution and administration  
4 of the injectable used for  
5 euthanasia / assisted suicide;  
6 Securing detention, including  
7 restitution unused drugs.  
8  
9  
10  
11  
12  
13  
14  
15  
16  
17  
18  
19  
20  
21  
22  
23  
24  
25  
26  
27  
28  
29  
30  
31  
32  
33  
34

35 Not specified  
36  
37  
38  
39  
40  
41  
42  
43  
44  
45  
46  
47  
48  
49  
50  
51  
52  
53  
54  
55  
56  
57  
58  
59  
60



1  
2  
3  
4  
5  
6  
7  
8  
9  
10  
11  
12  
13  
14  
15  
16  
17  
18  
19  
20  
21  
22  
23  
24  
25  
26  
27  
28  
29  
30  
31  
32  
33  
34  
35  
36  
37  
38  
39  
40  
41  
42  
43  
44  
45  
46  
47  
48  
49  
50  
51  
52  
53  
54  
55  
56  
57  
58  
59  
60

Not specified

Not specified

For peer review only

1  
2  
3  
4  
5  
6  
7  
8  
9  
10  
11  
12  
13  
14  
15  
16  
17  
18  
19  
20  
21  
22  
23  
24  
25  
26  
27  
28  
29  
30  
31  
32  
33  
34  
35  
36  
37  
38  
39  
40  
41  
42  
43  
44  
45  
46  
47  
48  
49  
50  
51  
52  
53  
54  
55  
56  
57  
58  
59  
60

Not specified

Not specified

For peer review only

1  
2  
3  
4  
5  
6  
7  
8  
9  
10  
11  
12  
13  
14  
15  
16  
17  
18  
19  
20  
21  
22  
23  
24  
25  
26  
27  
28  
29  
30  
31  
32  
33  
34  
35  
36  
37  
38  
39  
40  
41  
42  
43  
44  
45  
46  
47  
48  
49  
50  
51  
52  
53  
54  
55  
56  
57  
58  
59  
60

Not specified

Not specified

Not specified

For peer review only

1  
2  
3  
4  
5  
6  
7  
8  
9  
10  
11  
12  
13  
14  
15  
16  
17  
18  
19  
20  
21  
22  
23  
24  
25  
26  
27  
28  
29  
30  
31  
32  
33  
34  
35  
36  
37  
38  
39  
40  
41  
42  
43  
44  
45  
46  
47  
48  
49  
50  
51  
52  
53  
54  
55  
56  
57  
58  
59  
60

|                                                                              |
|------------------------------------------------------------------------------|
| <p>Not specified</p>                                                         |
| <p>Not specified</p>                                                         |
| <p>Not specified</p>                                                         |
| <p>The family doctor remains with the patients until death is confirmed.</p> |
| <p>Not specified</p>                                                         |

For peer review only

1  
2 It is recommended that euthanasia  
3 be performed within the schedule  
4 of one hospital shift. Moreover, the  
5 means to be used should be  
6 determined either as oral or as  
7 intravenous. If an oral drug is used,  
8 it should be obtained from the  
9 hospital pharmacy. If intravenous  
10 drugs are used, these should be  
11 administered in consultation with  
12 the head of the department of pain  
13 control.

14  
15  
16  
17  
18 The DWDA requires that the  
19 patient's written request be  
20 witnessed by at least two people  
21 who can verify that the patient is  
22 competent and that the decision is  
23 voluntary and informed. One of the  
24 witnesses must be impartial.<sup>44</sup> The  
25 mandatory presence of witnesses  
26 is intended to provide a degree of  
27 supervision and openness to what  
28 is alleged currently to be a  
29 clandestine practice of PAS.<sup>45</sup>  
30 Where the legislation is deficient,  
31 however, is in its failure to require  
32 that witnesses be present at other  
33 important instances throughout  
34 the decision-making process  
35 including, in particular, the time  
36 when the patient takes the lethal  
37 dose. Indeed, the process after the  
38 patient receives the lethal  
39 prescription is wholly unregulated.  
40 physicians are  
41 required to maintain records and  
42 to report cases in which they have  
43 written lethal prescriptions

1  
2  
3  
4  
5  
6  
7  
8  
9  
10  
11  
12  
13  
14  
15  
16  
17  
18  
19  
20  
21  
22  
23  
24  
25  
26  
27  
28  
29  
30  
31  
32  
33  
34  
35  
36  
37  
38  
39  
40  
41  
42  
43  
44  
45  
46  
47  
48  
49  
50  
51  
52  
53  
54  
55  
56  
57  
58  
59  
60

Not specified

Not specified

For peer review only

1  
2  
3  
4  
5  
6  
7  
8  
9  
10  
11  
12  
13  
14  
15  
16  
17  
18  
19  
20  
21  
22  
23  
24  
25  
26  
27  
28  
29  
30  
31  
32  
33  
34  
35  
36  
37  
38  
39  
40  
41  
42  
43  
44  
45  
46  
47  
48  
49  
50  
51  
52  
53  
54  
55  
56  
57  
58  
59  
60

|               |
|---------------|
| Not specified |
| Not specified |

For peer review only

1  
2  
3  
4  
5  
6  
7  
8  
9  
10  
11  
12  
13  
14  
15  
16  
17  
18  
19  
20  
21  
22  
23  
24  
25  
26  
27  
28  
29  
30  
31  
32  
33  
34  
35  
36  
37  
38  
39  
40  
41  
42  
43  
44  
45  
46  
47  
48  
49  
50  
51  
52  
53  
54  
55  
56  
57  
58  
59  
60

Hospital board was informed about euthanasia. Regional review committee reviewed case.

Not specified

For peer review only



1  
2  
3  
4  
5  
6  
7  
8  
9  
10  
11  
12  
13  
14  
15  
16  
17  
18  
19  
20  
21  
22  
23  
24  
25  
26  
27  
28  
29  
30  
31  
32  
33  
34  
35  
36  
37  
38  
39  
40  
41  
42  
43  
44  
45  
46  
47  
48  
49  
50  
51  
52  
53  
54  
55  
56  
57  
58  
59  
60

Not specified

Not specified

Not specified

For peer review only

1  
2  
3  
4  
5  
6  
7  
8  
9  
10  
11  
12  
13  
14  
15  
16  
17  
18  
19  
20  
21  
22  
23  
24  
25  
26  
27  
28  
29  
30  
31  
32  
33  
34  
35  
36  
37  
38  
39  
40  
41  
42  
43  
44  
45  
46  
47  
48  
49  
50  
51  
52  
53  
54  
55  
56  
57  
58  
59  
60

Not specified

Not specified

Not specified

For peer review only

1  
2  
3  
4  
5  
6  
7  
8  
9  
10  
11  
12  
13  
14  
15  
16  
17  
18  
19  
20  
21  
22  
23  
24  
25  
26  
27  
28  
29  
30  
31  
32  
33  
34  
35  
36  
37  
38  
39  
40  
41  
42  
43  
44  
45  
46  
47  
48  
49  
50  
51  
52  
53  
54  
55  
56  
57  
58  
59  
60

|               |
|---------------|
| Not specified |
| Not specified |
| Not specified |

For peer review only

1  
2 Physicians report cases to review  
3 committee using legally defined  
4 registration form. In the  
5 netherlands, a medical examiner  
6 examines the body to determine  
7 how euthansia was performed.  
8  
9

10  
11  
12  
13  
14  
15  
16  
17  
18  
19  
20  
21  
22  
23  
24  
25  
26  
27  
28  
29  
30  
31  
32  
33  
34  
35  
36 Physician reports case for review to  
37 Federal Control and Evaluation  
38 Committee Euthanasia.  
39  
40  
41  
42  
43  
44  
45  
46  
47  
48  
49  
50  
51  
52  
53  
54  
55  
56  
57  
58  
59  
60

1  
2  
3  
4  
5  
6  
7  
8  
9  
10  
11  
12  
13  
14  
15  
16  
17  
18  
19  
20  
21  
22  
23  
24  
25  
26  
27  
28  
29  
30  
31  
32  
33  
34  
35  
36  
37  
38  
39  
40  
41  
42  
43  
44  
45  
46  
47  
48  
49  
50  
51  
52  
53  
54  
55  
56  
57  
58  
59  
60

Physician must report case to Federal Control and Evaluation Committee.

Physician must inform the patient about their condition and life expectancy. Physician must consult a second physician independent from patient and attending. Physician must report decision-making process in medical file, and report case to Federal Control and Evaluation Committee Euthanasia

For peer review only

1  
2  
3  
4  
5  
6  
7  
8  
9  
10  
11  
12  
13  
14  
15  
16  
17  
18  
19  
20  
21  
22  
23  
24  
25  
26  
27  
28  
29  
30  
31  
32  
33  
34  
35  
36  
37  
38  
39  
40  
41  
42  
43  
44  
45  
46  
47  
48  
49  
50  
51  
52  
53  
54  
55  
56  
57  
58  
59  
60

Not specified

Not specified

For peer review only

1  
2  
3  
4  
5  
6  
7  
8  
9  
10  
11  
12  
13  
14  
15  
16  
17  
18  
19  
20  
21  
22  
23  
24  
25  
26  
27  
28  
29  
30  
31  
32  
33  
34  
35  
36  
37  
38  
39  
40  
41  
42  
43  
44  
45  
46  
47  
48  
49  
50  
51  
52  
53  
54  
55  
56  
57  
58  
59  
60

Not specified

Physician must report cases of euthanasia or physician-assisted suicide to a regional review committee.

For peer review only

1  
2  
3  
4  
5  
6  
7  
8  
9  
10  
11  
12  
13  
14  
15  
16  
17  
18  
19  
20  
21  
22  
23  
24  
25  
26  
27  
28  
29  
30  
31  
32  
33  
34  
35  
36  
37  
38  
39  
40  
41  
42  
43  
44  
45  
46  
47  
48  
49  
50  
51  
52  
53  
54  
55  
56  
57  
58  
59  
60

Not specified

For peer review only



1  
2  
3  
4  
5  
6  
7  
8  
9  
10  
11  
12  
13  
14  
15  
16  
17  
18  
19  
20  
21  
22  
23  
24  
25  
26  
27  
28  
29  
30  
31  
32  
33  
34  
35  
36  
37  
38  
39  
40  
41  
42  
43  
44  
45  
46  
47  
48  
49  
50  
51  
52  
53  
54  
55  
56  
57  
58  
59  
60

Not specified

For peer review only

1  
2  
3  
4  
5  
6  
7  
8  
9  
10  
11  
12  
13  
14  
15  
16  
17  
18  
19  
20  
21  
22  
23  
24  
25  
26  
27  
28  
29  
30  
31  
32  
33  
34  
35  
36  
37  
38  
39  
40  
41  
42  
43  
44  
45  
46  
47  
48  
49  
50  
51  
52  
53  
54  
55  
56  
57  
58  
59  
60

Not specified

For peer review only

1  
2  
3  
4  
5  
6  
7  
8  
9  
10  
11  
12  
13  
14  
15  
16  
17  
18  
19  
20  
21  
22  
23  
24  
25  
26  
27  
28  
29  
30  
31  
32  
33  
34  
35  
36  
37  
38  
39  
40  
41  
42  
43  
44  
45  
46  
47  
48  
49  
50  
51  
52  
53  
54  
55  
56  
57  
58  
59  
60

Not specified

Not specified

Switzerland - Volunteer re-assesses patient's decisional capacity. Volunteer must notify police at time of death.  
Oregon - not specified

For peer review only

1  
2 Standardized layout of medication  
3 box, with photographs. Reference  
4 document outlines storage, advise  
5 effects, allergy risk, loss of venous  
6 access, and a checklist to ensure  
7 appropriate equipment is available.  
8  
9 A second kit, which may be useful  
10 in the event of damage or  
11 improper handling, must be  
12 systematically prepared and sealed  
13 by the pharmacist and given to the  
14 physician. It must contain the same  
15 set of medications and material  
16 prescribed by the physician as the  
17 original kit.  
18  
19  
20  
21  
22  
23  
24  
25  
26  
27  
28  
29  
30  
31  
32  
33  
34  
35  
36  
37  
38  
39  
40  
41  
42  
43  
44  
45  
46  
47  
48  
49  
50  
51  
52  
53  
54  
55  
56  
57  
58  
59  
60

1  
2 Labeling of all drugs with patient  
3 name and dose. Informing patients  
4 of possibility of pain. IV will be  
5 used if patient does not die within  
6 2 hours of oral administration.  
7 Prepare patient for foul taste.  
8 Contact anesthesia if patient  
9 weight greater than 150 kg for  
10 revised doses. SEcond backup set  
11 required.  
12  
13  
14  
15  
16  
17  
18  
19  
20  
21  
22  
23  
24  
25  
26  
27  
28  
29  
30  
31  
32  
33  
34  
35

36 Physician must know the person  
37 who wishes to die, must ensure the  
38 choice was freely made, and must  
39 confirm the severity of the disorder  
40 . Specific safety checks not  
41 specified.  
42  
43  
44  
45  
46  
47  
48  
49  
50  
51  
52  
53  
54  
55  
56  
57  
58  
59  
60

1  
2 IV check— 4 hours prior, 18 to 20g.  
3 Check for coma prior to NMB.  
4 Check of appropriate eligibility and  
5 legal safeguards as per C-14  
6  
7  
8  
9  
10  
11  
12  
13  
14  
15  
16  
17  
18  
19  
20  
21  
22  
23  
24  
25  
26  
27  
28  
29  
30  
31  
32  
33  
34  
35  
36  
37  
38  
39  
40  
41  
42  
43  
44  
45  
46  
47  
48  
49  
50  
51  
52  
53  
54  
55  
56  
57  
58  
59  
60

For peer review only

1  
2  
3  
4  
5  
6  
7  
8  
9  
10  
11  
12  
13  
14  
15  
16  
17  
18  
19  
20  
21  
22  
23  
24  
25  
26  
27  
28  
29  
30  
31  
32  
33  
34  
35  
36  
37  
38  
39  
40  
41  
42  
43  
44  
45  
46  
47  
48  
49  
50  
51  
52  
53  
54  
55  
56  
57  
58  
59  
60

Form 2020 to be completed and or  
MAID coordinator. Call to TGLN.  
Coroner called by physician.

Copy of consent attached to  
prescription, confirm adequate  
vascular access prior to procedure,  
one of PICC line, central IV, saline  
lock with 18g catheter, with second  
site available. Physician to  
document all medication on MAID-  
MAR, and one copy of MAID mar to  
stay with patient, one to  
pharmacy.

Not specified

For peer review only

1  
2 Two kits dispensed for lidocaine,  
3 propofol  
4  
5  
6  
7  
8

9 Not specified  
10  
11  
12  
13  
14  
15  
16  
17  
18  
19  
20  
21  
22  
23  
24  
25  
26  
27  
28  
29  
30  
31  
32  
33  
34  
35  
36  
37  
38  
39  
40  
41  
42

43 Pre-procedure requirements,  
44 including administrative checklist  
45 for release of medication, DNAR  
46 order, request form, signed  
47 consent, organ and tissue donation  
48 discussed with in-hospital patient,  
49 call to family & patient to confirm  
50 date and time, special requests,  
51 detailed of supports required,  
52 equipment needs identified, and  
53 pre procedure huddle for HCPs.  
54 Pharmacists sign prescriber form at  
55 time of dispensing.  
56  
57  
58  
59  
60



1  
2 Prescriber to sign pharmacy  
3 services medications for MAiD  
4 dispensing record. Checklist for  
5 order set— social work, two  
6 peripheral IVs, no vital sign  
7 monitoring

8  
9 Not specified  
10  
11  
12  
13  
14  
15  
16  
17  
18  
19  
20  
21  
22  
23  
24  
25  
26  
27  
28

29 - Verification form signed by  
30 physician and pharmacist prior to  
31 procedure  
32  
33 - Detailed checklist of all  
34 medications to be given in order,  
35 to be confirmed with initial from  
36 pharmacist and physician  
37  
38 - 2 identical IV kits in  
39 sealed/tamperproof container  
40 must be available at start of  
41 procedure  
42  
43 - If patient chooses oral protocol,  
44 IV protocol must be available for  
45 use in case of ineffectiveness,  
46 patient must have signed consent  
47 to this prior to procedure.  
48  
49 - Charting of remaining unused  
50 medications  
51  
52 - medication administration record  
53 with doses, times, prescriber  
54 initials, and patient name  
55 birthdate, health number  
56  
57  
58  
59  
60

|    |                                       |
|----|---------------------------------------|
| 1  |                                       |
| 2  |                                       |
| 3  | - Verification form signed by         |
| 4  | physician and pharmacist prior to     |
| 5  | procedure                             |
| 6  | - Detailed checklist of all           |
| 7  | medications to be given in order,     |
| 8  | to be confirmed with initial from     |
| 9  | pharmacist and physician              |
| 10 |                                       |
| 11 | - If patient chooses oral protocol,   |
| 12 | IV protocol must be available for     |
| 13 | use in case of ineffectiveness,       |
| 14 | patient must have signed consent      |
| 15 | to this prior to procedure.           |
| 16 |                                       |
| 17 | - Additional quantities of            |
| 18 | medications to be specified           |
| 19 |                                       |
| 20 | Prescription has a checklist of       |
| 21 | eligibility criteria, with places for |
| 22 | the prescribing physician to initial, |
| 23 | as well as a pharmacist signature.    |
| 24 |                                       |
| 25 | provincial MAID team to be            |
| 26 | contacted if patient over 250 kg, or  |
| 27 | if allergies exist. patient consent   |
| 28 | form to be signed on day of           |
| 29 | provision.                            |
| 30 |                                       |
| 31 | Not specified                         |
| 32 |                                       |
| 33 |                                       |
| 34 |                                       |
| 35 |                                       |
| 36 |                                       |
| 37 |                                       |
| 38 |                                       |
| 39 |                                       |
| 40 |                                       |
| 41 |                                       |
| 42 |                                       |
| 43 |                                       |
| 44 |                                       |
| 45 |                                       |
| 46 |                                       |
| 47 |                                       |
| 48 |                                       |
| 49 |                                       |
| 50 |                                       |
| 51 |                                       |
| 52 |                                       |
| 53 |                                       |
| 54 |                                       |
| 55 |                                       |
| 56 |                                       |
| 57 |                                       |
| 58 |                                       |
| 59 |                                       |
| 60 |                                       |

1  
2 Copy of signed consent required  
3 for dispensing; MAID MAR  
4 completed with the pharmacist,  
5 return of unused medication or  
6 material and any empty packaging  
7 and syringes to pharmacy after  
8 MAID completed  
9  
10  
11  
12  
13  
14  
15  
16  
17  
18  
19  
20  
21  
22  
23  
24  
25  
26  
27  
28  
29  
30  
31  
32  
33  
34

35  
36 Confirmation on prescription that  
37 patient meets criteria for MAID.  
38 Date and time of administration of  
39 protocol; main and backup kits  
40 prepared ; time required to  
41 prepare medications; discussion of  
42 storage and stability; discuss  
43 process to complete MAR; discuss  
44 process of retiring used and  
45 unused kits to pharmacy  
46  
47  
48  
49  
50  
51  
52  
53  
54  
55  
56  
57  
58  
59  
60

1  
2 Not specified  
3  
4  
5  
6  
7  
8  
9  
10  
11  
12  
13  
14  
15  
16  
17  
18  
19  
20  
21  
22  
23  
24  
25

26 Not specified  
27  
28  
29  
30  
31  
32  
33  
34  
35  
36  
37  
38  
39  
40  
41  
42  
43

44 When a death occurs in the context  
45 of assistance to suicide, the  
46 situation must be reported to the  
47 authority. The judicial police and  
48 the international medical examiner  
49 then come to the place of death for  
50 context check  
51  
52  
53  
54  
55  
56  
57  
58  
59  
60

1  
2  
3  
4  
5  
6  
7  
8  
9  
10  
11  
12  
13  
14  
15  
16  
17  
18  
19  
20  
21  
22  
23  
24  
25  
26  
27  
28  
29  
30  
31  
32  
33  
34  
35  
36  
37  
38  
39  
40  
41  
42  
43  
44  
45  
46  
47  
48  
49  
50  
51  
52  
53  
54  
55  
56  
57  
58  
59  
60

Not specified

Not specified

For peer review only

1  
2 Physician reassesses patient's  
3 determination before carrying out  
4 MAID.  
5  
6  
7  
8  
9  
10  
11  
12  
13  
14  
15  
16  
17

18  
19 In 50% of people who received  
20 euthanasia, the attending physician  
21 had followed PC training or was  
22 working in a palliative team.  
23  
24  
25  
26  
27  
28  
29  
30  
31  
32  
33  
34  
35  
36  
37  
38  
39  
40  
41  
42  
43

44 - Only physicians are legally  
45 allowed to administer lethal drugs  
46 - Only physicians have the  
47 authority to make the decision to  
48 perform euthanasia  
49  
50  
51  
52  
53  
54  
55  
56  
57  
58  
59  
60

1  
2  
3  
4  
5  
6  
7  
8  
9  
10  
11  
12  
13  
14  
15  
16  
17  
18  
19  
20  
21  
22  
23  
24  
25  
26  
27  
28  
29  
30  
31  
32  
33  
34  
35  
36  
37  
38  
39  
40  
41  
42  
43  
44  
45  
46  
47  
48  
49  
50  
51  
52  
53  
54  
55  
56  
57  
58  
59  
60

Pharmacists complete and submit pharmacy dispensing record form. Physician must notify pharmacist in advance.

Not specified

For peer review only

1  
2 Law outlines requirements prior to  
3 prescription being written, but  
4 outlines no procedures for after  
5 medication is dispensed. Physician  
6 not required to be present for  
7 ingestion. Prescribing physician  
8 must file documentation in a  
9 timely manner, and must wait 48  
10 hours after written request before  
11 writing prescription.  
12  
13  
14  
15  
16  
17  
18  
19  
20

21 Not specified  
22  
23  
24  
25  
26  
27  
28  
29  
30  
31  
32  
33  
34  
35  
36  
37  
38  
39  
40  
41  
42  
43  
44  
45  
46  
47  
48  
49  
50  
51  
52  
53  
54  
55  
56  
57  
58  
59  
60



1  
2  
3  
4  
5  
6  
7  
8  
9  
10  
11  
12  
13  
14  
15  
16  
17  
18  
19  
20  
21  
22  
23  
24  
25  
26  
27  
28  
29  
30  
31  
32  
33  
34  
35  
36  
37  
38  
39  
40  
41  
42  
43  
44  
45  
46  
47  
48  
49  
50  
51  
52  
53  
54  
55  
56  
57  
58  
59  
60

Safety checks for provision not specified. Safety checks discussed relate to evaluation of MAID request.

Not specified

Not specified

For peer review only

1  
2  
3  
4  
5  
6  
7  
8  
9  
10  
11  
12  
13  
14  
15  
16  
17  
18  
19  
20  
21  
22  
23  
24  
25  
26  
27  
28  
29  
30  
31  
32  
33  
34  
35  
36  
37  
38  
39  
40  
41  
42  
43  
44  
45  
46  
47  
48  
49  
50  
51  
52  
53  
54  
55  
56  
57  
58  
59  
60

|                                                                                          |
|------------------------------------------------------------------------------------------|
| Not specified                                                                            |
| Not specified                                                                            |
| Physicians are required to report each case of euthanasia to a federal review committee. |

For peer review only

1  
2  
3  
4  
5  
6  
7  
8  
9  
10  
11  
12  
13  
14  
15  
16  
17  
18  
19  
20  
21  
22  
23  
24  
25  
26  
27  
28  
29  
30  
31  
32  
33  
34  
35  
36  
37  
38  
39  
40  
41  
42  
43  
44  
45  
46  
47  
48  
49  
50  
51  
52  
53  
54  
55  
56  
57  
58  
59  
60

Not specified

Physicians must rule out situational depression or frontotemporal dementia.

For peer review only

1  
2  
3  
4  
5  
6  
7  
8  
9  
10  
11  
12  
13  
14  
15  
16  
17  
18  
19  
20  
21  
22  
23  
24  
25  
26  
27  
28  
29  
30  
31  
32  
33  
34  
35  
36  
37  
38  
39  
40  
41  
42  
43  
44  
45  
46  
47  
48  
49  
50  
51  
52  
53  
54  
55  
56  
57  
58  
59  
60

Not specified

Procedure Administration record with name, DOB, date, attending physicia/NP, checks for ICF, patient and attendant education, phones turned off, ICD off, IV documentation. Sample consent form provided.

For peer review only

1  
2  
3  
4  
5  
6  
7  
8  
9  
10  
11  
12  
13  
14  
15  
16  
17  
18  
19  
20  
21  
22  
23  
24  
25  
26  
27  
28  
29  
30  
31  
32  
33  
34  
35  
36  
37  
38  
39  
40  
41  
42  
43  
44  
45  
46  
47  
48  
49  
50  
51  
52  
53  
54  
55  
56  
57  
58  
59  
60

A clear separation between the euthanasia request, the euthanasia procedure and the organ procurement procedure was judged necessary.

For peer review only

1  
2  
3  
4  
5  
6  
7  
8  
9  
10  
11  
12  
13  
14  
15  
16  
17  
18  
19  
20  
21  
22  
23  
24  
25  
26  
27  
28  
29  
30  
31  
32  
33  
34  
35  
36  
37  
38  
39  
40  
41  
42  
43  
44  
45  
46  
47  
48  
49  
50  
51  
52  
53  
54  
55  
56  
57  
58  
59  
60

Not specified

For peer review only

1  
2  
3  
4  
5  
6  
7  
8  
9  
10  
11  
12  
13  
14  
15  
16  
17  
18  
19  
20  
21  
22  
23  
24  
25  
26  
27  
28  
29  
30  
31  
32  
33  
34  
35  
36  
37  
38  
39  
40  
41  
42  
43  
44  
45  
46  
47  
48  
49  
50  
51  
52  
53  
54  
55  
56  
57  
58  
59  
60

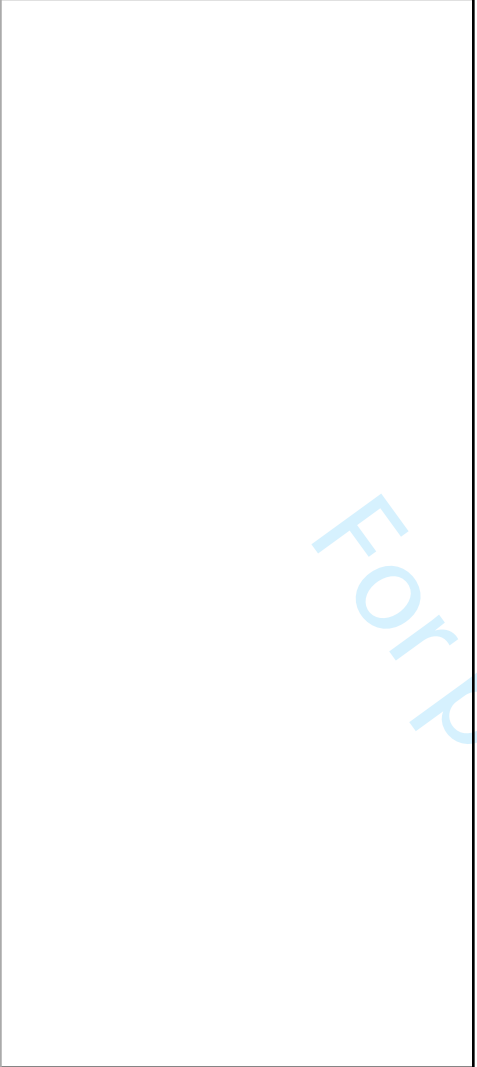

For peer review only

1  
2  
3  
4  
5  
6  
7  
8  
9  
10  
11  
12  
13  
14  
15  
16  
17  
18  
19  
20  
21  
22  
23  
24  
25  
26  
27  
28  
29  
30  
31  
32  
33  
34  
35  
36  
37  
38  
39  
40  
41  
42  
43  
44  
45  
46  
47  
48  
49  
50  
51  
52  
53  
54  
55  
56  
57  
58  
59  
60

|                                      |
|--------------------------------------|
| <b>MAID Provision: Location</b>      |
| <b><i>Location</i></b>               |
|                                      |
| Not specified                        |
| Hospital (most likely, if legalized) |

For peer review only



1  
2  
3  
4  
5  
6  
7  
8  
9  
10  
11  
12  
13  
14  
15  
16  
17  
18  
19  
20  
21  
22  
23  
24  
25  
26  
27  
28  
29  
30  
31  
32  
33  
34  
35  
36  
37  
38  
39  
40  
41  
42  
43  
44  
45  
46  
47  
48  
49  
50  
51  
52  
53  
54  
55  
56  
57  
58  
59  
60

Home, hospital, hospice

Not specified

For peer review only

1  
2  
3  
4  
5  
6  
7  
8  
9  
10  
11  
12  
13  
14  
15  
16  
17  
18  
19  
20  
21  
22  
23  
24  
25  
26  
27  
28  
29  
30  
31  
32  
33  
34  
35  
36  
37  
38  
39  
40  
41  
42  
43  
44  
45  
46  
47  
48  
49  
50  
51  
52  
53  
54  
55  
56  
57  
58  
59  
60

Not specified

Not specified

Hospital

For peer review only

1  
2  
3  
4  
5  
6  
7  
8  
9  
10  
11  
12  
13  
14  
15  
16  
17  
18  
19  
20  
21  
22  
23  
24  
25  
26  
27  
28  
29  
30  
31  
32  
33  
34  
35  
36  
37  
38  
39  
40  
41  
42  
43  
44  
45  
46  
47  
48  
49  
50  
51  
52  
53  
54  
55  
56  
57  
58  
59  
60

Hospital

Home

For peer review only

1  
2  
3  
4  
5  
6  
7  
8  
9  
10  
11  
12  
13  
14  
15  
16  
17  
18  
19  
20  
21  
22  
23  
24  
25  
26  
27  
28  
29  
30  
31  
32  
33  
34  
35  
36  
37  
38  
39  
40  
41  
42  
43  
44  
45  
46  
47  
48  
49  
50  
51  
52  
53  
54  
55  
56  
57  
58  
59  
60

Not specified

Not specified

For peer review only

1  
2  
3  
4  
5  
6  
7  
8  
9  
10  
11  
12  
13  
14  
15  
16  
17  
18  
19  
20  
21  
22  
23  
24  
25  
26  
27  
28  
29  
30  
31  
32  
33  
34  
35  
36  
37  
38  
39  
40  
41  
42  
43  
44  
45  
46  
47  
48  
49  
50  
51  
52  
53  
54  
55  
56  
57  
58  
59  
60

Hospital (50%), Home, (45%)

Home, hospice

For peer review only

1  
2  
3  
4  
5  
6  
7  
8  
9  
10  
11  
12  
13  
14  
15  
16  
17  
18  
19  
20  
21  
22  
23  
24  
25  
26  
27  
28  
29  
30  
31  
32  
33  
34  
35  
36  
37  
38  
39  
40  
41  
42  
43  
44  
45  
46  
47  
48  
49  
50  
51  
52  
53  
54  
55  
56  
57  
58  
59  
60

Not specified

Not specified

Not specified

Hospital or NGO Headquarters

For peer review only

1  
2  
3  
4  
5  
6  
7  
8  
9  
10  
11  
12  
13  
14  
15  
16  
17  
18  
19  
20  
21  
22  
23  
24  
25  
26  
27  
28  
29  
30  
31  
32  
33  
34  
35  
36  
37  
38  
39  
40  
41  
42  
43  
44  
45  
46  
47  
48  
49  
50  
51  
52  
53  
54  
55  
56  
57  
58  
59  
60

Not specified

Home, hospice

For peer review only

1  
2  
3  
4  
5  
6  
7  
8  
9  
10  
11  
12  
13  
14  
15  
16  
17  
18  
19  
20  
21  
22  
23  
24  
25  
26  
27  
28  
29  
30  
31  
32  
33  
34  
35  
36  
37  
38  
39  
40  
41  
42  
43  
44  
45  
46  
47  
48  
49  
50  
51  
52  
53  
54  
55  
56  
57  
58  
59  
60

Not specified

Home, Hospital

Home, nursing home, hospital

For peer review only



1  
2  
3  
4  
5  
6  
7  
8  
9  
10  
11  
12  
13  
14  
15  
16  
17  
18  
19  
20  
21  
22  
23  
24  
25  
26  
27  
28  
29  
30  
31  
32  
33  
34  
35  
36  
37  
38  
39  
40  
41  
42  
43  
44  
45  
46  
47  
48  
49  
50  
51  
52  
53  
54  
55  
56  
57  
58  
59  
60

|               |
|---------------|
| Not specified |
| Not specified |
| Not specified |

For peer review only

1  
2 Institution, Home  
3  
4  
5  
6  
7  
8  
9  
10  
11  
12  
13  
14  
15  
16  
17  
18  
19  
20  
21  
22  
23  
24  
25  
26  
27  
28  
29

30 Not specified  
31  
32  
33  
34  
35  
36  
37  
38  
39  
40  
41

42 Not specified  
43  
44  
45  
46  
47  
48  
49  
50

51 Death by ingestion of independently taking lethal medication attended by a confidant always  
52 occurred at home.  
53  
54  
55  
56  
57  
58  
59  
60

1  
2  
3  
4  
5  
6  
7  
8  
9  
10  
11  
12  
13  
14  
15  
16  
17  
18  
19  
20  
21  
22  
23  
24  
25  
26  
27  
28  
29  
30  
31  
32  
33  
34  
35  
36  
37  
38  
39  
40  
41  
42  
43  
44  
45  
46  
47  
48  
49  
50  
51  
52  
53  
54  
55  
56  
57  
58  
59  
60

Not specified

Not specified

For peer review only

1  
2 Not specified  
3  
4  
5  
6  
7  
8  
9  
10  
11  
12  
13  
14  
15  
16  
17  
18  
19  
20  
21  
22  
23  
24  
25  
26  
27  
28  
29  
30  
31  
32  
33  
34

35  
36 Not specified  
37  
38  
39  
40  
41  
42  
43  
44

45 Home (94%), Long-term care, assisted living, or foster care (5%), hospital (1%)  
46  
47

48 Twenty patients died at home, and one died in an acute care hospital with the hospital's  
49 permission.  
50  
51  
52  
53  
54  
55  
56  
57  
58  
59  
60

1  
2  
3  
4  
5  
6  
7  
8  
9  
10  
11  
12  
13  
14  
15  
16  
17  
18  
19  
20  
21  
22  
23  
24  
25  
26  
27  
28  
29  
30  
31  
32  
33  
34  
35  
36  
37  
38  
39  
40  
41  
42  
43  
44  
45  
46  
47  
48  
49  
50  
51  
52  
53  
54  
55  
56  
57  
58  
59  
60

Not specified

Hospital (supportive care unit)

Not specified

Among the 32 patients who received a lethal prescription, 13 (41%) were at home at the time of the request, none were reported as having been in the hospital, and 19 (59%) of the data points were missing.

Not specified

1  
2  
3  
4  
5  
6  
7  
8  
9  
10  
11  
12  
13  
14  
15  
16  
17  
18  
19  
20  
21  
22  
23  
24  
25  
26  
27  
28  
29  
30  
31  
32  
33  
34  
35  
36  
37  
38  
39  
40  
41  
42  
43  
44  
45  
46  
47  
48  
49  
50  
51  
52  
53  
54  
55  
56  
57  
58  
59  
60

Not specified

Not specified

Not specified

For peer review only

1  
2  
3  
4  
5  
6  
7  
8  
9  
10  
11  
12  
13  
14  
15  
16  
17  
18  
19  
20  
21  
22  
23  
24  
25  
26  
27  
28  
29  
30  
31  
32  
33  
34  
35  
36  
37  
38  
39  
40  
41  
42  
43  
44  
45  
46  
47  
48  
49  
50  
51  
52  
53  
54  
55  
56  
57  
58  
59  
60

Not specified

Home (70%), remainder were hospital and nursing home

The place of death was at home for 81% of the cases in the Netherlands, and 42% in Belgium. In Belgium, euthanasia more often took place in hospital (52% vs.9% in the Netherlands).

Not specified

Not specified

Not specified

For peer review only

1  
2  
3  
4  
5  
6  
7  
8  
9  
10  
11  
12  
13  
14  
15  
16  
17  
18  
19  
20  
21  
22  
23  
24  
25  
26  
27  
28  
29  
30  
31  
32  
33  
34  
35  
36  
37  
38  
39  
40  
41  
42  
43  
44  
45  
46  
47  
48  
49  
50  
51  
52  
53  
54  
55  
56  
57  
58  
59  
60

Not specified

Not specified

For peer review only



1  
2  
3  
4  
5  
6  
7  
8  
9  
10  
11  
12  
13  
14  
15  
16  
17  
18  
19  
20  
21  
22  
23  
24  
25  
26  
27  
28  
29  
30  
31  
32  
33  
34  
35  
36  
37  
38  
39  
40  
41  
42  
43  
44  
45  
46  
47  
48  
49  
50  
51  
52  
53  
54  
55  
56  
57  
58  
59  
60

Like in the United States, health care institutions in The Netherlands will become the end-of-life setting for many patients.

Not specified

Not specified

For peer review only

1  
2  
3  
4  
5  
6  
7  
8  
9  
10  
11  
12  
13  
14  
15  
16  
17  
18  
19  
20  
21  
22  
23  
24  
25  
26  
27  
28  
29  
30  
31  
32  
33  
34  
35  
36  
37  
38  
39  
40  
41  
42  
43  
44  
45  
46  
47  
48  
49  
50  
51  
52  
53  
54  
55  
56  
57  
58  
59  
60

Not specified

Not specified

For peer review only

1  
2  
3  
4  
5  
6  
7  
8  
9  
10  
11  
12  
13  
14  
15  
16  
17  
18  
19  
20  
21  
22  
23  
24  
25  
26  
27  
28  
29  
30  
31  
32  
33  
34  
35  
36  
37  
38  
39  
40  
41  
42  
43  
44  
45  
46  
47  
48  
49  
50  
51  
52  
53  
54  
55  
56  
57  
58  
59  
60

Hospitals

Not specified

Forty-six (4.7%) were in long-term care facilities when they self-administered, and 1 individual was a hospital inpatient. Between 2001 and 2015, 855(93.5%) patients notified families of their intention to use DWDA medication, and 928(94.0%) took the medicine at home.

For peer review only

1  
2  
3  
4  
5  
6  
7  
8  
9  
10  
11  
12  
13  
14  
15  
16  
17  
18  
19  
20  
21  
22  
23  
24  
25  
26  
27  
28  
29  
30  
31  
32  
33  
34  
35  
36  
37  
38  
39  
40  
41  
42  
43  
44  
45  
46  
47  
48  
49  
50  
51  
52  
53  
54  
55  
56  
57  
58  
59  
60

Not specified

Nursing home, hospital

For peer review only

1  
2  
3  
4  
5  
6  
7  
8  
9  
10  
11  
12  
13  
14  
15  
16  
17  
18  
19  
20  
21  
22  
23  
24  
25  
26  
27  
28  
29  
30  
31  
32  
33  
34  
35  
36  
37  
38  
39  
40  
41  
42  
43  
44  
45  
46  
47  
48  
49  
50  
51  
52  
53  
54  
55  
56  
57  
58  
59  
60

Not specified

Not specified

For peer review only

1  
2  
3  
4  
5  
6  
7  
8  
9  
10  
11  
12  
13  
14  
15  
16  
17  
18  
19  
20  
21  
22  
23  
24  
25  
26  
27  
28  
29  
30  
31  
32  
33  
34  
35  
36  
37  
38  
39  
40  
41  
42  
43  
44  
45  
46  
47  
48  
49  
50  
51  
52  
53  
54  
55  
56  
57  
58  
59  
60

Home, hospital, care home

Not specified

For peer review only

1  
2  
3  
4  
5  
6  
7  
8  
9  
10  
11  
12  
13  
14  
15  
16  
17  
18  
19  
20  
21  
22  
23  
24  
25  
26  
27  
28  
29  
30  
31  
32  
33  
34  
35  
36  
37  
38  
39  
40  
41  
42  
43  
44  
45  
46  
47  
48  
49  
50  
51  
52  
53  
54  
55  
56  
57  
58  
59  
60

Not specified

Not specified

For peer review only

Not specified

1  
2 Not specified  
3  
4  
5  
6  
7  
8  
9  
10  
11  
12  
13  
14  
15  
16  
17  
18  
19  
20  
21

22 Home, Hospital, Nursing Homes  
23  
24  
25  
26  
27  
28  
29  
30  
31  
32

33 Mostly performed at home by family physician. In case of DCD donation, performed in an operating  
34 room.  
35  
36  
37  
38  
39  
40  
41  
42

43 Not specified  
44  
45  
46  
47  
48

49 Almost all Dignitas members committed suicide at a flatrented by the right-to-die  
50 organisation for this purpose (94.5%)and only 5.1% at home. In one case (0.4%) a hotel  
51 room wasused. In contrast, Exit Deutsche Schweiz facilitated most of thesuicides at the  
52 member's own home (61.2%), one third (34.0%)in the organisation's apartment and only a  
53 small proportion(4.8%) in institutions such as a hospital or nursing home.  
54  
55  
56  
57  
58  
59  
60



1  
2  
3  
4  
5  
6  
7  
8  
9  
10  
11  
12  
13  
14  
15  
16  
17  
18  
19  
20  
21  
22  
23  
24  
25  
26  
27  
28  
29  
30  
31  
32  
33  
34  
35  
36  
37  
38  
39  
40  
41  
42  
43  
44  
45  
46  
47  
48  
49  
50  
51  
52  
53  
54  
55  
56  
57  
58  
59  
60

Not specified

Not specified

For peer review only

1  
2  
3  
4  
5  
6  
7  
8  
9  
10  
11  
12  
13  
14  
15  
16  
17  
18  
19  
20  
21  
22  
23  
24  
25  
26  
27  
28  
29  
30  
31  
32  
33  
34  
35  
36  
37  
38  
39  
40  
41  
42  
43  
44  
45  
46  
47  
48  
49  
50  
51  
52  
53  
54  
55  
56  
57  
58  
59  
60

Not specified

Home, Hospital, Nursing Homes

For peer review only

1  
2  
3  
4  
5  
6  
7  
8  
9  
10  
11  
12  
13  
14  
15  
16  
17  
18  
19  
20  
21  
22  
23  
24  
25  
26  
27  
28  
29  
30  
31  
32  
33  
34  
35  
36  
37  
38  
39  
40  
41  
42  
43  
44  
45  
46  
47  
48  
49  
50  
51  
52  
53  
54  
55  
56  
57  
58  
59  
60

Not specified

Not specified

For peer review only

1  
2  
3  
4  
5  
6  
7  
8  
9  
10  
11  
12  
13  
14  
15  
16  
17  
18  
19  
20  
21  
22  
23  
24  
25  
26  
27  
28  
29  
30  
31  
32  
33  
34  
35  
36  
37  
38  
39  
40  
41  
42  
43  
44  
45  
46  
47  
48  
49  
50  
51  
52  
53  
54  
55  
56  
57  
58  
59  
60

Hospital (ICU)

Home, hospital, hospice, nursing home

For peer review only

1  
2  
3  
4  
5  
6  
7  
8  
9  
10  
11  
12  
13  
14  
15  
16  
17  
18  
19  
20  
21  
22  
23  
24  
25  
26  
27  
28  
29  
30  
31  
32  
33  
34  
35  
36  
37  
38  
39  
40  
41  
42  
43  
44  
45  
46  
47  
48  
49  
50  
51  
52  
53  
54  
55  
56  
57  
58  
59  
60

Not specified

Hospitals

Not specified

For peer review only

1  
2  
3  
4  
5  
6  
7  
8  
9  
10  
11  
12  
13  
14  
15  
16  
17  
18  
19  
20  
21  
22  
23  
24  
25  
26  
27  
28  
29  
30  
31  
32  
33  
34  
35  
36  
37  
38  
39  
40  
41  
42  
43  
44  
45  
46  
47  
48  
49  
50  
51  
52  
53  
54  
55  
56  
57  
58  
59  
60

Not specified

Hospitals, nursing homes, hospices

Most patients died at home.

For peer review only

1  
2  
3  
4  
5  
6  
7  
8  
9  
10  
11  
12  
13  
14  
15  
16  
17  
18  
19  
20  
21  
22  
23  
24  
25  
26  
27  
28  
29  
30  
31  
32  
33  
34  
35  
36  
37  
38  
39  
40  
41  
42  
43  
44  
45  
46  
47  
48  
49  
50  
51  
52  
53  
54  
55  
56  
57  
58  
59  
60

Home, Hospital, Nursing Homes

For peer review only

Not specified

Not specified

1  
2  
3  
4  
5  
6  
7  
8  
9  
10  
11  
12  
13  
14  
15  
16  
17  
18  
19  
20  
21  
22  
23  
24  
25  
26  
27  
28  
29  
30  
31  
32  
33  
34  
35  
36  
37  
38  
39  
40  
41  
42  
43  
44  
45  
46  
47  
48  
49  
50  
51  
52  
53  
54  
55  
56  
57  
58  
59  
60

Not specified

Hospital (51.7% of cases), Home (42.2%), Care home (4.3%)

For peer review only



1  
2  
3  
4  
5  
6  
7  
8  
9  
10  
11  
12  
13  
14  
15  
16  
17  
18  
19  
20  
21  
22  
23  
24  
25  
26  
27  
28  
29  
30  
31  
32  
33  
34  
35  
36  
37  
38  
39  
40  
41  
42  
43  
44  
45  
46  
47  
48  
49  
50  
51  
52  
53  
54  
55  
56  
57  
58  
59  
60

Home, hospital, or care home

Home

For peer review only

1  
2  
3  
4  
5  
6  
7  
8  
9  
10  
11  
12  
13  
14  
15  
16  
17  
18  
19  
20  
21  
22  
23  
24  
25  
26  
27  
28  
29  
30  
31  
32  
33  
34  
35  
36  
37  
38  
39  
40  
41  
42  
43  
44  
45  
46  
47  
48  
49  
50  
51  
52  
53  
54  
55  
56  
57  
58  
59  
60

Not specified

Home, Hospital

For peer review only

1  
2  
3  
4  
5  
6  
7  
8  
9  
10  
11  
12  
13  
14  
15  
16  
17  
18  
19  
20  
21  
22  
23  
24  
25  
26  
27  
28  
29  
30  
31  
32  
33  
34  
35  
36  
37  
38  
39  
40  
41  
42  
43  
44  
45  
46  
47  
48  
49  
50  
51  
52  
53  
54  
55  
56  
57  
58  
59  
60

Hospital

Home, Hospital, Nursing Homes

For peer review only

1  
2  
3  
4  
5  
6  
7  
8  
9  
10  
11  
12  
13  
14  
15  
16  
17  
18  
19  
20  
21  
22  
23  
24  
25  
26  
27  
28  
29  
30  
31  
32  
33  
34  
35  
36  
37  
38  
39  
40  
41  
42  
43  
44  
45  
46  
47  
48  
49  
50  
51  
52  
53  
54  
55  
56  
57  
58  
59  
60

Not specified

For peer review only

1  
2  
3  
4  
5  
6  
7  
8  
9  
10  
11  
12  
13  
14  
15  
16  
17  
18  
19  
20  
21  
22  
23  
24  
25  
26  
27  
28  
29  
30  
31  
32  
33  
34  
35  
36  
37  
38  
39  
40  
41  
42  
43  
44  
45  
46  
47  
48  
49  
50  
51  
52  
53  
54  
55  
56  
57  
58  
59  
60

Not specified

For peer review only

1  
2  
3  
4  
5  
6  
7  
8  
9  
10  
11  
12  
13  
14  
15  
16  
17  
18  
19  
20  
21  
22  
23  
24  
25  
26  
27  
28  
29  
30  
31  
32  
33  
34  
35  
36  
37  
38  
39  
40  
41  
42  
43  
44  
45  
46  
47  
48  
49  
50  
51  
52  
53  
54  
55  
56  
57  
58  
59  
60

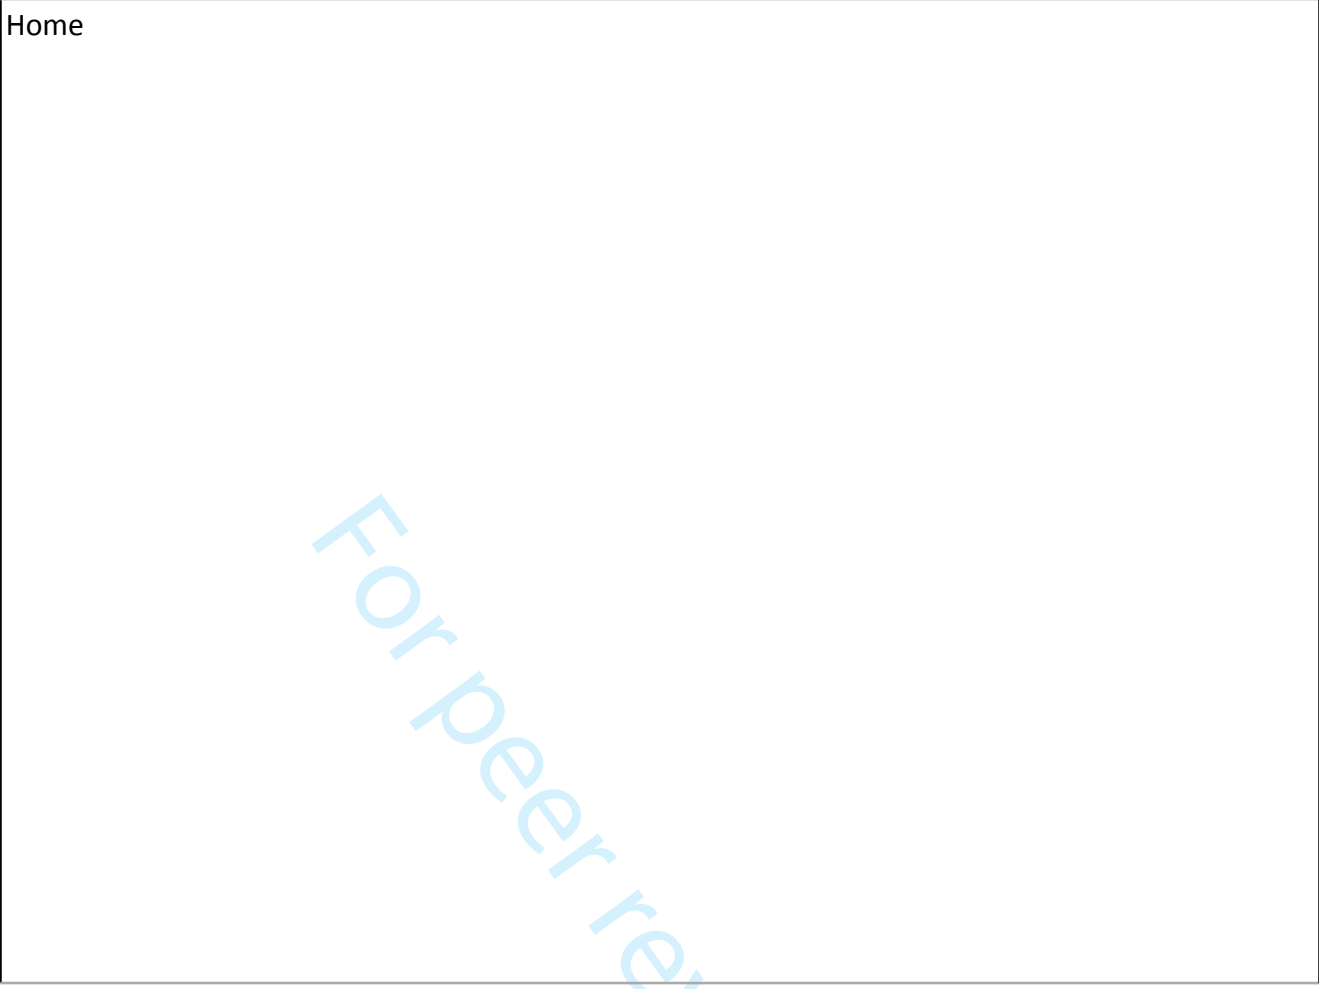

1  
2  
3  
4  
5  
6  
7  
8  
9  
10  
11  
12  
13  
14  
15  
16  
17  
18  
19  
20  
21  
22  
23  
24  
25  
26  
27  
28  
29  
30  
31  
32  
33  
34  
35  
36  
37  
38  
39  
40  
41  
42  
43  
44  
45  
46  
47  
48  
49  
50  
51  
52  
53  
54  
55  
56  
57  
58  
59  
60

Not specified

Not specified

Oregan - Home, Nursing home

Switzerland - Home, nursing home or in some cases premisis of NGO

For peer review only

1  
2  
3  
4  
5  
6  
7  
8  
9  
10  
11  
12  
13  
14  
15  
16  
17  
18  
19  
20  
21  
22  
23  
24  
25  
26  
27  
28  
29  
30  
31  
32  
33  
34  
35  
36  
37  
38  
39  
40  
41  
42  
43  
44  
45  
46  
47  
48  
49  
50  
51  
52  
53  
54  
55  
56  
57  
58  
59  
60

Not specified

For peer review only



1  
2  
3  
4  
5  
6  
7  
8  
9  
10  
11  
12  
13  
14  
15  
16  
17  
18  
19  
20  
21  
22  
23  
24  
25  
26  
27  
28  
29  
30  
31  
32  
33  
34  
35  
36  
37  
38  
39  
40  
41  
42  
43  
44  
45  
46  
47  
48  
49  
50  
51  
52  
53  
54  
55  
56  
57  
58  
59  
60

Not specified

For peer review only

At home in 41% of cases.

1  
2  
3  
4  
5  
6  
7  
8  
9  
10  
11  
12  
13  
14  
15  
16  
17  
18  
19  
20  
21  
22  
23  
24  
25  
26  
27  
28  
29  
30  
31  
32  
33  
34  
35  
36  
37  
38  
39  
40  
41  
42  
43  
44  
45  
46  
47  
48  
49  
50  
51  
52  
53  
54  
55  
56  
57  
58  
59  
60

In hospital only

For peer review only

1  
2  
3  
4  
5  
6  
7  
8  
9  
10  
11  
12  
13  
14  
15  
16  
17  
18  
19  
20  
21  
22  
23  
24  
25  
26  
27  
28  
29  
30  
31  
32  
33  
34  
35  
36  
37  
38  
39  
40  
41  
42  
43  
44  
45  
46  
47  
48  
49  
50  
51  
52  
53  
54  
55  
56  
57  
58  
59  
60

Not specified

Private room, suction equipment available in room.

Not specified

For peer review only

1  
2  
3  
4  
5  
6  
7  
8  
9  
10  
11  
12  
13  
14  
15  
16  
17  
18  
19  
20  
21  
22  
23  
24  
25  
26  
27  
28  
29  
30  
31  
32  
33  
34  
35  
36  
37  
38  
39  
40  
41  
42  
43  
44  
45  
46  
47  
48  
49  
50  
51  
52  
53  
54  
55  
56  
57  
58  
59  
60

Not specified

Not specified

Not specified

For peer review only

1  
2  
3  
4  
5  
6  
7  
8  
9  
10  
11  
12  
13  
14  
15  
16  
17  
18  
19  
20  
21  
22  
23  
24  
25  
26  
27  
28  
29  
30  
31  
32  
33  
34  
35  
36  
37  
38  
39  
40  
41  
42  
43  
44  
45  
46  
47  
48  
49  
50  
51  
52  
53  
54  
55  
56  
57  
58  
59  
60

Not specified

Not specified

Not specified

For peer review only

1  
2  
3  
4  
5  
6  
7  
8  
9  
10  
11  
12  
13  
14  
15  
16  
17  
18  
19  
20  
21  
22  
23  
24  
25  
26  
27  
28  
29  
30  
31  
32  
33  
34  
35  
36  
37  
38  
39  
40  
41  
42  
43  
44  
45  
46  
47  
48  
49  
50  
51  
52  
53  
54  
55  
56  
57  
58  
59  
60

|                                                                                            |
|--------------------------------------------------------------------------------------------|
| <p>Not specified</p>                                                                       |
| <p>Location is to be determined through discussion with patient and family/caregivers.</p> |
| <p>Not specified</p>                                                                       |

For peer review only

1  
2  
3  
4  
5  
6  
7  
8  
9  
10  
11  
12  
13  
14  
15  
16  
17  
18  
19  
20  
21  
22  
23  
24  
25  
26  
27  
28  
29  
30  
31  
32  
33  
34  
35  
36  
37  
38  
39  
40  
41  
42  
43  
44  
45  
46  
47  
48  
49  
50  
51  
52  
53  
54  
55  
56  
57  
58  
59  
60

Not specified

Not specified

For peer review only

1  
2 Not specified  
3  
4  
5  
6  
7  
8  
9  
10  
11  
12  
13  
14  
15  
16  
17  
18  
19  
20  
21  
22  
23  
24  
25

26 Not specified  
27  
28  
29  
30  
31  
32  
33  
34  
35  
36  
37  
38  
39  
40  
41  
42  
43

44 The vast majority of deaths occur at the patient's home, more rarely in a medico-social institution  
45 (EMS), except in hospitals  
46  
47  
48  
49  
50  
51  
52  
53  
54  
55  
56  
57  
58  
59  
60



1  
2  
3  
4  
5  
6  
7  
8  
9  
10  
11  
12  
13  
14  
15  
16  
17  
18  
19  
20  
21  
22  
23  
24  
25  
26  
27  
28  
29  
30  
31  
32  
33  
34  
35  
36  
37  
38  
39  
40  
41  
42  
43  
44  
45  
46  
47  
48  
49  
50  
51  
52  
53  
54  
55  
56  
57  
58  
59  
60

Hospice

Not specified

For peer review only

1  
2  
3  
4  
5  
6  
7  
8  
9  
10  
11  
12  
13  
14  
15  
16  
17  
18  
19  
20  
21  
22  
23  
24  
25  
26  
27  
28  
29  
30  
31  
32  
33  
34  
35  
36  
37  
38  
39  
40  
41  
42  
43  
44  
45  
46  
47  
48  
49  
50  
51  
52  
53  
54  
55  
56  
57  
58  
59  
60

Not specified

Home, hospital

Not specified

For peer review only

1  
2  
3  
4  
5  
6  
7  
8  
9  
10  
11  
12  
13  
14  
15  
16  
17  
18  
19  
20  
21  
22  
23  
24  
25  
26  
27  
28  
29  
30  
31  
32  
33  
34  
35  
36  
37  
38  
39  
40  
41  
42  
43  
44  
45  
46  
47  
48  
49  
50  
51  
52  
53  
54  
55  
56  
57  
58  
59  
60

Home

Not specified

For peer review only

1  
2  
3  
4  
5  
6  
7  
8  
9  
10  
11  
12  
13  
14  
15  
16  
17  
18  
19  
20  
21  
22  
23  
24  
25  
26  
27  
28  
29  
30  
31  
32  
33  
34  
35  
36  
37  
38  
39  
40  
41  
42  
43  
44  
45  
46  
47  
48  
49  
50  
51  
52  
53  
54  
55  
56  
57  
58  
59  
60

Home

Hospitals, Nursing Homes

For peer review only

1  
2  
3  
4  
5  
6  
7  
8  
9  
10  
11  
12  
13  
14  
15  
16  
17  
18  
19  
20  
21  
22  
23  
24  
25  
26  
27  
28  
29  
30  
31  
32  
33  
34  
35  
36  
37  
38  
39  
40  
41  
42  
43  
44  
45  
46  
47  
48  
49  
50  
51  
52  
53  
54  
55  
56  
57  
58  
59  
60

Not specified

Nursing home

Not specified

For peer review only

1  
2 At the headquarters of Dignitas, a right-to-die organisation  
3  
4  
5  
6  
7  
8  
9  
10  
11  
12  
13  
14  
15  
16  
17  
18  
19  
20  
21  
22  
23  
24

25  
26 Mostly undertaken in general practice rather than hospitals or nursing homes.  
27  
28  
29  
30  
31  
32  
33  
34  
35  
36  
37  
38  
39  
40

41 Not specified  
42  
43  
44  
45  
46  
47  
48  
49  
50  
51  
52  
53  
54  
55  
56  
57  
58  
59  
60

1  
2  
3  
4  
5  
6  
7  
8  
9  
10  
11  
12  
13  
14  
15  
16  
17  
18  
19  
20  
21  
22  
23  
24  
25  
26  
27  
28  
29  
30  
31  
32  
33  
34  
35  
36  
37  
38  
39  
40  
41  
42  
43  
44  
45  
46  
47  
48  
49  
50  
51  
52  
53  
54  
55  
56  
57  
58  
59  
60

Not specified

Home

For peer review only

1  
2 For 2015: home 86%; ILTC 10%; other 1% unknown 3%.  
3  
4  
5  
6  
7  
8  
9  
10  
11  
12  
13  
14  
15  
16  
17  
18  
19  
20  
21  
22  
23  
24  
25  
26  
27  
28  
29  
30  
31  
32  
33  
34

35  
36 Not specified, but space to document in procedure record.  
37  
38  
39  
40  
41  
42  
43  
44  
45  
46  
47  
48  
49  
50  
51  
52  
53  
54  
55  
56  
57  
58  
59  
60



1  
2  
3  
4  
5  
6  
7  
8  
9  
10  
11  
12  
13  
14  
15  
16  
17  
18  
19  
20  
21  
22  
23  
24  
25  
26  
27  
28  
29  
30  
31  
32  
33  
34  
35  
36  
37  
38  
39  
40  
41  
42  
43  
44  
45  
46  
47  
48  
49  
50  
51  
52  
53  
54  
55  
56  
57  
58  
59  
60

Hospital

For peer review only

1  
2  
3  
4  
5  
6  
7  
8  
9  
10  
11  
12  
13  
14  
15  
16  
17  
18  
19  
20  
21  
22  
23  
24  
25  
26  
27  
28  
29  
30  
31  
32  
33  
34  
35  
36  
37  
38  
39  
40  
41  
42  
43  
44  
45  
46  
47  
48  
49  
50  
51  
52  
53  
54  
55  
56  
57  
58  
59  
60

Not specified

For peer review only

1  
2  
3  
4  
5  
6  
7  
8  
9  
10  
11  
12  
13  
14  
15  
16  
17  
18  
19  
20  
21  
22  
23  
24  
25  
26  
27  
28  
29  
30  
31  
32  
33  
34  
35  
36  
37  
38  
39  
40  
41  
42  
43  
44  
45  
46  
47  
48  
49  
50  
51  
52  
53  
54  
55  
56  
57  
58  
59  
60

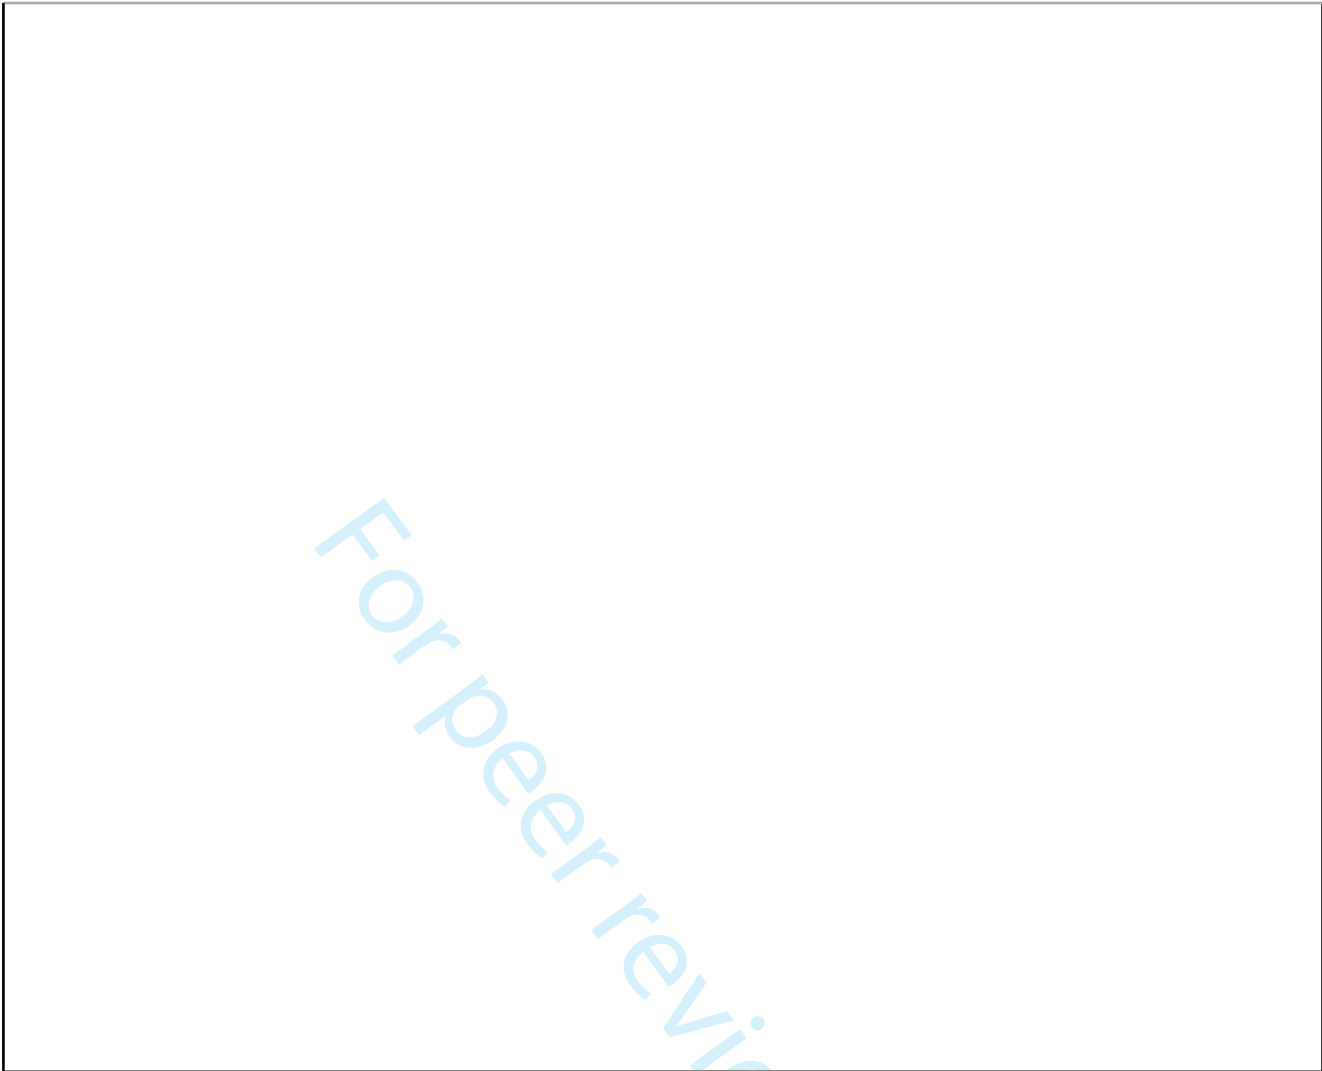

For peer review only

**MAID Provision: Participants*****Role of Healthcare Providers***

In state(s) where assisted suicide is legal, the nurse may choose to continue to provide care or may withdraw from the situation after transferring responsibility for care to a nursing colleague.

Not specified

Pharmacist - discuss case and use of medication with healthcare team, pharmaceutical analysis of medical prescription, dispense medication, provide information on reconstitution and administration of medication, secure detention and restitution of unused drugs

1  
2  
3  
4  
5  
6  
7  
8  
9  
10  
11  
12  
13  
14  
15  
16  
17  
18  
19  
20  
21  
22  
23  
24  
25  
26  
27  
28  
29  
30  
31  
32  
33  
34  
35  
36  
37  
38  
39  
40  
41  
42  
43  
44  
45  
46  
47  
48  
49  
50  
51  
52  
53  
54  
55  
56  
57  
58  
59  
60

Physician - prescribing and administering medication  
Pharmacist - dispensing medication

Physicians - administering drugs.

For peer review only

1  
2  
3  
4  
5  
6  
7  
8  
9  
10  
11  
12  
13  
14  
15  
16  
17  
18  
19  
20  
21  
22  
23  
24  
25  
26  
27  
28  
29  
30  
31  
32  
33  
34  
35  
36  
37  
38  
39  
40  
41  
42  
43  
44  
45  
46  
47  
48  
49  
50  
51  
52  
53  
54  
55  
56  
57  
58  
59  
60

Not specified

Not specified

Physician - administering drugs.

For peer review only

1  
2  
3  
4  
5  
6  
7  
8  
9  
10  
11  
12  
13  
14  
15  
16  
17  
18  
19  
20  
21  
22  
23  
24  
25  
26  
27  
28  
29  
30  
31  
32  
33  
34  
35  
36  
37  
38  
39  
40  
41  
42  
43  
44  
45  
46  
47  
48  
49  
50  
51  
52  
53  
54  
55  
56  
57  
58  
59  
60

Nurses: They are involved in preparing medical aspects of the euthanasia (infusion, medication) as well as in contextual aspects (positioning the people in the room, advising the physician to take a seat, making sure that the requested rituals (music, candles) are taken care of). provide the standard mourning care for the family.  
May not administer medication  
Physicians: Administering medication

Physician - prescribe and administer drugs.  
Nurse - assist with provision

For peer review only

1  
2  
3  
4  
5  
6  
7  
8  
9  
10  
11  
12  
13  
14  
15  
16  
17  
18  
19  
20  
21  
22  
23  
24  
25  
26  
27  
28  
29  
30  
31  
32  
33  
34  
35  
36  
37  
38  
39  
40  
41  
42  
43  
44  
45  
46  
47  
48  
49  
50  
51  
52  
53  
54  
55  
56  
57  
58  
59  
60

Not specified

Pharmacist - dispensing medication

For peer review only



1  
2  
3  
4  
5  
6  
7  
8  
9  
10  
11  
12  
13  
14  
15  
16  
17  
18  
19  
20  
21  
22  
23  
24  
25  
26  
27  
28  
29  
30  
31  
32  
33  
34  
35  
36  
37  
38  
39  
40  
41  
42  
43  
44  
45  
46  
47  
48  
49  
50  
51  
52  
53  
54  
55  
56  
57  
58  
59  
60

Physician - prescribing and administering medication

Physician - prescribe medication, present for ingestion of medications

Pharmacist - schedules a private room to meet with the patient (and family) in order to discuss preparation of the drug for ingestion, potential side effects, and the use of antiemetic therapy

For peer review only

1  
2  
3  
4  
5  
6  
7  
8  
9  
10  
11  
12  
13  
14  
15  
16  
17  
18  
19  
20  
21  
22  
23  
24  
25  
26  
27  
28  
29  
30  
31  
32  
33  
34  
35  
36  
37  
38  
39  
40  
41  
42  
43  
44  
45  
46  
47  
48  
49  
50  
51  
52  
53  
54  
55  
56  
57  
58  
59  
60

Physician - prescribing and administering medication  
Pharmacist - dispensing medication

Of the 38 physicians who reported their most recent experience with a lethal injection, 43 percent administered it themselves, and 57 percent asked someone else to do so (a nurse in 57 percent of cases and another physician in 32 percent) or ordered an increase in the dose of an intravenous sedative or analgesic already being administered (in 11 percent of cases).

Aid-in-dying is to be administered under the supervision of a qualified medical practitioner.

Physician - prescribe medication

1  
2  
3  
4  
5  
6  
7  
8  
9  
10  
11  
12  
13  
14  
15  
16  
17  
18  
19  
20  
21  
22  
23  
24  
25  
26  
27  
28  
29  
30  
31  
32  
33  
34  
35  
36  
37  
38  
39  
40  
41  
42  
43  
44  
45  
46  
47  
48  
49  
50  
51  
52  
53  
54  
55  
56  
57  
58  
59  
60

Physician - prescribing and administering drugs

Physician - prescribing medication

For peer review only

1  
2 Recent court decisions indicate that euthanasia and assisted suicide  
3 may be performed by physicians only. A nurse is never allowed to do  
4 so, even when acting under the direct supervision of a physician.  
5 However, specialists have indicated that nurses administered lethal  
6 drugs under their supervision in 21% of cases. In 16% of cases nurses  
7 administered the drugs without the specialist being present, and 5%  
8 of cases the nurse and the specialist did it together.  
9  
10

11 In 11 of the 22 cases, the physician administered the drugs  
12 alone; in 4 cases, a colleague or/and a nurse assisted; in 4  
13 cases (all reported by the same physician), the act was  
14 performed by the palliative team (most likely the nurse),  
15 without the physician's attendance; in 2 cases, a colleague  
16 administered the drugs; in 1 case, a nurse administered the  
17 drugs by herself.  
18  
19  
20  
21  
22

23 Physician - prescribing medication  
24  
25  
26  
27  
28  
29  
30  
31  
32  
33  
34  
35  
36  
37  
38  
39  
40  
41  
42  
43  
44  
45  
46  
47  
48  
49  
50  
51  
52  
53  
54  
55  
56  
57  
58  
59  
60

1  
2 Physicians directly provide assisted suicide. Nobody should be  
3 obliged to comply with a request to terminate life or to assist  
4 with suicide. In the Commission's judgement, a doctor with  
5 conscientious objections should, however, ensure that the  
6 patient's treatment is continued and that the patient is given  
7 access to information about other agencies or colleagues  
8 prepared to render assistance. The State Commission takes the  
9 view that the preparation and dispensing of drugs designed to  
10 terminate life should be entrusted to those authorized to  
11 pharmacists, dispensing physicians and pharmacists' assistants.  
12 The Commission does not consider that it is the responsibility  
13 of pharmacists to determine in each specific instance whether  
14 the conditions for the termination of life or assisting suicide  
15 without legal sanctions have been complied with. The  
16 Commission takes the view that pharmacists are not obliged to  
17 supply drugs to terminate life. Both pharmacists and their  
18 assistants can refuse to co-operate if they have objections of a  
19 conscientious or other nature against the preparation and  
20 dispensing of such drugs.  
21  
22  
23  
24  
25  
26

27  
28 129 nurses reported that they had participated in active euthanasia  
29 or assisted suicide at least once in their careers.  
30  
31

32 Not specified  
33  
34  
35  
36  
37  
38  
39  
40  
41  
42  
43  
44  
45  
46  
47  
48  
49  
50  
51  
52  
53  
54  
55  
56  
57  
58  
59  
60

1  
2 GPs reported having consulted others in advance in three-  
3 quarters of the at-home end-of-life decision cases. They  
4 consulted a health care worker (with or without a family  
5 member) in 43% of cases, and in 31% they consulted a family  
6 member but no health care worker. Physicians in institutions  
7 reported consultations in 85% of all ELDs: usually a health care  
8 worker (78%) was involved and rarely only a family member  
9 (6%). The consulted health care worker was more likely to be a  
10 nurse in institutional cases than in at-home cases (52% vs.  
11 21%). The consultation of a nurse by the treating physician in  
12 an institution was the highest among euthanasia cases (83%). At  
13 home, 20% of nurse consultations were for euthanasia cases. In  
14 euthanasia cases, physicians consulted nurses four times more  
15 frequently in an institution than at home. Nurses aided  
16 physicians in administering lethal drugs in 17% of the euthanasia  
17 deaths at home. For euthanasia in an institution, nurses  
18 administered lethal drugs themselves in more than half of the  
19 cases studied: in 14% the physician was at the bedside while  
20 the nurse administered the drugs, and in 45% the nurse gave  
21 the drugs within the context of a palliative care team, but  
22 without the attendance of a physician.  
23  
24  
25  
26  
27  
28  
29

30 In the Netherlands, non-penalisation applies to both assisted  
31 suicide and termination of life on request, but exclusively for  
32 physicians. The Oregon Death with Dignity Act is also related to  
33 physicians, although the presence of a physician at the suicide  
34 is not required. In contrast, in Switzerland, Article 115 of the  
35 Penal Code applies equally to everyone. The role of the  
36 physician in assisted suicide as carried out by right-to-die  
37 organisations is, at present, almost solely related to the  
38 prescription of the barbiturates .  
39  
40  
41

42 Not specified  
43  
44  
45  
46  
47  
48  
49  
50

51 Physicians often prescribed lethal medications to patients who took  
52 these medications on their own surrounded by their families.  
53  
54  
55  
56  
57  
58  
59  
60

1  
2 The role played by the nurse in carrying out euthanasia  
3 can vary from simple presence in person to the actual adminis-  
4 tration of the lethal medication. In general, the nurse has a  
5 role that consists primarily in assisting the patient and family.  
6 Dutch homecare nurses are absent at the moment the lethal  
7 medication is administered in 90% of cases. In 3% of cases, the  
8 nurse is present in the house but not at the patient's bedside.  
9 This means that in 7% of cases, homecare nurses are present  
10 at the patient's bedside during administration of the lethal  
11 medication. In a nursing home, this percentage is 60%. Although  
12 the administration of the lethal medication is usually carried out  
13 by a physician, it is sometimes delegated to a nurse. For  
14 instance, 21% of Dutch specialists stated that nurses sometimes  
15 administer the lethal medication under their supervision. In the  
16 same study, Dutch GPs stated that the lethal medication was  
17 administered by a nurse in 4% of the cases, and in 3% of cases  
18 for Dutch hospital physicians. An Australian study showed that  
19 23% of nurses had at some point been asked by the physician  
20 to administer the lethal medication, and of these, 85% had  
21 complied with the request.  
22  
23  
24  
25  
26  
27  
28

29 Not specified  
30  
31  
32  
33  
34  
35  
36  
37  
38  
39  
40  
41  
42  
43  
44  
45  
46  
47  
48  
49  
50  
51  
52  
53  
54  
55  
56  
57  
58  
59  
60

1  
2  
3  
4  
5  
6  
7  
8  
9  
10  
11  
12  
13  
14  
15  
16  
17  
18  
19  
20  
21  
22  
23  
24  
25  
26  
27  
28  
29  
30  
31  
32  
33  
34  
35  
36  
37  
38  
39  
40  
41  
42  
43  
44  
45  
46  
47  
48  
49  
50  
51  
52  
53  
54  
55  
56  
57  
58  
59  
60

Not specified

In many states, nurse practitioners can independently prescribe the drugs that can be used to kill (e.g. Oregon). Under Oregon's and other proposed laws, NP and physician participation is required in some measure. Practitioners unwilling to assist suicide would be required to transfer medical records to practitioners who would. This transfer is required despite the nurse's religious or moral objections to incuplation in the self-killing.

Prescribing physician present when medication ingested 47% of the time

Prescribing physicians were present while nine of the patients ingested the medication.



1  
2 Of the nurses whose patient received euthanasia, 64% (75/117)  
3 reported having been involved in the decision-making process. In  
4 the cases of euthanasia, 40% of the nurses were involved in  
5 some way in the preparation of the life-ending drugs (Table3).  
6 During the administration of the drugs, 34% of the nurses  
7 reported that they were present and 31% that they gave  
8 support to the patient, the relatives, the physician or colleague  
9 nurses. The drugs were administered by the nurse in 14 (12%)  
10 of the cases of euthanasia. The physician was not a co-  
11 administrator in 12 of the 14 cases, but the drug was always  
12 given on his or her orders. In nine cases of euthanasia (64%),  
13 the physician was not present during the administration of the  
14 drug.

15  
16  
17  
18 Physician - administering drugs

19 Nurses and Paramedics - both present during administration of  
20 lethal drugs  
21  
22  
23  
24  
25  
26

27 More physicians than nurses assisted their patients' suicides.  
28 However, although nurses received fewer requests to perform  
29 euthanasia than physicians, they performed patient-requested  
30 euthanasia 4 times more frequently than physicians. Nurses  
31 frequently consulted with others - particularly physicians - about  
32 patient requests for assistance with death but rarely with one  
33 another including nursing supervisors.  
34  
35

36 Physicians were approving and "honoring" requests for physician-  
37 assisted dying.  
38  
39

40 Before delivering euthanasia drugs, timely deliberation between  
41 physician and pharmacist is necessary. This needs to include  
42 relevant background information concerning the patient like  
43 present medication, swallow-difficulties and such. The  
44 pharmacist can refuse delivery. The request for delivery has to  
45 be in writing like a prescription for an opioid, as regulated in  
46 the Opium Law. The written request needs to be archived like  
47 a prescription for an opioid. The pharmacist should deliver the  
48 euthanasia drug to the physician in person. Pharmacy assistants  
49 should not to be involved in the delivery. The label has to  
50 contain the message that remainders need to be personally  
51 returned to the pharmacist  
52  
53  
54  
55  
56  
57  
58  
59  
60

1  
2 Physicians are not required to participate in assisted suicide,  
3 nor should they initiate the discussion of it, according to the  
4 Oregon Guide-book. Nonetheless, the individual health care  
5 provider who does not wish to discuss or assist a patient must  
6 furnish an alternative provider who will meet the patient's  
7 needs. If a doctor or hospice nurse must, for reasons of  
8 conscience, refuse to assist in a suicide, they must also arrange  
9 for a transfer of care to a doctor who can meet the patient's  
10 stated needs for care, rather than leaving the patient with the  
11 choice of being abandoned or abandoning the request for a  
12 lethal prescription. Pharmacists, too, have a right to refuse to  
13 participate in assisted suicides. As with other health care  
14 workers, pharmacists who cannot, in conscience, assist in a  
15 suicide should attempt to refer the patient to a pharmacist  
16 willing to fill a life-ending prescription. Any pharmacist who fills  
17 a lethal prescription has an obligation to consult with the  
18 prescribing physician about the patient's total pharmacological  
19 history and the implications of this history for the current  
20 prescription. Additionally, the pharmacist should provide  
21 medication counseling, in a private setting, for the patient or  
22 family member who picks up the prescription, assuming the  
23 family member involved knows the purpose of the medication.  
24 The doctor who is present when a patient takes a lethal  
25 medication also takes on the responsibility of providing life-  
26 saving measures if the patient then has a change of mind.  
27  
28  
29  
30  
31  
32  
33  
34

35  
36 In the Netherlands physicians perform euthanasia and assisted  
37 suicide approximately 3600 times a year. General practitioners (GPs)  
38 perform little over three quarters of these cases. Twenty-four  
39 pharmacists (89%) had ordered one or more standardised  
40 packages from the FTN. They had ordered a total of 46  
41 packages in 1993 and 57 packages in 1994. In total, the  
42 pharmacists supplied euthanatics to a GP 74 times in 1993 and 95  
43 times in 1994. These were almost always 'intravenous' packages.  
44 Pharmacists stated that in 58% of cases the GP asked for  
45 advice on the choice of the euthanatics. Furthermore, the  
46 pharmacists and the GPs discussed the choice between the  
47 'oral' and the 'intravenous' method, the preparation for use of  
48 the euthanatics and the method of administration. The protocol  
49 is eventually intended for GPs. The pharmacists are  
50 intermediaries in contacting GPs who perform euthanasia or  
51 assist with suicide.  
52  
53  
54  
55  
56

57 Forty-eight of the GPs and 12% of the NHPs indicated that  
58 they had at some time administered euthanasia or physician-  
59 assisted suicide.  
60

1  
2 Physician-assisted suicide was carried out by both GPs and NHPs  
3 (Nursing home physicians)  
4

5  
6 Consultant/physician providing euthanasia and physician-assisted  
7 suicide was a GP in 67% of the cases, a specialist in 31% of the cases  
8 and a nursing home physician in 3% of the patients. If the consultant  
9 was a specialist, it was internal medicine in 74% of the cases.  
10

11 Not specified  
12  
13  
14

15 If the health care provider determines that it will initiate care  
16 for a prospective patient who intends to commit physician-  
17 assisted suicide or states that such a decision may be made  
18 later, the provider must determine if all employees will be  
19 expected to provide care to an assigned patient prior to a  
20 suicide event regardless of the employee's personal view of  
21 physician-assisted suicide.  
22  
23  
24

25 Not specified  
26  
27  
28  
29  
30  
31  
32  
33  
34  
35  
36  
37  
38

39 Not specified  
40  
41  
42  
43  
44  
45  
46  
47  
48  
49  
50  
51  
52  
53  
54  
55  
56  
57  
58  
59  
60

1  
2 In about half (49.8%) of 267 cases nurses were not involved in  
3 the general practitioner's decision-making process, and in only  
4 13.3% of 264 cases, did they attend the administration of the  
5 lethal drugs. District nurses had provided some degree of  
6 aftercare to the surviving relatives in 80.3% of 264 cases.  
7 Aftercare was given (n=212) a couple of days or weeks after the  
8 death of the patient and took several forms, most commonly  
9 attendance at the funeral (23.1%), and one or more home visits  
10 for a personal talk (90.1%). In a number of cases, the general  
11 practitioner and/or another care provider had an aftercare talk  
12 with the surviving relatives. In six cases (25%), district nurses  
13 had been involved in administering the lethal drugs. Their role  
14 was passing the lethal drugs to the general practitioner; checking  
15 the physician's actions; connecting the infusion system to the  
16 infusion bag containing lethal drugs; starting the infusion by  
17 injecting lethal drugs; showing the physician how to handle the  
18 infusion pump or infusion tap; or injecting lethal drugs via a  
19 gastrostomy drip-feed. In 21 of 24 cases (87.5%), general  
20 practitioners administered the lethal drugs. In one case (4.2%),  
21 the patient took the lethal drugs as prescribed by the general  
22 practitioner. In two of these (8.3%), district nurses administered  
23 the lethal drugs together with the general practitioner at the

31 The carrying out of euthanasia is reserved for physicians;  
32 delegation to nurses is forbidden. If a nurse has conscientious  
33 objections and is confronted with a request for euthanasia, he  
34 or she may be expected to inform the patient of this point of  
35 view. Physicians ordered the lethal drugs from the pharmacy.  
36 Some drugs were obtained already made up; in other cases they  
37 had to be dissolved while on the way. In this situation, nurses  
38 could be given the task of dissolving the drugs. Usually, the  
39 lethal drugs were administered by the physician. However, it  
40 was noted that sometimes the nurses (2/12 in this study)  
41 administered them in the presence of the physician. While the  
42 euthanasia procedure was being carried out, both the physician  
43 and the nurse could be present, from the moment of  
44 administering the lethal drugs until the death of the patient.  
45  
46  
47  
48  
49  
50

1  
2 If health care institutions allow physician assisted death, they  
3 have to see to it that the attending physician performs  
4 euthanasia according to the rules as they have been laid out  
5 by the courts. On top of that it is good clinical practice that  
6 health care institutions have a policy of their own stating their  
7 viewpoint regard- ing this issue, defining the responsibilities of  
8 those involved and incorporating the legal requirements. All  
9 health care professionals involved in the terminal care of this  
10 particular patient are expected to take good notice of the  
11 existing hospital protocol and will communicate with each other  
12 about all aspects that need attention. This includes the  
13 attending physician(s), nurses, the hospital chaplain and, of  
14 course, the patient himherself and, if so indicated by the  
15 patient, also family/friends.

16  
17  
18  
19  
20  
21 The types of physicians that performed assisted suicide and  
22 euthanasia included general practitioners, clinical specialits and  
23 nursing home physicians.  
24

25  
26 Not specified  
27  
28  
29  
30  
31  
32  
33  
34  
35  
36  
37  
38  
39  
40  
41  
42  
43  
44  
45  
46  
47  
48  
49  
50  
51  
52  
53  
54  
55  
56  
57  
58  
59  
60

1  
2 Vermont: Only a doctor of medicine or osteopathy licensed to  
3 practice medicine in Washington may write this prescription. A  
4 physician, nurse, pharmacist, or other person shall not be under  
5 any duty, by law or contract, to participate in the provision of  
6 a lethal dose of medication to a patient. Washington: Only a  
7 doctor of medicine or osteopathy licensed to practice medicine  
8 in Washington may write this prescription. Participation is  
9 entirely voluntary. Health care providers are not required to  
10 provide prescriptions or medications to qualified patients. In  
11 most cases, a pharmacist plays a significant role, not only as a  
12 member of the interdisciplinary team but also as a dispenser of  
13 the lethal dose of medication used for this practice. According  
14 to the State of Washington annual evaluation report, about 57  
15 pharmacists were involved in dispensing medications that were  
16 used for the purpose of physician-assisted suicide.  
17  
18  
19  
20  
21  
22

23 The physician should remain in the vicinity of patient and family  
24 in case unexpected or terrifying effects occur, and should  
25 be prepared to end life by an injection if suicide fails.  
26  
27  
28  
29  
30  
31  
32  
33  
34  
35  
36  
37  
38  
39  
40  
41  
42  
43  
44  
45  
46  
47  
48  
49  
50  
51  
52  
53  
54  
55  
56  
57  
58  
59  
60

1  
2 Physician - Prescribes, collects, and administers medication  
3 Pharmacist - dispensing medication  
4 Nurse - inserting IV cannula (Not allowed to administer medication)  
5  
6  
7  
8  
9  
10  
11  
12  
13  
14  
15  
16  
17  
18  
19  
20  
21  
22  
23  
24  
25  
26  
27  
28  
29  
30  
31  
32  
33  
34

35  
36 Seven percent of the responding pharmacists reported that they had  
37 been confronted with a prescription for drugs that in their  
38 judgement were exclusively intended to shorten the patient's life  
39 during the last two years preceding this study. Half of them received  
40 one prescription, 40% received two or three prescriptions and 10%  
41 received four or six prescriptions. Almost all the pharmacists who  
42 received such a prescription dispensed the drug, with half doing so  
43 after contacting the physician.  
44  
45

46 Not specified  
47  
48  
49  
50  
51  
52  
53  
54  
55  
56  
57  
58  
59  
60

1  
2 Physician - prescribing and administering medication  
3 Pharmacist - pharmaceutical analysis of the medical prescription,  
4 delivery to nominative dispensation; provision of information on  
5 reconstitution and administration of the injectable used, Securing  
6 detention, including restitution unused drugs.  
7  
8  
9  
10  
11  
12  
13  
14  
15  
16  
17  
18  
19  
20  
21  
22  
23  
24  
25  
26  
27  
28  
29  
30  
31  
32  
33  
34

35 Physicians - prescribe medication, prepare medication for  
36 administration  
37 Pharmacist - dispensing and storing medication  
38  
39  
40  
41  
42  
43  
44  
45  
46  
47  
48  
49  
50  
51  
52  
53  
54  
55  
56  
57  
58  
59  
60



1  
2 Physician - Prescribing medication  
3  
4  
5  
6  
7  
8  
9  
10  
11  
12  
13  
14  
15  
16  
17  
18  
19  
20  
21  
22  
23  
24  
25  
26  
27  
28  
29  
30

31 There is no legal requirement that any person, including any  
32 health care provider, be in attendance when the patient takes  
33 the medication. State reporting indicates that during 2001-2010,  
34 a prescribing physician was in attendance in just over 20% of  
35 cases; another provider besides the prescribing physician was in  
36 attendance in 50% of the cases, and in approximately 3 (29.2%)  
37 of 10 cases, either no provider has been present or there is no  
38 knowledge as to who was present at ingestion.  
39  
40  
41  
42  
43  
44  
45  
46  
47  
48  
49  
50  
51  
52  
53  
54  
55  
56  
57  
58  
59  
60

1  
2 Physician - prescribing and administering medication  
3 - Nurse - assisting physician, sometimes administering medication  
4  
5  
6  
7  
8  
9  
10  
11  
12  
13  
14  
15  
16  
17  
18  
19  
20  
21  
22  
23  
24  
25  
26  
27  
28  
29  
30  
31  
32  
33  
34

35  
36 Not specified  
37  
38  
39  
40  
41  
42  
43  
44  
45  
46  
47  
48  
49  
50  
51  
52  
53  
54  
55  
56  
57  
58  
59  
60

1  
2  
3  
4  
5  
6  
7  
8  
9  
10  
11  
12  
13  
14  
15  
16  
17  
18  
19  
20  
21  
22  
23  
24  
25  
26  
27  
28  
29  
30  
31  
32  
33  
34  
35  
36  
37  
38  
39  
40  
41  
42  
43  
44  
45  
46  
47  
48  
49  
50  
51  
52  
53  
54  
55  
56  
57  
58  
59  
60

Not specified

The attending physician should discuss with the patient whether the physician or other health care professional(s) will be present for the patient's self-administration of the lethal dose of medication. The attending physician or other health care professional(s), especially hospice, may be able to provide comfort care to the patient and family, avoid notification of emergency medical services, and notify the funeral home and/or other proper authorities. If the attending physician is registered as a dispensing physician with the Oregon Medical Board, he/she may dispense medication directly, including ancillary medications to minimize the patient's discomfort. If the attending physician is not a dispensing physician, then with the patient's written consent, the attending physician must deliver the written prescription either personally or by mail to the pharmacist, who will then dispense the medication to either the patient, the attending physician, or an expressly identified agent of the patient. The pharmacist has the opportunity to decide whether or not to participate. Should he/she choose not to participate, the refusing pharmacist may, but is

not obligated to, suggest a pharmacist who is willing to fill the prescription under the Oregon Act. The participating pharmacist should be prepared to discuss important pharmaceutical information and patient instructions with the physician. The attending physician assumes responsibility for advising on appropriate drug use when providing the medication directly to

Overall, 10.8% of responding oncologists had performed physician-assisted suicide in their career and 3.4% had done so in the preceding 12 months.

1  
2 The data regarding performance of euthanasia or PAS by nurses  
3 vary widely, with one study showing that about 16% have  
4 participated in euthanasia or PAS, and others showing that  
5 fewer than 5% have done so.  
6  
7  
8  
9  
10  
11  
12  
13  
14  
15  
16  
17  
18  
19  
20  
21

22 Physician - prescribing and administering medication  
23  
24  
25  
26  
27  
28  
29  
30  
31  
32

33 Not specified  
34  
35  
36  
37  
38  
39  
40  
41  
42

43 Physician, usually the patient's family doctor, administers  
44 medications.  
45  
46  
47  
48

49 The majority of Exit Deutsche Schweiz members were  
50 prescribed a lethal dose of medicine by their own doctors,  
51 whereas most Dignitas members obtained their lethal medication  
52 through a doctor working with Dignitas.  
53  
54  
55  
56  
57  
58  
59  
60

1  
2  
3  
4  
5  
6  
7  
8  
9  
10  
11  
12  
13  
14  
15  
16  
17  
18  
19  
20  
21  
22  
23  
24  
25  
26  
27  
28  
29  
30  
31  
32  
33  
34  
35  
36  
37  
38  
39  
40  
41  
42  
43  
44  
45  
46  
47  
48  
49  
50  
51  
52  
53  
54  
55  
56  
57  
58  
59  
60

The actual performance of euthanasia must be done by one of the physicians of the consultative team. The act of euthanasia as well as the name of the acting physician should be written in the patient's chart.

Physician - prescribing medication

For peer review only

1  
2 We have had the help of others including general practitioners,  
3 nurses, ambulance personnel and the thrombosis service.  
4  
5  
6  
7  
8  
9  
10  
11  
12  
13  
14  
15  
16  
17  
18  
19  
20  
21  
22  
23  
24  
25

26 Physicians - prescribe and administer medication  
27  
28 Nurses - often administer life-ending medication, though this is not  
29 legal  
30  
31  
32  
33  
34  
35  
36  
37  
38  
39  
40  
41  
42  
43  
44  
45  
46  
47  
48  
49  
50  
51  
52  
53  
54  
55  
56  
57  
58  
59  
60

1  
2  
3  
4  
5  
6  
7  
8  
9  
10  
11  
12  
13  
14  
15  
16  
17  
18  
19  
20  
21  
22  
23  
24  
25  
26  
27  
28  
29  
30  
31  
32  
33  
34  
35  
36  
37  
38  
39  
40  
41  
42  
43  
44  
45  
46  
47  
48  
49  
50  
51  
52  
53  
54  
55  
56  
57  
58  
59  
60

Physicians prescribed lethal medications.

Not specified

For peer review only

1  
2  
3  
4  
5  
6  
7  
8  
9  
10  
11  
12  
13  
14  
15  
16  
17  
18  
19  
20  
21  
22  
23  
24  
25  
26  
27  
28  
29  
30  
31  
32  
33  
34  
35  
36  
37  
38  
39  
40  
41  
42  
43  
44  
45  
46  
47  
48  
49  
50  
51  
52  
53  
54  
55  
56  
57  
58  
59  
60

Physician - prescribing and administering medicatin

Physician - prescribing, preparing, administering medication  
Pharmacist - dispensing medicaton

For peer review only



1  
2 Usually, several other professionals besides the treating  
3 physician are involved such as a head nurse and/or a priest. On  
4 the other hand, involvement of pharmacy technicians in the  
5 preparation of euthanasia drugs is discouraged. Strictly speaking,  
6 a physician involves a pharmacist in a mercy-full killing by  
7 asking him to dispense drugs to perform euthanasia.  
8  
9

10 Physician - administering medication  
11 Palliative support team - present while physician administers  
12 euthanetics  
13 Nurse - assists physician, is present while physician administers  
14 euthanetica  
15  
16  
17  
18  
19  
20  
21  
22  
23  
24  
25  
26  
27  
28  
29  
30  
31  
32  
33  
34  
35  
36  
37  
38  
39  
40  
41  
42  
43

44 The doctor must be present during the preparation of the medicines  
45 and, if necessary, he will carry out the dilutions himself.  
46  
47  
48  
49  
50  
51  
52  
53  
54  
55  
56  
57  
58  
59  
60

1  
2 Nurses may provide care and comfort to the patient and family  
3 through all stages of the dying process and teach the patient  
4 and family about the process of dying and what they may  
5 expect. Nurses may not inject or administer the medication that  
6 will lead to the end of the patient's life; this is an act  
7 precluded by law. If a nurse does not want to be involved with a  
8 patient who has made the choice to end his/her life within the  
9 provisions of the Death with Dignity Act, they may conscientiously  
10 object to being involved in delivering care. They are obliged to  
11 provide for the patient's safety, to avoid abandonment, and  
12 withdraw from the patient's care only when assured that  
13 alternative sources of care are available to the patient. They  
14 must transfer the responsibility for the patient's care to another  
15 provider.

16  
17  
18  
19 Physician - prescribing and administering medication  
20  
21  
22  
23  
24  
25  
26  
27  
28  
29  
30  
31  
32  
33  
34  
35  
36  
37  
38  
39  
40  
41  
42  
43  
44  
45  
46  
47  
48  
49  
50  
51  
52

53 Life-ending drugs were administered by the physician him/herself,  
54 or by a nurse while a doctor was present, and in one case by a nurse  
55 alone.  
56  
57  
58  
59  
60

1  
2  
3  
4  
5  
6  
7  
8  
9  
10  
11  
12  
13  
14  
15  
16  
17  
18  
19  
20  
21  
22  
23  
24  
25  
26  
27  
28  
29  
30  
31  
32  
33  
34  
35  
36  
37  
38  
39  
40  
41  
42  
43  
44  
45  
46  
47  
48  
49  
50  
51  
52  
53  
54  
55  
56  
57  
58  
59  
60

Physician - prescribing and administering medication

For peer review only

Only physicians should be allowed to perform euthanasia and that euthanasia can only take place within a physician-patient relationship.

Not specified

1  
2  
3  
4  
5  
6  
7  
8  
9  
10  
11  
12  
13  
14  
15  
16  
17  
18  
19  
20  
21  
22  
23  
24  
25  
26  
27  
28  
29  
30  
31  
32  
33  
34  
35  
36  
37  
38  
39  
40  
41  
42  
43  
44  
45  
46  
47  
48  
49  
50  
51  
52  
53  
54  
55  
56  
57  
58  
59  
60

Not specified

Physician - administering drugs

For peer review only

1  
2  
3  
4  
5  
6  
7  
8  
9  
10  
11  
12  
13  
14  
15  
16  
17  
18  
19  
20  
21  
22  
23  
24  
25  
26  
27  
28  
29  
30  
31  
32  
33  
34  
35  
36  
37  
38  
39  
40  
41  
42  
43  
44  
45  
46  
47  
48  
49  
50  
51  
52  
53  
54  
55  
56  
57  
58  
59  
60

Physician - prescribing and administering medication  
Nurse - Occasionally administering medication

Physicians - prescribe and administer medication  
- Nurse - in some cases, was reported to administer medication

For peer review only

1  
2  
3  
4  
5  
6  
7  
8  
9  
10  
11  
12  
13  
14  
15  
16  
17  
18  
19  
20  
21  
22  
23  
24  
25  
26  
27  
28  
29  
30  
31  
32  
33  
34  
35  
36  
37  
38  
39  
40  
41  
42  
43  
44  
45  
46  
47  
48  
49  
50  
51  
52  
53  
54  
55  
56  
57  
58  
59  
60

Physician - prescribing and administering medication

Physicians - administering medication

For peer review only

1  
2  
3  
4  
5  
6  
7  
8  
9  
10  
11  
12  
13  
14  
15  
16  
17  
18  
19  
20  
21  
22  
23  
24  
25  
26  
27  
28  
29  
30  
31  
32  
33  
34  
35  
36  
37  
38  
39  
40  
41  
42  
43  
44  
45  
46  
47  
48  
49  
50  
51  
52  
53  
54  
55  
56  
57  
58  
59  
60

Physician - prescribing and administering medication  
Nurse - Assisting physician, occasionally administering medication  
(though not legal), in 15.4% of cases

For peer review only

Physicians - prescribing and administerin medication  
Nurses - administering medication alleviate pain and symptoms;

1  
2  
3  
4  
5  
6  
7  
8  
9  
10  
11  
12  
13  
14  
15  
16  
17  
18  
19  
20  
21  
22  
23  
24  
25  
26  
27  
28  
29  
30  
31  
32  
33  
34  
35  
36  
37  
38  
39  
40  
41  
42  
43  
44  
45  
46  
47  
48  
49  
50  
51  
52  
53  
54  
55  
56  
57  
58  
59  
60

Physicians - prescribing and administerin medication

For peer review only



1  
2  
3  
4  
5  
6  
7  
8  
9  
10  
11  
12  
13  
14  
15  
16  
17  
18  
19  
20  
21  
22  
23  
24  
25  
26  
27  
28  
29  
30  
31  
32  
33  
34  
35  
36  
37  
38  
39  
40  
41  
42  
43  
44  
45  
46  
47  
48  
49  
50  
51  
52  
53  
54  
55  
56  
57  
58  
59  
60

Physician - prescribe and administer life-ending medications

For peer review only

1  
2  
3  
4  
5  
6  
7  
8  
9  
10  
11  
12  
13  
14  
15  
16  
17  
18  
19  
20  
21  
22  
23  
24  
25  
26  
27  
28  
29  
30  
31  
32  
33  
34  
35  
36  
37  
38  
39  
40  
41  
42  
43  
44  
45  
46  
47  
48  
49  
50  
51  
52  
53  
54  
55  
56  
57  
58  
59  
60

Physician - administering medication

For peer review only

1  
2 Not specified  
3  
4  
5  
6  
7  
8  
9  
10  
11  
12  
13  
14  
15  
16  
17  
18  
19  
20  
21  
22  
23  
24  
25  
26  
27  
28  
29  
30  
31  
32  
33  
34  
35

36 Fourteen physicians wrote the prescriptions for the 15 patients  
37 that have obtained lethal prescriptions in the 14 months since the  
38 law has been in effect.  
39  
40

41  
42 Physicians - prescribe medication, offers support during self-  
43 administration, manages complications  
44 Pharmacists - dispense medication  
45 NGO volunteer - Pick up and deliver medication, prepare  
46 medications, hand them to patient for self-administration.  
47  
48  
49  
50  
51  
52  
53  
54  
55  
56  
57  
58  
59  
60

1  
2 Physician and NP who are administering initial form 6 next to each  
3 MAID criterion. The pharmacist initials that the physician has signed  
4 the criteria. There is a checklist to ensure the pharmacist and  
5 physicina/NP discuss the protocol, scheduled time, time required to  
6 prepare the medications; how to complete the MAR; procedure for  
7 returning unused drugs to pharmacy.  
8  
9  
10  
11  
12  
13  
14  
15  
16  
17  
18  
19  
20  
21  
22  
23  
24  
25  
26  
27  
28  
29  
30  
31  
32  
33  
34  
35  
36  
37  
38  
39  
40  
41  
42  
43  
44  
45  
46  
47  
48  
49  
50  
51  
52  
53  
54  
55  
56  
57  
58  
59  
60

1  
2 Due care for pharmacists — provides agents; can request  
3 information from physician if needed; check the prescription;  
4 give verbal instructions regarding practical and technical  
5 conduct, storage. The pharmacist monitors whether the  
6 pharmacological matters regarding the termination of life are  
7 conducted in a responsible manner using the correct  
8 medication and the correct dosages. The pharmacist is – in the  
9 event that he or she prepares the syringes, elastomeric pump,  
10 infu-  
11 sion bag or drink – responsible for the preparation and the  
12 labelling.

13  
14  
15 Physicians must remain present for the whole procedure and  
16 are the only ones who can administer voluntary euthanasia.  
17 The doctor bears final responsibility for the practice of  
18 euthanasia or physician-assisted suicide, including the  
19 selection of the medication used and the dosages  
20 administered. Only the doctor is permitted to administer the of  
21 euthanatic agents or assist the patient in taking them.  
22  
23  
24  
25  
26  
27  
28  
29  
30  
31  
32  
33  
34  
35

36 Physician: administer medications

37  
38 Pharmacists: Dispensing medications  
39  
40  
41  
42  
43  
44  
45  
46  
47  
48  
49  
50  
51  
52  
53  
54  
55  
56  
57  
58  
59  
60

1  
2 prescription associated with AID including documentation and  
3 labelling with the following additional considerations:  
4 The pharmacy will not fill any prescription that is not patient  
5 specific.  
6  
7 The pharmacy will not supply these kits as ward stock or allow these  
8 kits to be dispensed as office supply.  
9  
10 Transport of these kits will be a direct hand-off to the prescribing  
11 physician who is assigned to receive the kit on behalf of the patient.  
12 These kits will be created on a patient specific basis and will not be  
13 created and stored for future use.  
14  
15 Each kit will contain instructions, as per the agreed upon protocol,  
16 on dosing, administration and proper handling of the medications  
17 (including disposal).  
18  
19 The pharmacy will always ensure that there are two kits available for  
20 use for any patient receiving AID.  
21  
22 Once created these kits are to be treated as narcotic agents:  
23 Securely stored with limited staff access and no public access until  
24 they are to be dispensed to the physician; and  
25  
26 Noted with signatures for every transfer of location to be accounted  
27 for at all times. The dispensing pharmacist will ensure that the  
28 physician accepting the kits has been noted as the assigned  
29 physician to receive the kit(s). If there is doubt regarding the identity  
30 of the physician that is to receive the kit, the pharmacist will take  
31 steps to confirm the physician's identity to their satisfaction before  
32 dispensing. This may include asking the physician for identification if  
33 warranted.  
34  
35  
36  
37  
38  
39  
40  
41  
42  
43  
44  
45  
46  
47  
48  
49  
50  
51  
52  
53  
54  
55  
56  
57  
58  
59  
60

1  
2 MAID coordinator/Unit manager/MAID APN to meet with floor  
3 staff to discuss the case, what to expect, any concerns (as  
4 necessary)  
5

6 MAID coordinator will contact pharmacy to ensure the  
7 medications will be ready for pick and will pick up and bring  
8 back the unused medications to pharmacy  
9

10 Establish that the patient has an IV line running (confirm with  
11 physician)  
12

13 Establish that all the patient's holistic plan is in place Ensure  
14 all the original forms are on the unit for the intervention  
15  
16  
17  
18  
19  
20  
21  
22  
23  
24  
25  
26  
27  
28  
29  
30  
31  
32  
33  
34

35  
36 Not specified  
37  
38  
39  
40  
41  
42  
43  
44  
45  
46  
47

48 Not specified  
49  
50  
51  
52  
53  
54  
55  
56  
57  
58  
59  
60

1  
2  
3  
4  
5  
6  
7  
8  
9  
10  
11  
12  
13  
14  
15  
16  
17  
18  
19  
20  
21  
22  
23  
24  
25  
26  
27  
28  
29  
30  
31  
32  
33  
34  
35  
36  
37  
38  
39  
40  
41  
42  
43  
44  
45  
46  
47  
48  
49  
50  
51  
52  
53  
54  
55  
56  
57  
58  
59  
60

Not specified

Not specified

Physician/NP— prescribe, inject. Pharmacist— dispense and sign.

For peer review only



1  
2  
3  
4  
5  
6  
7  
8  
9  
10  
11  
12  
13  
14  
15  
16  
17  
18  
19  
20  
21  
22  
23  
24  
25  
26  
27  
28  
29  
30  
31  
32  
33  
34  
35  
36  
37  
38  
39  
40  
41  
42  
43  
44  
45  
46  
47  
48  
49  
50  
51  
52  
53  
54  
55  
56  
57  
58  
59  
60

Not specified

Not specified

- Physician - prescribing and administering medications  
- Pharmacist - Dispensing medication - NP -  
administering medications

For peer review only

|                                                                                                                                                                                  |                                                                                                                                                                                                                                  |
|----------------------------------------------------------------------------------------------------------------------------------------------------------------------------------|----------------------------------------------------------------------------------------------------------------------------------------------------------------------------------------------------------------------------------|
| 1<br>2<br>3<br>4<br>5<br>6<br>7<br>8<br>9<br>10<br>11<br>12<br>13<br>14<br>15<br>16<br>17<br>18                                                                                  | - Physician - prescribing and administering medications (if IV route)<br>- Pharmacist - Dispensing medication                                                                                                                    |
| 19<br>20<br>21<br>22<br>23<br>24<br>25<br>26<br>27<br>28<br>29<br>30                                                                                                             | physician to notify chief medical examiner and complete required documentation. physician to inject medications and be present from the time MAID medications are administered until patient has died. A documentation checklist |
| 31<br>32<br>33<br>34<br>35<br>36<br>37<br>38<br>39<br>40<br>41<br>42<br>43<br>44<br>45<br>46<br>47<br>48<br>49<br>50<br>51<br>52<br>53<br>54<br>55<br>56<br>57<br>58<br>59<br>60 | Not specified                                                                                                                                                                                                                    |

1  
2  
3  
4  
5  
6  
7  
8  
9  
10  
11  
12  
13  
14  
15  
16  
17  
18  
19  
20  
21  
22  
23  
24  
25  
26  
27  
28  
29  
30  
31  
32  
33  
34  
35  
36  
37  
38  
39  
40  
41  
42  
43  
44  
45  
46  
47  
48  
49  
50  
51  
52  
53  
54  
55  
56  
57  
58  
59  
60

Physician/NP to inject MAID MAR completed with the pharmacist,

For peer review only

physicians inject and document. Date and time of administration of protocol; main and backup kits prepared ; time required to prepare medications; discussion of storage and stability; discuss process to complete MAR; discuss process of retiring used and unused kits to pharmacy

1  
2 - Physician - prescribing and administering medication  
3 - Pharmacist - dispensing medication and offering knowledge  
4 support to physician  
5  
6  
7  
8  
9  
10  
11  
12  
13  
14  
15  
16  
17  
18  
19  
20  
21  
22  
23  
24

25  
26 Not specified  
27  
28  
29  
30  
31  
32  
33  
34  
35  
36  
37  
38  
39  
40  
41  
42  
43

44 Physician - prescribes medication. No requirement that a physician  
45 is present for the act.  
46  
47  
48  
49  
50  
51  
52  
53  
54  
55  
56  
57  
58  
59  
60

1  
2  
3  
4  
5  
6  
7  
8  
9  
10  
11  
12  
13  
14  
15  
16  
17  
18  
19  
20  
21  
22  
23  
24  
25  
26  
27  
28  
29  
30  
31  
32  
33  
34  
35  
36  
37  
38  
39  
40  
41  
42  
43  
44  
45  
46  
47  
48  
49  
50  
51  
52  
53  
54  
55  
56  
57  
58  
59  
60

Physician - assesses decision-making capacity, oversees an informed decision process, prescribes medication  
Hospice staff - 78% of Washington hospices restrict staff from being present

Nurses: assisting the patient, the patient's family, and physician by being present

For peer review only

1  
2 Physician - Evaluating request, administering medication  
3  
4  
5  
6  
7  
8  
9  
10  
11  
12  
13  
14  
15  
16  
17

18  
19 Physician - prescribing and administering medication  
20  
21  
22  
23  
24  
25  
26  
27  
28  
29  
30  
31  
32  
33  
34  
35  
36  
37  
38  
39  
40  
41  
42  
43

44 -Physician - prescribing and administering medications (if IV route)  
45 - Nurses - prepare lethal drugs, prepare IV lines, bring drugs from  
46 pharmacy  
47  
48  
49  
50  
51  
52  
53  
54  
55  
56  
57  
58  
59  
60

1  
2  
3  
4  
5  
6  
7  
8  
9  
10  
11  
12  
13  
14  
15  
16  
17  
18  
19  
20  
21  
22  
23  
24  
25  
26  
27  
28  
29  
30  
31  
32  
33  
34  
35  
36  
37  
38  
39  
40  
41  
42  
43  
44  
45  
46  
47  
48  
49  
50  
51  
52  
53  
54  
55  
56  
57  
58  
59  
60

Physician - Prescribing medication  
Pharmacist - dispensing medication, report to Department of Human Services

Not specified

For peer review only

1  
2 Physicians - prescribing medication  
3  
4  
5  
6  
7  
8  
9  
10  
11  
12  
13  
14  
15  
16  
17  
18  
19  
20

21  
22 - Physician - Administer drugs for euthanasia, order and obtain drugs  
23 from pharmacist, occasionally present when drugs are administered  
24 in assisted suicide  
25 - Pharmacist - dispensing medications  
26 - Nurse - assisting with decision making process, prepare  
27 medications, consulted during performance  
28 (See Table 4 for full details of guidelines)  
29  
30  
31  
32  
33  
34  
35  
36  
37  
38  
39  
40  
41  
42  
43  
44  
45  
46  
47  
48  
49  
50  
51  
52  
53  
54  
55  
56  
57  
58  
59  
60



1  
2 Physician - prescribing and administering medication, assessing  
3 mental capacity  
4  
5  
6  
7  
8  
9  
10  
11  
12  
13  
14  
15  
16  
17  
18  
19  
20

21  
22 Physician - to listen to the request; to inform the resident about the  
23 law, euthanasia policy, or palliative options; to be responsible for  
24 euthanasia decision-making, and to be responsible for the  
25 administration of the euthanatica and for administrative aftercare  
26  
27 Nurses - to primarily listen to the request, to offer the patient  
28 palliative care, and to participate in euthanasia  
29 decision-making, to support the team during administration of  
30 euthanatica  
31  
32  
33  
34  
35  
36  
37  
38  
39  
40  
41  
42  
43  
44  
45  
46  
47

48 Not specified  
49  
50  
51  
52  
53  
54  
55  
56  
57  
58  
59  
60

1  
2 Physician: role limited to assessing competence and prescribing  
3 medications  
4  
5  
6  
7  
8  
9  
10  
11  
12  
13  
14  
15  
16  
17  
18  
19  
20  
21  
22  
23  
24

25  
26 - Physician - prescribing and administering medication  
27  
28  
29  
30  
31  
32  
33  
34  
35  
36  
37  
38  
39  
40

41 Physician - administering drugs

42 Nurse - assisting physician - sometimes administered life-ending  
43 medication, but mostly in cases where there was no explicit  
44 euthanasia request  
45  
46  
47  
48  
49  
50  
51  
52  
53  
54  
55  
56  
57  
58  
59  
60

1  
2  
3  
4  
5  
6  
7  
8  
9  
10  
11  
12  
13  
14  
15  
16  
17  
18  
19  
20  
21  
22  
23  
24  
25  
26  
27  
28  
29  
30  
31  
32  
33  
34  
35  
36  
37  
38  
39  
40  
41  
42  
43  
44  
45  
46  
47  
48  
49  
50  
51  
52  
53  
54  
55  
56  
57  
58  
59  
60

Four-teen of the 22 physicians were in family practice or internal medicine, 5 were oncologists, and 3 were in other specialties.

Physicians - prescribing medication

For peer review only

1  
2 Prescribing MD present (5%); other provider present (70%); no  
3 provider (24%); unknown 1%) n = 202  
4  
5  
6  
7  
8  
9  
10  
11  
12  
13  
14  
15  
16  
17  
18  
19  
20  
21  
22  
23  
24  
25  
26  
27  
28  
29  
30  
31  
32  
33  
34  
35

36 Prescription, consent, IV injection. Confirmation of coma  
37  
38  
39  
40  
41  
42  
43  
44  
45  
46  
47  
48  
49  
50  
51  
52  
53  
54  
55  
56  
57  
58  
59  
60

1  
2  
3  
4  
5  
6  
7  
8  
9  
10  
11  
12  
13  
14  
15  
16  
17  
18  
19  
20  
21  
22  
23  
24  
25  
26  
27  
28  
29  
30  
31  
32  
33  
34  
35  
36  
37  
38  
39  
40  
41  
42  
43  
44  
45  
46  
47  
48  
49  
50  
51  
52  
53  
54  
55  
56  
57  
58  
59  
60

Physician - administering drugs, declaring cardiac death

For peer review only

1  
2  
3  
4  
5  
6  
7  
8  
9  
10  
11  
12  
13  
14  
15  
16  
17  
18  
19  
20  
21  
22  
23  
24  
25  
26  
27  
28  
29  
30  
31  
32  
33  
34  
35  
36  
37  
38  
39  
40  
41  
42  
43  
44  
45  
46  
47  
48  
49  
50  
51  
52  
53  
54  
55  
56  
57  
58  
59  
60

Physicians - prescribing and administering medication

For peer review only

1  
2  
3  
4  
5  
6  
7  
8  
9  
10  
11  
12  
13  
14  
15  
16  
17  
18  
19  
20  
21  
22  
23  
24  
25  
26  
27  
28  
29  
30  
31  
32  
33  
34  
35  
36  
37  
38  
39  
40  
41  
42  
43  
44  
45  
46  
47  
48  
49  
50  
51  
52  
53  
54  
55  
56  
57  
58  
59  
60

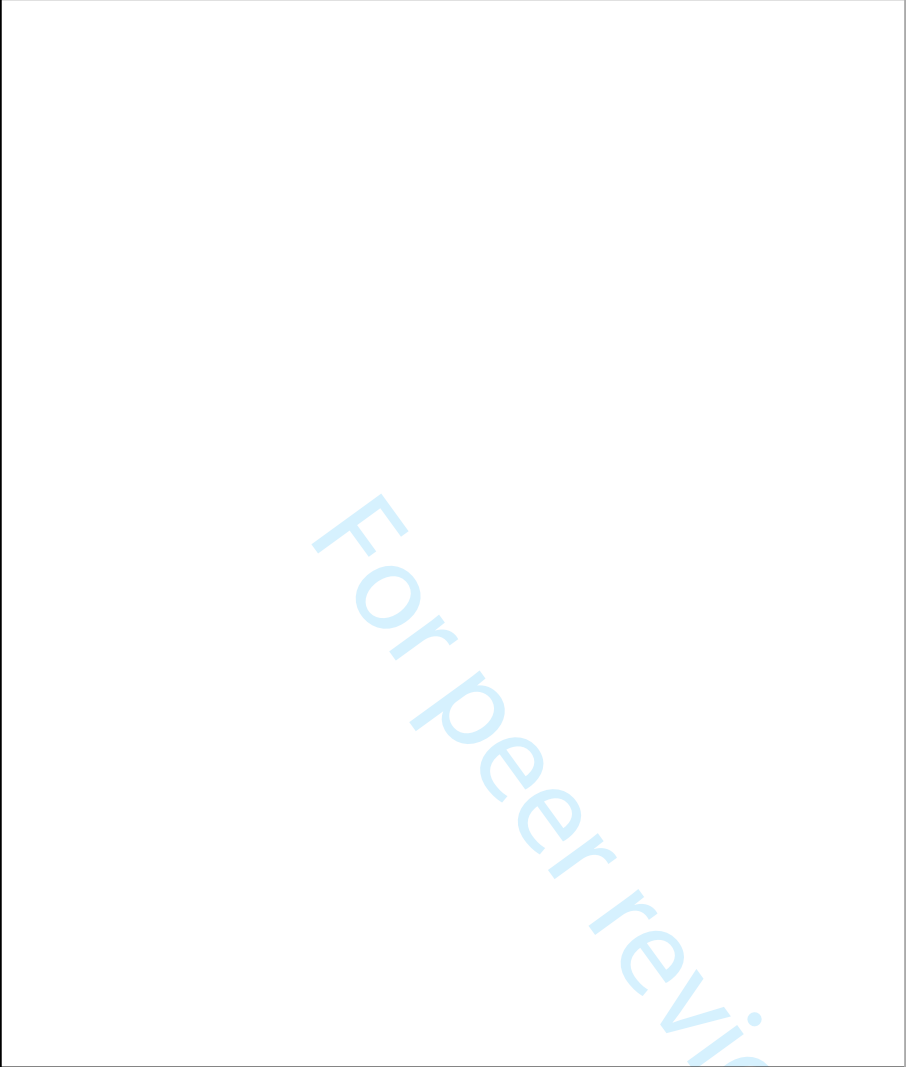

For peer review only

1  
2  
3  
4  
5  
6  
7  
8  
9  
10  
11  
12  
13  
14  
15  
16  
17  
18  
19  
20  
21  
22  
23  
24  
25  
26  
27  
28  
29  
30  
31  
32  
33  
34  
35  
36  
37  
38  
39  
40  
41  
42  
43  
44  
45  
46  
47  
48  
49  
50  
51  
52  
53  
54  
55  
56  
57  
58  
59  
60

| <b><i>Role of Families</i></b> | <b><i>Safety Checks and Documentation</i></b> |
|--------------------------------|-----------------------------------------------|
| Not specified                  |                                               |
| Not specified                  |                                               |
| Not Specified                  | Not specified                                 |

For peer review only



1  
2  
3  
4  
5  
6  
7  
8  
9  
10  
11  
12  
13  
14  
15  
16  
17  
18  
19  
20  
21  
22  
23  
24  
25  
26  
27  
28  
29  
30  
31  
32  
33  
34  
35  
36  
37  
38  
39  
40  
41  
42  
43  
44  
45  
46  
47  
48  
49  
50  
51  
52  
53  
54  
55  
56  
57  
58  
59  
60

|               |               |
|---------------|---------------|
| Not specified | Not specified |
| Not Specified | Not specified |

For peer review only

1  
2  
3  
4  
5  
6  
7  
8  
9  
10  
11  
12  
13  
14  
15  
16  
17  
18  
19  
20  
21  
22  
23  
24  
25  
26  
27  
28  
29  
30  
31  
32  
33  
34  
35  
36  
37  
38  
39  
40  
41  
42  
43  
44  
45  
46  
47  
48  
49  
50  
51  
52  
53  
54  
55  
56  
57  
58  
59  
60

|                                     |               |
|-------------------------------------|---------------|
| Not specified                       |               |
| Not specified                       |               |
| Present during euthanasia procedure | Not specified |

For peer review only

1  
2  
3  
4  
5  
6  
7  
8  
9  
10  
11  
12  
13  
14  
15  
16  
17  
18  
19  
20  
21  
22  
23  
24  
25  
26  
27  
28  
29  
30  
31  
32  
33  
34  
35  
36  
37  
38  
39  
40  
41  
42  
43  
44  
45  
46  
47  
48  
49  
50  
51  
52  
53  
54  
55  
56  
57  
58  
59  
60

|                                     |               |
|-------------------------------------|---------------|
| Present at bedside during procedure | Not specified |
| Not Specified                       | Not specified |

For peer review only

1  
2  
3  
4  
5  
6  
7  
8  
9  
10  
11  
12  
13  
14  
15  
16  
17  
18  
19  
20  
21  
22  
23  
24  
25  
26  
27  
28  
29  
30  
31  
32  
33  
34  
35  
36  
37  
38  
39  
40  
41  
42  
43  
44  
45  
46  
47  
48  
49  
50  
51  
52  
53  
54  
55  
56  
57  
58  
59  
60

|               |               |
|---------------|---------------|
| Not specified |               |
| Not Specified | Not specified |

For peer review only

1  
2  
3  
4  
5  
6  
7  
8  
9  
10  
11  
12  
13  
14  
15  
16  
17  
18  
19  
20  
21  
22  
23  
24  
25  
26  
27  
28  
29  
30  
31  
32  
33  
34  
35  
36  
37  
38  
39  
40  
41  
42  
43  
44  
45  
46  
47  
48  
49  
50  
51  
52  
53  
54  
55  
56  
57  
58  
59  
60

|                                                                       |               |
|-----------------------------------------------------------------------|---------------|
| Not Specified                                                         | Not specified |
| Present for discussions around preparation of drug, and for ingestion | Not specified |

For peer review only

1  
2  
3  
4  
5  
6  
7  
8  
9  
10  
11  
12  
13  
14  
15  
16  
17  
18  
19  
20  
21  
22  
23  
24  
25  
26  
27  
28  
29  
30  
31  
32  
33  
34  
35  
36  
37  
38  
39  
40  
41  
42  
43  
44  
45  
46  
47  
48  
49  
50  
51  
52  
53  
54  
55  
56  
57  
58  
59  
60

|               |               |
|---------------|---------------|
| Not Specified | Not specified |
|               |               |
|               |               |
| Not Specified | Not specified |

For peer review only

1  
2  
3  
4  
5  
6  
7  
8  
9  
10  
11  
12  
13  
14  
15  
16  
17  
18  
19  
20  
21  
22  
23  
24  
25  
26  
27  
28  
29  
30  
31  
32  
33  
34  
35  
36  
37  
38  
39  
40  
41  
42  
43  
44  
45  
46  
47  
48  
49  
50  
51  
52  
53  
54  
55  
56  
57  
58  
59  
60

|                                           |               |
|-------------------------------------------|---------------|
| Not Specified                             | Not specified |
| Sometimes present for self-administration | Not specified |

For peer review only

1  
2  
3  
4  
5  
6  
7  
8  
9  
10  
11  
12  
13  
14  
15  
16  
17  
18  
19  
20  
21  
22  
23  
24  
25  
26  
27  
28  
29  
30  
31  
32  
33  
34  
35  
36  
37  
38  
39  
40  
41  
42  
43  
44  
45  
46  
47  
48  
49  
50  
51  
52  
53  
54  
55  
56  
57  
58  
59  
60

|               |               |
|---------------|---------------|
|               |               |
|               |               |
| Not Specified | Not specified |

For peer review only





|                                                                                                                                                                                                                                                                                                                                                                                                                                                                                                                                                                                                                                                        |                      |
|--------------------------------------------------------------------------------------------------------------------------------------------------------------------------------------------------------------------------------------------------------------------------------------------------------------------------------------------------------------------------------------------------------------------------------------------------------------------------------------------------------------------------------------------------------------------------------------------------------------------------------------------------------|----------------------|
| <p>1<br/>2<br/>3<br/>4<br/>5<br/>6<br/>7<br/>8<br/>9<br/>10<br/>11<br/>12<br/>13<br/>14<br/>15<br/>16<br/>17<br/>18<br/>19<br/>20<br/>21<br/>22<br/>23<br/>24<br/>25<br/>26<br/>27<br/>28<br/>29</p> <p>GPs reported having consulted others in advance in three-quarters of the at-home end-of-life decision (ELD) cases. They consulted a health care worker (with or without a family member) in 43% of cases, and in 31% they consulted a family member but no health care worker. Physicians in institutions reported consultations in 85% of all ELDs: usually a health care worker (78%) was involved and rarely only a family member (6%).</p> |                      |
|                                                                                                                                                                                                                                                                                                                                                                                                                                                                                                                                                                                                                                                        |                      |
| <p>30<br/>31<br/>32<br/>33<br/>34<br/>35<br/>36<br/>37<br/>38<br/>39<br/>40<br/>41<br/>42<br/>43<br/>44<br/>45<br/>46<br/>47<br/>48<br/>49<br/>50</p> <p>Not Specified</p>                                                                                                                                                                                                                                                                                                                                                                                                                                                                             | <p>Not specified</p> |
| <p>51<br/>52<br/>53<br/>54<br/>55<br/>56<br/>57<br/>58<br/>59<br/>60</p> <p>Relatives, friends often assisted and were present during the ingestion of lethal medications.</p>                                                                                                                                                                                                                                                                                                                                                                                                                                                                         |                      |

1  
2  
3  
4  
5  
6  
7  
8  
9  
10  
11  
12  
13  
14  
15  
16  
17  
18  
19  
20  
21  
22  
23  
24  
25  
26  
27  
28  
29  
30  
31  
32  
33  
34  
35  
36  
37  
38  
39  
40  
41  
42  
43  
44  
45  
46  
47  
48  
49  
50  
51  
52  
53  
54  
55  
56  
57  
58  
59  
60

|  |  |
|--|--|
|  |  |
|  |  |

For peer review only

1  
2  
3  
4  
5  
6  
7  
8  
9  
10  
11  
12  
13  
14  
15  
16  
17  
18  
19  
20  
21  
22  
23  
24  
25  
26  
27  
28  
29  
30  
31  
32  
33  
34  
35  
36  
37  
38  
39  
40  
41  
42  
43  
44  
45  
46  
47  
48  
49  
50  
51  
52  
53  
54  
55  
56  
57  
58  
59  
60

|               |               |
|---------------|---------------|
|               |               |
|               |               |
| Not specified | Not specified |
|               |               |

For peer review only

1  
2  
3  
4  
5  
6  
7  
8  
9  
10  
11  
12  
13  
14  
15  
16  
17  
18  
19  
20  
21  
22  
23  
24  
25  
26  
27  
28  
29  
30  
31  
32  
33  
34  
35  
36  
37  
38  
39  
40  
41  
42  
43  
44  
45  
46  
47  
48  
49  
50  
51  
52  
53  
54  
55  
56  
57  
58  
59  
60

|                                                                      |               |
|----------------------------------------------------------------------|---------------|
|                                                                      |               |
| Fully informed of decision, and present for administration of drugs. | Not specified |
|                                                                      |               |
| Patients and Families were sending requests to physicians.           |               |
|                                                                      |               |

1  
2  
3  
4  
5  
6  
7  
8  
9  
10  
11  
12  
13  
14  
15  
16  
17  
18  
19  
20  
21  
22  
23  
24  
25  
26  
27  
28  
29  
30  
31  
32  
33  
34  
35  
36  
37  
38  
39  
40  
41  
42  
43  
44  
45  
46  
47  
48  
49  
50  
51  
52  
53  
54  
55  
56  
57  
58  
59  
60

|                                                                                                                                                               |  |
|---------------------------------------------------------------------------------------------------------------------------------------------------------------|--|
| <p>The Guidebook encourages family involvement in decision making on this important issue, and advocates full information and planning for complications.</p> |  |
|                                                                                                                                                               |  |
|                                                                                                                                                               |  |

For peer review only



1  
2  
3  
4  
5  
6  
7  
8  
9  
10  
11  
12  
13  
14  
15  
16  
17  
18  
19  
20  
21  
22  
23  
24  
25  
26  
27  
28  
29  
30  
31  
32  
33  
34  
35  
36  
37  
38  
39  
40  
41  
42  
43  
44  
45  
46  
47  
48  
49  
50  
51  
52  
53  
54  
55  
56  
57  
58  
59  
60

|  |  |
|--|--|
|  |  |
|  |  |

For peer review only



1  
2  
3  
4  
5  
6  
7  
8  
9  
10  
11  
12  
13  
14  
15  
16  
17  
18  
19  
20  
21  
22  
23  
24  
25  
26  
27  
28  
29  
30  
31  
32  
33  
34  
35  
36  
37  
38  
39  
40  
41  
42  
43  
44  
45  
46  
47  
48  
49  
50  
51  
52  
53  
54  
55  
56  
57  
58  
59  
60

|  |  |
|--|--|
|  |  |
|  |  |
|  |  |

For peer review only

1  
2  
3  
4  
5  
6  
7  
8  
9  
10  
11  
12  
13  
14  
15  
16  
17  
18  
19  
20  
21  
22  
23  
24  
25  
26  
27  
28  
29  
30  
31  
32  
33  
34  
35  
36  
37  
38  
39  
40  
41  
42  
43  
44  
45  
46  
47  
48  
49  
50  
51  
52  
53  
54  
55  
56  
57  
58  
59  
60

|  |  |
|--|--|
|  |  |
|  |  |

For peer review only

1  
2  
3  
4  
5  
6  
7  
8  
9  
10  
11  
12  
13  
14  
15  
16  
17  
18  
19  
20  
21  
22  
23  
24  
25  
26  
27  
28  
29  
30  
31  
32  
33  
34  
35  
36  
37  
38  
39  
40  
41  
42  
43  
44  
45  
46  
47  
48  
49  
50  
51  
52  
53  
54  
55  
56  
57  
58  
59  
60

|                                            |                                                                                                       |
|--------------------------------------------|-------------------------------------------------------------------------------------------------------|
| <p>Present during euthanasia procedure</p> | <p>Room should be spacious enough so that family being present does not interfere with procedure.</p> |
|                                            |                                                                                                       |
|                                            |                                                                                                       |

For peer review only

1  
2  
3  
4  
5  
6  
7  
8  
9  
10  
11  
12  
13  
14  
15  
16  
17  
18  
19  
20  
21  
22  
23  
24  
25  
26  
27  
28  
29  
30  
31  
32  
33  
34  
35  
36  
37  
38  
39  
40  
41  
42  
43  
44  
45  
46  
47  
48  
49  
50  
51  
52  
53  
54  
55  
56  
57  
58  
59  
60

|               |               |
|---------------|---------------|
| Not Specified | Not specified |
| Not Specified | Not specified |

For peer review only

1  
2  
3  
4  
5  
6  
7  
8  
9  
10  
11  
12  
13  
14  
15  
16  
17  
18  
19  
20  
21  
22  
23  
24  
25  
26  
27  
28  
29  
30  
31  
32  
33  
34  
35  
36  
37  
38  
39  
40  
41  
42  
43  
44  
45  
46  
47  
48  
49  
50  
51  
52  
53  
54  
55  
56  
57  
58  
59  
60

|               |               |
|---------------|---------------|
| Not Specified | Not specified |
|               |               |

For peer review only

1  
2  
3  
4  
5  
6  
7  
8  
9  
10  
11  
12  
13  
14  
15  
16  
17  
18  
19  
20  
21  
22  
23  
24  
25  
26  
27  
28  
29  
30  
31  
32  
33  
34  
35  
36  
37  
38  
39  
40  
41  
42  
43  
44  
45  
46  
47  
48  
49  
50  
51  
52  
53  
54  
55  
56  
57  
58  
59  
60

|               |               |
|---------------|---------------|
| Not Specified | Not specified |
|               |               |

For peer review only

1  
2  
3  
4  
5  
6  
7  
8  
9  
10  
11  
12  
13  
14  
15  
16  
17  
18  
19  
20  
21  
22  
23  
24  
25  
26  
27  
28  
29  
30  
31  
32  
33  
34  
35  
36  
37  
38  
39  
40  
41  
42  
43  
44  
45  
46  
47  
48  
49  
50  
51  
52  
53  
54  
55  
56  
57  
58  
59  
60

|                                                                                                                                    |  |
|------------------------------------------------------------------------------------------------------------------------------------|--|
|                                                                                                                                    |  |
| <p style="text-align: center; color: lightblue; font-size: 2em; transform: rotate(-45deg); opacity: 0.5;">For peer review only</p> |  |
|                                                                                                                                    |  |

1  
2  
3  
4  
5  
6  
7  
8  
9  
10  
11  
12  
13  
14  
15  
16  
17  
18  
19  
20  
21  
22  
23  
24  
25  
26  
27  
28  
29  
30  
31  
32  
33  
34  
35  
36  
37  
38  
39  
40  
41  
42  
43  
44  
45  
46  
47  
48  
49  
50  
51  
52  
53  
54  
55  
56  
57  
58  
59  
60

|               |               |
|---------------|---------------|
|               |               |
| Not Specified | Not specified |
| Not specified | Not specified |
|               |               |
|               |               |

For peer review only



1  
2  
3  
4  
5  
6  
7  
8  
9  
10  
11  
12  
13  
14  
15  
16  
17  
18  
19  
20  
21  
22  
23  
24  
25  
26  
27  
28  
29  
30  
31  
32  
33  
34  
35  
36  
37  
38  
39  
40  
41  
42  
43  
44  
45  
46  
47  
48  
49  
50  
51  
52  
53  
54  
55  
56  
57  
58  
59  
60

|               |               |
|---------------|---------------|
|               |               |
| Not specified | Not specified |

For peer review only

1  
2  
3  
4  
5  
6  
7  
8  
9  
10  
11  
12  
13  
14  
15  
16  
17  
18  
19  
20  
21  
22  
23  
24  
25  
26  
27  
28  
29  
30  
31  
32  
33  
34  
35  
36  
37  
38  
39  
40  
41  
42  
43  
44  
45  
46  
47  
48  
49  
50  
51  
52  
53  
54  
55  
56  
57  
58  
59  
60

|               |               |
|---------------|---------------|
|               |               |
| Not Specified | Not specified |

For peer review only

1  
2  
3  
4  
5  
6  
7  
8  
9  
10  
11  
12  
13  
14  
15  
16  
17  
18  
19  
20  
21  
22  
23  
24  
25  
26  
27  
28  
29  
30  
31  
32  
33  
34  
35  
36  
37  
38  
39  
40  
41  
42  
43  
44  
45  
46  
47  
48  
49  
50  
51  
52  
53  
54  
55  
56  
57  
58  
59  
60

|                                                   |  |
|---------------------------------------------------|--|
| Lethal medications were administered by families. |  |
|                                                   |  |

For peer review only

1  
2  
3  
4  
5  
6  
7  
8  
9  
10  
11  
12  
13  
14  
15  
16  
17  
18  
19  
20  
21  
22  
23  
24  
25  
26  
27  
28  
29  
30  
31  
32  
33  
34  
35  
36  
37  
38  
39  
40  
41  
42  
43  
44  
45  
46  
47  
48  
49  
50  
51  
52  
53  
54  
55  
56  
57  
58  
59  
60

|                                     |               |
|-------------------------------------|---------------|
| Present at bedside during procedure | Not specified |
| Not Specified                       | Not specified |

For peer review only

1  
2  
3  
4  
5  
6  
7  
8  
9  
10  
11  
12  
13  
14  
15  
16  
17  
18  
19  
20  
21  
22  
23  
24  
25  
26  
27  
28  
29  
30  
31  
32  
33  
34  
35  
36  
37  
38  
39  
40  
41  
42  
43  
44  
45  
46  
47  
48  
49  
50  
51  
52  
53  
54  
55  
56  
57  
58  
59  
60

|                                                                                                |               |
|------------------------------------------------------------------------------------------------|---------------|
|                                                                                                |               |
| May sometimes attend performance of euthanasia, sometimes participate in formulating care plan | Not specified |
|                                                                                                |               |

For peer review only

1  
2  
3  
4  
5  
6  
7  
8  
9  
10  
11  
12  
13  
14  
15  
16  
17  
18  
19  
20  
21  
22  
23  
24  
25  
26  
27  
28  
29  
30  
31  
32  
33  
34  
35  
36  
37  
38  
39  
40  
41  
42  
43  
44  
45  
46  
47  
48  
49  
50  
51  
52  
53  
54  
55  
56  
57  
58  
59  
60

|               |               |
|---------------|---------------|
|               |               |
| Not Specified | Not specified |
|               |               |

For peer review only

1  
2  
3  
4  
5  
6  
7  
8  
9  
10  
11  
12  
13  
14  
15  
16  
17  
18  
19  
20  
21  
22  
23  
24  
25  
26  
27  
28  
29  
30  
31  
32  
33  
34  
35  
36  
37  
38  
39  
40  
41  
42  
43  
44  
45  
46  
47  
48  
49  
50  
51  
52  
53  
54  
55  
56  
57  
58  
59  
60

|               |               |
|---------------|---------------|
| Not Specified | Not specified |
|               |               |
|               |               |

For peer review only

1  
2  
3  
4  
5  
6  
7  
8  
9  
10  
11  
12  
13  
14  
15  
16  
17  
18  
19  
20  
21  
22  
23  
24  
25  
26  
27  
28  
29  
30  
31  
32  
33  
34  
35  
36  
37  
38  
39  
40  
41  
42  
43  
44  
45  
46  
47  
48  
49  
50  
51  
52  
53  
54  
55  
56  
57  
58  
59  
60

|               |               |
|---------------|---------------|
| Not Specified | Not specified |
| Not Specified | Not specified |

For peer review only



1  
2  
3  
4  
5  
6  
7  
8  
9  
10  
11  
12  
13  
14  
15  
16  
17  
18  
19  
20  
21  
22  
23  
24  
25  
26  
27  
28  
29  
30  
31  
32  
33  
34  
35  
36  
37  
38  
39  
40  
41  
42  
43  
44  
45  
46  
47  
48  
49  
50  
51  
52  
53  
54  
55  
56  
57  
58  
59  
60

|                                                  |               |
|--------------------------------------------------|---------------|
| Not Specified                                    | Not specified |
| In some oral regimens, may administer medication | Not specified |

For peer review only

1  
2  
3  
4  
5  
6  
7  
8  
9  
10  
11  
12  
13  
14  
15  
16  
17  
18  
19  
20  
21  
22  
23  
24  
25  
26  
27  
28  
29  
30  
31  
32  
33  
34  
35  
36  
37  
38  
39  
40  
41  
42  
43  
44  
45  
46  
47  
48  
49  
50  
51  
52  
53  
54  
55  
56  
57  
58  
59  
60

|                                         |                      |
|-----------------------------------------|----------------------|
| <p>Not Specified</p>                    | <p>Not specified</p> |
| <p>Usually present at time of death</p> | <p>Not specified</p> |

For peer review only

1  
2  
3  
4  
5  
6  
7  
8  
9  
10  
11  
12  
13  
14  
15  
16  
17  
18  
19  
20  
21  
22  
23  
24  
25  
26  
27  
28  
29  
30  
31  
32  
33  
34  
35  
36  
37  
38  
39  
40  
41  
42  
43  
44  
45  
46  
47  
48  
49  
50  
51  
52  
53  
54  
55  
56  
57  
58  
59  
60

|               |               |
|---------------|---------------|
| Not Specified | Not specified |
| Not Specified | Not specified |

For peer review only

1  
2  
3  
4  
5  
6  
7  
8  
9  
10  
11  
12  
13  
14  
15  
16  
17  
18  
19  
20  
21  
22  
23  
24  
25  
26  
27  
28  
29  
30  
31  
32  
33  
34  
35  
36  
37  
38  
39  
40  
41  
42  
43  
44  
45  
46  
47  
48  
49  
50  
51  
52  
53  
54  
55  
56  
57  
58  
59  
60

|               |               |
|---------------|---------------|
| Not Specified | Not specified |
|---------------|---------------|

For peer review only

1  
2  
3  
4  
5  
6  
7  
8  
9  
10  
11  
12  
13  
14  
15  
16  
17  
18  
19  
20  
21  
22  
23  
24  
25  
26  
27  
28  
29  
30  
31  
32  
33  
34  
35  
36  
37  
38  
39  
40  
41  
42  
43  
44  
45  
46  
47  
48  
49  
50  
51  
52  
53  
54  
55  
56  
57  
58  
59  
60

|               |               |
|---------------|---------------|
| Not Specified | Not specified |
|---------------|---------------|

For peer review only

1  
2  
3  
4  
5  
6  
7  
8  
9  
10  
11  
12  
13  
14  
15  
16  
17  
18  
19  
20  
21  
22  
23  
24  
25  
26  
27  
28  
29  
30  
31  
32  
33  
34  
35  
36  
37  
38  
39  
40  
41  
42  
43  
44  
45  
46  
47  
48  
49  
50  
51  
52  
53  
54  
55  
56  
57  
58  
59  
60

|               |               |
|---------------|---------------|
| Not Specified | Not specified |
|---------------|---------------|

For peer review only

1  
2  
3  
4  
5  
6  
7  
8  
9  
10  
11  
12  
13  
14  
15  
16  
17  
18  
19  
20  
21  
22  
23  
24  
25  
26  
27  
28  
29  
30  
31  
32  
33  
34  
35  
36  
37  
38  
39  
40  
41  
42  
43  
44  
45  
46  
47  
48  
49  
50  
51  
52  
53  
54  
55  
56  
57  
58  
59  
60

|                                                      |                                                                                                                             |
|------------------------------------------------------|-----------------------------------------------------------------------------------------------------------------------------|
|                                                      |                                                                                                                             |
|                                                      |                                                                                                                             |
| In some cases, delivers drug for self-administration | Volunteers must pass psychological tests, in-depth interviews with psychologists, must work with mentor for several months. |

For peer review only

1  
2  
3  
4  
5  
6  
7  
8  
9  
10  
11  
12  
13  
14  
15  
16  
17  
18  
19  
20  
21  
22  
23  
24  
25  
26  
27  
28  
29  
30  
31  
32  
33  
34  
35  
36  
37  
38  
39  
40  
41  
42  
43  
44  
45  
46  
47  
48  
49  
50  
51  
52  
53  
54  
55  
56  
57  
58  
59  
60

|  |  |
|--|--|
|  |  |
|--|--|

For peer review only



1  
2  
3  
4  
5  
6  
7  
8  
9  
10  
11  
12  
13  
14  
15  
16  
17  
18  
19  
20  
21  
22  
23  
24  
25  
26  
27  
28  
29  
30  
31  
32  
33  
34  
35  
36  
37  
38  
39  
40  
41  
42  
43  
44  
45  
46  
47  
48  
49  
50  
51  
52  
53  
54  
55  
56  
57  
58  
59  
60

|               |                                                                                                                                                                                                                                                                                                                                                       |
|---------------|-------------------------------------------------------------------------------------------------------------------------------------------------------------------------------------------------------------------------------------------------------------------------------------------------------------------------------------------------------|
|               | <p>Filing and storage of request for medication x 15 years. Anonymous questionnaire to be sent in once MAID provided by physician, describing dose route, complications, where the procedure took place, etc. Pharmacist questionnaire about discussion, time from request to dispensation, whether prep took place in the pharmacy or elsewhere,</p> |
| Not Specified | Not specified                                                                                                                                                                                                                                                                                                                                         |

1  
2 The patient will be asked if there are any supports  
3 he/she needs (e.g., an AID-trained nurse, social  
4 worker, spiritual care practitioner, ethicist) so  
5 that these can be arranged. A holistic end of life  
6 care plan will be developed in collaboration with  
7 the patient, the patient's family (with the  
8 patient's consent), the AID-PT team, and the  
9 interprofessional team, if applicable. If the  
10 patient wishes to have children present at the  
11 time of provision of AID, referrals to resources to  
12 help prepare the children will be recommended.  
13  
14  
15  
16  
17  
18  
19  
20  
21  
22  
23  
24  
25  
26  
27  
28  
29  
30  
31  
32  
33  
34  
35  
36  
37  
38  
39  
40  
41  
42  
43  
44  
45  
46  
47  
48  
49  
50  
51  
52  
53  
54  
55  
56  
57  
58  
59  
60

1  
2  
3  
4  
5  
6  
7  
8  
9  
10  
11  
12  
13  
14  
15  
16  
17  
18  
19  
20  
21  
22  
23  
24  
25  
26  
27  
28  
29  
30  
31  
32  
33  
34  
35  
36  
37  
38  
39  
40  
41  
42  
43  
44  
45  
46  
47  
48  
49  
50  
51  
52  
53  
54  
55  
56  
57  
58  
59  
60

|                                                                                                                                                                                                           |  |
|-----------------------------------------------------------------------------------------------------------------------------------------------------------------------------------------------------------|--|
| <p>Debrief and support for families; patient and family advised of side effects and appearance of patient during procedure, including disinhibition after midazolam, atonal breathing, colour change.</p> |  |
|                                                                                                                                                                                                           |  |
|                                                                                                                                                                                                           |  |

For peer review only

1  
2  
3  
4  
5  
6  
7  
8  
9  
10  
11  
12  
13  
14  
15  
16  
17  
18  
19  
20  
21  
22  
23  
24  
25  
26  
27  
28  
29  
30  
31  
32  
33  
34  
35  
36  
37  
38  
39  
40  
41  
42  
43  
44  
45  
46  
47  
48  
49  
50  
51  
52  
53  
54  
55  
56  
57  
58  
59  
60

|                                           |  |
|-------------------------------------------|--|
|                                           |  |
|                                           |  |
| Special requests and supports identified. |  |

For peer review only

1  
2  
3  
4  
5  
6  
7  
8  
9  
10  
11  
12  
13  
14  
15  
16  
17  
18  
19  
20  
21  
22  
23  
24  
25  
26  
27  
28  
29  
30  
31  
32  
33  
34  
35  
36  
37  
38  
39  
40  
41  
42  
43  
44  
45  
46  
47  
48  
49  
50  
51  
52  
53  
54  
55  
56  
57  
58  
59  
60

|                      |                                                                                                                                                                                                                                                                                                                                                                                                                                                                                                                                                                                                      |
|----------------------|------------------------------------------------------------------------------------------------------------------------------------------------------------------------------------------------------------------------------------------------------------------------------------------------------------------------------------------------------------------------------------------------------------------------------------------------------------------------------------------------------------------------------------------------------------------------------------------------------|
|                      |                                                                                                                                                                                                                                                                                                                                                                                                                                                                                                                                                                                                      |
|                      |                                                                                                                                                                                                                                                                                                                                                                                                                                                                                                                                                                                                      |
| <p>Not Specified</p> | <ul style="list-style-type: none"> <li>- Verification form signed by physician and pharmacist prior to procedure</li> <li>- Detailed checklist of all medications to be given in order, to be confirmed with initial from pharmacist and physician</li> <li>- 2 identical IV kits in sealed/tamperproof container must be available at start of procedure</li> <li>- If patient chooses oral protocol, IV protocol must be available for use in case of ineffectiveness, patient must have signed consent to this prior to procedure.</li> <li>- Charting of remaining unused medications</li> </ul> |

1  
2  
3  
4  
5  
6  
7  
8  
9  
10  
11  
12  
13  
14  
15  
16  
17  
18  
19  
20  
21  
22  
23  
24  
25  
26  
27  
28  
29  
30  
31  
32  
33  
34  
35  
36  
37  
38  
39  
40  
41  
42  
43  
44  
45  
46  
47  
48  
49  
50  
51  
52  
53  
54  
55  
56  
57  
58  
59  
60

|                                                                                       |                                                                                                                                                                                                                                                                                                                                                                                                                                                                               |
|---------------------------------------------------------------------------------------|-------------------------------------------------------------------------------------------------------------------------------------------------------------------------------------------------------------------------------------------------------------------------------------------------------------------------------------------------------------------------------------------------------------------------------------------------------------------------------|
| <p>Not Specified</p>                                                                  | <ul style="list-style-type: none"> <li>- Verification form signed by physician and pharmacist prior to procedure</li> <li>- Detailed checklist of all medications to be given in order, to be confirmed with initial from pharmacist and physician</li> <li>- If patient chooses oral protocol, IV protocol must be available for use in case of ineffectiveness, patient must have signed consent to this prior to procedure.</li> <li>- Additional quantities of</li> </ul> |
| <p>Who is going to be present to be discussed with patient and family/caregivers.</p> |                                                                                                                                                                                                                                                                                                                                                                                                                                                                               |
|                                                                                       |                                                                                                                                                                                                                                                                                                                                                                                                                                                                               |

For peer review only

1  
2  
3  
4  
5  
6  
7  
8  
9  
10  
11  
12  
13  
14  
15  
16  
17  
18  
19  
20  
21  
22  
23  
24  
25  
26  
27  
28  
29  
30  
31  
32  
33  
34  
35  
36  
37  
38  
39  
40  
41  
42  
43  
44  
45  
46  
47  
48  
49  
50  
51  
52  
53  
54  
55  
56  
57  
58  
59  
60

|  |  |
|--|--|
|  |  |
|  |  |

For peer review only

1  
2  
3  
4  
5  
6  
7  
8  
9  
10  
11  
12  
13  
14  
15  
16  
17  
18  
19  
20  
21  
22  
23  
24  
25  
26  
27  
28  
29  
30  
31  
32  
33  
34  
35  
36  
37  
38  
39  
40  
41  
42  
43  
44  
45  
46  
47  
48  
49  
50  
51  
52  
53  
54  
55  
56  
57  
58  
59  
60

|               |               |
|---------------|---------------|
| Not Specified | Not specified |
| Not Specified | Not specified |
| Not specified | Not specified |

For peer review only



1  
2  
3  
4  
5  
6  
7  
8  
9  
10  
11  
12  
13  
14  
15  
16  
17  
18  
19  
20  
21  
22  
23  
24  
25  
26  
27  
28  
29  
30  
31  
32  
33  
34  
35  
36  
37  
38  
39  
40  
41  
42  
43  
44  
45  
46  
47  
48  
49  
50  
51  
52  
53  
54  
55  
56  
57  
58  
59  
60

|               |               |
|---------------|---------------|
| Not Specified | Not specified |
| Not Specified | Not specified |

For peer review only

1  
2  
3  
4  
5  
6  
7  
8  
9  
10  
11  
12  
13  
14  
15  
16  
17  
18  
19  
20  
21  
22  
23  
24  
25  
26  
27  
28  
29  
30  
31  
32  
33  
34  
35  
36  
37  
38  
39  
40  
41  
42  
43  
44  
45  
46  
47  
48  
49  
50  
51  
52  
53  
54  
55  
56  
57  
58  
59  
60

|               |               |
|---------------|---------------|
| Not Specified | Not specified |
| Not Specified | Not specified |
| Not Specified | Not specified |

For peer review only

1  
2  
3  
4  
5  
6  
7  
8  
9  
10  
11  
12  
13  
14  
15  
16  
17  
18  
19  
20  
21  
22  
23  
24  
25  
26  
27  
28  
29  
30  
31  
32  
33  
34  
35  
36  
37  
38  
39  
40  
41  
42  
43  
44  
45  
46  
47  
48  
49  
50  
51  
52  
53  
54  
55  
56  
57  
58  
59  
60

|                                                                 |                                                                                                                                                                                                                           |
|-----------------------------------------------------------------|---------------------------------------------------------------------------------------------------------------------------------------------------------------------------------------------------------------------------|
| <p>May obtain drug from pharmacy on behalf of family-member</p> | <p>Patient instructed that if they decide not to end their life after ingesting medication, to contact emergency medical services. Patients informed of appropriate disposal methods in case medication is not taken.</p> |
|                                                                 |                                                                                                                                                                                                                           |

For peer review only

1  
2  
3  
4  
5  
6  
7  
8  
9  
10  
11  
12  
13  
14  
15  
16  
17  
18  
19  
20  
21  
22  
23  
24  
25  
26  
27  
28  
29  
30  
31  
32  
33  
34  
35  
36  
37  
38  
39  
40  
41  
42  
43  
44  
45  
46  
47  
48  
49  
50  
51  
52  
53  
54  
55  
56  
57  
58  
59  
60

|                                                 |                      |
|-------------------------------------------------|----------------------|
| <p>Not Specified</p>                            | <p>Not specified</p> |
| <p>Possibly participate in decision-making.</p> | <p>Not specified</p> |

For peer review only

1  
2  
3  
4  
5  
6  
7  
8  
9  
10  
11  
12  
13  
14  
15  
16  
17  
18  
19  
20  
21  
22  
23  
24  
25  
26  
27  
28  
29  
30  
31  
32  
33  
34  
35  
36  
37  
38  
39  
40  
41  
42  
43  
44  
45  
46  
47  
48  
49  
50  
51  
52  
53  
54  
55  
56  
57  
58  
59  
60

|               |               |
|---------------|---------------|
| Not Specified | Not specified |
| Not Specified | Not specified |
|               |               |

For peer review only

1  
2  
3  
4  
5  
6  
7  
8  
9  
10  
11  
12  
13  
14  
15  
16  
17  
18  
19  
20  
21  
22  
23  
24  
25  
26  
27  
28  
29  
30  
31  
32  
33  
34  
35  
36  
37  
38  
39  
40  
41  
42  
43  
44  
45  
46  
47  
48  
49  
50  
51  
52  
53  
54  
55  
56  
57  
58  
59  
60

|                      |                                                                                                                                                                                                                                                                              |
|----------------------|------------------------------------------------------------------------------------------------------------------------------------------------------------------------------------------------------------------------------------------------------------------------------|
| <p>Not Specified</p> | <ul style="list-style-type: none"> <li>- patient receives document providing instructions an terms and conditions for informed consent</li> <li>- Patient practices correct placement of mask</li> <li>- patient must confirm they are confident with the process</li> </ul> |
| <p>Not Specified</p> | <p>Not specified</p>                                                                                                                                                                                                                                                         |
| <p>Not Specified</p> | <p>Not specified</p>                                                                                                                                                                                                                                                         |

For peer review only

1  
2  
3  
4  
5  
6  
7  
8  
9  
10  
11  
12  
13  
14  
15  
16  
17  
18  
19  
20  
21  
22  
23  
24  
25  
26  
27  
28  
29  
30  
31  
32  
33  
34  
35  
36  
37  
38  
39  
40  
41  
42  
43  
44  
45  
46  
47  
48  
49  
50  
51  
52  
53  
54  
55  
56  
57  
58  
59  
60

|               |               |
|---------------|---------------|
|               |               |
| Not Specified | Not specified |

For peer review only

1  
2  
3  
4  
5  
6  
7  
8  
9  
10  
11  
12  
13  
14  
15  
16  
17  
18  
19  
20  
21  
22  
23  
24  
25  
26  
27  
28  
29  
30  
31  
32  
33  
34  
35  
36  
37  
38  
39  
40  
41  
42  
43  
44  
45  
46  
47  
48  
49  
50  
51  
52  
53  
54  
55  
56  
57  
58  
59  
60

|  |                                                                                                                                                                                                                                                                                                                                                                                                                                                                                                                                                                                                                                                                                                                                                              |
|--|--------------------------------------------------------------------------------------------------------------------------------------------------------------------------------------------------------------------------------------------------------------------------------------------------------------------------------------------------------------------------------------------------------------------------------------------------------------------------------------------------------------------------------------------------------------------------------------------------------------------------------------------------------------------------------------------------------------------------------------------------------------|
|  | <p>If the attending or consulting physician (or the psychiatrist or psychologist, if a referral is made) determines that a patient does not meet the qualifications to receive a prescription for medication under chapter 70.245 RCW, no forms have to be submitted to the department. Within 30 days of dispensing medication, the dispensing pharmacist must file a Pharmacy Dispensing Record Form. Within 30 days of a qualified patient's death from ingestion of a lethal dose of medication obtained under the act, or death from any cause, the attending physician must file an Attending Physician After Death Reporting Form. To receive the immunity protection provided by chapter 70.245 RCW, physicians and pharmacists must make a good</p> |
|  | <p>As for medications</p>                                                                                                                                                                                                                                                                                                                                                                                                                                                                                                                                                                                                                                                                                                                                    |

For peer review only



1  
2  
3  
4  
5  
6  
7  
8  
9  
10  
11  
12  
13  
14  
15  
16  
17  
18  
19  
20  
21  
22  
23  
24  
25  
26  
27  
28  
29  
30  
31  
32  
33  
34  
35  
36  
37  
38  
39  
40  
41  
42  
43  
44  
45  
46  
47  
48  
49  
50  
51  
52  
53  
54  
55  
56  
57  
58  
59  
60

|               |               |
|---------------|---------------|
| Not Specified | Not specified |
|---------------|---------------|

For peer review only

1  
2  
3  
4  
5  
6  
7  
8  
9  
10  
11  
12  
13  
14  
15  
16  
17  
18  
19  
20  
21  
22  
23  
24  
25  
26  
27  
28  
29  
30  
31  
32  
33  
34  
35  
36  
37  
38  
39  
40  
41  
42  
43  
44  
45  
46  
47  
48  
49  
50  
51  
52  
53  
54  
55  
56  
57  
58  
59  
60

|               |               |
|---------------|---------------|
| Not Specified | Not specified |
|---------------|---------------|

For peer review only

1  
2  
3  
4  
5  
6  
7  
8  
9  
10  
11  
12  
13  
14  
15  
16  
17  
18  
19  
20  
21  
22  
23  
24  
25  
26  
27  
28  
29  
30  
31  
32  
33  
34  
35  
36  
37  
38  
39  
40  
41  
42  
43  
44  
45  
46  
47  
48  
49  
50  
51  
52  
53  
54  
55  
56  
57  
58  
59  
60

|  |  |
|--|--|
|  |  |
|--|--|

For peer review only

1  
2  
3  
4  
5  
6  
7  
8  
9  
10  
11  
12  
13  
14  
15  
16  
17  
18  
19  
20  
21  
22  
23  
24  
25  
26  
27  
28  
29  
30  
31  
32  
33  
34  
35  
36  
37  
38  
39  
40  
41  
42  
43  
44  
45  
46  
47  
48  
49  
50  
51  
52  
53  
54  
55  
56  
57  
58  
59  
60

| <b>Outcomes</b>                         |                                                      |
|-----------------------------------------|------------------------------------------------------|
| <b><i>Complications - Technical</i></b> | <b><i>Complications— Patient/Family Distress</i></b> |
|                                         |                                                      |
|                                         |                                                      |
|                                         |                                                      |

For peer review only

1  
2  
3  
4  
5  
6  
7  
8  
9  
10  
11  
12  
13  
14  
15  
16  
17  
18  
19  
20  
21  
22  
23  
24  
25  
26  
27  
28  
29  
30  
31  
32  
33  
34  
35  
36  
37  
38  
39  
40  
41  
42  
43  
44  
45  
46  
47  
48  
49  
50  
51  
52  
53  
54  
55  
56  
57  
58  
59  
60

|  |  |
|--|--|
|  |  |
|  |  |

For peer review only

1  
2  
3  
4  
5  
6  
7  
8  
9  
10  
11  
12  
13  
14  
15  
16  
17  
18  
19  
20  
21  
22  
23  
24  
25  
26  
27  
28  
29  
30  
31  
32  
33  
34  
35  
36  
37  
38  
39  
40  
41  
42  
43  
44  
45  
46  
47  
48  
49  
50  
51  
52  
53  
54  
55  
56  
57  
58  
59  
60

|  |                                                                                                                                                                                                                                                                                                                                                                          |
|--|--------------------------------------------------------------------------------------------------------------------------------------------------------------------------------------------------------------------------------------------------------------------------------------------------------------------------------------------------------------------------|
|  | Information on 23 persons who received prescriptions for lethal medications in 1998 under the Death with Dignity Act was reported to the Oregon Health Division. Of the 23, 15 died after taking their lethal medications, 6 died from their underlying illnesses, and 2 were alive as of January 1, 1999. No complications, such as vomiting or seizures, were reported |
|  |                                                                                                                                                                                                                                                                                                                                                                          |
|  |                                                                                                                                                                                                                                                                                                                                                                          |

1  
2  
3  
4  
5  
6  
7  
8  
9  
10  
11  
12  
13  
14  
15  
16  
17  
18  
19  
20  
21  
22  
23  
24  
25  
26  
27  
28  
29  
30  
31  
32  
33  
34  
35  
36  
37  
38  
39  
40  
41  
42  
43  
44  
45  
46  
47  
48  
49  
50  
51  
52  
53  
54  
55  
56  
57  
58  
59  
60

|  |  |
|--|--|
|  |  |
|  |  |

For peer review only

|                                                                                                                                                                                                                                                                                                                                                                                                                                                                                                                                        |                                                                         |
|----------------------------------------------------------------------------------------------------------------------------------------------------------------------------------------------------------------------------------------------------------------------------------------------------------------------------------------------------------------------------------------------------------------------------------------------------------------------------------------------------------------------------------------|-------------------------------------------------------------------------|
| <p>1<br/>2<br/>3<br/>4<br/>5<br/>6<br/>7<br/>8<br/>9<br/>10<br/>11<br/>12<br/>13<br/>14<br/>15<br/>16<br/>17<br/>18<br/>19<br/>20<br/>21</p> <p>The most common technical problems were problems with finding a blood vessel or problems with the intake of oral drugs. Oral or rectal administration of the agents was significantly more frequently associated with technical problems (<math>p = 0.003</math>) and with difficulties in achieving the desired effect (<math>p &lt; 0.001</math>) than parenteral administration</p> | <p>unwanted effects' included spasm, myoclonus, nausea or vomiting.</p> |
| <p>22<br/>23<br/>24<br/>25<br/>26<br/>27<br/>28<br/>29<br/>30<br/>31<br/>32<br/>33<br/>34<br/>35<br/>36<br/>37<br/>38<br/>39<br/>40<br/>41<br/>42<br/>43<br/>44<br/>45<br/>46<br/>47<br/>48<br/>49<br/>50<br/>51<br/>52<br/>53<br/>54<br/>55<br/>56<br/>57<br/>58<br/>59<br/>60</p>                                                                                                                                                                                                                                                    |                                                                         |



1  
2  
3  
4  
5  
6  
7  
8  
9  
10  
11  
12  
13  
14  
15  
16  
17  
18  
19  
20  
21  
22  
23  
24  
25  
26  
27  
28  
29  
30  
31  
32  
33  
34  
35  
36  
37  
38  
39  
40  
41  
42  
43  
44  
45  
46  
47  
48  
49  
50  
51  
52  
53  
54  
55  
56  
57  
58  
59  
60

|                                                |                                                                                      |
|------------------------------------------------|--------------------------------------------------------------------------------------|
|                                                |                                                                                      |
| One patient died a day after taking medication | When patient died one day after taking medication, caused distress on part of family |

For peer review only

1  
2  
3  
4  
5  
6  
7  
8  
9  
10  
11  
12  
13  
14  
15  
16  
17  
18  
19  
20  
21  
22  
23  
24  
25  
26  
27  
28  
29  
30  
31  
32  
33  
34  
35  
36  
37  
38  
39  
40  
41  
42  
43  
44  
45  
46  
47  
48  
49  
50  
51  
52  
53  
54  
55  
56  
57  
58  
59  
60

|                                                                                                                    |  |
|--------------------------------------------------------------------------------------------------------------------|--|
| <p>Sometimes less appropriate drugs were used, dosages were too low or they were administered inappropriately.</p> |  |
|                                                                                                                    |  |
|                                                                                                                    |  |
|                                                                                                                    |  |

For peer review only

1  
2  
3  
4  
5  
6  
7  
8  
9  
10  
11  
12  
13  
14  
15  
16  
17  
18  
19  
20  
21  
22  
23  
24  
25  
26  
27  
28  
29  
30  
31  
32  
33  
34  
35  
36  
37  
38  
39  
40  
41  
42  
43  
44  
45  
46  
47  
48  
49  
50  
51  
52  
53  
54  
55  
56  
57  
58  
59  
60

|  |  |
|--|--|
|  |  |
|  |  |

For peer review only

1  
2  
3  
4  
5  
6  
7  
8  
9  
10  
11  
12  
13  
14  
15  
16  
17  
18  
19  
20  
21  
22  
23  
24  
25  
26  
27  
28  
29  
30  
31  
32  
33  
34  
35  
36  
37  
38  
39  
40  
41  
42  
43  
44  
45  
46  
47  
48  
49  
50  
51  
52  
53  
54  
55  
56  
57  
58  
59  
60

|                                                                                                  |  |
|--------------------------------------------------------------------------------------------------|--|
|                                                                                                  |  |
|                                                                                                  |  |
| regurgitation, extension of dying process, variations between time from unconsciousness to death |  |

For peer review only



1  
2  
3  
4  
5  
6  
7  
8  
9  
10  
11  
12  
13  
14  
15  
16  
17  
18  
19  
20  
21  
22  
23  
24  
25  
26  
27  
28  
29  
30  
31  
32  
33  
34  
35  
36  
37  
38  
39  
40  
41  
42  
43  
44  
45  
46  
47  
48  
49  
50  
51  
52  
53  
54  
55  
56  
57  
58  
59  
60

|  |                                                                         |
|--|-------------------------------------------------------------------------|
|  |                                                                         |
|  |                                                                         |
|  | "no records of serious complications or cases of reawakening from coma" |
|  |                                                                         |

For peer review only

1  
2  
3  
4  
5  
6  
7  
8  
9  
10  
11  
12  
13  
14  
15  
16  
17  
18  
19  
20  
21  
22  
23  
24  
25  
26  
27  
28  
29  
30  
31  
32  
33  
34  
35  
36  
37  
38  
39  
40  
41  
42  
43  
44  
45  
46  
47  
48  
49  
50  
51  
52  
53  
54  
55  
56  
57  
58  
59  
60

|  |                                                                 |
|--|-----------------------------------------------------------------|
|  |                                                                 |
|  | We found that in 15% of PAS attempts the patient failed to die. |

For peer review only

|               |                                                                                                                                                                                                                                                                                                                                  |
|---------------|----------------------------------------------------------------------------------------------------------------------------------------------------------------------------------------------------------------------------------------------------------------------------------------------------------------------------------|
|               | <p>Two aid-in-dying family members met study criteria for prolonged grief disorder and one in 10 had major depressive disorder (Table 4). Perceived social support was high. Over onethird had accessed some form of mental health treatment since the death and 15% had availed themselves of hospice bereavement services.</p> |
|               |                                                                                                                                                                                                                                                                                                                                  |
| Not specified | Vomiting (3%), Seizures (0)                                                                                                                                                                                                                                                                                                      |
|               | <p>One patient vomited after ingesting the medication and died 25 hours later; another patient lived for 37 hours after ingesting the medication.</p>                                                                                                                                                                            |





1  
2  
3  
4  
5  
6  
7  
8  
9  
10  
11  
12  
13  
14  
15  
16  
17  
18  
19  
20  
21  
22  
23  
24  
25  
26  
27  
28  
29  
30  
31  
32  
33  
34  
35  
36  
37  
38  
39  
40  
41  
42  
43  
44  
45  
46  
47  
48  
49  
50  
51  
52  
53  
54  
55  
56  
57  
58  
59  
60

|                                                                                                                                                                                                                                                                                               |                                                                                                                                          |
|-----------------------------------------------------------------------------------------------------------------------------------------------------------------------------------------------------------------------------------------------------------------------------------------------|------------------------------------------------------------------------------------------------------------------------------------------|
|                                                                                                                                                                                                                                                                                               |                                                                                                                                          |
| <p>In 3% of the cases the GPs reported complications or unintended effects. The GPs stated that in 19% of the cases death occurred too rapidly. Only 'death occurred sooner than expected' and 'problems in finding an appropriate blood-vessel' were mentioned more often in this study.</p> | <p>In 12% of the cases there were complications such as myoclonus or cyanosis, the drug not leading to death or doing so too slowly.</p> |
|                                                                                                                                                                                                                                                                                               |                                                                                                                                          |



1  
2  
3  
4  
5  
6  
7  
8  
9  
10  
11  
12  
13  
14  
15  
16  
17  
18  
19  
20  
21  
22  
23  
24  
25  
26  
27  
28  
29  
30  
31  
32  
33  
34  
35  
36  
37  
38  
39  
40  
41  
42  
43  
44  
45  
46  
47  
48  
49  
50  
51  
52  
53  
54  
55  
56  
57  
58  
59  
60

|  |  |
|--|--|
|  |  |
|  |  |

For peer review only

|                                                                                                                                                                                                                                                                                                                                                                                                                                                                                                                                                                                                                                           |                                                                                                                                                                                                                                                                                                       |
|-------------------------------------------------------------------------------------------------------------------------------------------------------------------------------------------------------------------------------------------------------------------------------------------------------------------------------------------------------------------------------------------------------------------------------------------------------------------------------------------------------------------------------------------------------------------------------------------------------------------------------------------|-------------------------------------------------------------------------------------------------------------------------------------------------------------------------------------------------------------------------------------------------------------------------------------------------------|
|                                                                                                                                                                                                                                                                                                                                                                                                                                                                                                                                                                                                                                           |                                                                                                                                                                                                                                                                                                       |
|                                                                                                                                                                                                                                                                                                                                                                                                                                                                                                                                                                                                                                           |                                                                                                                                                                                                                                                                                                       |
| <p>Complications or unintended effects were reported in 12 of the patients. In 6 of the patients, the drug did not lead to death or did too slowly; Table 5 shows that this occurred almost exclusively with the use of opioids and brallobarbital combination preparations. In 2, the drug resulted in insufficient or slow to a comatose state (for example, at 10 and 60 mg diazepam intravenously, 100 mg morphine intravenously and 10 tablets brallobarbital combination preparation). In 2, the effect was unexpectedly (too) rapid (for example, in a patient who would be brought into a coma with thiopental intravenously,</p> | <p>One percent of the patients choked on ingestion or vomited the drug (barbiturates), sometimes despite the administration of anti-emetics. In 1, undesirable side effects or side effects occurred (such as myoclonus after diazepam intravenously, extreme cyanosis with alcuronium infusion).</p> |

|  |                                                                                                                                                                                                                                                                                  |
|--|----------------------------------------------------------------------------------------------------------------------------------------------------------------------------------------------------------------------------------------------------------------------------------|
|  |                                                                                                                                                                                                                                                                                  |
|  | <p>The most frequently mentioned problem in the different studies was that death occurred either not at all, or later or sooner than expected. In the 1992 general practitioners study, this happened most frequently when opioids or brallobarbital combinations were used.</p> |

1  
2  
3  
4  
5  
6  
7  
8  
9  
10  
11  
12  
13  
14  
15  
16  
17  
18  
19  
20  
21  
22  
23  
24  
25  
26  
27  
28  
29  
30  
31  
32  
33  
34  
35  
36  
37  
38  
39  
40  
41  
42  
43  
44  
45  
46  
47  
48  
49  
50  
51  
52  
53  
54  
55  
56  
57  
58  
59  
60

|  |                                                                                                                           |
|--|---------------------------------------------------------------------------------------------------------------------------|
|  | <p>Private family room is available afterwards where relatives can wait until procedure has ended.</p>                    |
|  |                                                                                                                           |
|  | <p>Vomiting was unusual (24 patients, 2.4%). Six patients awakened, giving the medications an efficacy rate of 99.4%.</p> |

For peer review only

1  
2  
3  
4  
5  
6  
7  
8  
9  
10  
11  
12  
13  
14  
15  
16  
17  
18  
19  
20  
21  
22  
23  
24  
25  
26  
27  
28  
29  
30  
31  
32  
33  
34  
35  
36  
37  
38  
39  
40  
41  
42  
43  
44  
45  
46  
47  
48  
49  
50  
51  
52  
53  
54  
55  
56  
57  
58  
59  
60

|  |  |
|--|--|
|  |  |
|  |  |

For peer review only



1  
2  
3  
4  
5  
6  
7  
8  
9  
10  
11  
12  
13  
14  
15  
16  
17  
18  
19  
20  
21  
22  
23  
24  
25  
26  
27  
28  
29  
30  
31  
32  
33  
34  
35  
36  
37  
38  
39  
40  
41  
42  
43  
44  
45  
46  
47  
48  
49  
50  
51  
52  
53  
54  
55  
56  
57  
58  
59  
60

|  |                                                                                                                                                          |
|--|----------------------------------------------------------------------------------------------------------------------------------------------------------|
|  |                                                                                                                                                          |
|  | <p>In approximately 1 of every 20 PAD deaths, a postingestion complication has occurred, primarily the regurgitation of the medicine by the patient.</p> |

For peer review only

|  |                                                                                                                                                                                                                                                                                                                                                                                                                                                                                                                                                                                                                    |
|--|--------------------------------------------------------------------------------------------------------------------------------------------------------------------------------------------------------------------------------------------------------------------------------------------------------------------------------------------------------------------------------------------------------------------------------------------------------------------------------------------------------------------------------------------------------------------------------------------------------------------|
|  |                                                                                                                                                                                                                                                                                                                                                                                                                                                                                                                                                                                                                    |
|  | <p>Of the twenty-three that received legal drugs to end their lives, fifteen had actually used the drugs and died; six others had died from their illnesses, and two were still alive as of January 1, 1999. According to the report, thirty-three prescriptions were written in 1999 for lethal doses of medication, and twenty-seven died after using this medication; twenty-six of these patients obtained their prescription in 1999 (nine per 10,000 deaths in Oregon) and one in 1998. Five of the 1999 prescription recipients died of their underlying illness and two were alive at the end of 1999.</p> |

|                                                                                                                                                                                                                                                                                                                                                                                                                                                                                                                                                                                                               |  |
|---------------------------------------------------------------------------------------------------------------------------------------------------------------------------------------------------------------------------------------------------------------------------------------------------------------------------------------------------------------------------------------------------------------------------------------------------------------------------------------------------------------------------------------------------------------------------------------------------------------|--|
|                                                                                                                                                                                                                                                                                                                                                                                                                                                                                                                                                                                                               |  |
| <p>Complications were reported for 20 patients. Of these, 19 involved regurgitation and none involved seizures. The median time between ingestion and unconsciousness was 5 minutes with a range of 1 to 38 minutes. The median time between ingestion and death was 25 minutes with a range of 1 minute to 48 hours. One patient (2007) lived 3 ½ days and one (2005) regained consciousness after ingesting the lethal dose of medication and then died 14 days later from his illness rather than from the medication. Emergency medical services were called for 4 patients, 3 to pronounce death and</p> |  |
|                                                                                                                                                                                                                                                                                                                                                                                                                                                                                                                                                                                                               |  |

1  
2  
3  
4  
5  
6  
7  
8  
9  
10  
11  
12  
13  
14  
15  
16  
17  
18  
19  
20  
21  
22  
23  
24  
25  
26  
27  
28  
29  
30  
31  
32  
33  
34  
35  
36  
37  
38  
39  
40  
41  
42  
43  
44  
45  
46  
47  
48  
49  
50  
51  
52  
53  
54  
55  
56  
57  
58  
59  
60

|                                                                                                                                                                                                                                                            |  |
|------------------------------------------------------------------------------------------------------------------------------------------------------------------------------------------------------------------------------------------------------------|--|
| <p>Emanuel et al reported that in 15% of cases PAS failed; that is, patients were given a prescription or attempted suicide, but did not die. Ganzini et al recently reported that there had been no failed PAS attempts in Oregon since legalization.</p> |  |
|                                                                                                                                                                                                                                                            |  |
|                                                                                                                                                                                                                                                            |  |
|                                                                                                                                                                                                                                                            |  |
|                                                                                                                                                                                                                                                            |  |

For peer review only

|                                                                                                                                                                                                                                                                                                                                                                                                                                                                                                                                                                                                                                                                                                                                                                                                                                                                  |  |
|------------------------------------------------------------------------------------------------------------------------------------------------------------------------------------------------------------------------------------------------------------------------------------------------------------------------------------------------------------------------------------------------------------------------------------------------------------------------------------------------------------------------------------------------------------------------------------------------------------------------------------------------------------------------------------------------------------------------------------------------------------------------------------------------------------------------------------------------------------------|--|
|                                                                                                                                                                                                                                                                                                                                                                                                                                                                                                                                                                                                                                                                                                                                                                                                                                                                  |  |
| <p>1<br/>2<br/>3<br/>4<br/>5<br/>6<br/>7<br/>8<br/>9<br/>10<br/>11<br/>12<br/>13<br/>14<br/>15<br/>16<br/>17<br/>18<br/>19<br/>20<br/>21<br/>22<br/>23<br/>24<br/>25<br/>26<br/>27<br/>28<br/>29<br/>30<br/>31<br/>32<br/>33<br/>34<br/>35<br/>36<br/>37<br/>38<br/>39<br/>40<br/>41<br/>42<br/>43<br/>44<br/>45<br/>46<br/>47<br/>48<br/>49<br/>50<br/>51<br/>52<br/>53<br/>54<br/>55<br/>56<br/>57<br/>58<br/>59<br/>60</p> <p>Complications after the lethal drugs were ingested were reported in 17 cases (16 patients experienced 'regurgitation' and one patient awakened after taking the lethal medication). No complications were reported in 1998 or 1999. The highest number of complications occurred in 2006 (four cases). Ninety-four per cent of the PAS deaths were reportedly without complication, with seven cases reported as 'unknown'.</p> |  |

|                                                                                                                                                                                                                                                                                                                                                                                                                                                                                                                                                                                                                                                                                                                                                                                                                               |                                                                                                                                                                           |
|-------------------------------------------------------------------------------------------------------------------------------------------------------------------------------------------------------------------------------------------------------------------------------------------------------------------------------------------------------------------------------------------------------------------------------------------------------------------------------------------------------------------------------------------------------------------------------------------------------------------------------------------------------------------------------------------------------------------------------------------------------------------------------------------------------------------------------|---------------------------------------------------------------------------------------------------------------------------------------------------------------------------|
| <p>1<br/>2<br/>3<br/>4<br/>5<br/>6<br/>7<br/>8<br/>9<br/>10<br/>11<br/>12<br/>13<br/>14<br/>15<br/>16<br/>17<br/>18<br/>19<br/>20<br/>21<br/>22<br/>23<br/>24<br/>25<br/>26<br/>27<br/>28<br/>29<br/>30<br/>31<br/>32<br/>33<br/>34<br/>35<br/>36<br/>37<br/>38<br/>39<br/>40<br/>41<br/>42<br/>43<br/>44<br/>45<br/>46<br/>47<br/>48<br/>49<br/>50<br/>51<br/>52<br/>53<br/>54<br/>55<br/>56<br/>57<br/>58<br/>59<br/>60</p> <p>Problems that can occur when using euthanatic agents: difficulty in intravenous injection, too large dissolution volume for the thiopental, precipitation in the injection, too short a lapse of time between intravenous injection and suffering, bad taste of the euthanasia drink, too much volume of the drink, and too long a lapse of time between taking the drink and the death.</p> | <p>The duration of suffering varied in the parenteral method between 0 and 30min, in the oral method between 8 min and 7 hours. 2 episodes of vomiting were reported.</p> |
|                                                                                                                                                                                                                                                                                                                                                                                                                                                                                                                                                                                                                                                                                                                                                                                                                               |                                                                                                                                                                           |

|                                                                                                                                                                                                                                                                                                                                                                                                                                                                                                                                                                                                                                          |                                                                                  |
|------------------------------------------------------------------------------------------------------------------------------------------------------------------------------------------------------------------------------------------------------------------------------------------------------------------------------------------------------------------------------------------------------------------------------------------------------------------------------------------------------------------------------------------------------------------------------------------------------------------------------------------|----------------------------------------------------------------------------------|
|                                                                                                                                                                                                                                                                                                                                                                                                                                                                                                                                                                                                                                          |                                                                                  |
| <p>In 20% of the patients who received a barbiturate, a muscular relaxant was needed to end life after the 5 hour time period. With parenteral administration, contrary to the advice, benzodiazepines or other medications were used to induce coma in 23.3% of cases, usually resulting in the need for repeated and higher doses and sometimes resulting in reawakening with the need for a second attempt. Rectal application, used in 5 cases, led to death for 2 patients within three hours, in the other 3 cases administration of muscle relaxants was required up to five hours after administering the suppositories with</p> | <p>Two patients who did not receive the antiemetic vomited the deadly drugs.</p> |

1  
2  
3  
4  
5  
6  
7  
8  
9  
10  
11  
12  
13  
14  
15  
16  
17  
18  
19  
20  
21  
22  
23  
24  
25  
26  
27  
28  
29  
30  
31  
32  
33  
34  
35  
36  
37  
38  
39  
40  
41  
42  
43  
44  
45  
46  
47  
48  
49  
50  
51  
52  
53  
54  
55  
56  
57  
58  
59  
60

|                                                                                                                                                                                                                                                                                                                                                                                                                                                                                                                                                                                                                                                                                                  |                                                                                                                                                                                                                                                                                                                                                                                                                                                                                                                                                                                                                                                                                                                                                                             |
|--------------------------------------------------------------------------------------------------------------------------------------------------------------------------------------------------------------------------------------------------------------------------------------------------------------------------------------------------------------------------------------------------------------------------------------------------------------------------------------------------------------------------------------------------------------------------------------------------------------------------------------------------------------------------------------------------|-----------------------------------------------------------------------------------------------------------------------------------------------------------------------------------------------------------------------------------------------------------------------------------------------------------------------------------------------------------------------------------------------------------------------------------------------------------------------------------------------------------------------------------------------------------------------------------------------------------------------------------------------------------------------------------------------------------------------------------------------------------------------------|
|                                                                                                                                                                                                                                                                                                                                                                                                                                                                                                                                                                                                                                                                                                  |                                                                                                                                                                                                                                                                                                                                                                                                                                                                                                                                                                                                                                                                                                                                                                             |
| <p>- Thiopental preparation - a number of doctors found this very laborious and difficult. By adding water or NaCl, pressure rose in the bottle, making it hard to spray the liquid</p> <p>- Pancuronium storage - doctors worry about how long this can be stored outside the fridge</p> <p>- The use of 20 ml spout for thiopental has problems in practice to deliver because a lot of pressure is needed during the injection. It is therefore advisable to use 2 syringes of 10 ml use. Also the use of an extension syringe advised. This gives the doctor more freedom of movement to inject the euthanatics, causing it blood vessel is less forced</p> <p>- To minimize the risk of</p> | <p>- Pain in injecting - A number of doctors reported that the patient had pain after injection of thiopental. The cause is the high osmolality and pH of the high concentration of thiopental in the solution. This can be done by the patient experienced as painful. 6.7 That's why it has dissolving thiopental in too small volumes (&lt;15 ml) not preferred. Another cause of pain is thick needles. Recommend the use of a 23G needle.</p> <p>- Bad taste of pento or secobarbital</p> <p>- Drink volume too large - should limit to 75 mL</p> <p>- Time to death too long or unpredictable. In most patients time to death is less than 1 h but can sometimes take longer</p> <p>- difficult venipuncture - advisable to look 1 day before for accessible vein</p> |









1  
2  
3  
4  
5  
6  
7  
8  
9  
10  
11  
12  
13  
14  
15  
16  
17  
18  
19  
20  
21  
22  
23  
24  
25  
26  
27  
28  
29  
30  
31  
32  
33  
34  
35  
36  
37  
38  
39  
40  
41  
42  
43  
44  
45  
46  
47  
48  
49  
50  
51  
52  
53  
54  
55  
56  
57  
58  
59  
60

|  |  |
|--|--|
|  |  |
|  |  |

For peer review only

1  
2  
3  
4  
5  
6  
7  
8  
9  
10  
11  
12  
13  
14  
15  
16  
17  
18  
19  
20  
21  
22  
23  
24  
25  
26  
27  
28  
29  
30  
31  
32  
33  
34  
35  
36  
37  
38  
39  
40  
41  
42  
43  
44  
45  
46  
47  
48  
49  
50  
51  
52  
53  
54  
55  
56  
57  
58  
59  
60

|                                               |  |
|-----------------------------------------------|--|
| Cases often not reported to review committee. |  |
|                                               |  |

For peer review only

|                                                                                                                                                                                                                   |                                                                                                                                                                                                                                                                                                                 |
|-------------------------------------------------------------------------------------------------------------------------------------------------------------------------------------------------------------------|-----------------------------------------------------------------------------------------------------------------------------------------------------------------------------------------------------------------------------------------------------------------------------------------------------------------|
| 1<br>2 Patient may die directly<br>3 from thiopental<br>4 administration, before<br>5 receiving muscle relaxant<br>6<br>7<br>8<br>9<br>10<br>11<br>12<br>13<br>14<br>15<br>16<br>17<br>18<br>19<br>20<br>21<br>22 |                                                                                                                                                                                                                                                                                                                 |
|                                                                                                                                                                                                                   | 23 One case: Tensions rose due to difficulty<br>24 accepting the patient's wish to die.<br>25<br>26<br>27<br>28<br>29<br>30<br>31<br>32<br>33<br>34<br>35<br>36<br>37<br>38<br>39<br>40<br>41<br>42<br>43<br>44<br>45<br>46<br>47<br>48<br>49<br>50<br>51<br>52<br>53<br>54<br>55<br>56<br>57<br>58<br>59<br>60 |

1  
2  
3  
4  
5  
6  
7  
8  
9  
10  
11  
12  
13  
14  
15  
16  
17  
18  
19  
20  
21  
22  
23  
24  
25  
26  
27  
28  
29  
30  
31  
32  
33  
34  
35  
36  
37  
38  
39  
40  
41  
42  
43  
44  
45  
46  
47  
48  
49  
50  
51  
52  
53  
54  
55  
56  
57  
58  
59  
60

|  |  |
|--|--|
|  |  |
|  |  |

For peer review only

1  
2  
3  
4  
5  
6  
7  
8  
9  
10  
11  
12  
13  
14  
15  
16  
17  
18  
19  
20  
21  
22  
23  
24  
25  
26  
27  
28  
29  
30  
31  
32  
33  
34  
35  
36  
37  
38  
39  
40  
41  
42  
43  
44  
45  
46  
47  
48  
49  
50  
51  
52  
53  
54  
55  
56  
57  
58  
59  
60

|  |  |
|--|--|
|  |  |
|--|--|

For peer review only



1  
2  
3  
4  
5  
6  
7  
8  
9  
10  
11  
12  
13  
14  
15  
16  
17  
18  
19  
20  
21  
22  
23  
24  
25  
26  
27  
28  
29  
30  
31  
32  
33  
34  
35  
36  
37  
38  
39  
40  
41  
42  
43  
44  
45  
46  
47  
48  
49  
50  
51  
52  
53  
54  
55  
56  
57  
58  
59  
60

|  |  |
|--|--|
|  |  |
|--|--|

For peer review only

1  
2  
3  
4  
5  
6  
7  
8  
9  
10  
11  
12  
13  
14  
15  
16  
17  
18  
19  
20  
21  
22  
23  
24  
25  
26  
27  
28  
29  
30  
31  
32  
33  
34  
35  
36  
37  
38  
39  
40  
41  
42  
43  
44  
45  
46  
47  
48  
49  
50  
51  
52  
53  
54  
55  
56  
57  
58  
59  
60

|  |  |
|--|--|
|  |  |
|--|--|

For peer review only

1  
2  
3  
4  
5  
6  
7  
8  
9  
10  
11  
12  
13  
14  
15  
16  
17  
18  
19  
20  
21  
22  
23  
24  
25  
26  
27  
28  
29  
30  
31  
32  
33  
34  
35  
36  
37  
38  
39  
40  
41  
42  
43  
44  
45  
46  
47  
48  
49  
50  
51  
52  
53  
54  
55  
56  
57  
58  
59  
60

|  |  |
|--|--|
|  |  |
|  |  |
|  |  |

For peer review only

1  
2  
3  
4  
5  
6  
7  
8  
9  
10  
11  
12  
13  
14  
15  
16  
17  
18  
19  
20  
21  
22  
23  
24  
25  
26  
27  
28  
29  
30  
31  
32  
33  
34  
35  
36  
37  
38  
39  
40  
41  
42  
43  
44  
45  
46  
47  
48  
49  
50  
51  
52  
53  
54  
55  
56  
57  
58  
59  
60

|  |  |
|--|--|
|  |  |
|--|--|

For peer review only

1  
2  
3  
4  
5  
6  
7  
8  
9  
10  
11  
12  
13  
14  
15  
16  
17  
18  
19  
20  
21  
22  
23  
24  
25  
26  
27  
28  
29  
30  
31  
32  
33  
34  
35  
36  
37  
38  
39  
40  
41  
42  
43  
44  
45  
46  
47  
48  
49  
50  
51  
52  
53  
54  
55  
56  
57  
58  
59  
60

|  |  |
|--|--|
|  |  |
|  |  |

For peer review only

1  
2  
3  
4  
5  
6  
7  
8  
9  
10  
11  
12  
13  
14  
15  
16  
17  
18  
19  
20  
21  
22  
23  
24  
25  
26  
27  
28  
29  
30  
31  
32  
33  
34  
35  
36  
37  
38  
39  
40  
41  
42  
43  
44  
45  
46  
47  
48  
49  
50  
51  
52  
53  
54  
55  
56  
57  
58  
59  
60

|  |  |
|--|--|
|  |  |
|--|--|

For peer review only

1  
2  
3  
4  
5  
6  
7  
8  
9  
10  
11  
12  
13  
14  
15  
16  
17  
18  
19  
20  
21  
22  
23  
24  
25  
26  
27  
28  
29  
30  
31  
32  
33  
34  
35  
36  
37  
38  
39  
40  
41  
42  
43  
44  
45  
46  
47  
48  
49  
50  
51  
52  
53  
54  
55  
56  
57  
58  
59  
60

|  |  |
|--|--|
|  |  |
|  |  |
|  |  |

For peer review only

- 1
- 2
- 3
- 4
- 5
- 6
- 7
- 8
- 9
- 10
- 11
- 12
- 13
- 14
- 15
- 16
- 17
- 18
- 19
- 20
- 21
- 22
- 23
- 24
- 25
- 26
- 27
- 28
- 29
- 30
- 31
- 32
- 33
- 34
- 35
- 36
- 37
- 38
- 39
- 40
- 41
- 42
- 43
- 44
- 45
- 46
- 47
- 48
- 49
- 50
- 51
- 52
- 53
- 54
- 55
- 56
- 57
- 58
- 59
- 60

|  |  |
|--|--|
|  |  |
|  |  |
|  |  |

For peer review only







1  
2  
3  
4  
5  
6  
7  
8  
9  
10  
11  
12  
13  
14  
15  
16  
17  
18  
19  
20  
21  
22  
23  
24  
25  
26  
27  
28  
29  
30  
31  
32  
33  
34  
35  
36  
37  
38  
39  
40  
41  
42  
43  
44  
45  
46  
47  
48  
49  
50  
51  
52  
53  
54  
55  
56  
57  
58  
59  
60

|  |  |
|--|--|
|  |  |
|  |  |

For peer review only



1  
2  
3  
4  
5  
6  
7  
8  
9  
10  
11  
12  
13  
14  
15  
16  
17  
18  
19  
20  
21  
22  
23  
24  
25  
26  
27  
28  
29  
30  
31  
32  
33  
34  
35  
36  
37  
38  
39  
40  
41  
42  
43  
44  
45  
46  
47  
48  
49  
50  
51  
52  
53  
54  
55  
56  
57  
58  
59  
60

|  |  |
|--|--|
|  |  |
|  |  |

For peer review only

1  
2  
3  
4  
5  
6  
7  
8  
9  
10  
11  
12  
13  
14  
15  
16  
17  
18  
19  
20  
21  
22  
23  
24  
25  
26  
27  
28  
29  
30  
31  
32  
33  
34  
35  
36  
37  
38  
39  
40  
41  
42  
43  
44  
45  
46  
47  
48  
49  
50  
51  
52  
53  
54  
55  
56  
57  
58  
59  
60

|  |                                                                   |
|--|-------------------------------------------------------------------|
|  | Discomfort with the process of choosing a date and time for MAID. |
|  |                                                                   |
|  |                                                                   |

For peer review only

1  
2  
3  
4  
5  
6  
7  
8  
9  
10  
11  
12  
13  
14  
15  
16  
17  
18  
19  
20  
21  
22  
23  
24  
25  
26  
27  
28  
29  
30  
31  
32  
33  
34  
35  
36  
37  
38  
39  
40  
41  
42  
43  
44  
45  
46  
47  
48  
49  
50  
51  
52  
53  
54  
55  
56  
57  
58  
59  
60

|                                                                                                                                                                                                                                                                                                                                                                                                                             |  |
|-----------------------------------------------------------------------------------------------------------------------------------------------------------------------------------------------------------------------------------------------------------------------------------------------------------------------------------------------------------------------------------------------------------------------------|--|
|                                                                                                                                                                                                                                                                                                                                                                                                                             |  |
| <p>As of 2014, we are aware of 3 persons with well functioning GI tracts in over 700 patients, where the barbiturate failed to produce the expected result when the above regimen was followed. It is appropriate to discuss a back up plan with patient, family and the hospice team for sedation if necessary. We do not have useful information about cognition in 2 persons who awakened and lived for a few weeks.</p> |  |

For peer review only

|                                                                                                                                                                                                                                              |  |
|----------------------------------------------------------------------------------------------------------------------------------------------------------------------------------------------------------------------------------------------|--|
| 1<br>2 Ingesting medication but<br>3 not dying, partial emesis,<br>4 delayed dying after losing<br>5 consciousness<br>6<br>7<br>8<br>9<br>10<br>11<br>12<br>13<br>14<br>15<br>16<br>17<br>18<br>19<br>20                                     |  |
| 21<br>22<br>23<br>24<br>25<br>26<br>27<br>28<br>29<br>30<br>31<br>32<br>33<br>34<br>35<br>36<br>37<br>38<br>39<br>40<br>41<br>42<br>43<br>44<br>45<br>46<br>47<br>48<br>49<br>50<br>51<br>52<br>53<br>54<br>55<br>56<br>57<br>58<br>59<br>60 |  |





1  
2  
3  
4  
5  
6  
7  
8  
9  
10  
11  
12  
13  
14  
15  
16  
17  
18  
19  
20  
21  
22  
23  
24  
25  
26  
27  
28  
29  
30  
31  
32  
33  
34  
35  
36  
37  
38  
39  
40  
41  
42  
43  
44  
45  
46  
47  
48  
49  
50  
51  
52  
53  
54  
55  
56  
57  
58  
59  
60

|                                                                                                                                      |  |
|--------------------------------------------------------------------------------------------------------------------------------------|--|
| <p>Variability in fit of the mask, and gaps between the face and mask, which allowed room air to enter the breathing environment</p> |  |
|                                                                                                                                      |  |
|                                                                                                                                      |  |

For peer review only

1  
2  
3  
4  
5  
6  
7  
8  
9  
10  
11  
12  
13  
14  
15  
16  
17  
18  
19  
20  
21  
22  
23  
24  
25  
26  
27  
28  
29  
30  
31  
32  
33  
34  
35  
36  
37  
38  
39  
40  
41  
42  
43  
44  
45  
46  
47  
48  
49  
50  
51  
52  
53  
54  
55  
56  
57  
58  
59  
60

|  |                                                                                                                                                                                                                                                                                                                                                                                                                                                                             |
|--|-----------------------------------------------------------------------------------------------------------------------------------------------------------------------------------------------------------------------------------------------------------------------------------------------------------------------------------------------------------------------------------------------------------------------------------------------------------------------------|
|  | <p>The median interval between ingestion and unconsciousness was 10 minutes (range, 1 to 30), and the mean interval between ingestion and death was 30 minutes (range, 4 minutes to 26 hours). Twenty-four patients died within 4 hours. Three patients died after 11 hours or more. Two of these three patients ingested the entire dose of medicine; the other patient ingested two thirds of the dose, became unconscious after 13 minutes, and died 26 hours later.</p> |
|  |                                                                                                                                                                                                                                                                                                                                                                                                                                                                             |

1  
2  
3  
4  
5  
6  
7  
8  
9  
10  
11  
12  
13  
14  
15  
16  
17  
18  
19  
20  
21  
22  
23  
24  
25  
26  
27  
28  
29  
30  
31  
32  
33  
34  
35  
36  
37  
38  
39  
40  
41  
42  
43  
44  
45  
46  
47  
48  
49  
50  
51  
52  
53  
54  
55  
56  
57  
58  
59  
60

|                                                                                                                                             |  |
|---------------------------------------------------------------------------------------------------------------------------------------------|--|
| Regurgitation 1%; seizures 0%, awakened 0%; other 1%; none 90%; unknown 8%; EMS called to pronounce death 2% EMS not called 90%; unknown 9% |  |
|                                                                                                                                             |  |

For peer review only

1  
2  
3  
4  
5  
6  
7  
8  
9  
10  
11  
12  
13  
14  
15  
16  
17  
18  
19  
20  
21  
22  
23  
24  
25  
26  
27  
28  
29  
30  
31  
32  
33  
34  
35  
36  
37  
38  
39  
40  
41  
42  
43  
44  
45  
46  
47  
48  
49  
50  
51  
52  
53  
54  
55  
56  
57  
58  
59  
60

|  |  |
|--|--|
|  |  |
|--|--|

For peer review only

|                                                                                                                                                                                                                                                                                                                                                                                                                                                                                                                                                                                                                   |  |
|-------------------------------------------------------------------------------------------------------------------------------------------------------------------------------------------------------------------------------------------------------------------------------------------------------------------------------------------------------------------------------------------------------------------------------------------------------------------------------------------------------------------------------------------------------------------------------------------------------------------|--|
| <p>PAS:</p> <ul style="list-style-type: none"><li>-Difficulty swallowing oral medications (9.6% of cases)</li><li>- Vomiting or seizures - 8.8% of cases</li><li>- patients awake from coma - 1.8% of cases</li><li>- Death longer than anticipated or patient never became comatose - 12.3% of cases</li></ul> <p>Euthanasia:</p> <ul style="list-style-type: none"><li>- inability to find vein for injection - 4.5% of cases</li><li>- vomiting or myoclonus - 3.7%</li><li>- patients awoke from coma - 0.9%</li><li>- time of death longer than expected or patient did not become comatose - 4.3%</li></ul> |  |
|-------------------------------------------------------------------------------------------------------------------------------------------------------------------------------------------------------------------------------------------------------------------------------------------------------------------------------------------------------------------------------------------------------------------------------------------------------------------------------------------------------------------------------------------------------------------------------------------------------------------|--|

1  
2  
3  
4  
5  
6  
7  
8  
9  
10  
11  
12  
13  
14  
15  
16  
17  
18  
19  
20  
21  
22  
23  
24  
25  
26  
27  
28  
29  
30  
31  
32  
33  
34  
35  
36  
37  
38  
39  
40  
41  
42  
43  
44  
45  
46  
47  
48  
49  
50  
51  
52  
53  
54  
55  
56  
57  
58  
59  
60

|  |  |
|--|--|
|  |  |
|--|--|

For peer review only





1  
2  
3  
4  
5  
6  
7  
8  
9  
10  
11  
12  
13  
14  
15  
16  
17  
18  
19  
20  
21  
22  
23  
24  
25  
26  
27  
28  
29  
30  
31  
32  
33  
34  
35  
36  
37  
38  
39  
40  
41  
42  
43  
44  
45  
46  
47  
48  
49  
50  
51  
52  
53  
54  
55  
56  
57  
58  
59  
60

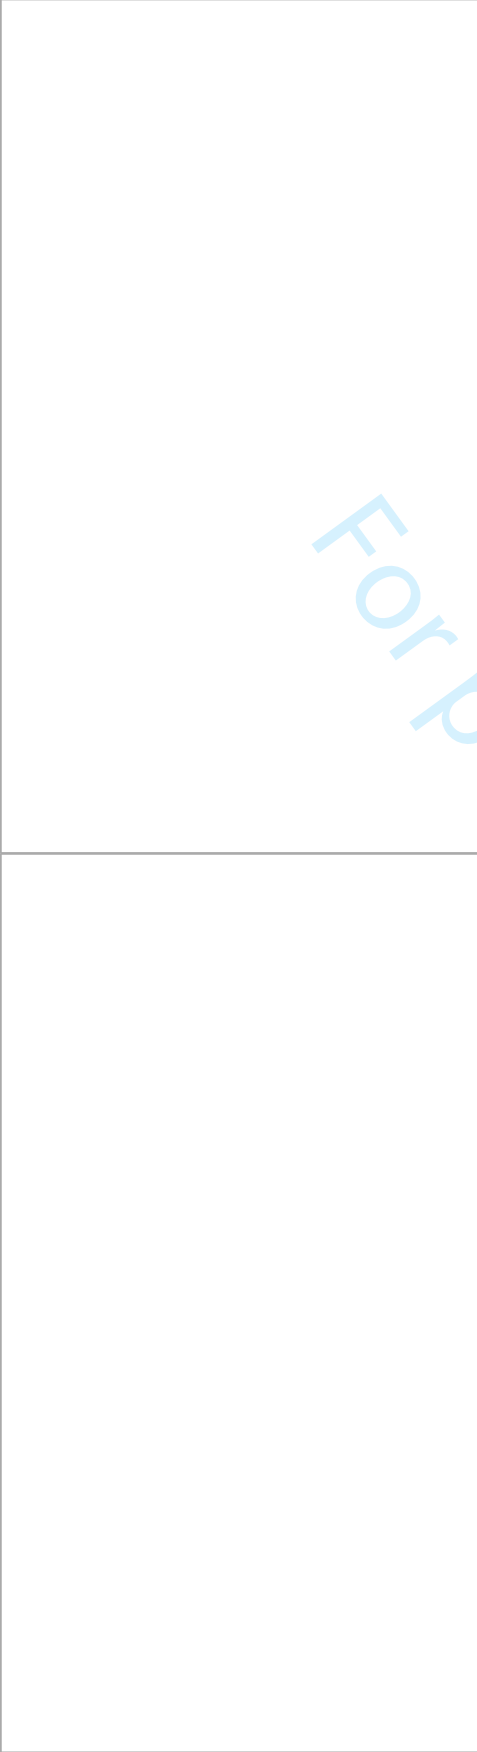

For peer review only

1  
2  
3  
4  
5  
6  
7  
8  
9  
10  
11  
12  
13  
14  
15  
16  
17  
18  
19  
20  
21  
22  
23  
24  
25  
26  
27  
28  
29  
30  
31  
32  
33  
34  
35  
36  
37  
38  
39  
40  
41  
42  
43  
44  
45  
46  
47  
48  
49  
50  
51  
52  
53  
54  
55  
56  
57  
58  
59  
60

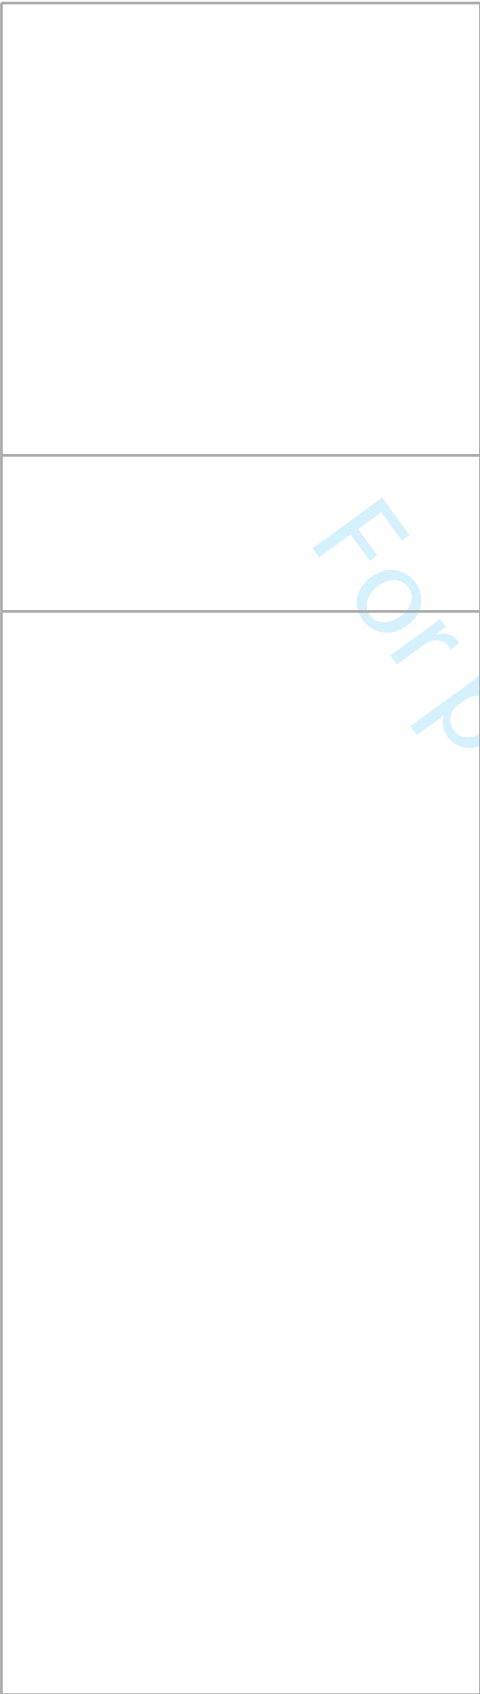

For peer review only

1  
2  
3  
4  
5  
6  
7  
8  
9  
10  
11  
12  
13  
14  
15  
16  
17  
18  
19  
20  
21  
22  
23  
24  
25  
26  
27  
28  
29  
30  
31  
32  
33  
34  
35  
36  
37  
38  
39  
40  
41  
42  
43  
44  
45  
46  
47  
48  
49  
50  
51  
52  
53  
54  
55  
56  
57  
58  
59  
60

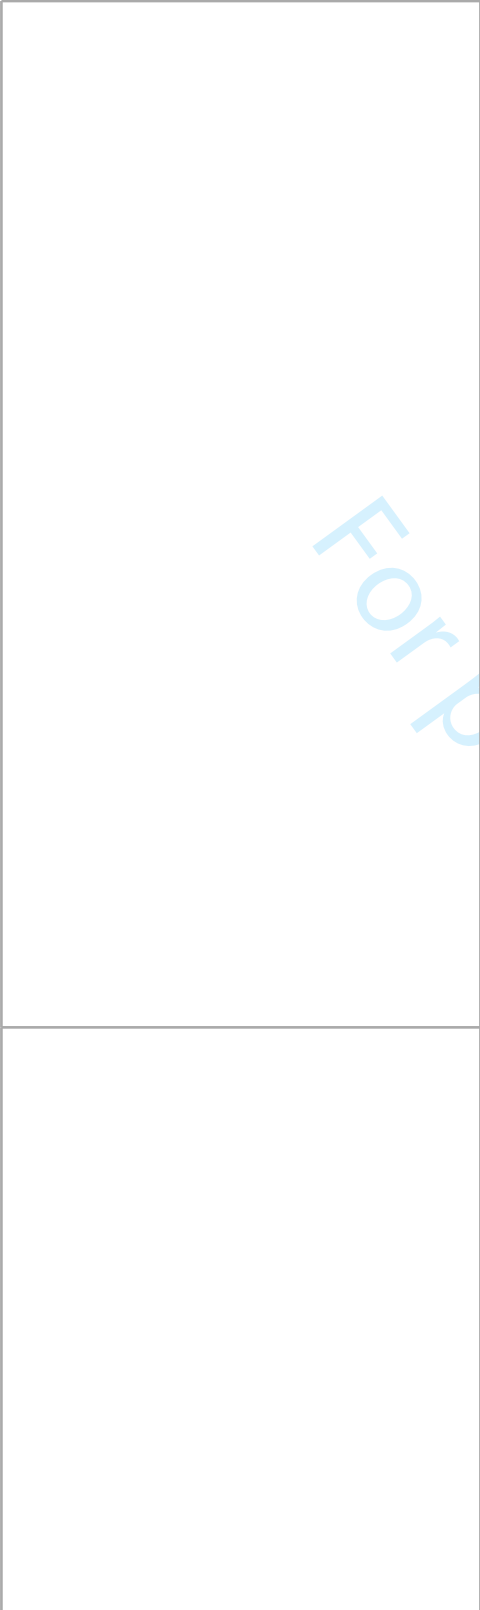

For peer review only

1  
2 problems with achieving the  
3 desired effect' included time  
4 interval until death that was longer  
5 than the doctor had expected or  
6 the absence of the intended coma.  
7 In comparison with specialists,  
8 general practitioners and nursing  
9 home physicians reported  
10 significantly more technical  
11 problems ( $p < 0.001$ ) and problems  
12 with achieving the desired effect ( $p$   
13 = 0.04).  
14  
15  
16  
17  
18  
19  
20  
21  
22  
23  
24  
25  
26  
27  
28  
29  
30  
31  
32  
33  
34  
35  
36  
37  
38  
39  
40  
41  
42  
43  
44  
45  
46  
47  
48  
49  
50  
51  
52  
53  
54  
55  
56  
57  
58  
59  
60

1  
2  
3  
4  
5  
6  
7  
8  
9  
10  
11  
12  
13  
14  
15  
16  
17  
18  
19  
20  
21  
22  
23  
24  
25  
26  
27  
28  
29  
30  
31  
32  
33  
34  
35  
36  
37  
38  
39  
40  
41  
42  
43  
44  
45  
46  
47  
48  
49  
50  
51  
52  
53  
54  
55  
56  
57  
58  
59  
60

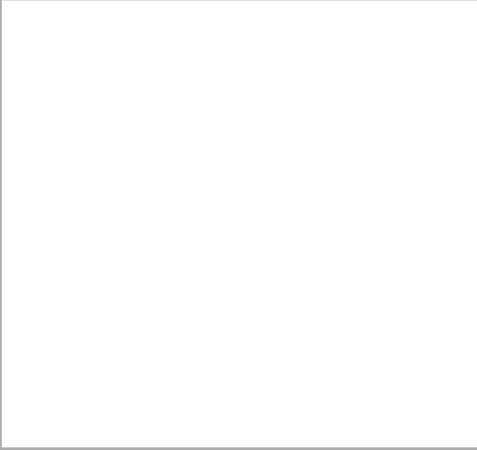

Providers were distressed by death of patient one day after taking medication

For peer review only



1  
2  
3  
4  
5  
6  
7  
8  
9  
10  
11  
12  
13  
14  
15  
16  
17  
18  
19  
20  
21  
22  
23  
24  
25  
26  
27  
28  
29  
30  
31  
32  
33  
34  
35  
36  
37  
38  
39  
40  
41  
42  
43  
44  
45  
46  
47  
48  
49  
50  
51  
52  
53  
54  
55  
56  
57  
58  
59  
60

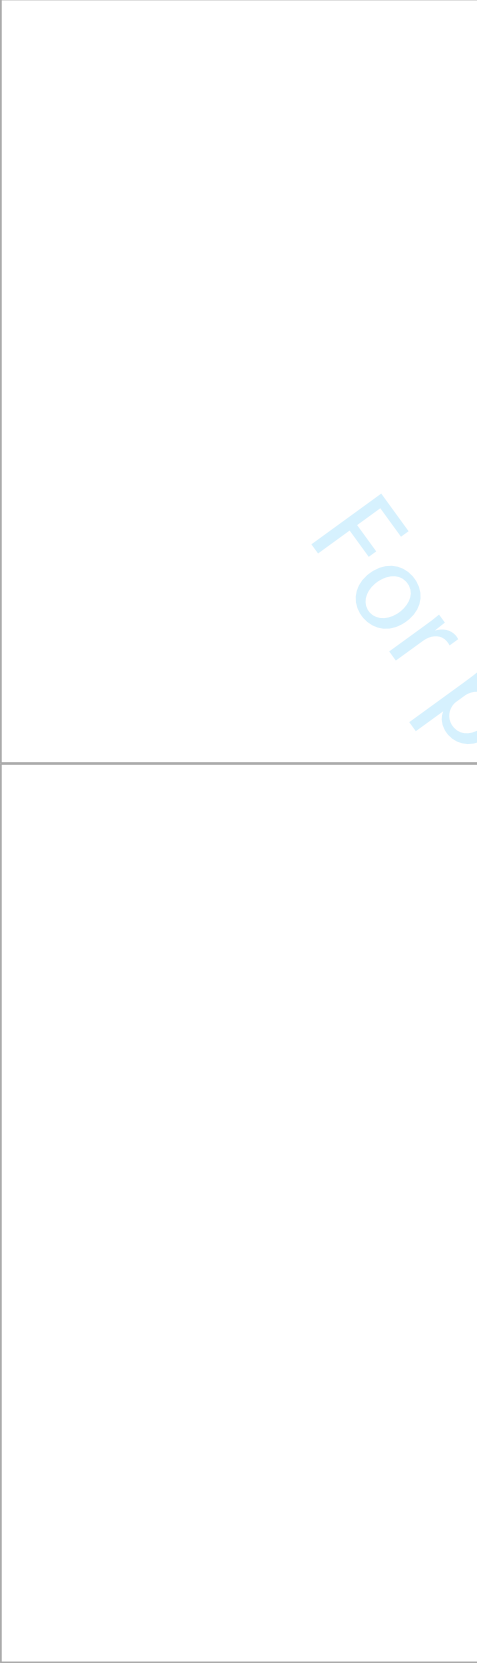

For peer review only

1  
2  
3  
4  
5  
6  
7  
8  
9  
10  
11  
12  
13  
14  
15  
16  
17  
18  
19  
20  
21  
22  
23  
24  
25  
26  
27  
28  
29  
30  
31  
32  
33  
34  
35  
36  
37  
38  
39  
40  
41  
42  
43  
44  
45  
46  
47  
48  
49  
50  
51  
52  
53  
54  
55  
56  
57  
58  
59  
60

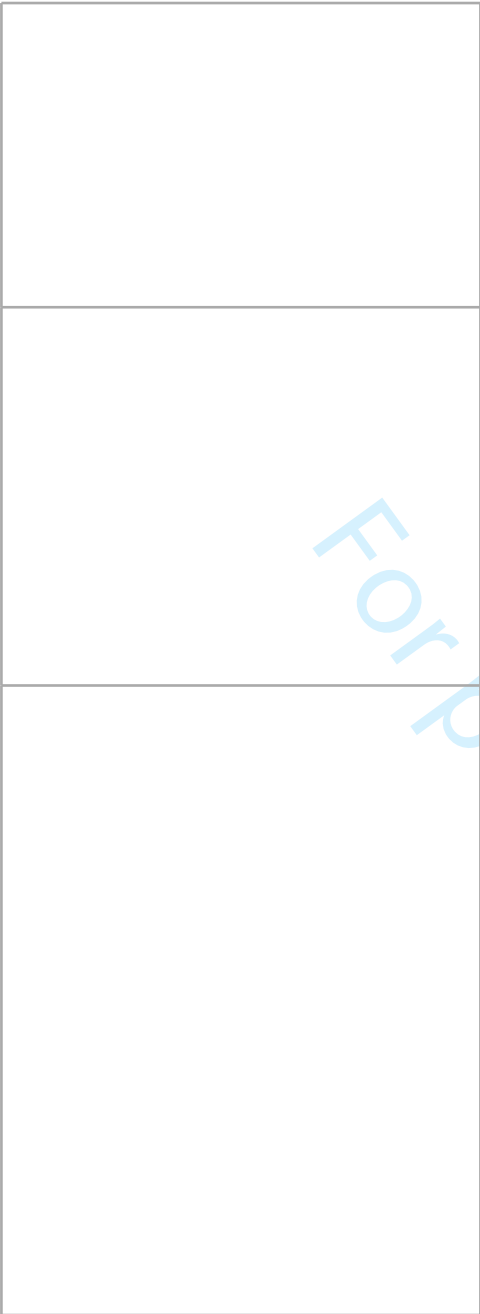

For peer review only







1  
2  
3  
4  
5  
6  
7  
8  
9  
10  
11  
12  
13  
14  
15  
16  
17  
18  
19  
20  
21  
22  
23  
24  
25  
26  
27  
28  
29  
30  
31  
32  
33  
34  
35  
36  
37  
38  
39  
40  
41  
42  
43  
44  
45  
46  
47  
48  
49  
50  
51  
52  
53  
54  
55  
56  
57  
58  
59  
60

A majority of oncologists (54.0%) found comfort in knowing they “helped a patient end his or her life the way the [patient]wished”. A quarter of oncologists regretted performing euthanasia or PAS. While some of these oncologists also feared prosecution, it is clear from the interviews that in all cases the regret resulted from concerns other than pro-ecution. A third of oncologists felt that the “emotional burdenas sociated with [their euthanasia and PAS] decision . . . affected the way they practice medicine. Conversely,the others said the emotional burden was adverse. Fors ome it made them avoid situations that might create a request for euthanasia or PAS.

For peer review only









1  
2  
3  
4  
5  
6  
7  
8  
9  
10  
11  
12  
13  
14  
15  
16  
17  
18  
19  
20  
21  
22  
23  
24  
25  
26  
27  
28  
29  
30  
31  
32  
33  
34  
35  
36  
37  
38  
39  
40  
41  
42  
43  
44  
45  
46  
47  
48  
49  
50  
51  
52  
53  
54  
55  
56  
57  
58  
59  
60

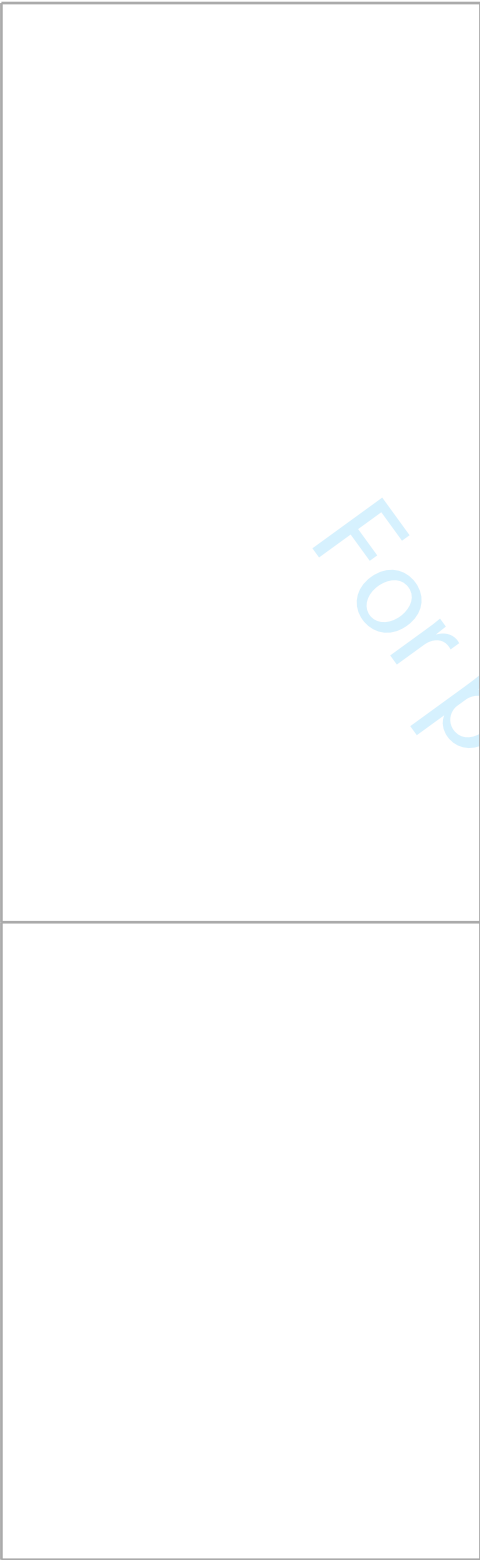

For peer review only



1  
2  
3  
4  
5  
6  
7  
8  
9  
10  
11  
12  
13  
14  
15  
16  
17  
18  
19  
20  
21  
22  
23  
24  
25  
26  
27  
28  
29  
30  
31  
32  
33  
34  
35  
36  
37  
38  
39  
40  
41  
42  
43  
44  
45  
46  
47  
48  
49  
50  
51  
52  
53  
54  
55  
56  
57  
58  
59  
60

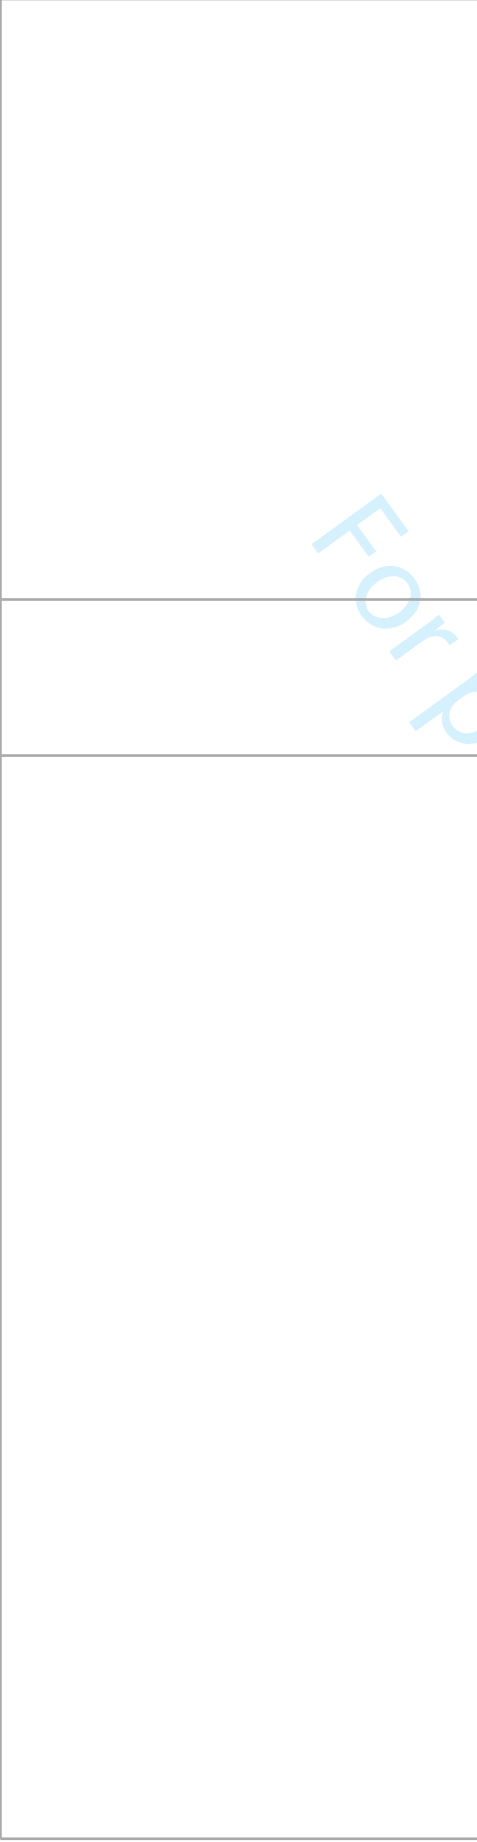

For peer review only

1  
2  
3  
4  
5  
6  
7  
8  
9  
10  
11  
12  
13  
14  
15  
16  
17  
18  
19  
20  
21  
22  
23  
24  
25  
26  
27  
28  
29  
30  
31  
32  
33  
34  
35  
36  
37  
38  
39  
40  
41  
42  
43  
44  
45  
46  
47  
48  
49  
50  
51  
52  
53  
54  
55  
56  
57  
58  
59  
60

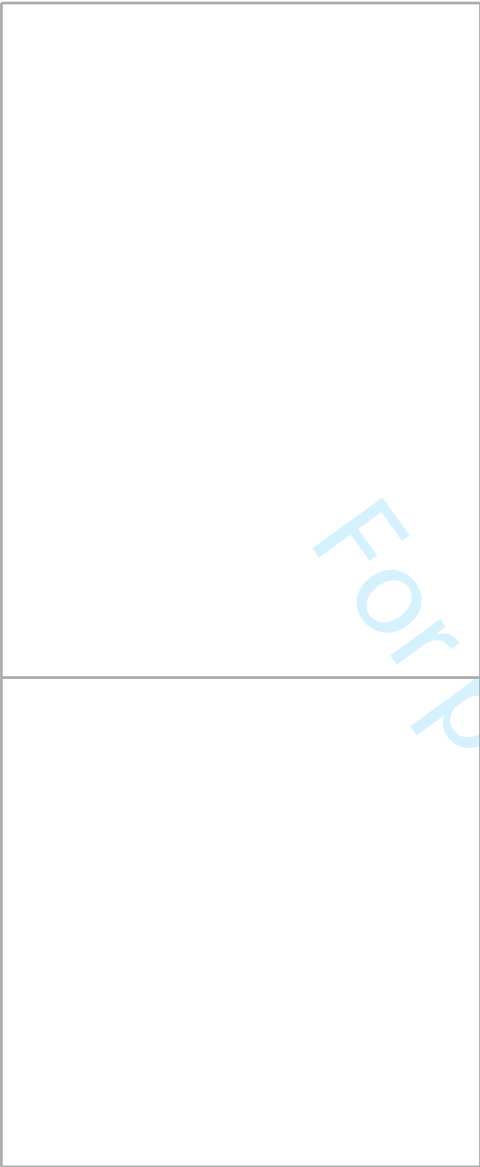

For peer review only

1  
2  
3  
4  
5  
6  
7  
8  
9  
10  
11  
12  
13  
14  
15  
16  
17  
18  
19  
20  
21  
22  
23  
24  
25  
26  
27  
28  
29  
30  
31  
32  
33  
34  
35  
36  
37  
38  
39  
40  
41  
42  
43  
44  
45  
46  
47  
48  
49  
50  
51  
52  
53  
54  
55  
56  
57  
58  
59  
60

Debriefing is held within 2 weeks after procedure to discuss any moral distress.

For peer review only

1  
2  
3  
4  
5  
6  
7  
8  
9  
10  
11  
12  
13  
14  
15  
16  
17  
18  
19  
20  
21  
22  
23  
24  
25  
26  
27  
28  
29  
30  
31  
32  
33  
34  
35  
36  
37  
38  
39  
40  
41  
42  
43  
44  
45  
46  
47  
48  
49  
50  
51  
52  
53  
54  
55  
56  
57  
58  
59  
60

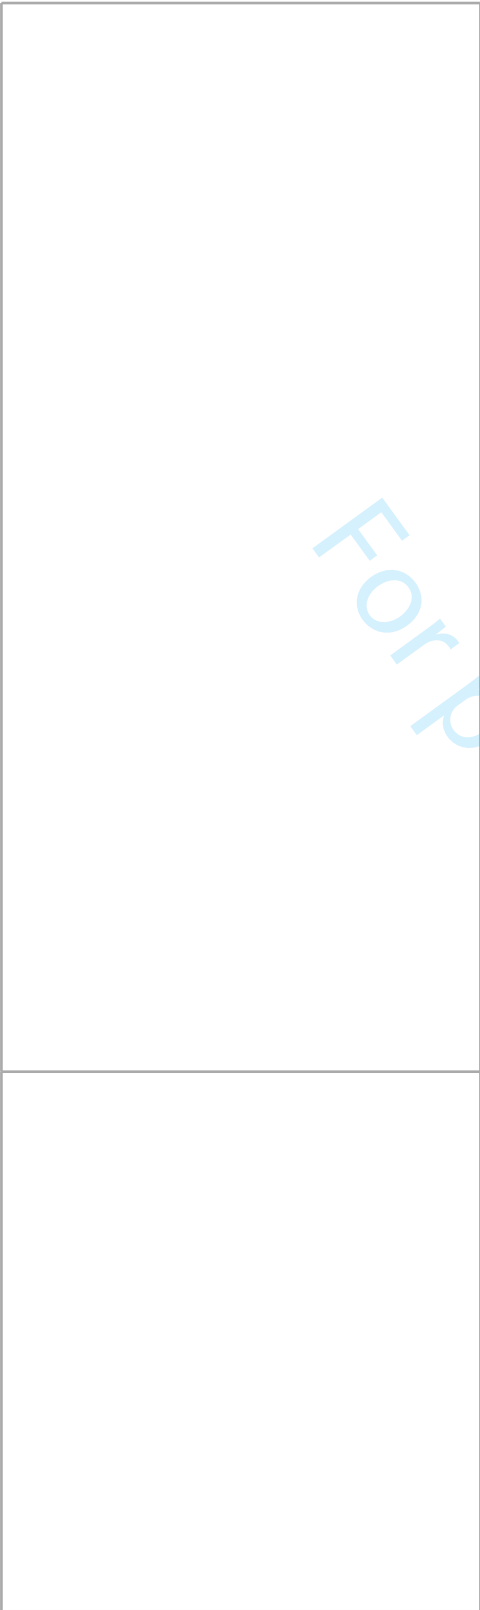

For peer review only

1  
2  
3  
4  
5  
6  
7  
8  
9  
10  
11  
12  
13  
14  
15  
16  
17  
18  
19  
20  
21  
22  
23  
24  
25  
26  
27  
28  
29  
30  
31  
32  
33  
34  
35  
36  
37  
38  
39  
40  
41  
42  
43  
44  
45  
46  
47  
48  
49  
50  
51  
52  
53  
54  
55  
56  
57  
58  
59  
60

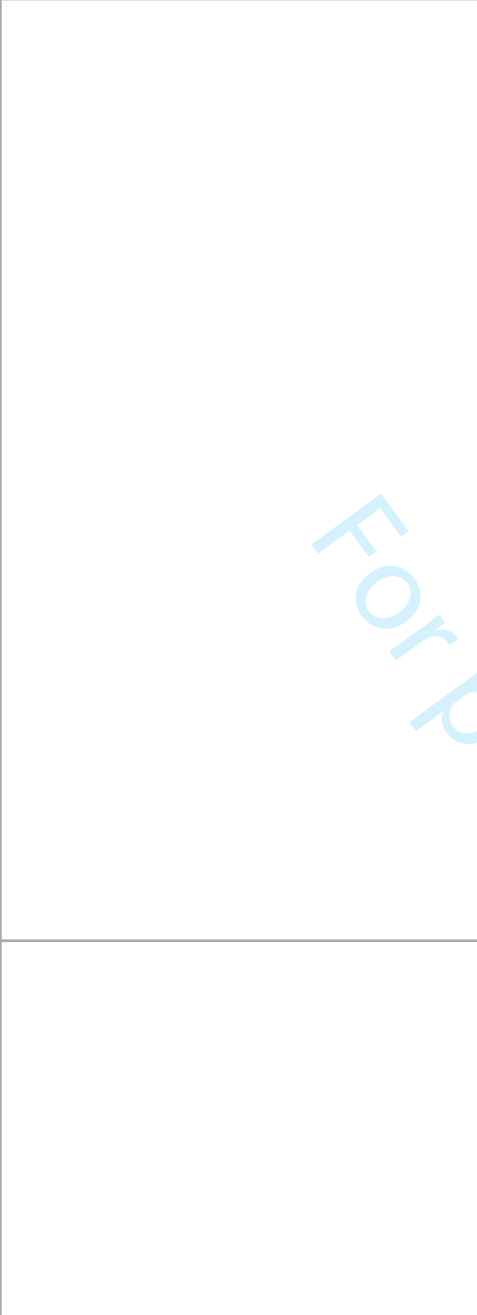

For peer review only

1  
2  
3  
4  
5  
6  
7  
8  
9  
10  
11  
12  
13  
14  
15  
16  
17  
18  
19  
20  
21  
22  
23  
24  
25  
26  
27  
28  
29  
30  
31  
32  
33  
34  
35  
36  
37  
38  
39  
40  
41  
42  
43  
44  
45  
46  
47  
48  
49  
50  
51  
52  
53  
54  
55  
56  
57  
58  
59  
60

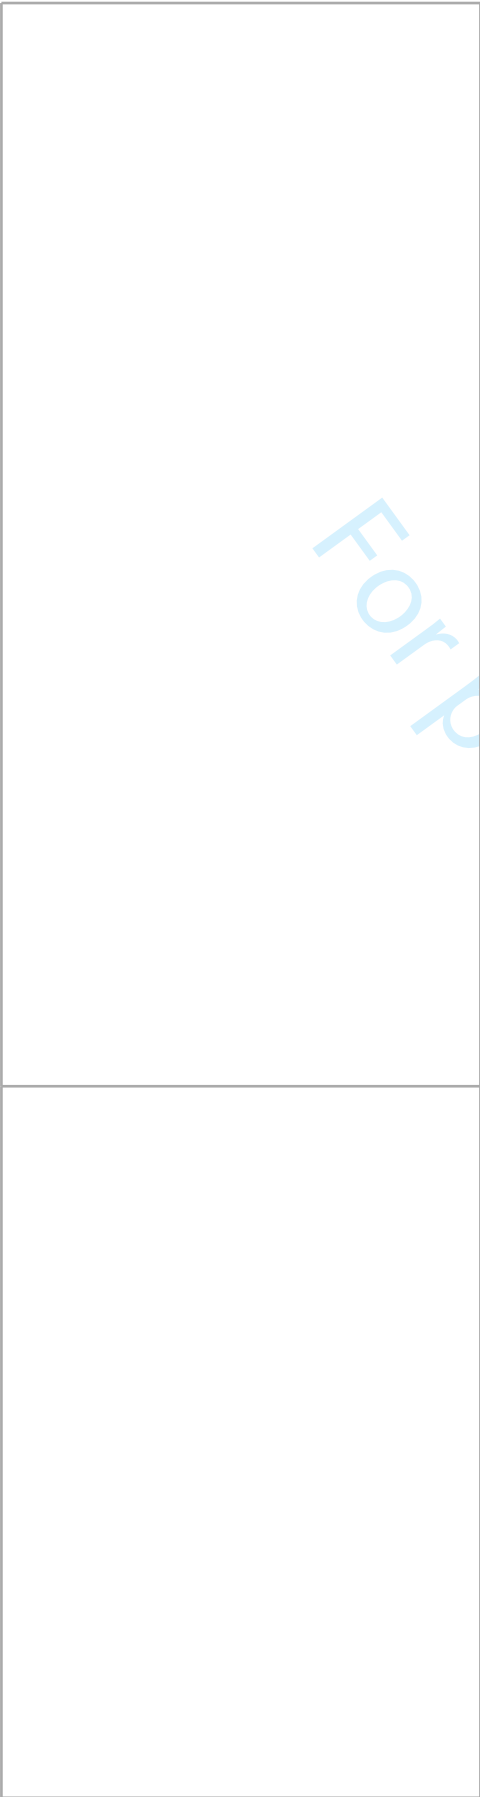

For peer review only

1  
2  
3  
4  
5  
6  
7  
8  
9  
10  
11  
12  
13  
14  
15  
16  
17  
18  
19  
20  
21  
22  
23  
24  
25  
26  
27  
28  
29  
30  
31  
32  
33  
34  
35  
36  
37  
38  
39  
40  
41  
42  
43  
44  
45  
46  
47  
48  
49  
50  
51  
52  
53  
54  
55  
56  
57  
58  
59  
60

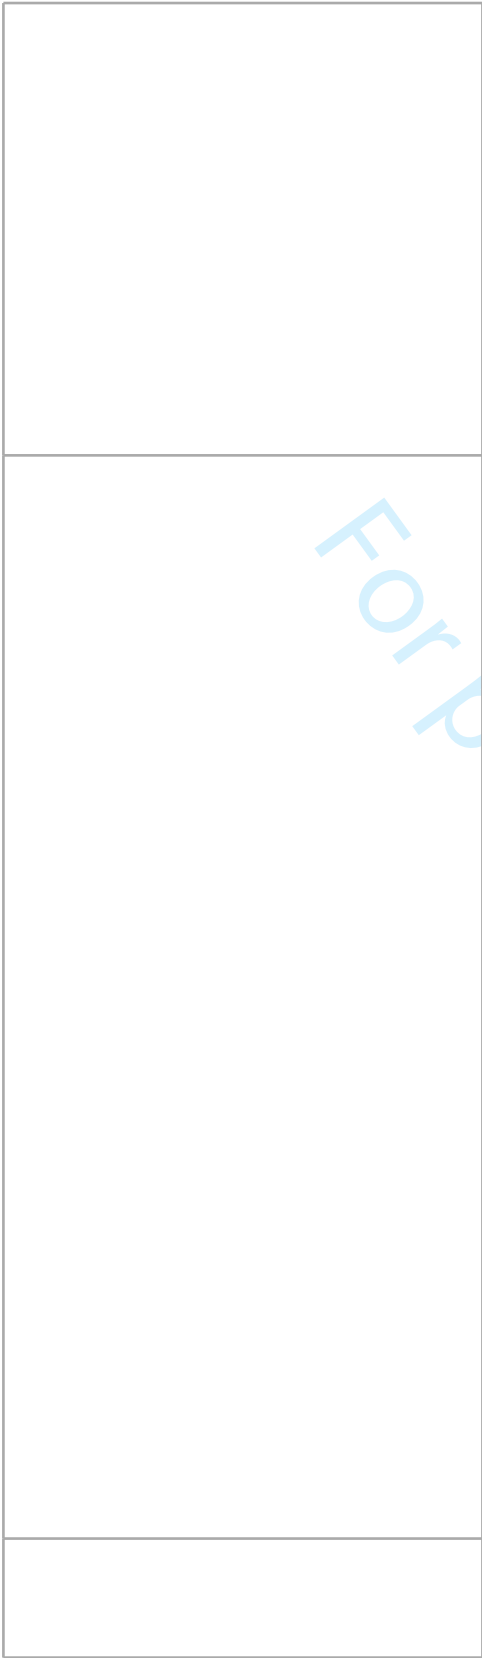

For peer review only

1  
2 According to Meier et al, 19% of  
3 physicians were uncomfortable  
4 after performing PAS, and 12%  
5 were uncomfortable after  
6 performing euthanasia. Emanuel  
7 et al reported that 25% regretted  
8 performing euthanasia or PAS  
9 and that 15% had adverse  
10 emotional reactions to  
11 performing euthanasia or PAS. At  
12 least in the cases reported by  
13 Emanuel et al, these reactions did  
14 not seem related to fear of  
15 prosecution.  
16  
17  
18  
19  
20  
21  
22  
23  
24  
25  
26  
27  
28  
29  
30  
31  
32  
33  
34  
35  
36  
37  
38  
39  
40  
41  
42  
43  
44  
45  
46  
47  
48  
49  
50  
51  
52  
53  
54  
55  
56  
57  
58  
59  
60



1  
2  
3  
4  
5  
6  
7  
8  
9  
10  
11  
12  
13  
14  
15  
16  
17  
18  
19  
20  
21  
22  
23  
24  
25  
26  
27  
28  
29  
30  
31  
32  
33  
34  
35  
36  
37  
38  
39  
40  
41  
42  
43  
44  
45  
46  
47  
48  
49  
50  
51  
52  
53  
54  
55  
56  
57  
58  
59  
60

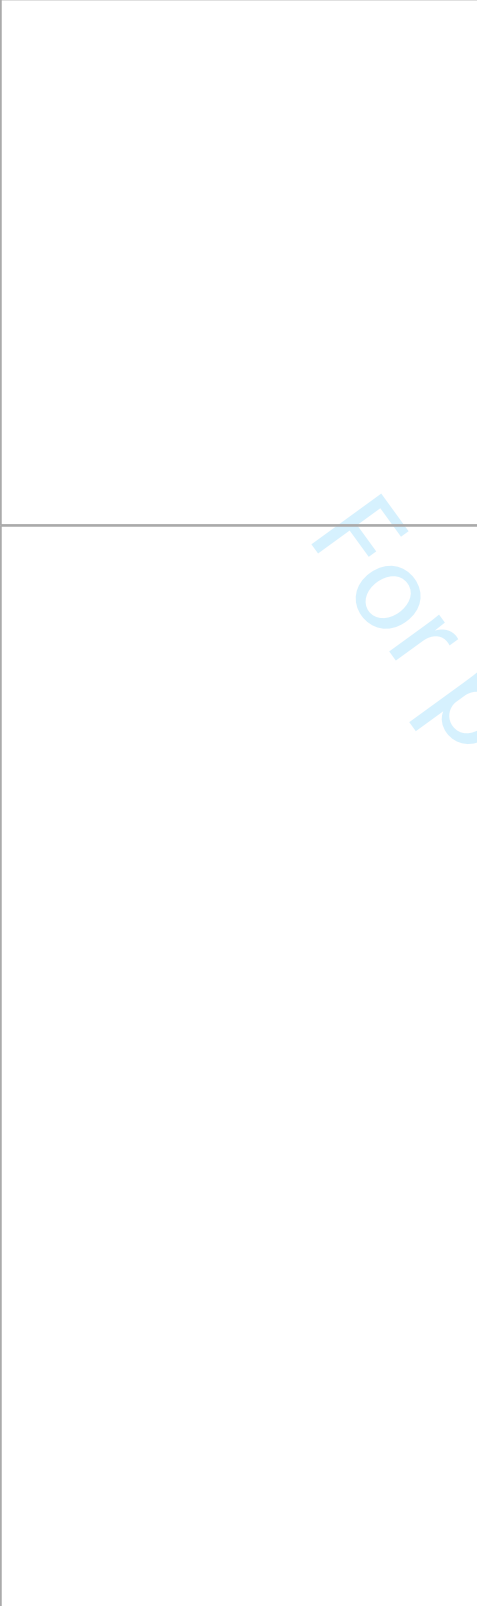

For peer review only

1  
2  
3  
4  
5  
6  
7  
8  
9  
10  
11  
12  
13  
14  
15  
16  
17  
18  
19  
20  
21  
22  
23  
24  
25  
26  
27  
28  
29  
30  
31  
32  
33  
34  
35  
36  
37  
38  
39  
40  
41  
42  
43  
44  
45  
46  
47  
48  
49  
50  
51  
52  
53  
54  
55  
56  
57  
58  
59  
60

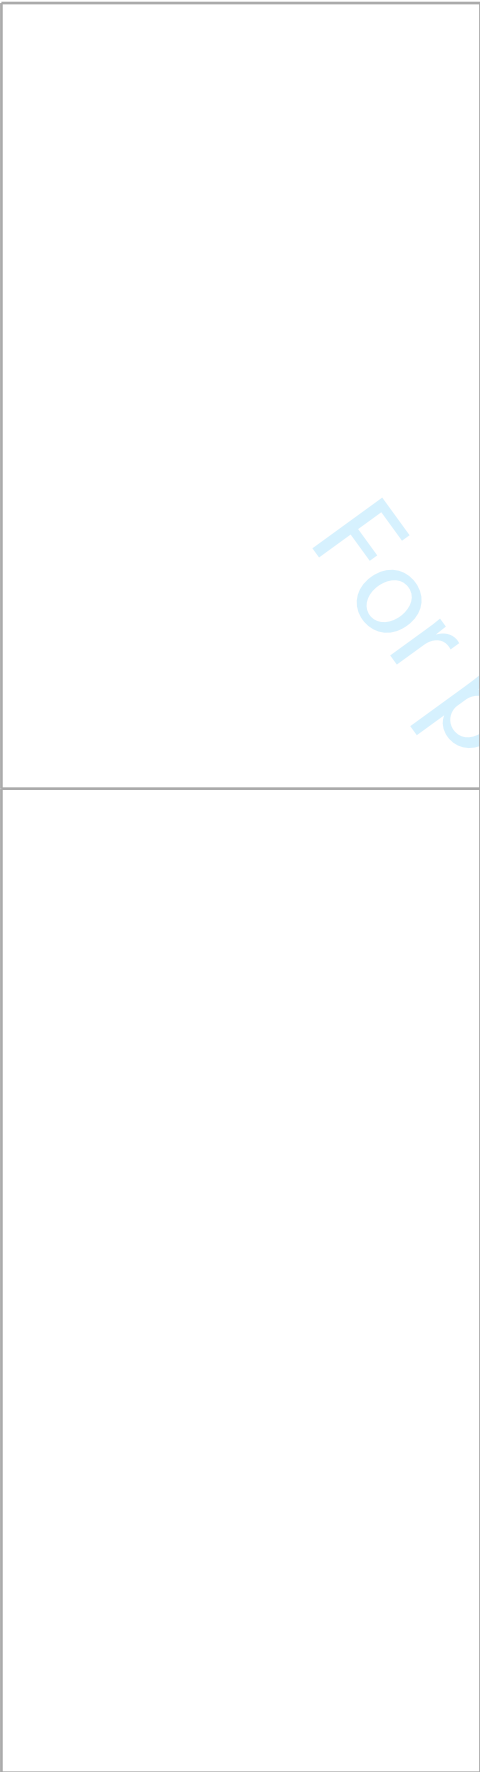

For peer review only

1  
2  
3  
4  
5  
6  
7  
8  
9  
10  
11  
12  
13  
14  
15  
16  
17  
18  
19  
20  
21  
22  
23  
24  
25  
26  
27  
28  
29  
30  
31  
32  
33  
34  
35  
36  
37  
38  
39  
40  
41  
42  
43  
44  
45  
46  
47  
48  
49  
50  
51  
52  
53  
54  
55  
56  
57  
58  
59  
60

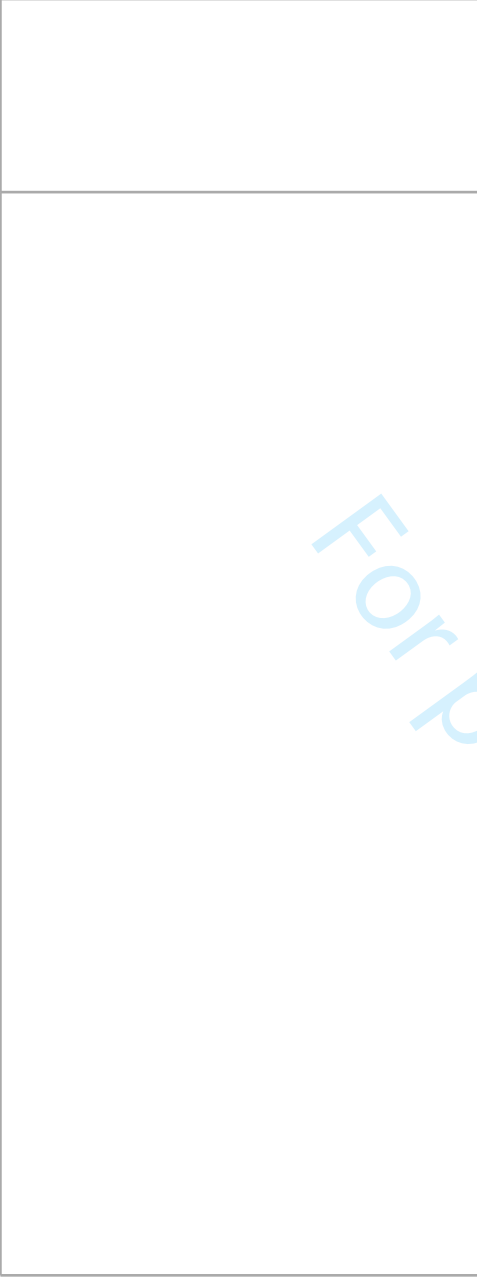

For peer review only

1  
2  
3  
4  
5  
6  
7  
8  
9  
10  
11  
12  
13  
14  
15  
16  
17  
18  
19  
20  
21  
22  
23  
24  
25  
26  
27  
28  
29  
30  
31  
32  
33  
34  
35  
36  
37  
38  
39  
40  
41  
42  
43  
44  
45  
46  
47  
48  
49  
50  
51  
52  
53  
54  
55  
56  
57  
58  
59  
60

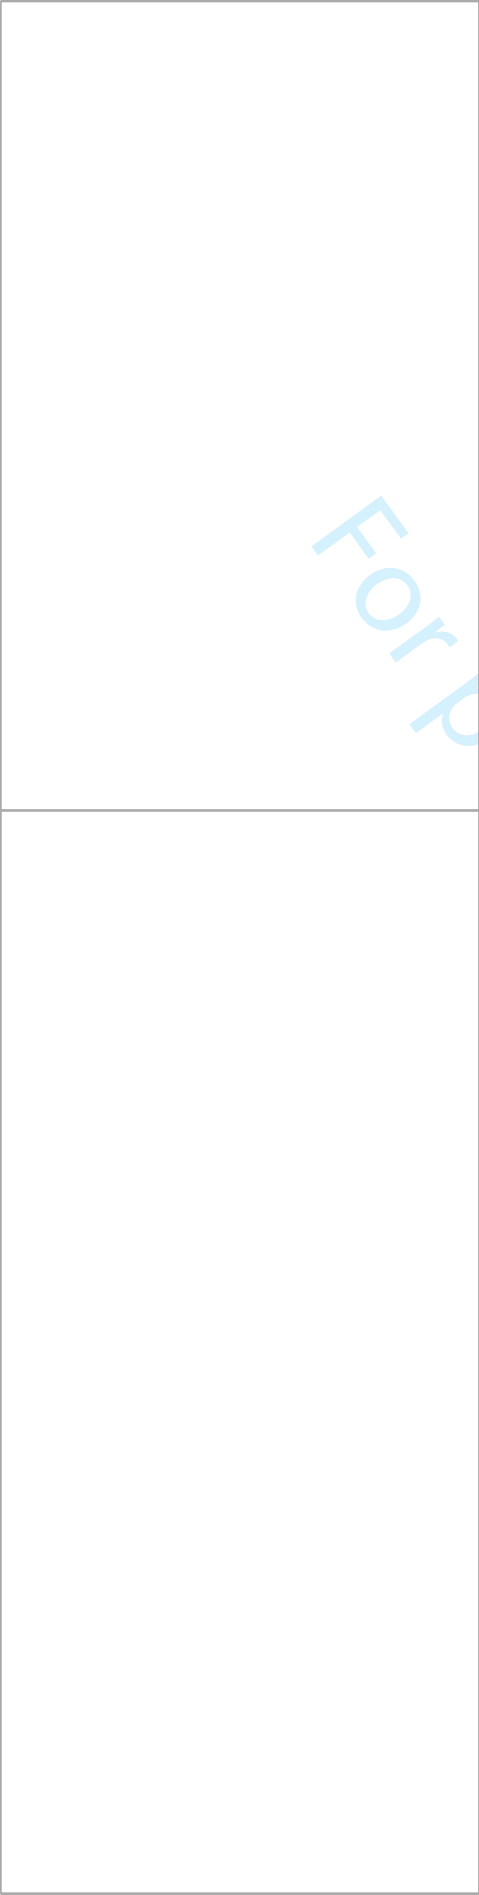

For peer review only

1  
2  
3  
4  
5  
6  
7  
8  
9  
10  
11  
12  
13  
14  
15  
16  
17  
18  
19  
20  
21  
22  
23  
24  
25  
26  
27  
28  
29  
30  
31  
32  
33  
34  
35  
36  
37  
38  
39  
40  
41  
42  
43  
44  
45  
46  
47  
48  
49  
50  
51  
52  
53  
54  
55  
56  
57  
58  
59  
60

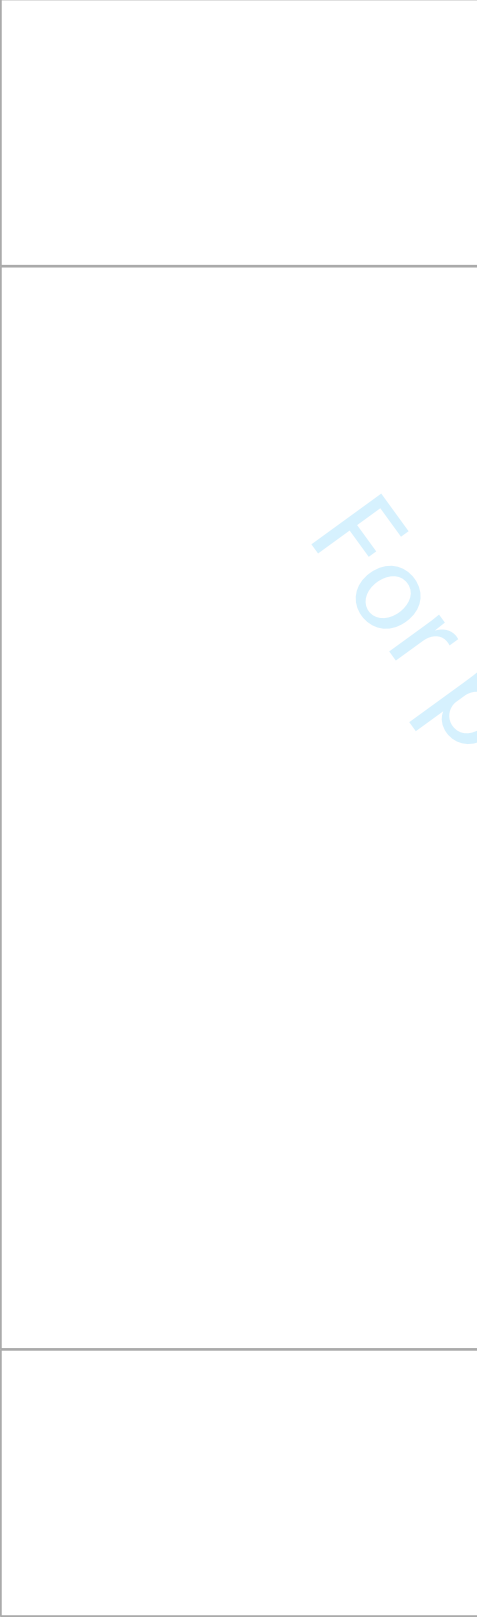

1  
2  
3  
4  
5  
6  
7  
8  
9  
10  
11  
12  
13  
14  
15  
16  
17  
18  
19  
20  
21  
22  
23  
24  
25  
26  
27  
28  
29  
30  
31  
32  
33  
34  
35  
36  
37  
38  
39  
40  
41  
42  
43  
44  
45  
46  
47  
48  
49  
50  
51  
52  
53  
54  
55  
56  
57  
58  
59  
60

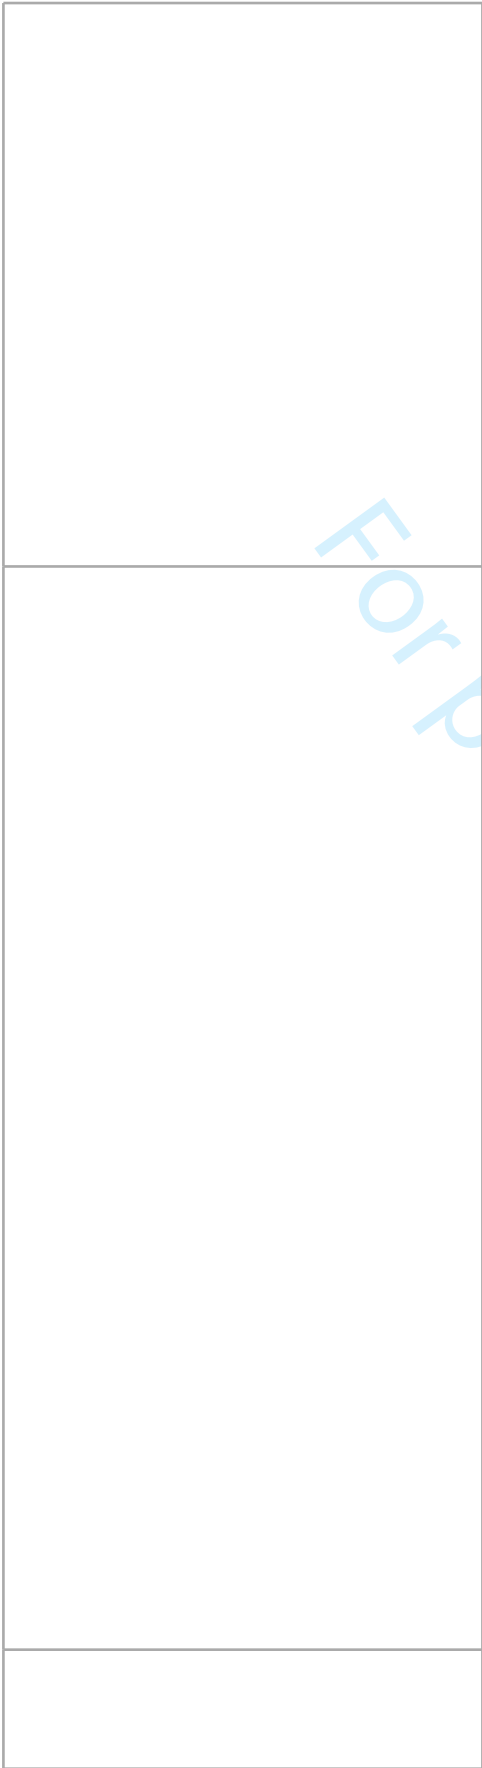

For peer review only



1  
2  
3  
4  
5  
6  
7  
8  
9  
10  
11  
12  
13  
14  
15  
16  
17  
18  
19  
20  
21  
22  
23  
24  
25  
26  
27  
28  
29  
30  
31  
32  
33  
34  
35  
36  
37  
38  
39  
40  
41  
42  
43  
44  
45  
46  
47  
48  
49  
50  
51  
52  
53  
54  
55  
56  
57  
58  
59  
60

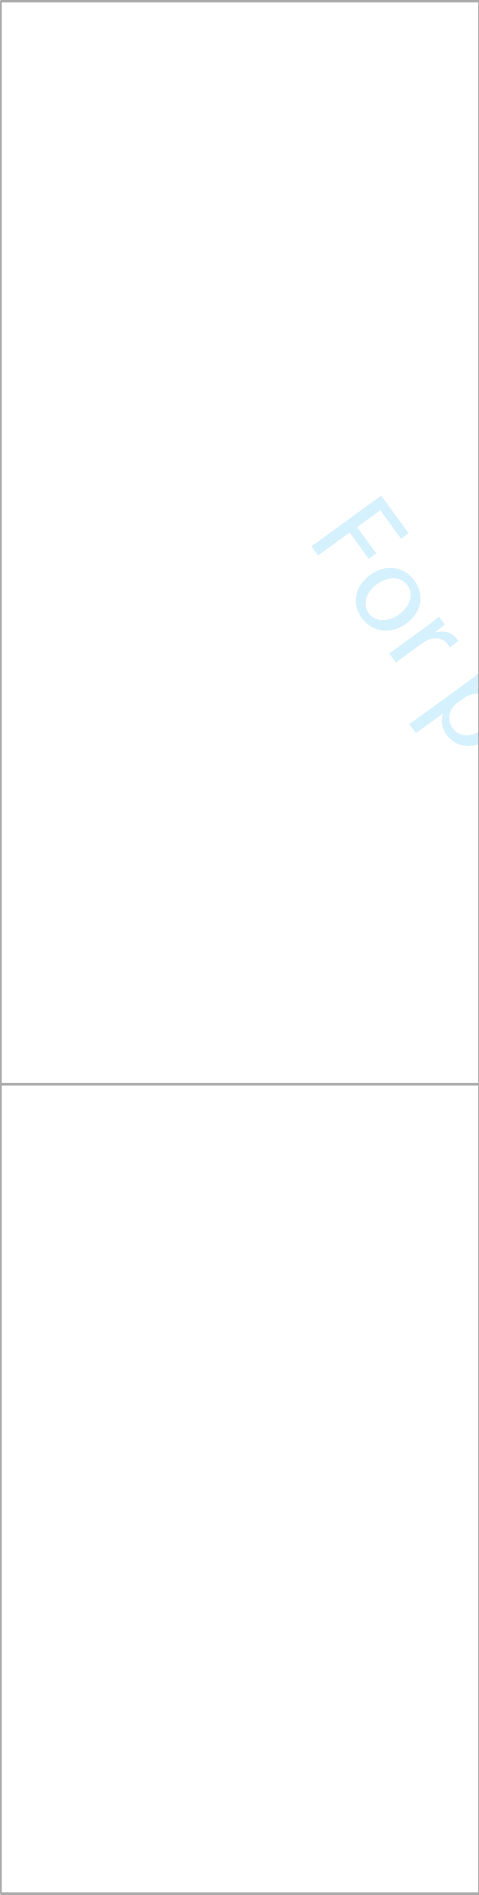

For peer review only



1  
2  
3  
4  
5  
6  
7  
8  
9  
10  
11  
12  
13  
14  
15  
16  
17  
18  
19  
20  
21  
22  
23  
24  
25  
26  
27  
28  
29  
30  
31  
32  
33  
34  
35  
36  
37  
38  
39  
40  
41  
42  
43  
44  
45  
46  
47  
48  
49  
50  
51  
52  
53  
54  
55  
56  
57  
58  
59  
60

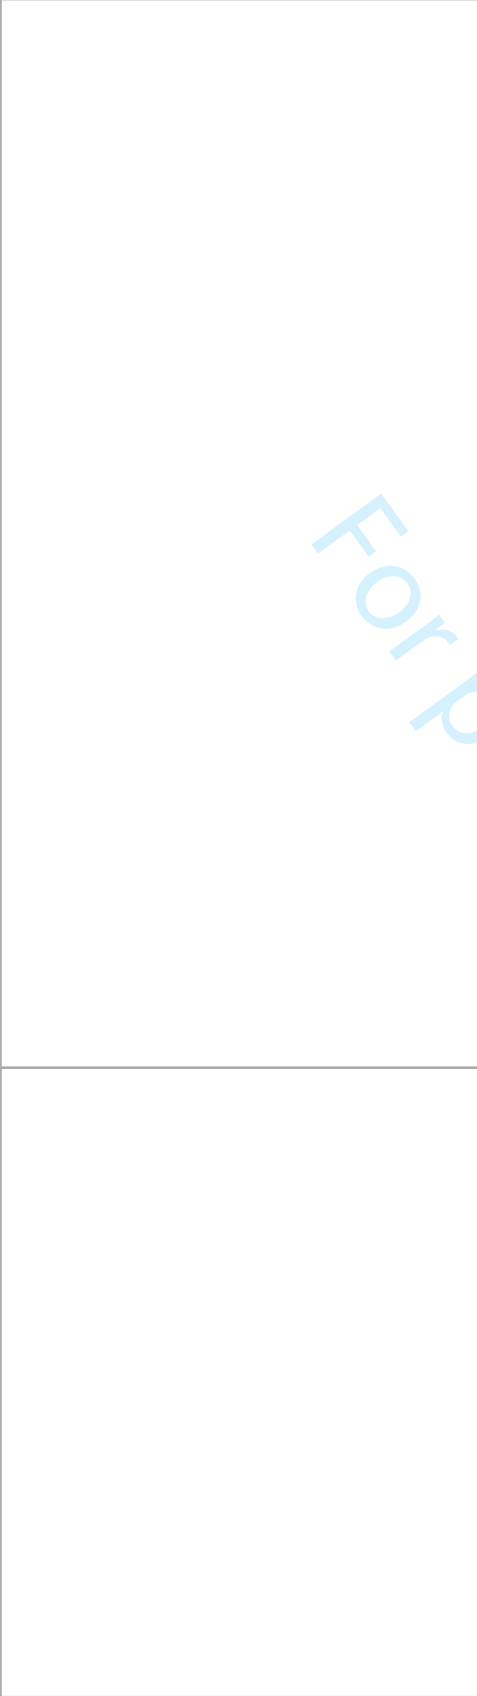

For peer review only

1  
2  
3  
4  
5  
6  
7  
8  
9  
10  
11  
12  
13  
14  
15  
16  
17  
18  
19  
20  
21  
22  
23  
24  
25  
26  
27  
28  
29  
30  
31  
32  
33  
34  
35  
36  
37  
38  
39  
40  
41  
42  
43  
44  
45  
46  
47  
48  
49  
50  
51  
52  
53  
54  
55  
56  
57  
58  
59  
60

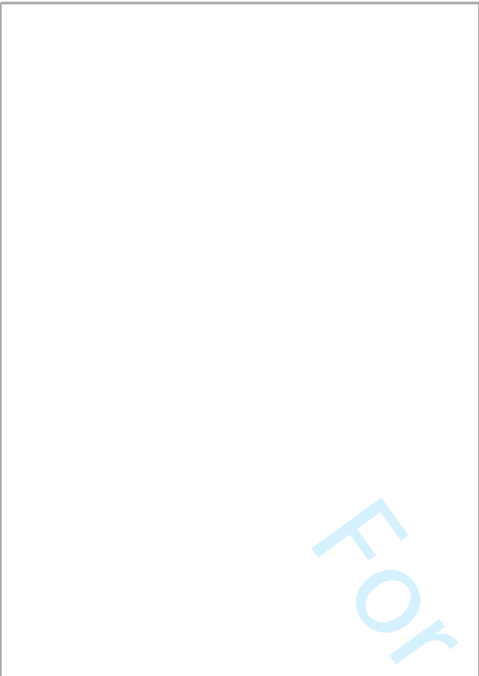

One case: practitioner became overwhelmed and stressed by situation.

For peer review only

1  
2  
3  
4  
5  
6  
7  
8  
9  
10  
11  
12  
13  
14  
15  
16  
17  
18  
19  
20  
21  
22  
23  
24  
25  
26  
27  
28  
29  
30  
31  
32  
33  
34  
35  
36  
37  
38  
39  
40  
41  
42  
43  
44  
45  
46  
47  
48  
49  
50  
51  
52  
53  
54  
55  
56  
57  
58  
59  
60

Some nurses felt physicians did not comply with due care requirements of the law

Nurses not informed about aim of administered medication (to hasten the patient's death).

For peer review only

1  
2  
3  
4  
5  
6  
7  
8  
9  
10  
11  
12  
13  
14  
15  
16  
17  
18  
19  
20  
21  
22  
23  
24  
25  
26  
27  
28  
29  
30  
31  
32  
33  
34  
35  
36  
37  
38  
39  
40  
41  
42  
43  
44  
45  
46  
47  
48  
49  
50  
51  
52  
53  
54  
55  
56  
57  
58  
59  
60

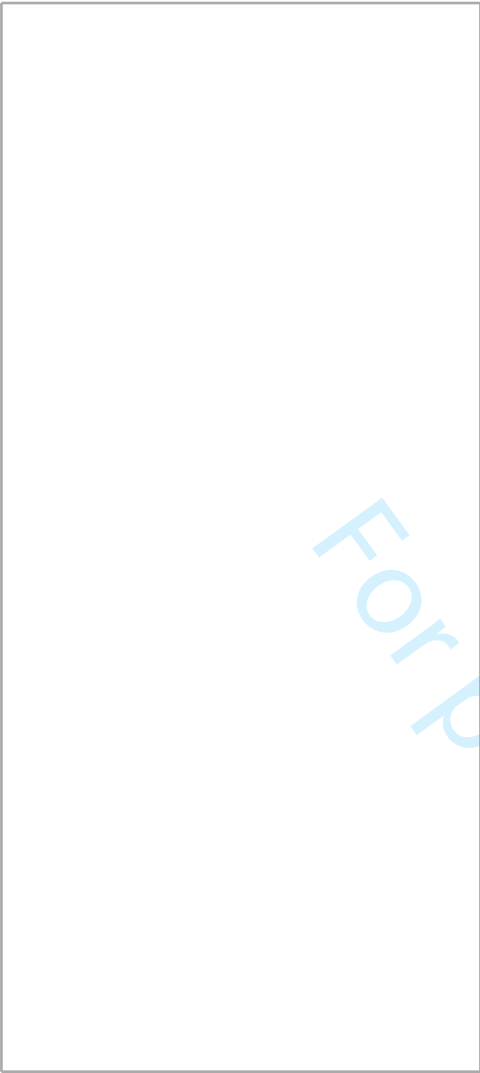

For peer review only

1  
2  
3  
4  
5  
6  
7  
8  
9  
10  
11  
12  
13  
14  
15  
16  
17  
18  
19  
20  
21  
22  
23  
24  
25  
26  
27  
28  
29  
30  
31  
32  
33  
34  
35  
36  
37  
38  
39  
40  
41  
42  
43  
44  
45  
46  
47  
48  
49  
50  
51  
52  
53  
54  
55  
56  
57  
58  
59  
60

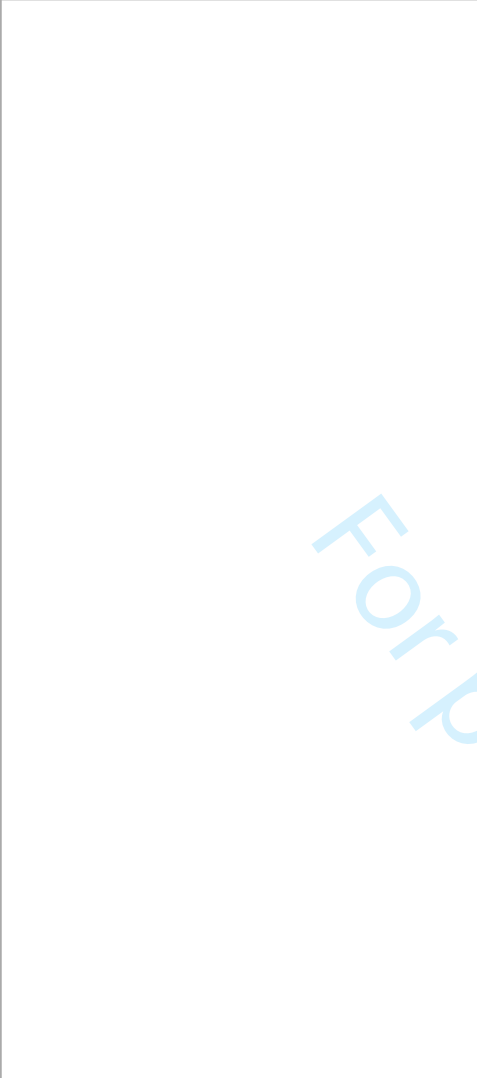

For peer review only

1  
2  
3  
4  
5  
6  
7  
8  
9  
10  
11  
12  
13  
14  
15  
16  
17  
18  
19  
20  
21  
22  
23  
24  
25  
26  
27  
28  
29  
30  
31  
32  
33  
34  
35  
36  
37  
38  
39  
40  
41  
42  
43  
44  
45  
46  
47  
48  
49  
50  
51  
52  
53  
54  
55  
56  
57  
58  
59  
60

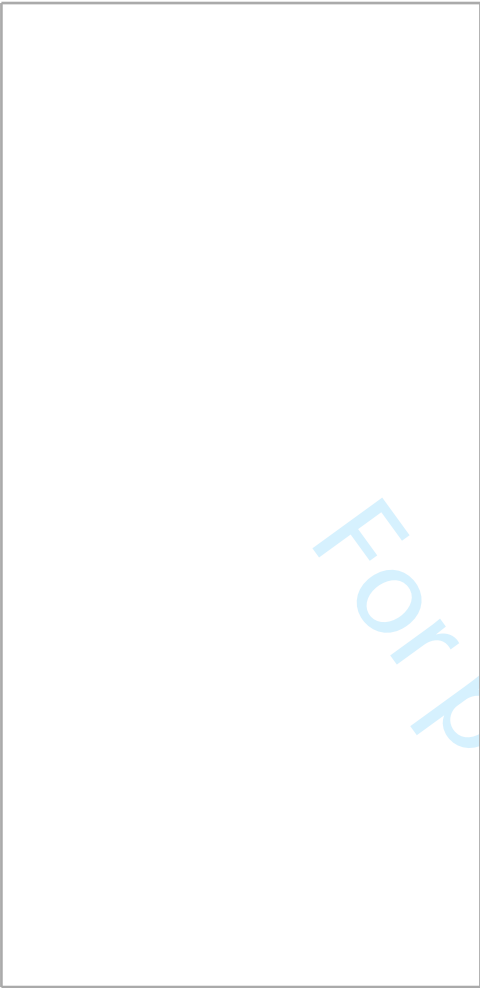

For peer review only

1  
2 Physicians have been reported to  
3 have emotional (28%) or  
4 burdensome (25%) feelings and  
5 to experience general discomfort  
6 in 42% of all cases of life-  
7 termination. Many older PCPs  
8 described problematic, and  
9 sometimes even traumatic  
10 experiences, such as loneliness,  
11 mixed feelings, and contradictory  
12 emotions in relation to their first  
13 occasion assisting in life-  
14 termination. Some PCPs regretted  
15 their first performance of  
16 euthanasia for reasons such as  
17 'insufficient awareness [of the  
18 other pal-liative possibilities,  
19 HvM]', 'having been manipulated  
20 [by the family or the patient,  
21 HvM], not having everything  
22 under control' and described their  
23 experiences as 'pioneer work', 'we  
24 learned by experience back then'.  
25 When the patient said good-bye,  
26 a number of physicians described  
27 feelings of loss and abandonment.  
28  
29  
30  
31  
32  
33  
34  
35  
36  
37  
38  
39  
40  
41  
42  
43  
44  
45  
46  
47  
48  
49  
50  
51  
52  
53  
54  
55  
56  
57  
58  
59  
60

1  
2  
3  
4  
5  
6  
7  
8  
9  
10  
11  
12  
13  
14  
15  
16  
17  
18  
19  
20  
21  
22  
23  
24  
25  
26  
27  
28  
29  
30  
31  
32  
33  
34  
35  
36  
37  
38  
39  
40  
41  
42  
43  
44  
45  
46  
47  
48  
49  
50  
51  
52  
53  
54  
55  
56  
57  
58  
59  
60

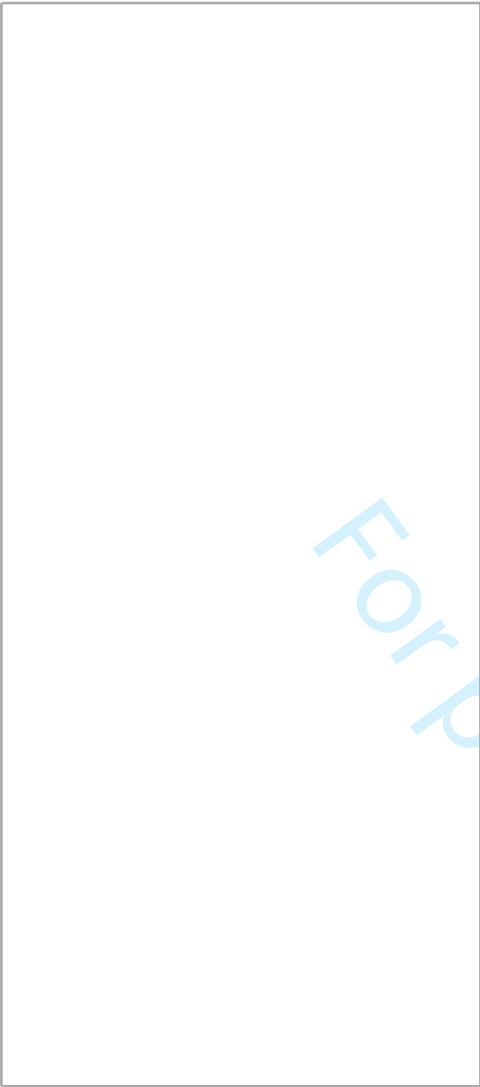

For peer review only



1  
2  
3  
4  
5  
6  
7  
8  
9  
10  
11  
12  
13  
14  
15  
16  
17  
18  
19  
20  
21  
22  
23  
24  
25  
26  
27  
28  
29  
30  
31  
32  
33  
34  
35  
36  
37  
38  
39  
40  
41  
42  
43  
44  
45  
46  
47  
48  
49  
50  
51  
52  
53  
54  
55  
56  
57  
58  
59  
60

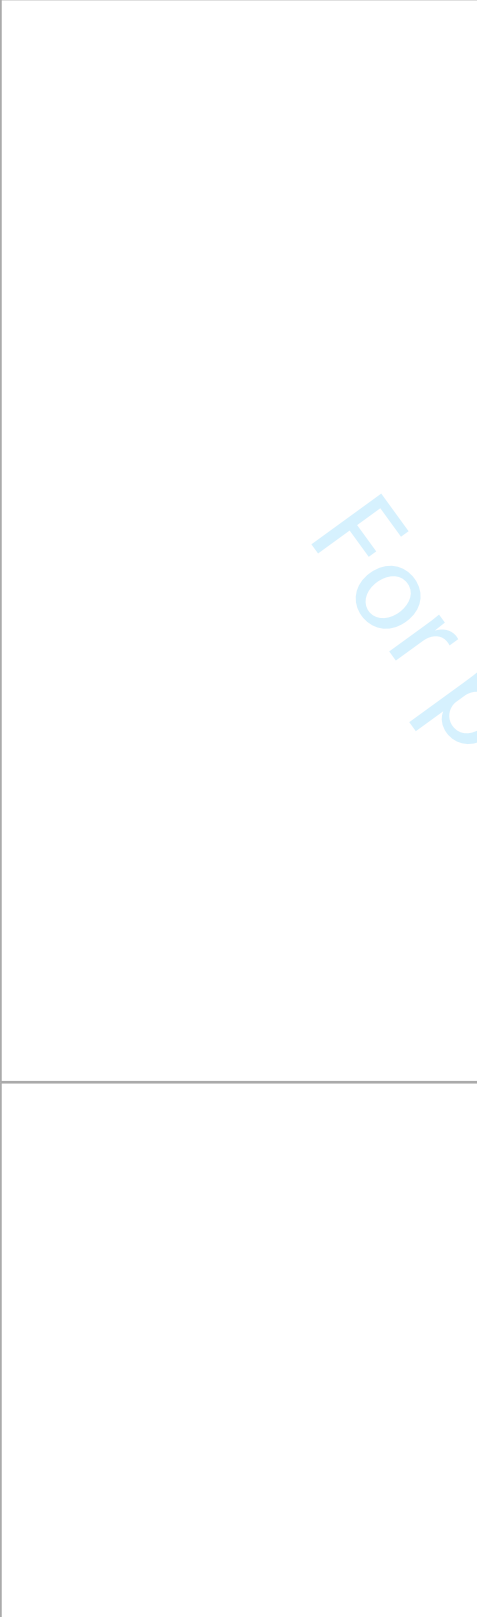

For peer review only

1  
2  
3  
4  
5  
6  
7  
8  
9  
10  
11  
12  
13  
14  
15  
16  
17  
18  
19  
20  
21  
22  
23  
24  
25  
26  
27  
28  
29  
30  
31  
32  
33  
34  
35  
36  
37  
38  
39  
40  
41  
42  
43  
44  
45  
46  
47  
48  
49  
50  
51  
52  
53  
54  
55  
56  
57  
58  
59  
60



For peer review only

1  
2  
3  
4  
5  
6  
7  
8  
9  
10  
11  
12  
13  
14  
15  
16  
17  
18  
19  
20  
21  
22  
23  
24  
25  
26  
27  
28  
29  
30  
31  
32  
33  
34  
35  
36  
37  
38  
39  
40  
41  
42  
43  
44  
45  
46  
47  
48  
49  
50  
51  
52  
53  
54  
55  
56  
57  
58  
59  
60

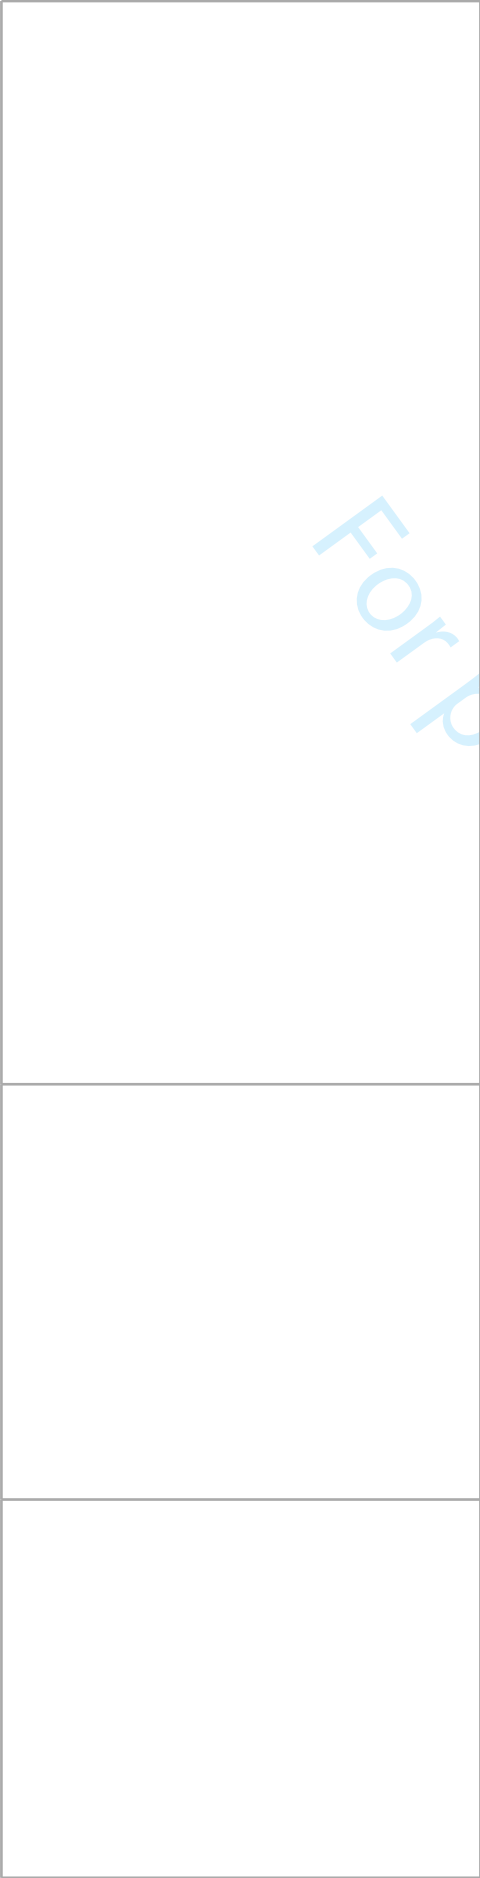

For peer review only

1  
2  
3  
4  
5  
6  
7  
8  
9  
10  
11  
12  
13  
14  
15  
16  
17  
18  
19  
20  
21  
22  
23  
24  
25  
26  
27  
28  
29  
30  
31  
32  
33  
34  
35  
36  
37  
38  
39  
40  
41  
42  
43  
44  
45  
46  
47  
48  
49  
50  
51  
52  
53  
54  
55  
56  
57  
58  
59  
60

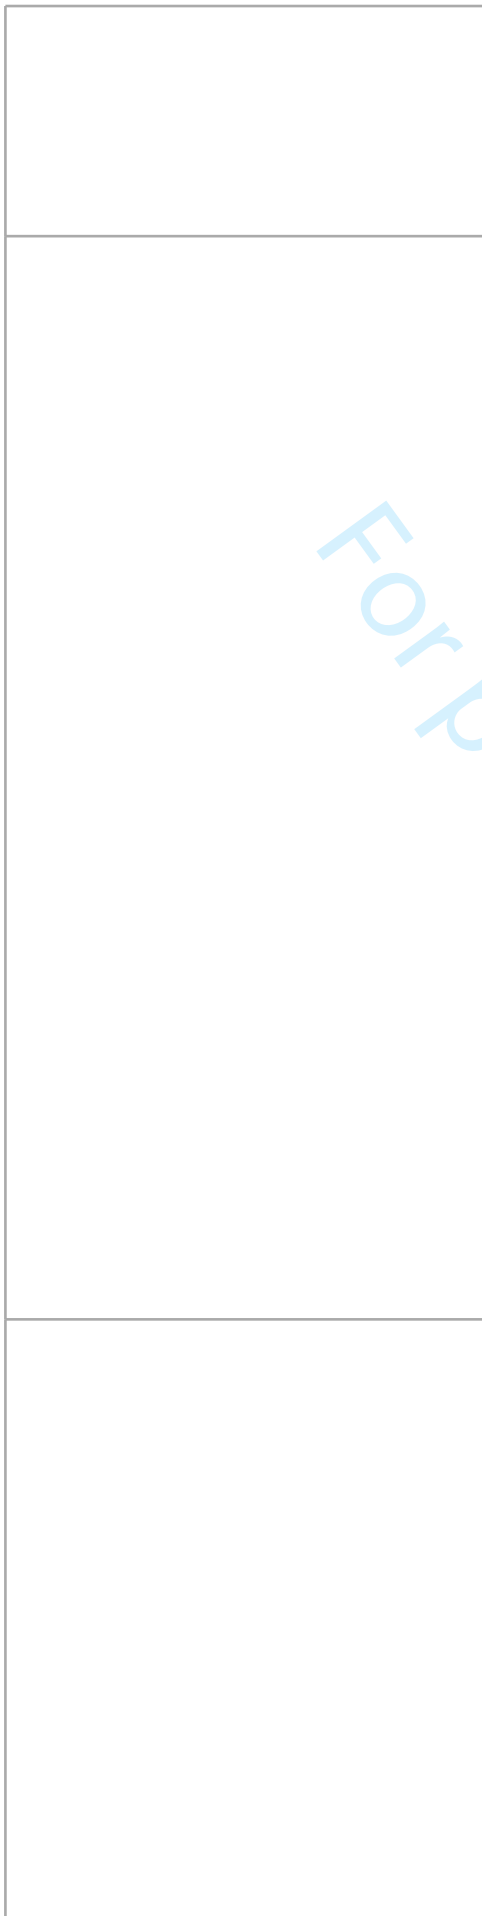

For peer review only



1  
2  
3  
4  
5  
6  
7  
8  
9  
10  
11  
12  
13  
14  
15  
16  
17  
18  
19  
20  
21  
22  
23  
24  
25  
26  
27  
28  
29  
30  
31  
32  
33  
34  
35  
36  
37  
38  
39  
40  
41  
42  
43  
44  
45  
46  
47  
48  
49  
50  
51  
52  
53  
54  
55  
56  
57  
58  
59  
60

|   |
|---|
| - |
|   |
|   |

For peer review only

1  
2  
3  
4  
5  
6  
7  
8  
9  
10  
11  
12  
13  
14  
15  
16  
17  
18  
19  
20  
21  
22  
23  
24  
25  
26  
27  
28  
29  
30  
31  
32  
33  
34  
35  
36  
37  
38  
39  
40  
41  
42  
43  
44  
45  
46  
47  
48  
49  
50  
51  
52  
53  
54  
55  
56  
57  
58  
59  
60

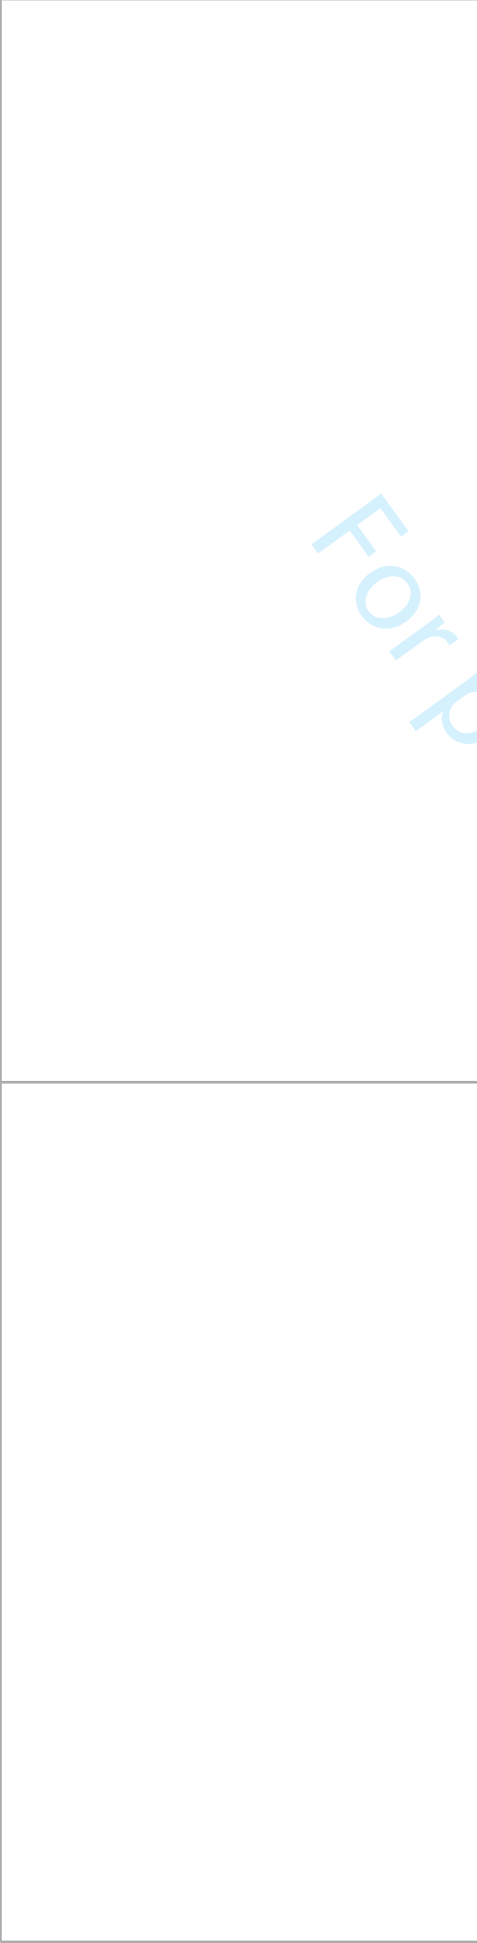

For peer review only

1  
2  
3  
4  
5  
6  
7  
8  
9  
10  
11  
12  
13  
14  
15  
16  
17  
18  
19  
20  
21  
22  
23  
24  
25  
26  
27  
28  
29  
30  
31  
32  
33  
34  
35  
36  
37  
38  
39  
40  
41  
42  
43  
44  
45  
46  
47  
48  
49  
50  
51  
52  
53  
54  
55  
56  
57  
58  
59  
60

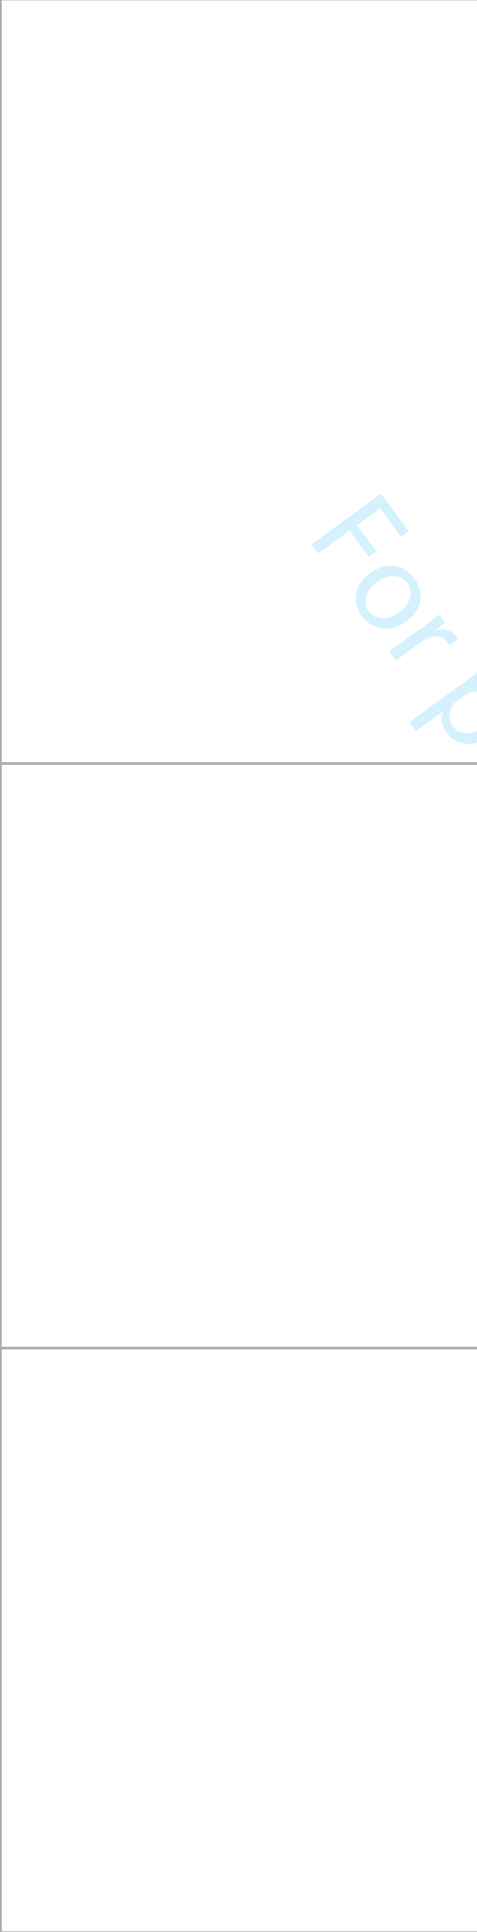

For peer review only



1  
2  
3  
4  
5  
6  
7  
8  
9  
10  
11  
12  
13  
14  
15  
16  
17  
18  
19  
20  
21  
22  
23  
24  
25  
26  
27  
28  
29  
30  
31  
32  
33  
34  
35  
36  
37  
38  
39  
40  
41  
42  
43  
44  
45  
46  
47  
48  
49  
50  
51  
52  
53  
54  
55  
56  
57  
58  
59  
60

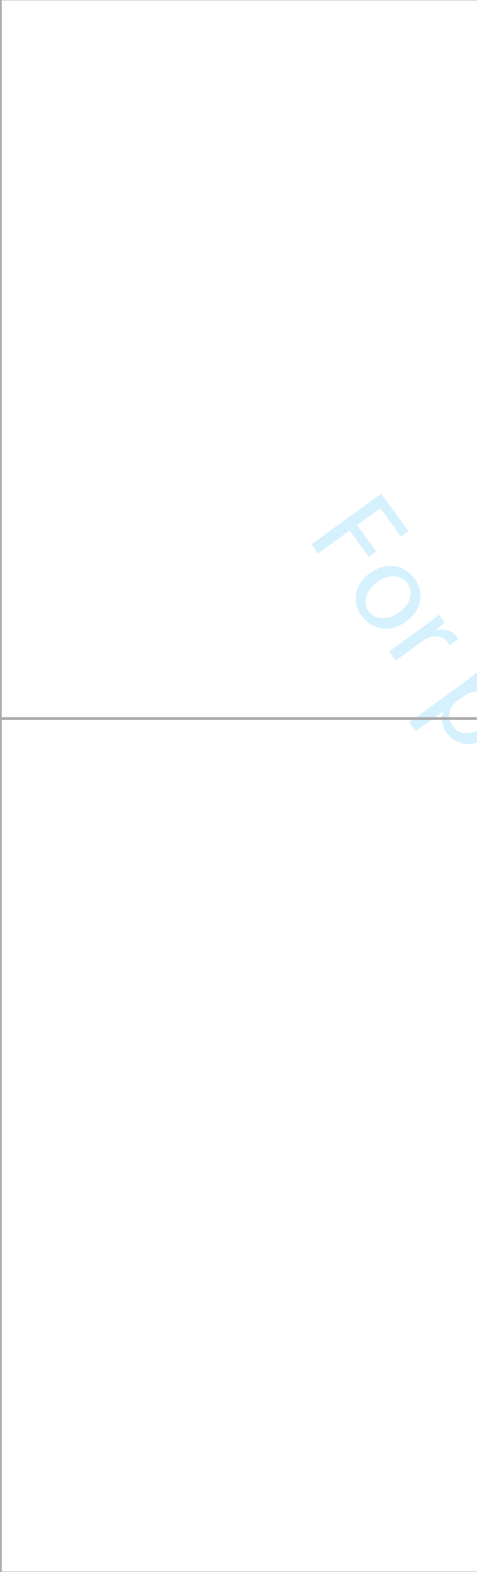

For peer review only

1  
2 Physicians felt pressure when  
3 request was made. Emotional  
4 drainn from performing MAID.  
5  
6  
7  
8  
9  
10  
11  
12  
13  
14  
15  
16  
17  
18  
19  
20  
21  
22  
23  
24  
25  
26  
27  
28  
29  
30  
31  
32  
33  
34  
35  
36  
37  
38  
39  
40  
41  
42  
43  
44  
45  
46  
47  
48  
49  
50  
51  
52  
53  
54  
55  
56  
57  
58  
59  
60

For peer review only

1  
2  
3  
4  
5  
6  
7  
8  
9  
10  
11  
12  
13  
14  
15  
16  
17  
18  
19  
20  
21  
22  
23  
24  
25  
26  
27  
28  
29  
30  
31  
32  
33  
34  
35  
36  
37  
38  
39  
40  
41  
42  
43  
44  
45  
46  
47  
48  
49  
50  
51  
52  
53  
54  
55  
56  
57  
58  
59  
60

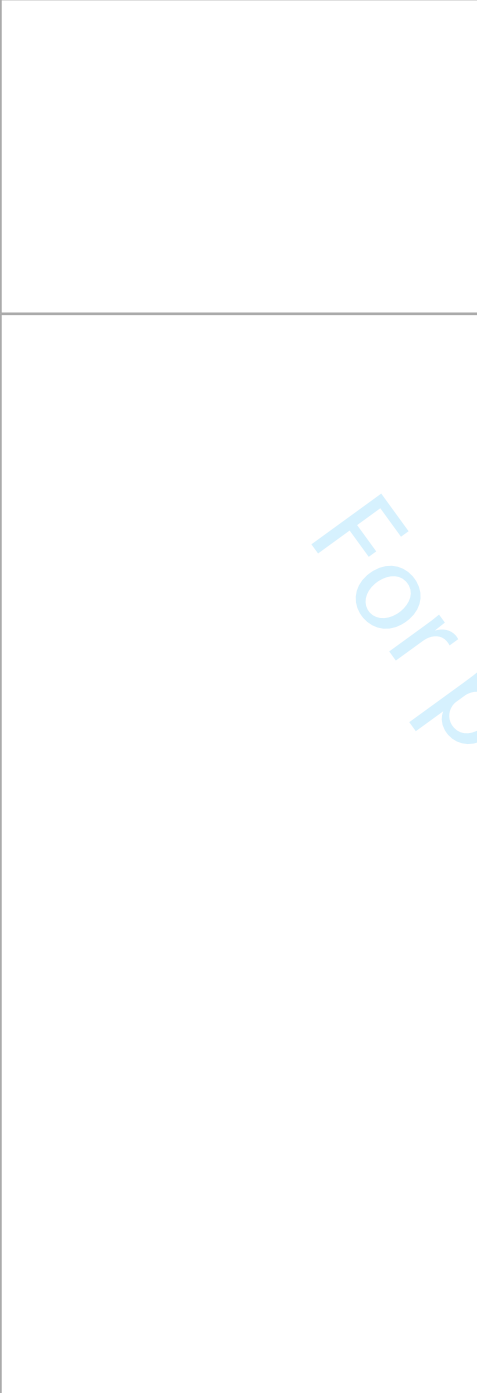

For peer review only

1  
2  
3  
4  
5  
6  
7  
8  
9  
10  
11  
12  
13  
14  
15  
16  
17  
18  
19  
20  
21  
22  
23  
24  
25  
26  
27  
28  
29  
30  
31  
32  
33  
34  
35  
36  
37  
38  
39  
40  
41  
42  
43  
44  
45  
46  
47  
48  
49  
50  
51  
52  
53  
54  
55  
56  
57  
58  
59  
60

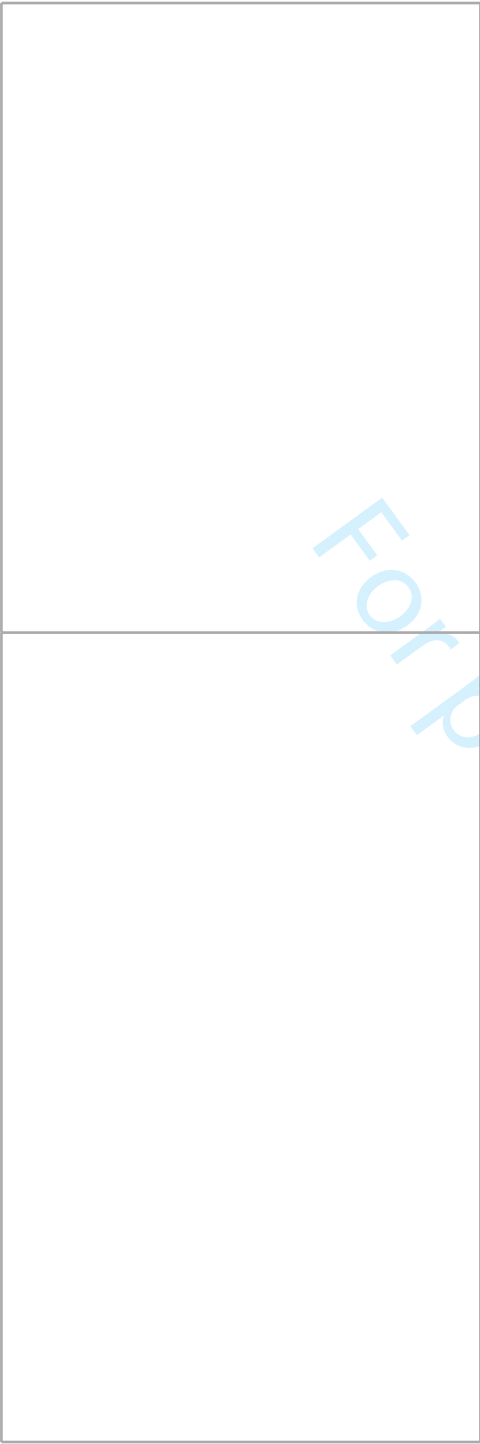



1  
2  
3  
4  
5  
6  
7  
8  
9  
10  
11  
12  
13  
14  
15  
16  
17  
18  
19  
20  
21  
22  
23  
24  
25  
26  
27  
28  
29  
30  
31  
32  
33  
34  
35  
36  
37  
38  
39  
40  
41  
42  
43  
44  
45  
46  
47  
48  
49  
50  
51  
52  
53  
54  
55  
56  
57  
58  
59  
60

Estimated time to unconsciousness;  
ranged from 36 to 55 seconds.

For peer review only

1  
2  
3  
4  
5  
6  
7  
8  
9  
10  
11  
12  
13  
14  
15  
16  
17  
18  
19  
20  
21  
22  
23  
24  
25  
26  
27  
28  
29  
30  
31  
32  
33  
34  
35  
36  
37  
38  
39  
40  
41  
42  
43  
44  
45  
46  
47  
48  
49  
50  
51  
52  
53  
54  
55  
56  
57  
58  
59  
60

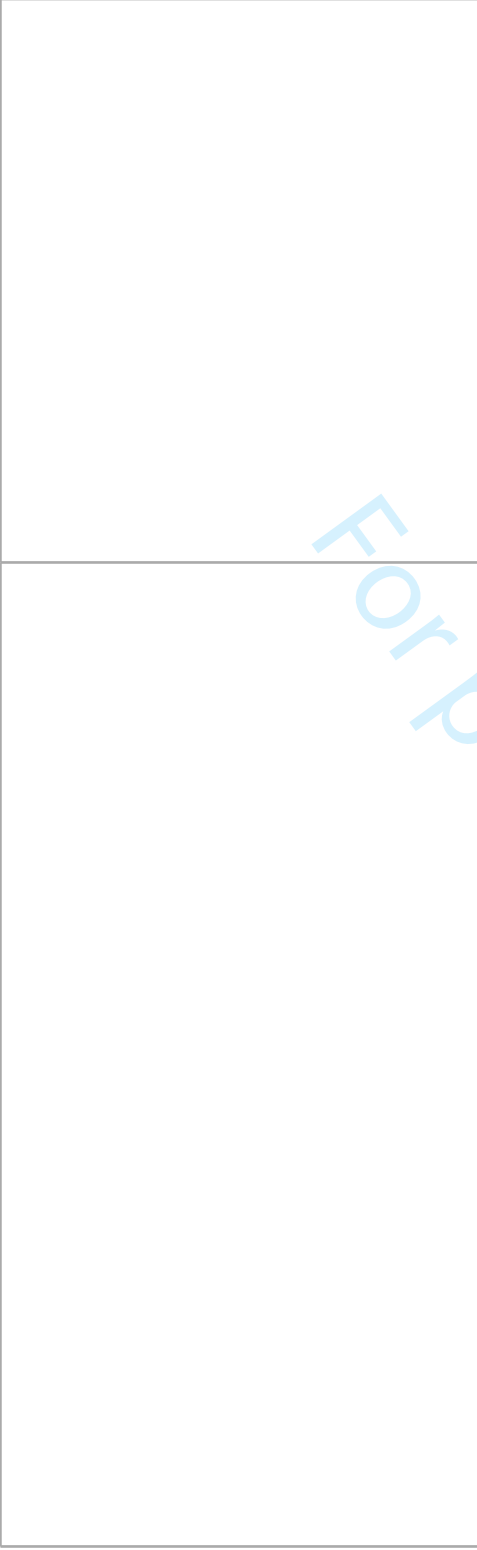

For peer review only

1  
2  
3  
4  
5  
6  
7  
8  
9  
10  
11  
12  
13  
14  
15  
16  
17  
18  
19  
20  
21  
22  
23  
24  
25  
26  
27  
28  
29  
30  
31  
32  
33  
34  
35  
36  
37  
38  
39  
40  
41  
42  
43  
44  
45  
46  
47  
48  
49  
50  
51  
52  
53  
54  
55  
56  
57  
58  
59  
60

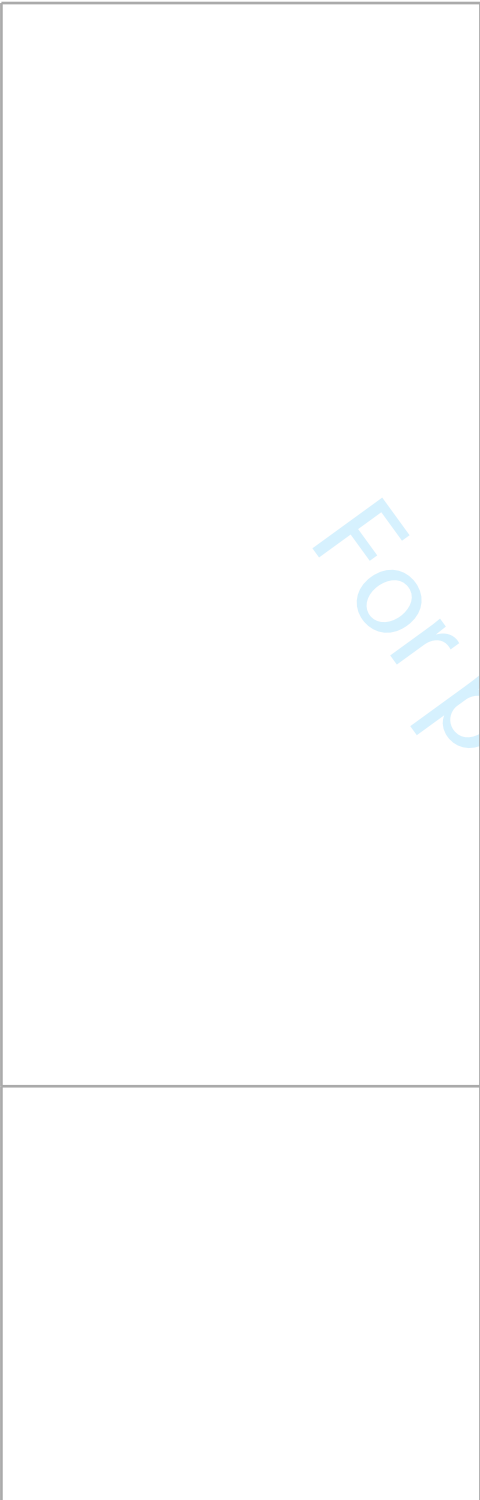

For peer review only



1  
2  
3  
4  
5  
6  
7  
8  
9  
10  
11  
12  
13  
14  
15  
16  
17  
18  
19  
20  
21  
22  
23  
24  
25  
26  
27  
28  
29  
30  
31  
32  
33  
34  
35  
36  
37  
38  
39  
40  
41  
42  
43  
44  
45  
46  
47  
48  
49  
50  
51  
52  
53  
54  
55  
56  
57  
58  
59  
60

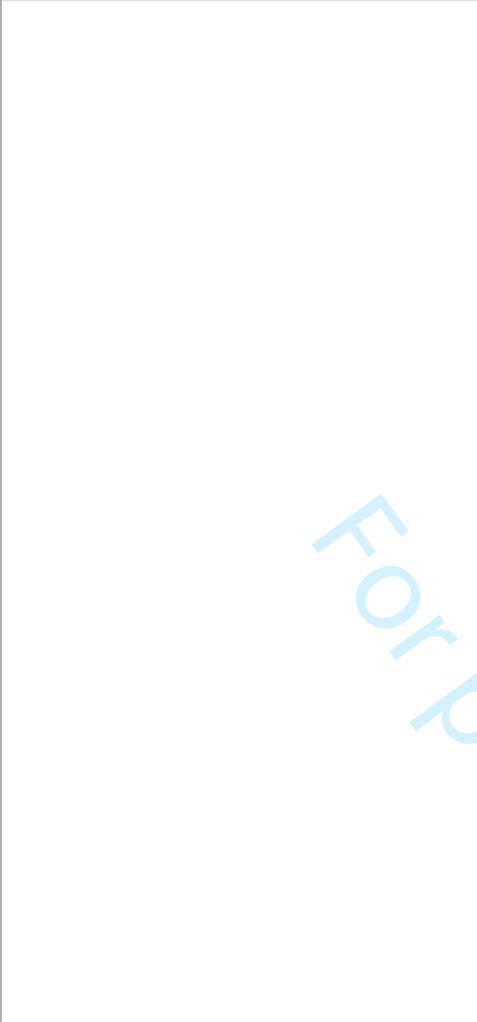

For peer review only

1  
2 86% of physicians dread the  
3 emotional burden of performing  
4 euthanasia (2011 survey, n = 1456)  
5  
6  
7  
8  
9  
10  
11  
12  
13  
14  
15  
16  
17  
18  
19  
20  
21  
22  
23  
24  
25  
26  
27  
28  
29  
30  
31  
32  
33  
34  
35  
36  
37  
38  
39  
40  
41  
42  
43  
44  
45  
46  
47  
48  
49  
50  
51  
52  
53  
54  
55  
56  
57  
58  
59  
60

For peer review only

1  
2  
3  
4  
5  
6  
7  
8  
9  
10  
11  
12  
13  
14  
15  
16  
17  
18  
19  
20  
21  
22  
23  
24  
25  
26  
27  
28  
29  
30  
31  
32  
33  
34  
35  
36  
37  
38  
39  
40  
41  
42  
43  
44  
45  
46  
47  
48  
49  
50  
51  
52  
53  
54  
55  
56  
57  
58  
59  
60

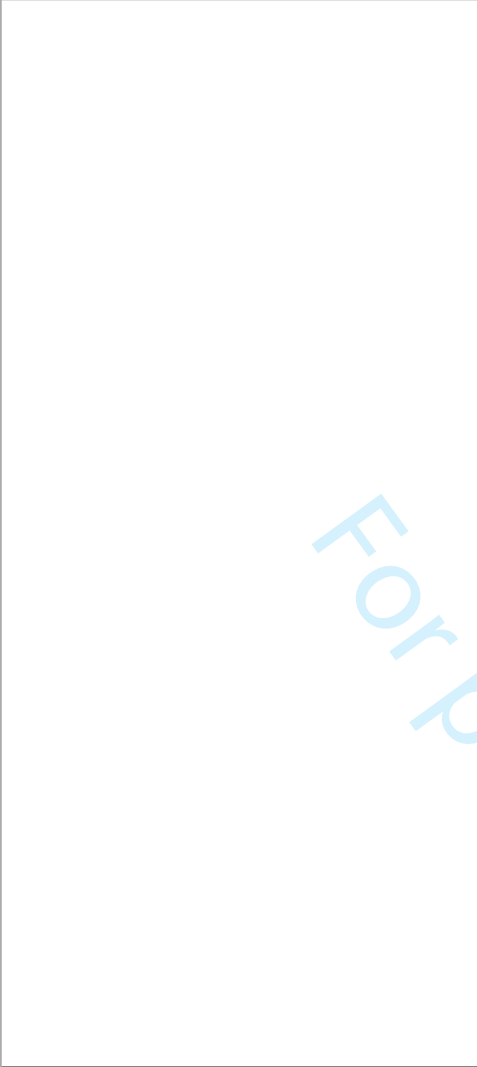

For peer review only



1  
2  
3  
4  
5  
6  
7  
8  
9  
10  
11  
12  
13  
14  
15  
16  
17  
18  
19  
20  
21  
22  
23  
24  
25  
26  
27  
28  
29  
30  
31  
32  
33  
34  
35  
36  
37  
38  
39  
40  
41  
42  
43  
44  
45  
46  
47  
48  
49  
50  
51  
52  
53  
54  
55  
56  
57  
58  
59  
60

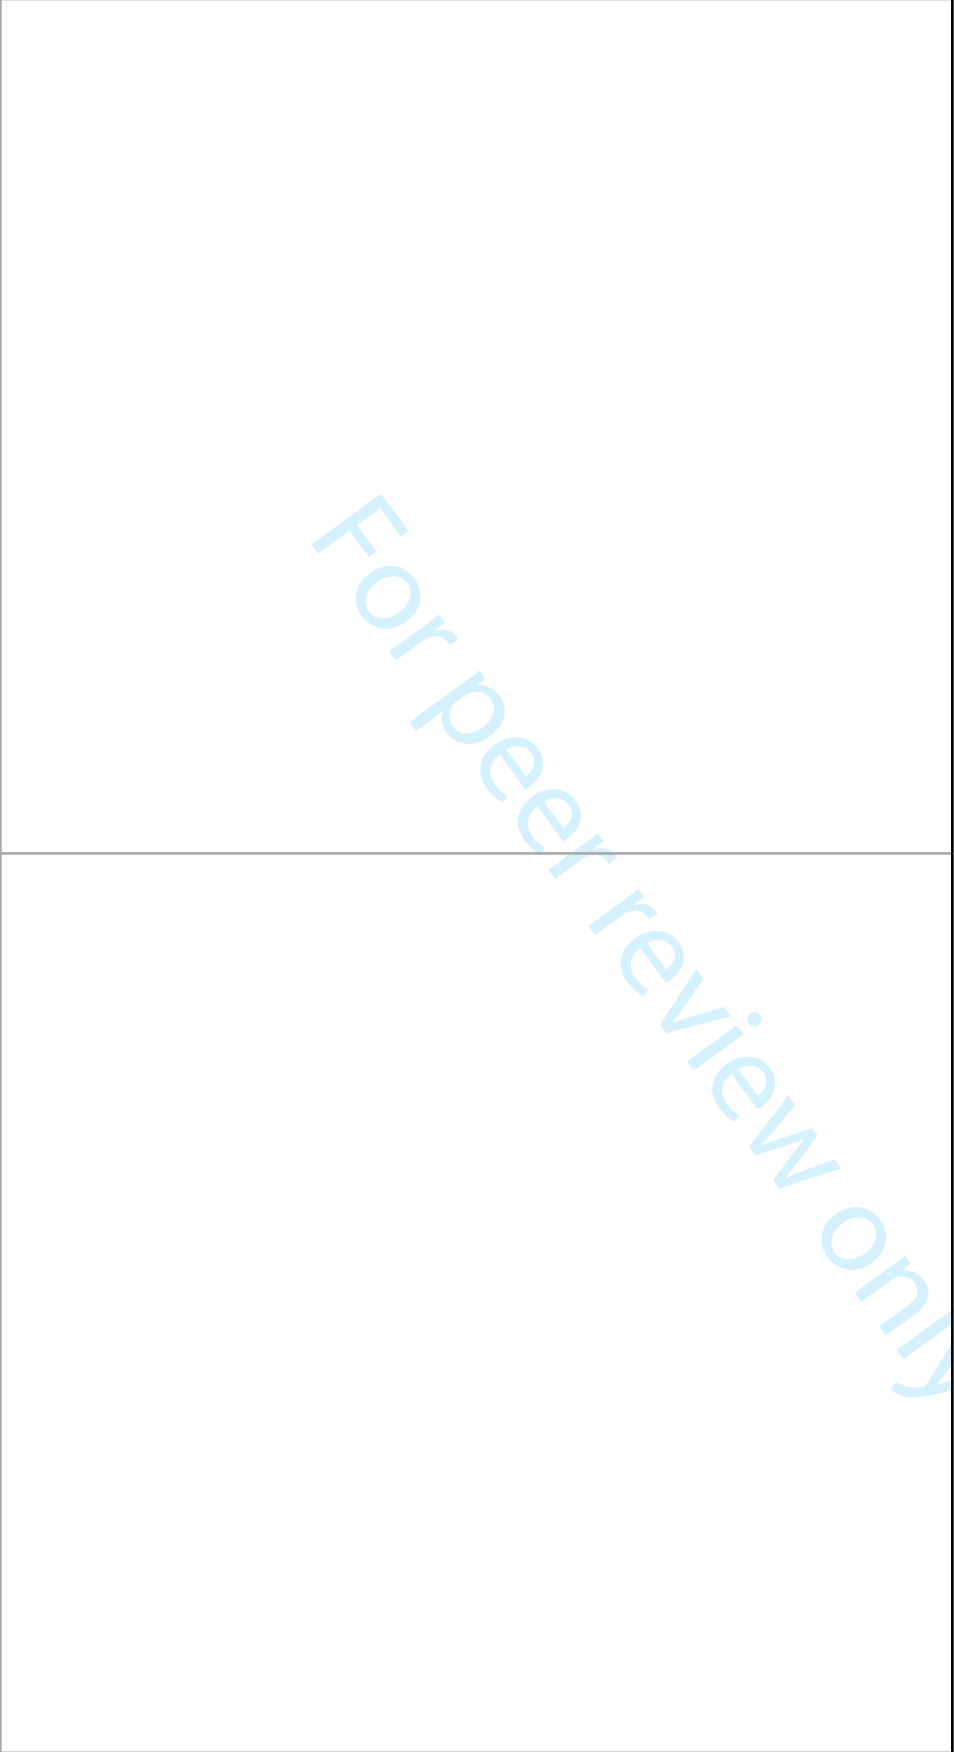

1  
2  
3  
4  
5  
6  
7  
8  
9  
10  
11  
12  
13  
14  
15  
16  
17  
18  
19  
20  
21  
22  
23  
24  
25  
26  
27  
28  
29  
30  
31  
32  
33  
34  
35  
36  
37  
38  
39  
40  
41  
42  
43  
44  
45  
46  
47  
48  
49  
50  
51  
52  
53  
54  
55  
56  
57  
58  
59  
60

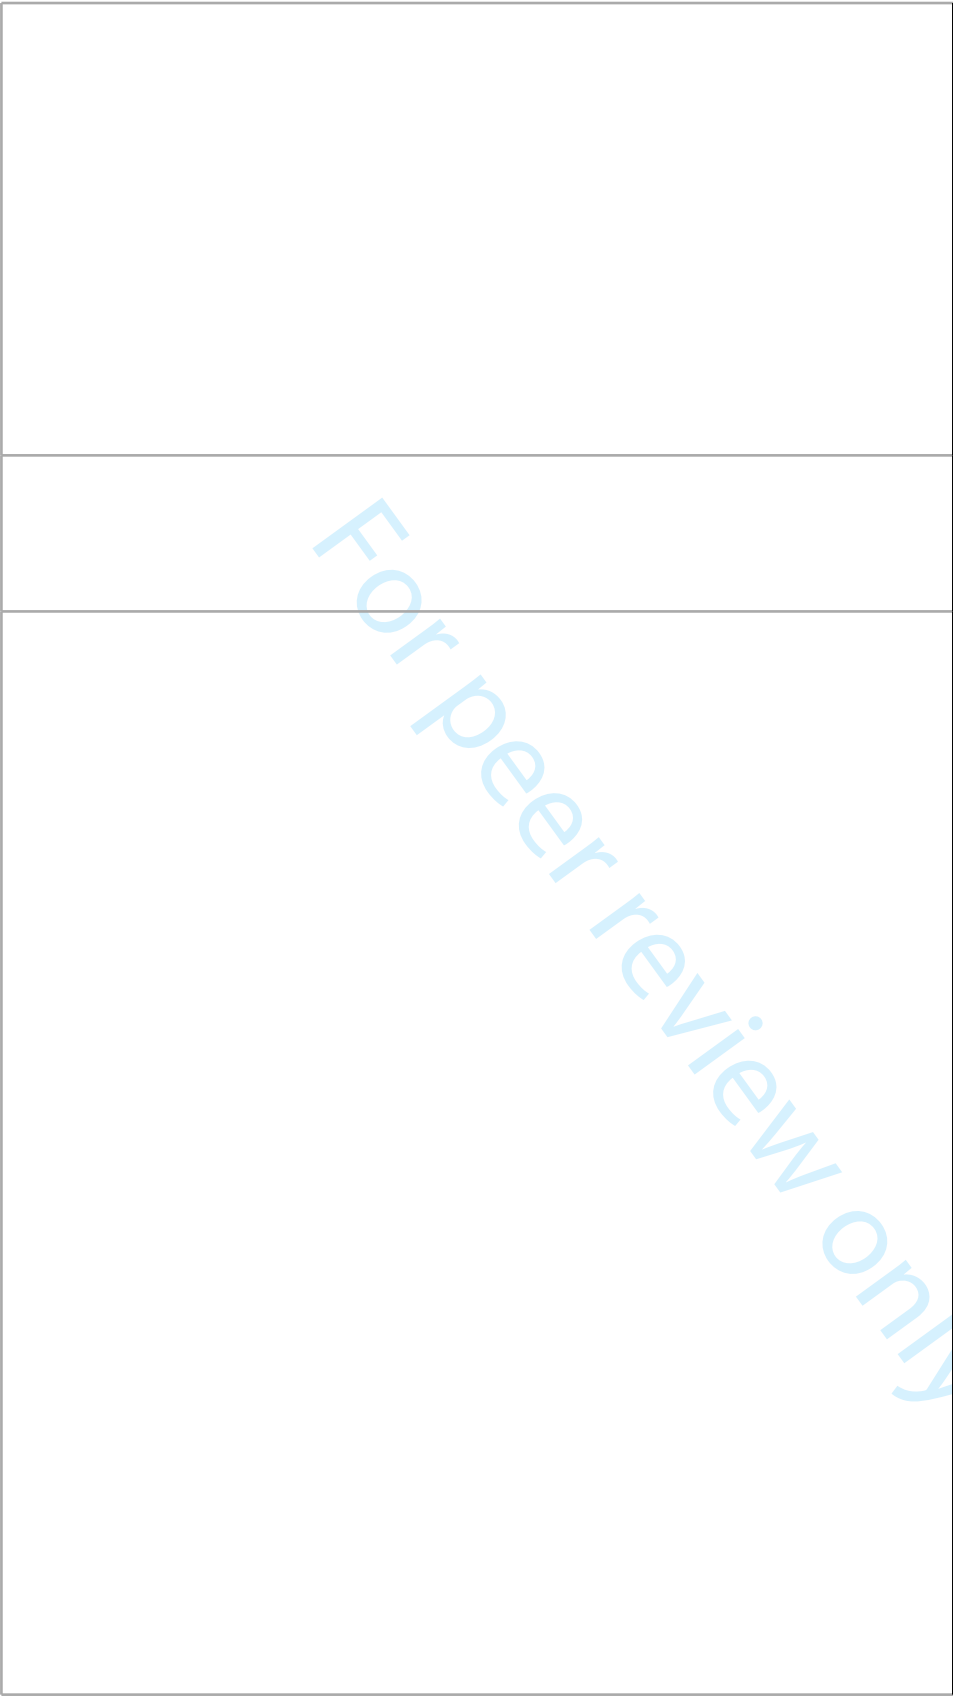

1  
2  
3  
4  
5  
6  
7  
8  
9  
10  
11  
12  
13  
14  
15  
16  
17  
18  
19  
20  
21  
22  
23  
24  
25  
26  
27  
28  
29  
30  
31  
32  
33  
34  
35  
36  
37  
38  
39  
40  
41  
42  
43  
44  
45  
46  
47  
48  
49  
50  
51  
52  
53  
54  
55  
56  
57  
58  
59  
60

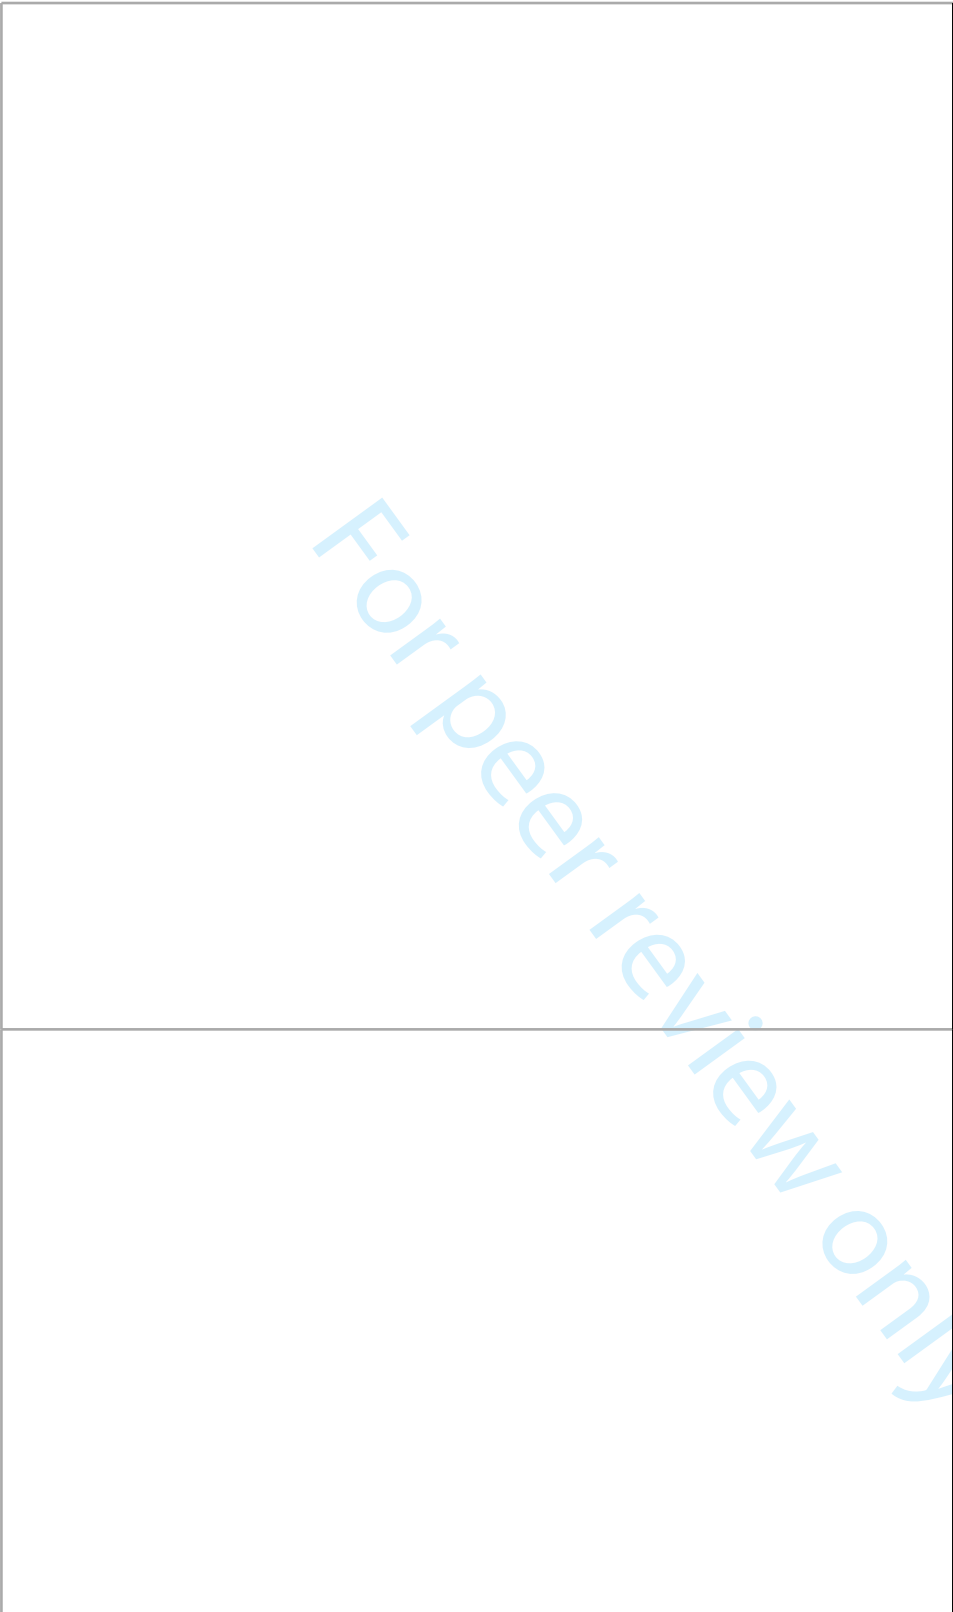

1  
2  
3  
4  
5  
6  
7  
8  
9  
10  
11  
12  
13  
14  
15  
16  
17  
18  
19  
20  
21  
22  
23  
24  
25  
26  
27  
28  
29  
30  
31  
32  
33  
34  
35  
36  
37  
38  
39  
40  
41  
42  
43  
44  
45  
46  
47  
48  
49  
50  
51  
52  
53  
54  
55  
56  
57  
58  
59  
60

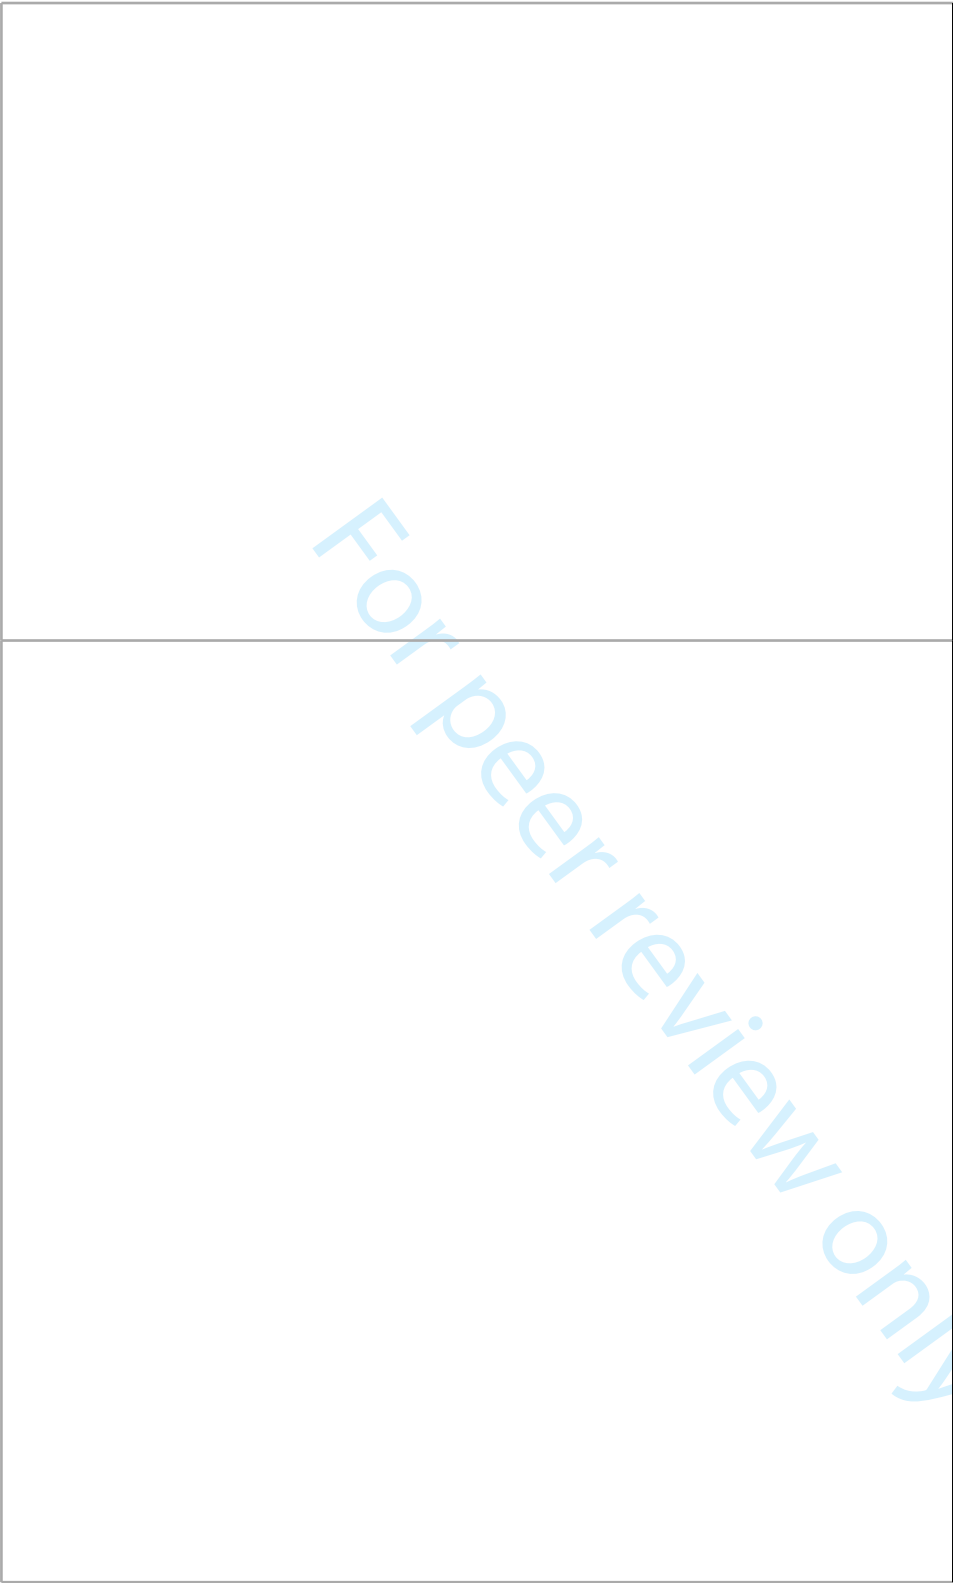



1  
2  
3  
4  
5  
6  
7  
8  
9  
10  
11  
12  
13  
14  
15  
16  
17  
18  
19  
20  
21  
22  
23  
24  
25  
26  
27  
28  
29  
30  
31  
32  
33  
34  
35  
36  
37  
38  
39  
40  
41  
42  
43  
44  
45  
46  
47  
48  
49  
50  
51  
52  
53  
54  
55  
56  
57  
58  
59  
60

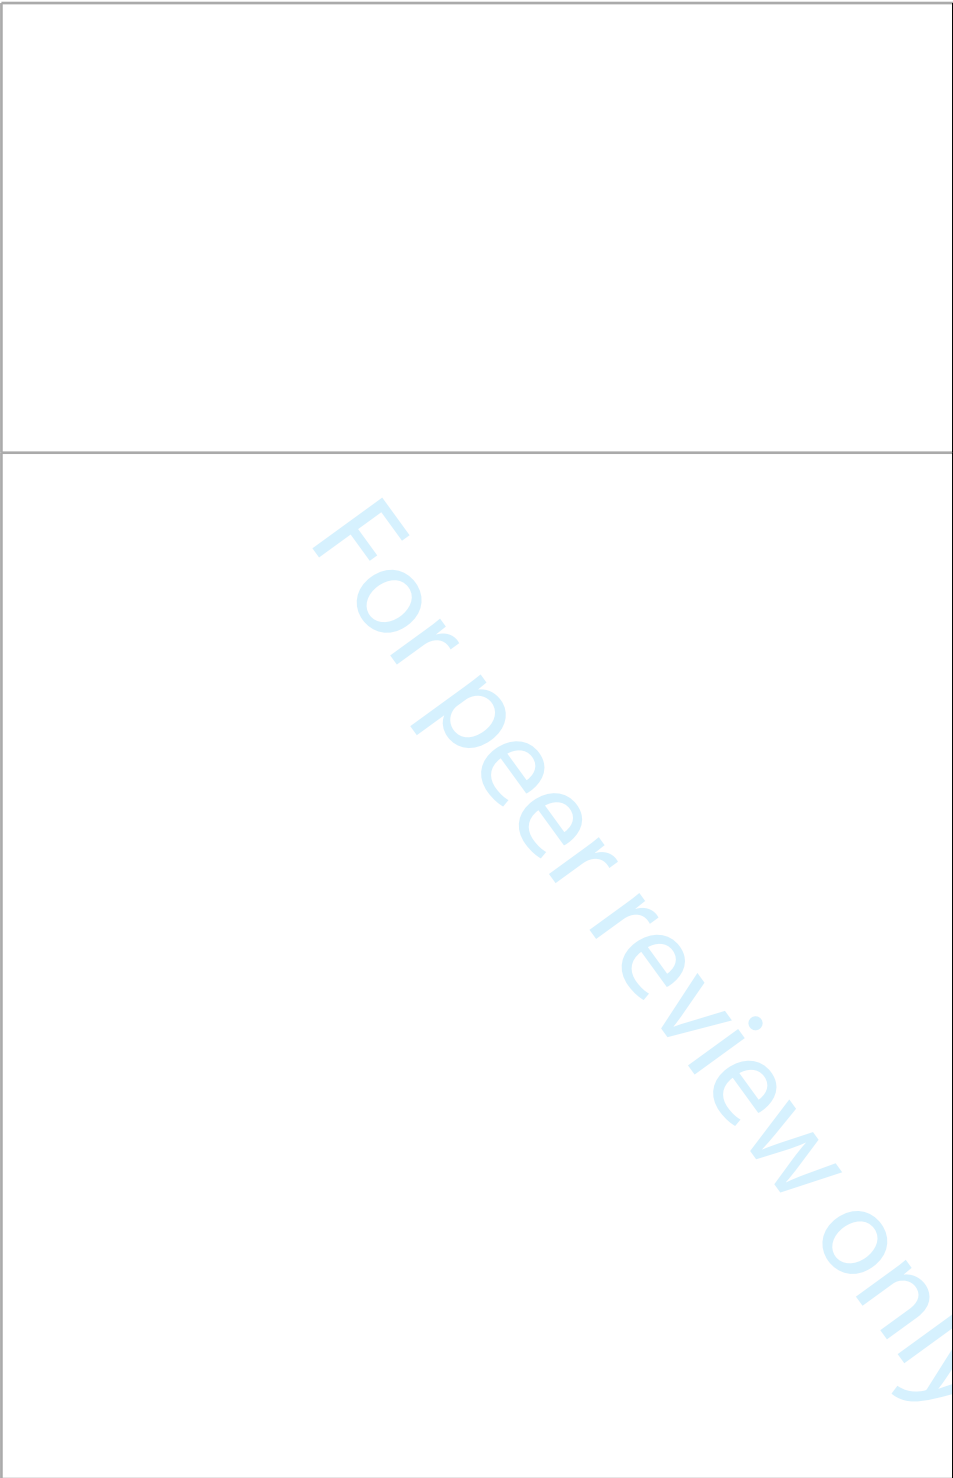



1  
2  
3  
4  
5  
6  
7  
8  
9  
10  
11  
12  
13  
14  
15  
16  
17  
18  
19  
20  
21  
22  
23  
24  
25  
26  
27  
28  
29  
30  
31  
32  
33  
34  
35  
36  
37  
38  
39  
40  
41  
42  
43  
44  
45  
46  
47  
48  
49  
50  
51  
52  
53  
54  
55  
56  
57  
58  
59  
60

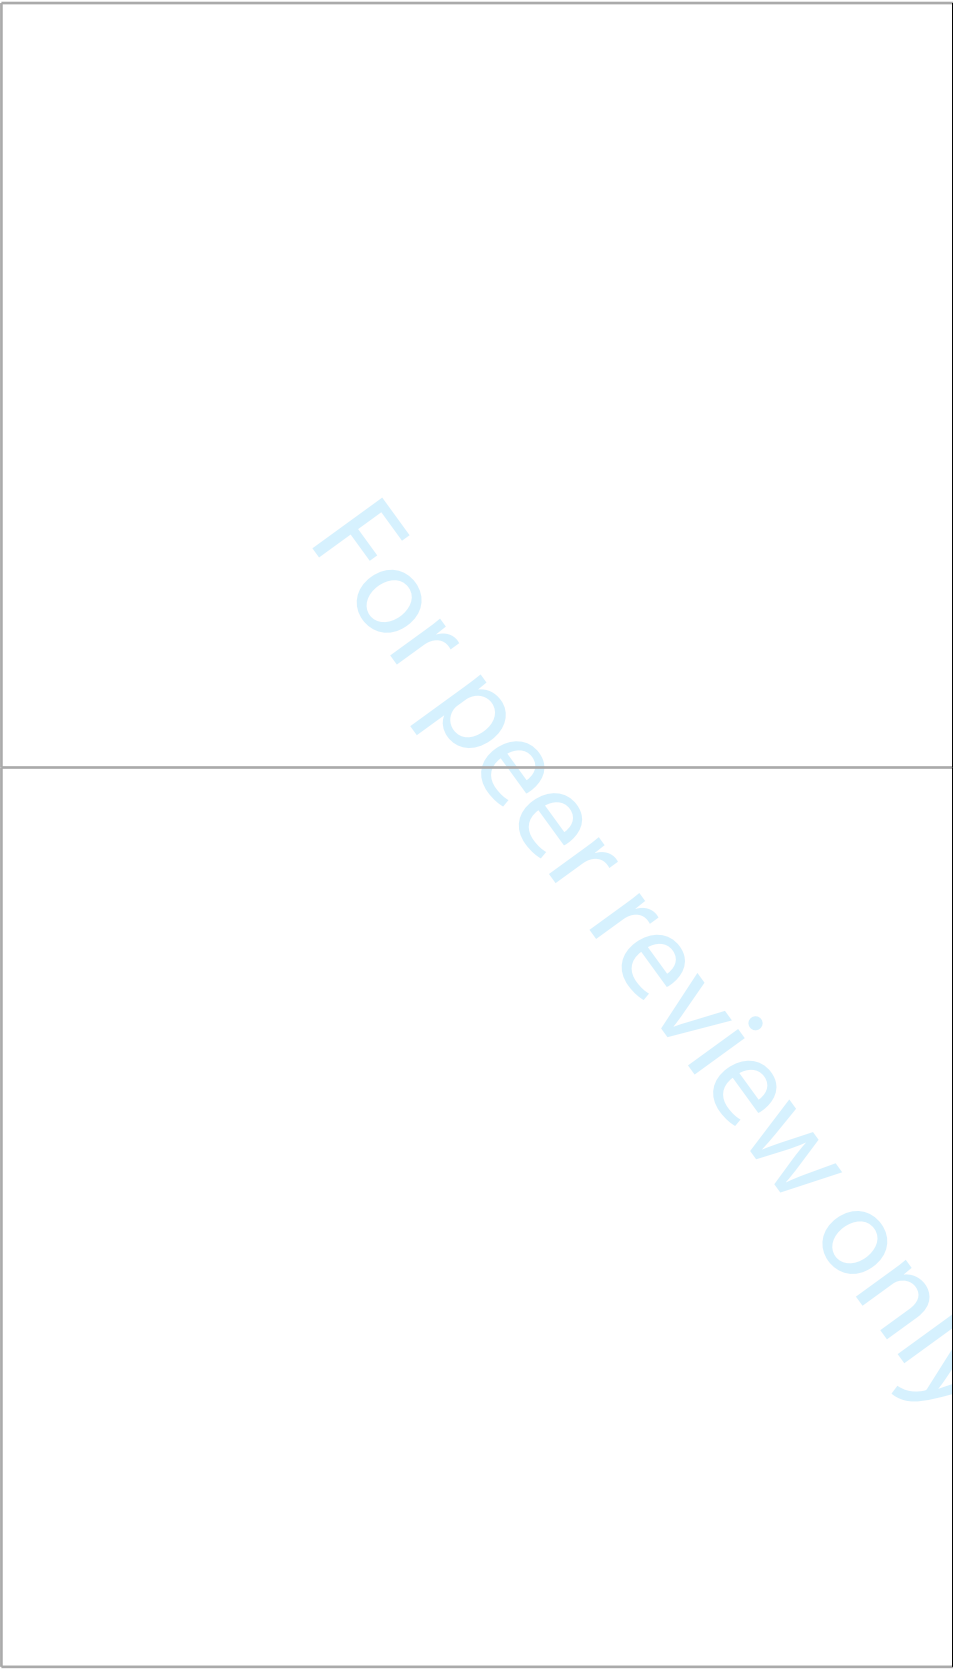

1  
2  
3  
4  
5  
6  
7  
8  
9  
10  
11  
12  
13  
14  
15  
16  
17  
18  
19  
20  
21  
22  
23  
24  
25  
26  
27  
28  
29  
30  
31  
32  
33  
34  
35  
36  
37  
38  
39  
40  
41  
42  
43  
44  
45  
46  
47  
48  
49  
50  
51  
52  
53  
54  
55  
56  
57  
58  
59  
60

|  |
|--|
|  |
|  |
|  |

For peer review only





1  
2  
3  
4  
5  
6  
7  
8  
9  
10  
11  
12  
13  
14  
15  
16  
17  
18  
19  
20  
21  
22  
23  
24  
25  
26  
27  
28  
29  
30  
31  
32  
33  
34  
35  
36  
37  
38  
39  
40  
41  
42  
43  
44  
45  
46  
47  
48  
49  
50  
51  
52  
53  
54  
55  
56  
57  
58  
59  
60

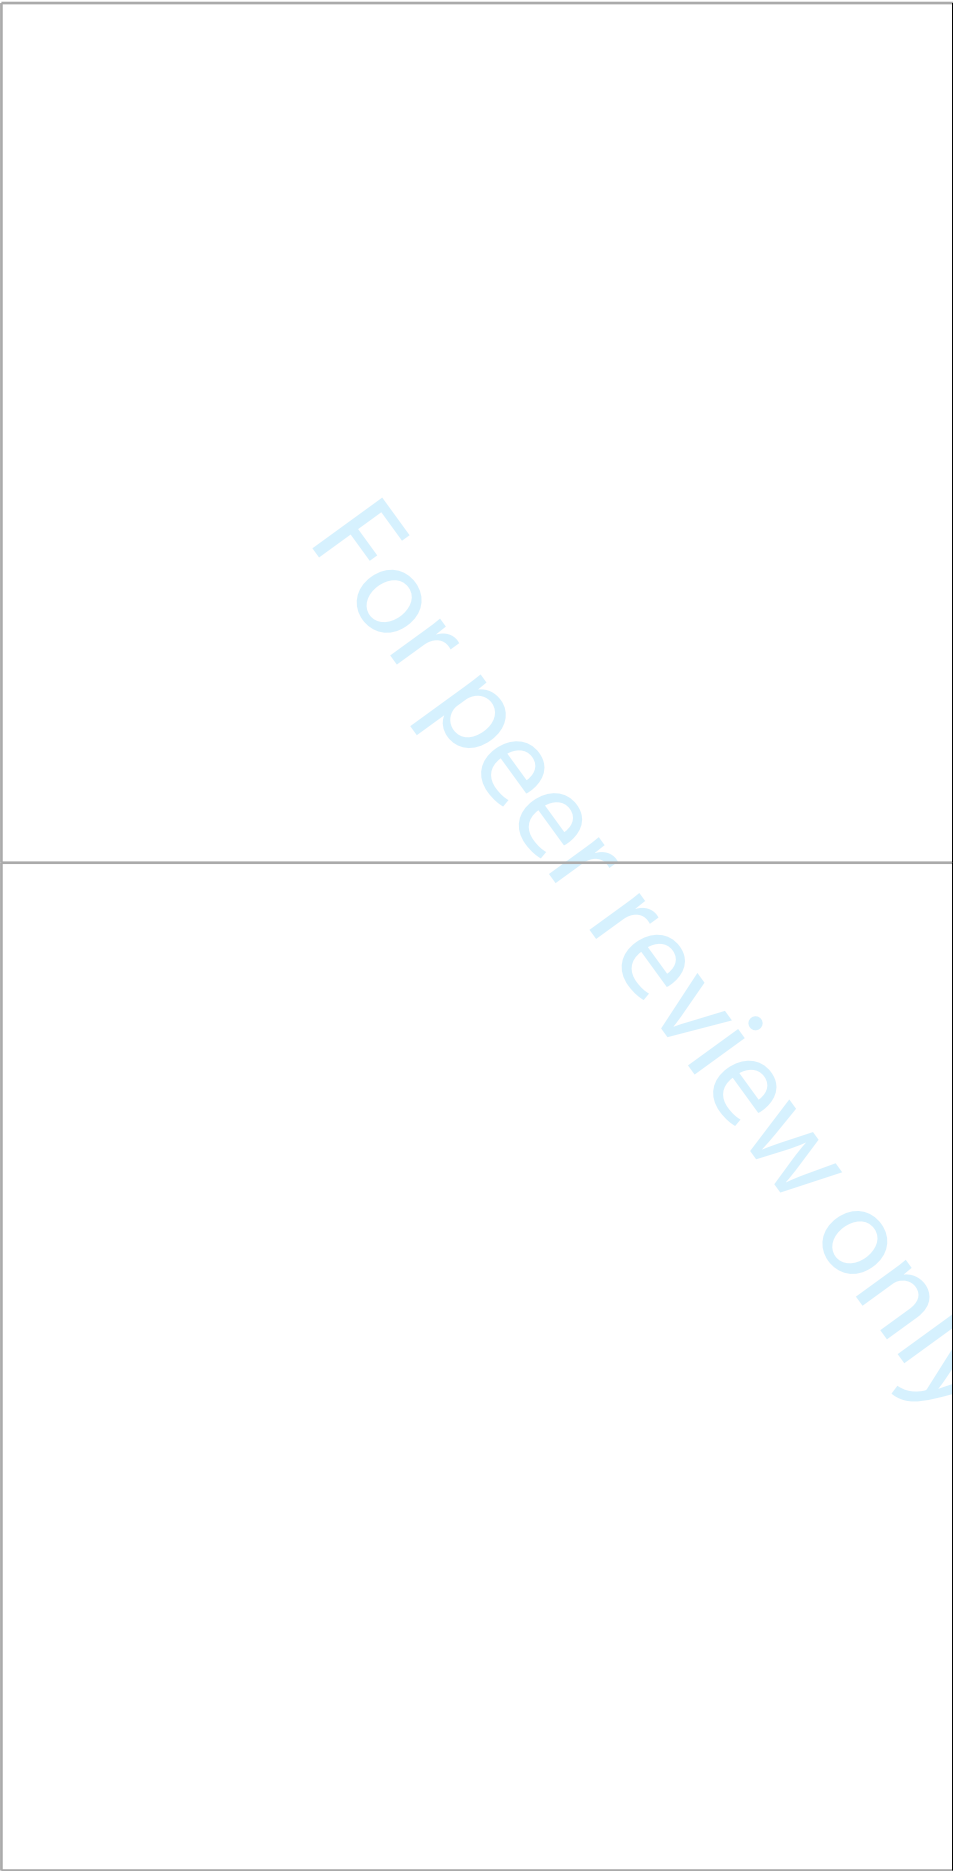

1  
2  
3  
4  
5  
6  
7  
8  
9  
10  
11  
12  
13  
14  
15  
16  
17  
18  
19  
20  
21  
22  
23  
24  
25  
26  
27  
28  
29  
30  
31  
32  
33  
34  
35  
36  
37  
38  
39  
40  
41  
42  
43  
44  
45  
46  
47  
48  
49  
50  
51  
52  
53  
54  
55  
56  
57  
58  
59  
60

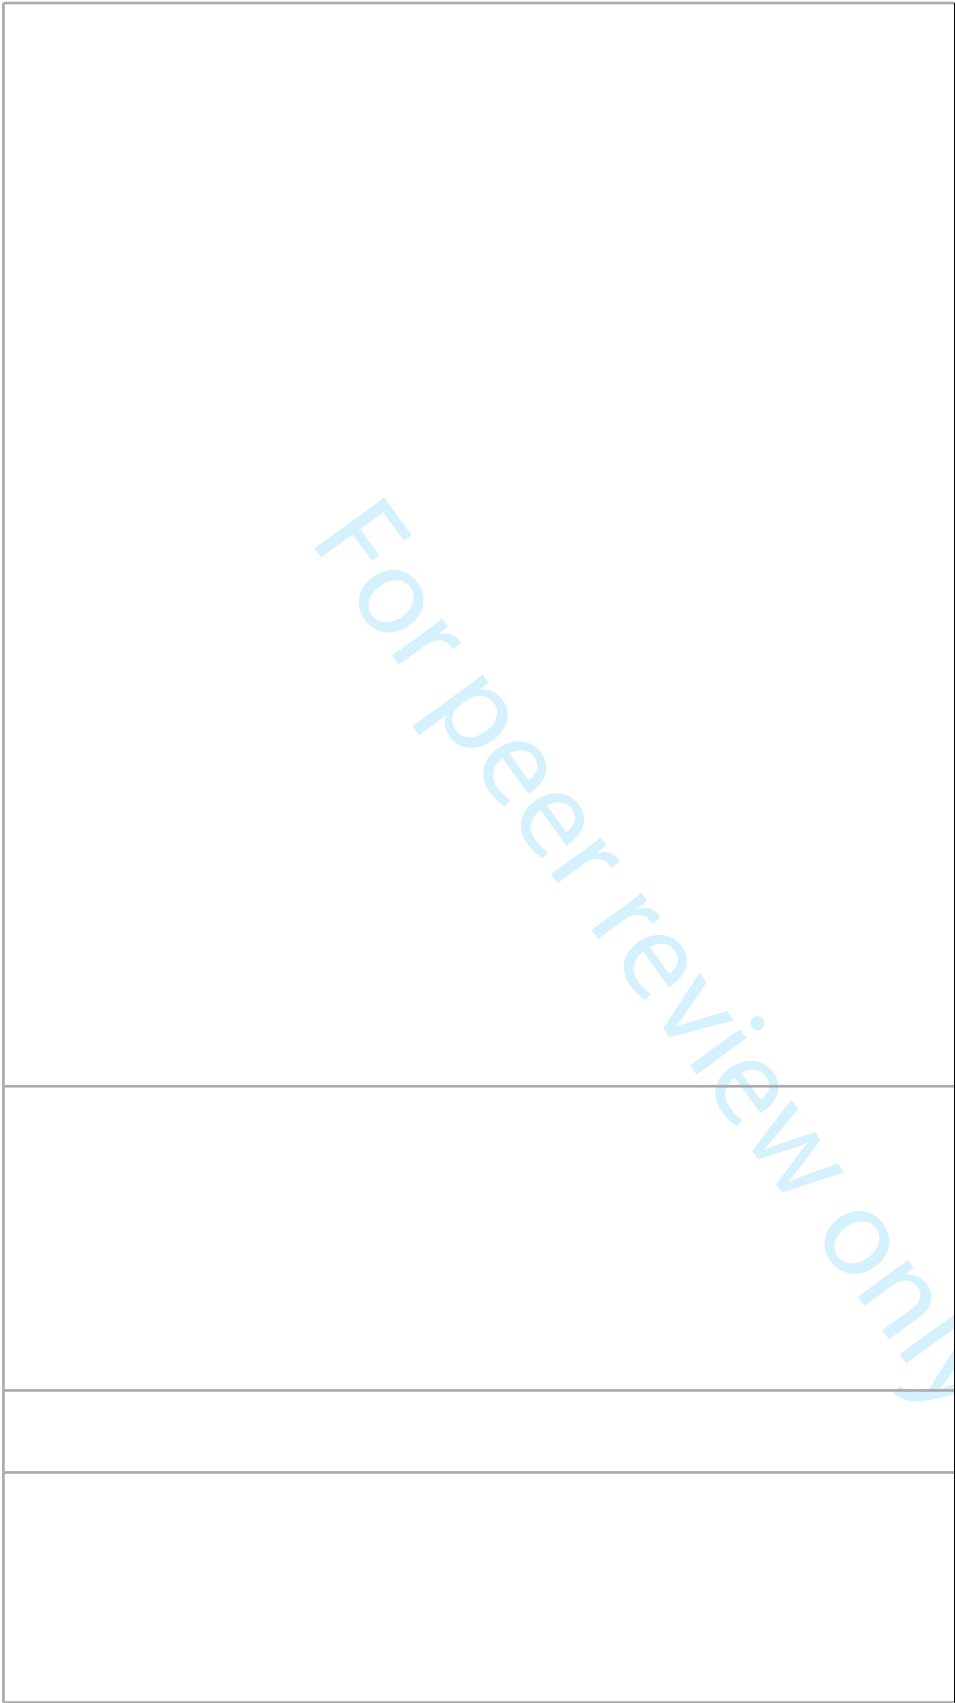



1  
2  
3  
4  
5  
6  
7  
8  
9  
10  
11  
12  
13  
14  
15  
16  
17  
18  
19  
20  
21  
22  
23  
24  
25  
26  
27  
28  
29  
30  
31  
32  
33  
34  
35  
36  
37  
38  
39  
40  
41  
42  
43  
44  
45  
46  
47  
48  
49  
50  
51  
52  
53  
54  
55  
56  
57  
58  
59  
60



1  
2  
3  
4  
5  
6  
7  
8  
9  
10  
11  
12  
13  
14  
15  
16  
17  
18  
19  
20  
21  
22  
23  
24  
25  
26  
27  
28  
29  
30  
31  
32  
33  
34  
35  
36  
37  
38  
39  
40  
41  
42  
43  
44  
45  
46  
47  
48  
49  
50  
51  
52  
53  
54  
55  
56  
57  
58  
59  
60

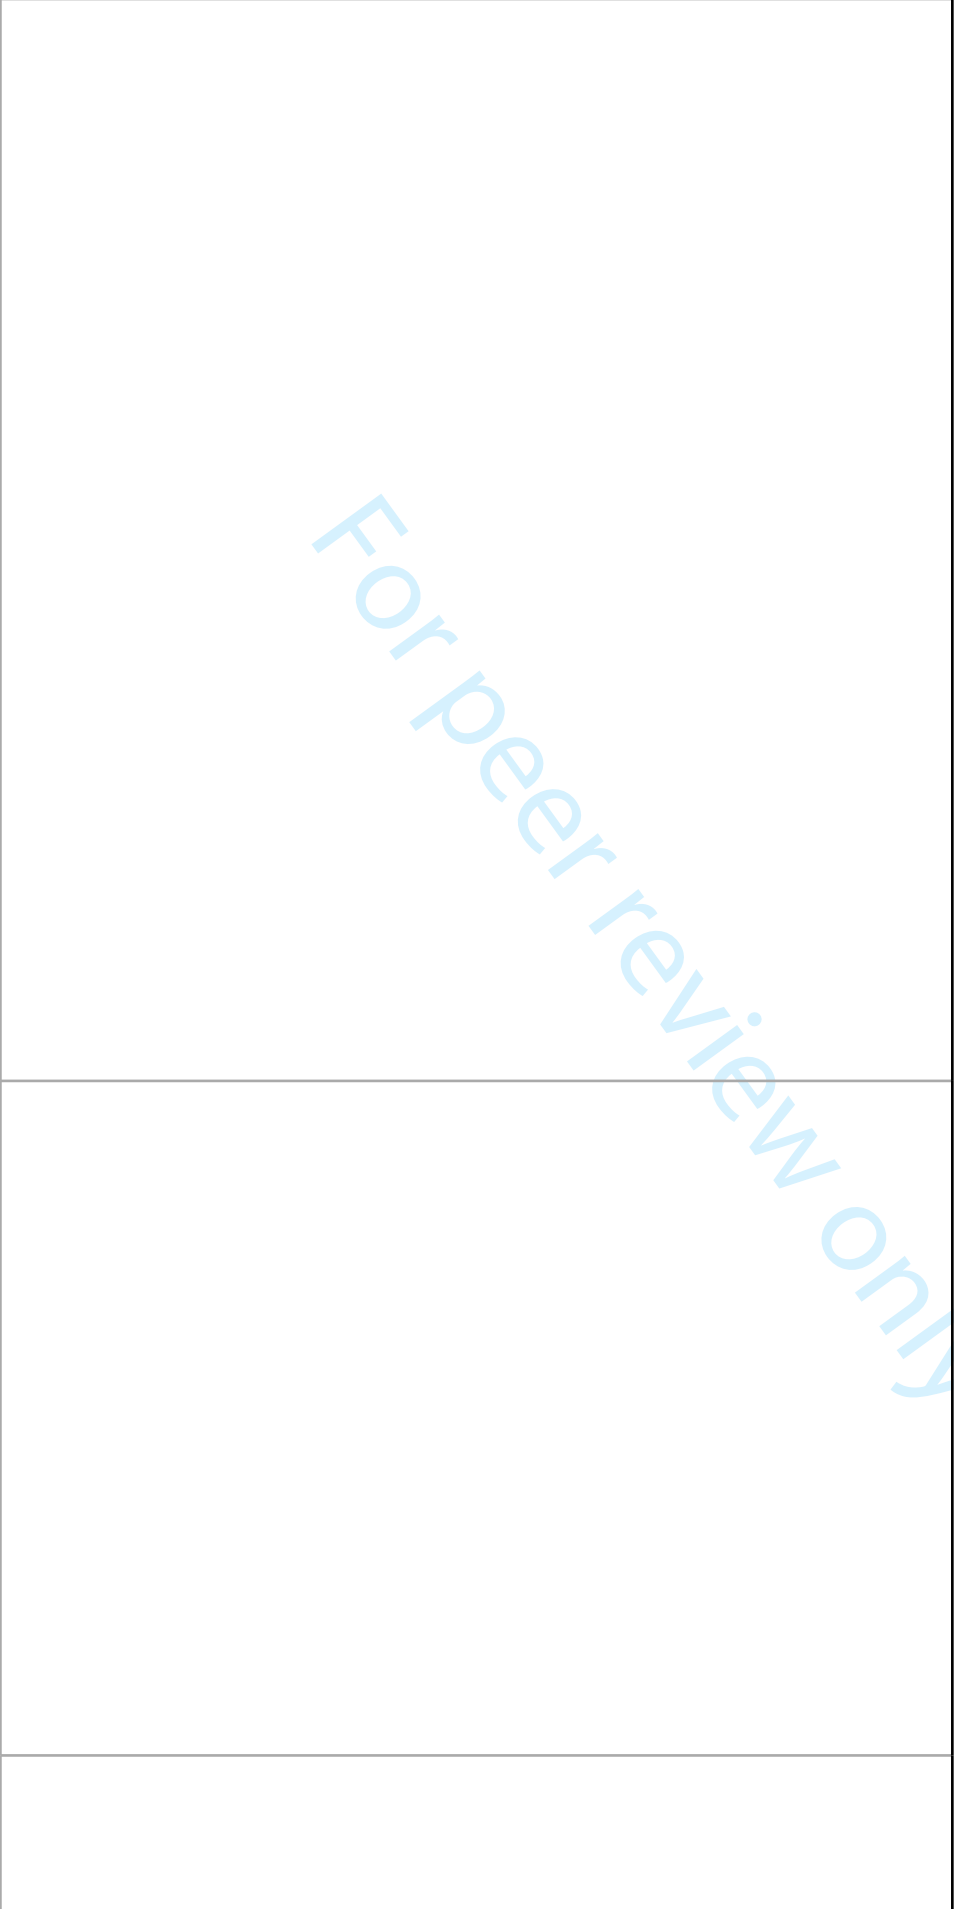



1  
2  
3  
4  
5  
6  
7  
8  
9  
10  
11  
12  
13  
14  
15  
16  
17  
18  
19  
20  
21  
22  
23  
24  
25  
26  
27  
28  
29  
30  
31  
32  
33  
34  
35  
36  
37  
38  
39  
40  
41  
42  
43  
44  
45  
46  
47  
48  
49  
50  
51  
52  
53  
54  
55  
56  
57  
58  
59  
60

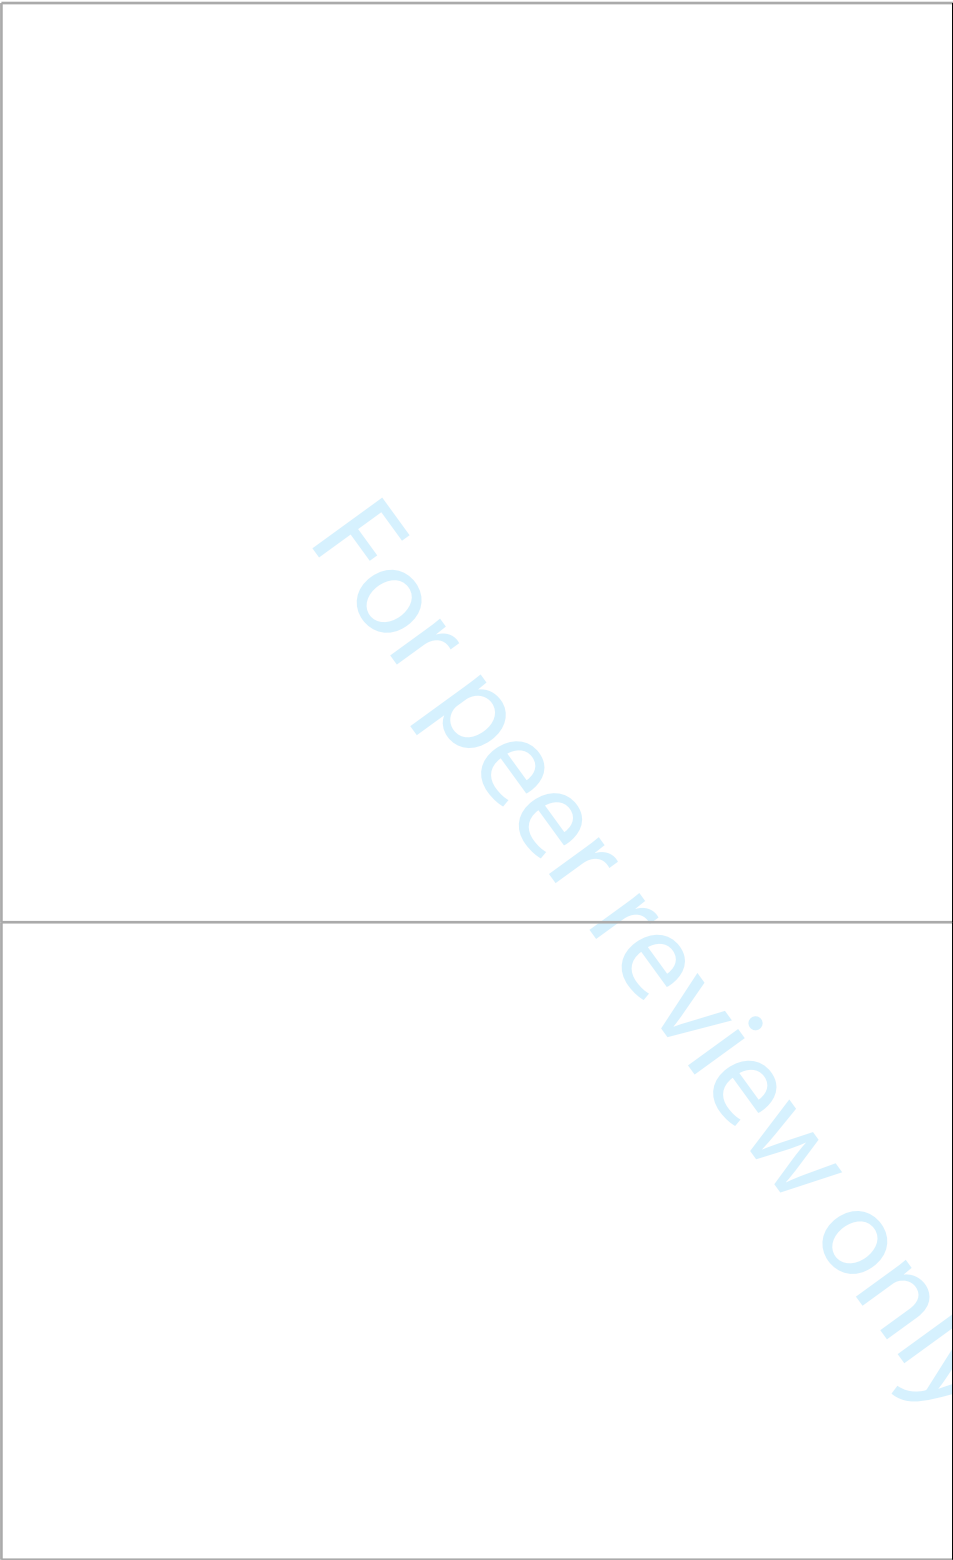

1  
2  
3  
4  
5  
6  
7  
8  
9  
10  
11  
12  
13  
14  
15  
16  
17  
18  
19  
20  
21  
22  
23  
24  
25  
26  
27  
28  
29  
30  
31  
32  
33  
34  
35  
36  
37  
38  
39  
40  
41  
42  
43  
44  
45  
46  
47  
48  
49  
50  
51  
52  
53  
54  
55  
56  
57  
58  
59  
60

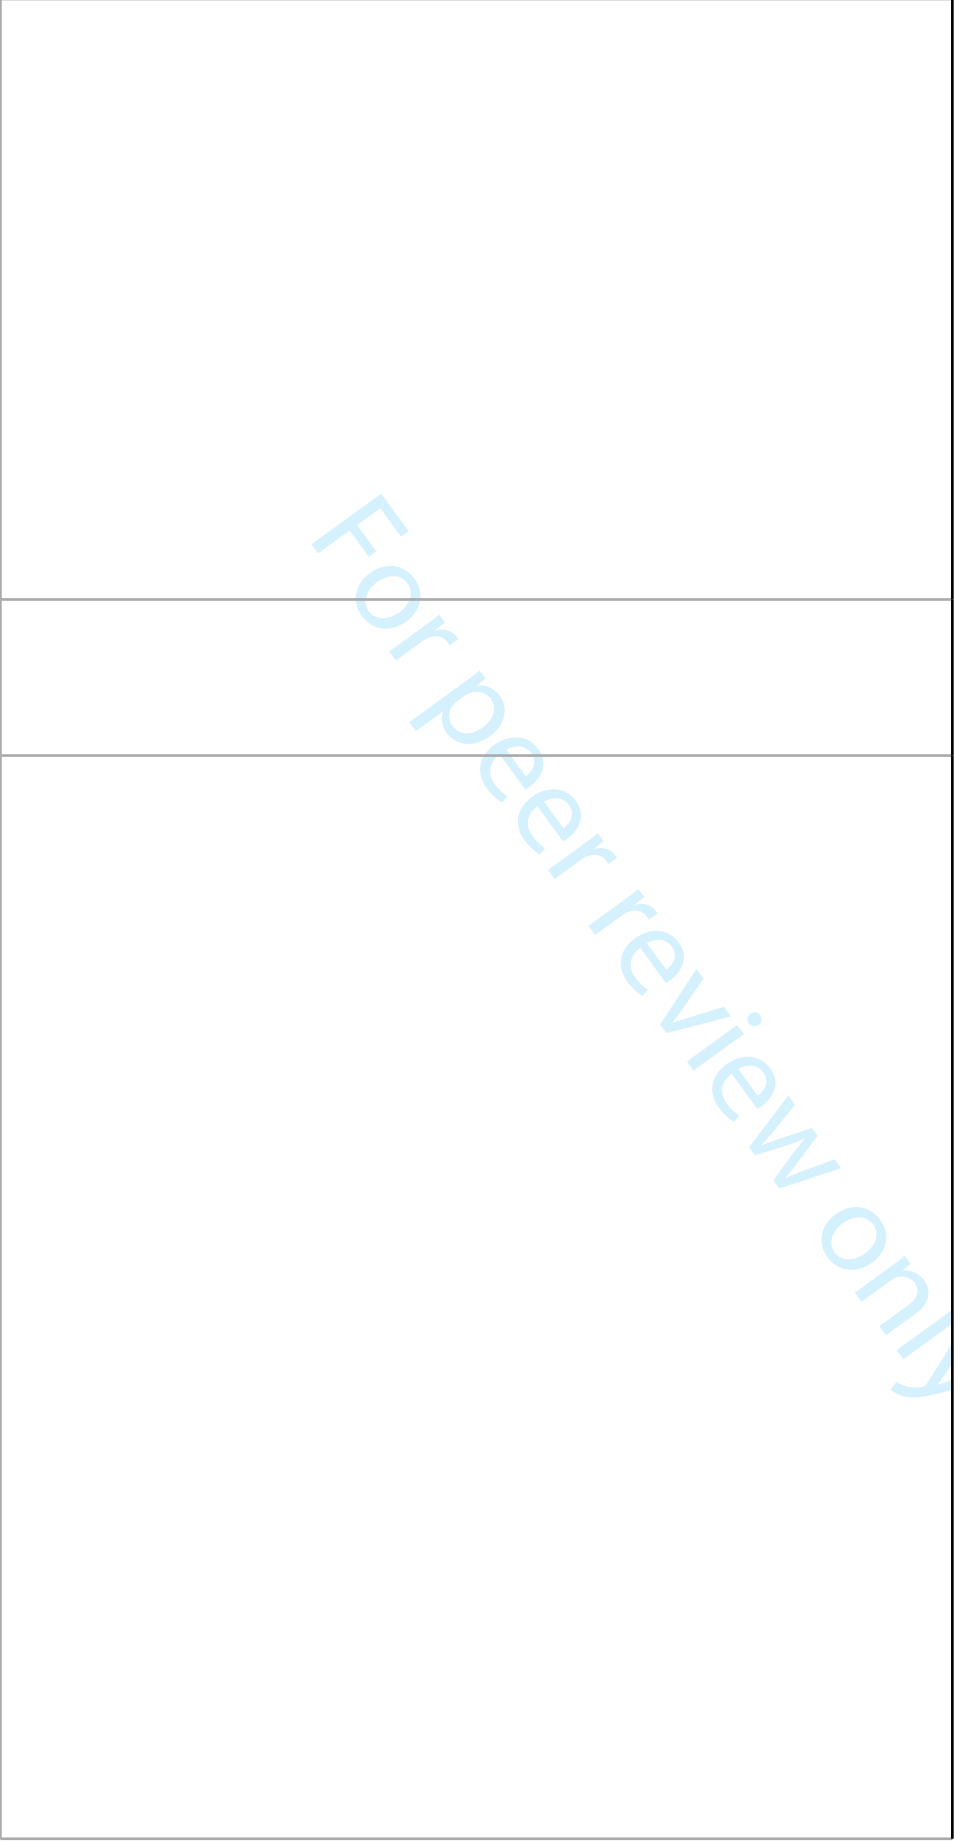

1  
2  
3  
4  
5  
6  
7  
8  
9  
10  
11  
12  
13  
14  
15  
16  
17  
18  
19  
20  
21  
22  
23  
24  
25  
26  
27  
28  
29  
30  
31  
32  
33  
34  
35  
36  
37  
38  
39  
40  
41  
42  
43  
44  
45  
46  
47  
48  
49  
50  
51  
52  
53  
54  
55  
56  
57  
58  
59  
60

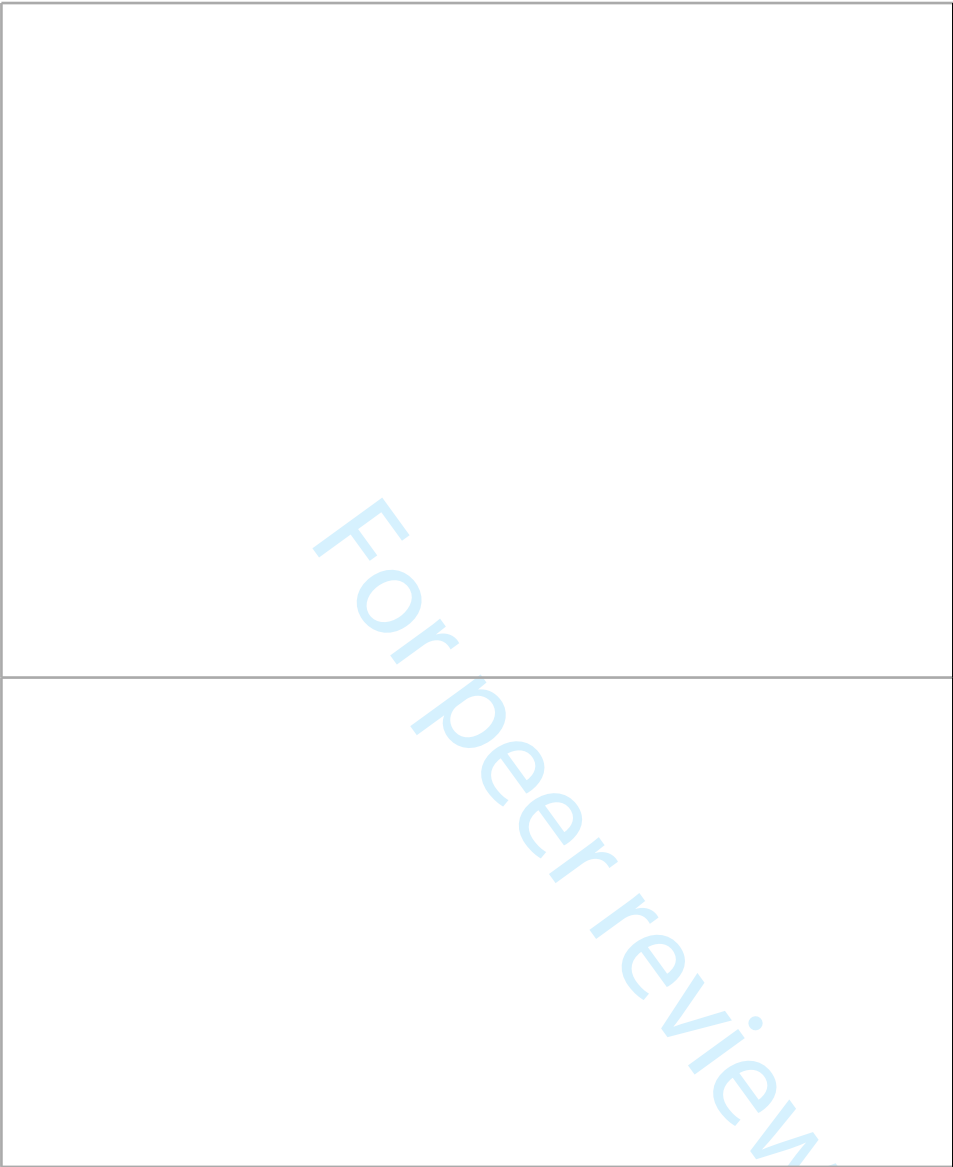

For peer review only

1  
2  
3  
4  
5  
6  
7  
8  
9  
10  
11  
12  
13  
14  
15  
16  
17  
18  
19  
20  
21  
22  
23  
24  
25  
26  
27  
28  
29  
30  
31  
32  
33  
34  
35  
36  
37  
38  
39  
40  
41  
42  
43  
44  
45  
46  
47  
48  
49  
50  
51  
52  
53  
54  
55  
56  
57  
58  
59  
60

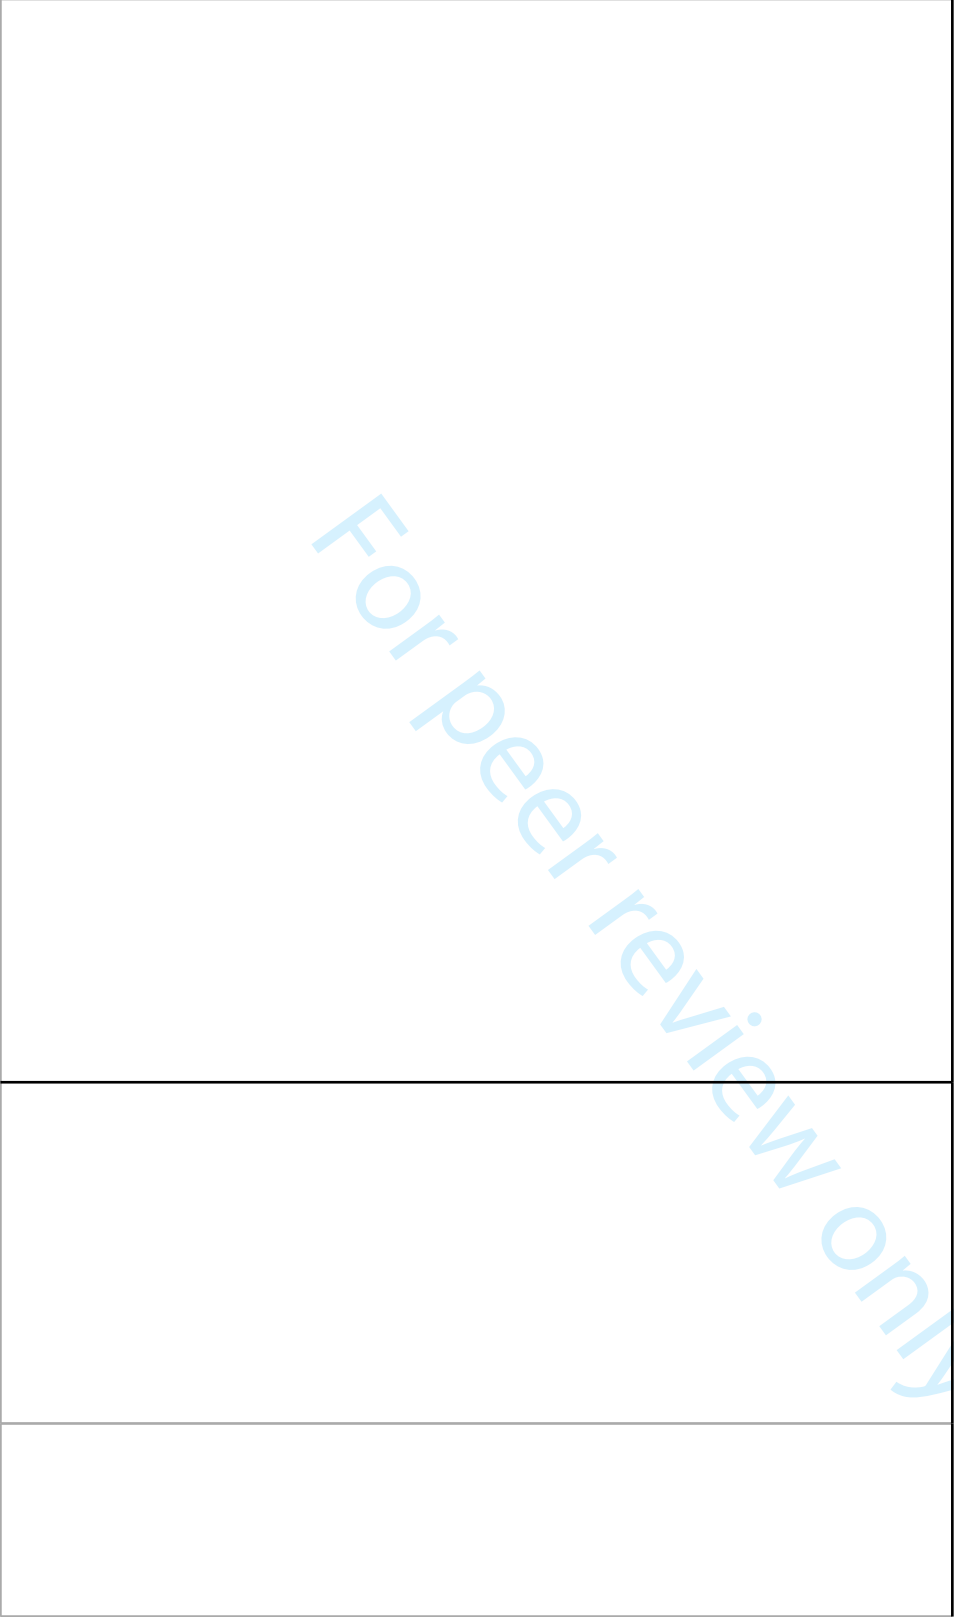

1  
2  
3  
4  
5  
6  
7  
8  
9  
10  
11  
12  
13  
14  
15  
16  
17  
18  
19  
20  
21  
22  
23  
24  
25  
26  
27  
28  
29  
30  
31  
32  
33  
34  
35  
36  
37  
38  
39  
40  
41  
42  
43  
44  
45  
46  
47  
48  
49  
50  
51  
52  
53  
54  
55  
56  
57  
58  
59  
60

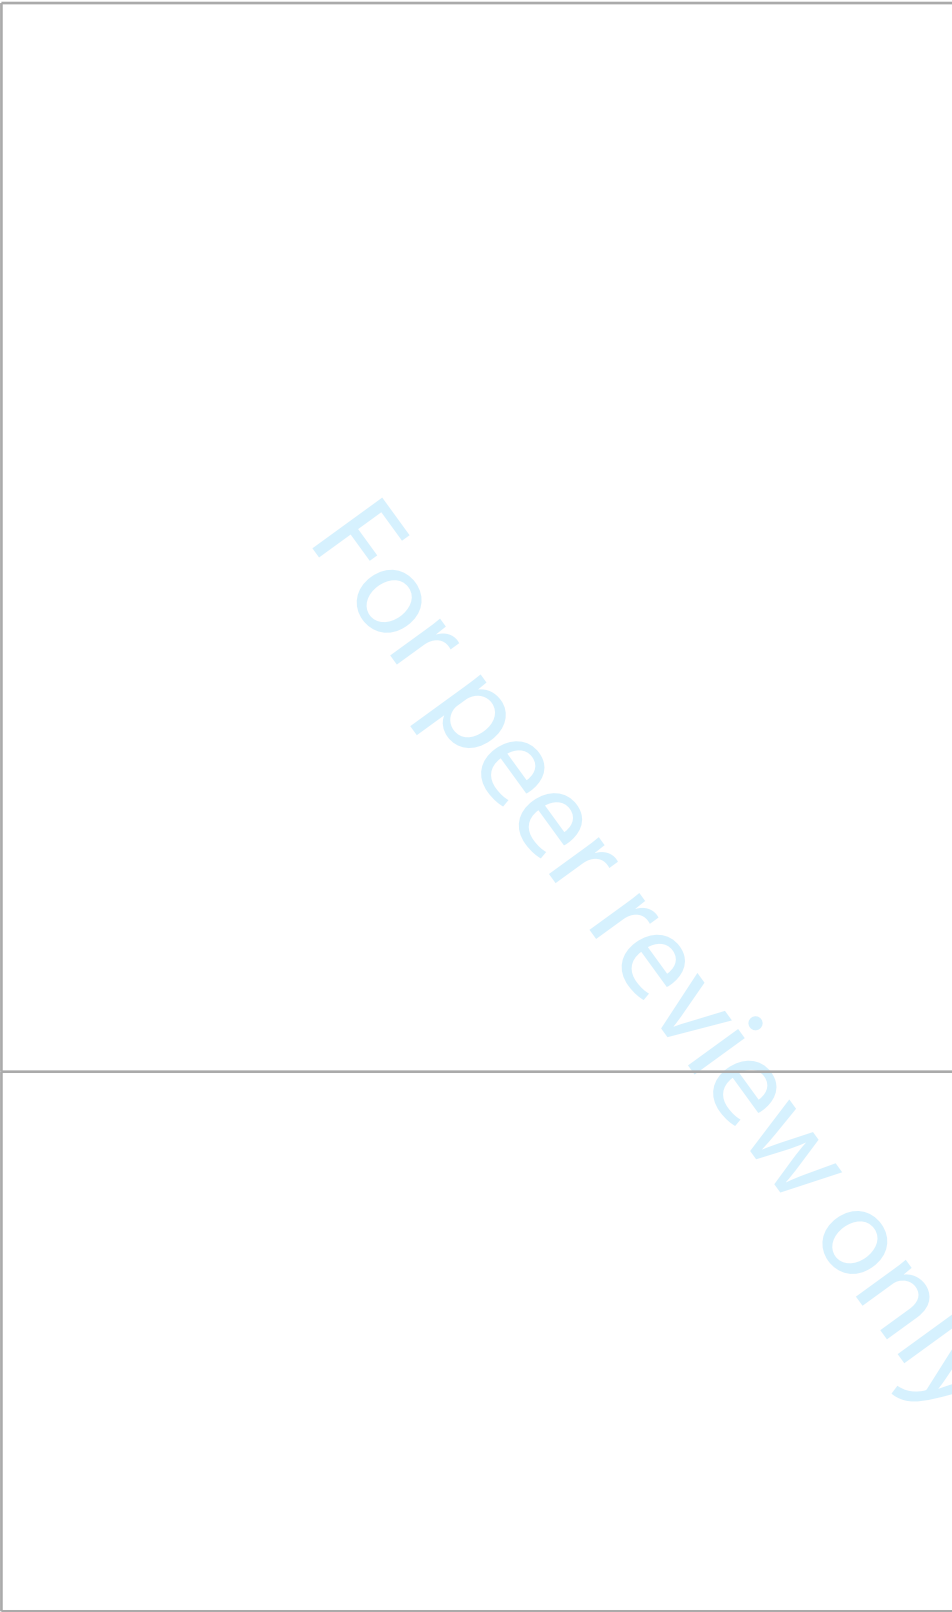



1  
2  
3  
4  
5  
6  
7  
8  
9  
10  
11  
12  
13  
14  
15  
16  
17  
18  
19  
20  
21  
22  
23  
24  
25  
26  
27  
28  
29  
30  
31  
32  
33  
34  
35  
36  
37  
38  
39  
40  
41  
42  
43  
44  
45  
46  
47  
48  
49  
50  
51  
52  
53  
54  
55  
56  
57  
58  
59  
60

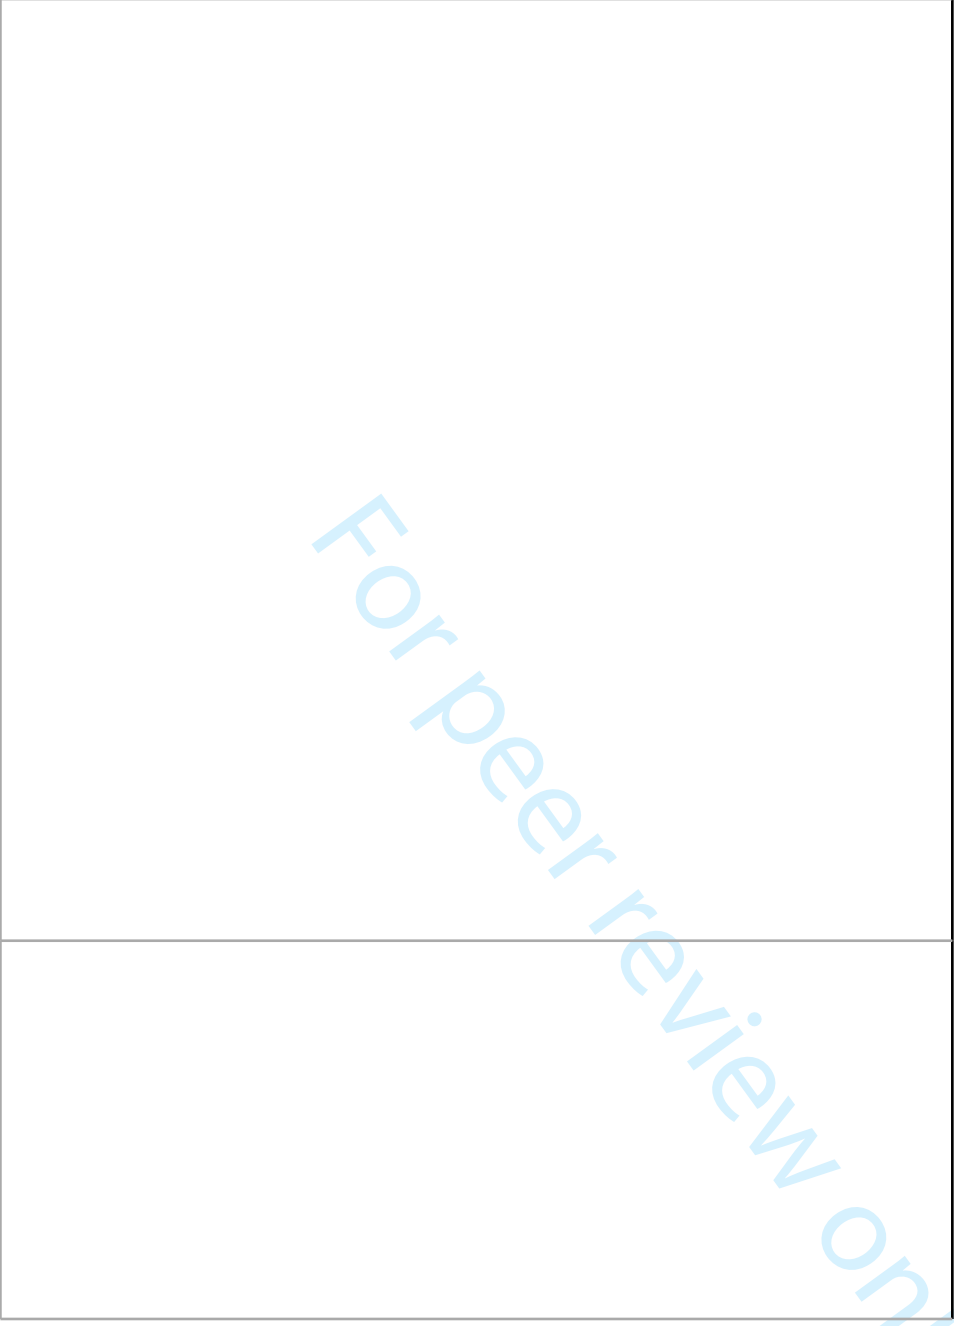

1  
2  
3  
4  
5  
6  
7  
8  
9  
10  
11  
12  
13  
14  
15  
16  
17  
18  
19  
20  
21  
22  
23  
24  
25  
26  
27  
28  
29  
30  
31  
32  
33  
34  
35  
36  
37  
38  
39  
40  
41  
42  
43  
44  
45  
46  
47  
48  
49  
50  
51  
52  
53  
54  
55  
56  
57  
58  
59  
60

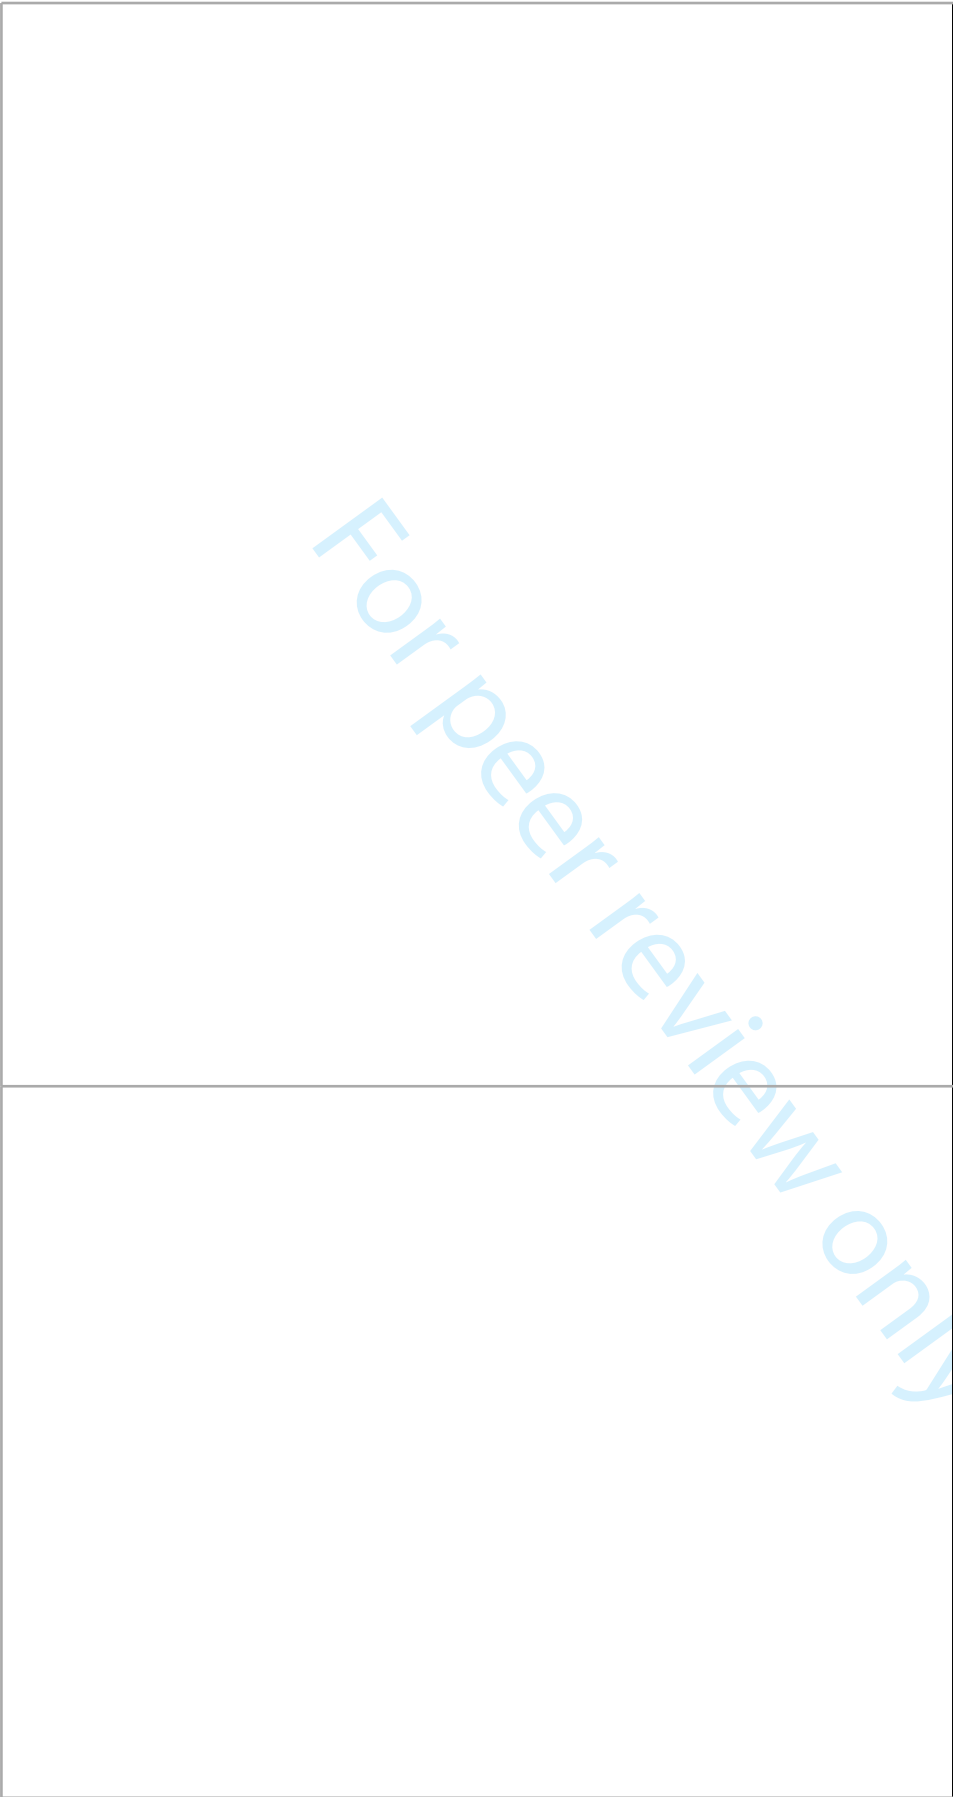

For peer review only

1  
2  
3  
4  
5  
6  
7  
8  
9  
10  
11  
12  
13  
14  
15  
16  
17  
18  
19  
20  
21  
22  
23  
24  
25  
26  
27  
28  
29  
30  
31  
32  
33  
34  
35  
36  
37  
38  
39  
40  
41  
42  
43  
44  
45  
46  
47  
48  
49  
50  
51  
52  
53  
54  
55  
56  
57  
58  
59  
60

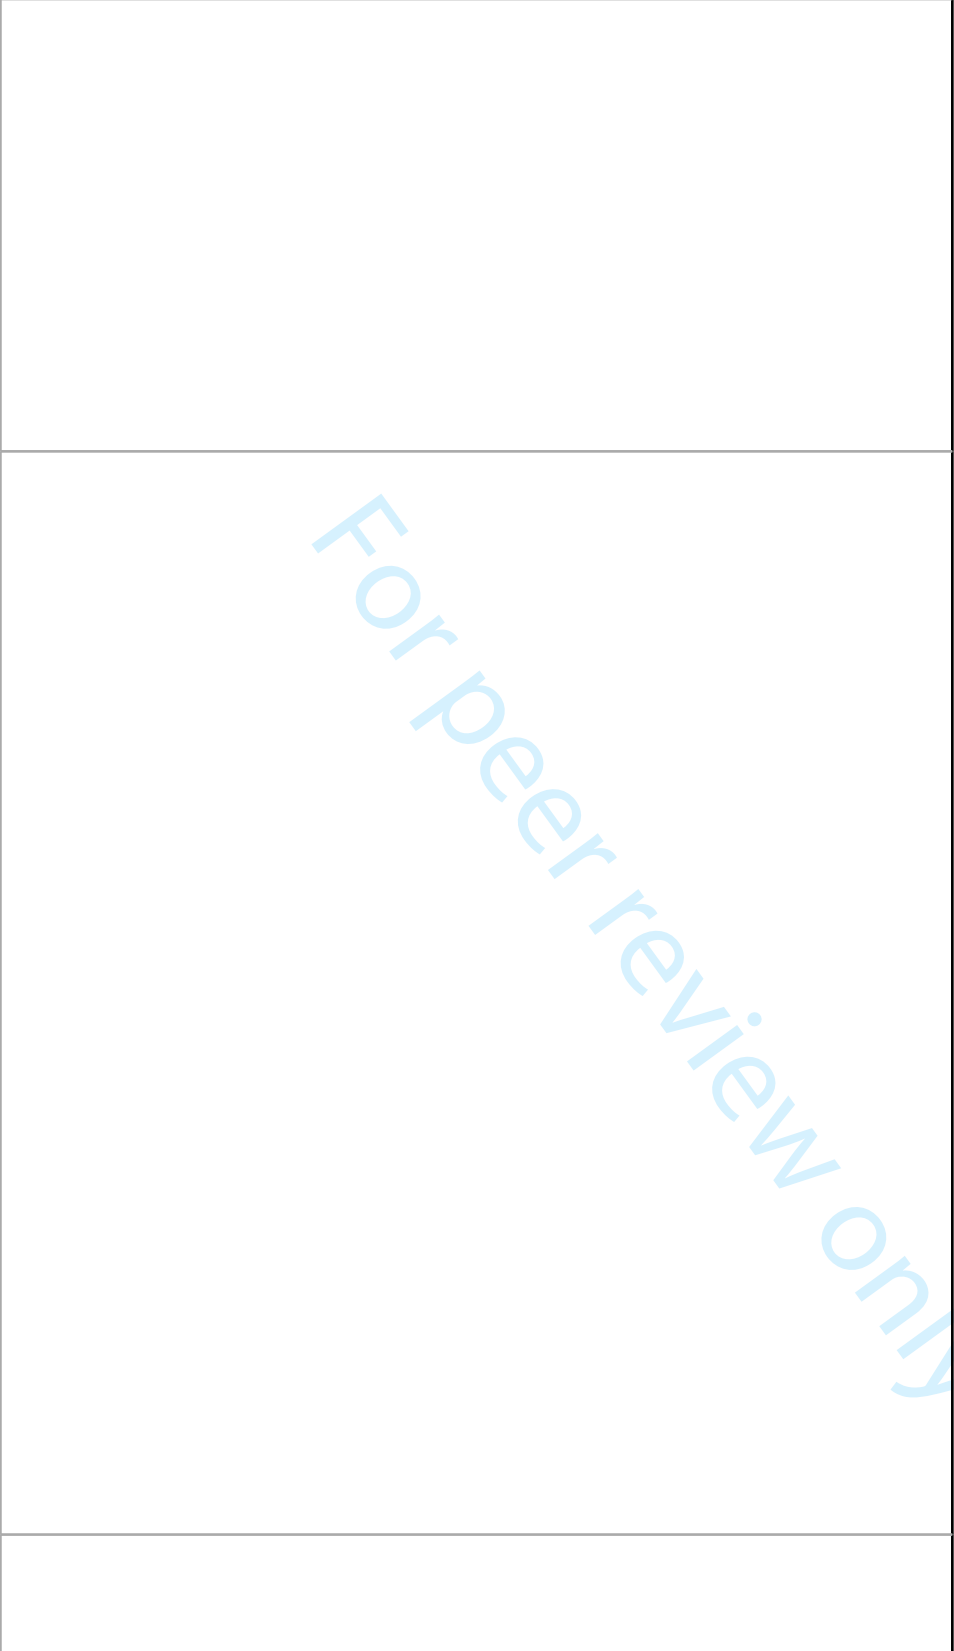



1  
2  
3  
4  
5  
6  
7  
8  
9  
10  
11  
12  
13  
14  
15  
16  
17  
18  
19  
20  
21  
22  
23  
24  
25  
26  
27  
28  
29  
30  
31  
32  
33  
34  
35  
36  
37  
38  
39  
40  
41  
42  
43  
44  
45  
46  
47  
48  
49  
50  
51  
52  
53  
54  
55  
56  
57  
58  
59  
60

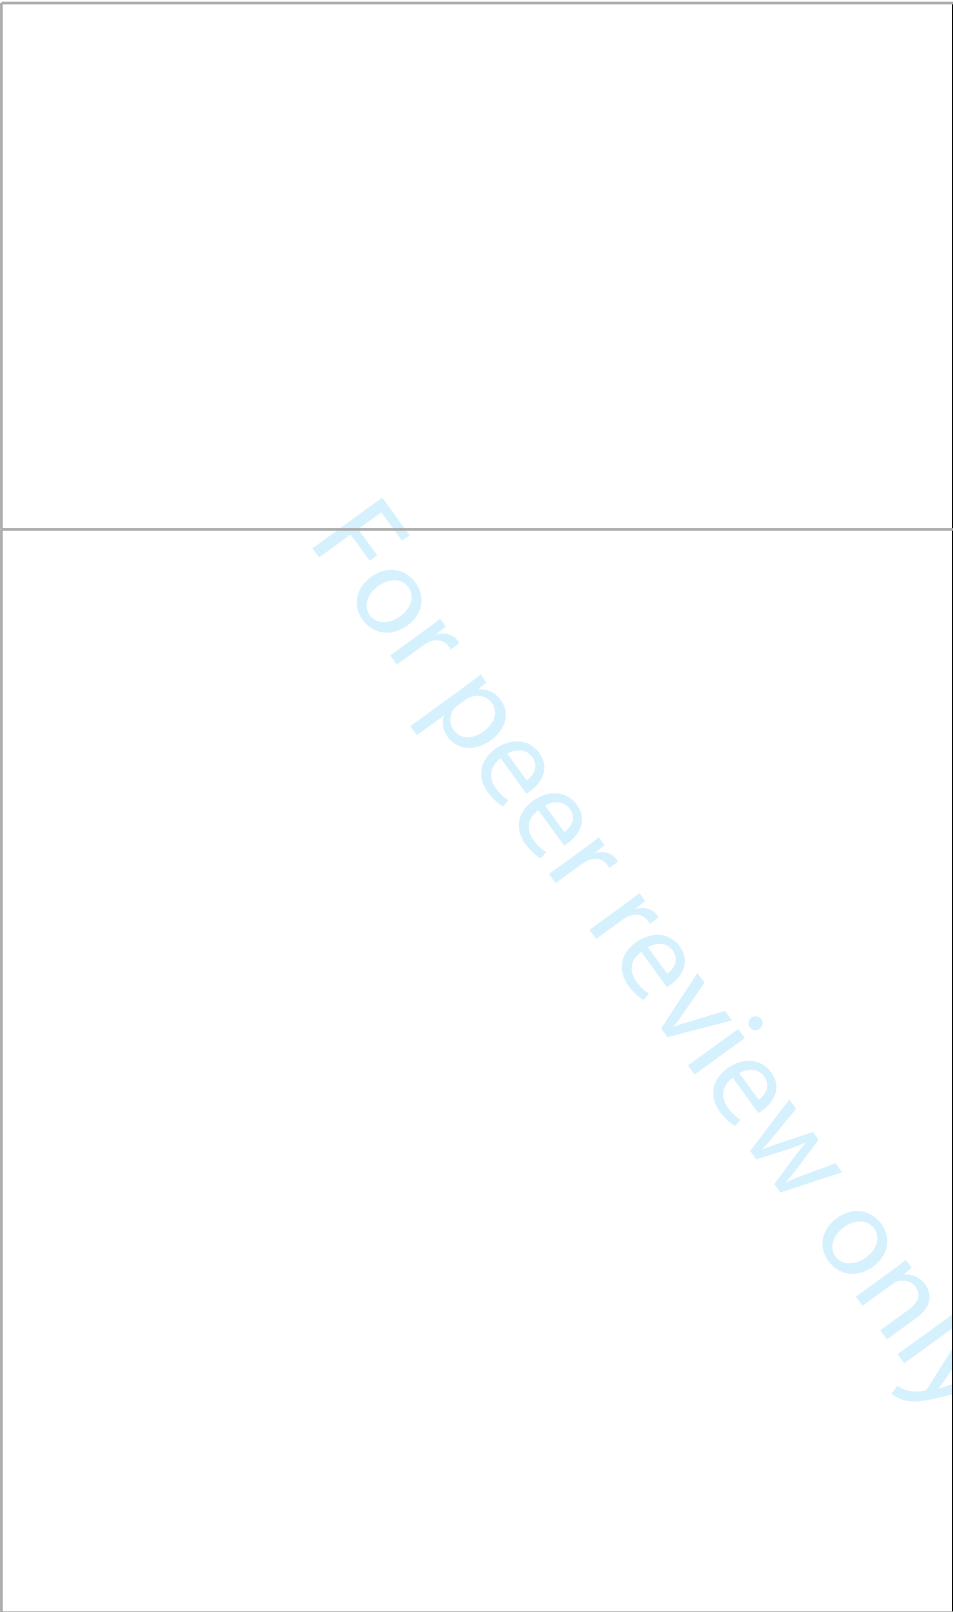

1  
2  
3  
4  
5  
6  
7  
8  
9  
10  
11  
12  
13  
14  
15  
16  
17  
18  
19  
20  
21  
22  
23  
24  
25  
26  
27  
28  
29  
30  
31  
32  
33  
34  
35  
36  
37  
38  
39  
40  
41  
42  
43  
44  
45  
46  
47  
48  
49  
50  
51  
52  
53  
54  
55  
56  
57  
58  
59  
60

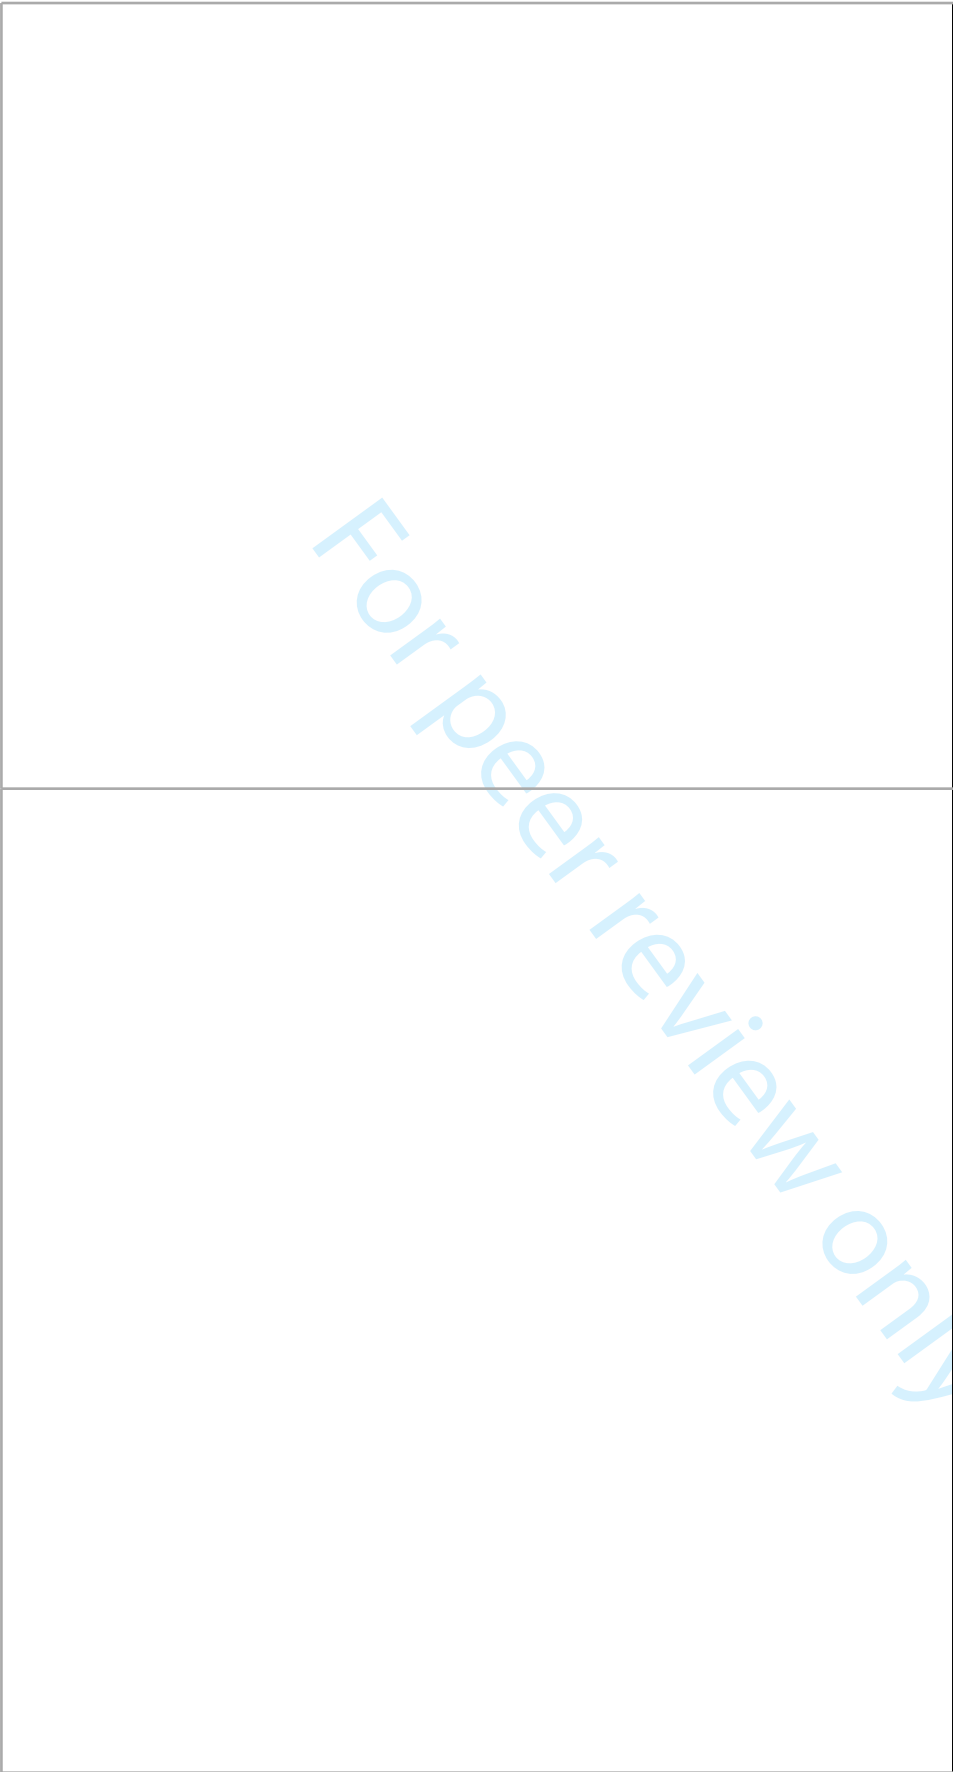

1  
2  
3  
4  
5  
6  
7  
8  
9  
10  
11  
12  
13  
14  
15  
16  
17  
18  
19  
20  
21  
22  
23  
24  
25  
26  
27  
28  
29  
30  
31  
32  
33  
34  
35  
36  
37  
38  
39  
40  
41  
42  
43  
44  
45  
46  
47  
48  
49  
50  
51  
52  
53  
54  
55  
56  
57  
58  
59  
60

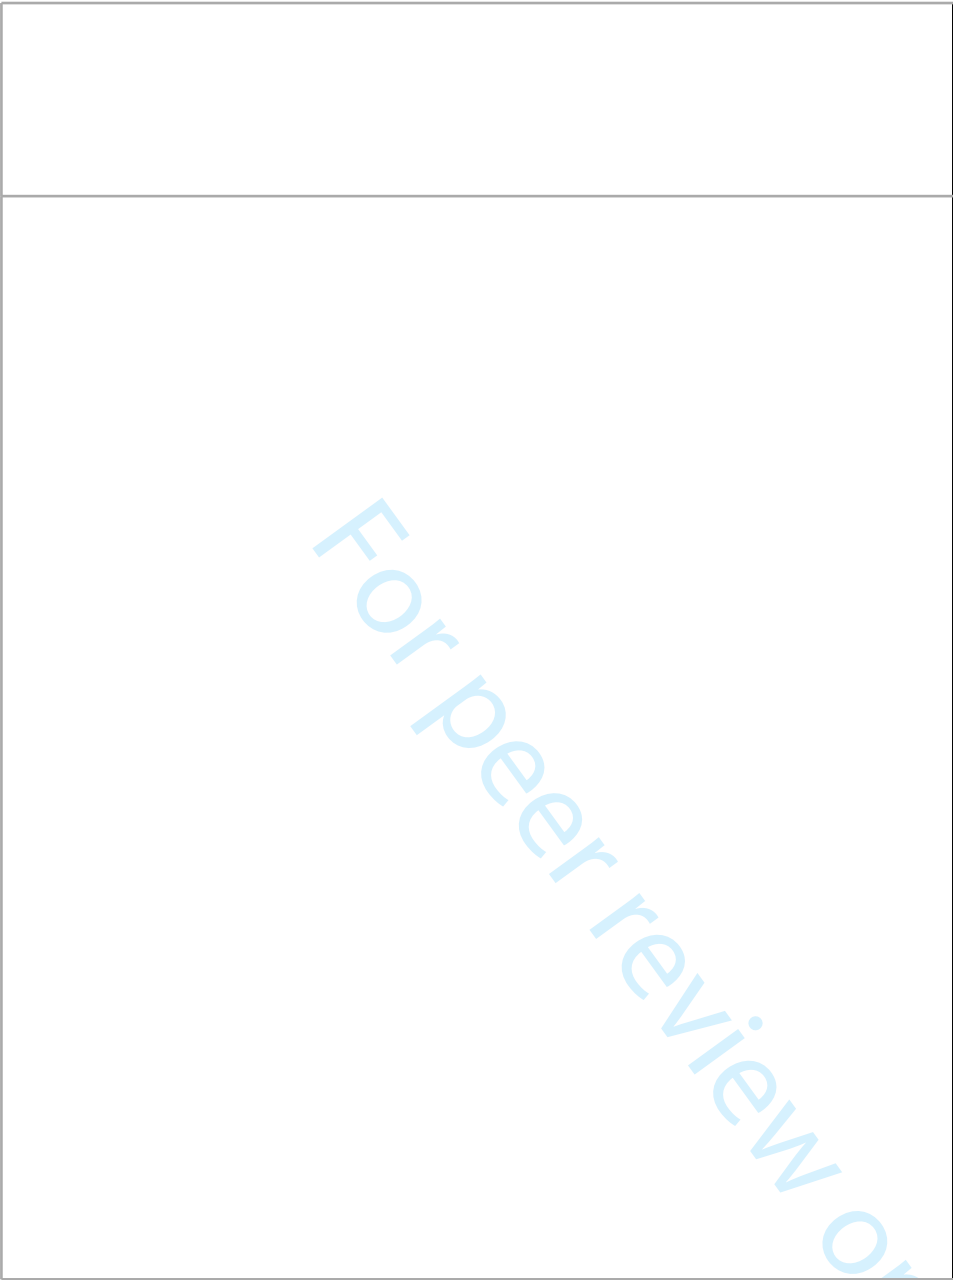

For peer review only

1  
2  
3  
4  
5  
6  
7  
8  
9  
10  
11  
12  
13  
14  
15  
16  
17  
18  
19  
20  
21  
22  
23  
24  
25  
26  
27  
28  
29  
30  
31  
32  
33  
34  
35  
36  
37  
38  
39  
40  
41  
42  
43  
44  
45  
46  
47  
48  
49  
50  
51  
52  
53  
54  
55  
56  
57  
58  
59  
60

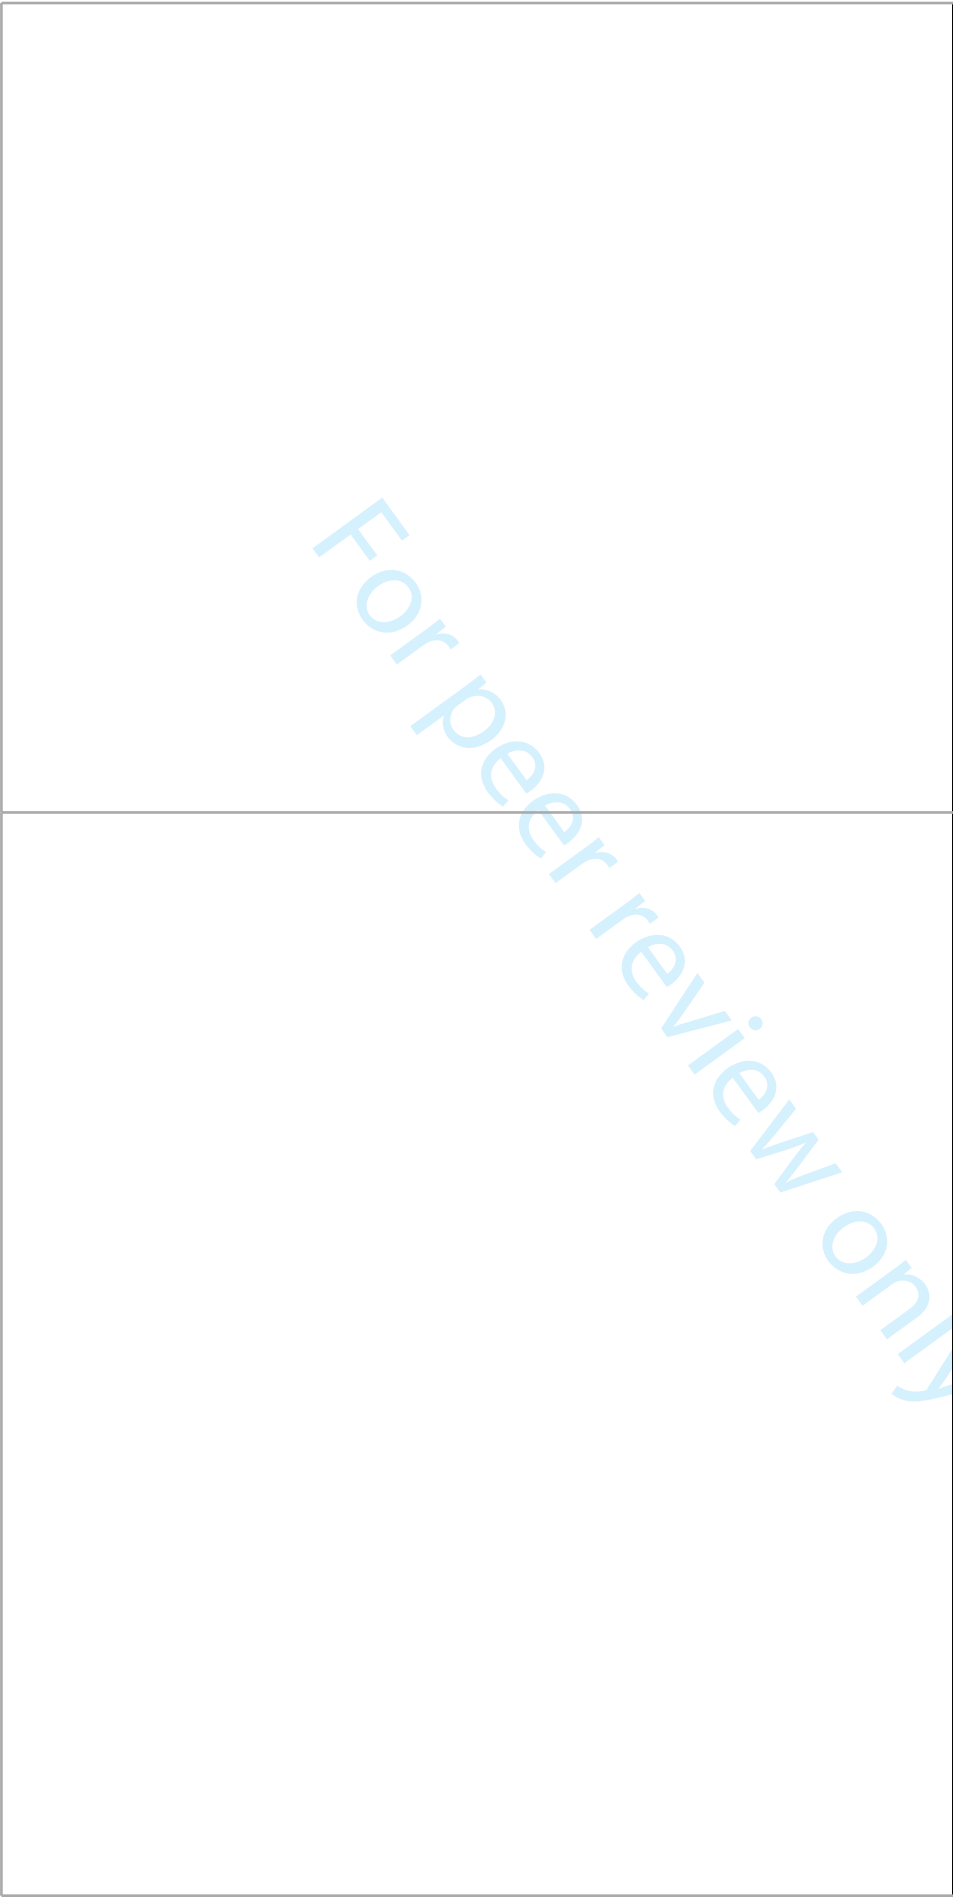



1  
2  
3  
4  
5  
6  
7  
8  
9  
10  
11  
12  
13  
14  
15  
16  
17  
18  
19  
20  
21  
22  
23  
24  
25  
26  
27  
28  
29  
30  
31  
32  
33  
34  
35  
36  
37  
38  
39  
40  
41  
42  
43  
44  
45  
46  
47  
48  
49  
50  
51  
52  
53  
54  
55  
56  
57  
58  
59  
60

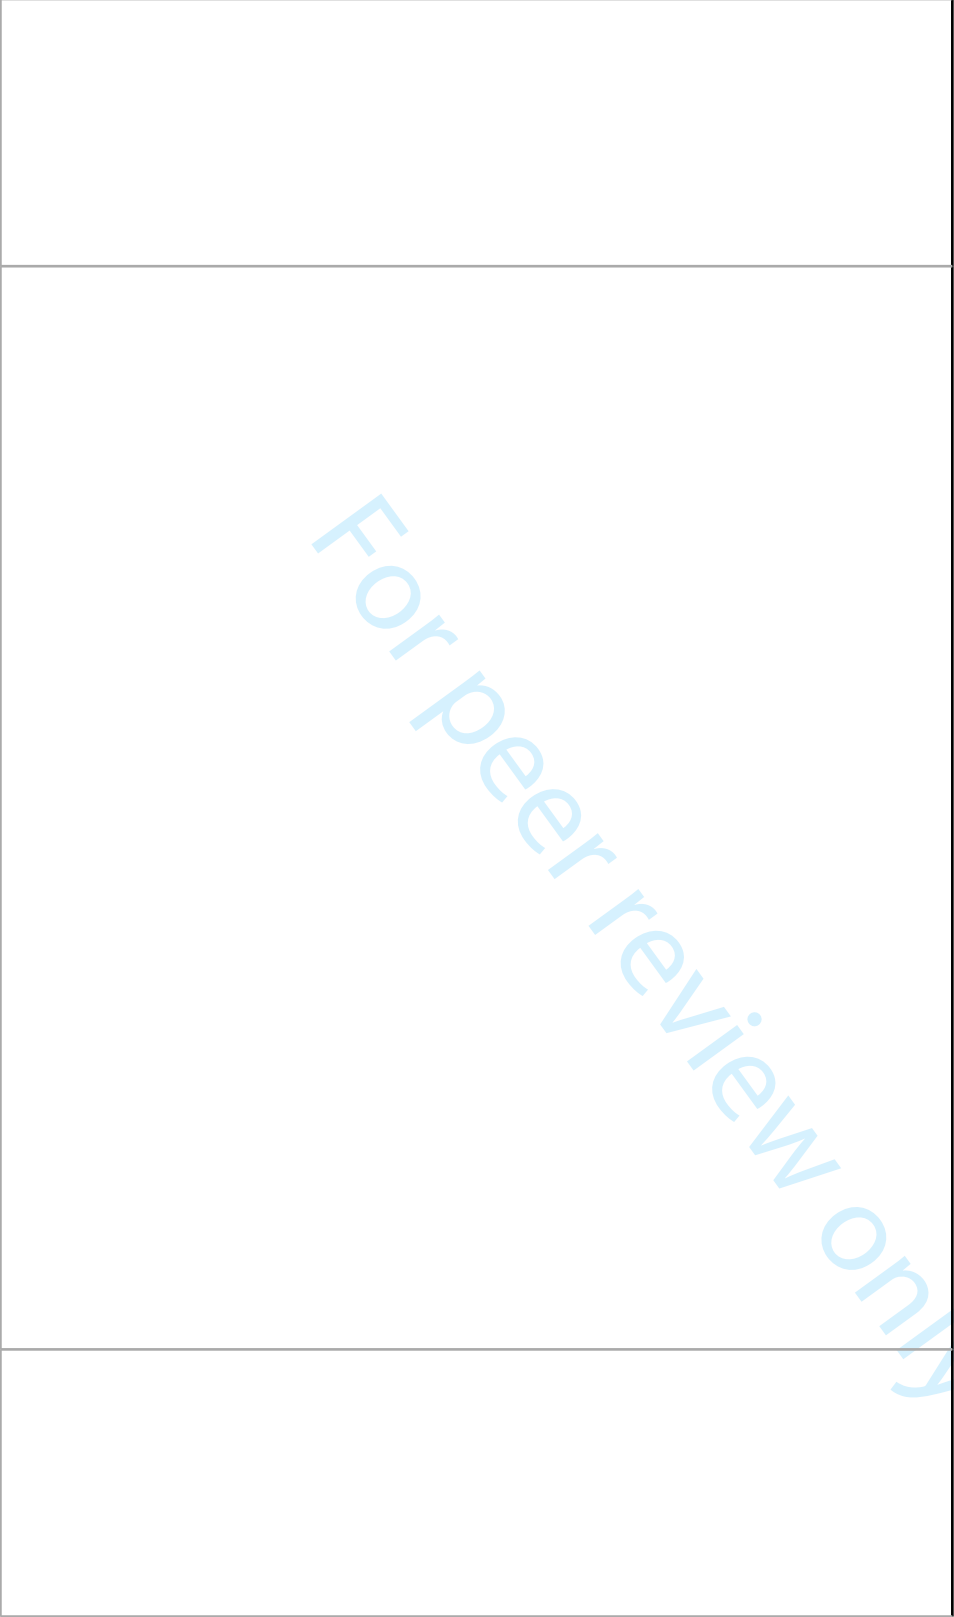

1  
2  
3  
4  
5  
6  
7  
8  
9  
10  
11  
12  
13  
14  
15  
16  
17  
18  
19  
20  
21  
22  
23  
24  
25  
26  
27  
28  
29  
30  
31  
32  
33  
34  
35  
36  
37  
38  
39  
40  
41  
42  
43  
44  
45  
46  
47  
48  
49  
50  
51  
52  
53  
54  
55  
56  
57  
58  
59  
60

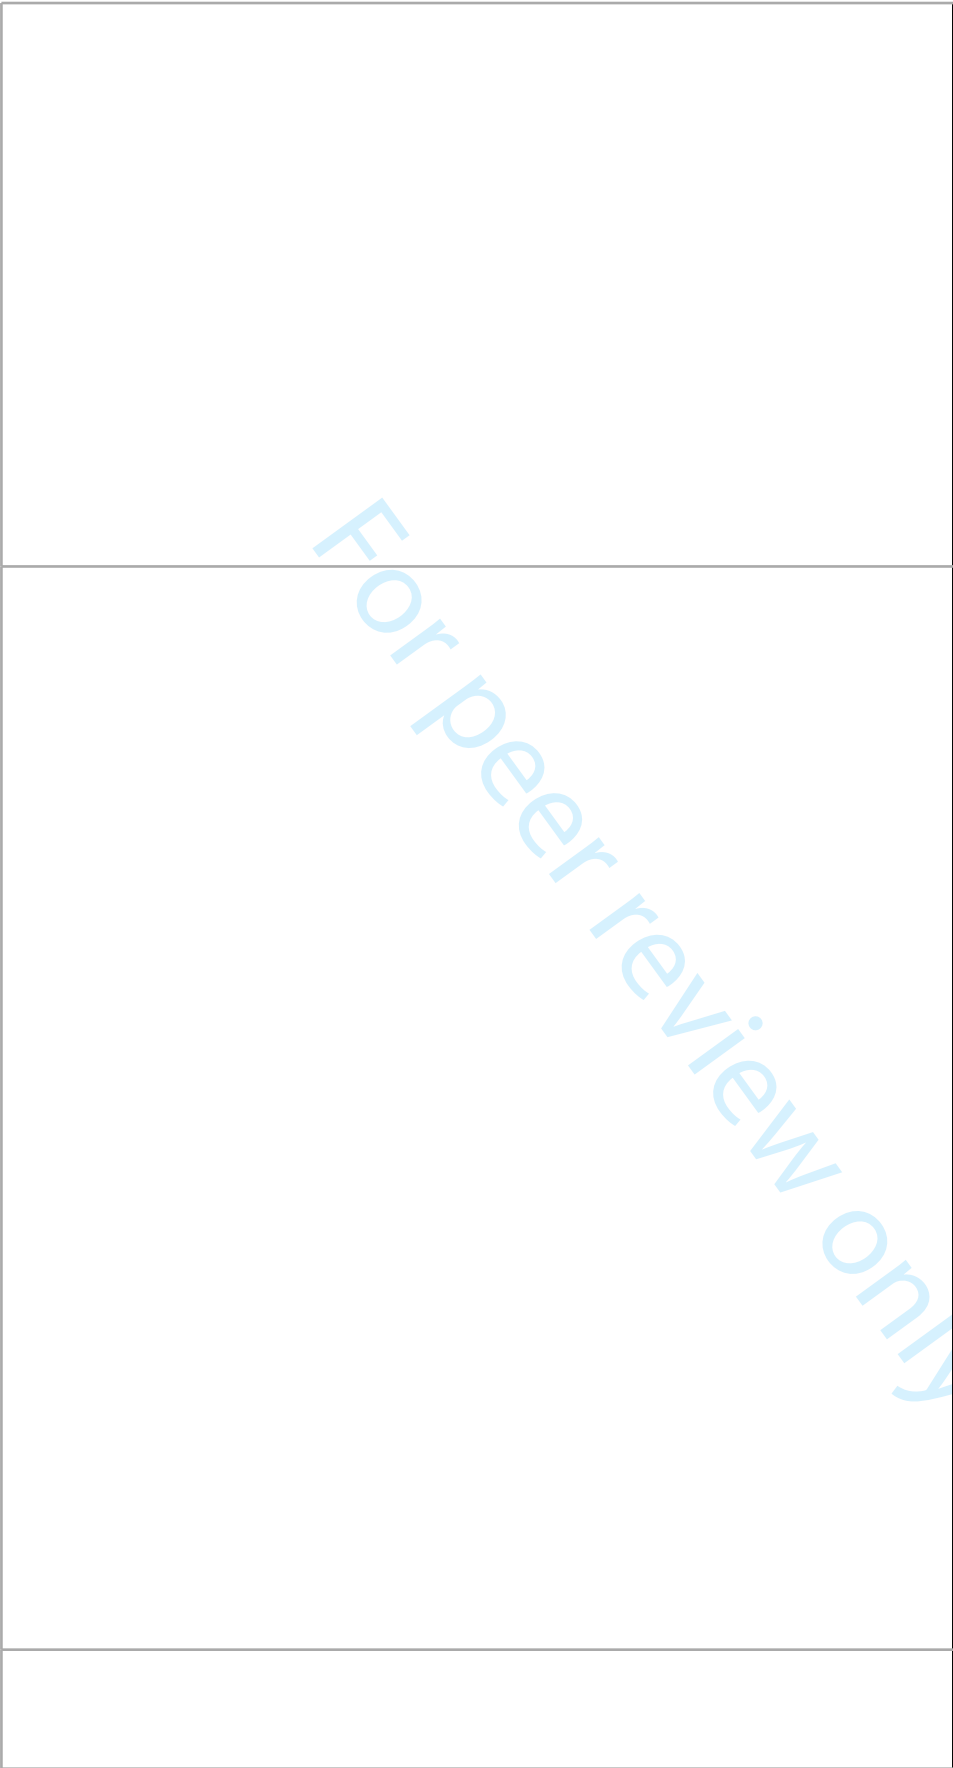

1  
2  
3  
4  
5  
6  
7  
8  
9  
10  
11  
12  
13  
14  
15  
16  
17  
18  
19  
20  
21  
22  
23  
24  
25  
26  
27  
28  
29  
30  
31  
32  
33  
34  
35  
36  
37  
38  
39  
40  
41  
42  
43  
44  
45  
46  
47  
48  
49  
50  
51  
52  
53  
54  
55  
56  
57  
58  
59  
60

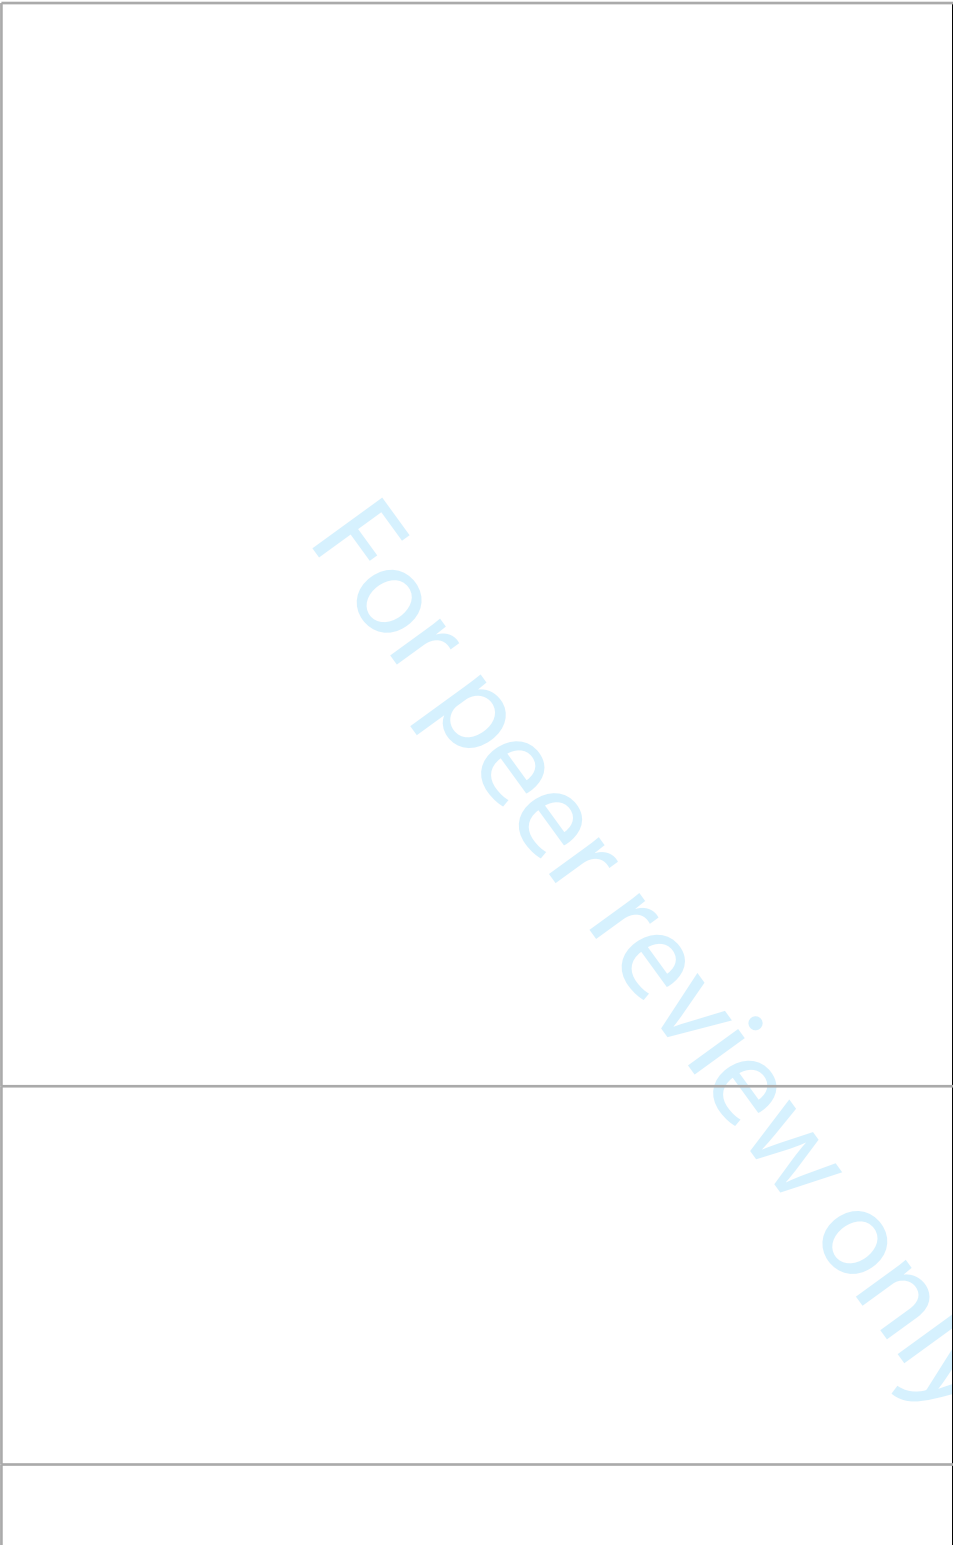

1  
2  
3  
4  
5  
6  
7  
8  
9  
10  
11  
12  
13  
14  
15  
16  
17  
18  
19  
20  
21  
22  
23  
24  
25  
26  
27  
28  
29  
30  
31  
32  
33  
34  
35  
36  
37  
38  
39  
40  
41  
42  
43  
44  
45  
46  
47  
48  
49  
50  
51  
52  
53  
54  
55  
56  
57  
58  
59  
60

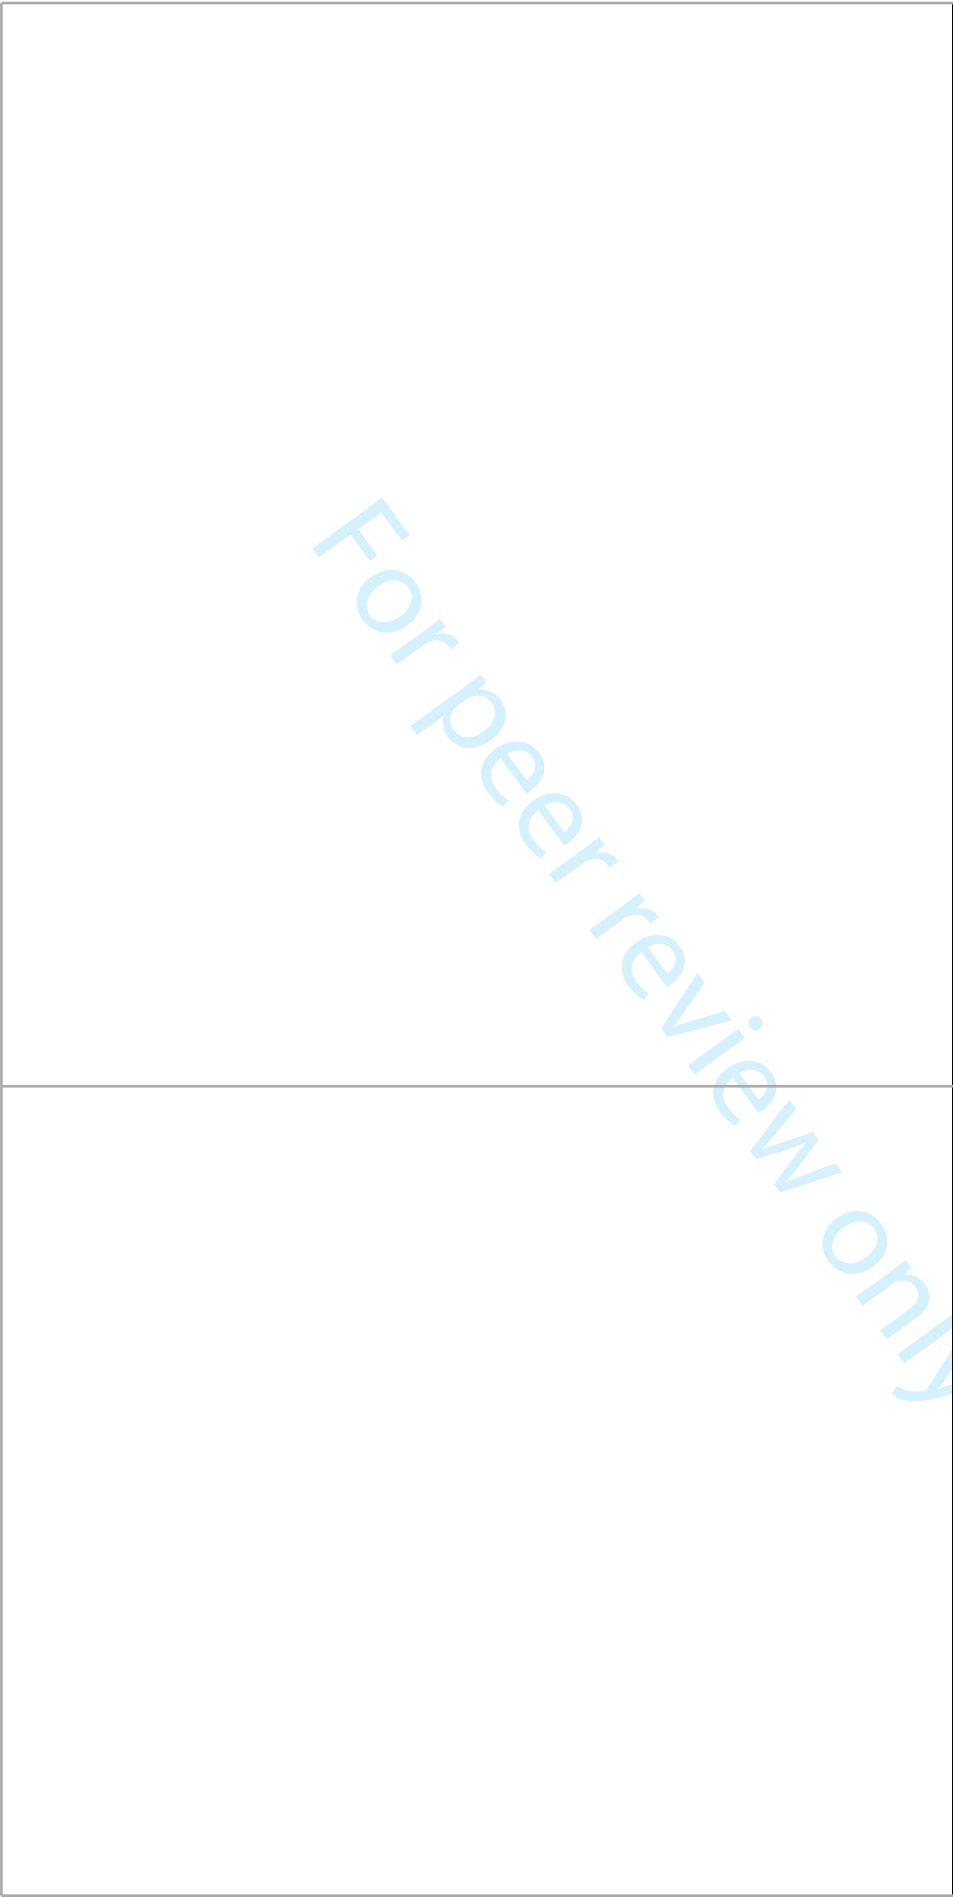

1  
2  
3  
4  
5  
6  
7  
8  
9  
10  
11  
12  
13  
14  
15  
16  
17  
18  
19  
20  
21  
22  
23  
24  
25  
26  
27  
28  
29  
30  
31  
32  
33  
34  
35  
36  
37  
38  
39  
40  
41  
42  
43  
44  
45  
46  
47  
48  
49  
50  
51  
52  
53  
54  
55  
56  
57  
58  
59  
60

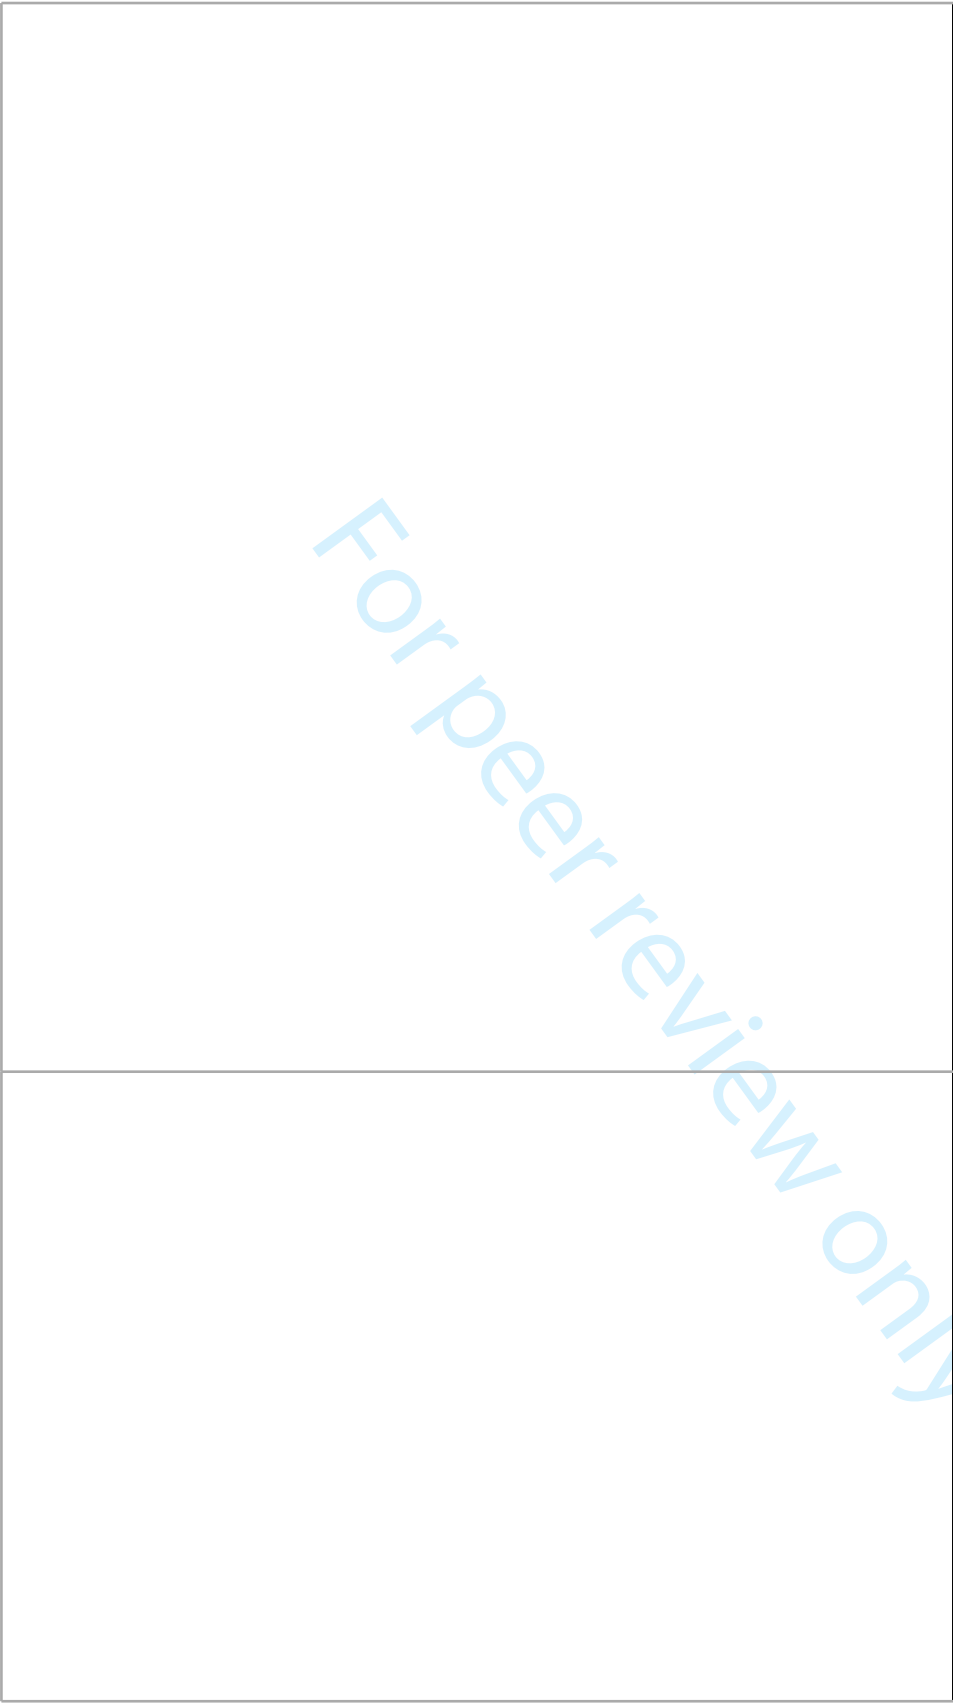

1  
2  
3  
4  
5  
6  
7  
8  
9  
10  
11  
12  
13  
14  
15  
16  
17  
18  
19  
20  
21  
22  
23  
24  
25  
26  
27  
28  
29  
30  
31  
32  
33  
34  
35  
36  
37  
38  
39  
40  
41  
42  
43  
44  
45  
46  
47  
48  
49  
50  
51  
52  
53  
54  
55  
56  
57  
58  
59  
60

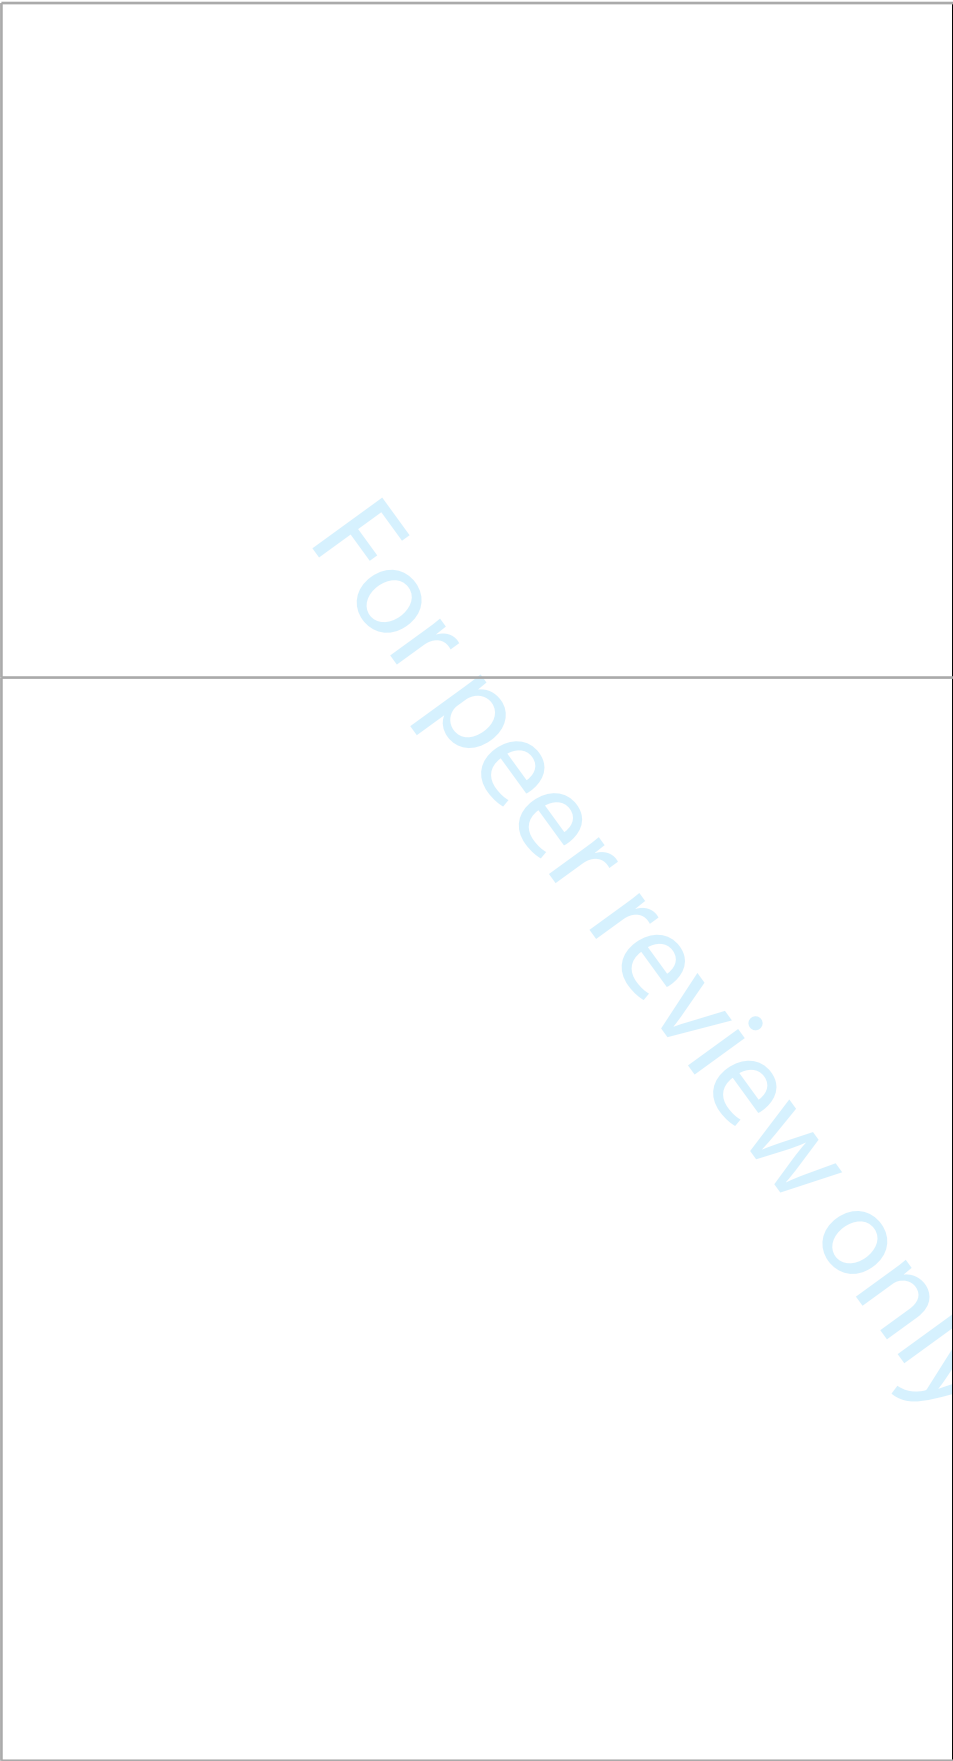

1  
2  
3  
4  
5  
6  
7  
8  
9  
10  
11  
12  
13  
14  
15  
16  
17  
18  
19  
20  
21  
22  
23  
24  
25  
26  
27  
28  
29  
30  
31  
32  
33  
34  
35  
36  
37  
38  
39  
40  
41  
42  
43  
44  
45  
46  
47  
48  
49  
50  
51  
52  
53  
54  
55  
56  
57  
58  
59  
60

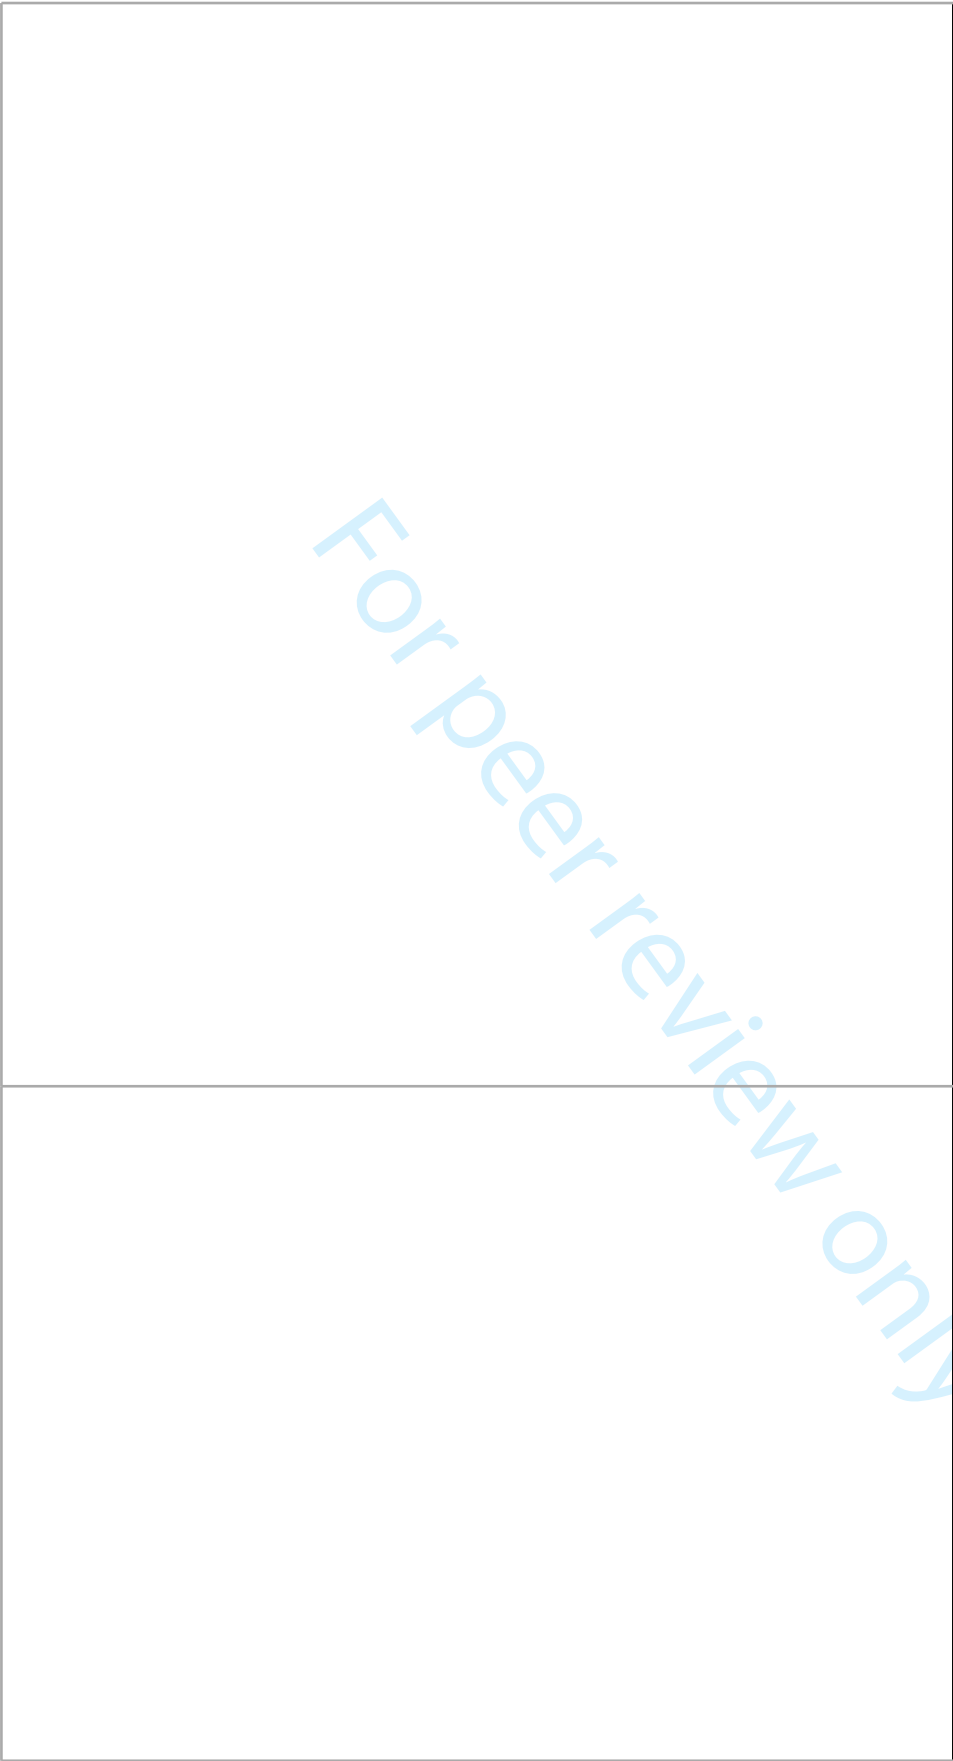

For peer review only

1  
2  
3  
4  
5  
6  
7  
8  
9  
10  
11  
12  
13  
14  
15  
16  
17  
18  
19  
20  
21  
22  
23  
24  
25  
26  
27  
28  
29  
30  
31  
32  
33  
34  
35  
36  
37  
38  
39  
40  
41  
42  
43  
44  
45  
46  
47  
48  
49  
50  
51  
52  
53  
54  
55  
56  
57  
58  
59  
60

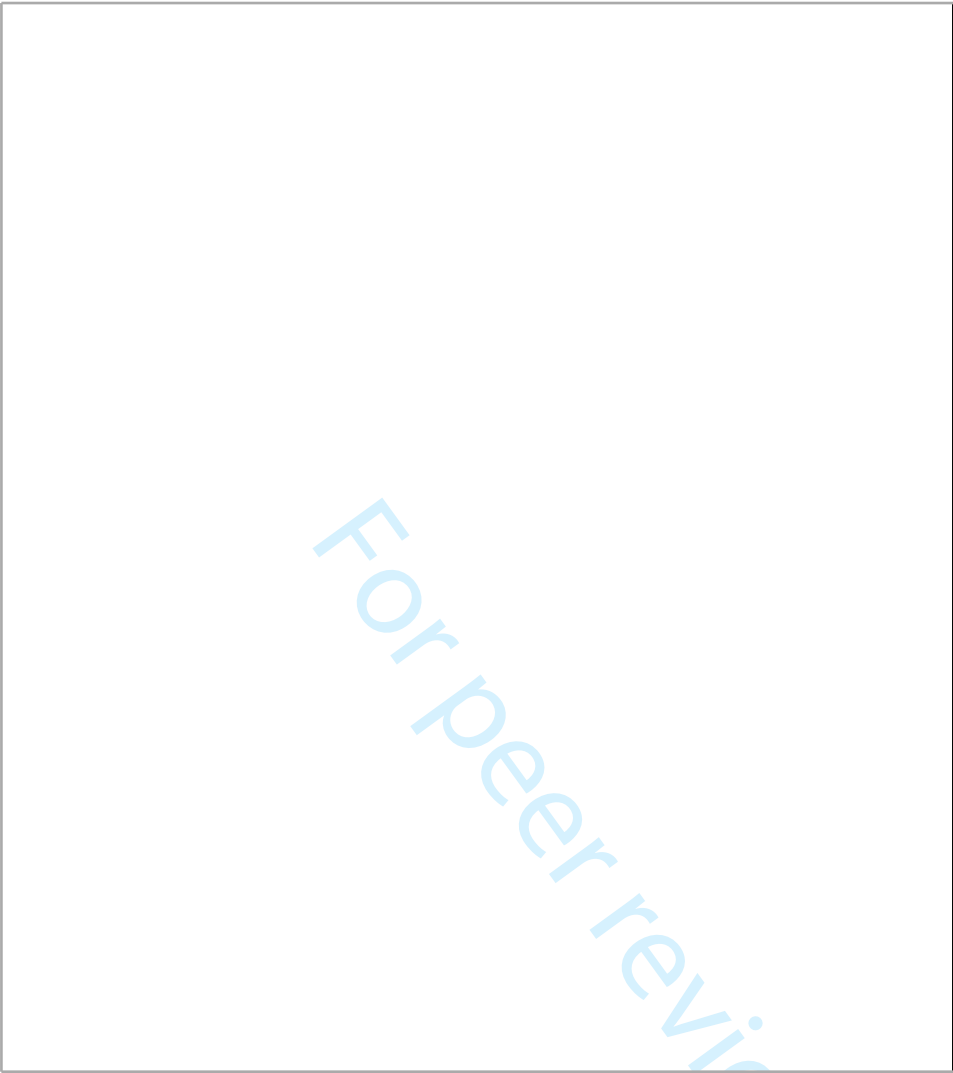

For peer review only



1  
2  
3  
4  
5  
6  
7  
8  
9  
10  
11  
12  
13  
14  
15  
16  
17  
18  
19  
20  
21  
22  
23  
24  
25  
26  
27  
28  
29  
30  
31  
32  
33  
34  
35  
36  
37  
38  
39  
40  
41  
42  
43  
44  
45  
46  
47  
48  
49  
50  
51  
52  
53  
54  
55  
56  
57  
58  
59  
60

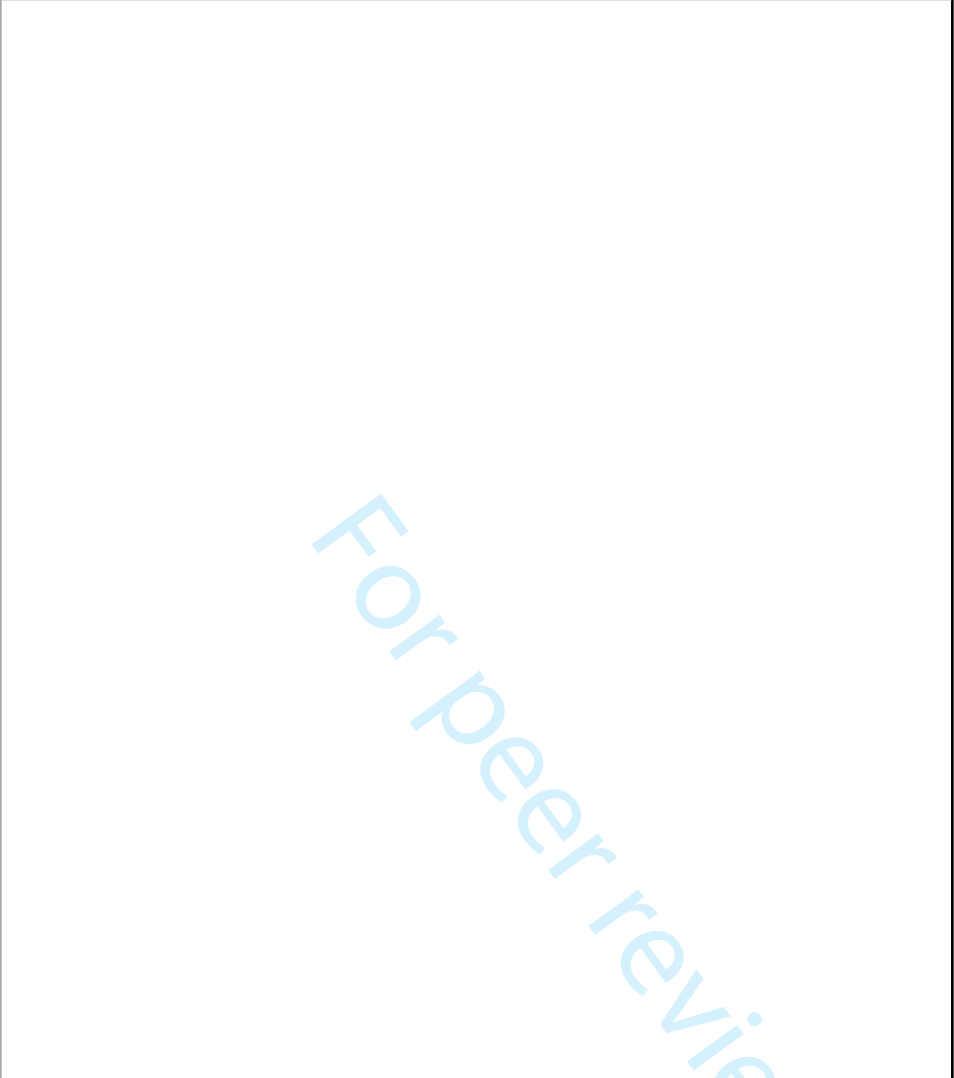

For peer review only

1  
2  
3  
4  
5  
6  
7  
8  
9  
10  
11  
12  
13  
14  
15  
16  
17  
18  
19  
20  
21  
22  
23  
24  
25  
26  
27  
28  
29  
30  
31  
32  
33  
34  
35  
36  
37  
38  
39  
40  
41  
42  
43  
44  
45  
46  
47  
48  
49  
50  
51  
52  
53  
54  
55  
56  
57  
58  
59  
60

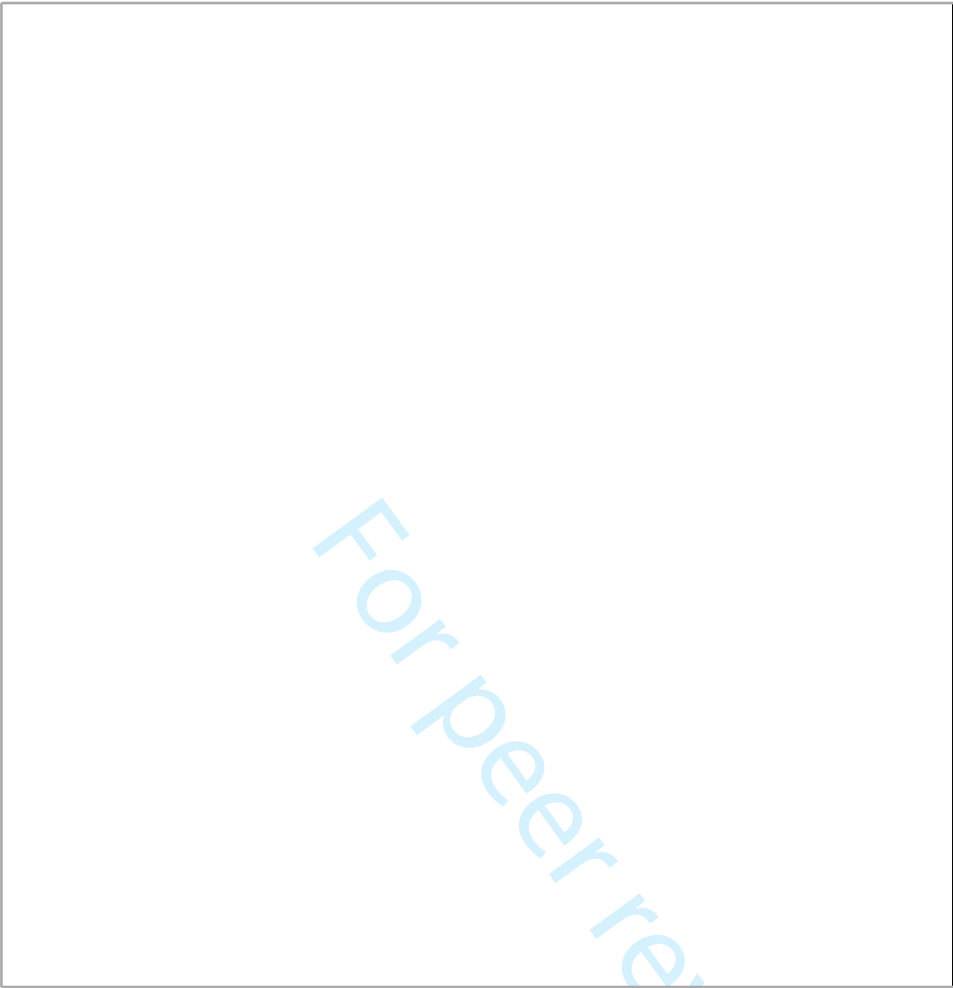

For peer review only

1  
2  
3  
4  
5  
6  
7  
8  
9  
10  
11  
12  
13  
14  
15  
16  
17  
18  
19  
20  
21  
22  
23  
24  
25  
26  
27  
28  
29  
30  
31  
32  
33  
34  
35  
36  
37  
38  
39  
40  
41  
42  
43  
44  
45  
46  
47  
48  
49  
50  
51  
52  
53  
54  
55  
56  
57  
58  
59  
60

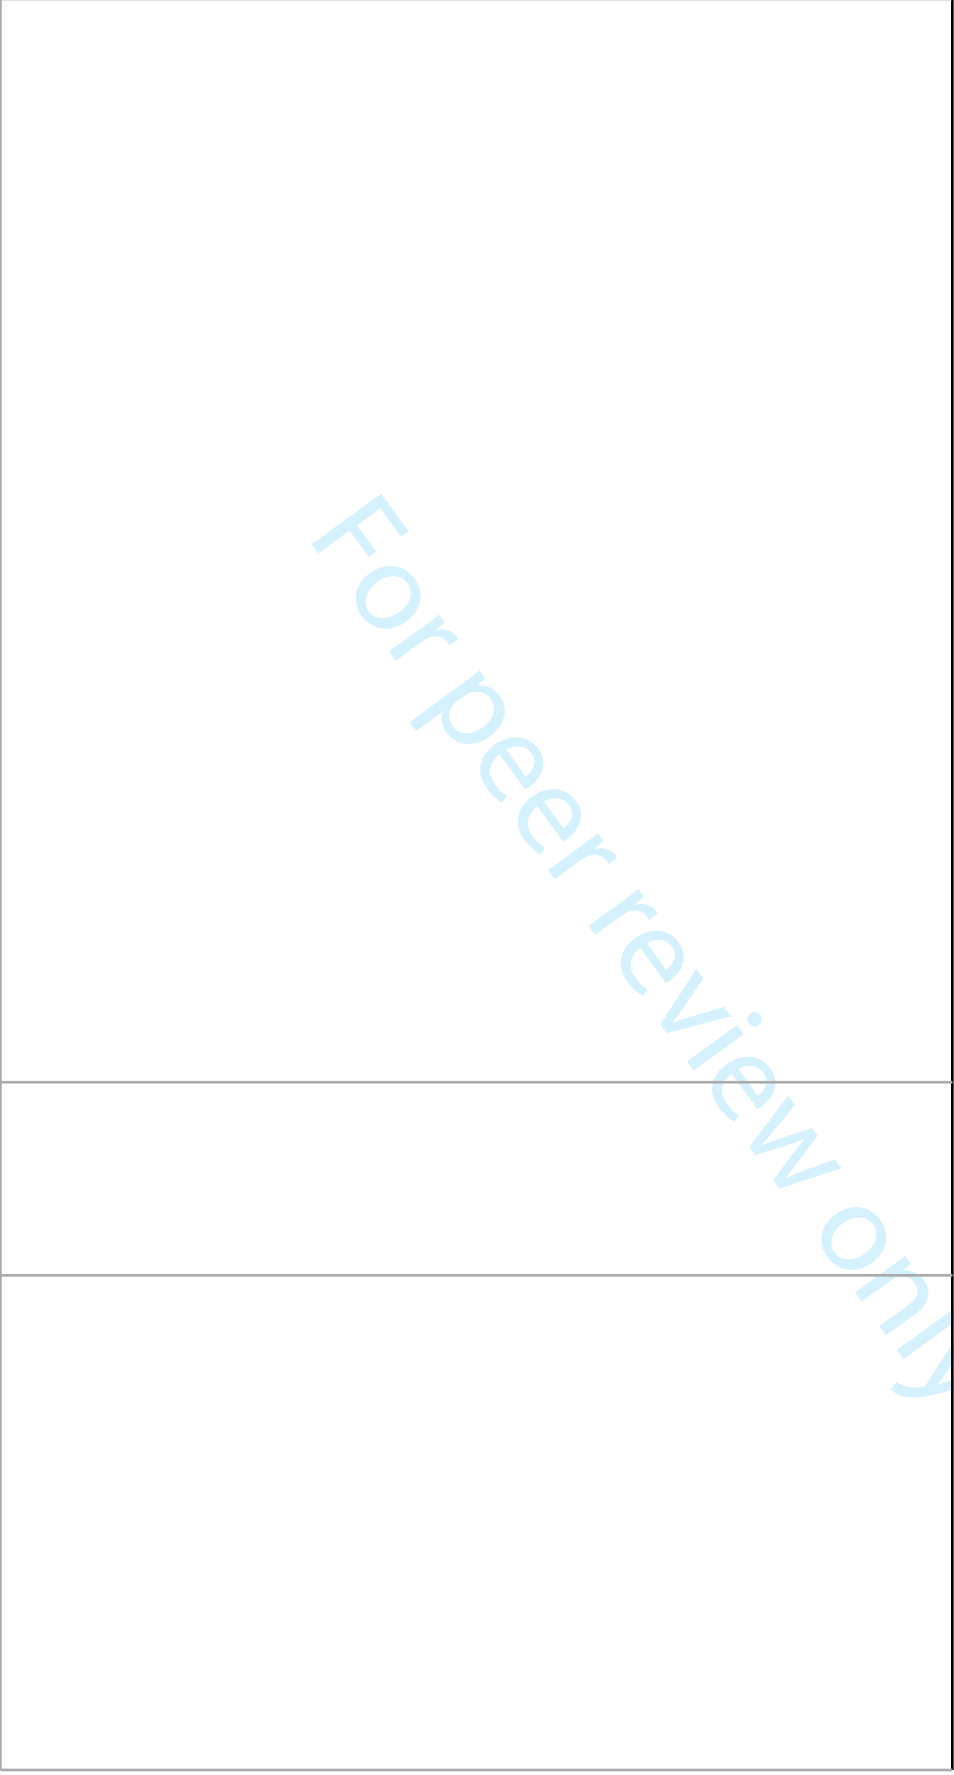

1  
2  
3  
4  
5  
6  
7  
8  
9  
10  
11  
12  
13  
14  
15  
16  
17  
18  
19  
20  
21  
22  
23  
24  
25  
26  
27  
28  
29  
30  
31  
32  
33  
34  
35  
36  
37  
38  
39  
40  
41  
42  
43  
44  
45  
46  
47  
48  
49  
50  
51  
52  
53  
54  
55  
56  
57  
58  
59  
60

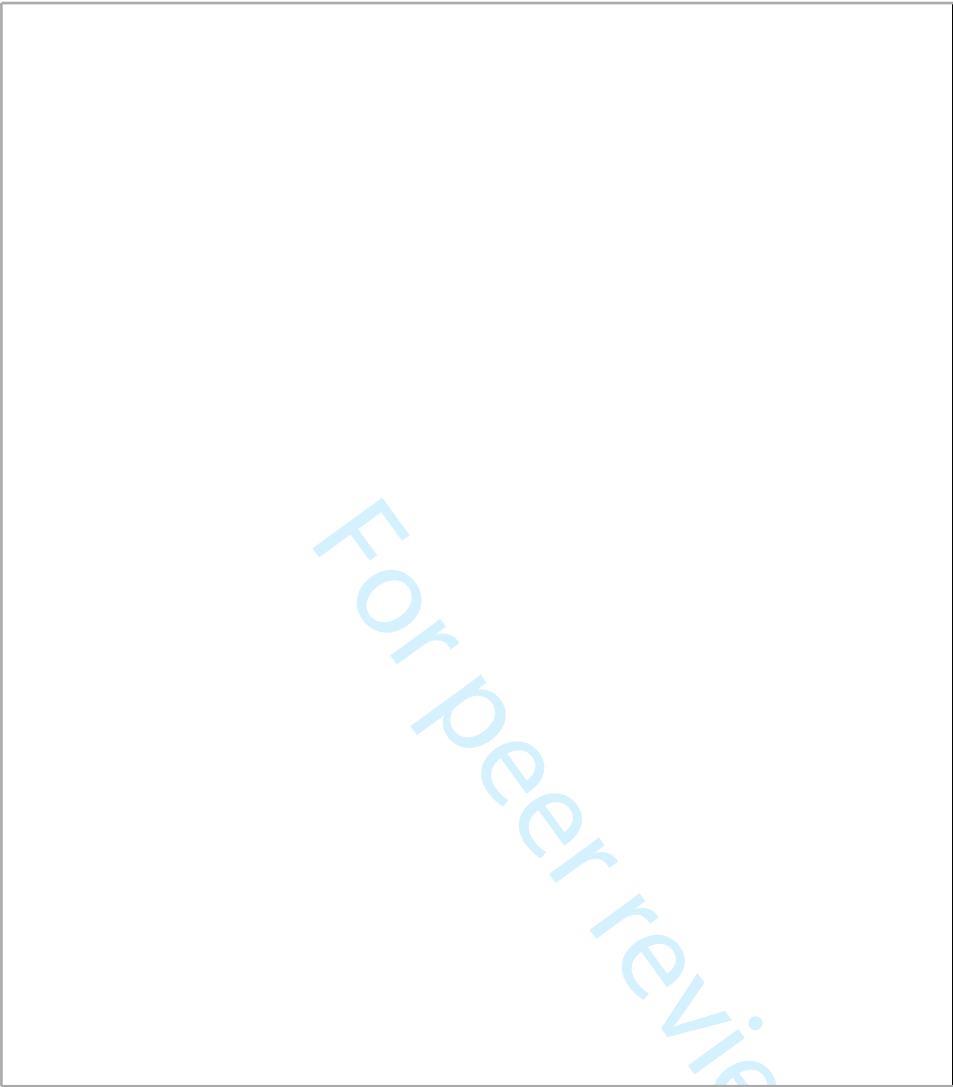

For peer review only

1  
2  
3  
4  
5  
6  
7  
8  
9  
10  
11  
12  
13  
14  
15  
16  
17  
18  
19  
20  
21  
22  
23  
24  
25  
26  
27  
28  
29  
30  
31  
32  
33  
34  
35  
36  
37  
38  
39  
40  
41  
42  
43  
44  
45  
46  
47  
48  
49  
50  
51  
52  
53  
54  
55  
56  
57  
58  
59  
60

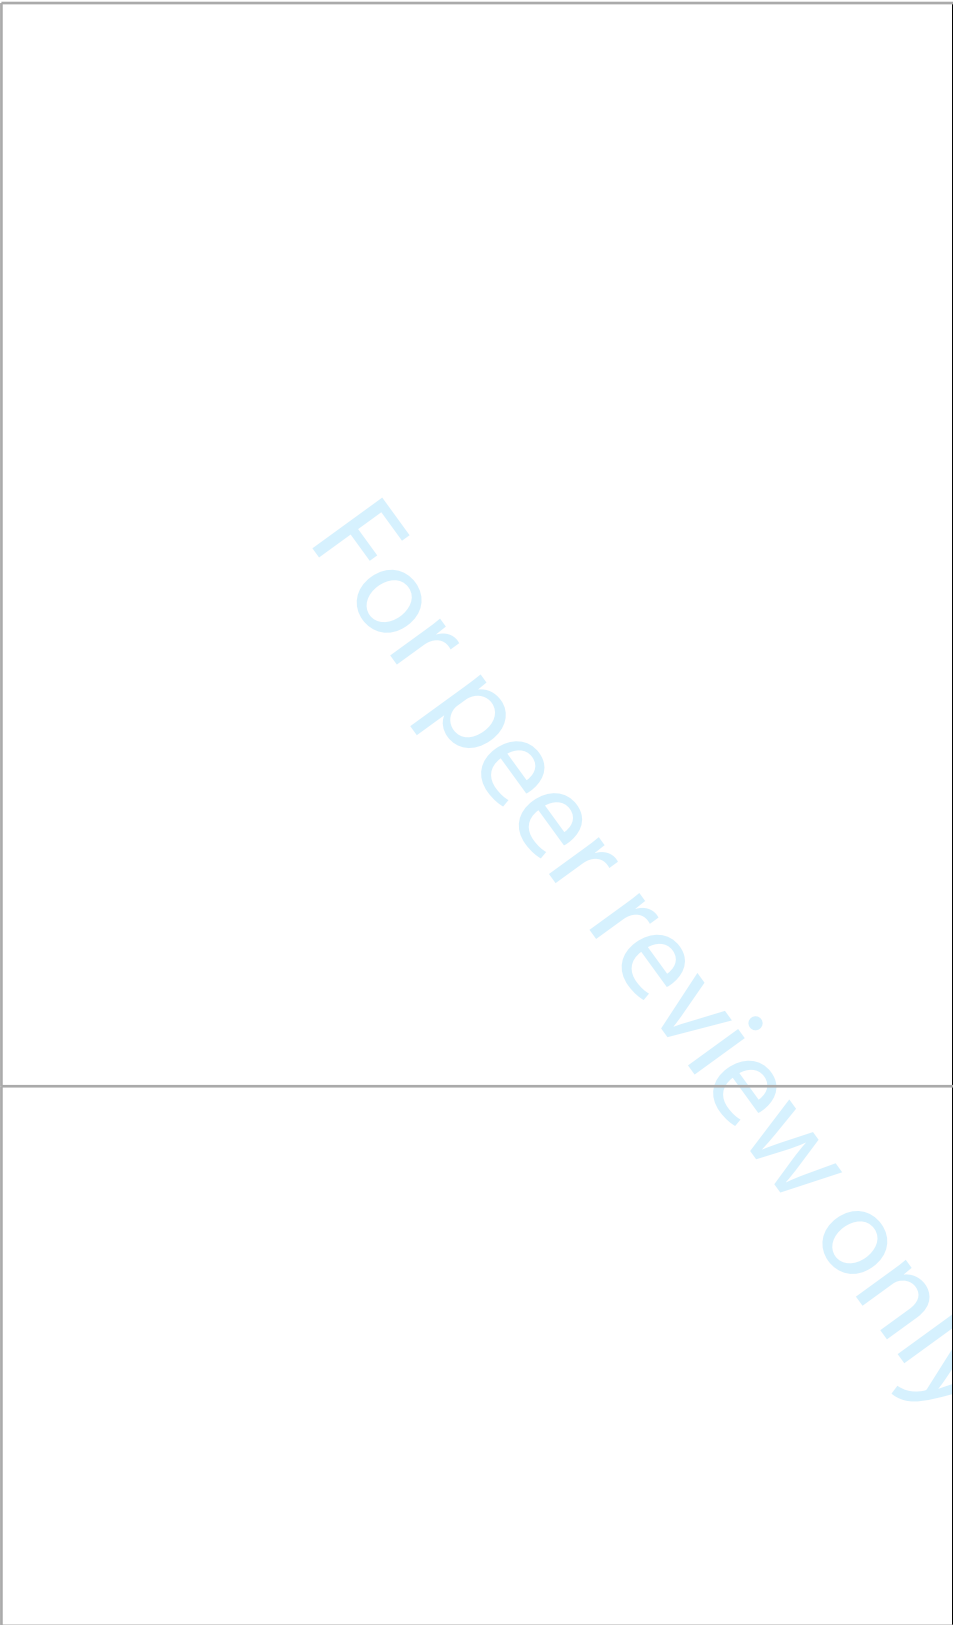

1  
2  
3  
4  
5  
6  
7  
8  
9  
10  
11  
12  
13  
14  
15  
16  
17  
18  
19  
20  
21  
22  
23  
24  
25  
26  
27  
28  
29  
30  
31  
32  
33  
34  
35  
36  
37  
38  
39  
40  
41  
42  
43  
44  
45  
46  
47  
48  
49  
50  
51  
52  
53  
54  
55  
56  
57  
58  
59  
60



For peer review only

1  
2  
3  
4  
5  
6  
7  
8  
9  
10  
11  
12  
13  
14  
15  
16  
17  
18  
19  
20  
21  
22  
23  
24  
25  
26  
27  
28  
29  
30  
31  
32  
33  
34  
35  
36  
37  
38  
39  
40  
41  
42  
43  
44  
45  
46  
47  
48  
49  
50  
51  
52  
53  
54  
55  
56  
57  
58  
59  
60

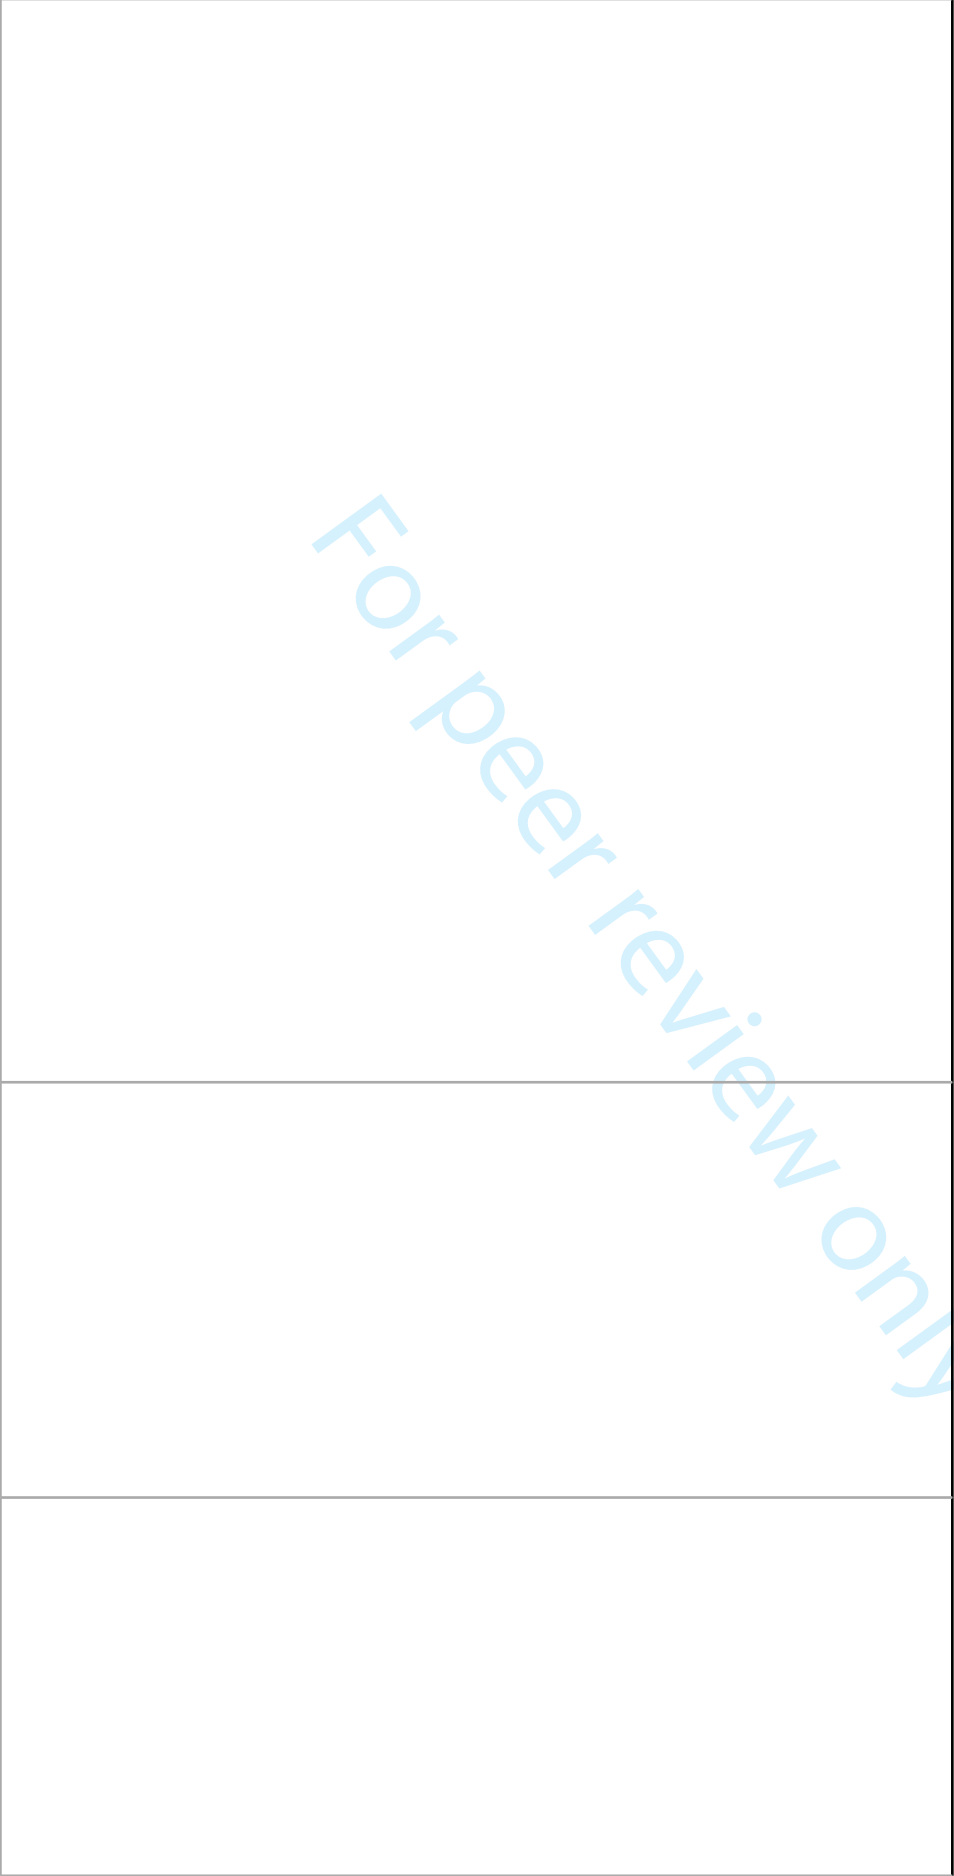

1  
2  
3  
4  
5  
6  
7  
8  
9  
10  
11  
12  
13  
14  
15  
16  
17  
18  
19  
20  
21  
22  
23  
24  
25  
26  
27  
28  
29  
30  
31  
32  
33  
34  
35  
36  
37  
38  
39  
40  
41  
42  
43  
44  
45  
46  
47  
48  
49  
50  
51  
52  
53  
54  
55  
56  
57  
58  
59  
60

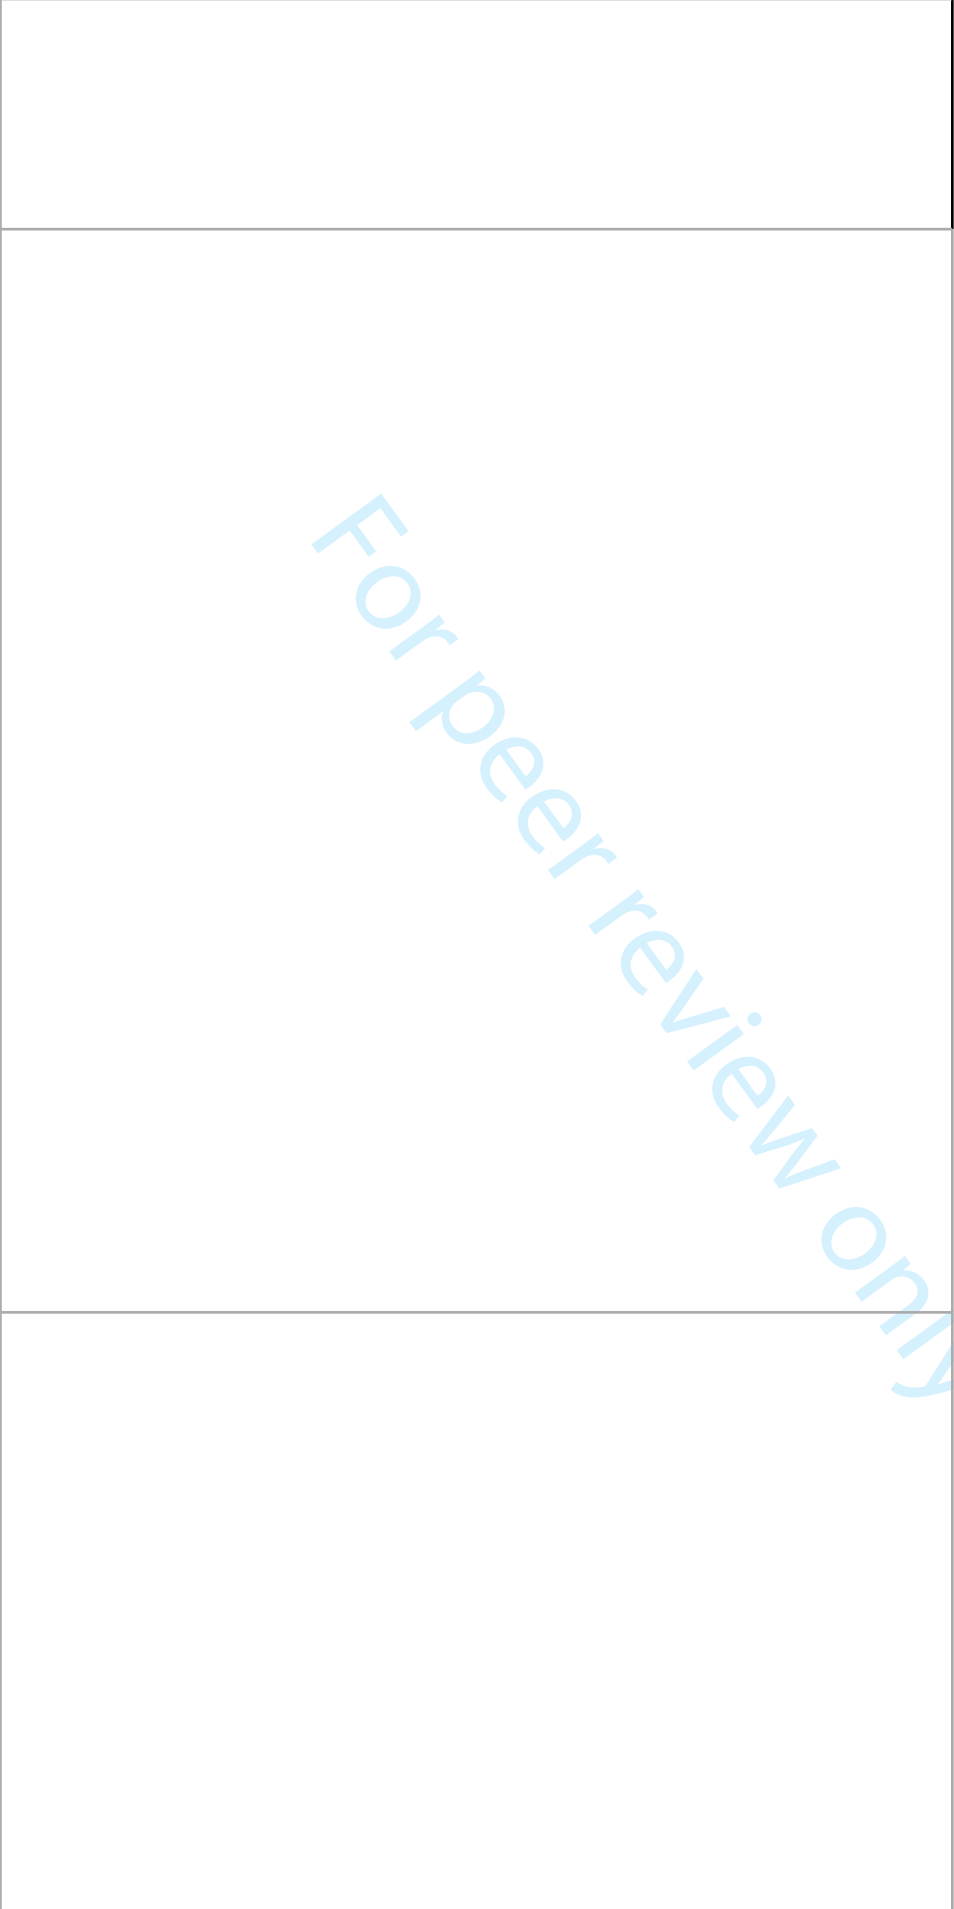



1  
2  
3  
4  
5  
6  
7  
8  
9  
10  
11  
12  
13  
14  
15  
16  
17  
18  
19  
20  
21  
22  
23  
24  
25  
26  
27  
28  
29  
30  
31  
32  
33  
34  
35  
36  
37  
38  
39  
40  
41  
42  
43  
44  
45  
46  
47  
48  
49  
50  
51  
52  
53  
54  
55  
56  
57  
58  
59  
60

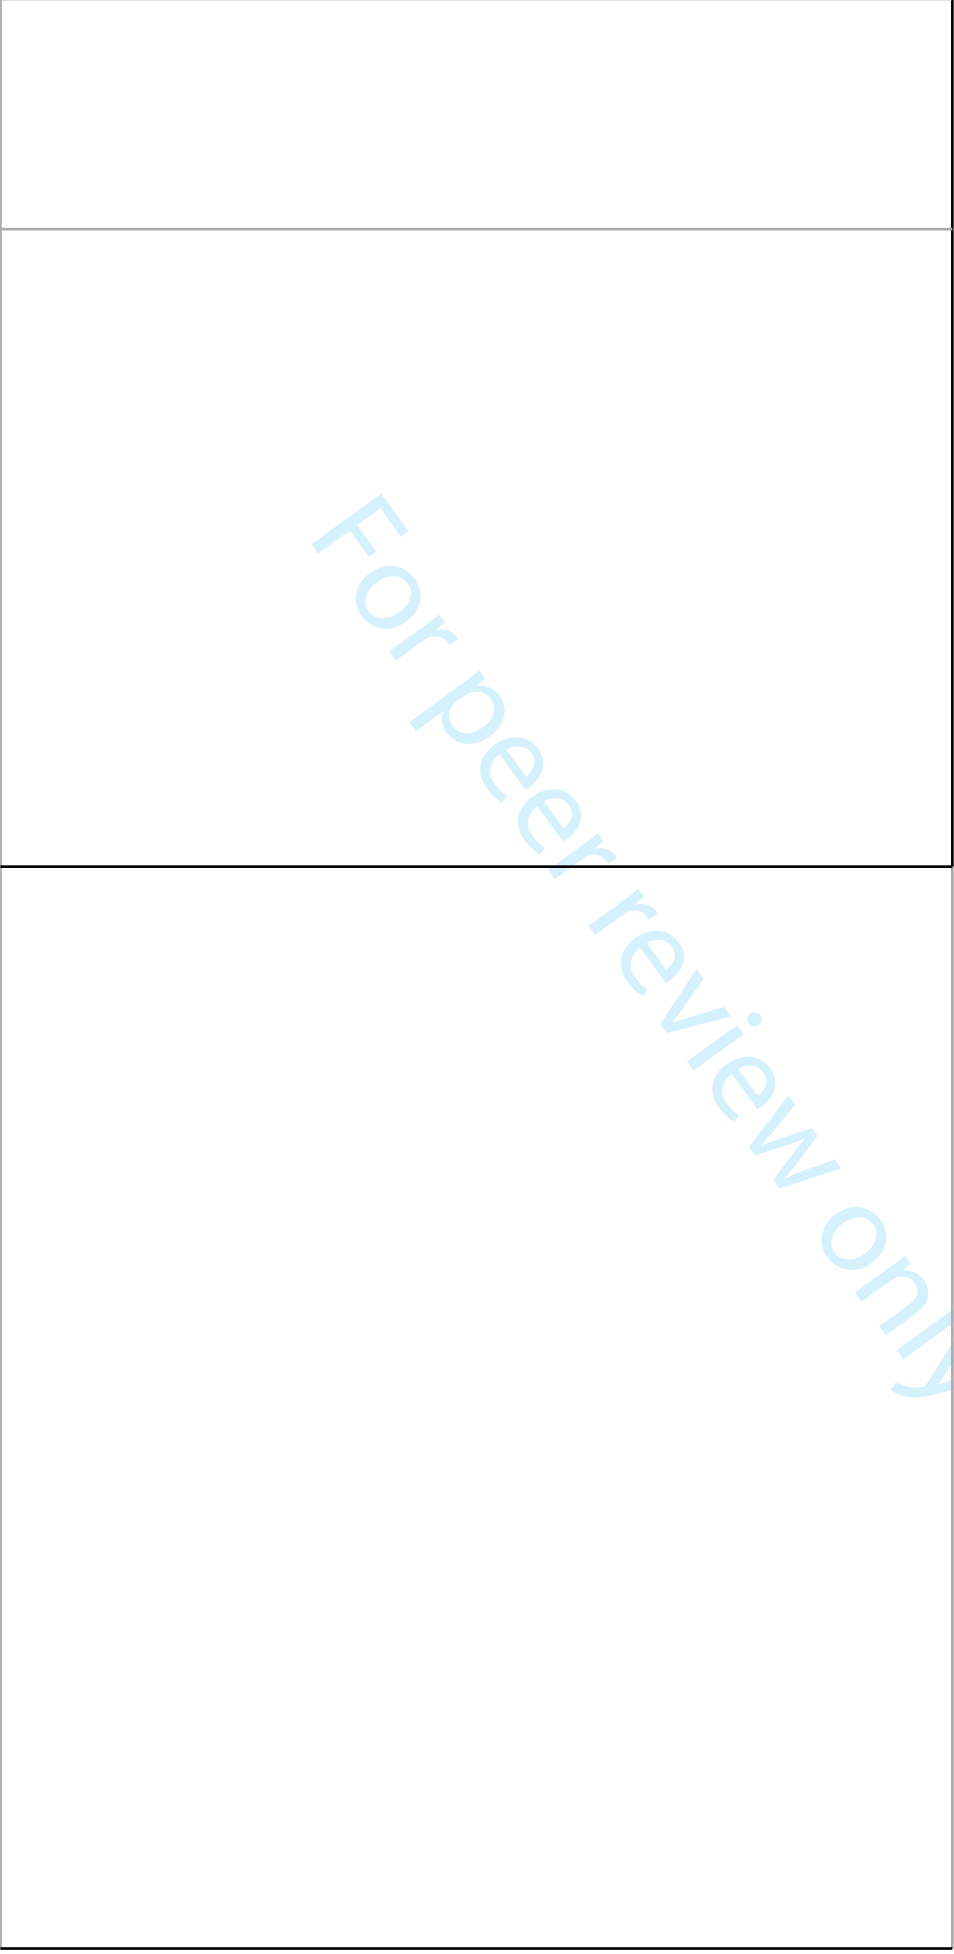

1  
2  
3  
4  
5  
6  
7  
8  
9  
10  
11  
12  
13  
14  
15  
16  
17  
18  
19  
20  
21  
22  
23  
24  
25  
26  
27  
28  
29  
30  
31  
32  
33  
34  
35  
36  
37  
38  
39  
40  
41  
42  
43  
44  
45  
46  
47  
48  
49  
50  
51  
52  
53  
54  
55  
56  
57  
58  
59  
60

|  |
|--|
|  |
|  |
|  |

For peer review only

1  
2  
3  
4  
5  
6  
7  
8  
9  
10  
11  
12  
13  
14  
15  
16  
17  
18  
19  
20  
21  
22  
23  
24  
25  
26  
27  
28  
29  
30  
31  
32  
33  
34  
35  
36  
37  
38  
39  
40  
41  
42  
43  
44  
45  
46  
47  
48  
49  
50  
51  
52  
53  
54  
55  
56  
57  
58  
59  
60

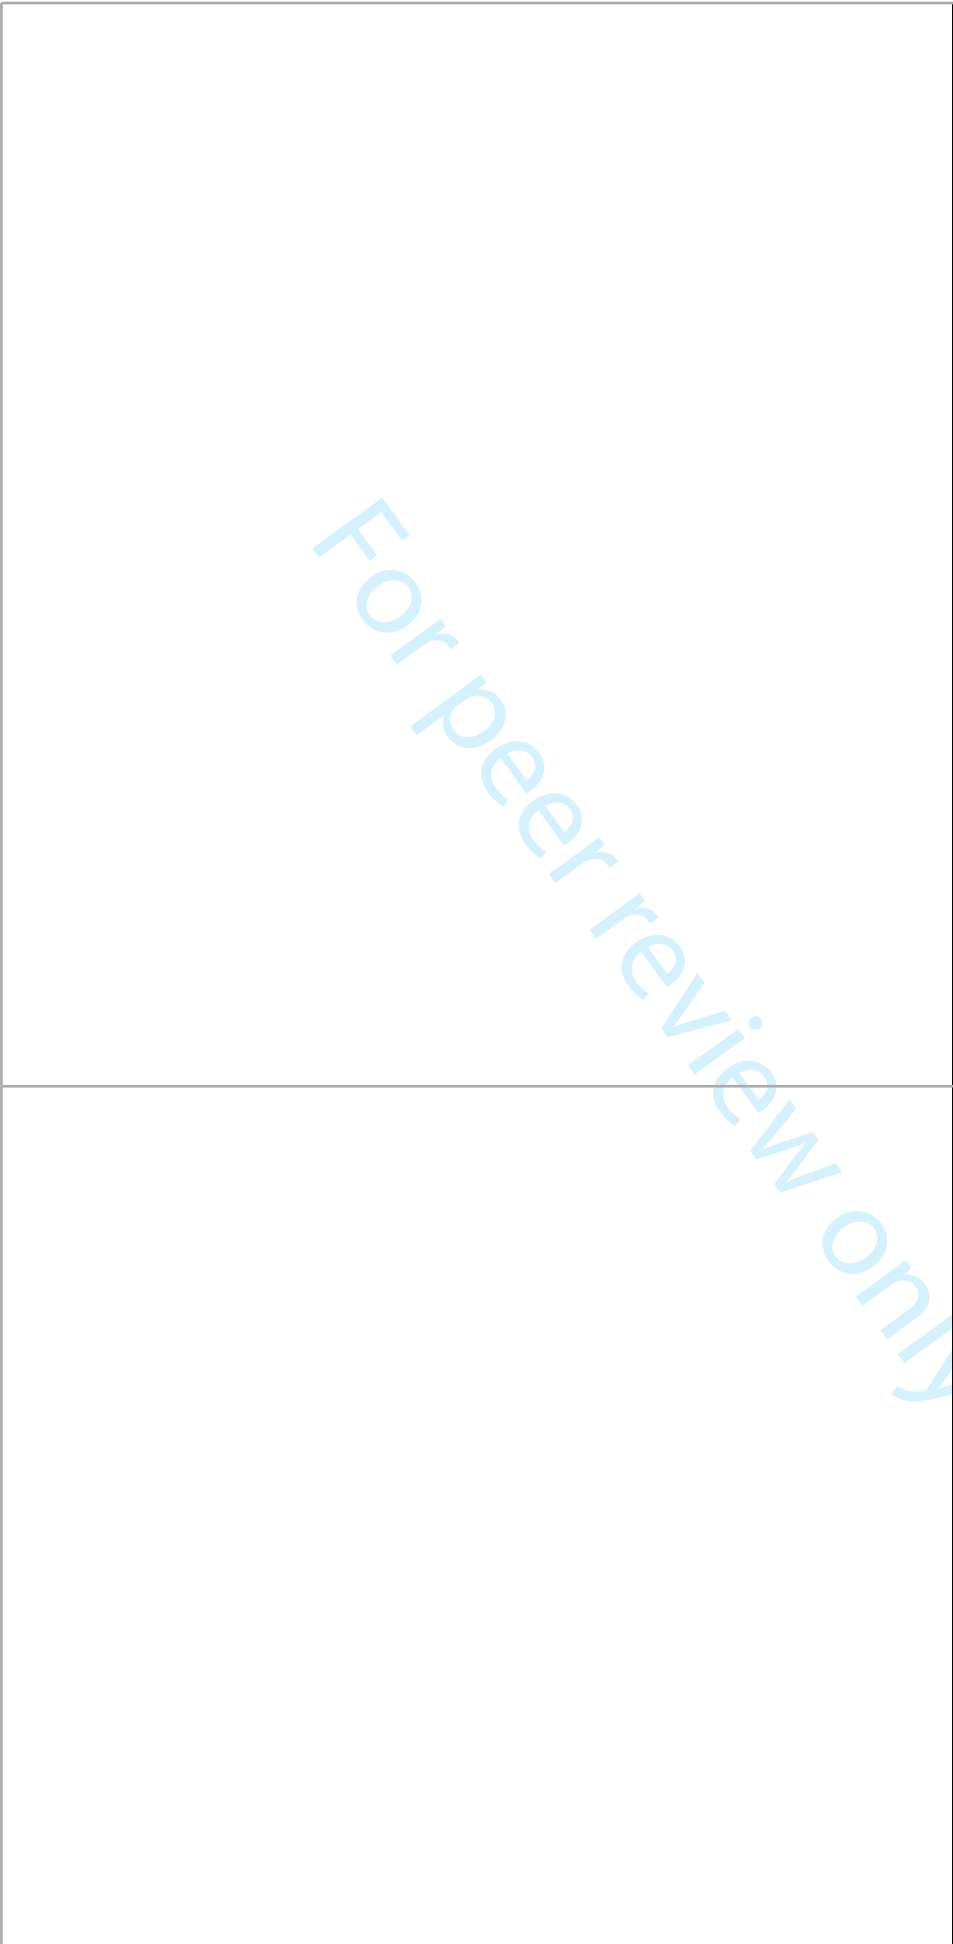

1  
2  
3  
4  
5  
6  
7  
8  
9  
10  
11  
12  
13  
14  
15  
16  
17  
18  
19  
20  
21  
22  
23  
24  
25  
26  
27  
28  
29  
30  
31  
32  
33  
34  
35  
36  
37  
38  
39  
40  
41  
42  
43  
44  
45  
46  
47  
48  
49  
50  
51  
52  
53  
54  
55  
56  
57  
58  
59  
60

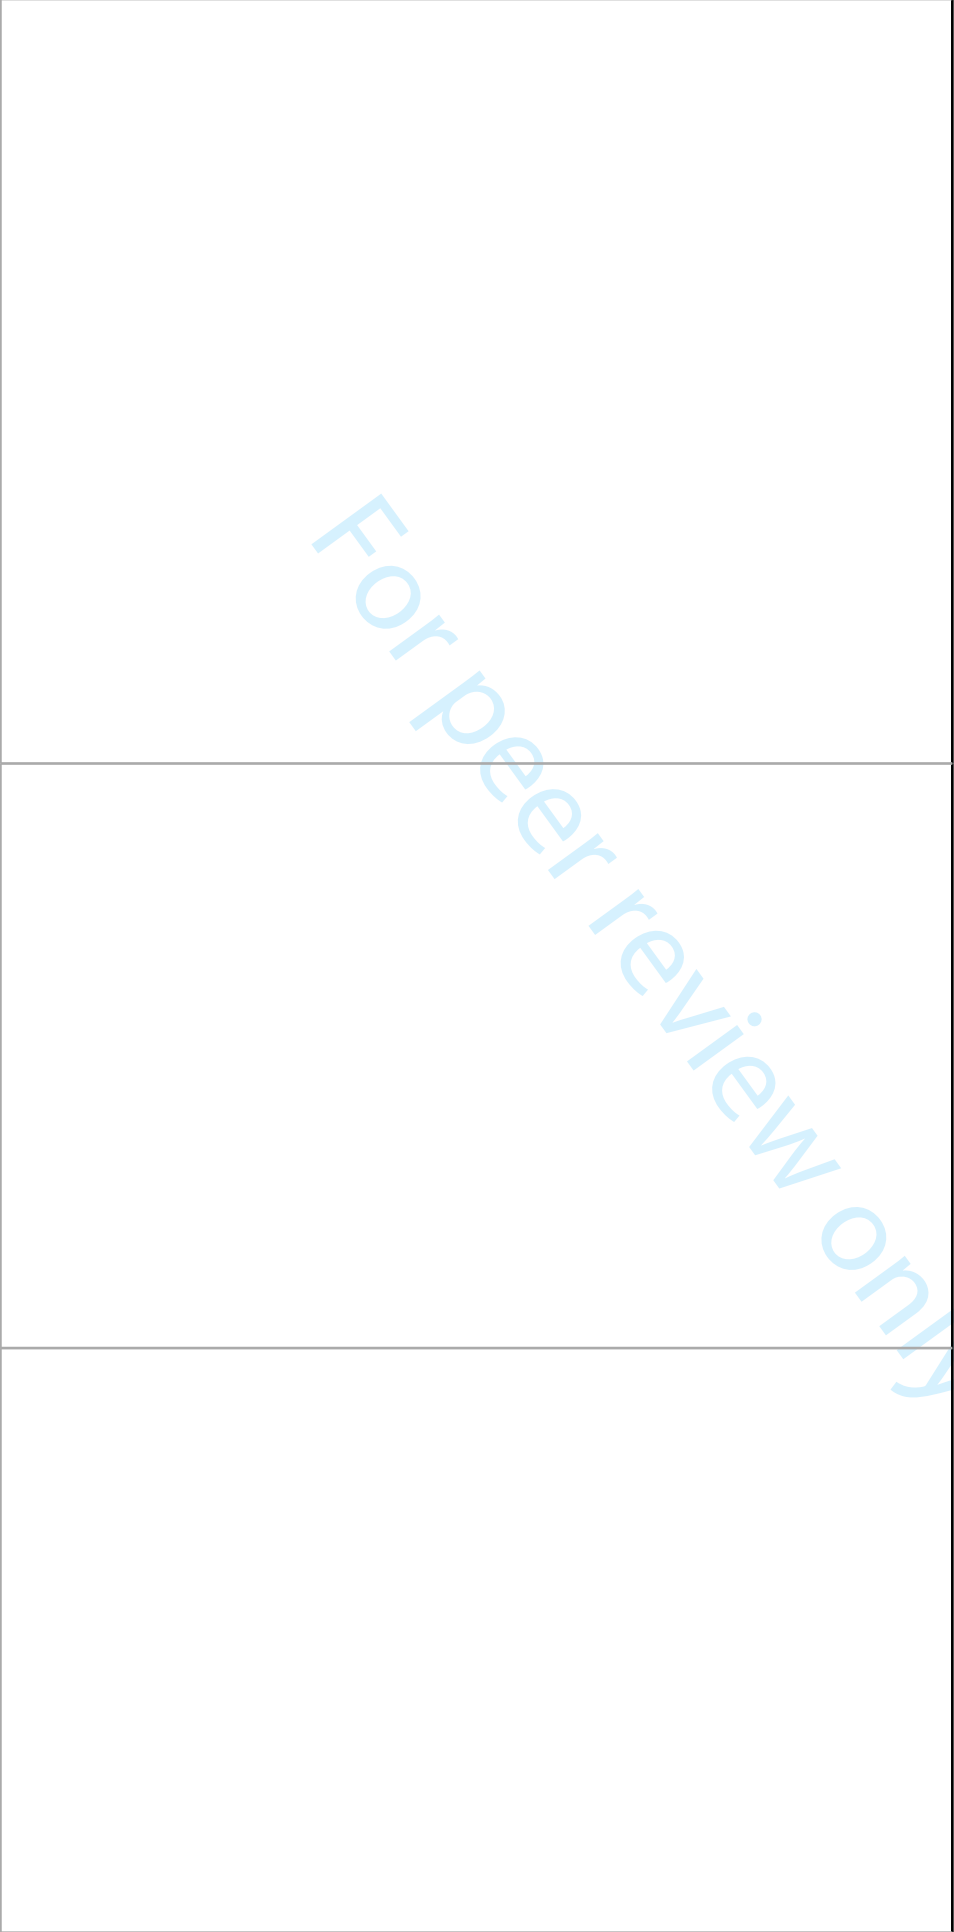

1  
2  
3  
4  
5  
6  
7  
8  
9  
10  
11  
12  
13  
14  
15  
16  
17  
18  
19  
20  
21  
22  
23  
24  
25  
26  
27  
28  
29  
30  
31  
32  
33  
34  
35  
36  
37  
38  
39  
40  
41  
42  
43  
44  
45  
46  
47  
48  
49  
50  
51  
52  
53  
54  
55  
56  
57  
58  
59  
60

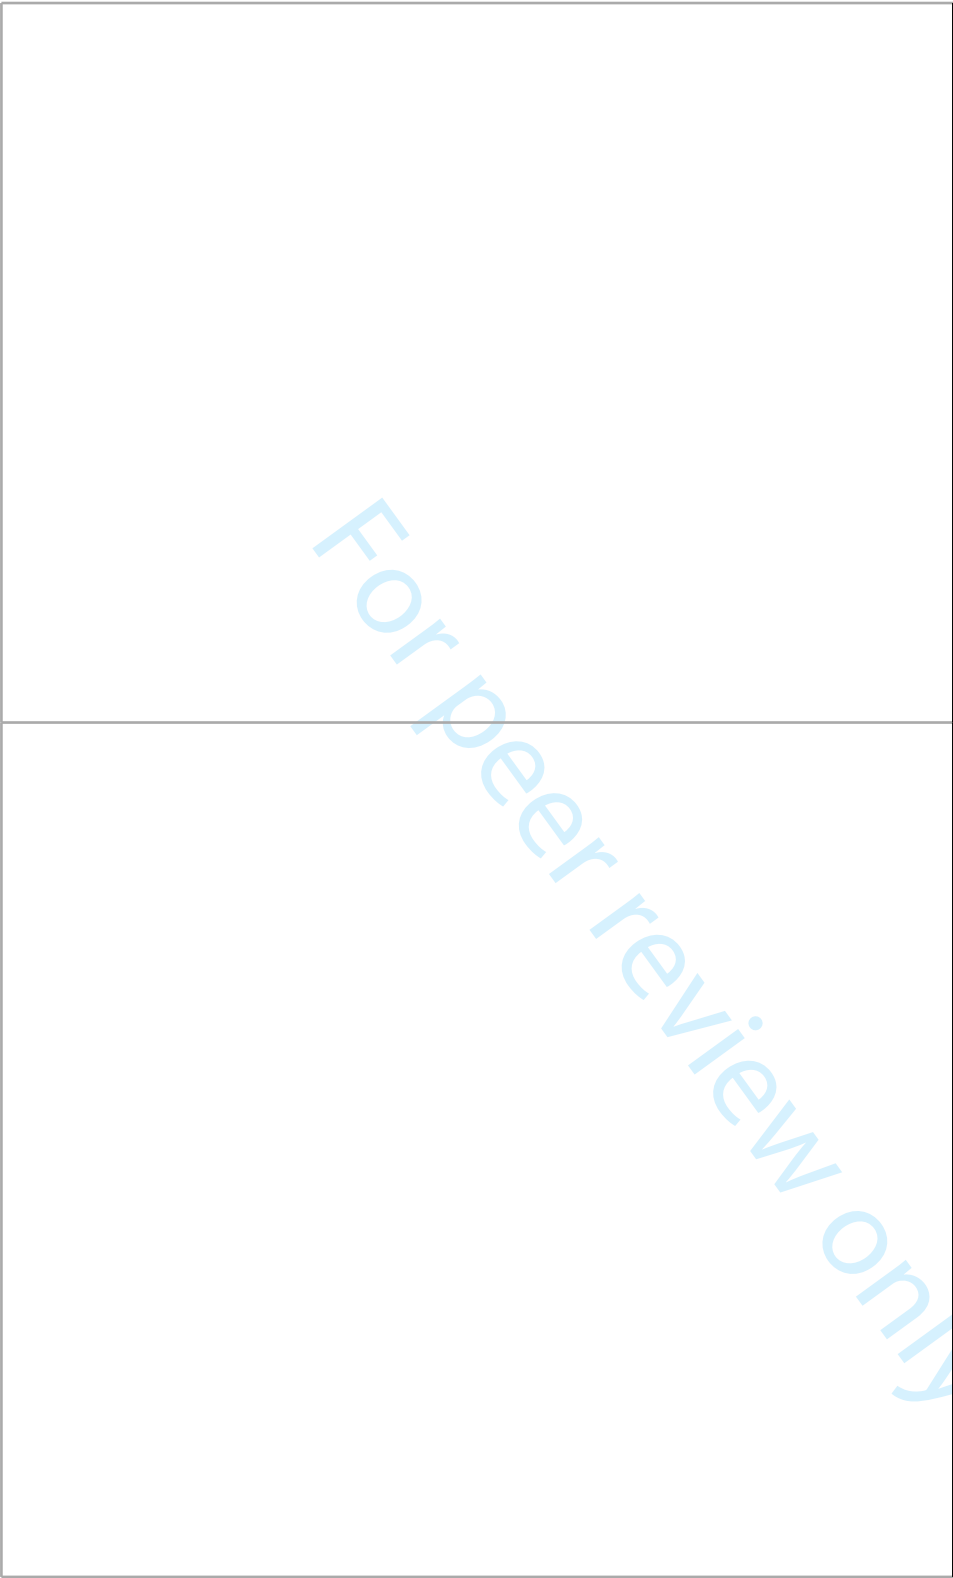

1  
2  
3  
4  
5  
6  
7  
8  
9  
10  
11  
12  
13  
14  
15  
16  
17  
18  
19  
20  
21  
22  
23  
24  
25  
26  
27  
28  
29  
30  
31  
32  
33  
34  
35  
36  
37  
38  
39  
40  
41  
42  
43  
44  
45  
46  
47  
48  
49  
50  
51  
52  
53  
54  
55  
56  
57  
58  
59  
60

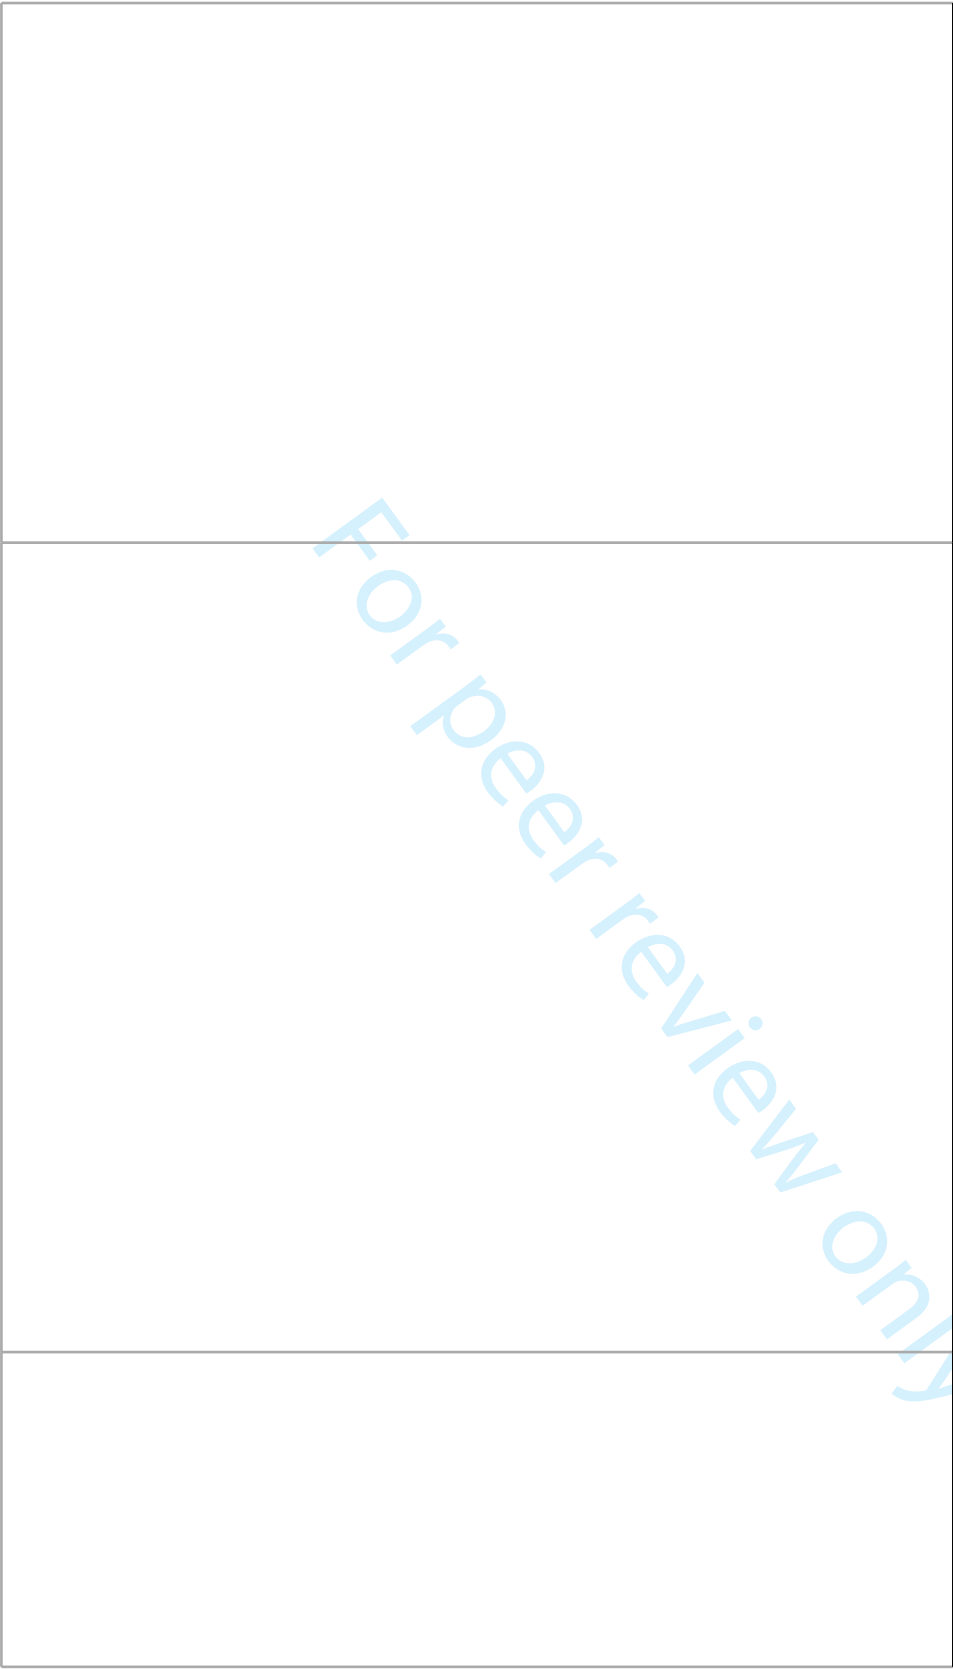

1  
2  
3  
4  
5  
6  
7  
8  
9  
10  
11  
12  
13  
14  
15  
16  
17  
18  
19  
20  
21  
22  
23  
24  
25  
26  
27  
28  
29  
30  
31  
32  
33  
34  
35  
36  
37  
38  
39  
40  
41  
42  
43  
44  
45  
46  
47  
48  
49  
50  
51  
52  
53  
54  
55  
56  
57  
58  
59  
60

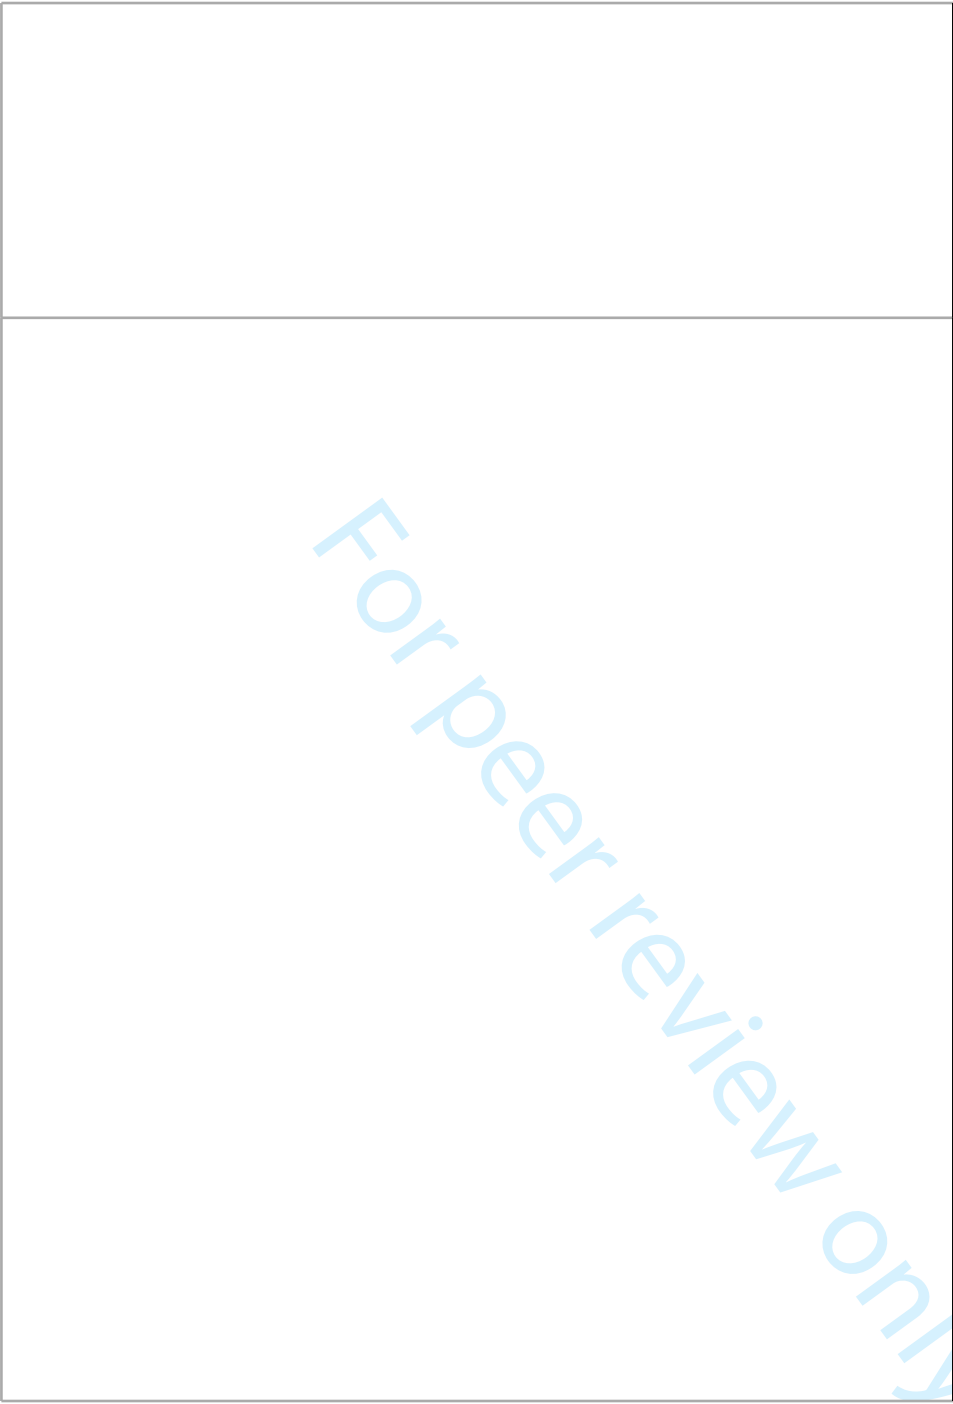

1  
2  
3  
4  
5  
6  
7  
8  
9  
10  
11  
12  
13  
14  
15  
16  
17  
18  
19  
20  
21  
22  
23  
24  
25  
26  
27  
28  
29  
30  
31  
32  
33  
34  
35  
36  
37  
38  
39  
40  
41  
42  
43  
44  
45  
46  
47  
48  
49  
50  
51  
52  
53  
54  
55  
56  
57  
58  
59  
60

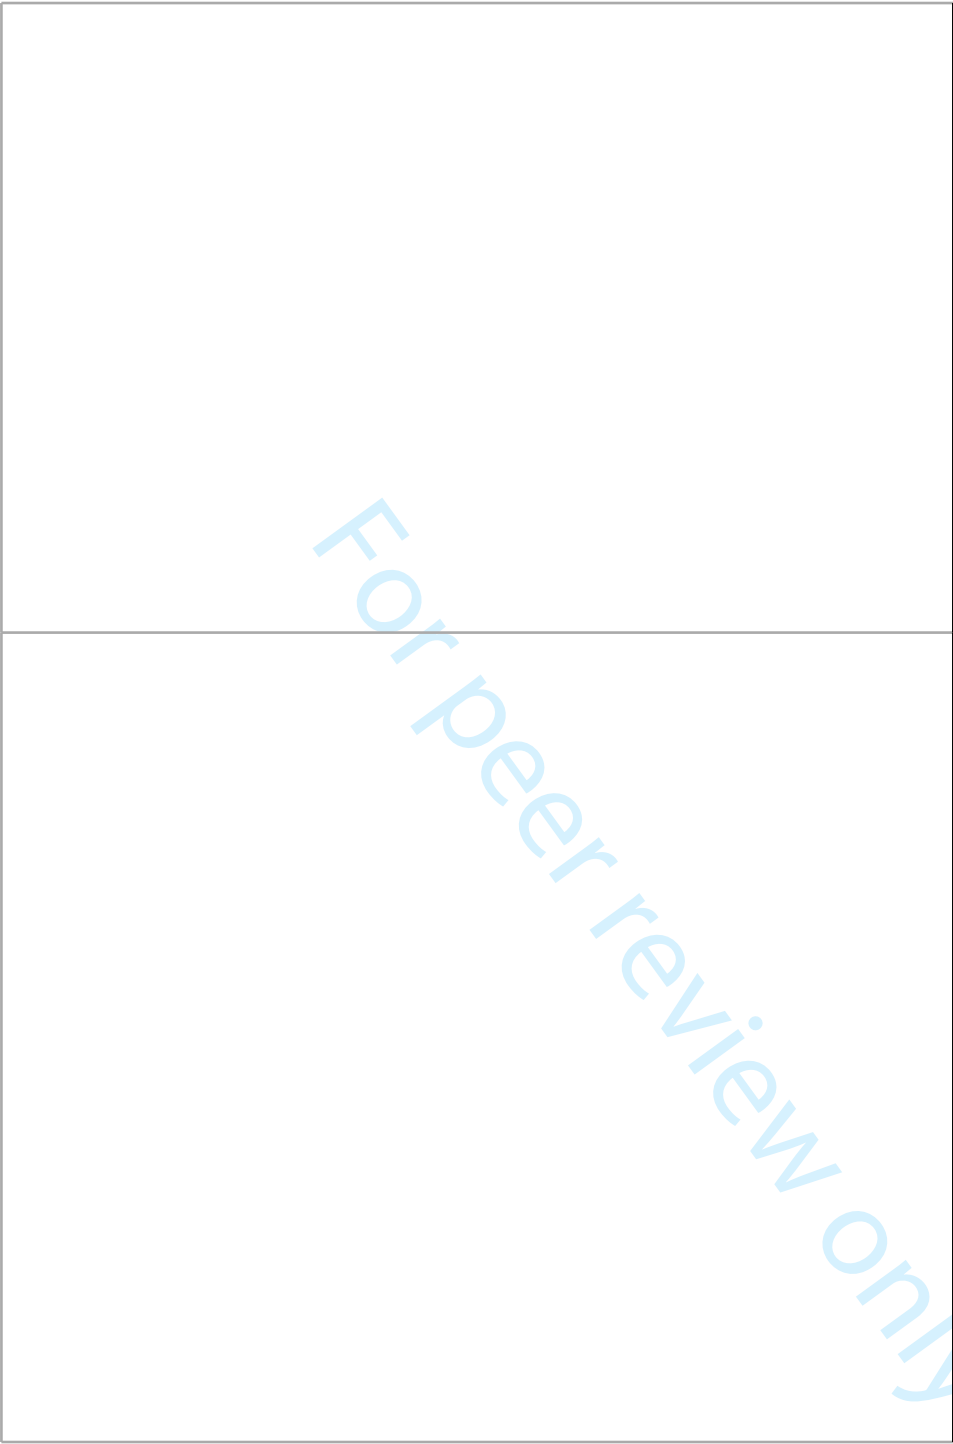



1  
2  
3  
4  
5  
6  
7  
8  
9  
10  
11  
12  
13  
14  
15  
16  
17  
18  
19  
20  
21  
22  
23  
24  
25  
26  
27  
28  
29  
30  
31  
32  
33  
34  
35  
36  
37  
38  
39  
40  
41  
42  
43  
44  
45  
46  
47  
48  
49  
50  
51  
52  
53  
54  
55  
56  
57  
58  
59  
60

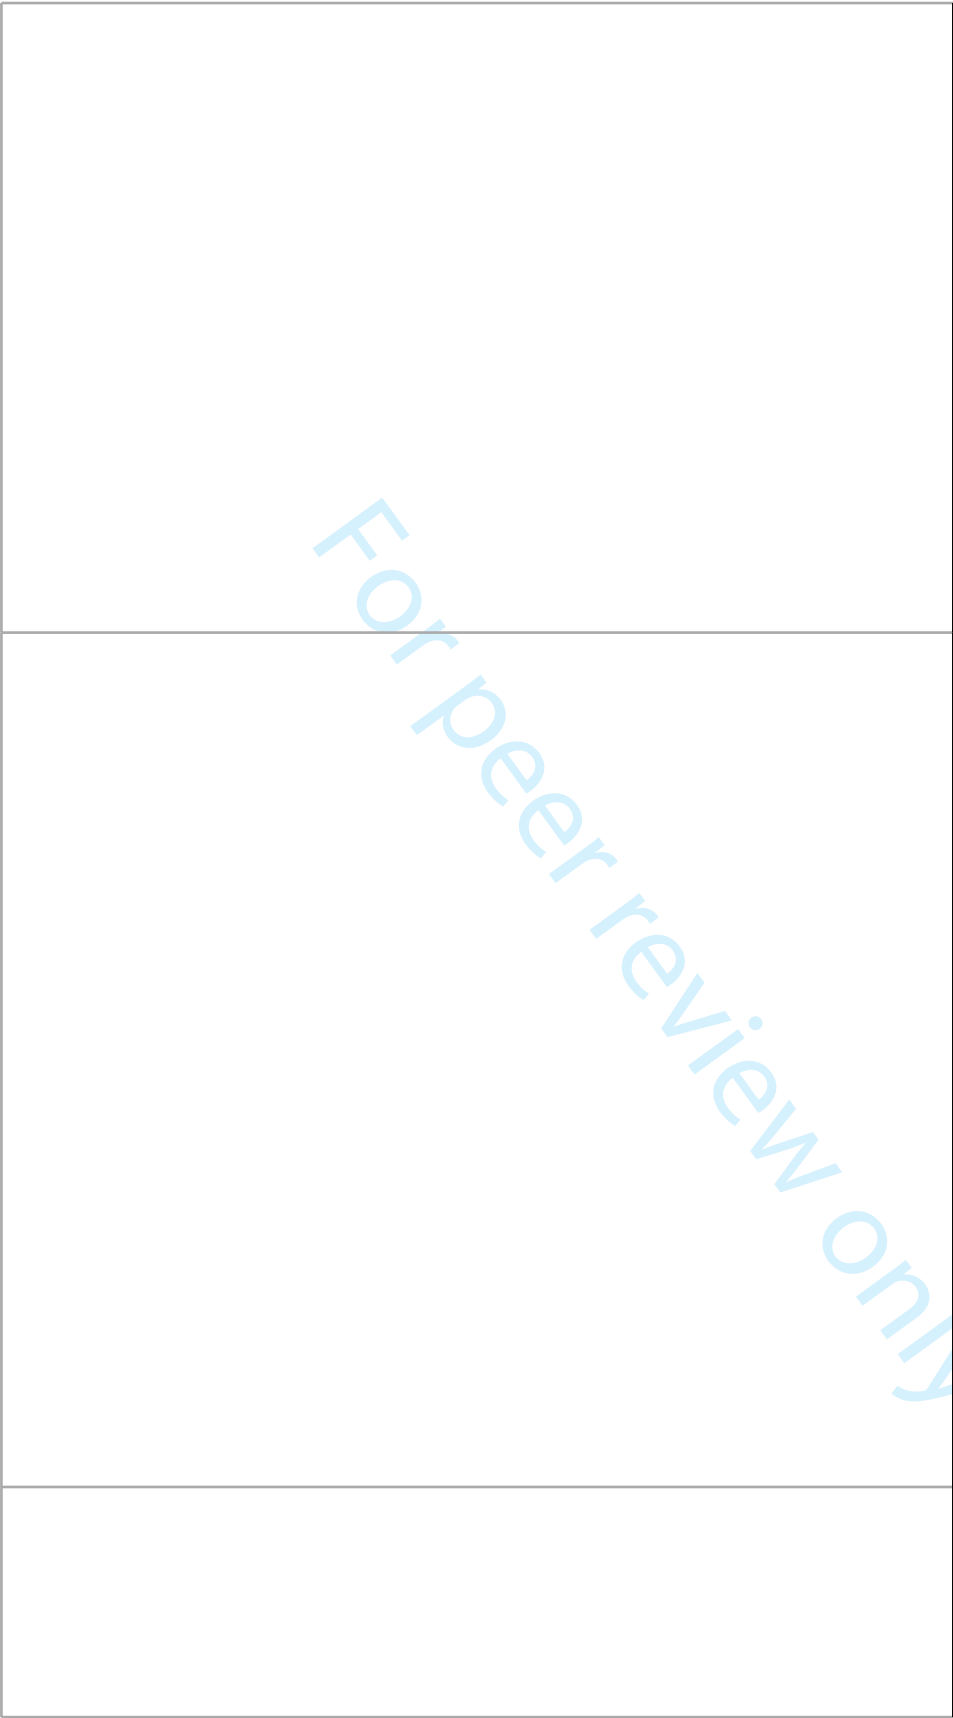

1  
2  
3  
4  
5  
6  
7  
8  
9  
10  
11  
12  
13  
14  
15  
16  
17  
18  
19  
20  
21  
22  
23  
24  
25  
26  
27  
28  
29  
30  
31  
32  
33  
34  
35  
36  
37  
38  
39  
40  
41  
42  
43  
44  
45  
46  
47  
48  
49  
50  
51  
52  
53  
54  
55  
56  
57  
58  
59  
60

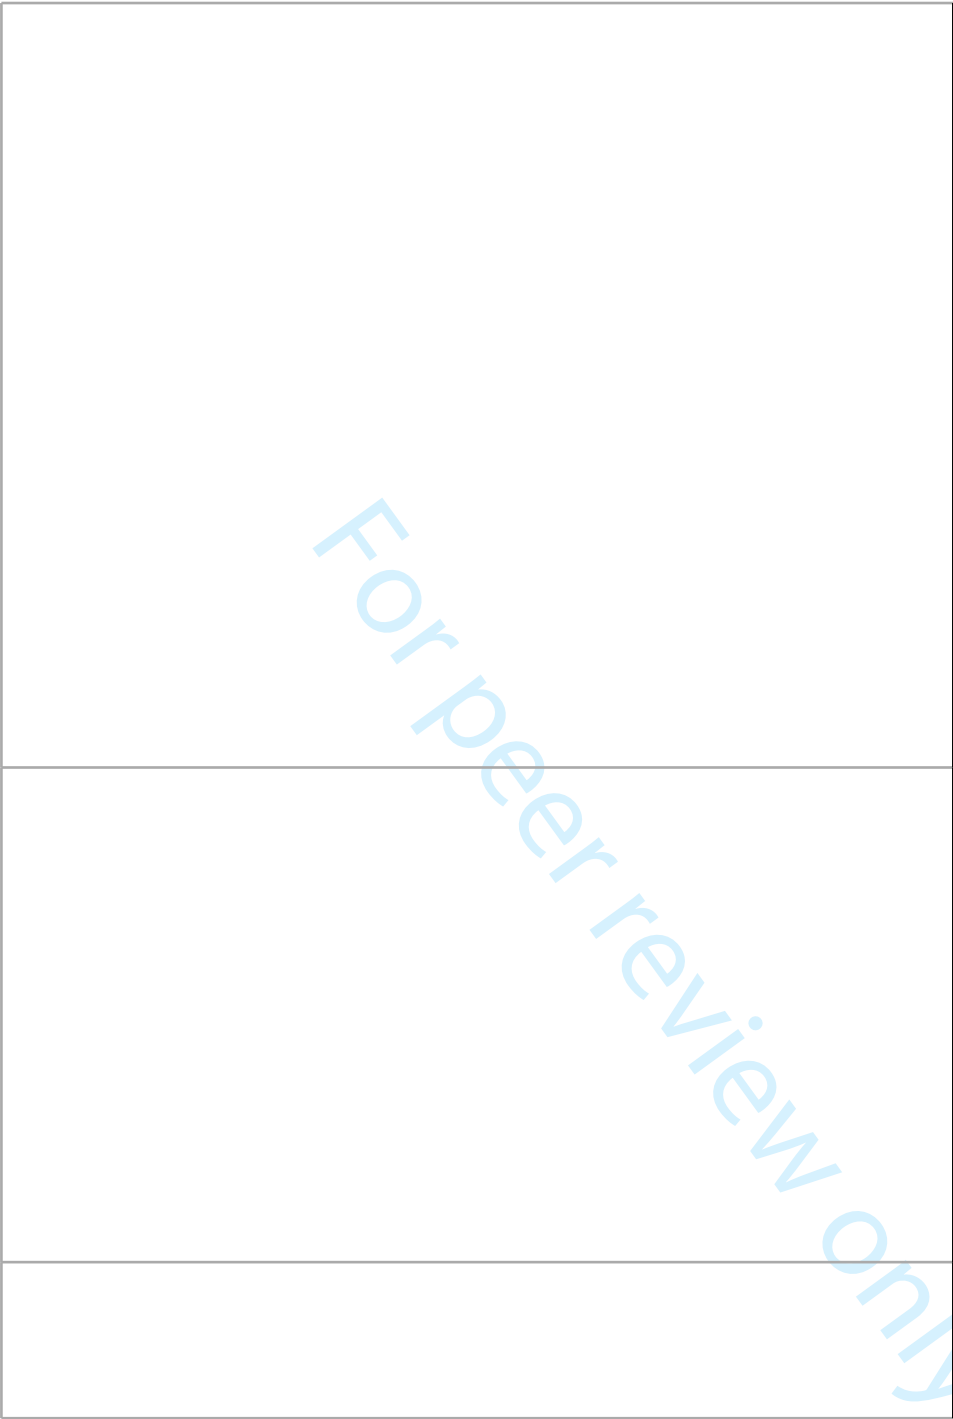

1  
2  
3  
4  
5  
6  
7  
8  
9  
10  
11  
12  
13  
14  
15  
16  
17  
18  
19  
20  
21  
22  
23  
24  
25  
26  
27  
28  
29  
30  
31  
32  
33  
34  
35  
36  
37  
38  
39  
40  
41  
42  
43  
44  
45  
46  
47  
48  
49  
50  
51  
52  
53  
54  
55  
56  
57  
58  
59  
60

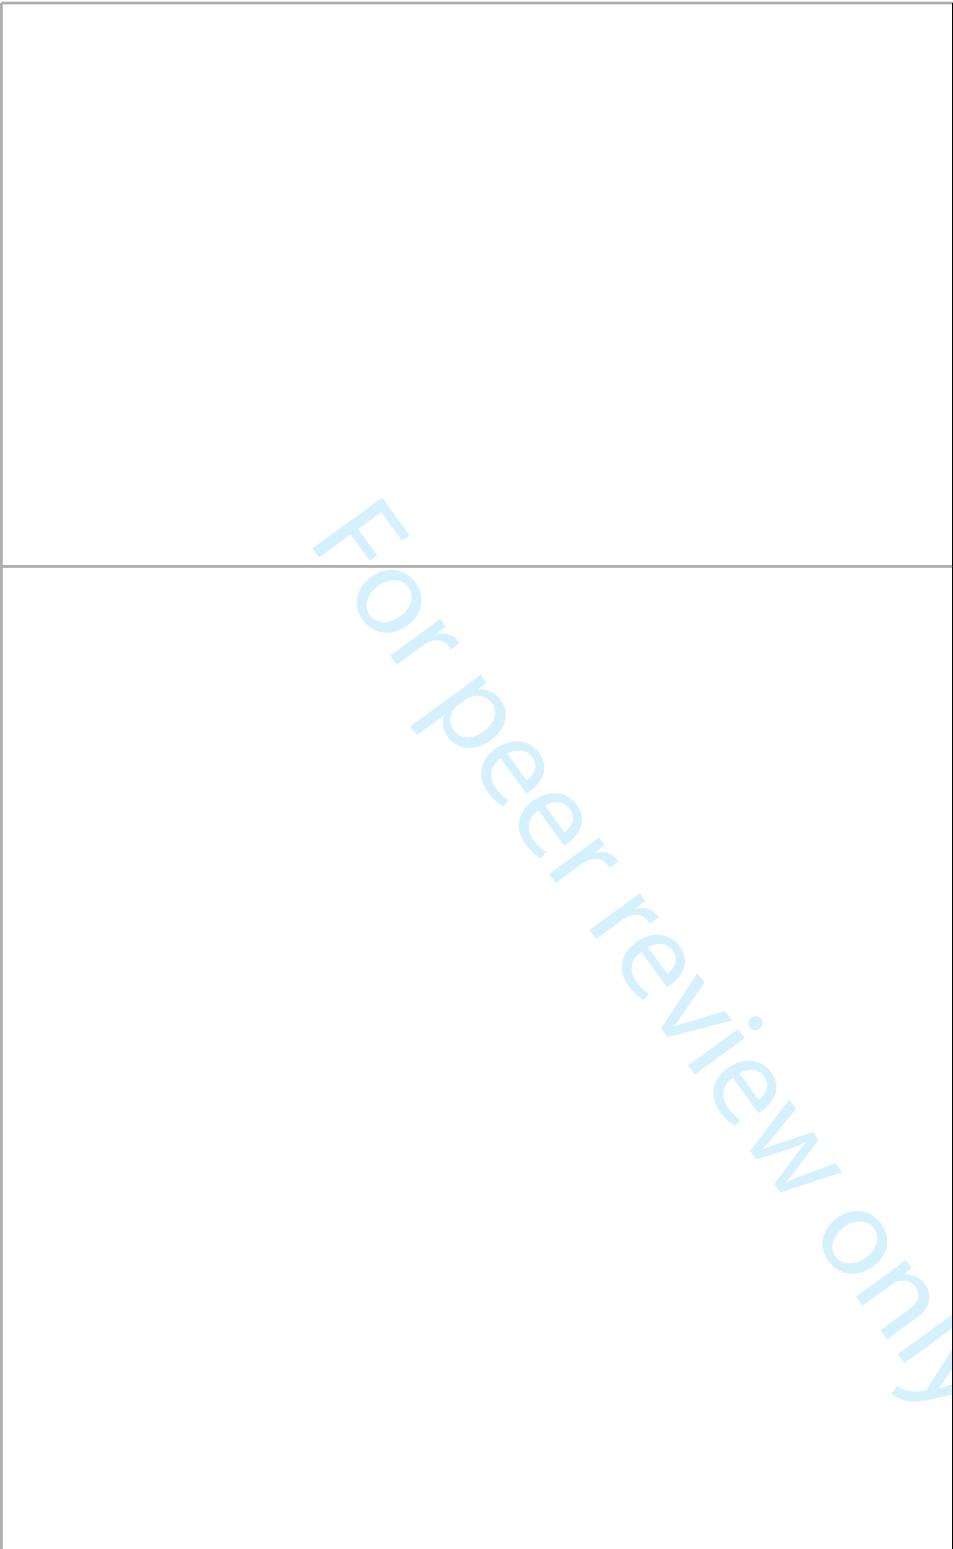

For peer review only

1  
2  
3  
4  
5  
6  
7  
8  
9  
10  
11  
12  
13  
14  
15  
16  
17  
18  
19  
20  
21  
22  
23  
24  
25  
26  
27  
28  
29  
30  
31  
32  
33  
34  
35  
36  
37  
38  
39  
40  
41  
42  
43  
44  
45  
46  
47  
48  
49  
50  
51  
52  
53  
54  
55  
56  
57  
58  
59  
60

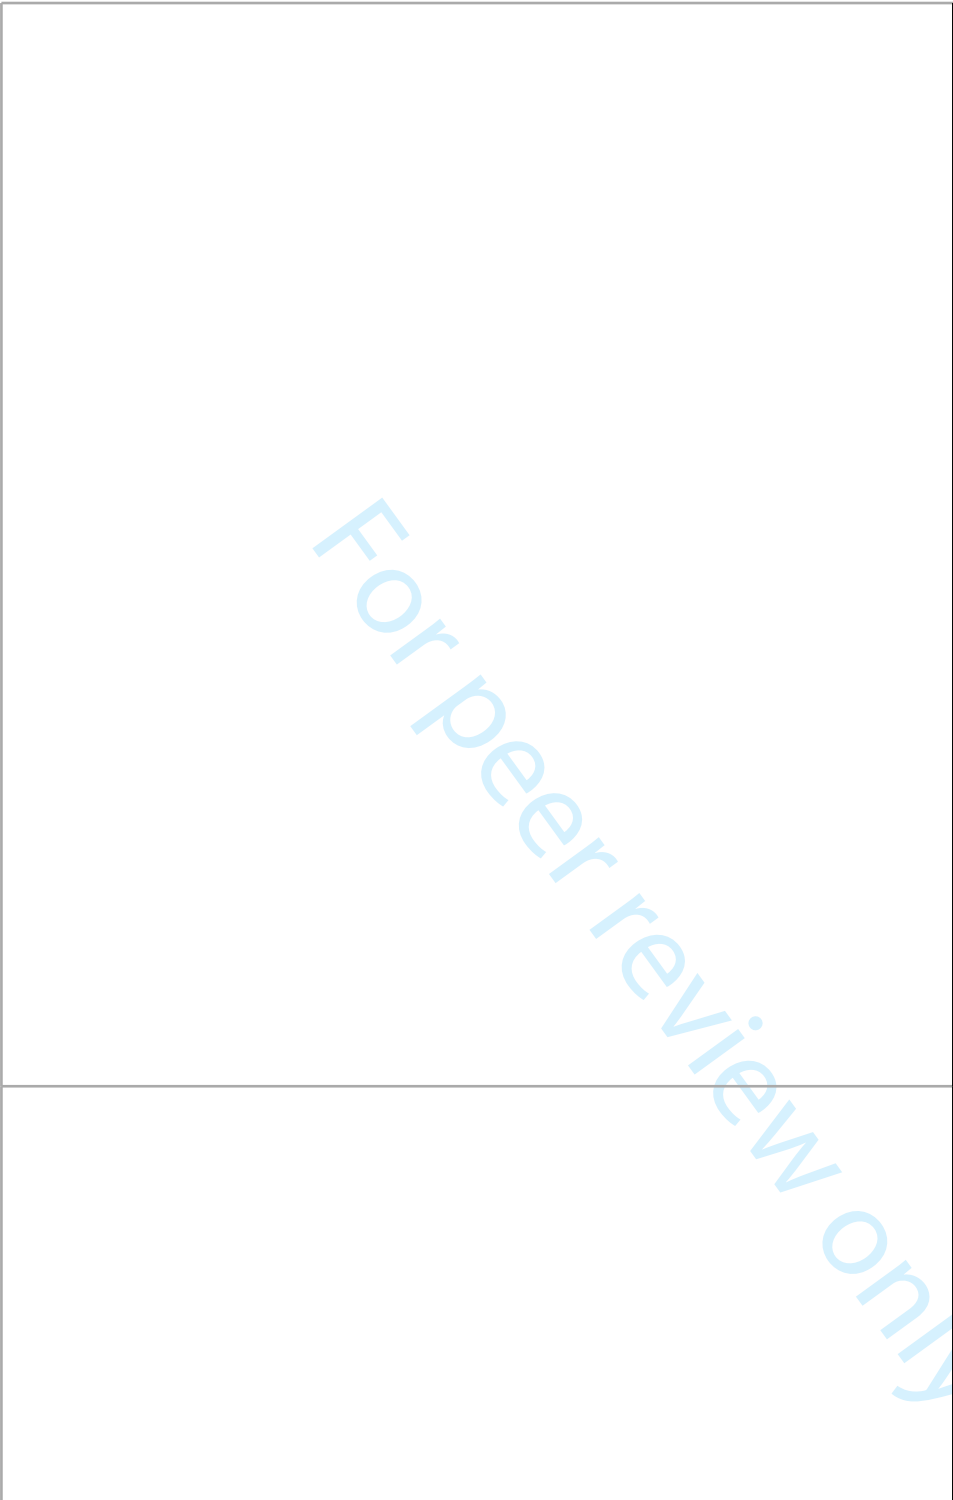

1  
2  
3  
4  
5  
6  
7  
8  
9  
10  
11  
12  
13  
14  
15  
16  
17  
18  
19  
20  
21  
22  
23  
24  
25  
26  
27  
28  
29  
30  
31  
32  
33  
34  
35  
36  
37  
38  
39  
40  
41  
42  
43  
44  
45  
46  
47  
48  
49  
50  
51  
52  
53  
54  
55  
56  
57  
58  
59  
60

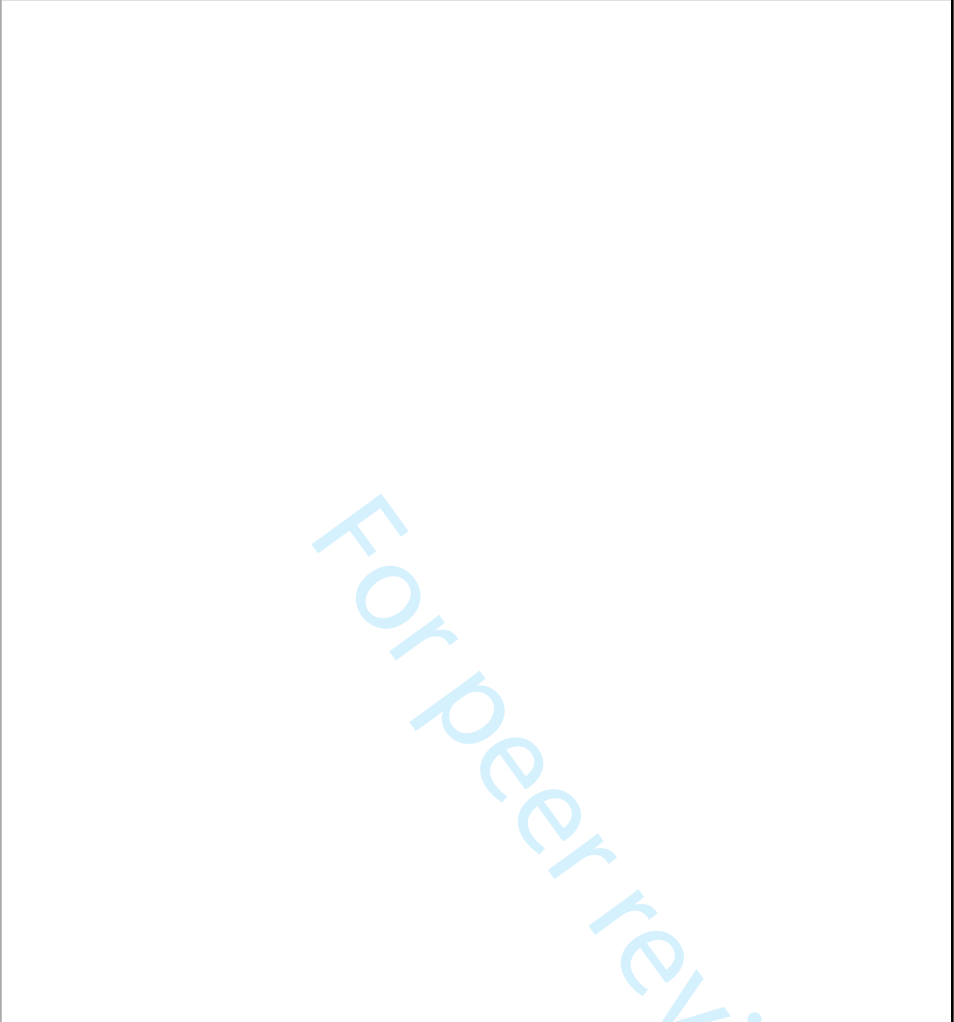

For peer review only

1  
2  
3  
4  
5  
6  
7  
8  
9  
10  
11  
12  
13  
14  
15  
16  
17  
18  
19  
20  
21  
22  
23  
24  
25  
26  
27  
28  
29  
30  
31  
32  
33  
34  
35  
36  
37  
38  
39  
40  
41  
42  
43  
44  
45  
46  
47  
48  
49  
50  
51  
52  
53  
54  
55  
56  
57  
58  
59  
60

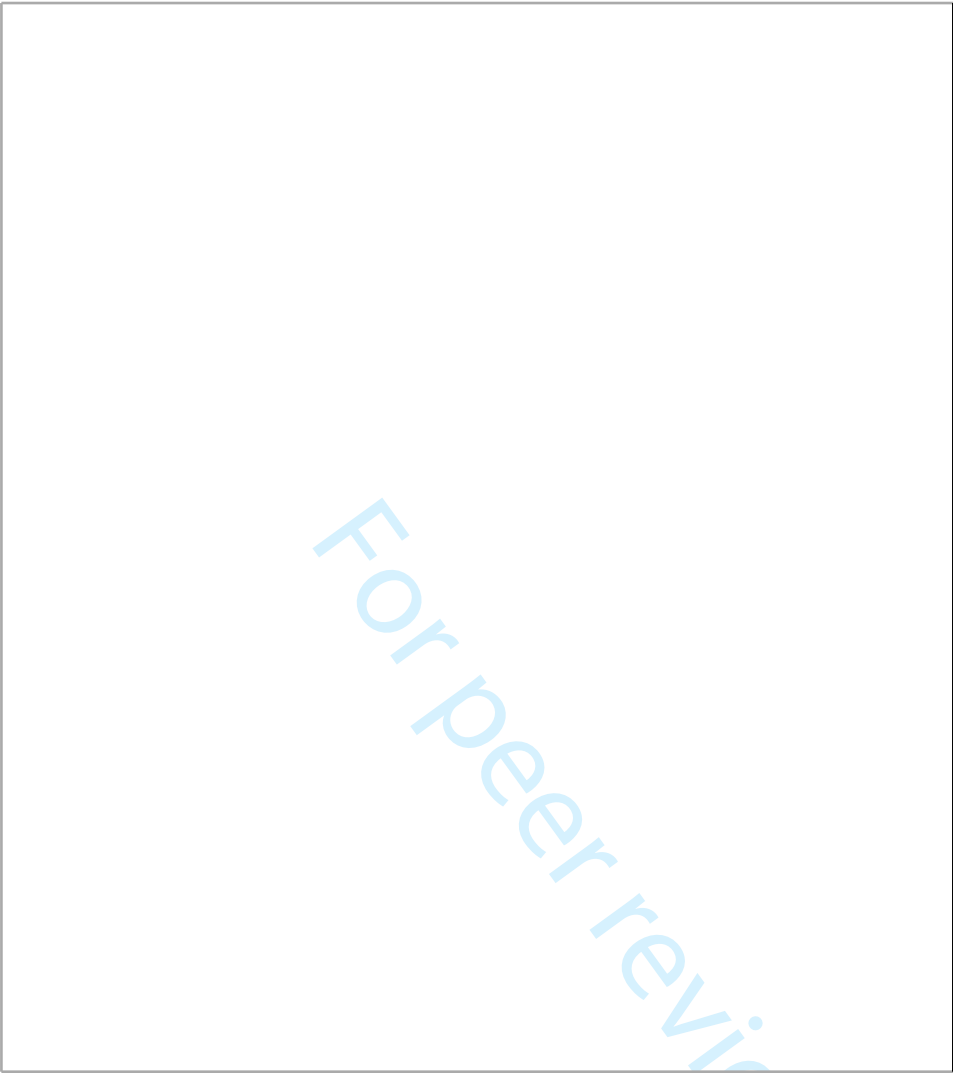

For peer review only

1  
2  
3  
4  
5  
6  
7  
8  
9  
10  
11  
12  
13  
14  
15  
16  
17  
18  
19  
20  
21  
22  
23  
24  
25  
26  
27  
28  
29  
30  
31  
32  
33  
34  
35  
36  
37  
38  
39  
40  
41  
42  
43  
44  
45  
46  
47  
48  
49  
50  
51  
52  
53  
54  
55  
56  
57  
58  
59  
60

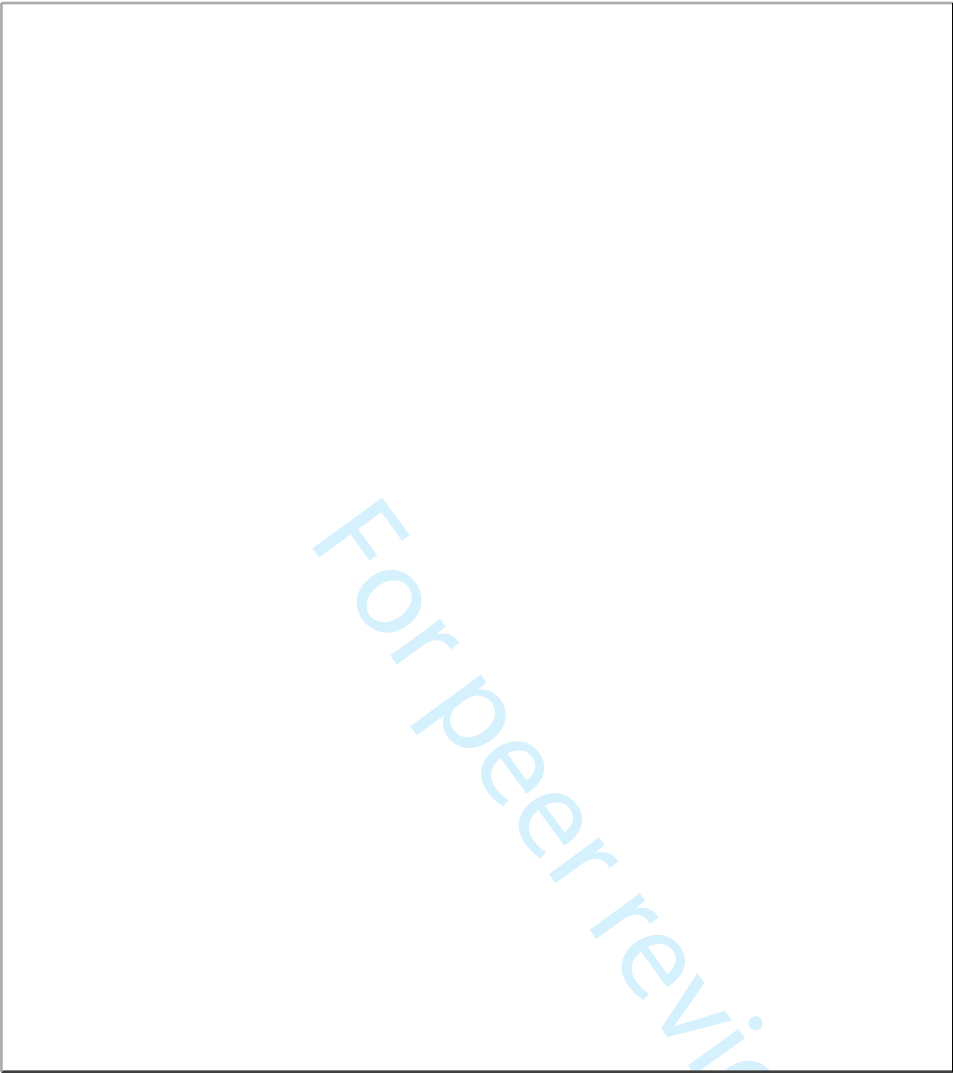

For peer review only





1  
2  
3  
4  
5  
6  
7  
8  
9  
10  
11  
12  
13  
14  
15  
16  
17  
18  
19  
20  
21  
22  
23  
24  
25  
26  
27  
28  
29  
30  
31  
32  
33  
34  
35  
36  
37  
38  
39  
40  
41  
42  
43  
44  
45  
46  
47  
48  
49  
50  
51  
52  
53  
54  
55  
56  
57  
58  
59  
60

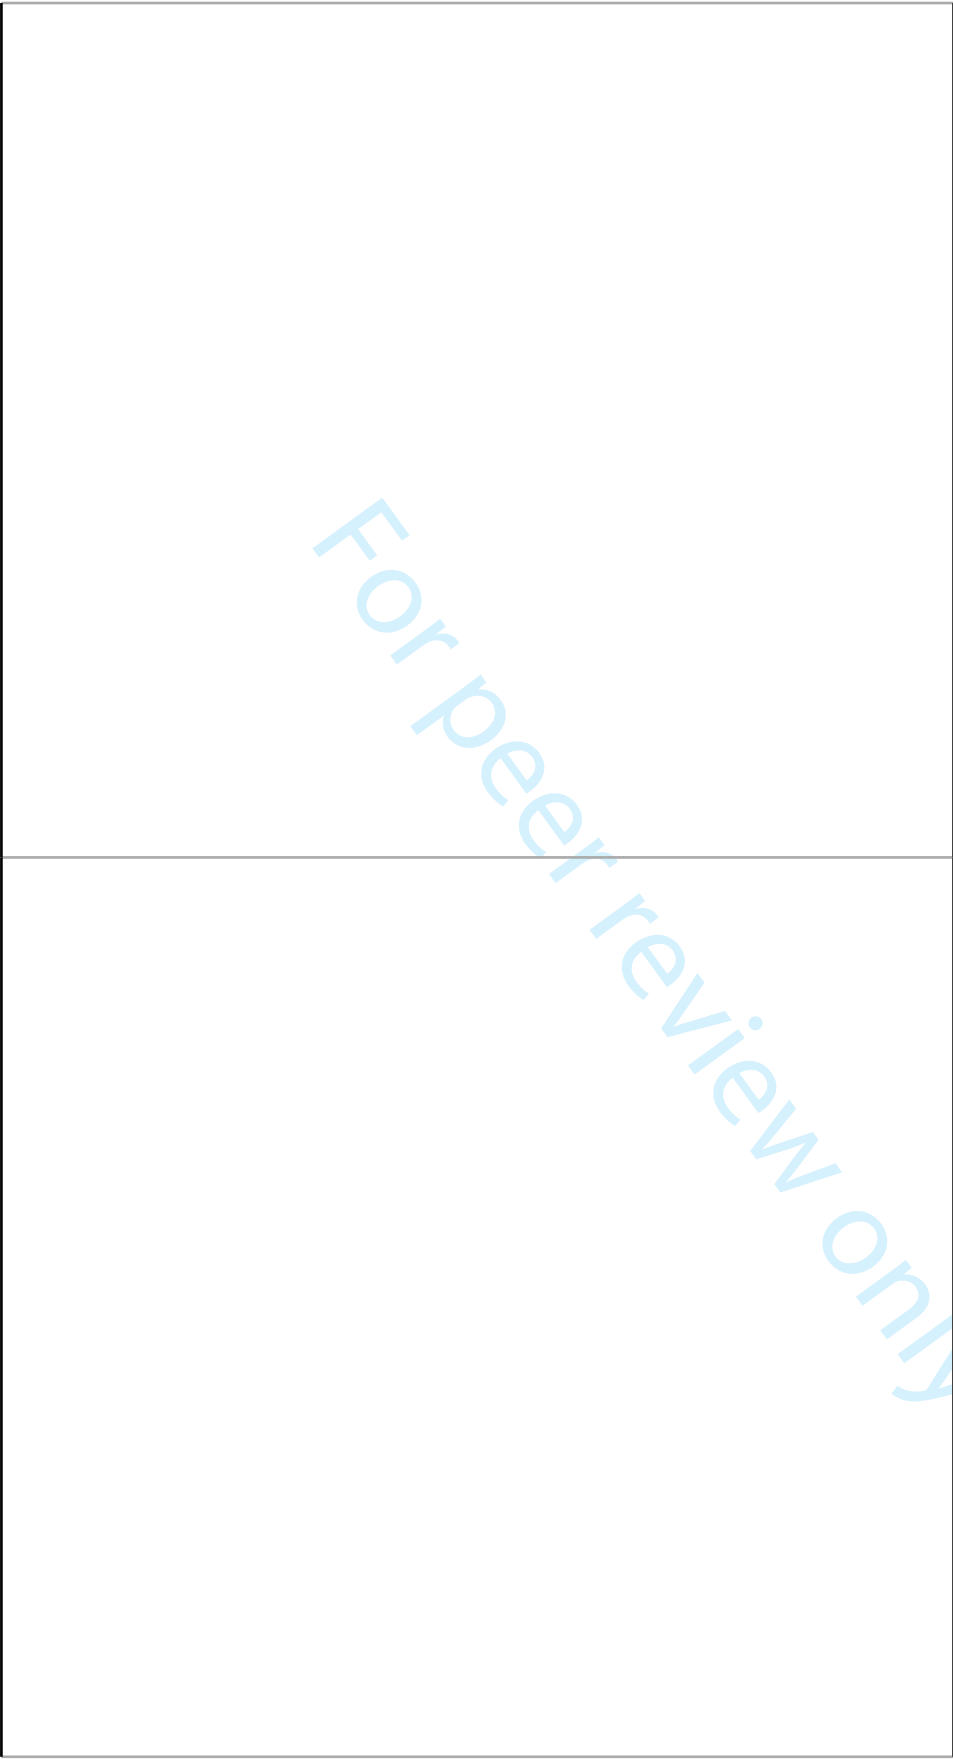

1  
2  
3  
4  
5  
6  
7  
8  
9  
10  
11  
12  
13  
14  
15  
16  
17  
18  
19  
20  
21  
22  
23  
24  
25  
26  
27  
28  
29  
30  
31  
32  
33  
34  
35  
36  
37  
38  
39  
40  
41  
42  
43  
44  
45  
46  
47  
48  
49  
50  
51  
52  
53  
54  
55  
56  
57  
58  
59  
60

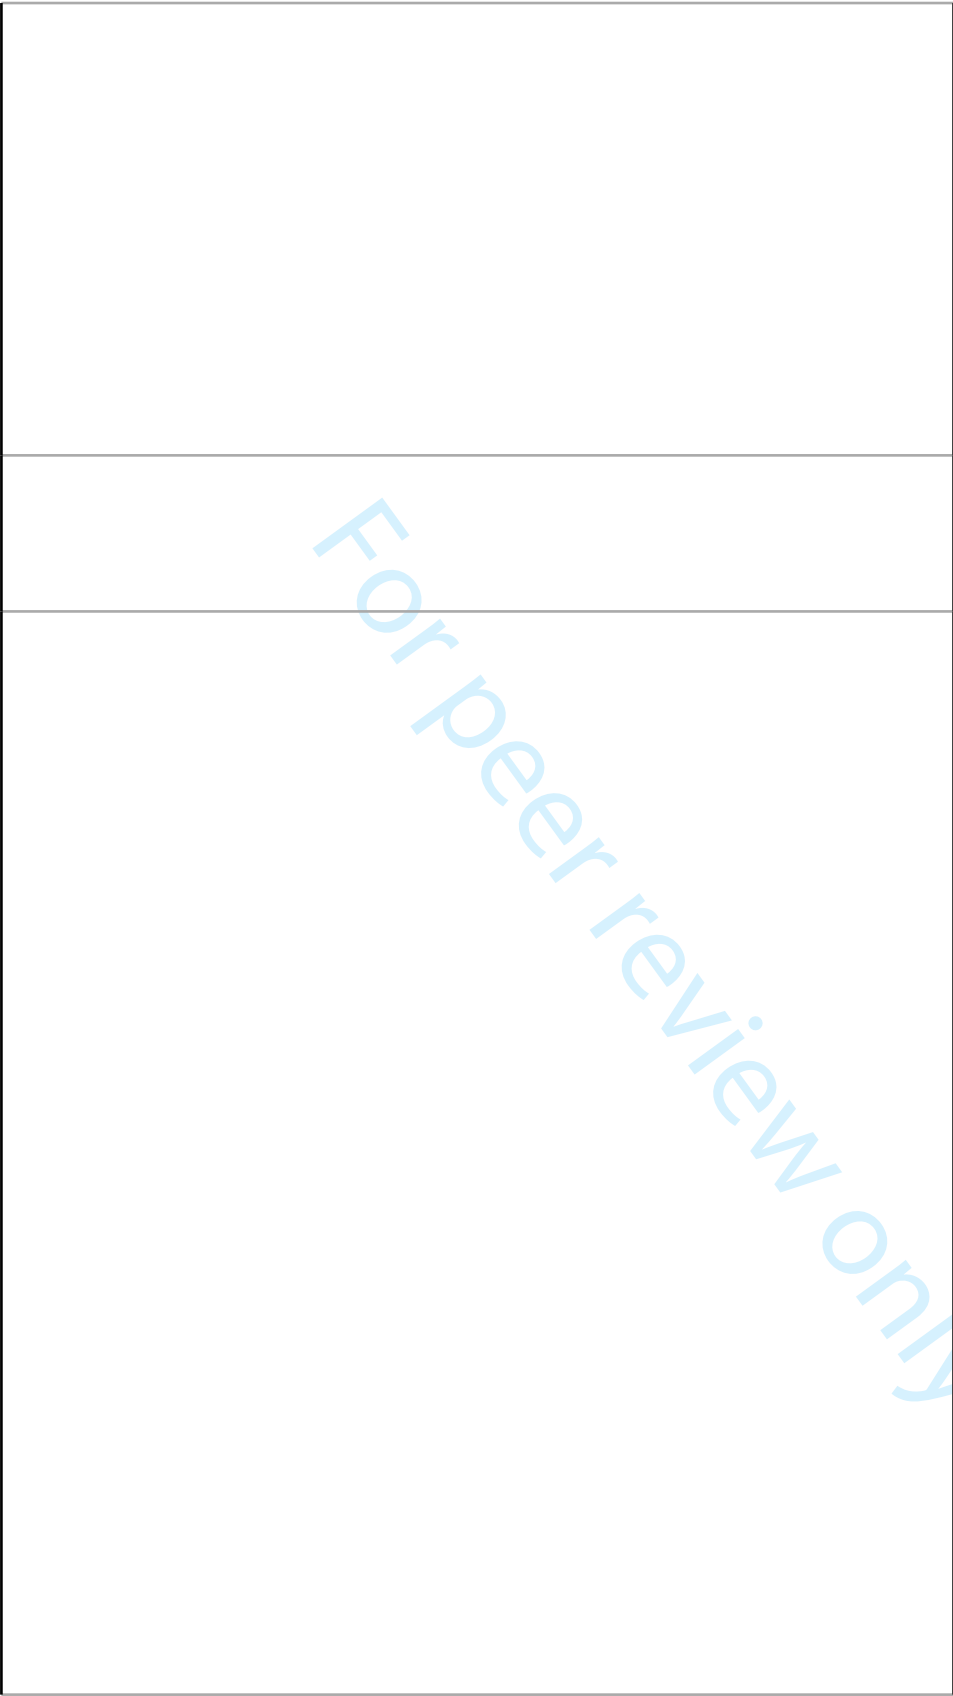

1  
2  
3  
4  
5  
6  
7  
8  
9  
10  
11  
12  
13  
14  
15  
16  
17  
18  
19  
20  
21  
22  
23  
24  
25  
26  
27  
28  
29  
30  
31  
32  
33  
34  
35  
36  
37  
38  
39  
40  
41  
42  
43  
44  
45  
46  
47  
48  
49  
50  
51  
52  
53  
54  
55  
56  
57  
58  
59  
60

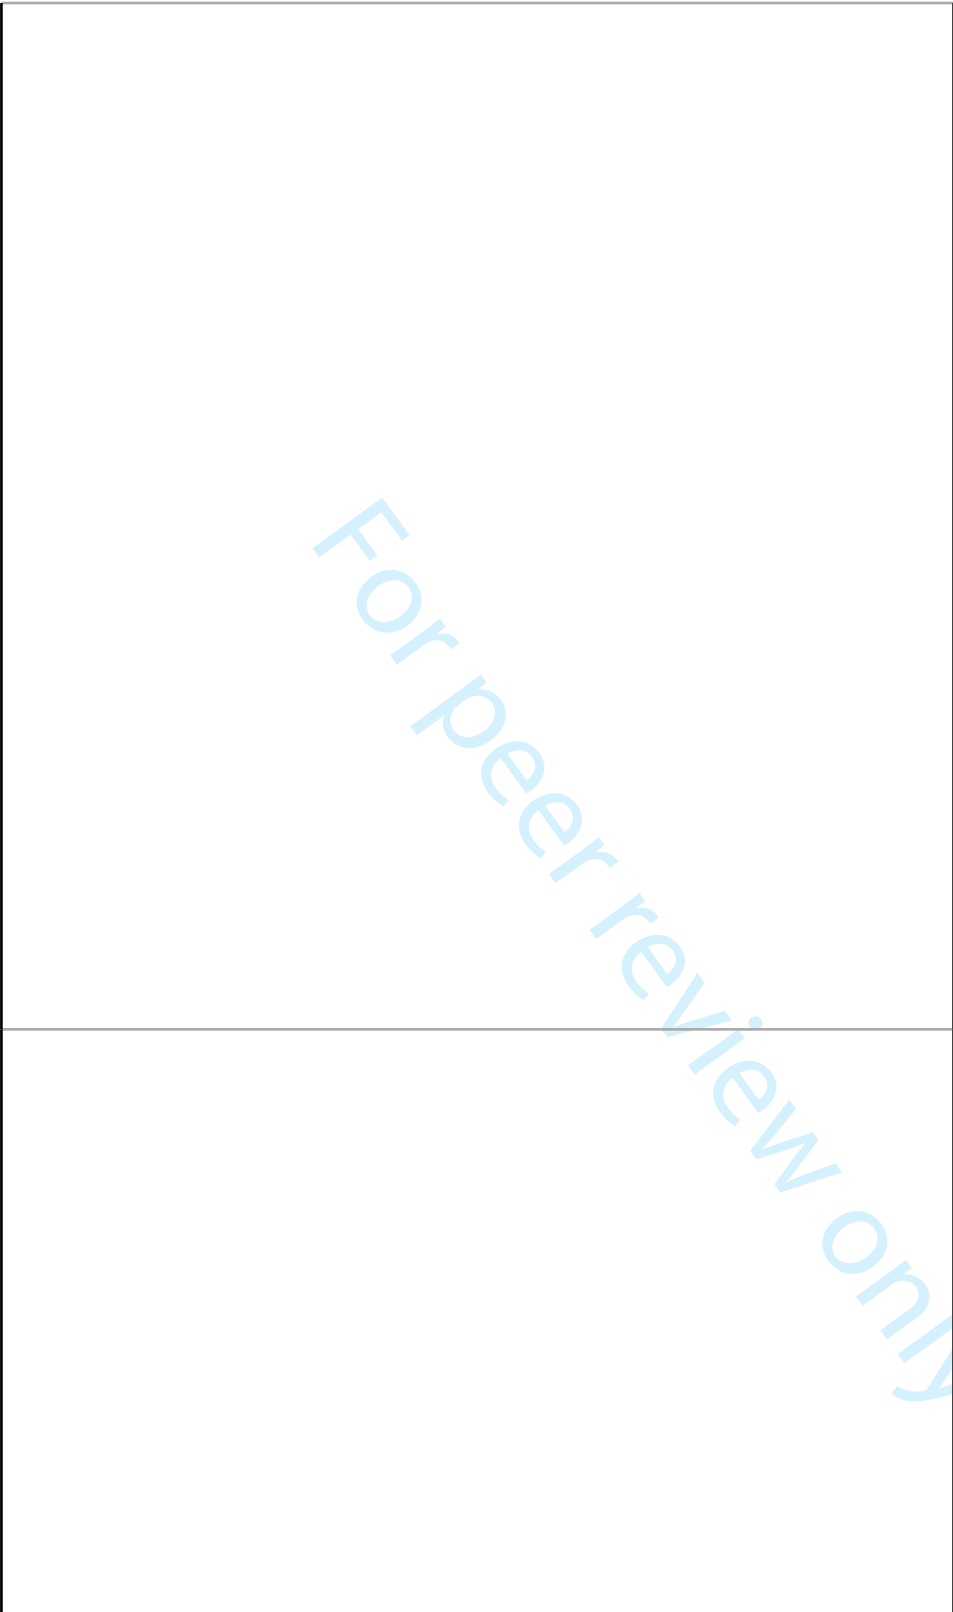

1  
2  
3  
4  
5  
6  
7  
8  
9  
10  
11  
12  
13  
14  
15  
16  
17  
18  
19  
20  
21  
22  
23  
24  
25  
26  
27  
28  
29  
30  
31  
32  
33  
34  
35  
36  
37  
38  
39  
40  
41  
42  
43  
44  
45  
46  
47  
48  
49  
50  
51  
52  
53  
54  
55  
56  
57  
58  
59  
60

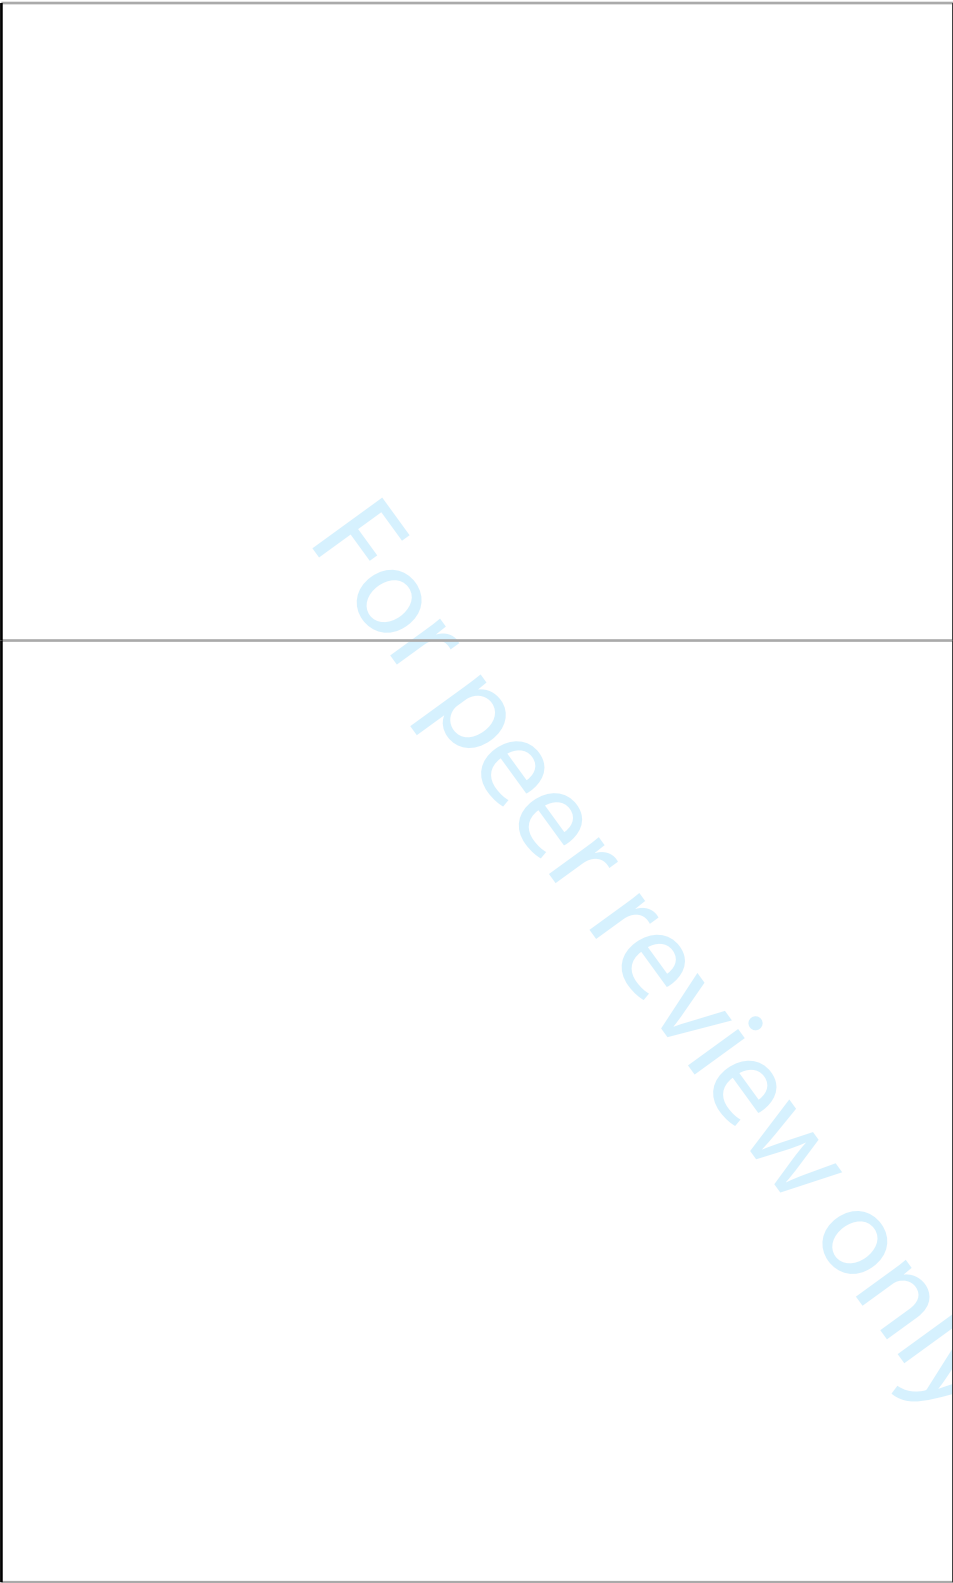

1  
2  
3  
4  
5  
6  
7  
8  
9  
10  
11  
12  
13  
14  
15  
16  
17  
18  
19  
20  
21  
22  
23  
24  
25  
26  
27  
28  
29  
30  
31  
32  
33  
34  
35  
36  
37  
38  
39  
40  
41  
42  
43  
44  
45  
46  
47  
48  
49  
50  
51  
52  
53  
54  
55  
56  
57  
58  
59  
60

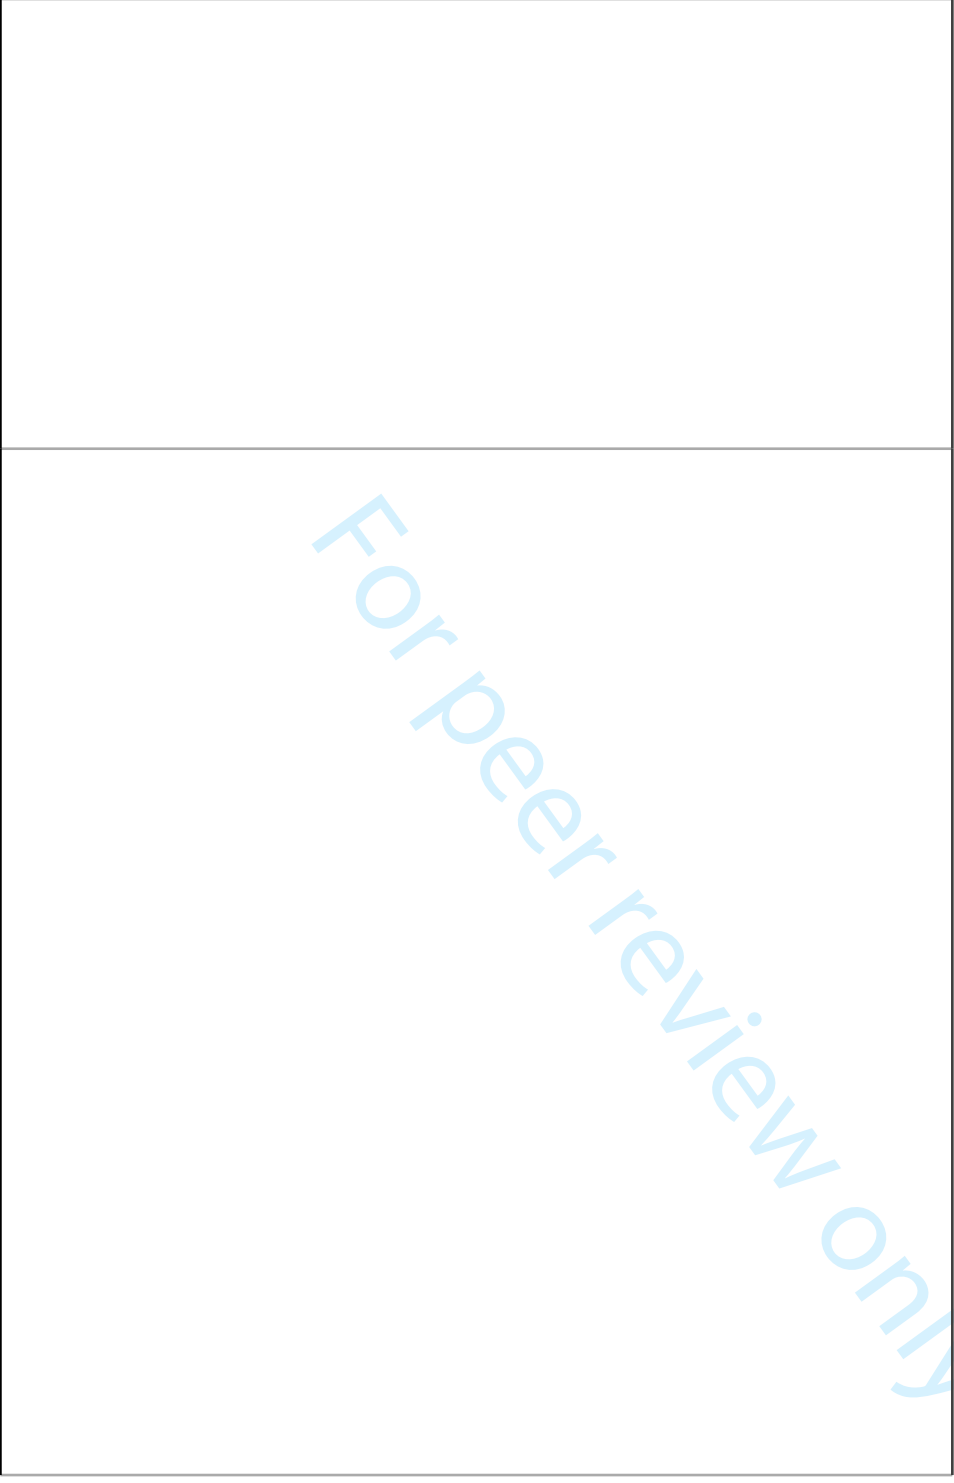

1  
2  
3  
4  
5  
6  
7  
8  
9  
10  
11  
12  
13  
14  
15  
16  
17  
18  
19  
20  
21  
22  
23  
24  
25  
26  
27  
28  
29  
30  
31  
32  
33  
34  
35  
36  
37  
38  
39  
40  
41  
42  
43  
44  
45  
46  
47  
48  
49  
50  
51  
52  
53  
54  
55  
56  
57  
58  
59  
60

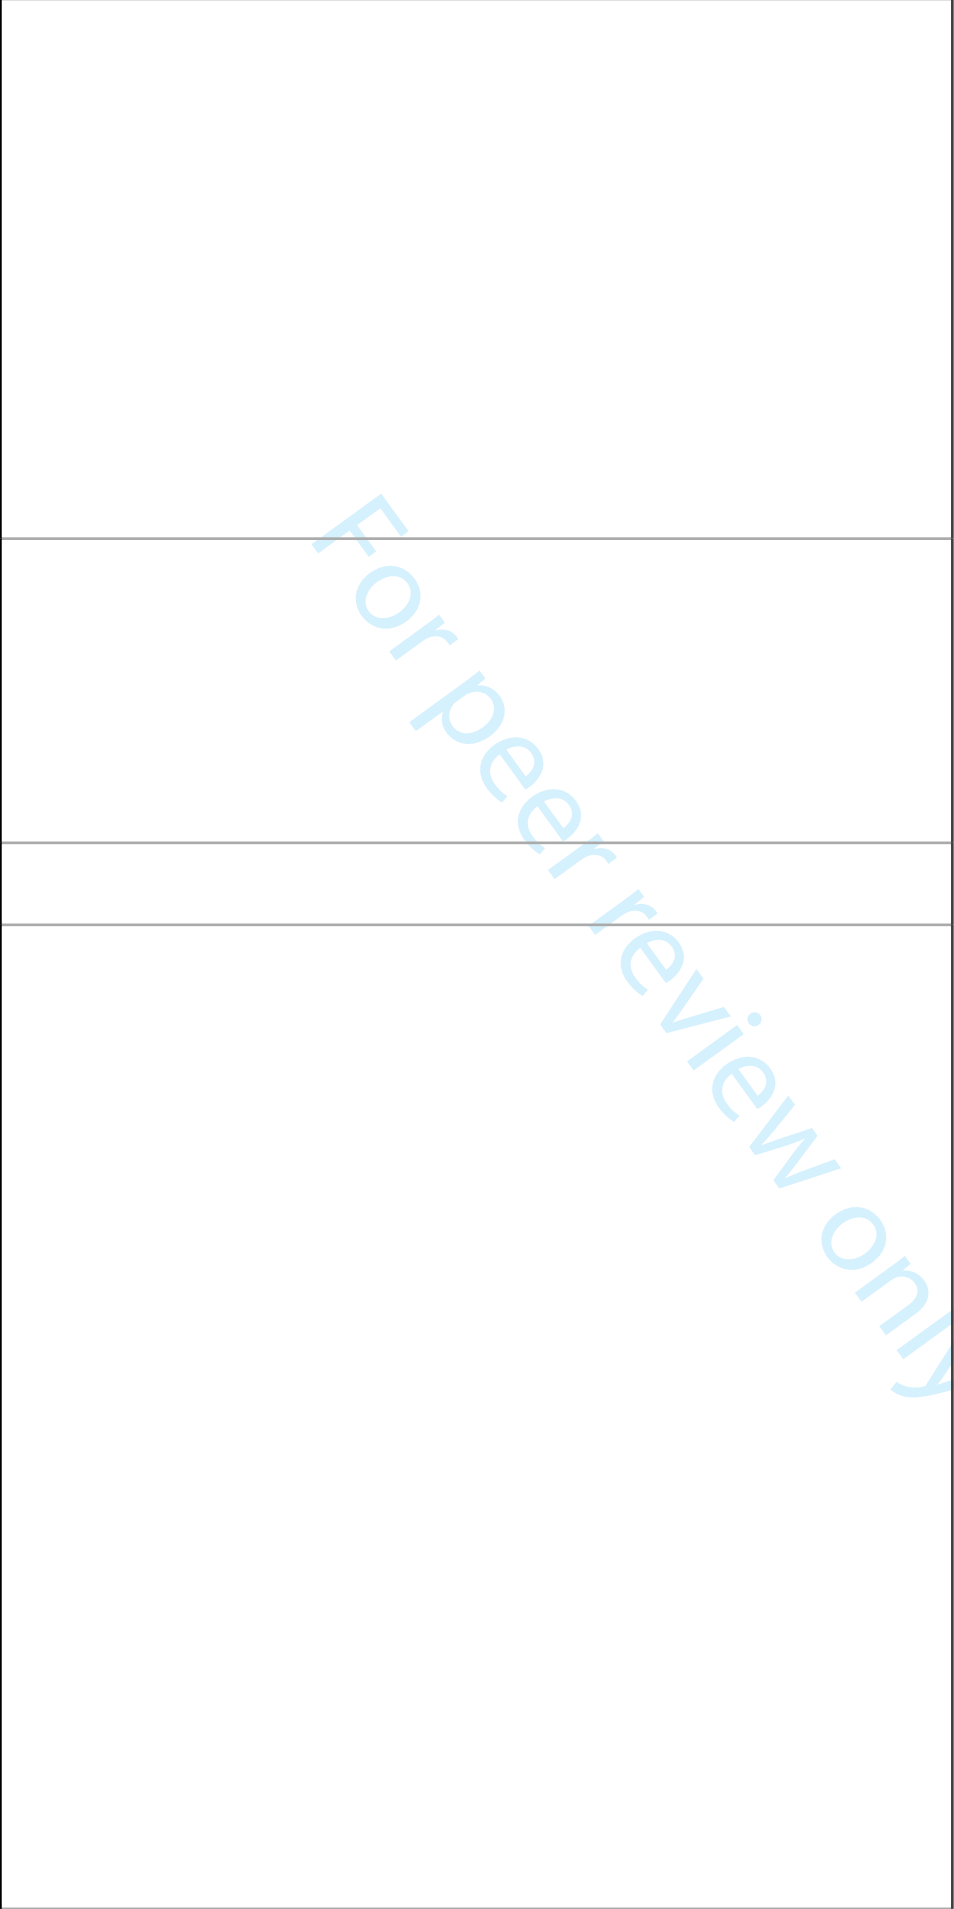

1  
2  
3  
4  
5  
6  
7  
8  
9  
10  
11  
12  
13  
14  
15  
16  
17  
18  
19  
20  
21  
22  
23  
24  
25  
26  
27  
28  
29  
30  
31  
32  
33  
34  
35  
36  
37  
38  
39  
40  
41  
42  
43  
44  
45  
46  
47  
48  
49  
50  
51  
52  
53  
54  
55  
56  
57  
58  
59  
60

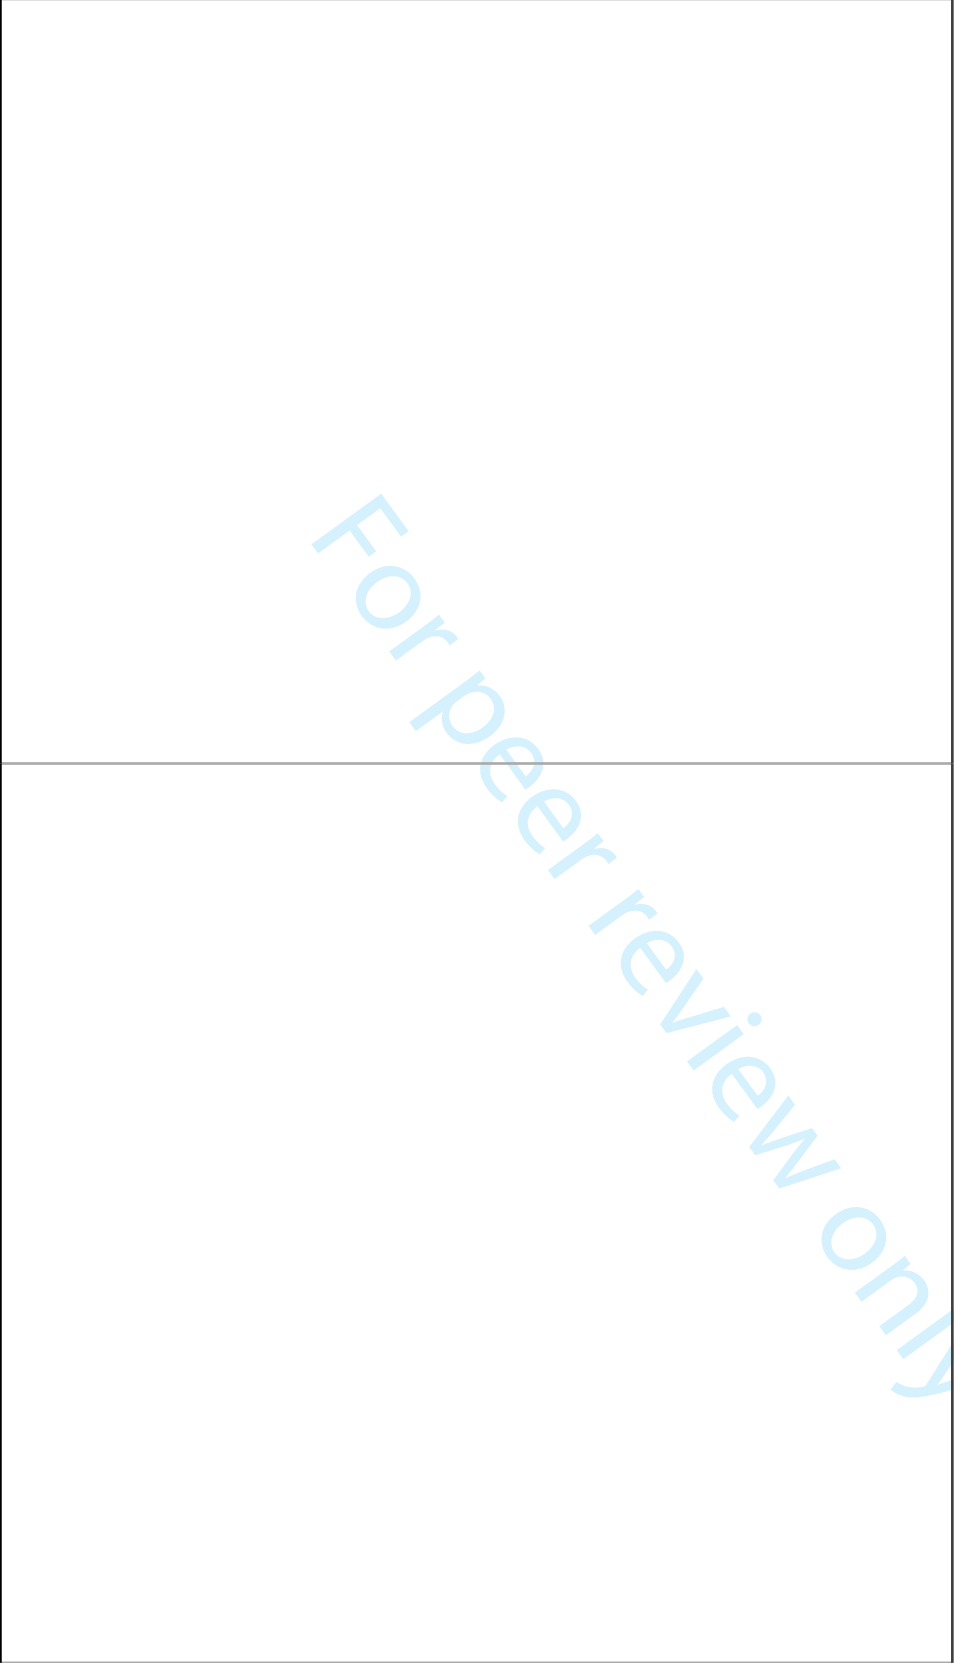

1  
2  
3  
4  
5  
6  
7  
8  
9  
10  
11  
12  
13  
14  
15  
16  
17  
18  
19  
20  
21  
22  
23  
24  
25  
26  
27  
28  
29  
30  
31  
32  
33  
34  
35  
36  
37  
38  
39  
40  
41  
42  
43  
44  
45  
46  
47  
48  
49  
50  
51  
52  
53  
54  
55  
56  
57  
58  
59  
60

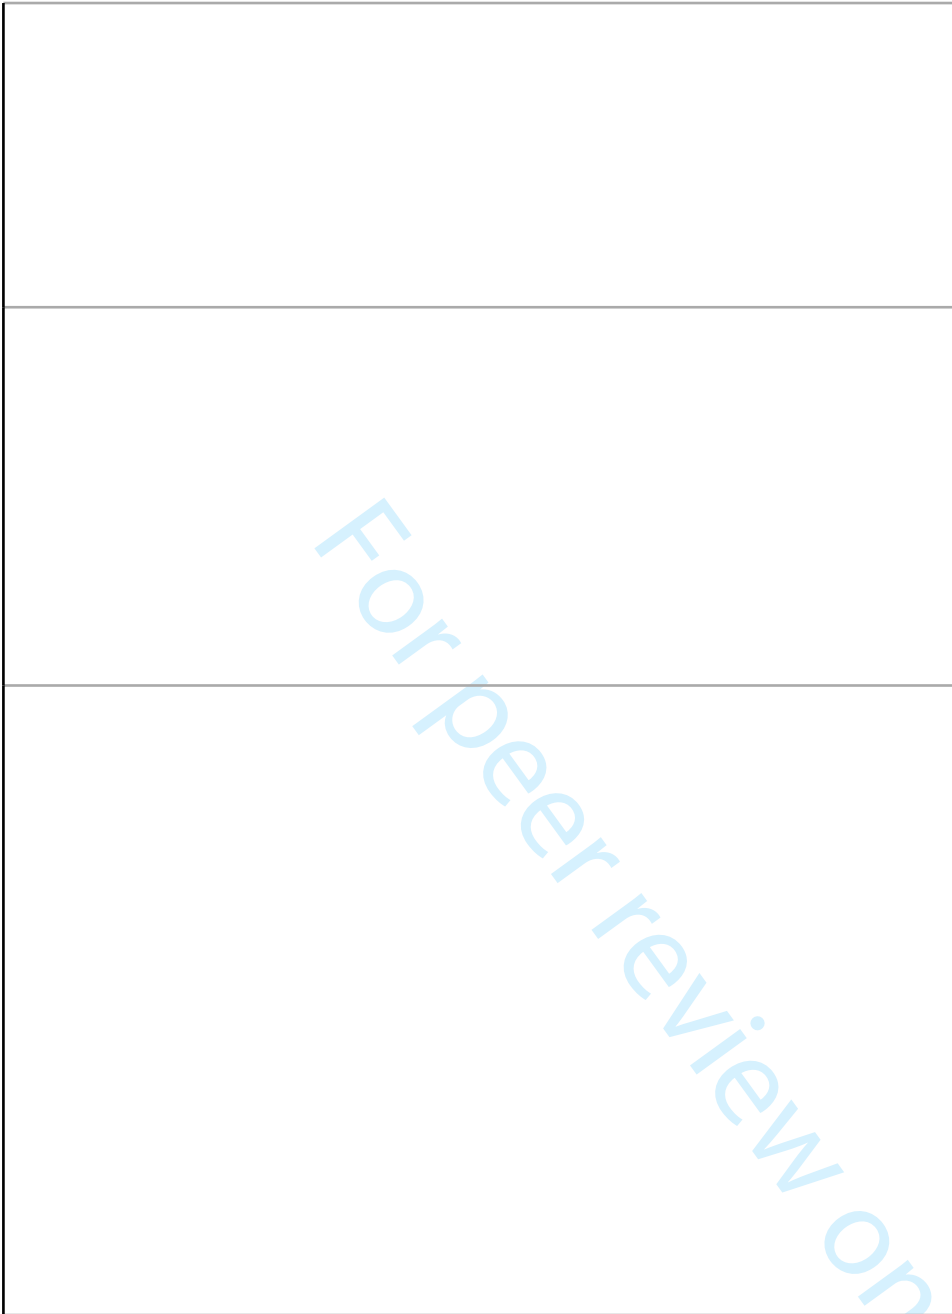







1  
2  
3  
4  
5  
6  
7  
8  
9  
10  
11  
12  
13  
14  
15  
16  
17  
18  
19  
20  
21  
22  
23  
24  
25  
26  
27  
28  
29  
30  
31  
32  
33  
34  
35  
36  
37  
38  
39  
40  
41  
42  
43  
44  
45  
46  
47  
48  
49  
50  
51  
52  
53  
54  
55  
56  
57  
58  
59  
60

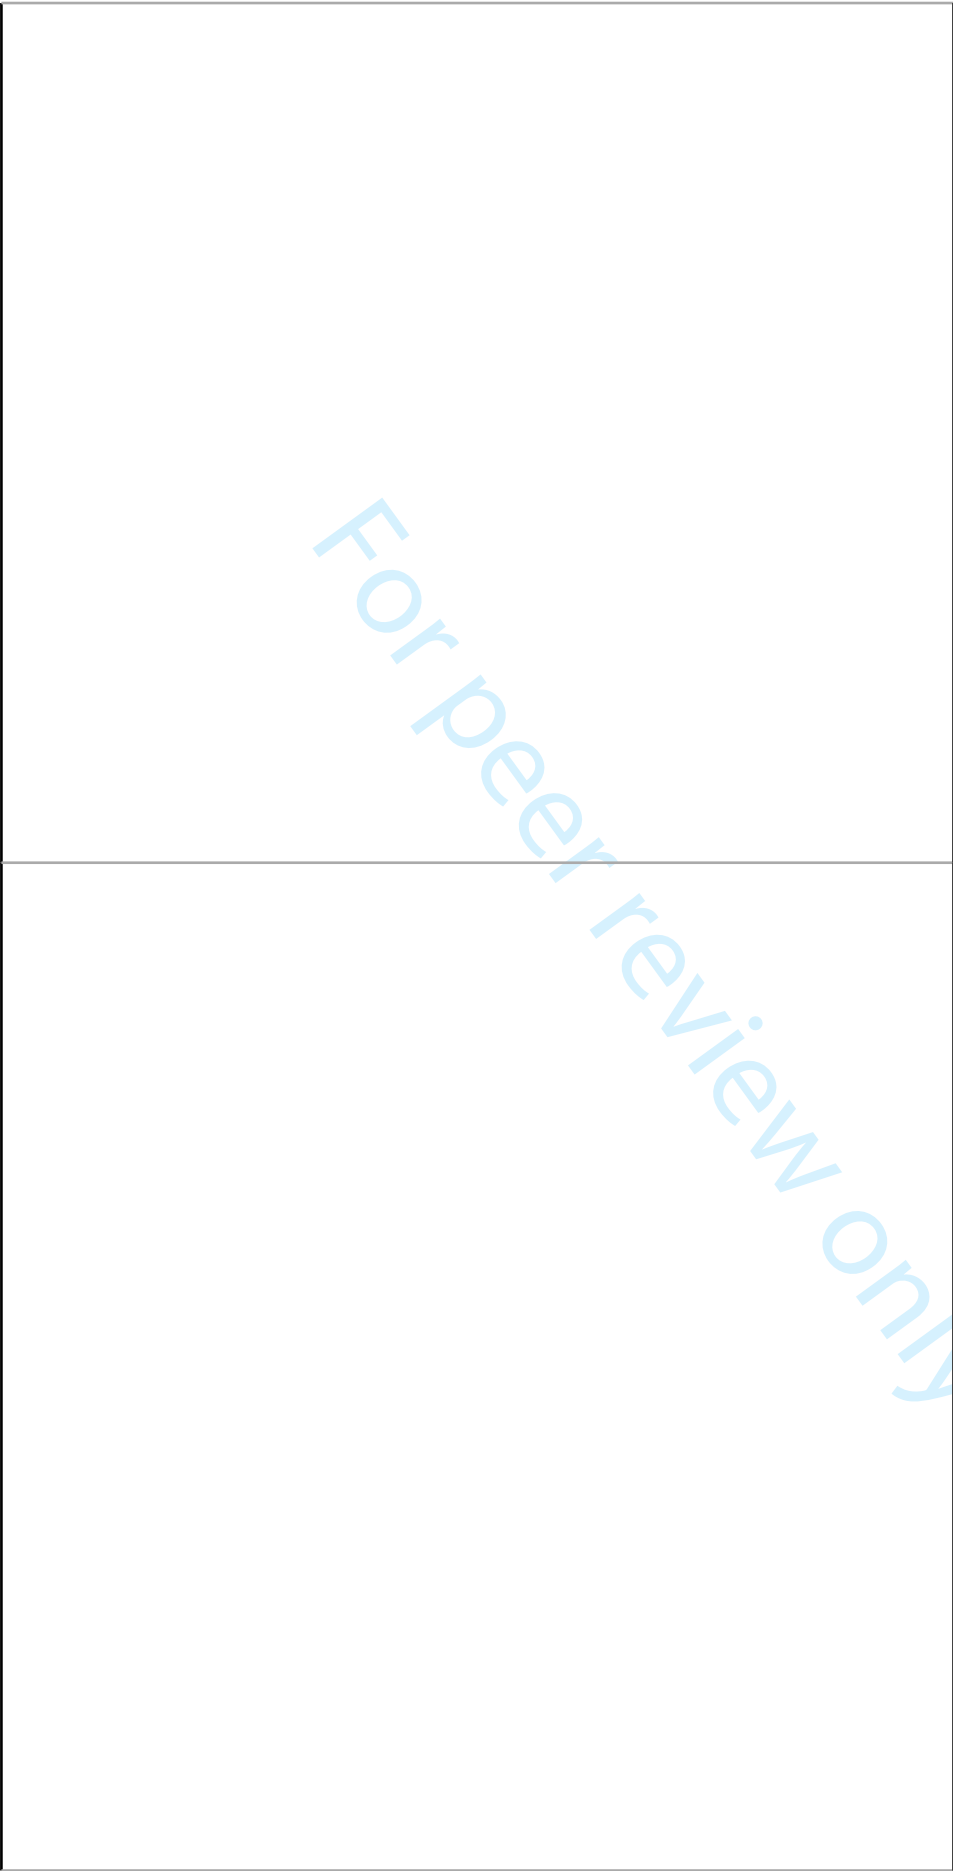





1  
2  
3  
4  
5  
6  
7  
8  
9  
10  
11  
12  
13  
14  
15  
16  
17  
18  
19  
20  
21  
22  
23  
24  
25  
26  
27  
28  
29  
30  
31  
32  
33  
34  
35  
36  
37  
38  
39  
40  
41  
42  
43  
44  
45  
46  
47  
48  
49  
50  
51  
52  
53  
54  
55  
56  
57  
58  
59  
60

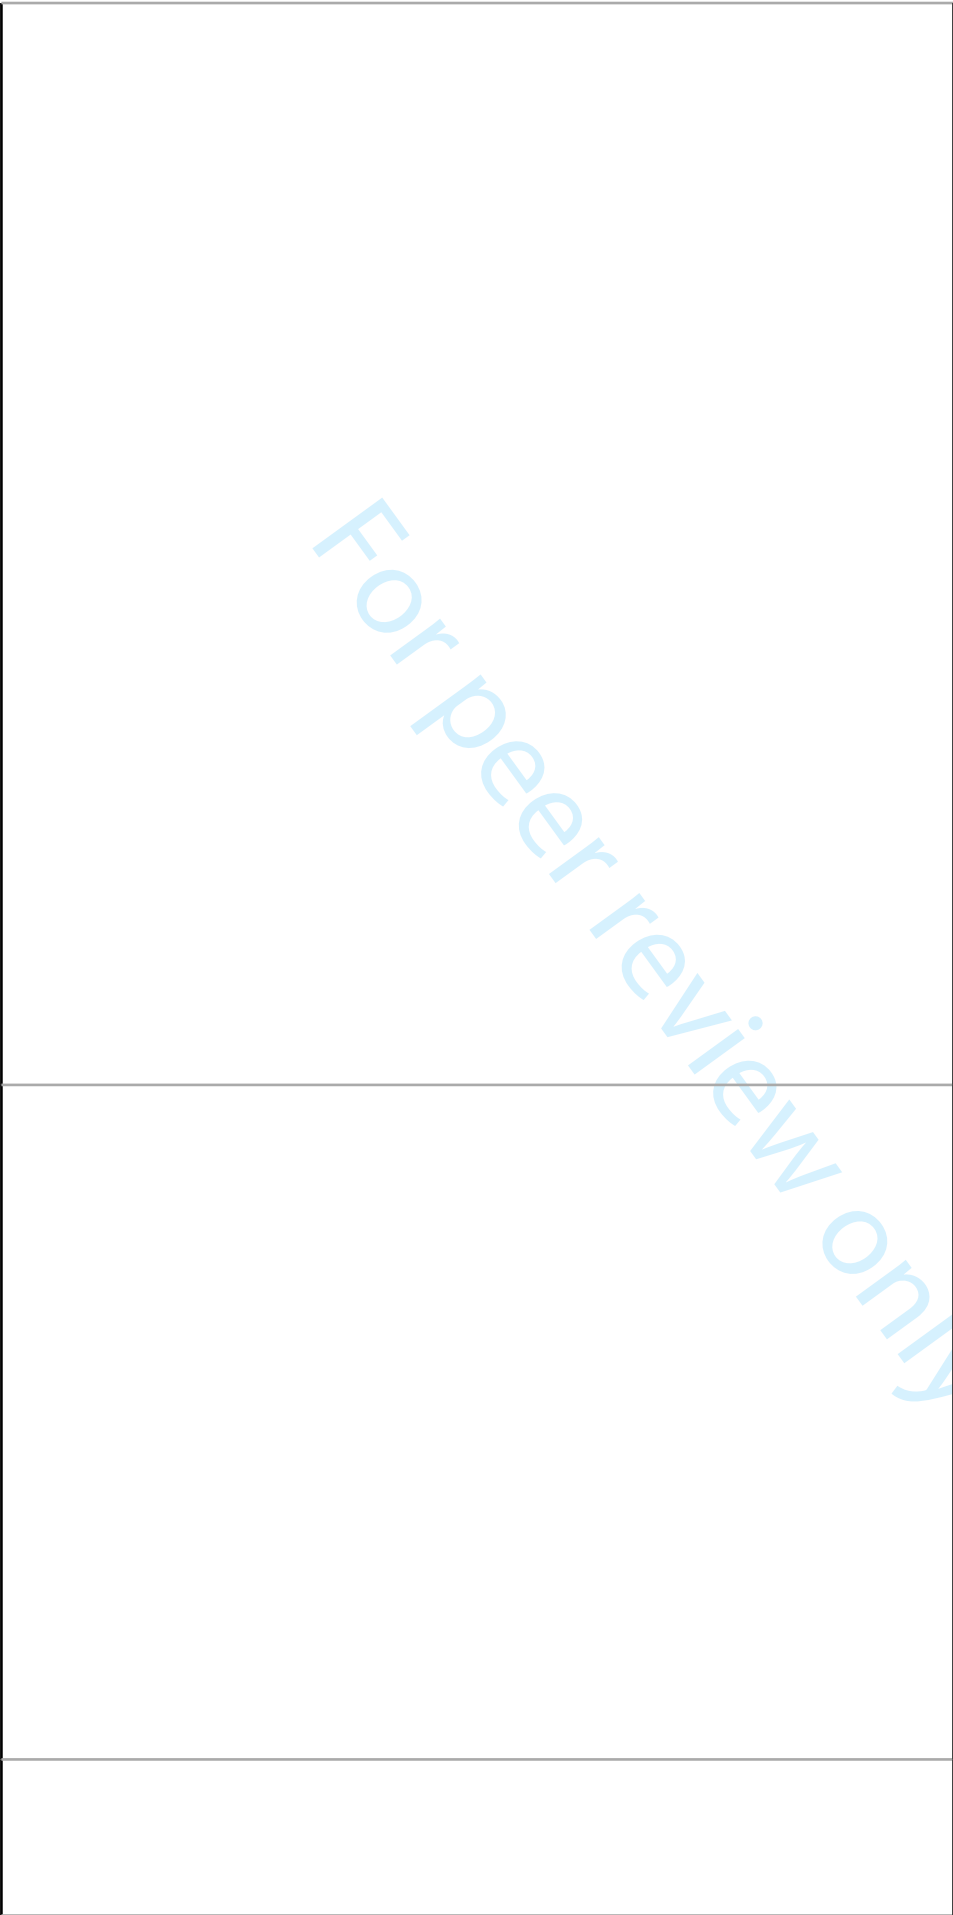



1  
2  
3  
4  
5  
6  
7  
8  
9  
10  
11  
12  
13  
14  
15  
16  
17  
18  
19  
20  
21  
22  
23  
24  
25  
26  
27  
28  
29  
30  
31  
32  
33  
34  
35  
36  
37  
38  
39  
40  
41  
42  
43  
44  
45  
46  
47  
48  
49  
50  
51  
52  
53  
54  
55  
56  
57  
58  
59  
60

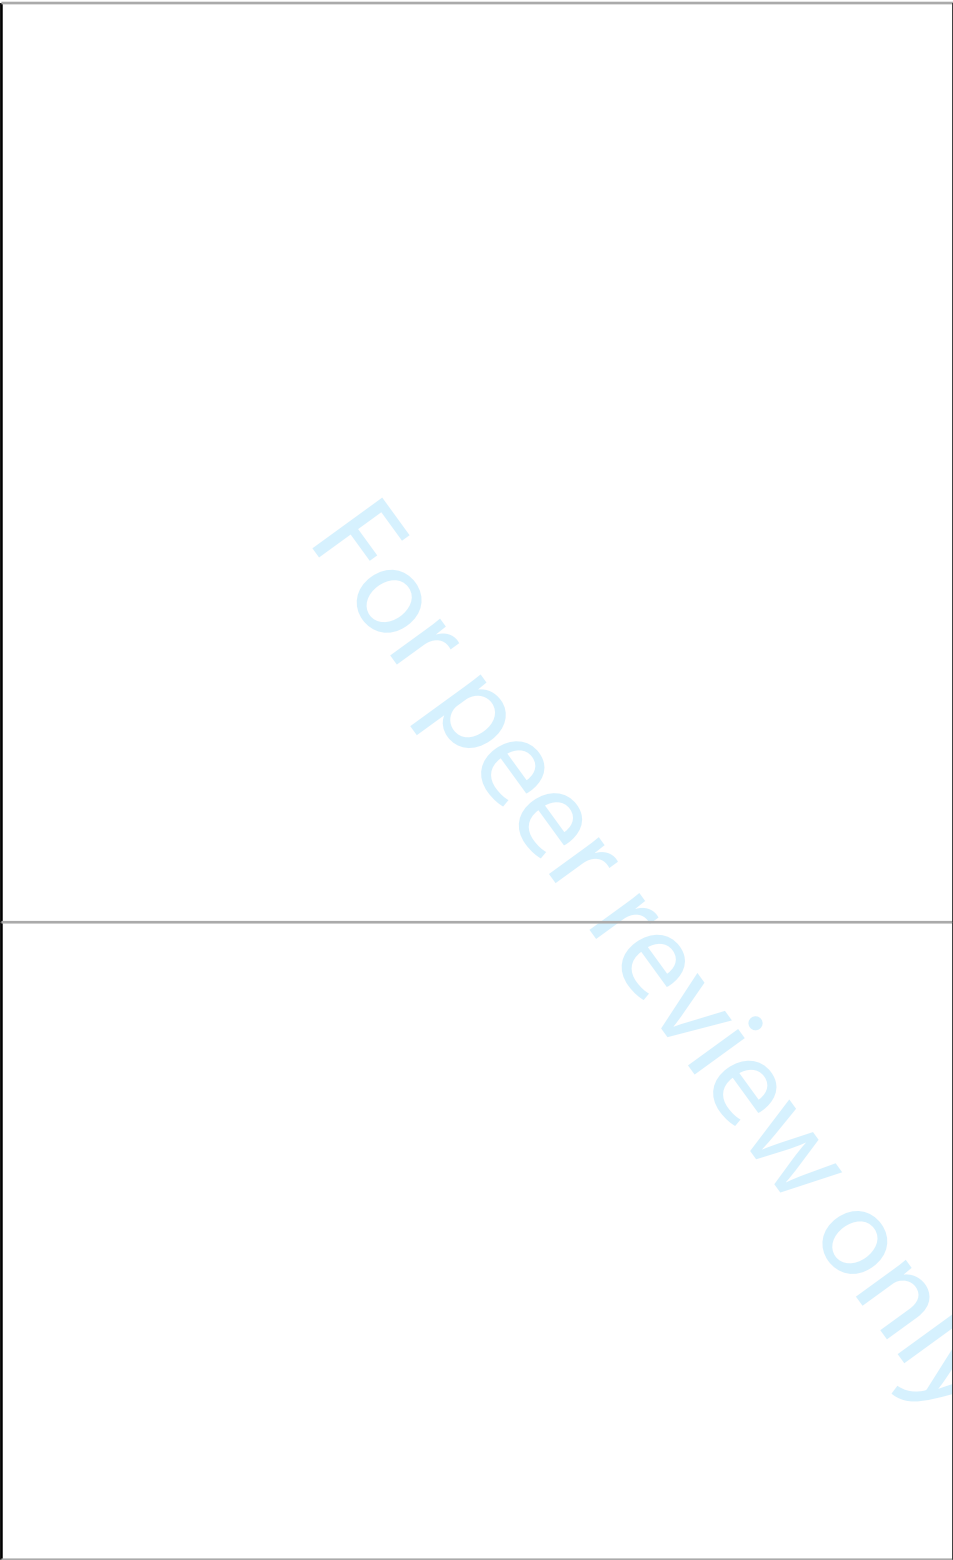



1  
2  
3  
4  
5  
6  
7  
8  
9  
10  
11  
12  
13  
14  
15  
16  
17  
18  
19  
20  
21  
22  
23  
24  
25  
26  
27  
28  
29  
30  
31  
32  
33  
34  
35  
36  
37  
38  
39  
40  
41  
42  
43  
44  
45  
46  
47  
48  
49  
50  
51  
52  
53  
54  
55  
56  
57  
58  
59  
60

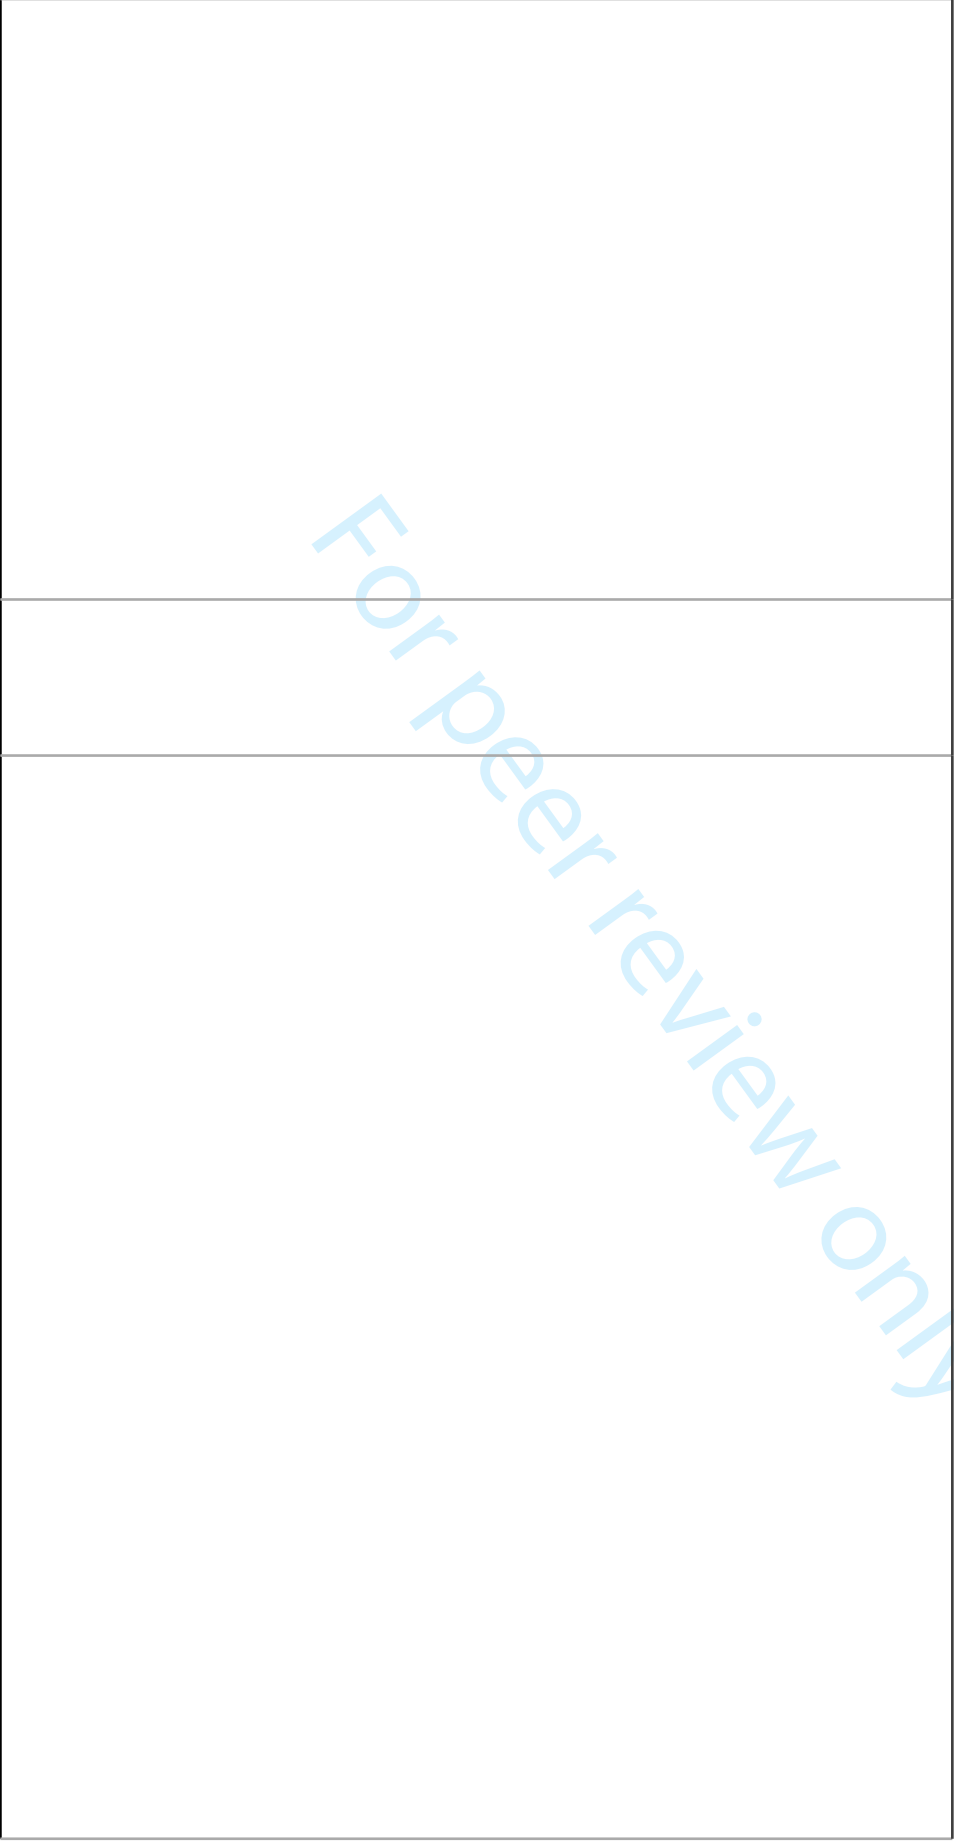

For peer review only

1  
2  
3  
4  
5  
6  
7  
8  
9  
10  
11  
12  
13  
14  
15  
16  
17  
18  
19  
20  
21  
22  
23  
24  
25  
26  
27  
28  
29  
30  
31  
32  
33  
34  
35  
36  
37  
38  
39  
40  
41  
42  
43  
44  
45  
46  
47  
48  
49  
50  
51  
52  
53  
54  
55  
56  
57  
58  
59  
60

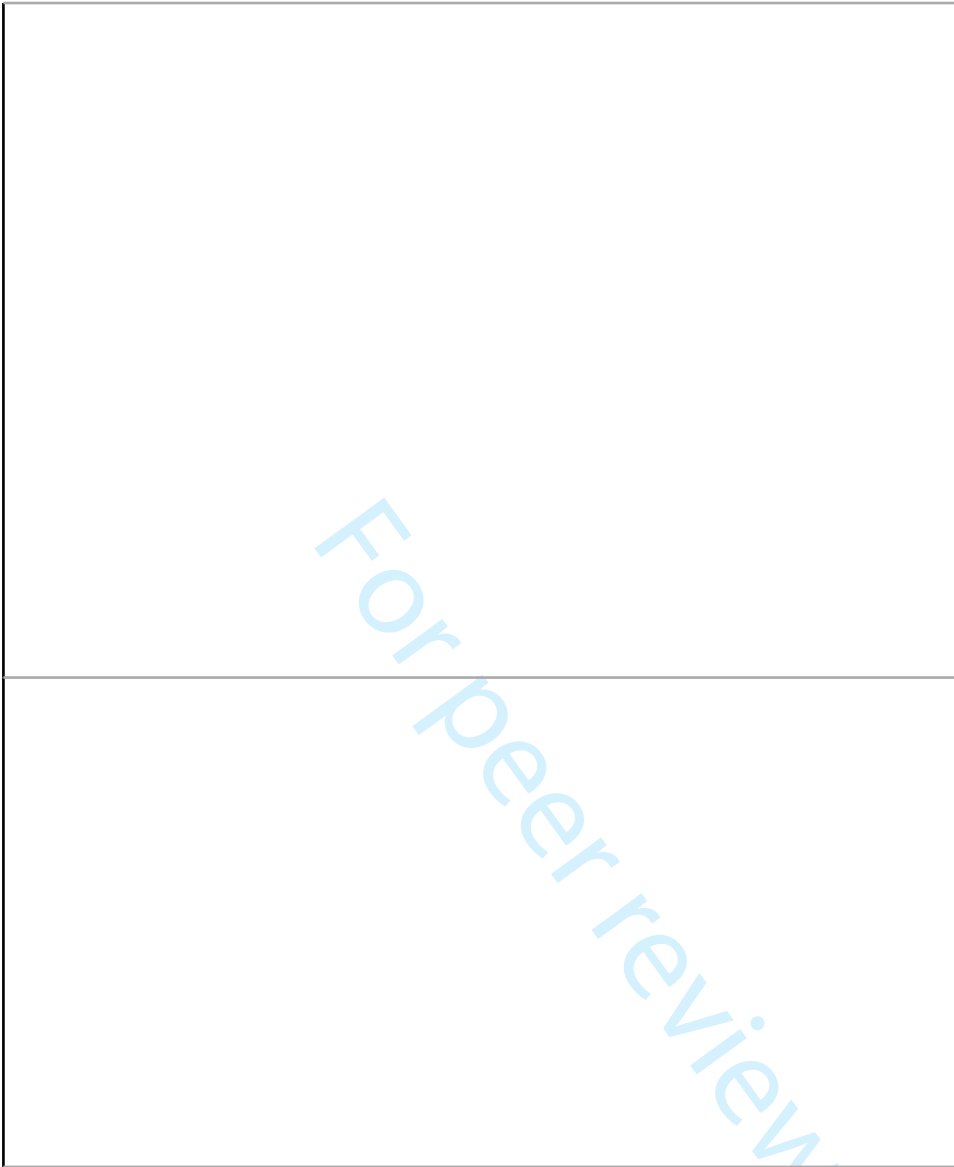

For peer review only

1  
2  
3  
4  
5  
6  
7  
8  
9  
10  
11  
12  
13  
14  
15  
16  
17  
18  
19  
20  
21  
22  
23  
24  
25  
26  
27  
28  
29  
30  
31  
32  
33  
34  
35  
36  
37  
38  
39  
40  
41  
42  
43  
44  
45  
46  
47  
48  
49  
50  
51  
52  
53  
54  
55  
56  
57  
58  
59  
60

|  |
|--|
|  |
|  |
|  |

For peer review only

1  
2  
3  
4  
5  
6  
7  
8  
9  
10  
11  
12  
13  
14  
15  
16  
17  
18  
19  
20  
21  
22  
23  
24  
25  
26  
27  
28  
29  
30  
31  
32  
33  
34  
35  
36  
37  
38  
39  
40  
41  
42  
43  
44  
45  
46  
47  
48  
49  
50  
51  
52  
53  
54  
55  
56  
57  
58  
59  
60

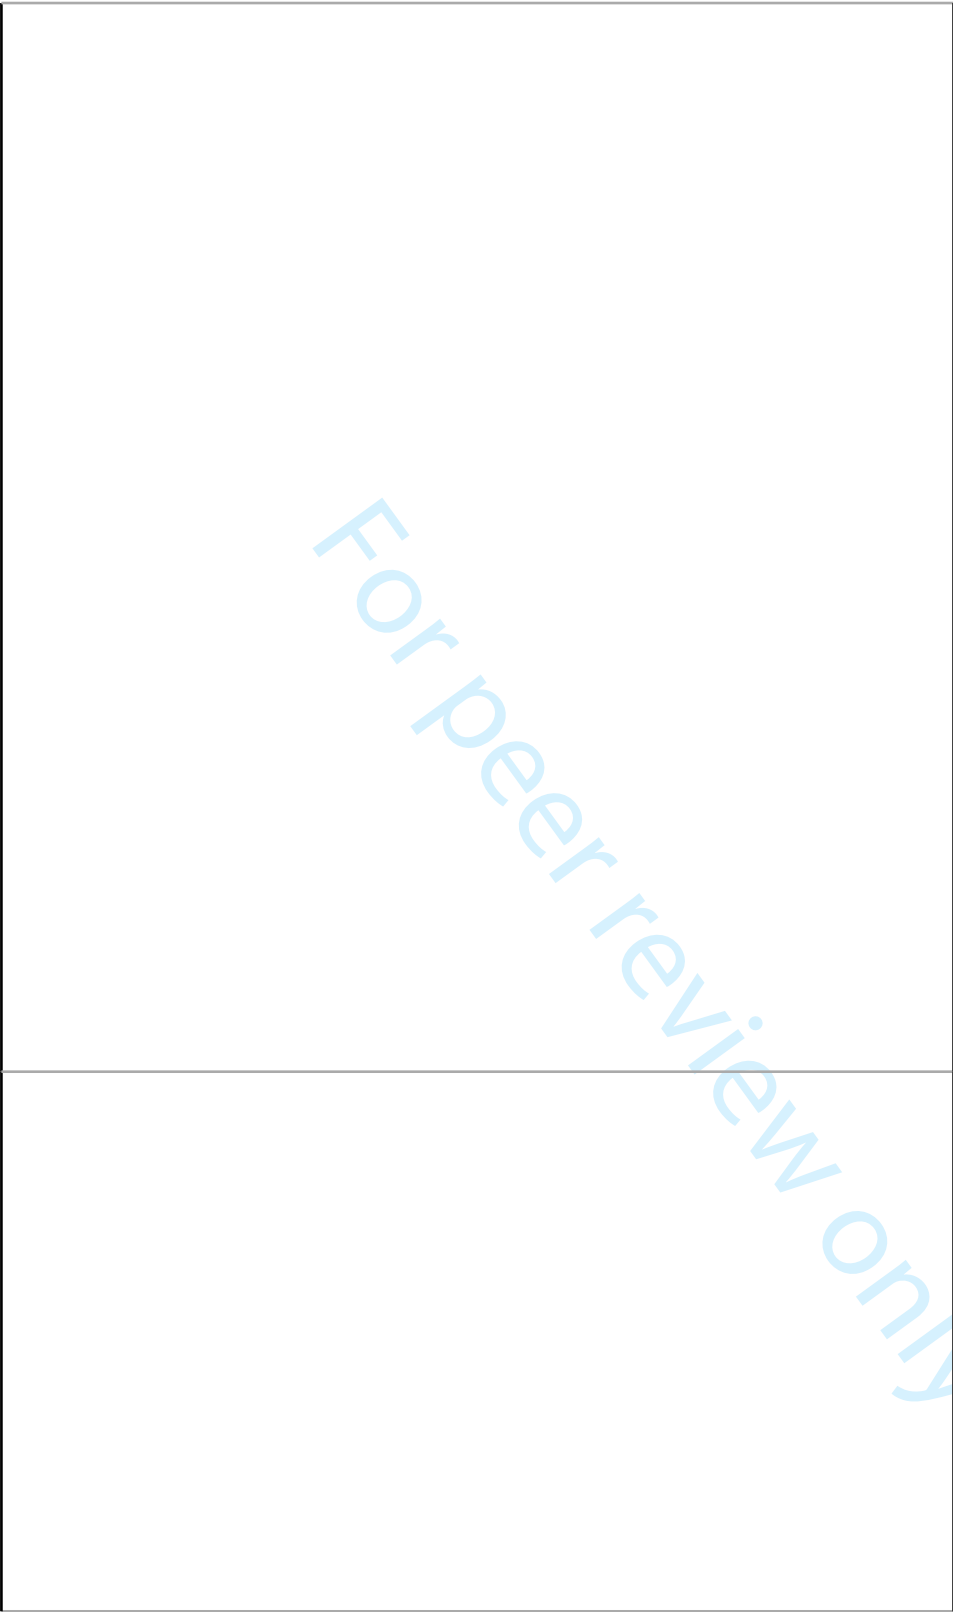

1  
2  
3  
4  
5  
6  
7  
8  
9  
10  
11  
12  
13  
14  
15  
16  
17  
18  
19  
20  
21  
22  
23  
24  
25  
26  
27  
28  
29  
30  
31  
32  
33  
34  
35  
36  
37  
38  
39  
40  
41  
42  
43  
44  
45  
46  
47  
48  
49  
50  
51  
52  
53  
54  
55  
56  
57  
58  
59  
60

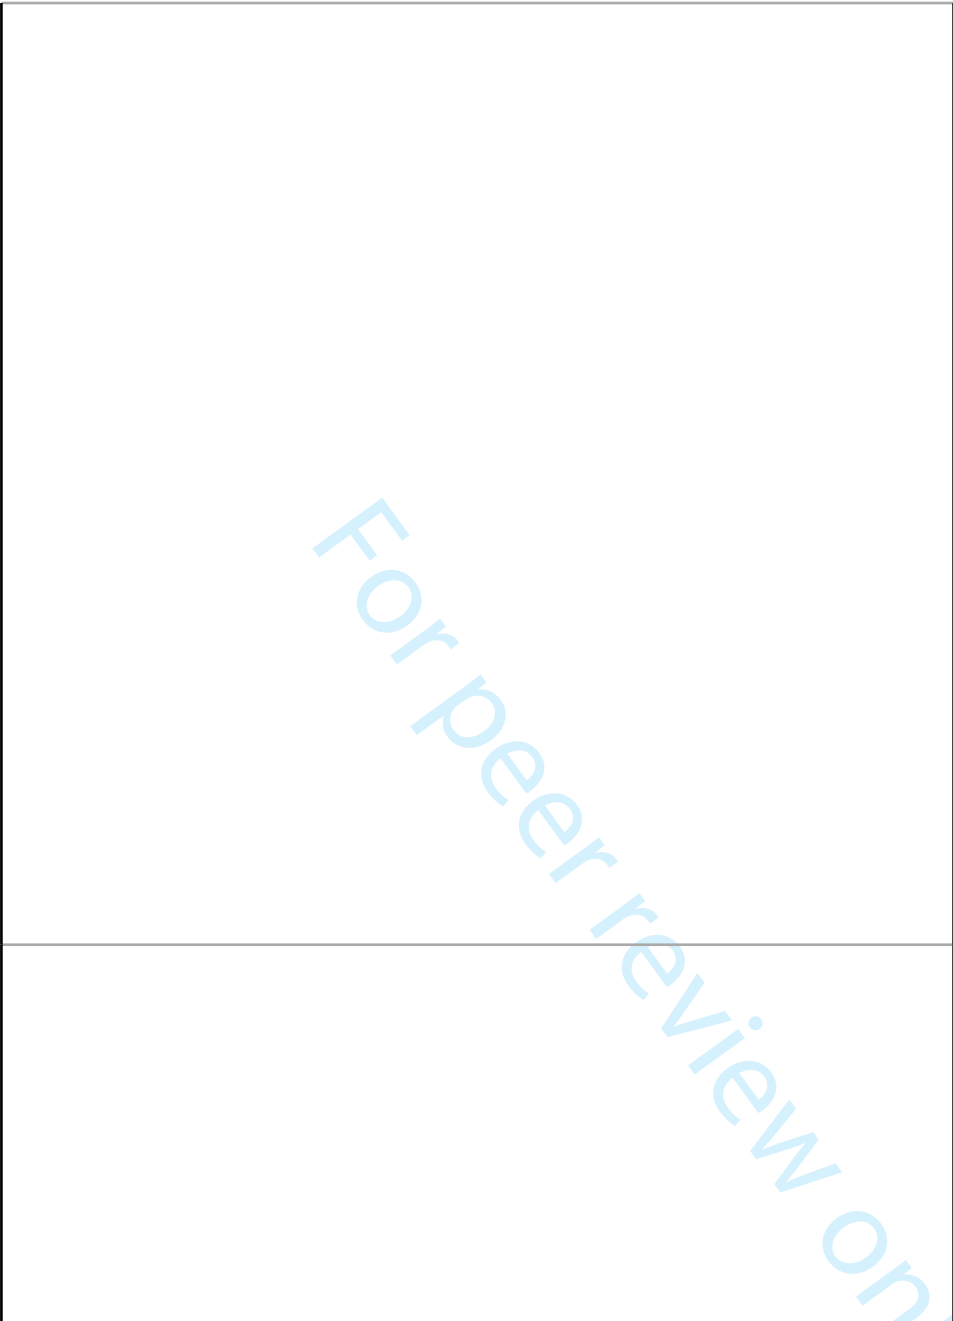

For peer review only

1  
2  
3  
4  
5  
6  
7  
8  
9  
10  
11  
12  
13  
14  
15  
16  
17  
18  
19  
20  
21  
22  
23  
24  
25  
26  
27  
28  
29  
30  
31  
32  
33  
34  
35  
36  
37  
38  
39  
40  
41  
42  
43  
44  
45  
46  
47  
48  
49  
50  
51  
52  
53  
54  
55  
56  
57  
58  
59  
60

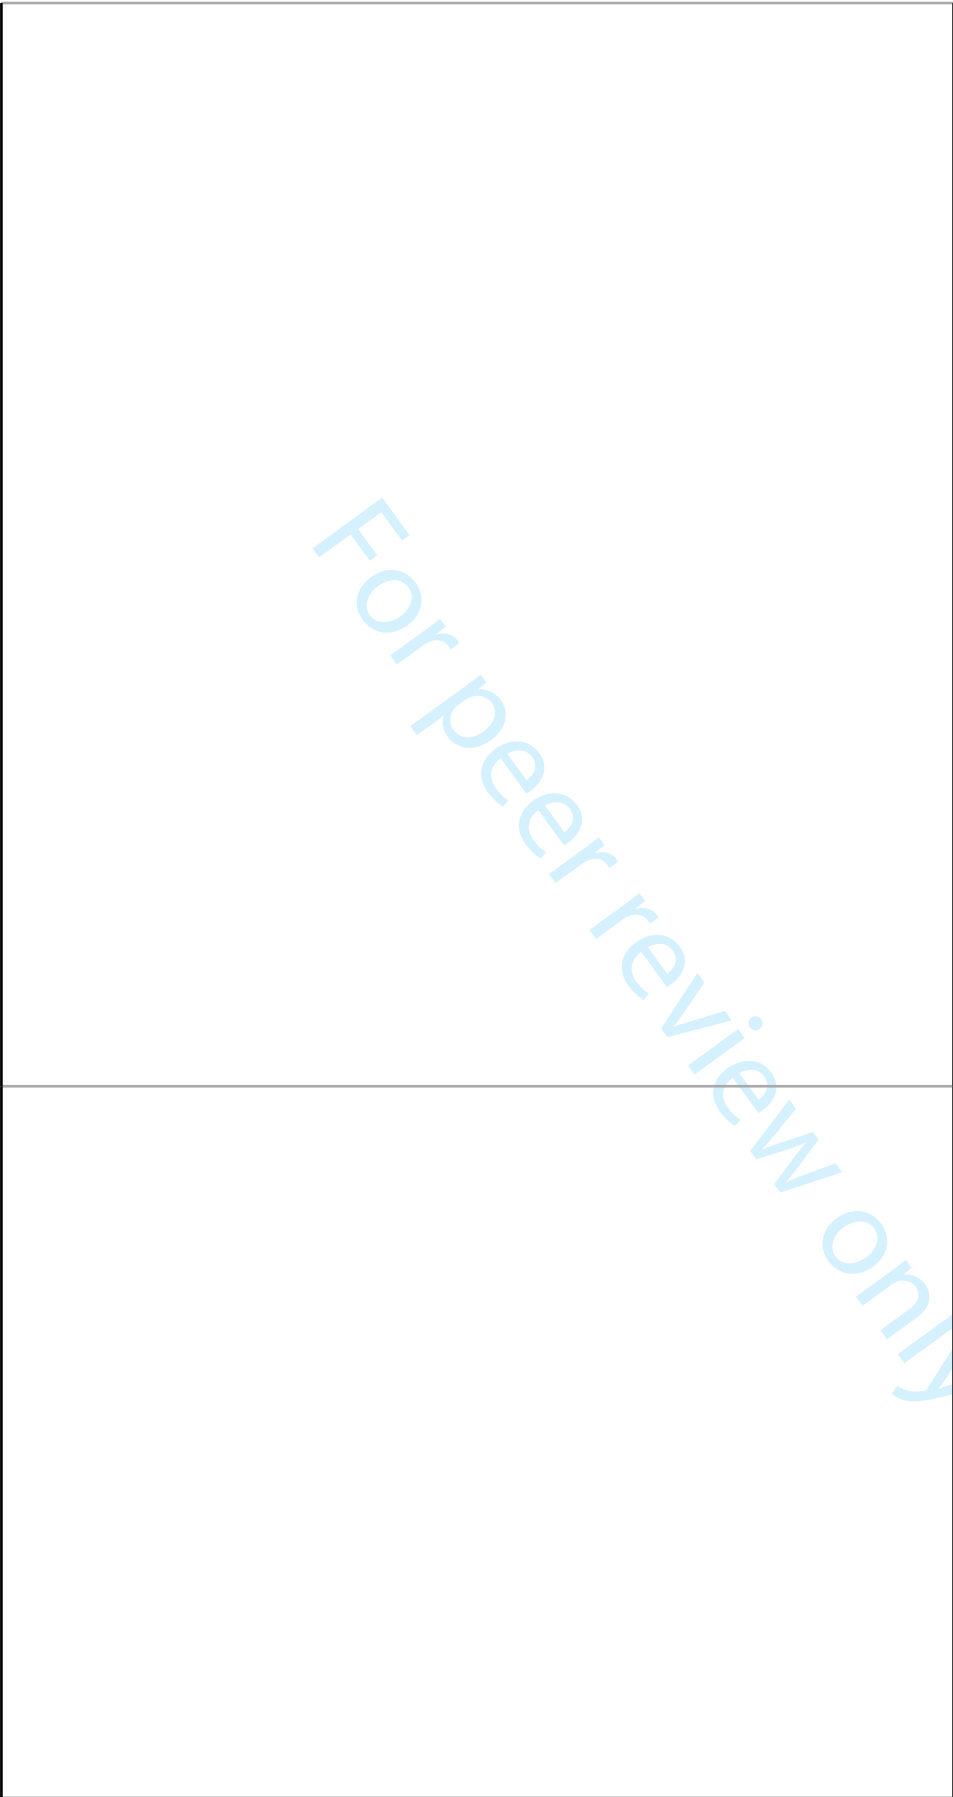

1  
2  
3  
4  
5  
6  
7  
8  
9  
10  
11  
12  
13  
14  
15  
16  
17  
18  
19  
20  
21  
22  
23  
24  
25  
26  
27  
28  
29  
30  
31  
32  
33  
34  
35  
36  
37  
38  
39  
40  
41  
42  
43  
44  
45  
46  
47  
48  
49  
50  
51  
52  
53  
54  
55  
56  
57  
58  
59  
60

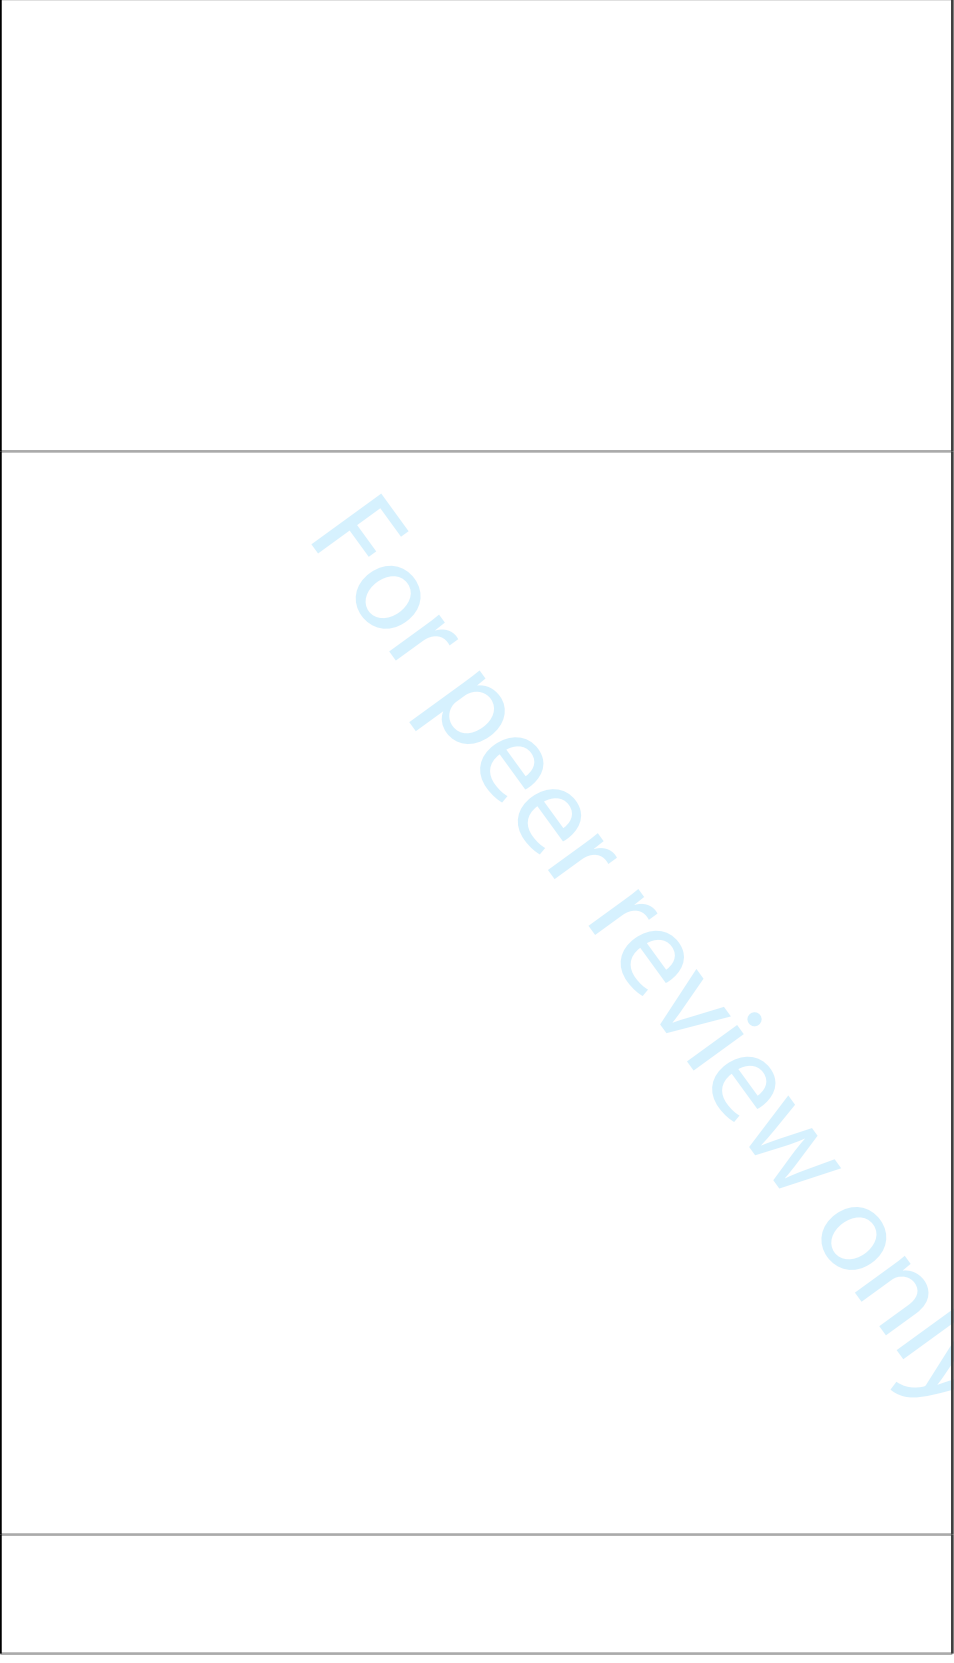





1  
2  
3  
4  
5  
6  
7  
8  
9  
10  
11  
12  
13  
14  
15  
16  
17  
18  
19  
20  
21  
22  
23  
24  
25  
26  
27  
28  
29  
30  
31  
32  
33  
34  
35  
36  
37  
38  
39  
40  
41  
42  
43  
44  
45  
46  
47  
48  
49  
50  
51  
52  
53  
54  
55  
56  
57  
58  
59  
60

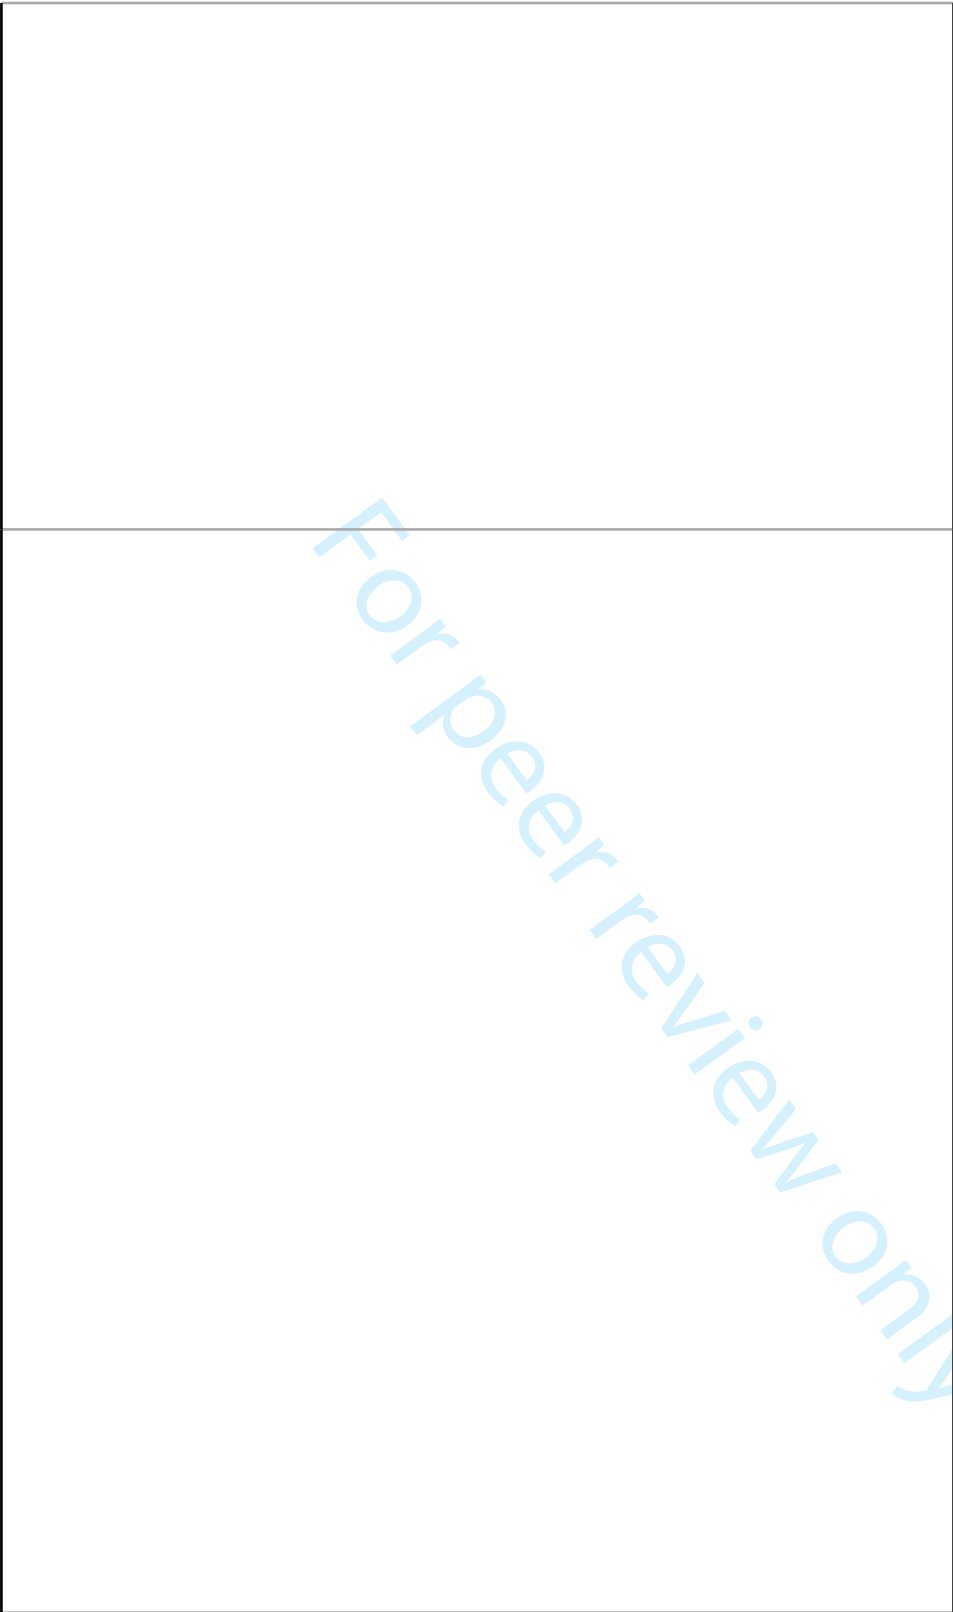

1  
2  
3  
4  
5  
6  
7  
8  
9  
10  
11  
12  
13  
14  
15  
16  
17  
18  
19  
20  
21  
22  
23  
24  
25  
26  
27  
28  
29  
30  
31  
32  
33  
34  
35  
36  
37  
38  
39  
40  
41  
42  
43  
44  
45  
46  
47  
48  
49  
50  
51  
52  
53  
54  
55  
56  
57  
58  
59  
60

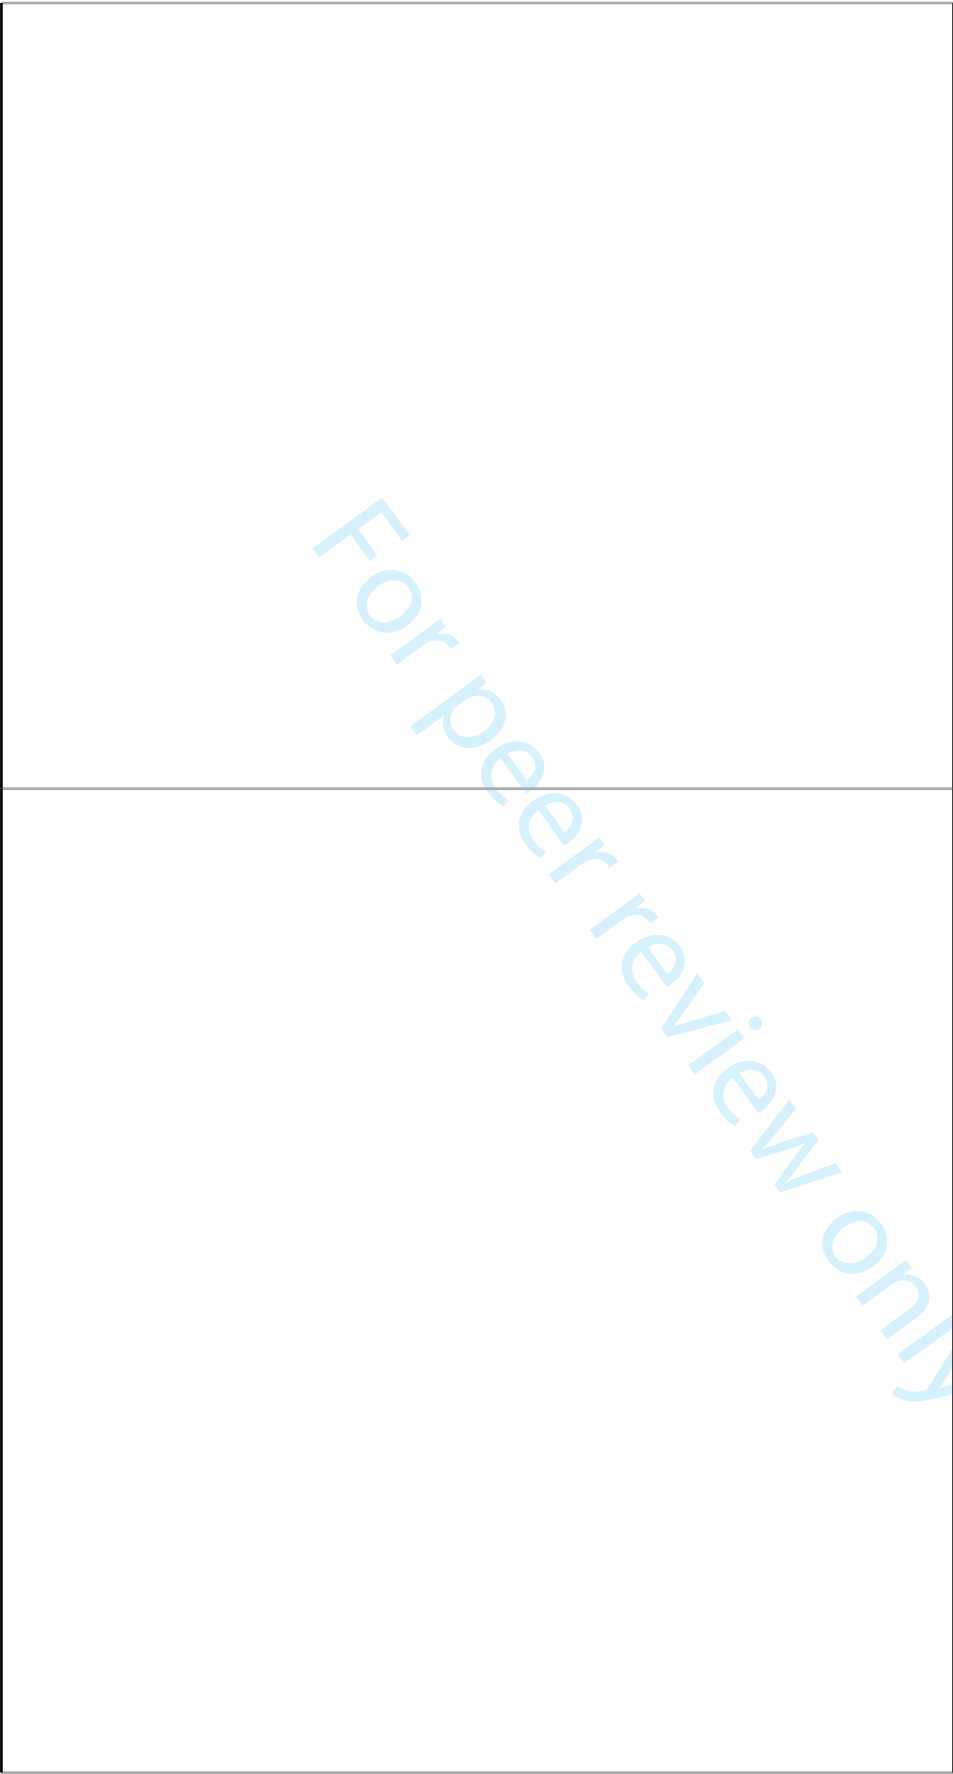

1  
2  
3  
4  
5  
6  
7  
8  
9  
10  
11  
12  
13  
14  
15  
16  
17  
18  
19  
20  
21  
22  
23  
24  
25  
26  
27  
28  
29  
30  
31  
32  
33  
34  
35  
36  
37  
38  
39  
40  
41  
42  
43  
44  
45  
46  
47  
48  
49  
50  
51  
52  
53  
54  
55  
56  
57  
58  
59  
60

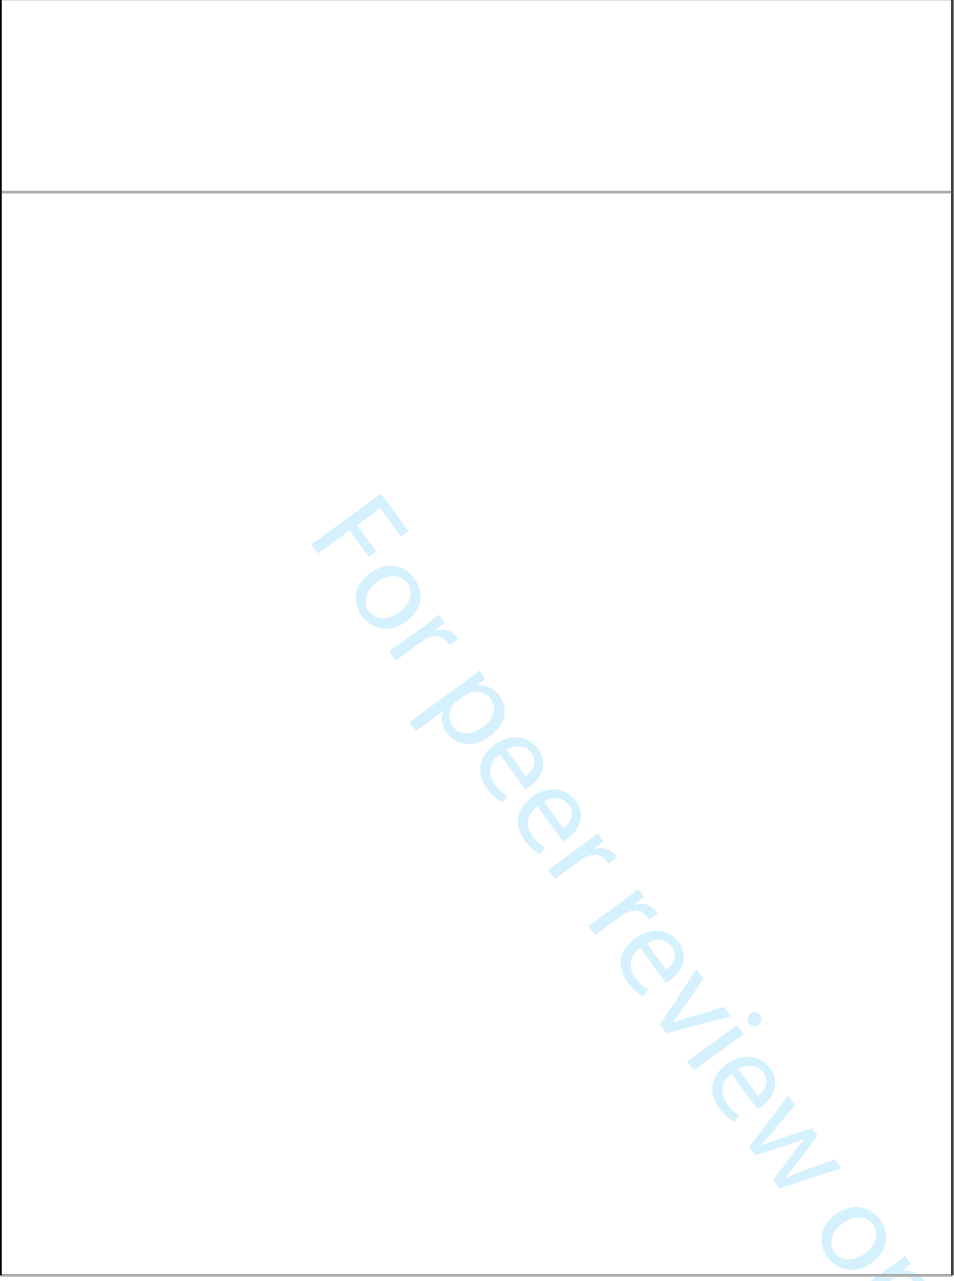

For peer review only

1  
2  
3  
4  
5  
6  
7  
8  
9  
10  
11  
12  
13  
14  
15  
16  
17  
18  
19  
20  
21  
22  
23  
24  
25  
26  
27  
28  
29  
30  
31  
32  
33  
34  
35  
36  
37  
38  
39  
40  
41  
42  
43  
44  
45  
46  
47  
48  
49  
50  
51  
52  
53  
54  
55  
56  
57  
58  
59  
60

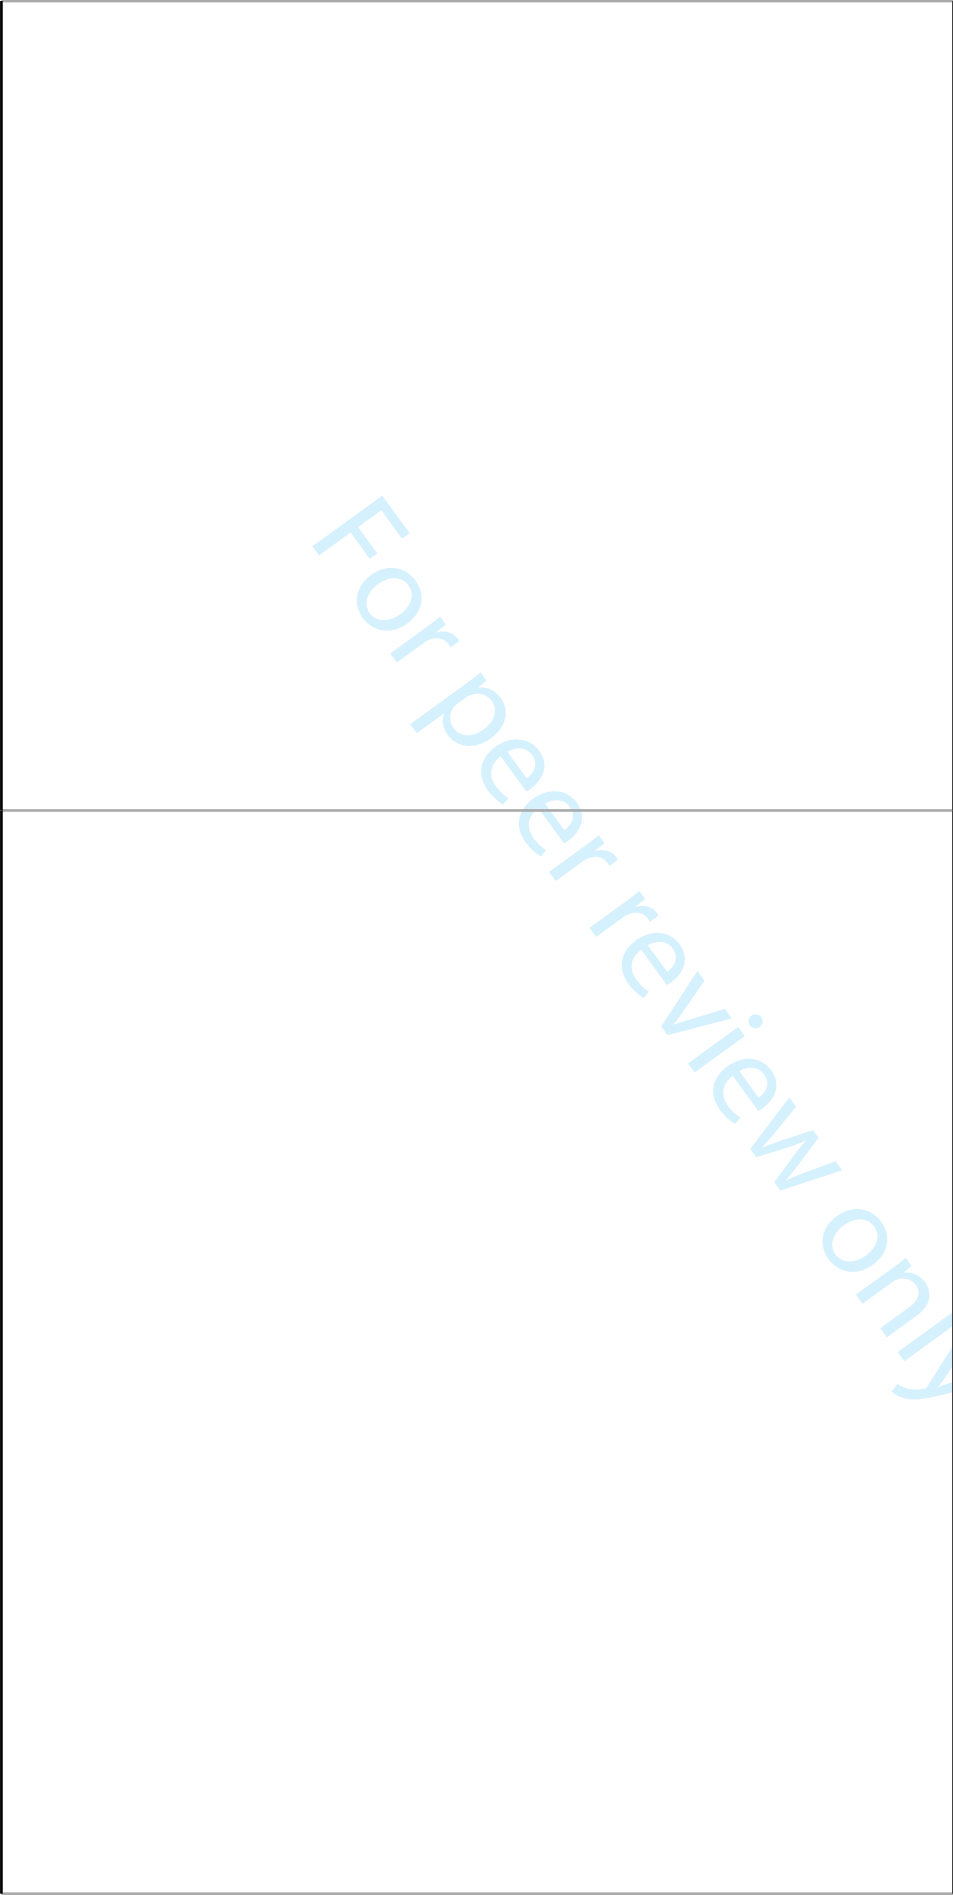

1  
2  
3  
4  
5  
6  
7  
8  
9  
10  
11  
12  
13  
14  
15  
16  
17  
18  
19  
20  
21  
22  
23  
24  
25  
26  
27  
28  
29  
30  
31  
32  
33  
34  
35  
36  
37  
38  
39  
40  
41  
42  
43  
44  
45  
46  
47  
48  
49  
50  
51  
52  
53  
54  
55  
56  
57  
58  
59  
60

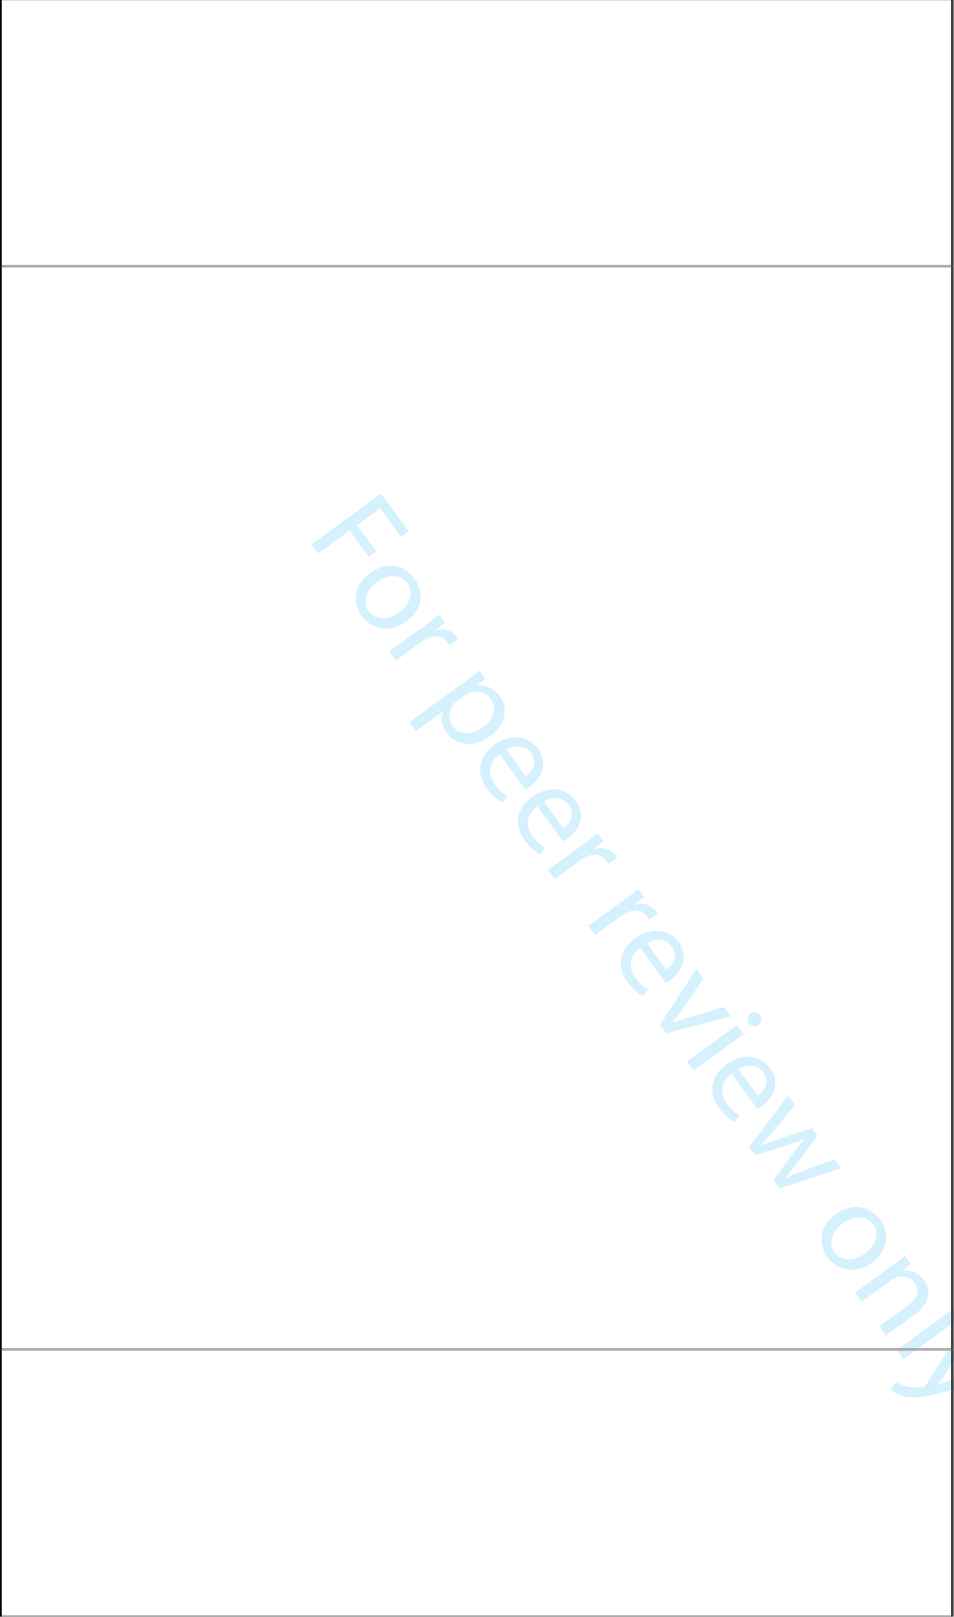

1  
2  
3  
4  
5  
6  
7  
8  
9  
10  
11  
12  
13  
14  
15  
16  
17  
18  
19  
20  
21  
22  
23  
24  
25  
26  
27  
28  
29  
30  
31  
32  
33  
34  
35  
36  
37  
38  
39  
40  
41  
42  
43  
44  
45  
46  
47  
48  
49  
50  
51  
52  
53  
54  
55  
56  
57  
58  
59  
60

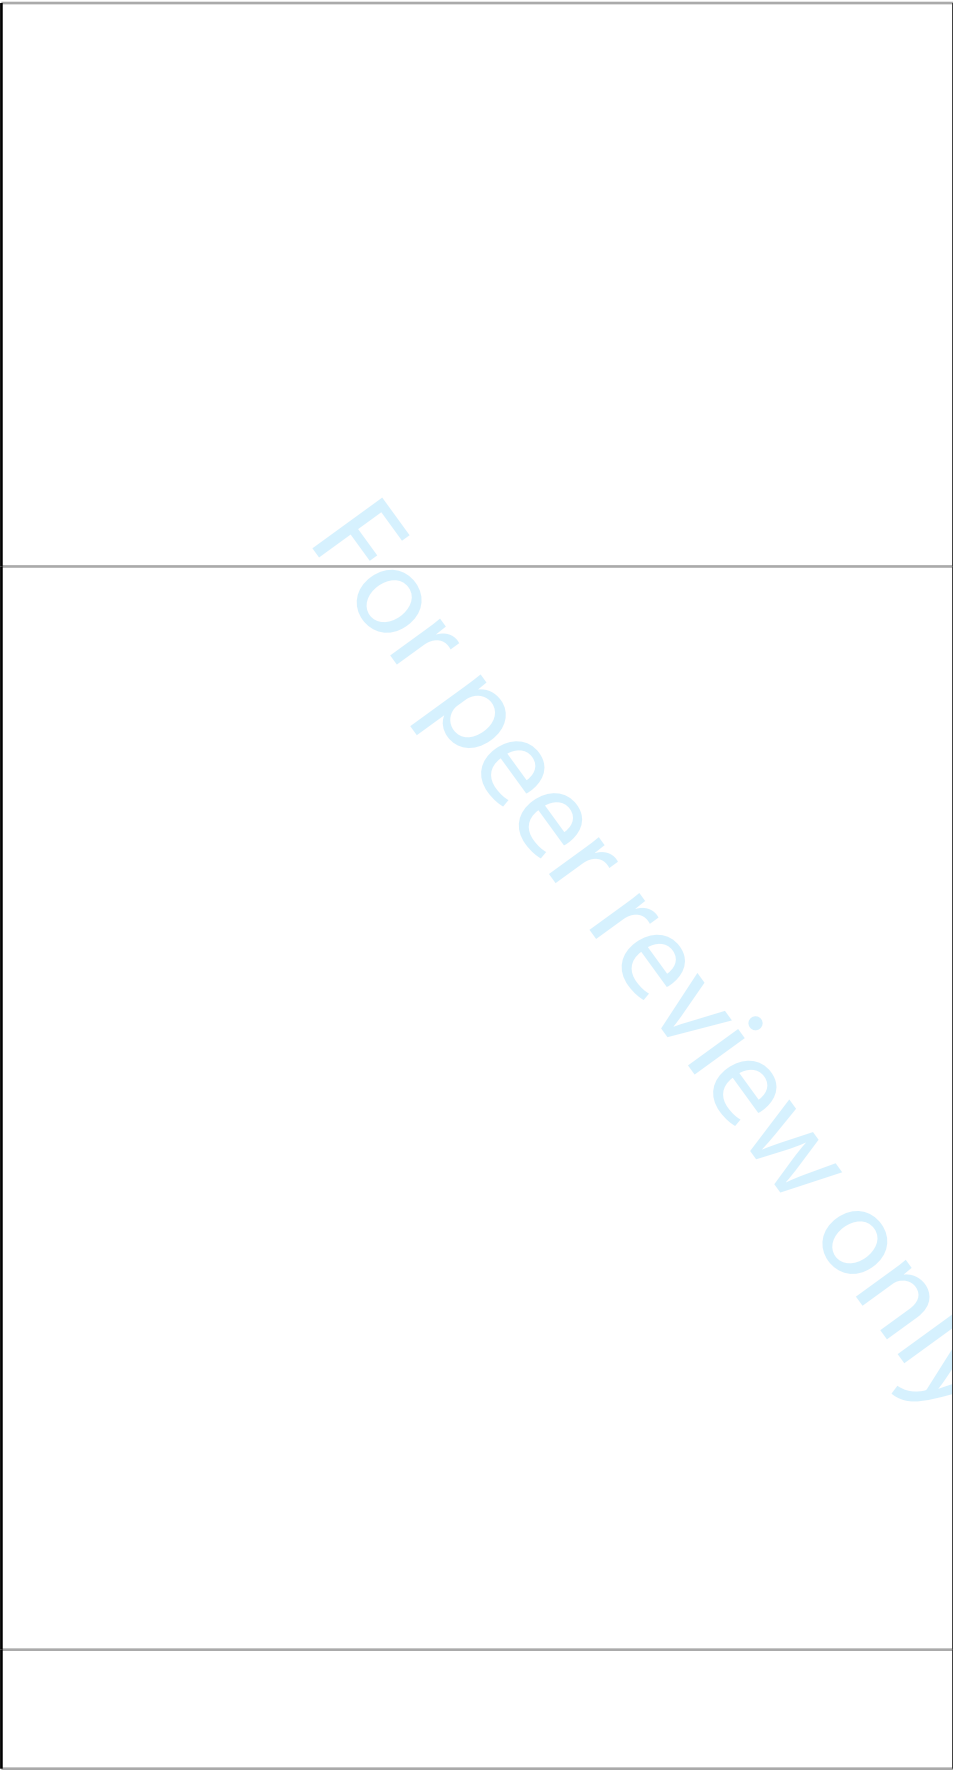

1  
2  
3  
4  
5  
6  
7  
8  
9  
10  
11  
12  
13  
14  
15  
16  
17  
18  
19  
20  
21  
22  
23  
24  
25  
26  
27  
28  
29  
30  
31  
32  
33  
34  
35  
36  
37  
38  
39  
40  
41  
42  
43  
44  
45  
46  
47  
48  
49  
50  
51  
52  
53  
54  
55  
56  
57  
58  
59  
60

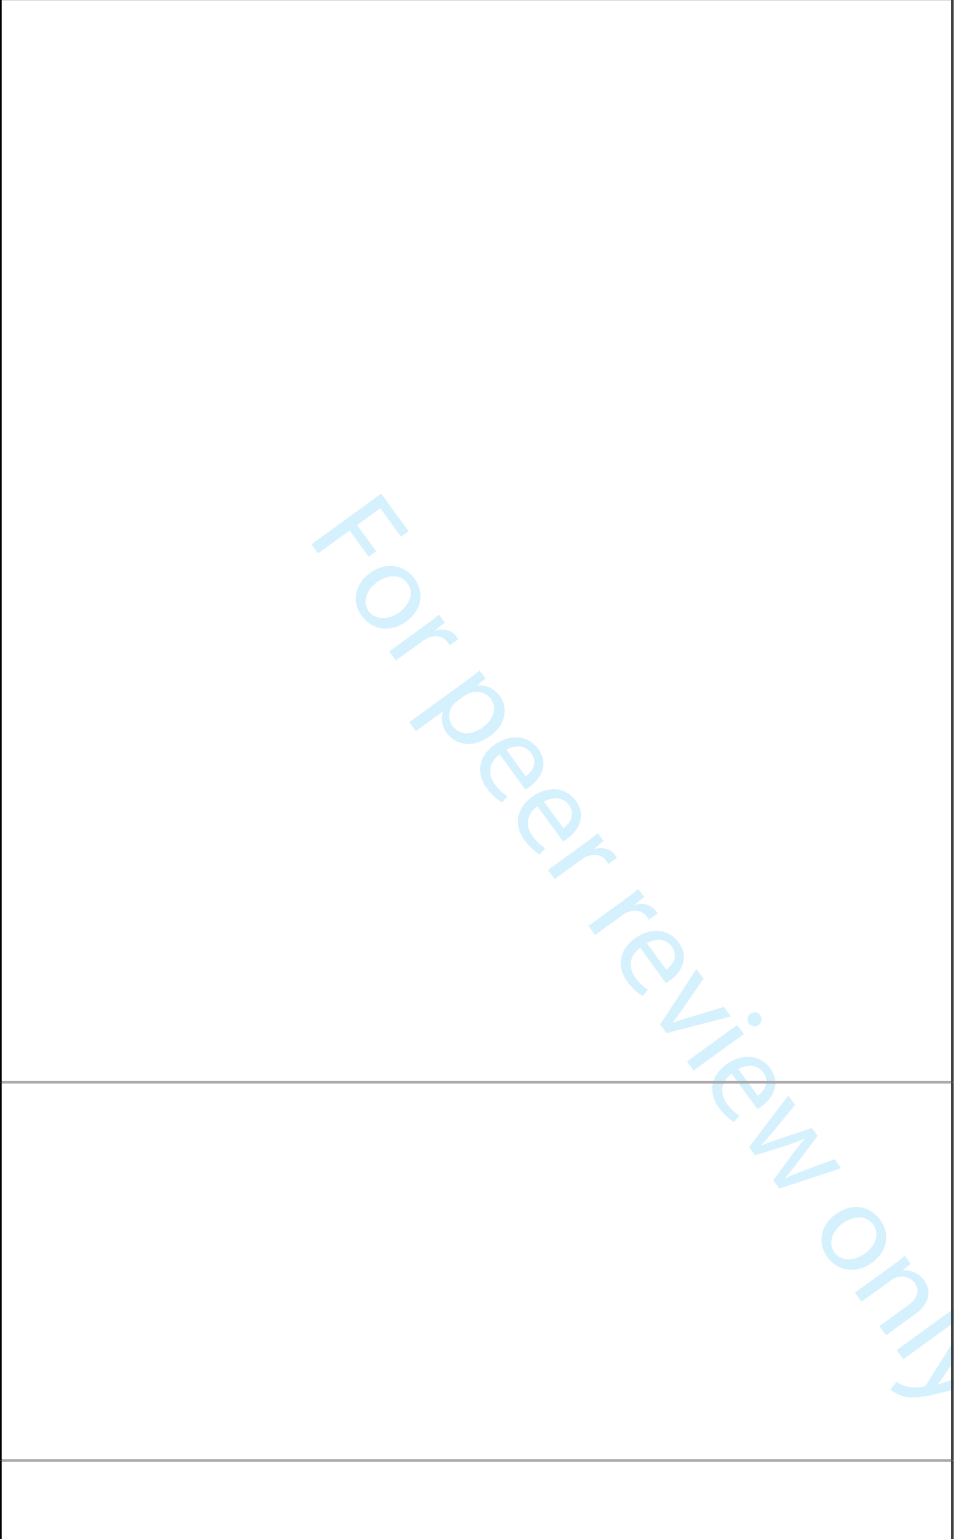

1  
2  
3  
4  
5  
6  
7  
8  
9  
10  
11  
12  
13  
14  
15  
16  
17  
18  
19  
20  
21  
22  
23  
24  
25  
26  
27  
28  
29  
30  
31  
32  
33  
34  
35  
36  
37  
38  
39  
40  
41  
42  
43  
44  
45  
46  
47  
48  
49  
50  
51  
52  
53  
54  
55  
56  
57  
58  
59  
60

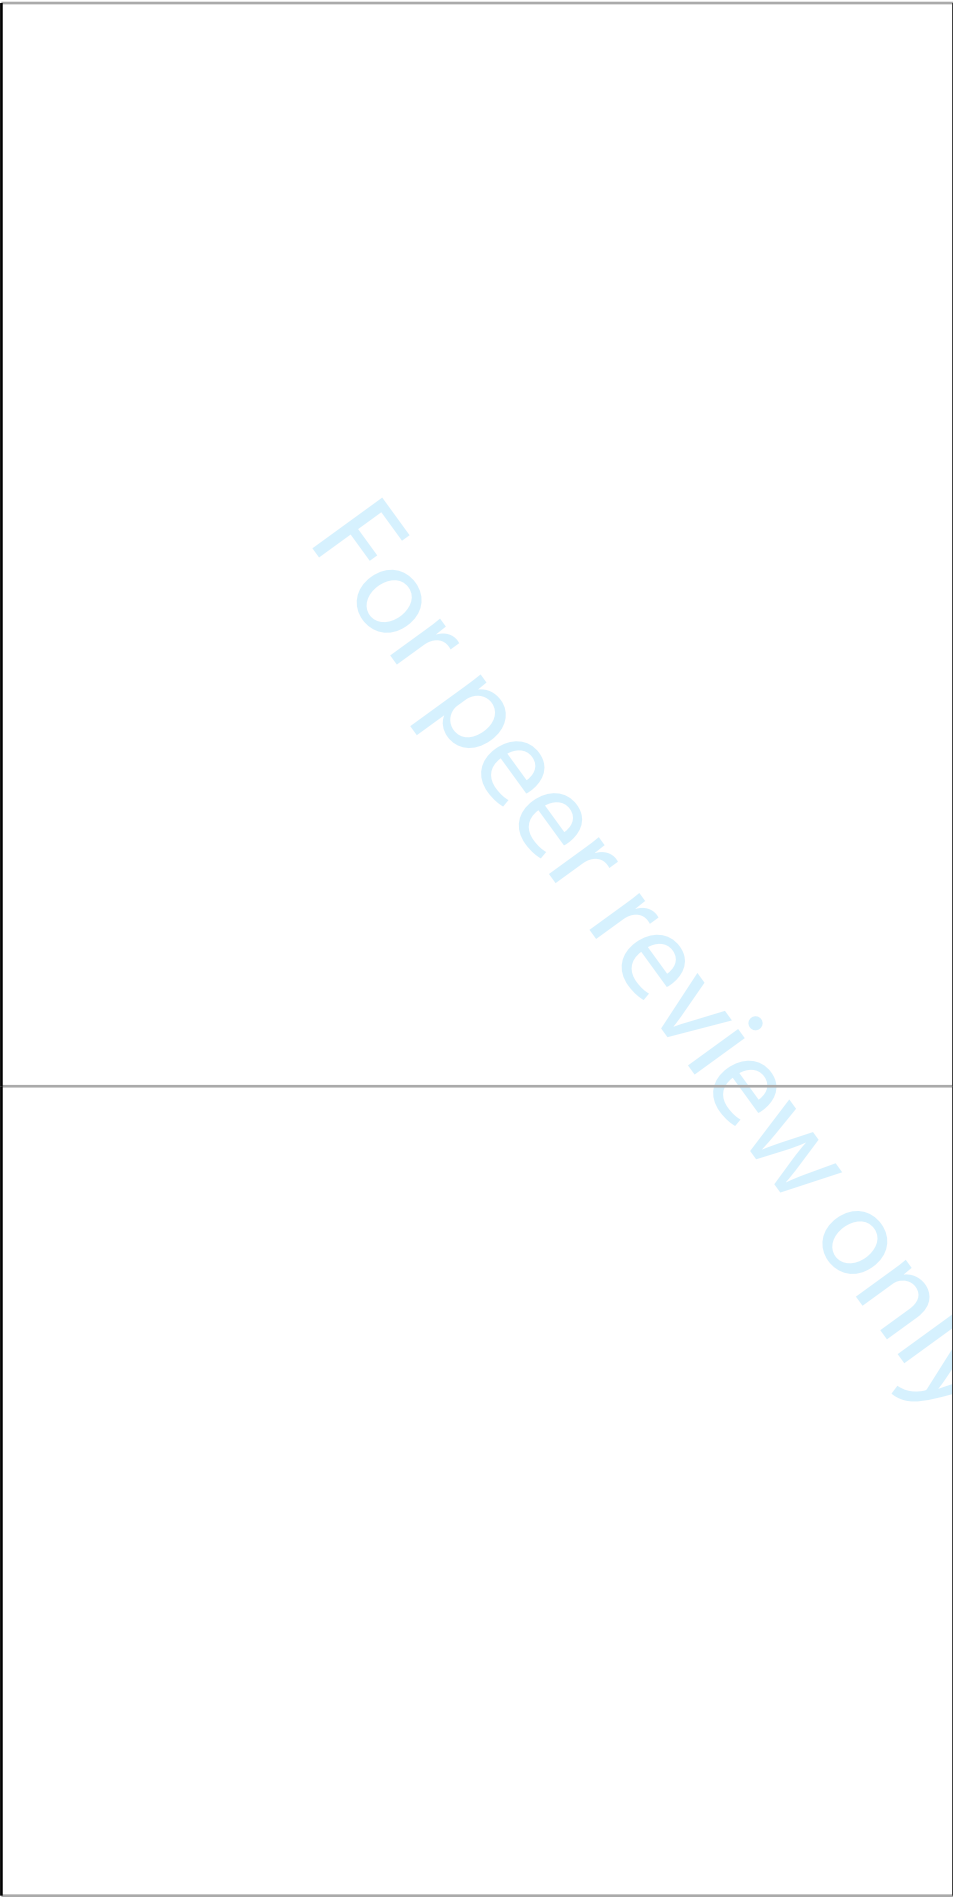

For peer review only



1  
2  
3  
4  
5  
6  
7  
8  
9  
10  
11  
12  
13  
14  
15  
16  
17  
18  
19  
20  
21  
22  
23  
24  
25  
26  
27  
28  
29  
30  
31  
32  
33  
34  
35  
36  
37  
38  
39  
40  
41  
42  
43  
44  
45  
46  
47  
48  
49  
50  
51  
52  
53  
54  
55  
56  
57  
58  
59  
60

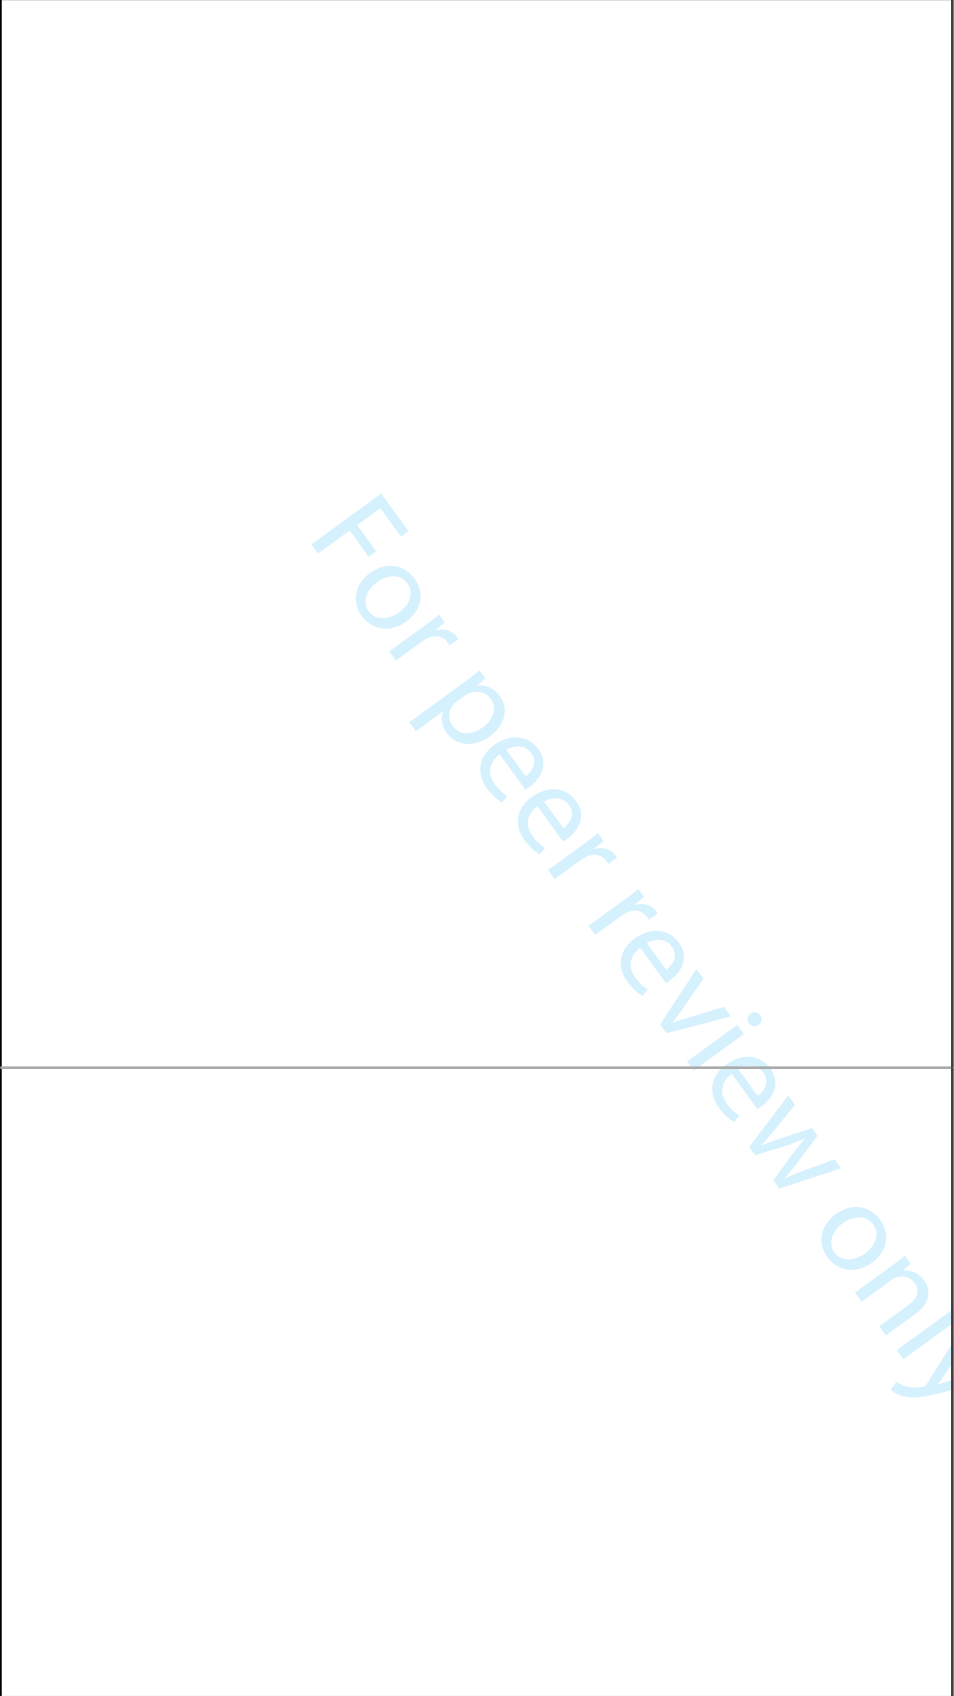

For peer review only

1  
2  
3  
4  
5  
6  
7  
8  
9  
10  
11  
12  
13  
14  
15  
16  
17  
18  
19  
20  
21  
22  
23  
24  
25  
26  
27  
28  
29  
30  
31  
32  
33  
34  
35  
36  
37  
38  
39  
40  
41  
42  
43  
44  
45  
46  
47  
48  
49  
50  
51  
52  
53  
54  
55  
56  
57  
58  
59  
60

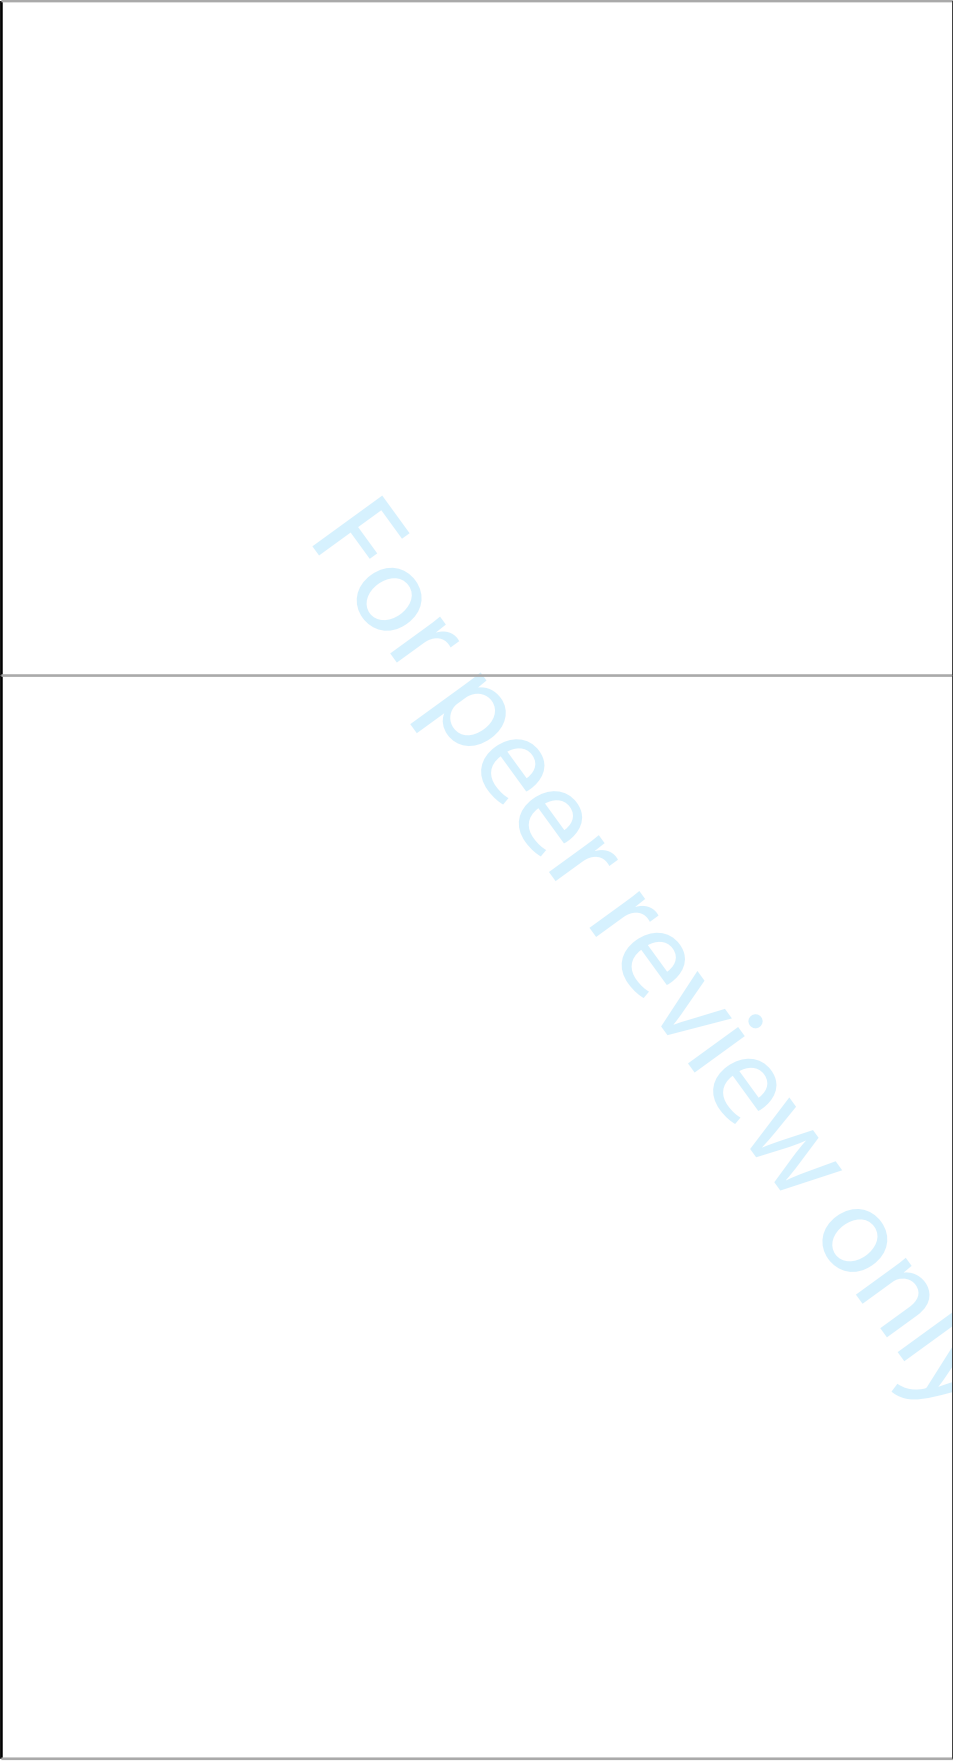

1  
2  
3  
4  
5  
6  
7  
8  
9  
10  
11  
12  
13  
14  
15  
16  
17  
18  
19  
20  
21  
22  
23  
24  
25  
26  
27  
28  
29  
30  
31  
32  
33  
34  
35  
36  
37  
38  
39  
40  
41  
42  
43  
44  
45  
46  
47  
48  
49  
50  
51  
52  
53  
54  
55  
56  
57  
58  
59  
60

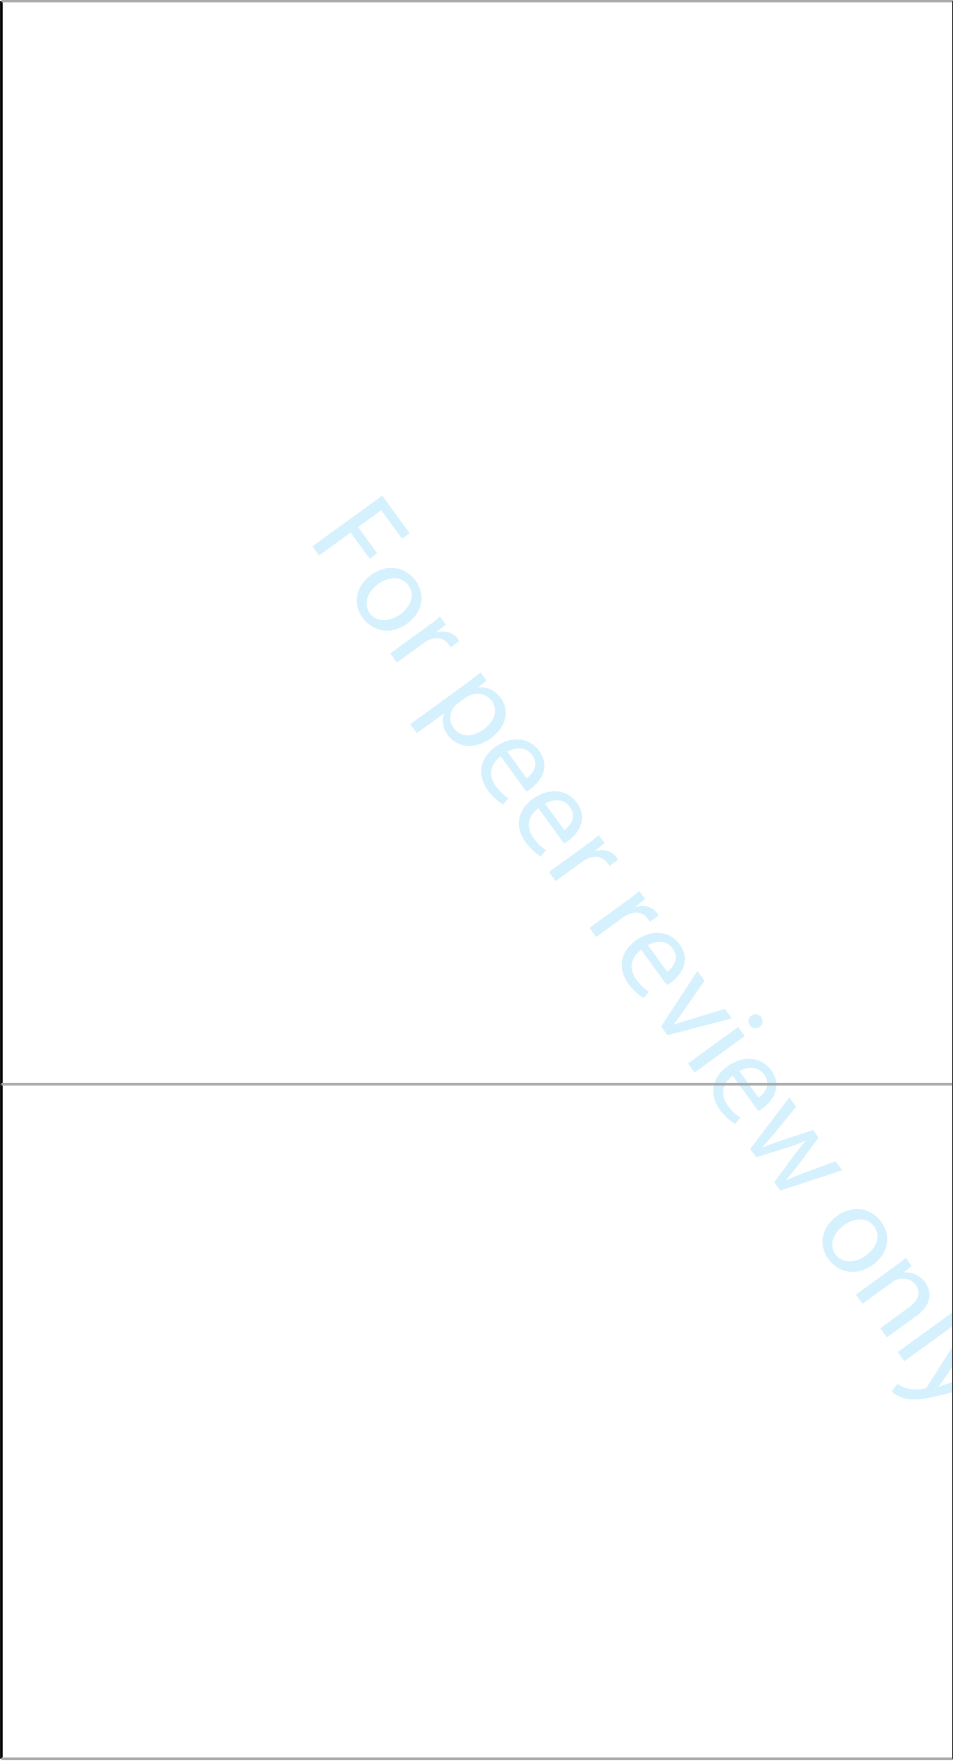

For peer review only

1  
2  
3  
4  
5  
6  
7  
8  
9  
10  
11  
12  
13  
14  
15  
16  
17  
18  
19  
20  
21  
22  
23  
24  
25  
26  
27  
28  
29  
30  
31  
32  
33  
34  
35  
36  
37  
38  
39  
40  
41  
42  
43  
44  
45  
46  
47  
48  
49  
50  
51  
52  
53  
54  
55  
56  
57  
58  
59  
60

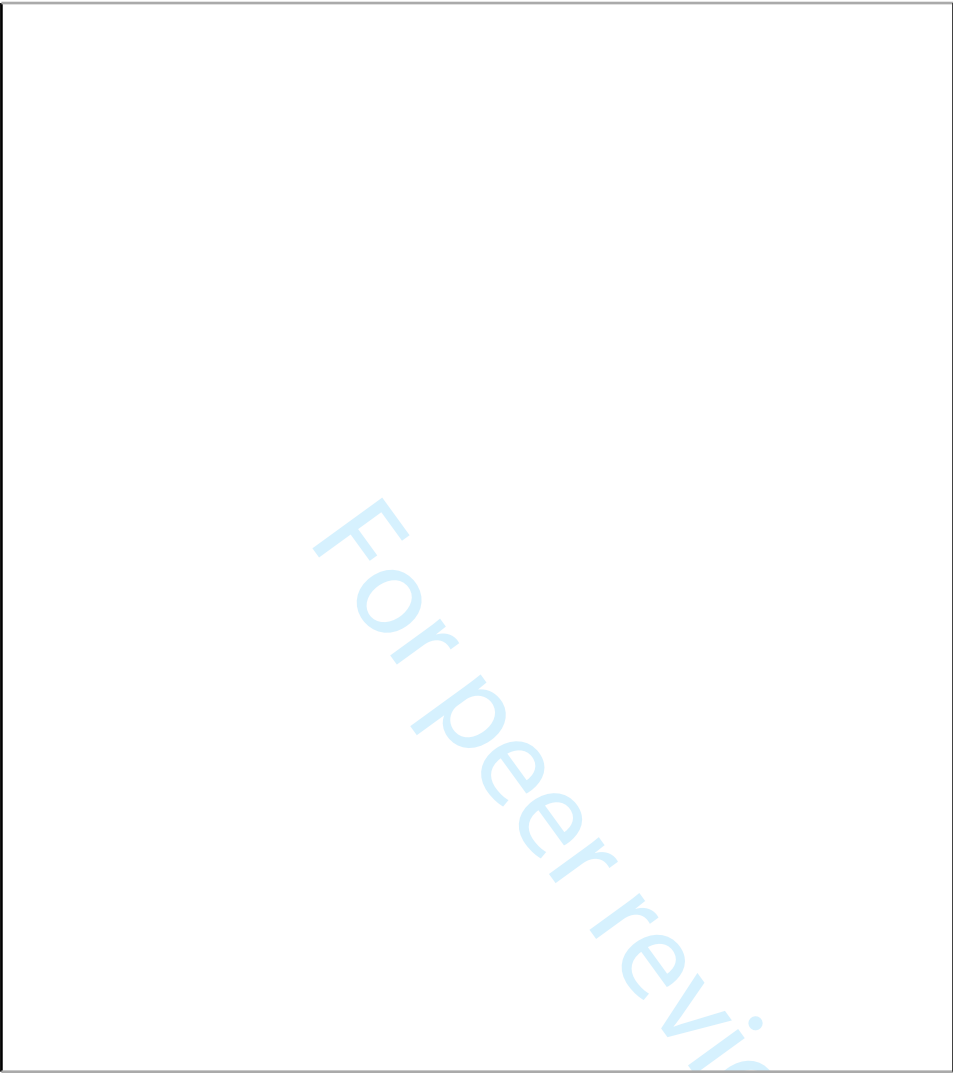

For peer review only

1  
2  
3  
4  
5  
6  
7  
8  
9  
10  
11  
12  
13  
14  
15  
16  
17  
18  
19  
20  
21  
22  
23  
24  
25  
26  
27  
28  
29  
30  
31  
32  
33  
34  
35  
36  
37  
38  
39  
40  
41  
42  
43  
44  
45  
46  
47  
48  
49  
50  
51  
52  
53  
54  
55  
56  
57  
58  
59  
60

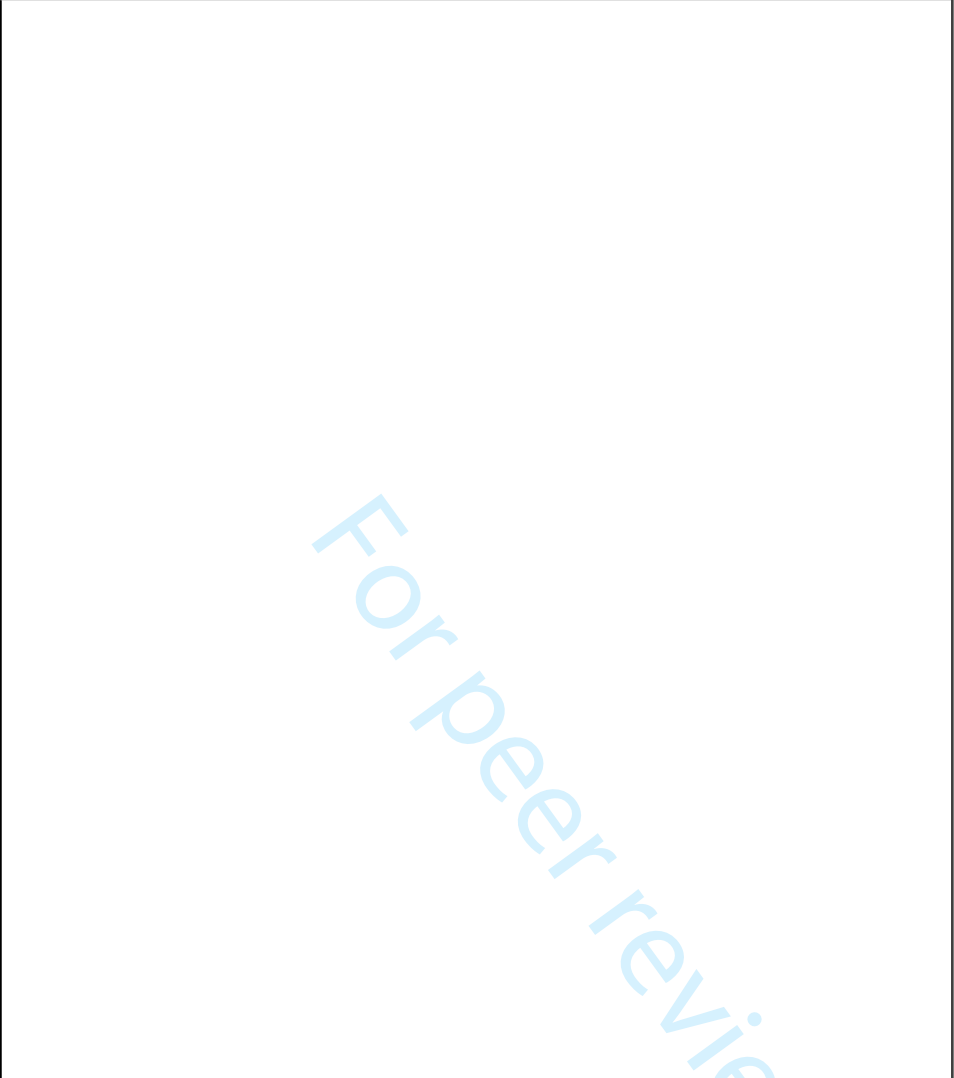

For peer review only

1  
2  
3  
4  
5  
6  
7  
8  
9  
10  
11  
12  
13  
14  
15  
16  
17  
18  
19  
20  
21  
22  
23  
24  
25  
26  
27  
28  
29  
30  
31  
32  
33  
34  
35  
36  
37  
38  
39  
40  
41  
42  
43  
44  
45  
46  
47  
48  
49  
50  
51  
52  
53  
54  
55  
56  
57  
58  
59  
60

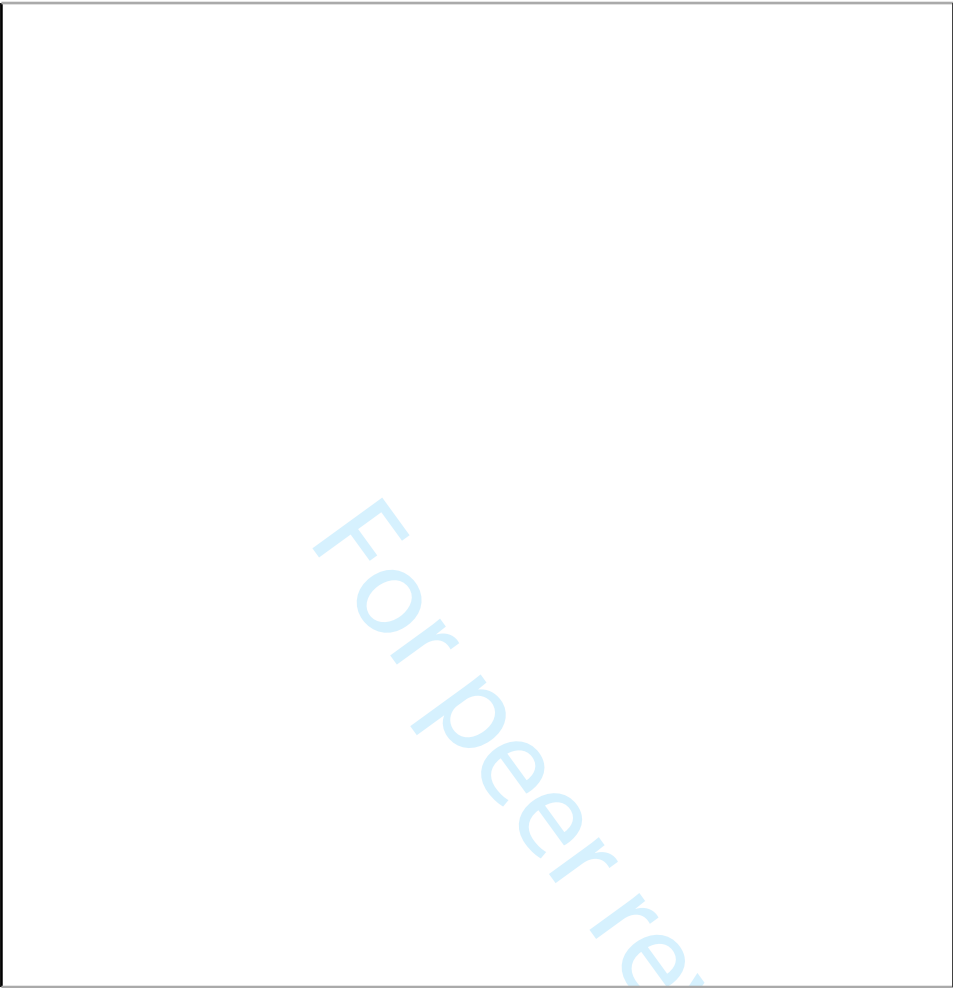

For peer review only

1  
2  
3  
4  
5  
6  
7  
8  
9  
10  
11  
12  
13  
14  
15  
16  
17  
18  
19  
20  
21  
22  
23  
24  
25  
26  
27  
28  
29  
30  
31  
32  
33  
34  
35  
36  
37  
38  
39  
40  
41  
42  
43  
44  
45  
46  
47  
48  
49  
50  
51  
52  
53  
54  
55  
56  
57  
58  
59  
60

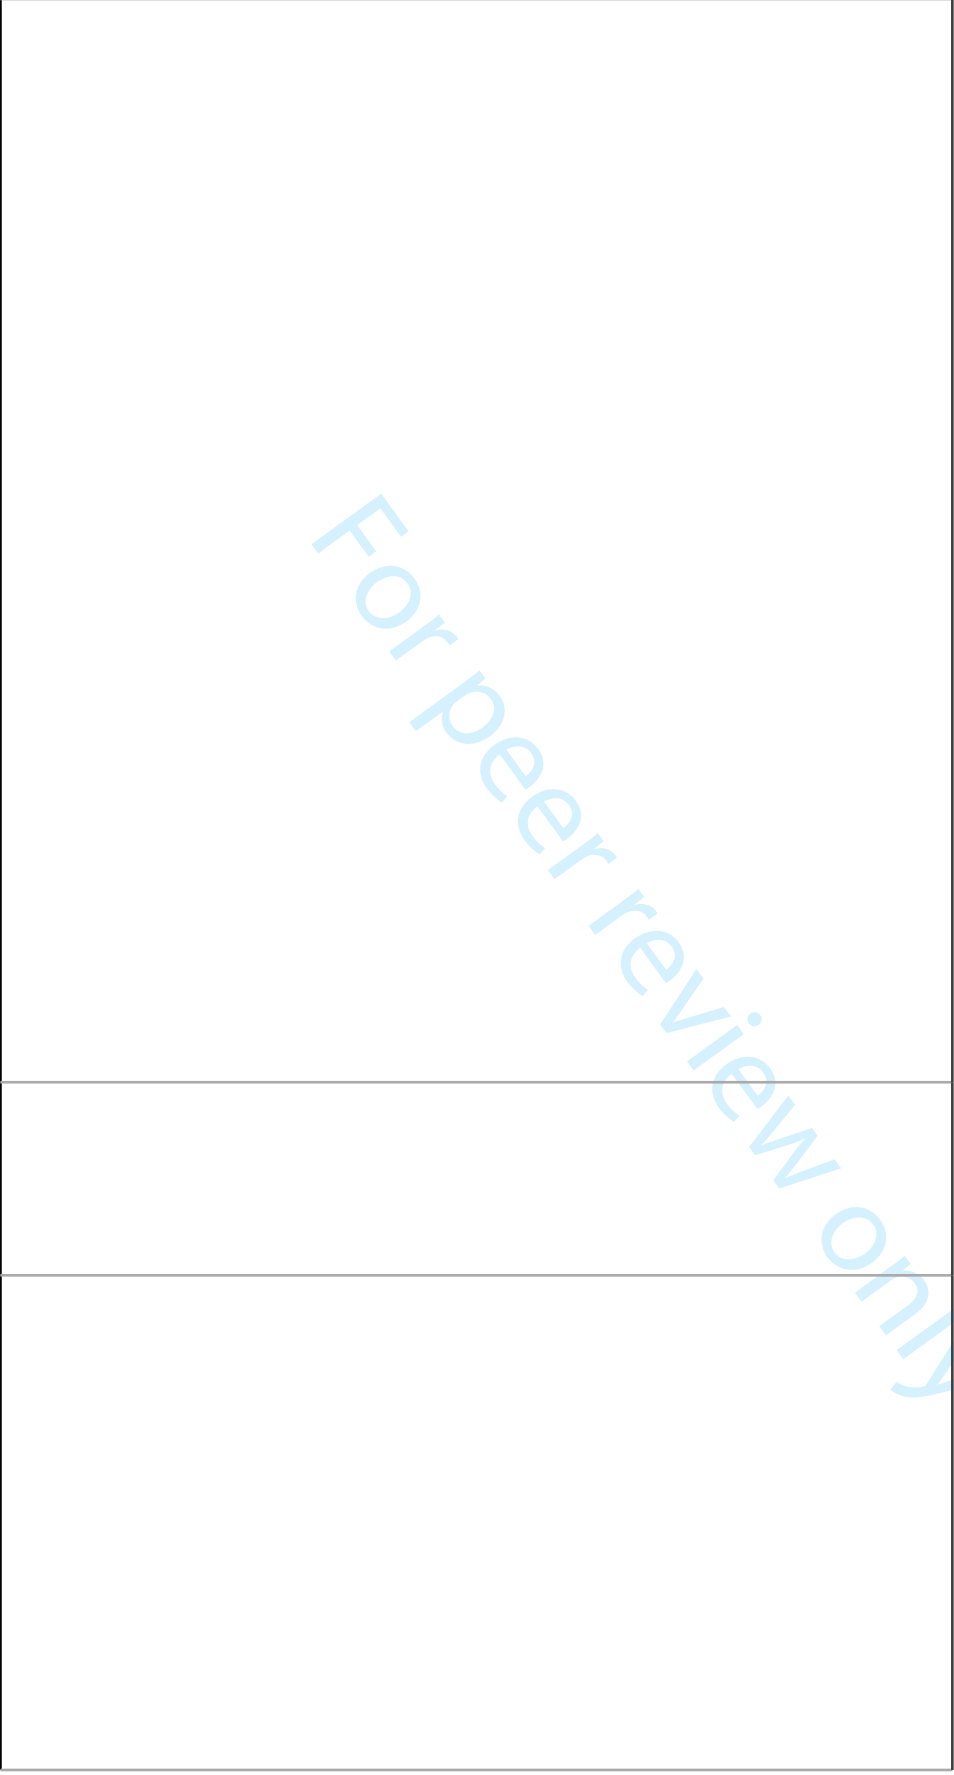

1  
2  
3  
4  
5  
6  
7  
8  
9  
10  
11  
12  
13  
14  
15  
16  
17  
18  
19  
20  
21  
22  
23  
24  
25  
26  
27  
28  
29  
30  
31  
32  
33  
34  
35  
36  
37  
38  
39  
40  
41  
42  
43  
44  
45  
46  
47  
48  
49  
50  
51  
52  
53  
54  
55  
56  
57  
58  
59  
60

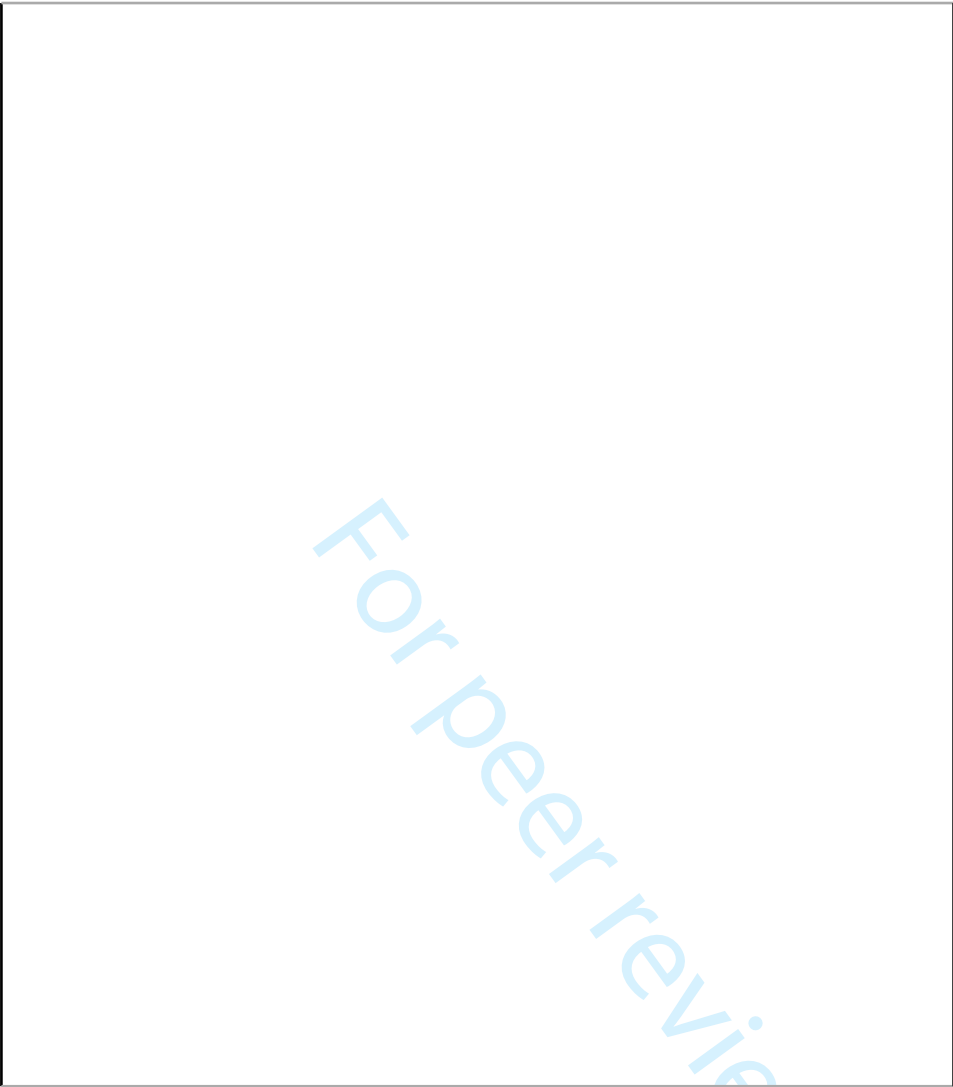

For peer review only



1  
2  
3  
4  
5  
6  
7  
8  
9  
10  
11  
12  
13  
14  
15  
16  
17  
18  
19  
20  
21  
22  
23  
24  
25  
26  
27  
28  
29  
30  
31  
32  
33  
34  
35  
36  
37  
38  
39  
40  
41  
42  
43  
44  
45  
46  
47  
48  
49  
50  
51  
52  
53  
54  
55  
56  
57  
58  
59  
60

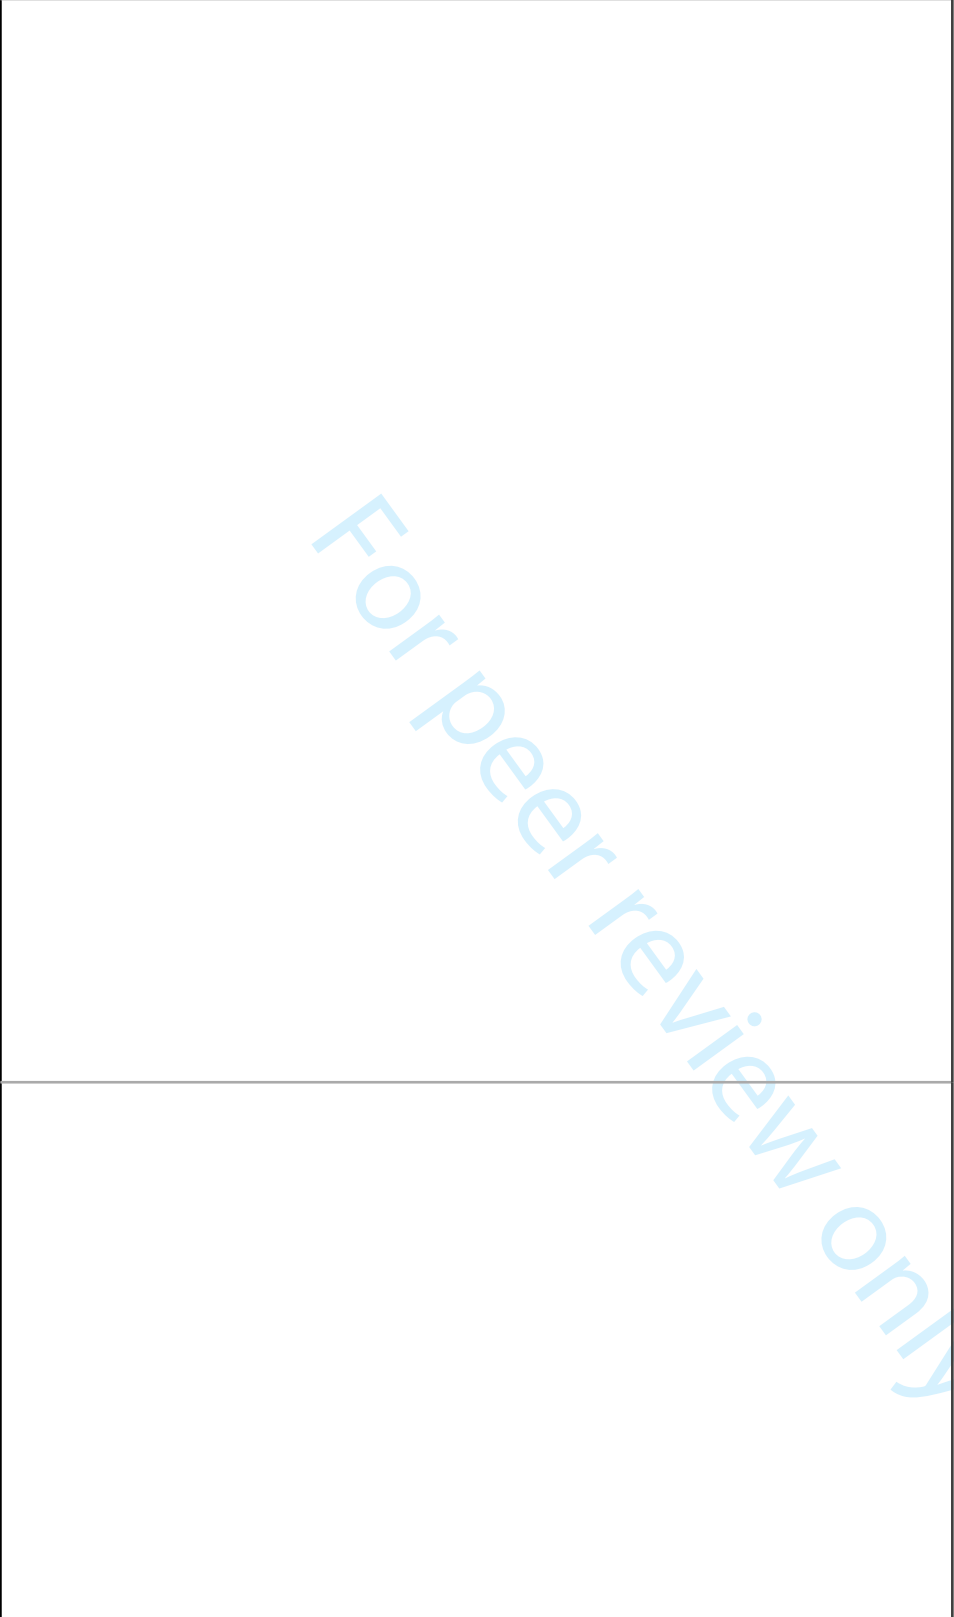

For peer review only

1  
2  
3  
4  
5  
6  
7  
8  
9  
10  
11  
12  
13  
14  
15  
16  
17  
18  
19  
20  
21  
22  
23  
24  
25  
26  
27  
28  
29  
30  
31  
32  
33  
34  
35  
36  
37  
38  
39  
40  
41  
42  
43  
44  
45  
46  
47  
48  
49  
50  
51  
52  
53  
54  
55  
56  
57  
58  
59  
60



For peer review only

1  
2  
3  
4  
5  
6  
7  
8  
9  
10  
11  
12  
13  
14  
15  
16  
17  
18  
19  
20  
21  
22  
23  
24  
25  
26  
27  
28  
29  
30  
31  
32  
33  
34  
35  
36  
37  
38  
39  
40  
41  
42  
43  
44  
45  
46  
47  
48  
49  
50  
51  
52  
53  
54  
55  
56  
57  
58  
59  
60

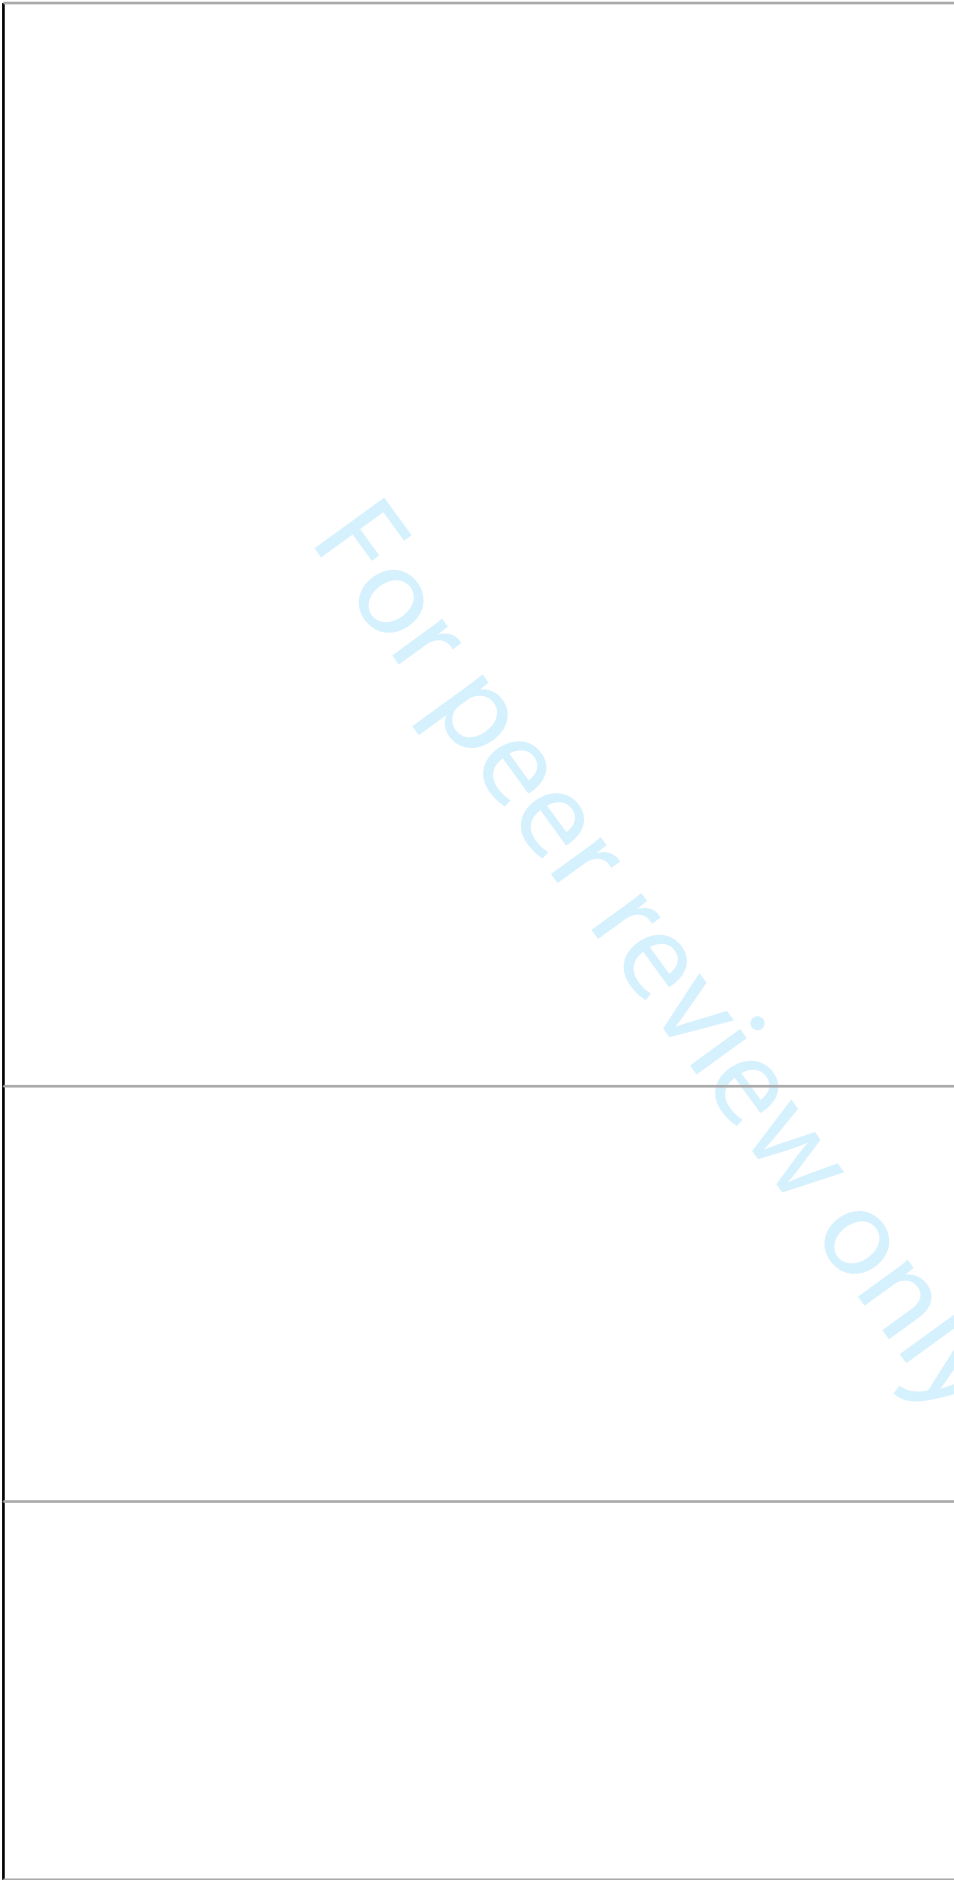

1  
2  
3  
4  
5  
6  
7  
8  
9  
10  
11  
12  
13  
14  
15  
16  
17  
18  
19  
20  
21  
22  
23  
24  
25  
26  
27  
28  
29  
30  
31  
32  
33  
34  
35  
36  
37  
38  
39  
40  
41  
42  
43  
44  
45  
46  
47  
48  
49  
50  
51  
52  
53  
54  
55  
56  
57  
58  
59  
60

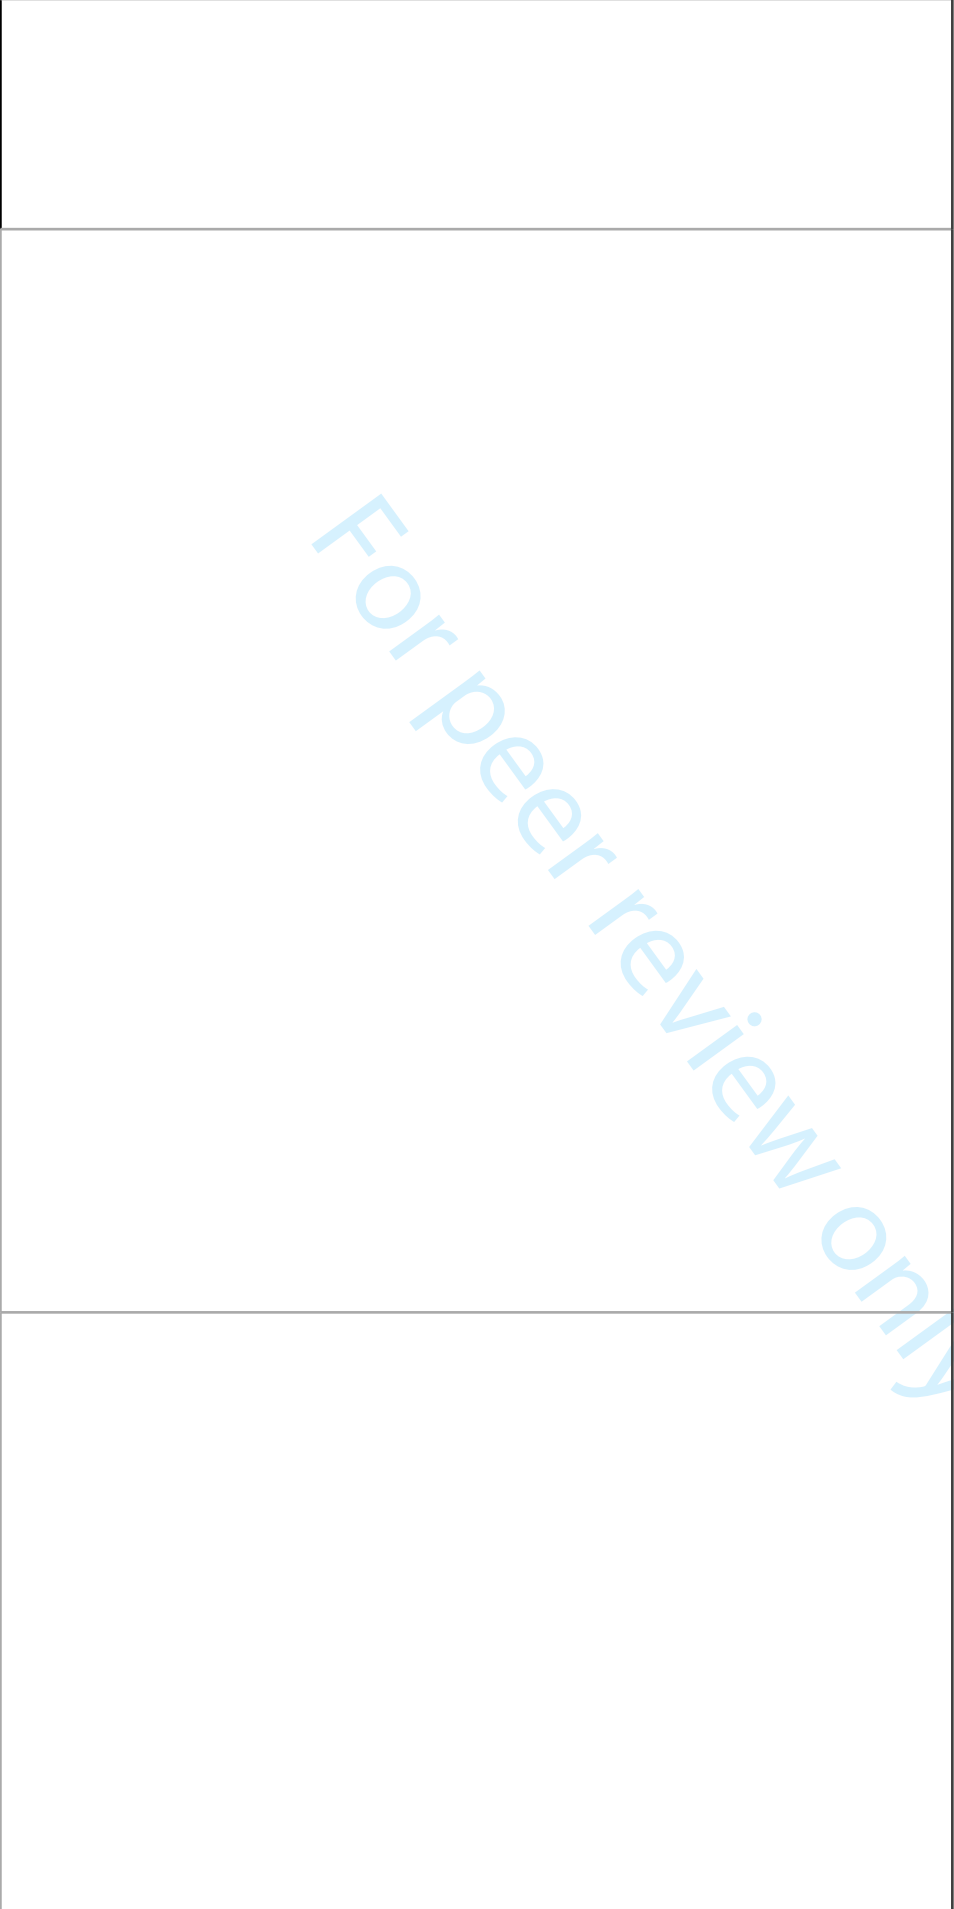

1  
2  
3  
4  
5  
6  
7  
8  
9  
10  
11  
12  
13  
14  
15  
16  
17  
18  
19  
20  
21  
22  
23  
24  
25  
26  
27  
28  
29  
30  
31  
32  
33  
34  
35  
36  
37  
38  
39  
40  
41  
42  
43  
44  
45  
46  
47  
48  
49  
50  
51  
52  
53  
54  
55  
56  
57  
58  
59  
60

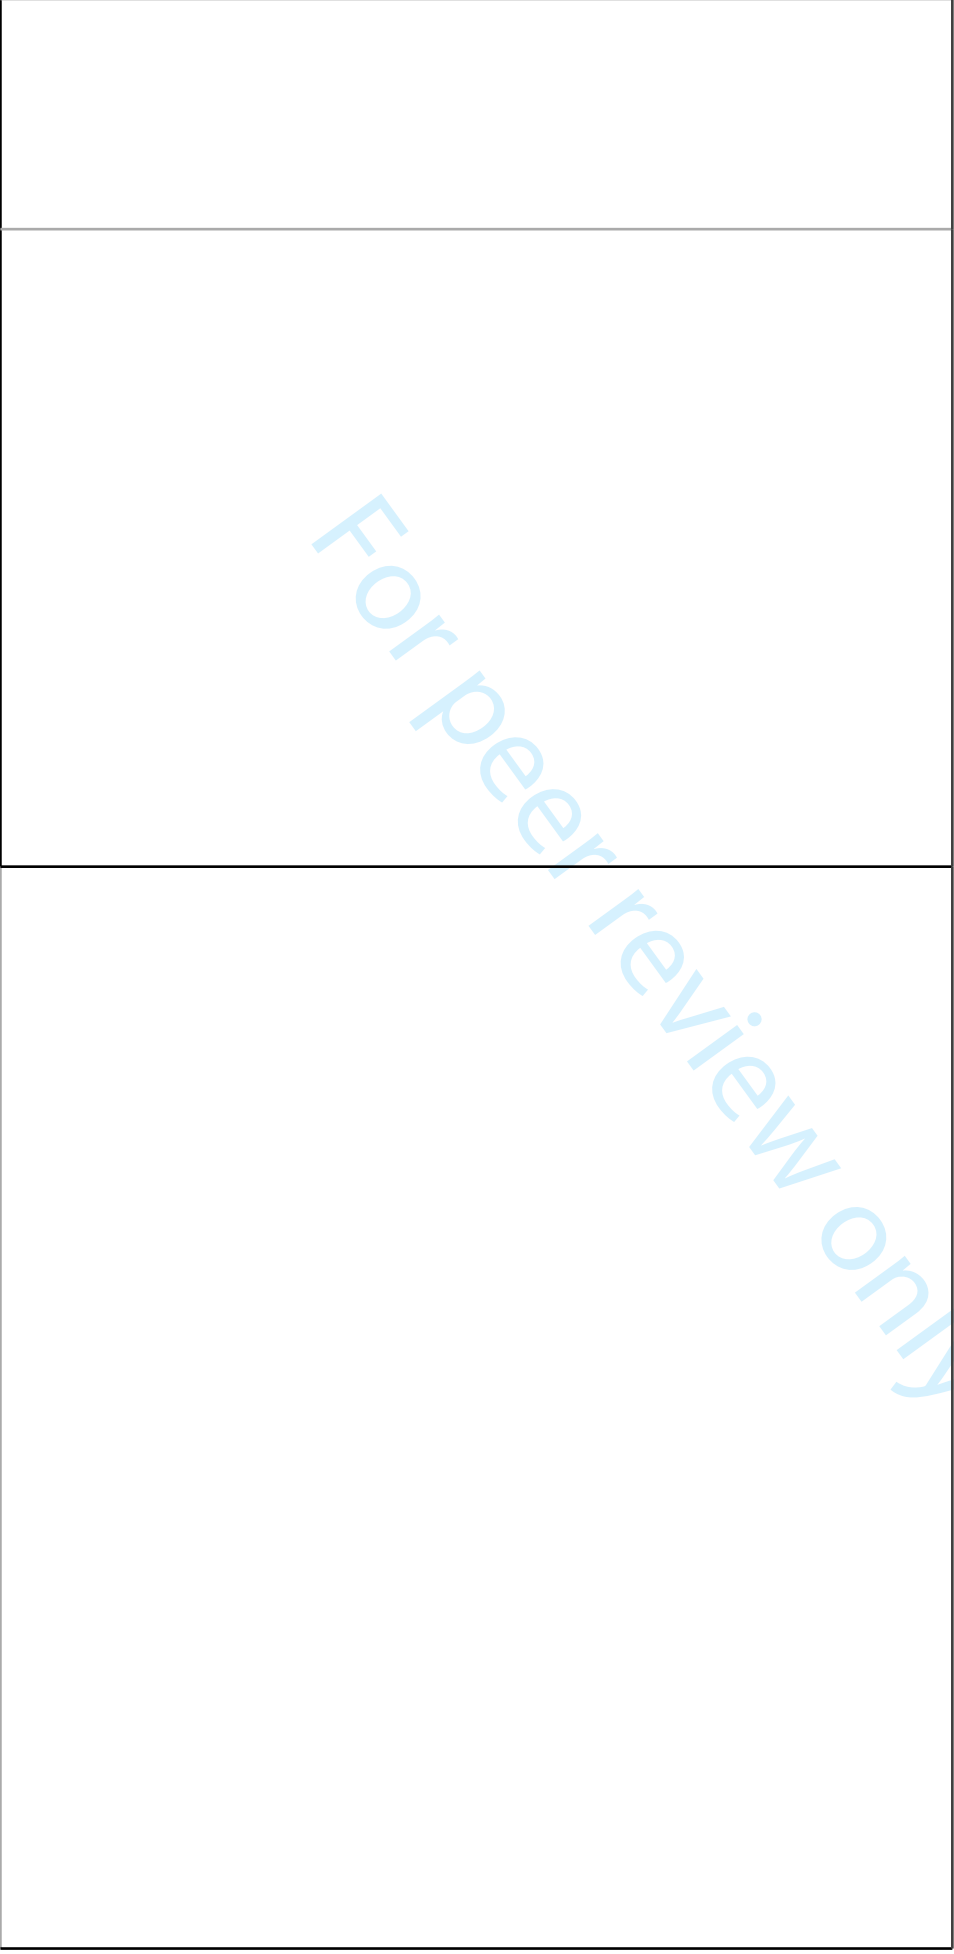



1  
2  
3  
4  
5  
6  
7  
8  
9  
10  
11  
12  
13  
14  
15  
16  
17  
18  
19  
20  
21  
22  
23  
24  
25  
26  
27  
28  
29  
30  
31  
32  
33  
34  
35  
36  
37  
38  
39  
40  
41  
42  
43  
44  
45  
46  
47  
48  
49  
50  
51  
52  
53  
54  
55  
56  
57  
58  
59  
60

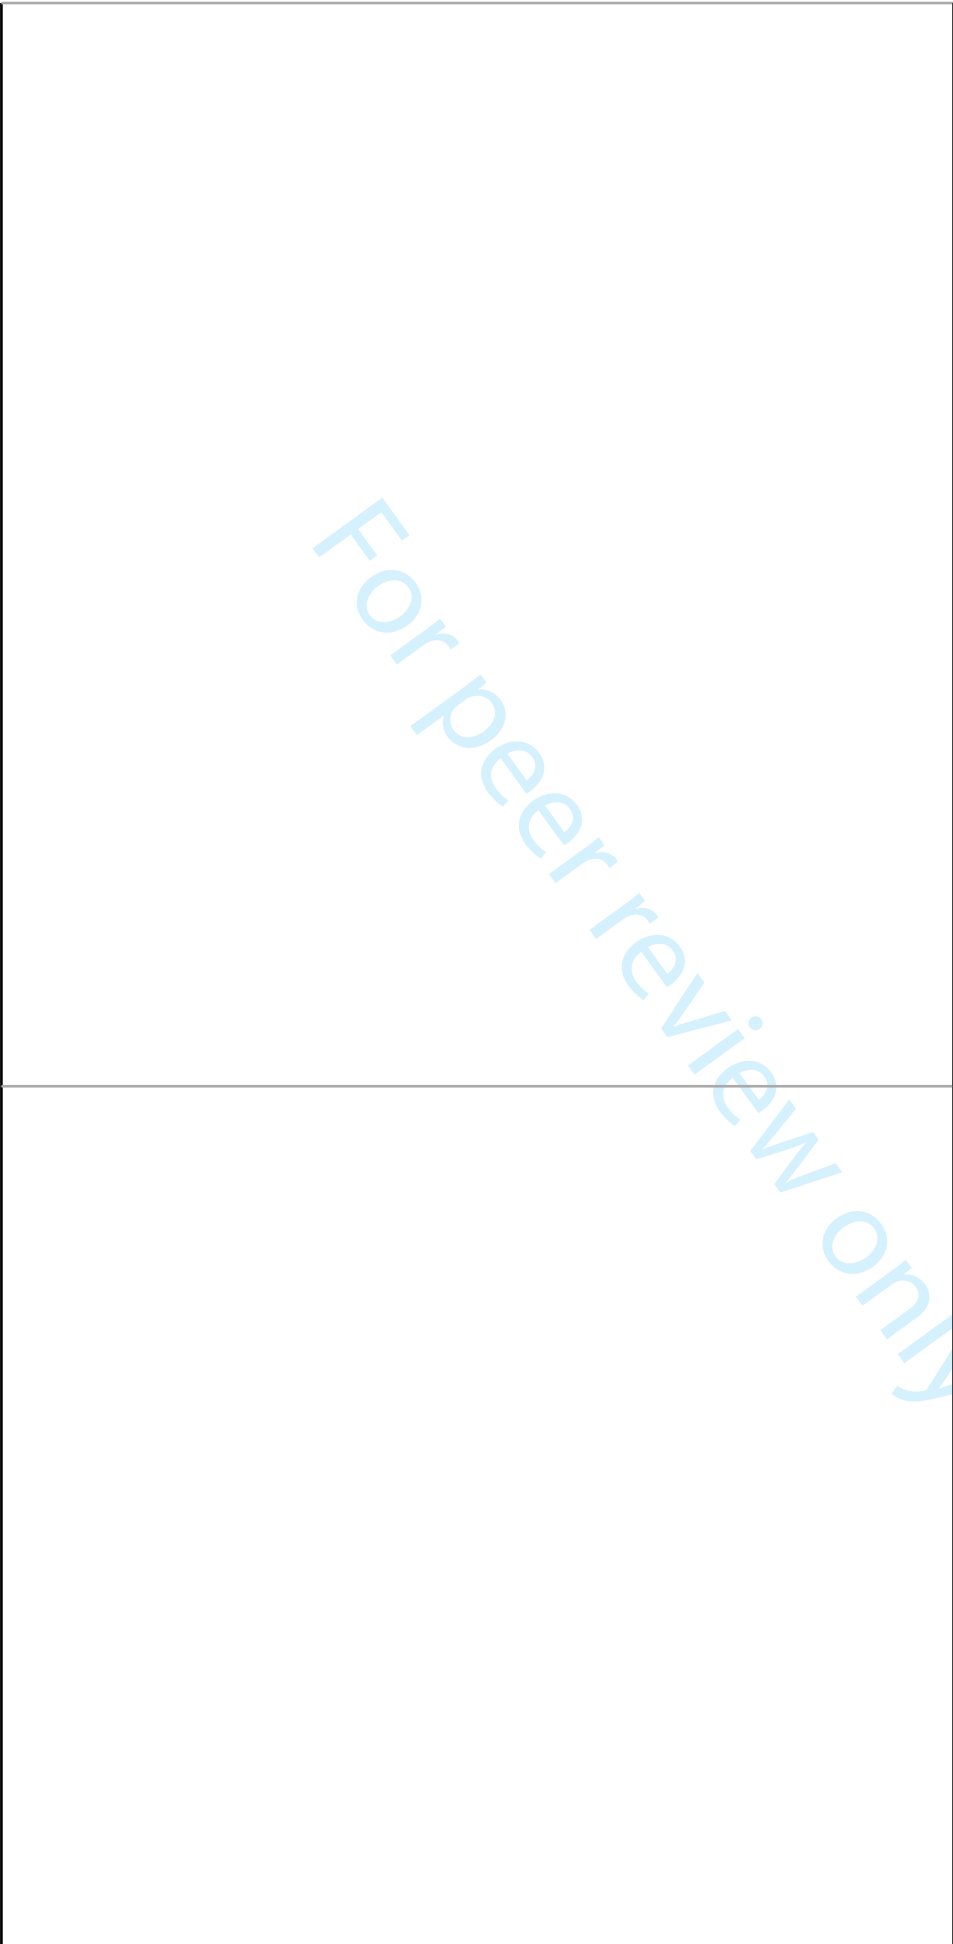

1  
2  
3  
4  
5  
6  
7  
8  
9  
10  
11  
12  
13  
14  
15  
16  
17  
18  
19  
20  
21  
22  
23  
24  
25  
26  
27  
28  
29  
30  
31  
32  
33  
34  
35  
36  
37  
38  
39  
40  
41  
42  
43  
44  
45  
46  
47  
48  
49  
50  
51  
52  
53  
54  
55  
56  
57  
58  
59  
60

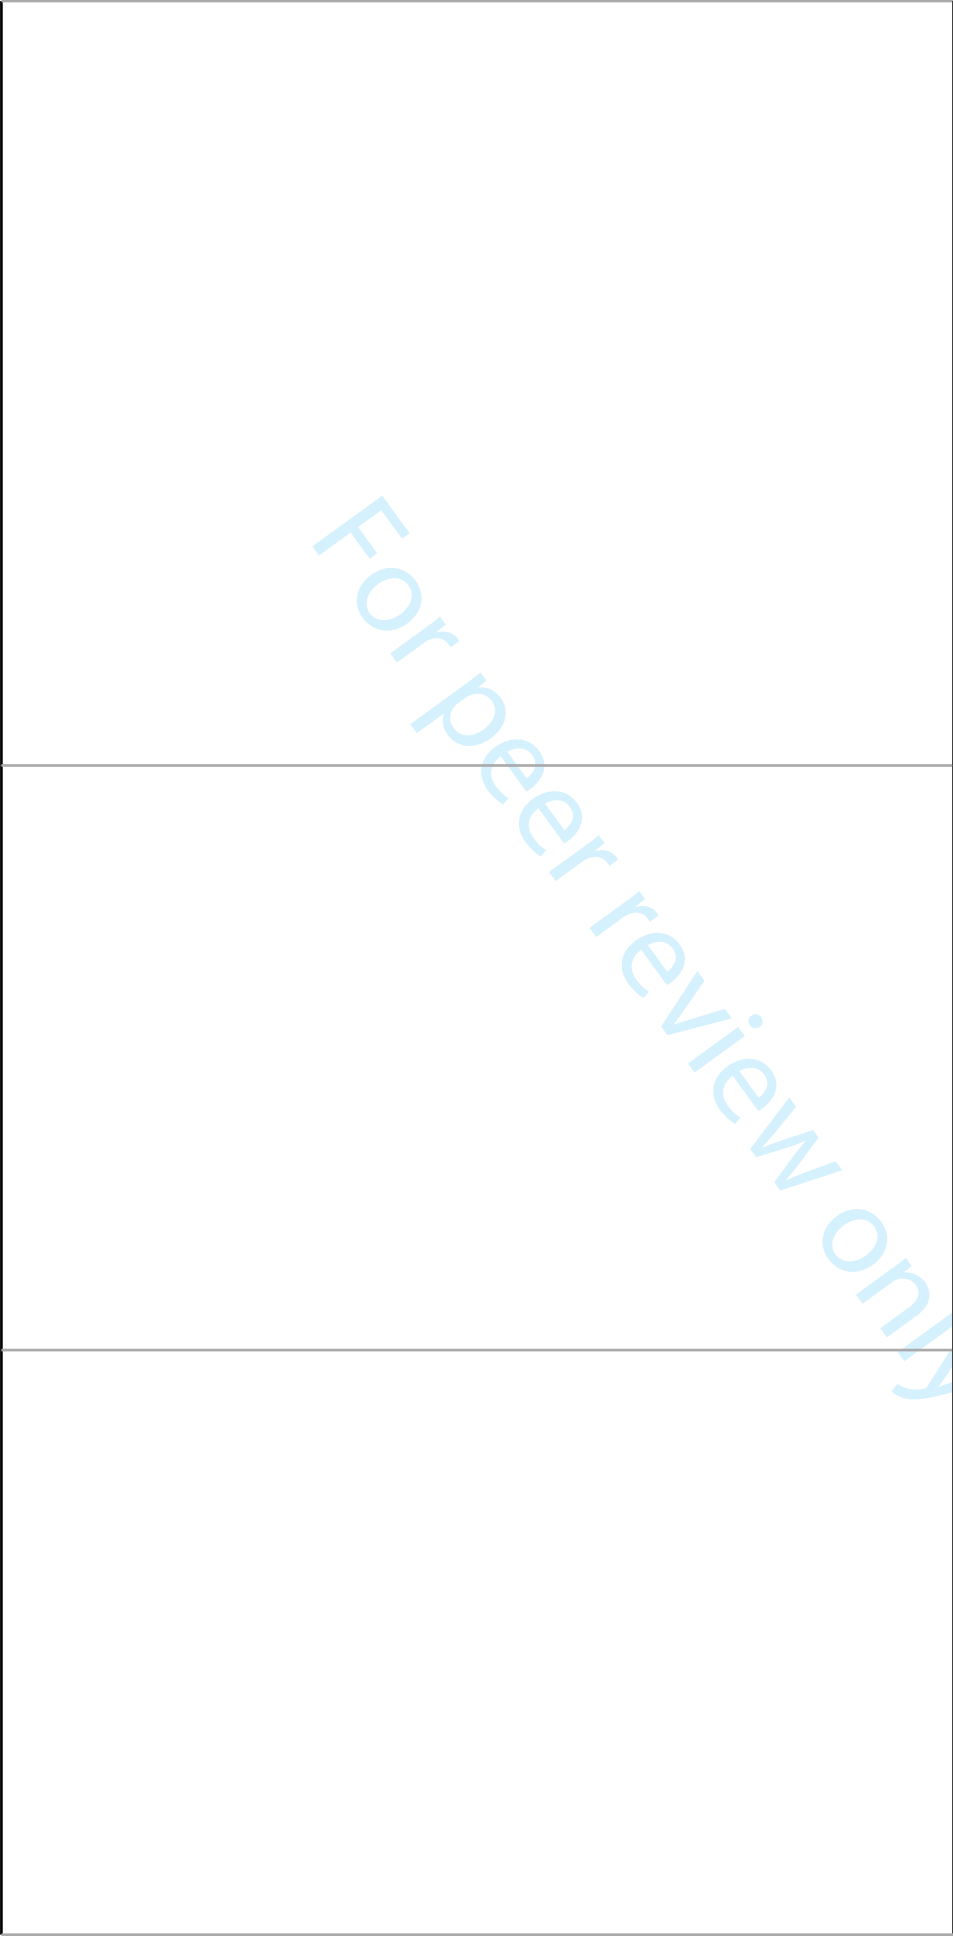



1  
2  
3  
4  
5  
6  
7  
8  
9  
10  
11  
12  
13  
14  
15  
16  
17  
18  
19  
20  
21  
22  
23  
24  
25  
26  
27  
28  
29  
30  
31  
32  
33  
34  
35  
36  
37  
38  
39  
40  
41  
42  
43  
44  
45  
46  
47  
48  
49  
50  
51  
52  
53  
54  
55  
56  
57  
58  
59  
60

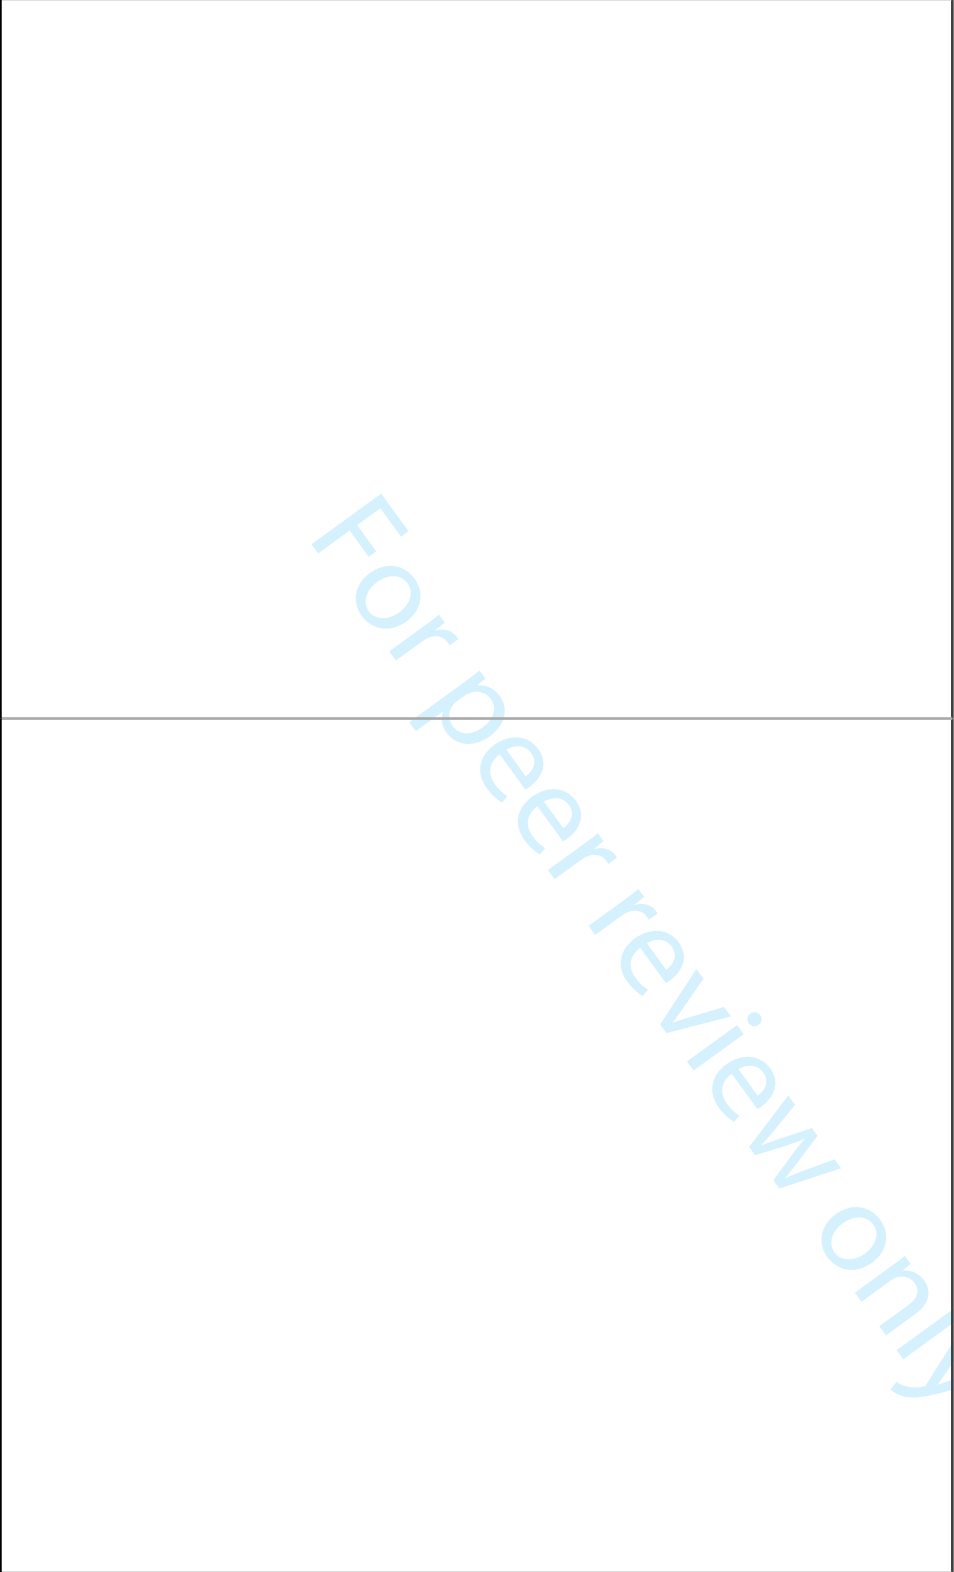

1  
2  
3  
4  
5  
6  
7  
8  
9  
10  
11  
12  
13  
14  
15  
16  
17  
18  
19  
20  
21  
22  
23  
24  
25  
26  
27  
28  
29  
30  
31  
32  
33  
34  
35  
36  
37  
38  
39  
40  
41  
42  
43  
44  
45  
46  
47  
48  
49  
50  
51  
52  
53  
54  
55  
56  
57  
58  
59  
60

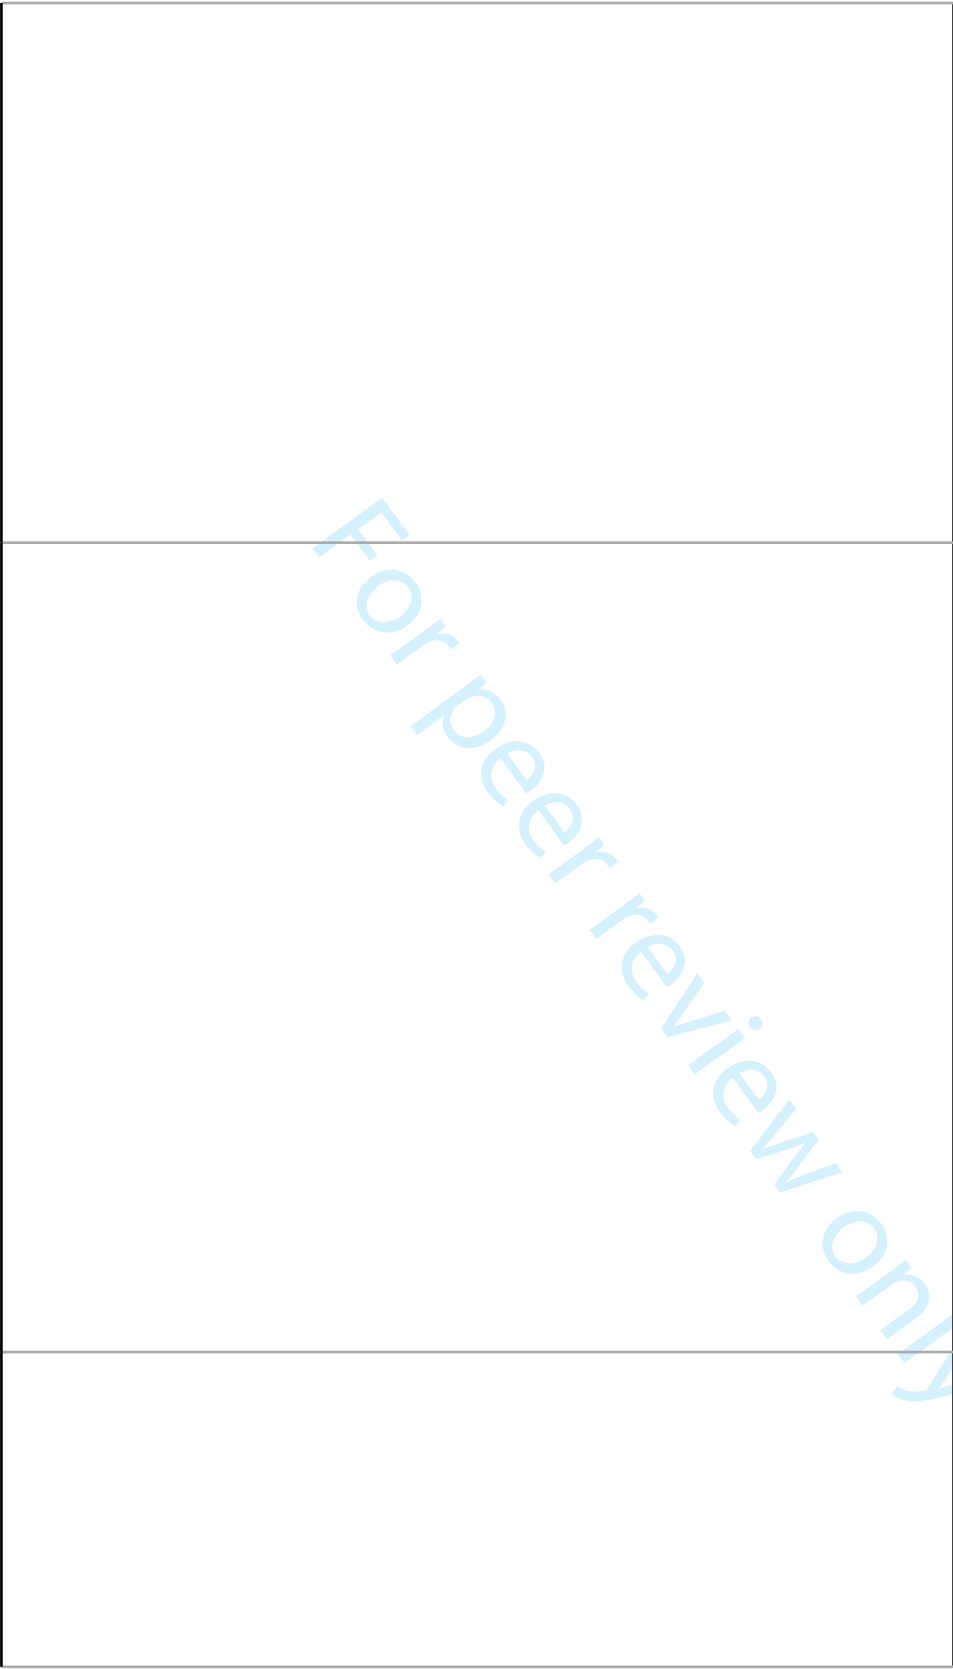

1  
2  
3  
4  
5  
6  
7  
8  
9  
10  
11  
12  
13  
14  
15  
16  
17  
18  
19  
20  
21  
22  
23  
24  
25  
26  
27  
28  
29  
30  
31  
32  
33  
34  
35  
36  
37  
38  
39  
40  
41  
42  
43  
44  
45  
46  
47  
48  
49  
50  
51  
52  
53  
54  
55  
56  
57  
58  
59  
60

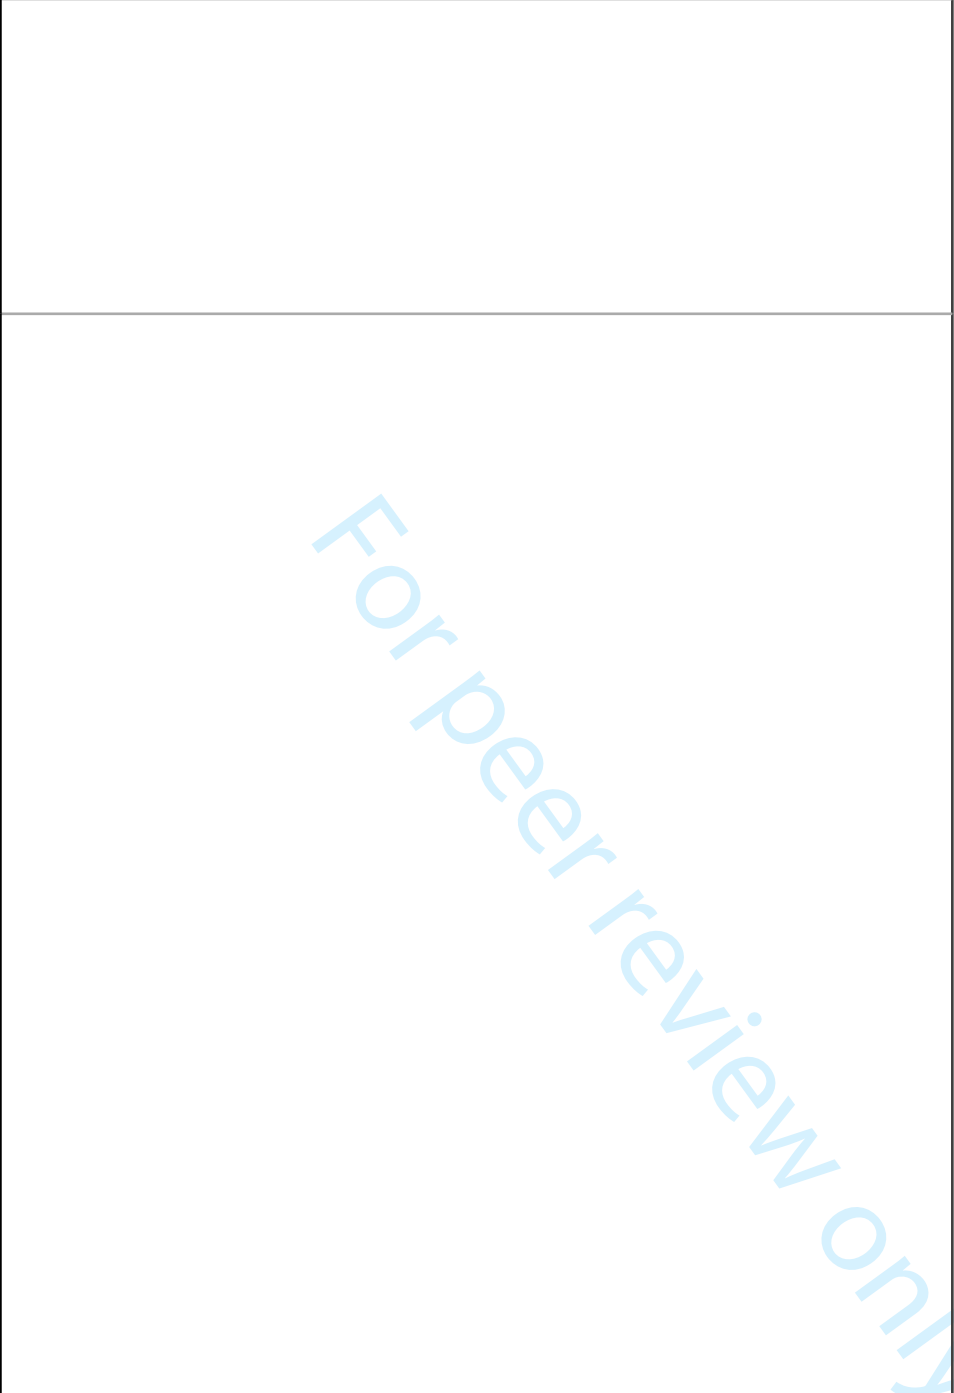

1  
2  
3  
4  
5  
6  
7  
8  
9  
10  
11  
12  
13  
14  
15  
16  
17  
18  
19  
20  
21  
22  
23  
24  
25  
26  
27  
28  
29  
30  
31  
32  
33  
34  
35  
36  
37  
38  
39  
40  
41  
42  
43  
44  
45  
46  
47  
48  
49  
50  
51  
52  
53  
54  
55  
56  
57  
58  
59  
60

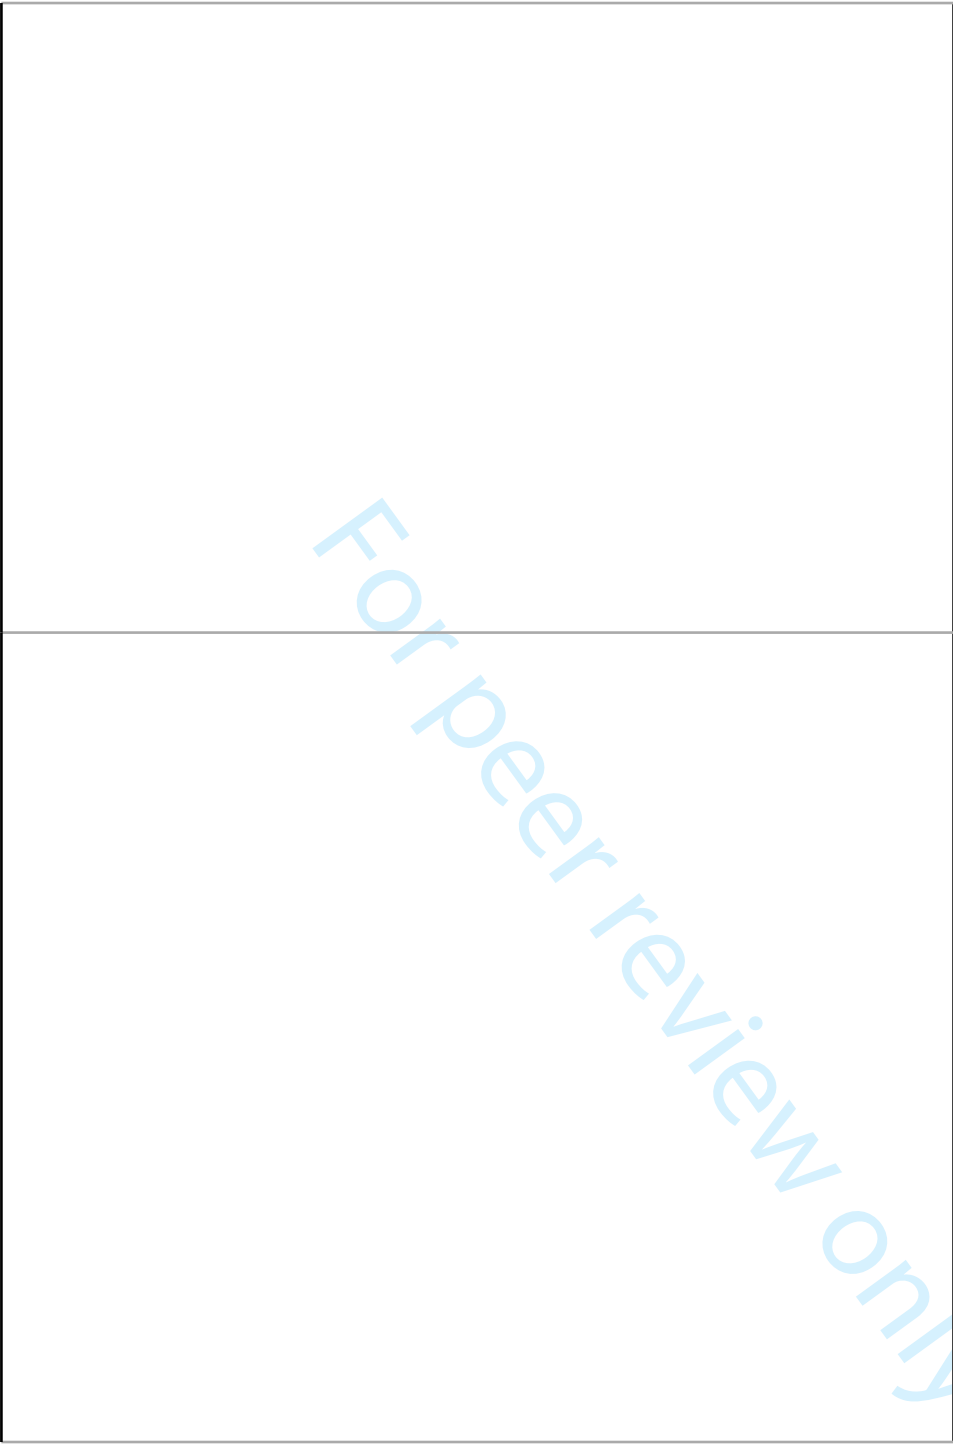

1  
2  
3  
4  
5  
6  
7  
8  
9  
10  
11  
12  
13  
14  
15  
16  
17  
18  
19  
20  
21  
22  
23  
24  
25  
26  
27  
28  
29  
30  
31  
32  
33  
34  
35  
36  
37  
38  
39  
40  
41  
42  
43  
44  
45  
46  
47  
48  
49  
50  
51  
52  
53  
54  
55  
56  
57  
58  
59  
60

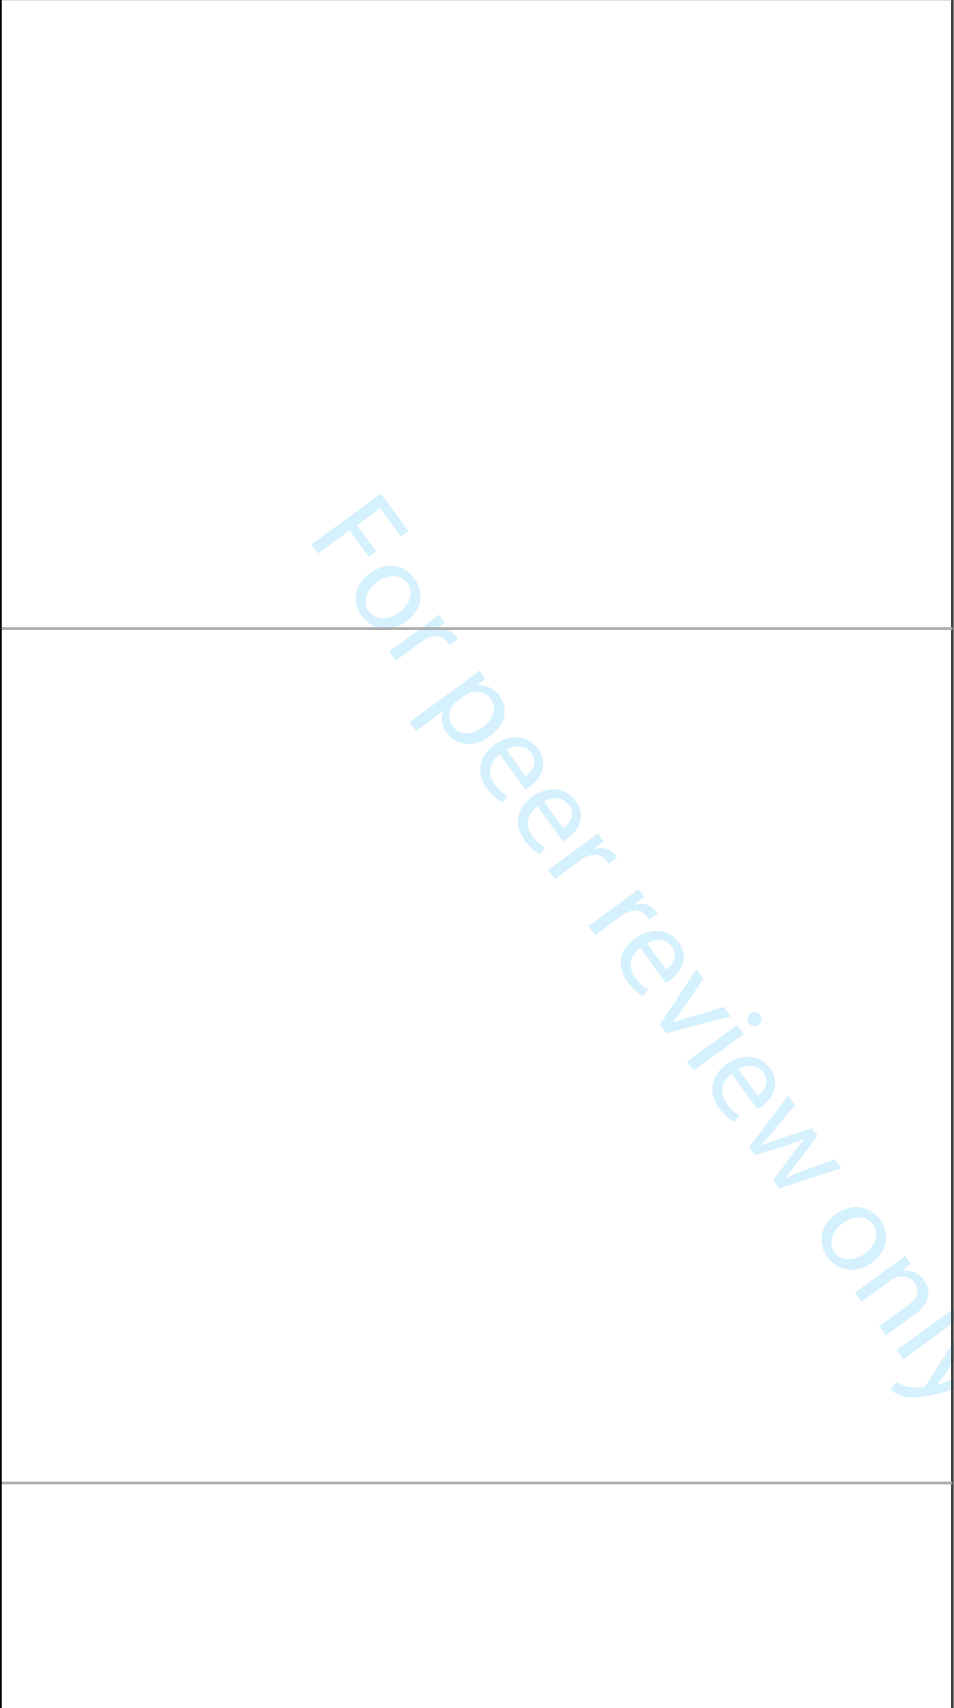

1  
2  
3  
4  
5  
6  
7  
8  
9  
10  
11  
12  
13  
14  
15  
16  
17  
18  
19  
20  
21  
22  
23  
24  
25  
26  
27  
28  
29  
30  
31  
32  
33  
34  
35  
36  
37  
38  
39  
40  
41  
42  
43  
44  
45  
46  
47  
48  
49  
50  
51  
52  
53  
54  
55  
56  
57  
58  
59  
60

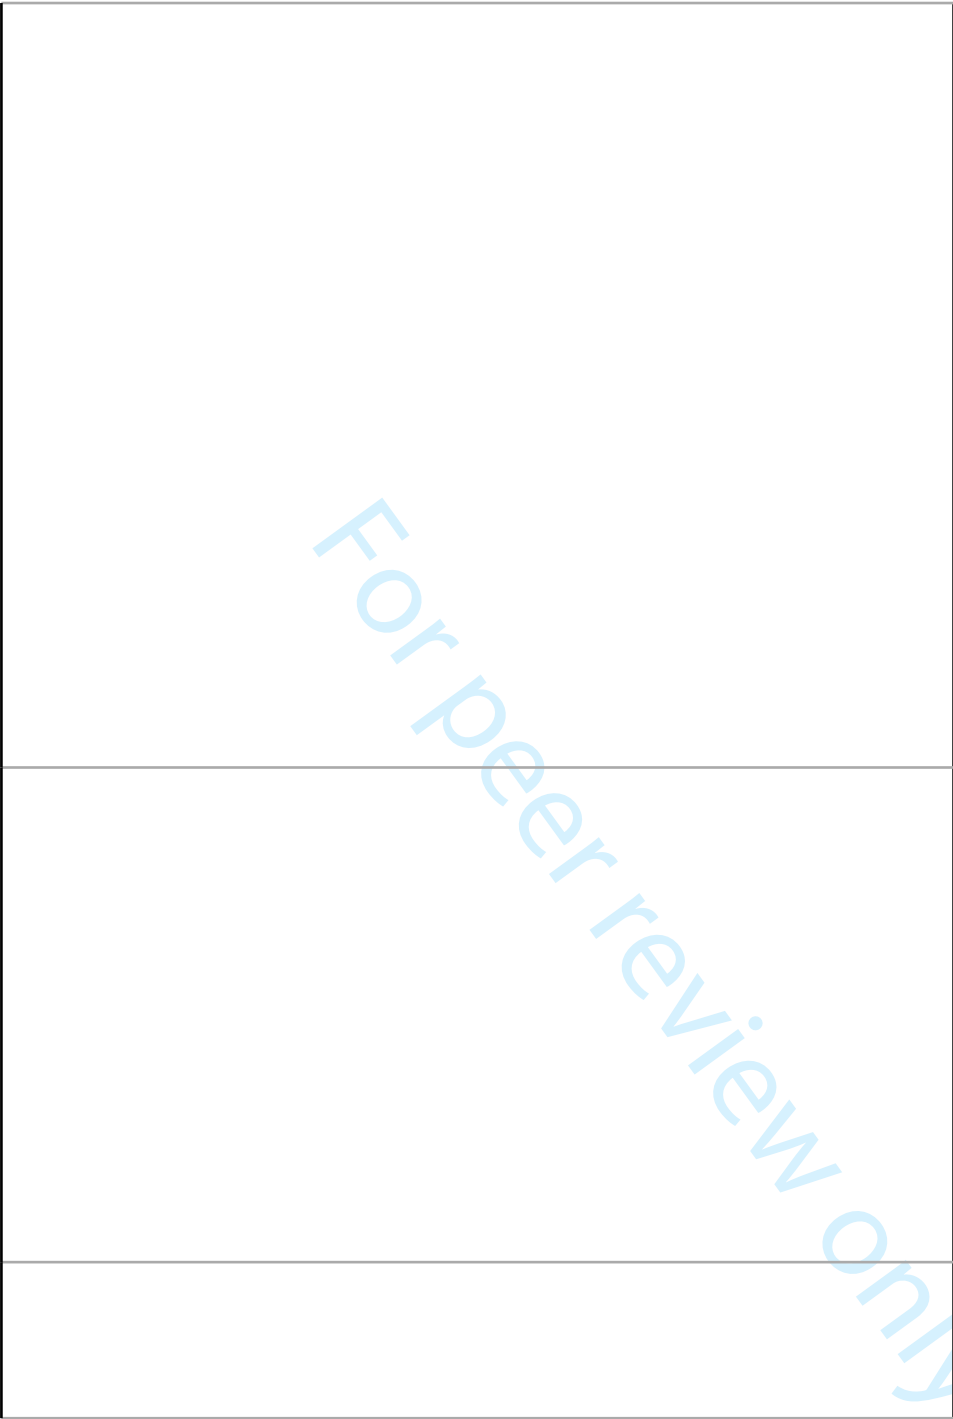

1  
2  
3  
4  
5  
6  
7  
8  
9  
10  
11  
12  
13  
14  
15  
16  
17  
18  
19  
20  
21  
22  
23  
24  
25  
26  
27  
28  
29  
30  
31  
32  
33  
34  
35  
36  
37  
38  
39  
40  
41  
42  
43  
44  
45  
46  
47  
48  
49  
50  
51  
52  
53  
54  
55  
56  
57  
58  
59  
60

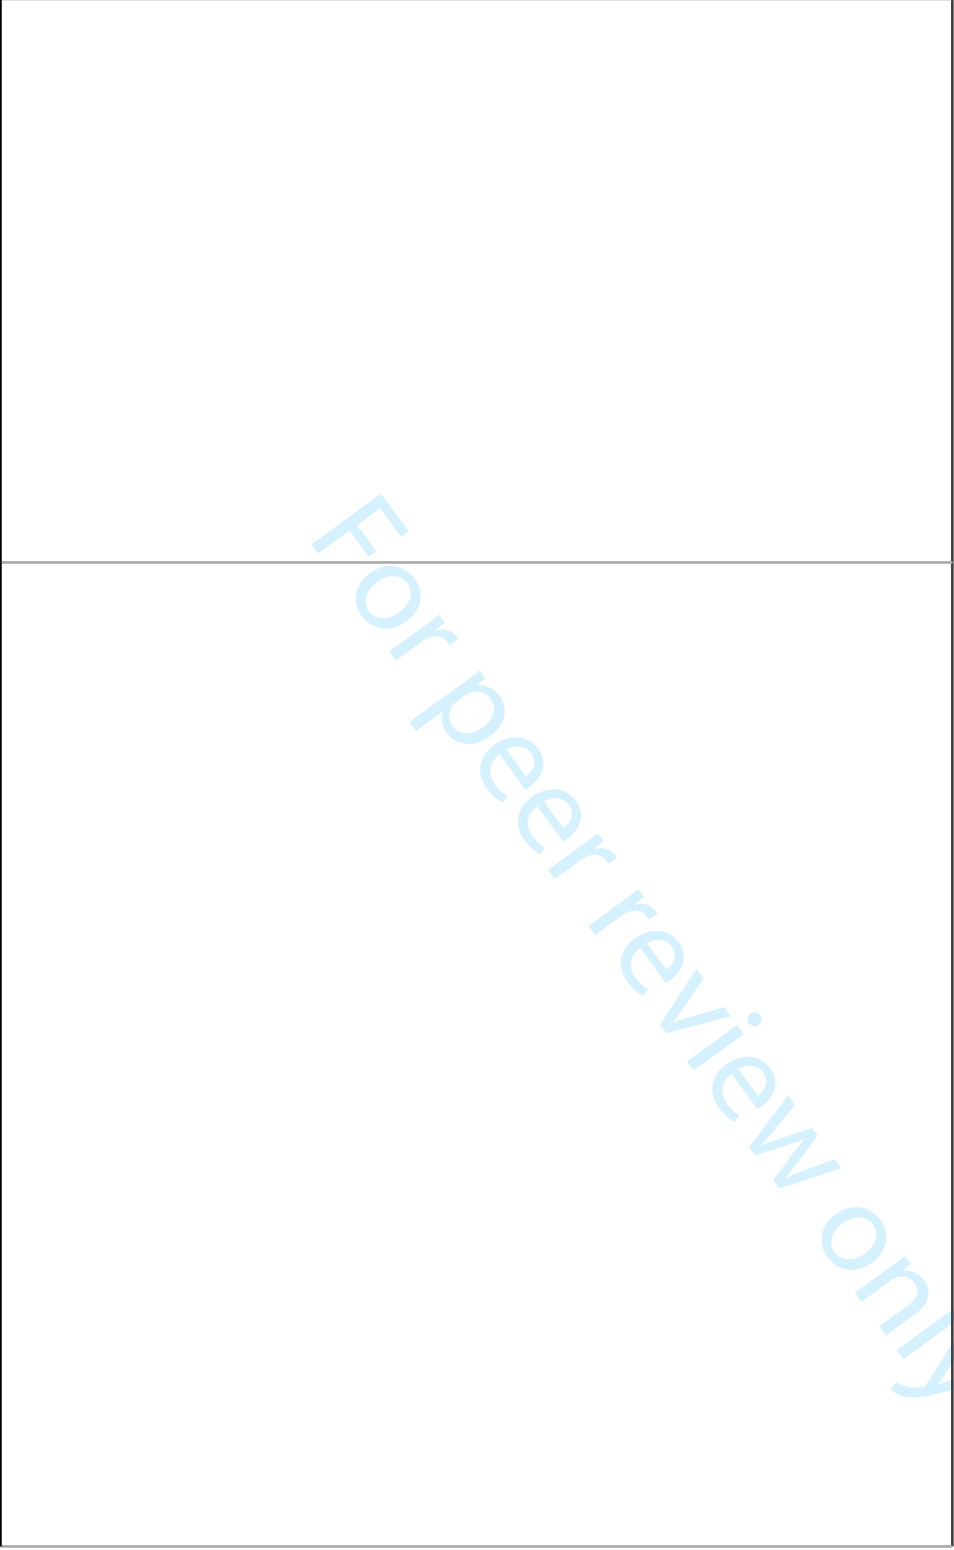

1  
2  
3  
4  
5  
6  
7  
8  
9  
10  
11  
12  
13  
14  
15  
16  
17  
18  
19  
20  
21  
22  
23  
24  
25  
26  
27  
28  
29  
30  
31  
32  
33  
34  
35  
36  
37  
38  
39  
40  
41  
42  
43  
44  
45  
46  
47  
48  
49  
50  
51  
52  
53  
54  
55  
56  
57  
58  
59  
60

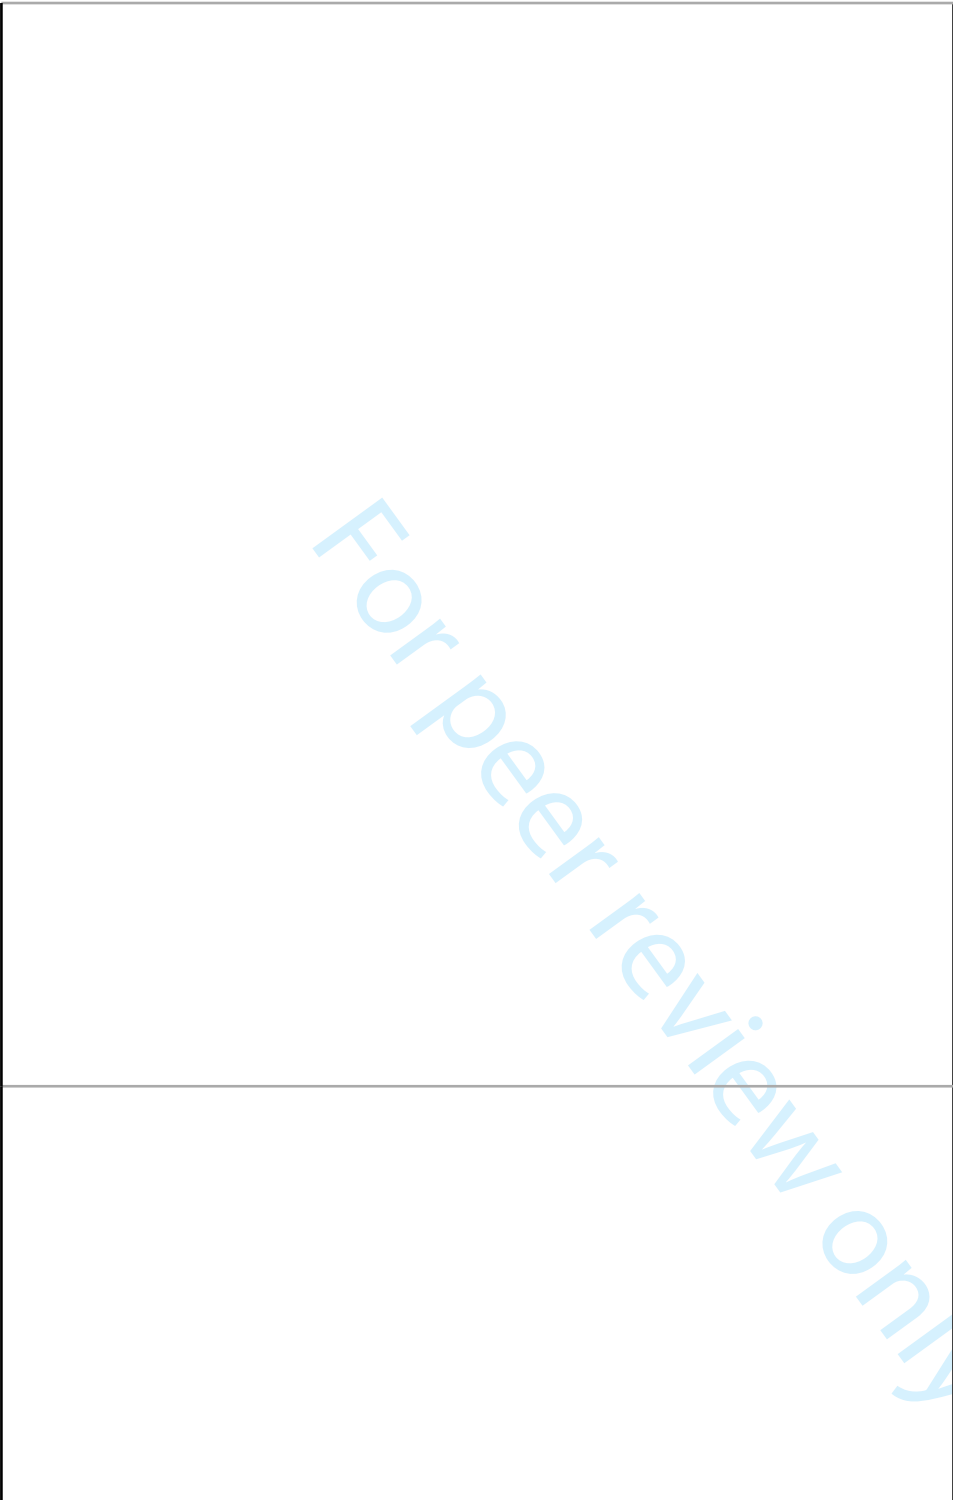



1  
2  
3  
4  
5  
6  
7  
8  
9  
10  
11  
12  
13  
14  
15  
16  
17  
18  
19  
20  
21  
22  
23  
24  
25  
26  
27  
28  
29  
30  
31  
32  
33  
34  
35  
36  
37  
38  
39  
40  
41  
42  
43  
44  
45  
46  
47  
48  
49  
50  
51  
52  
53  
54  
55  
56  
57  
58  
59  
60

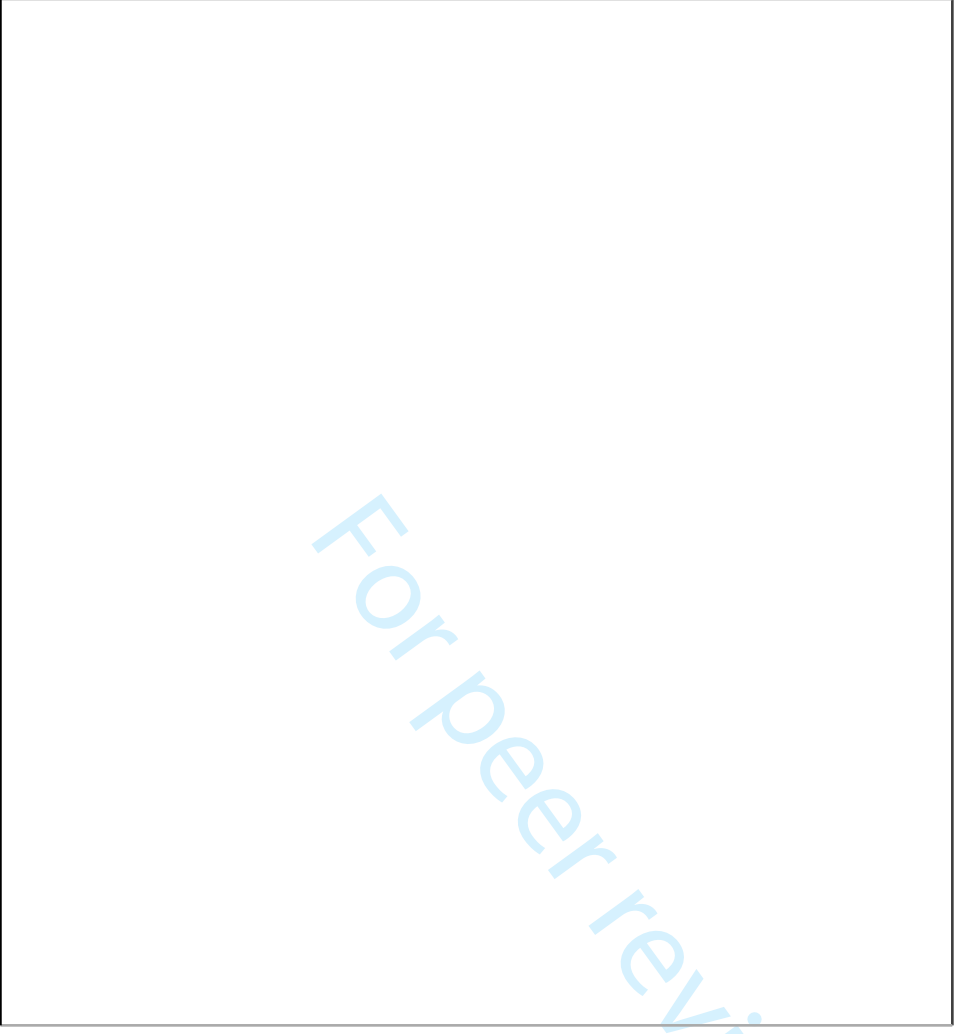

For peer review only

1  
2  
3  
4  
5  
6  
7  
8  
9  
10  
11  
12  
13  
14  
15  
16  
17  
18  
19  
20  
21  
22  
23  
24  
25  
26  
27  
28  
29  
30  
31  
32  
33  
34  
35  
36  
37  
38  
39  
40  
41  
42  
43  
44  
45  
46  
47  
48  
49  
50  
51  
52  
53  
54  
55  
56  
57  
58  
59  
60

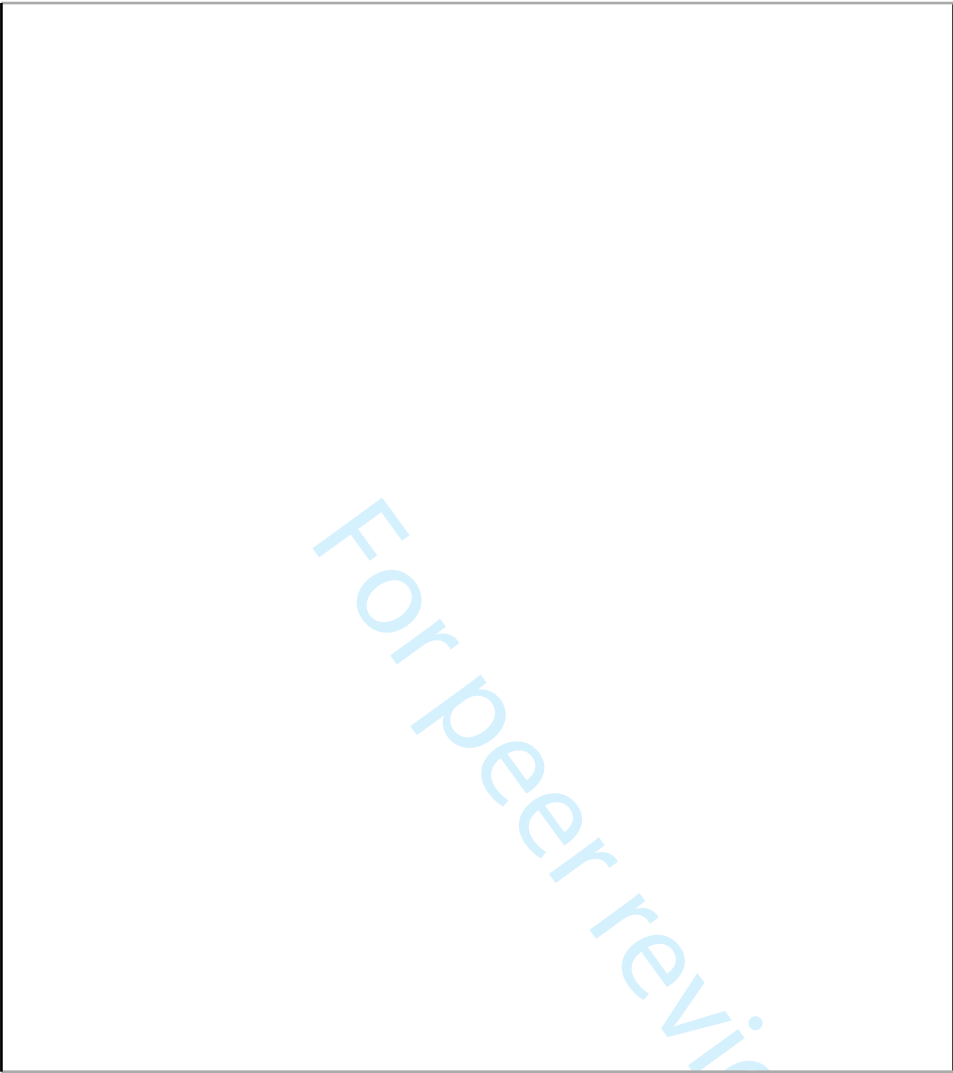

For peer review only

1  
2  
3  
4  
5  
6  
7  
8  
9  
10  
11  
12  
13  
14  
15  
16  
17  
18  
19  
20  
21  
22  
23  
24  
25  
26  
27  
28  
29  
30  
31  
32  
33  
34  
35  
36  
37  
38  
39  
40  
41  
42  
43  
44  
45  
46  
47  
48  
49  
50  
51  
52  
53  
54  
55  
56  
57  
58  
59  
60

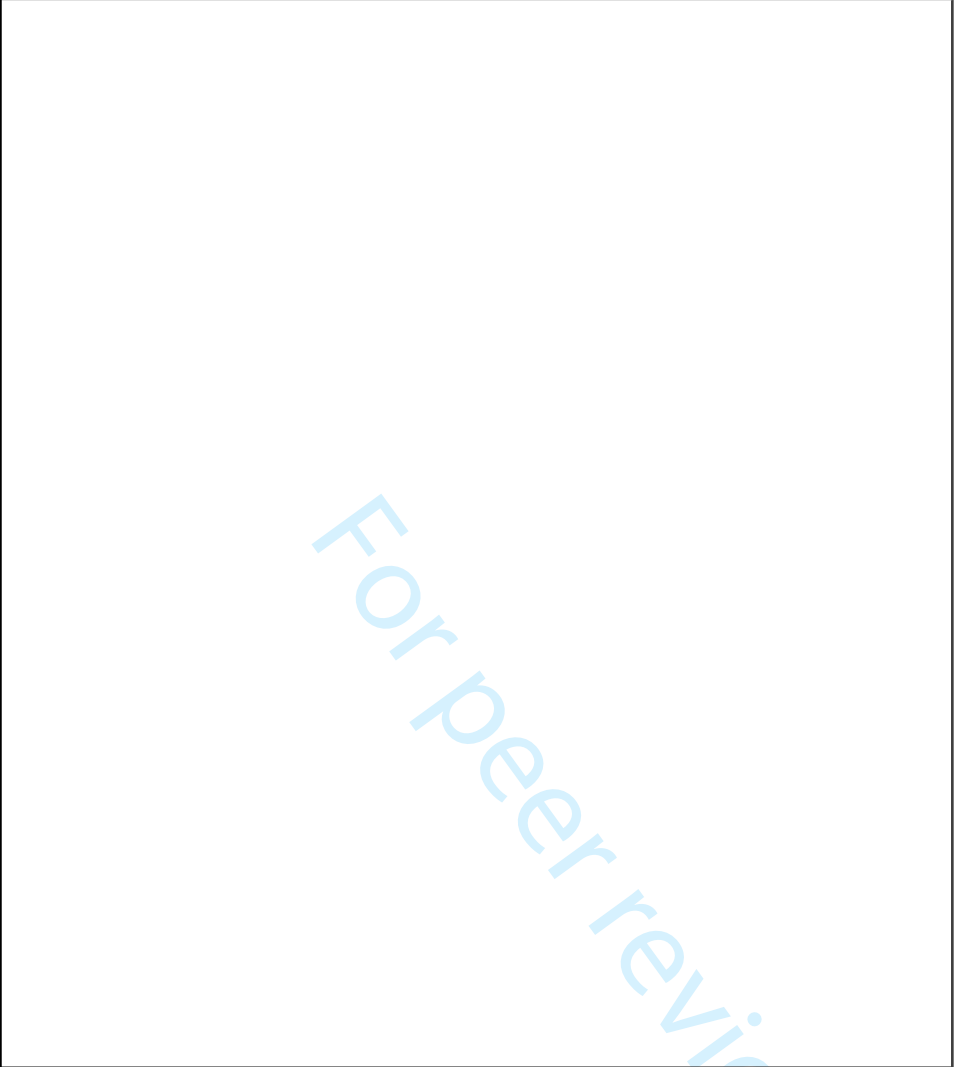

For peer review only

## Appendix 1: List of studies included in the scoping review

*See attached dataset for articles obtained from grey literature.*

1. The nurse's responsibility to the patient requesting assisted suicide. *Oncologic Nursing Society. Oncol Nurs Forum.* 2001 Apr;28(3):442.
2. Baron CH, Bergstresser C, Brock DW, Cole GF, Dorfman NS, Johnson JA, et al. A model state act to authorize and regulate physician-assisted suicide. *Harvard J Legis.* 1996;33(1):1–34.
3. Boissinot L, Benamou M, Légliise P, Mancret R-C, Huchon-Bécel D. [Euthanasia and / or medically assisted suicide: Reflection on the new responsibility of the hospital pharmacist]. *Ann Pharm Françaises [Internet].* 2014;72(2):82–9. Available from: <http://www.sciencedirect.com/science/article/pii/S0003450913001582>
4. Burette P, Bouüaert C, Vanmeerbeek M, Giet D. Quatre ans d'application de la loi de dépenalisation de l'euthanasie en Belgique. *Press Medicale [Internet].* 2008;37(9):1281–8. Available from: <http://www.sciencedirect.com/science/article/pii/S0755498208000778>
5. Chambaere K, Vander Stichele R, Mortier F, Cohen J, Deliens L. Recent trends in euthanasia and other end-of-life practices in Belgium. *N Engl J Med.* 2015; 372: 1179–81.
6. Chin AE, Hedberg K, Higginson GK, Fleming DW. Legalized physician-assisted suicide in Oregon--the first year's experience. *N Engl J Med.* 1999 Feb;340(7):577–83.
7. de Boer A, Sang Lau H, Porsius A. Physician-assisted death and pharmacy practice in the Netherlands. *N Engl J Med.* 1997 Oct; 337(15):1091–2.
8. Detry O, Laureys S, Faymonville M-E, De Roover A, Squifflet J-P, Lamy M, et al. Organ donation after physician-assisted death. *Transpl Int.* 2008 Sep; 21(9):915.
9. Dierckx de Casterle B, Denier Y, De Bal N, Gastmans C. Nursing care for patients requesting euthanasia in general hospitals in Flanders, Belgium. *J Adv Nurs.* 2010 Nov; 66(11): 2410–20.
10. Enck RE. Physician-assisted dying. *The American Journal of Hospice & Palliative Care.* 2010; 27(7): 441–3.
11. Groenewoud JH, van der Heide A, Onwuteaka-Philipsen BD, Willems DL, van der Maas PJ, van der Wal G. Clinical problems with the performance of euthanasia and physician-assisted suicide in The Netherlands. *N Engl J Med.* 2000 Feb; 342(8): 551–6.
12. Hopkins D, Boss M. Pharmacists' Right to Refuse to Dispense Prescriptions Based on Moral Grounds: A Summary of State Laws and Regulations. *Hosp Pharm [Internet].* 2006 Dec 1;41(12): 1176–9. Available from: <https://doi.org/10.1310/hpj4112-1176>

13. Lewis P. Euthanasia in Belgium five years after legalisation. *Eur J Health Law*. 2009 Jun;16(2):125–38.
14. Loggers ET, Starks H, Shannon-Dudley M, Back AL, Appelbaum FR, Stewart FM. Implementing a Death with Dignity program at a comprehensive cancer center. *N Engl J Med*. 2013 Apr;368(15):1417–24.
15. Meek C. Pharmacy involvement where assisted suicide and euthanasia are permitted. *Pharm J*. 2006;277:614.
16. Meier DE, Emmons CA, Wallenstein S, Quill T, Morrison RS, Cassel CK. A national survey of physician-assisted suicide and euthanasia in the United States. *N Engl J Med*. 1998 Apr;338(17):1193–201.
17. Ogden R. The right to die: a policy proposal for euthanasia and aid in dying. *Can Public Policy*. 1994 Mar;20(1):1–25.
18. Pereira J, Laurent P, Cantin B, Petremand D, Currat T. The response of a Swiss university hospital's palliative care consult team to assisted suicide within the institution. *Palliat Med*. 2008 Jul;22(5):659–67.
19. Rurup ML, Onwuteaka-Philipsen BD, Heide A va. der, Wal G va. der, Maas PJ va. der. [Trends in means used in euthanasia and coherence with it number of notifications]. *Dutch J Med*. 2006;18(150):11.
20. Smith KA, Goy ER, Harvath TA, Ganzini L. Quality of death and dying in patients who request physician-assisted death. *Palliat Med*. 2011 Apr;14(4):445–50.
21. van der Arend AJ. Euthanasia and assisted suicide in The Netherlands: clarifying the practice and the nurse's role. *Int Nurs Rev*. 1998;45(5):145–51.
22. Vander Stichele RH, Bilsen JJR, Bernheim JL, Mortier F, Deliens L. Drugs used for euthanasia in Flanders, Belgium. *Pharmacoepidemiol Drug Saf*. 2004 Feb;13(2):89–95.
23. Werth JLJ, Wineberg H. A critical analysis of criticisms of the Oregon Death with Dignity Act. *Death Stud*. 2005;29(1):1–27.
24. Final report of the Netherlands State Commission on Euthanasia: an English summary. *Bioethics*. 1987 Apr;1(2):163–74.
25. Asch DA. The role of critical care nurses in euthanasia and assisted suicide. *N Engl J Med*. 1996 May;334(21):1374–9.
26. Benrubi GI. Euthanasia--the need for procedural safeguards. *N Engl J Med*. 1992 Jan;326(3):197–9.

- 1
  - 2
  - 3
  - 4
  - 5
  - 6
  - 7
  - 8
  - 9
  - 10
  - 11
  - 12
  - 13
  - 14
  - 15
  - 16
  - 17
  - 18
  - 19
  - 20
  - 21
  - 22
  - 23
  - 24
  - 25
  - 26
  - 27
  - 28
  - 29
  - 30
  - 31
  - 32
  - 33
  - 34
  - 35
  - 36
  - 37
  - 38
  - 39
  - 40
  - 41
  - 42
  - 43
  - 44
  - 45
  - 46
  - 47
  - 48
  - 49
  - 50
  - 51
  - 52
  - 53
  - 54
  - 55
  - 56
  - 57
  - 58
  - 59
  - 60
27. Bilsen JJR, Vander Stichele RH, Mortier F, Deliens L. Involvement of nurses in physician-assisted dying. *J Adv Nurs*. 2004 Sep;47(6):583–91.
28. Bosshard G, Fischer S, Bar W. Open regulation and practice in assisted dying. *Swiss Med Wkly*. 2002 Oct;132(37–38):527–34.
29. Bosshard G, Ulrich E, Bar W. 748 cases of suicide assisted by a Swiss right-to-die organisation. *Swiss Med Wkly*. 2003 May;133(21–22):310–7.
30. Chabot BE, Goedhart A. A survey of self-directed dying attended by proxies in the Dutch population. *Soc Sci Med*. 2009 May;68(10):1745–51.
31. De Beer T, Gastmans C, Dierckx de Casterle B. Involvement of nurses in euthanasia: a review of the literature. *J Med Ethics*. 2004 Oct;30(5):494–8.
32. Emanuel EJ, Daniels ER, Fairclough DL, Clarridge BR. The practice of euthanasia and physician-assisted suicide in the United States: adherence to proposed safeguards and effects on physicians. *JAMA*. 1998 Aug;280(6):507–13.
33. Ganzini L, Goy ER, Dobscha SK, Prigerson H. Mental health outcomes of family members of Oregonians who request physician aid in dying. *J Pain Symptom Manage*. 2009 Dec;38(6):807–15.
34. Hall JK. Assisted suicide: nurse practitioners as providers? *Nurse Pract*. 1996 Oct;21(10):63-66,71.
35. Hedberg K, Hopkins D, Kohn M. Five years of legal physician-assisted suicide in Oregon. Vol. 348, *The New England journal of medicine*. United States; 2003. p. 961–4.
36. Hedberg K, Hopkins D, Southwick K. Legalized physician-assisted suicide in Oregon, 2001. Vol. 346, *The New England journal of medicine*. United States; 2002. p. 450–2.
37. Inghelbrecht E, Bilsen J, Mortier F, Deliens L. The role of nurses in physician-assisted deaths in Belgium. *CMAJ*. 2010 Jun;182(9):905–10.
38. Lossignol D, Libert I, Michel B, Dumitrescu C, Obiols M, Rosseau C. End of life decision, euthanasia, in a belgian supportive care unit. Abstracts of the 2011 International MASCC/ISOO (Multinational Association of Supportive Care in Cancer/International Society for Oral Oncology) Symposium. June 23-25, 2011. Athens, Greec. *Supportive Care in Cancer*. 2011. 19 (Suppl 2):S67-370.

- 1
- 2
- 3 39. Matzo ML, Emanuel EJ. Oncology nurses' practices of assisted suicide and patient-
- 4 requested euthanasia. *Oncol Nurs Forum*. 1997;24(10):1725–32.
- 5
- 6 40. Meier DE, Emmons C-A, Litke A, Wallenstein S, Morrison RS. Characteristics of patients
- 7 requesting and receiving physician-assisted death. *Arch Intern Med*. 2003
- 8 Jul;163(13):1537–42.
- 9
- 10 41. Naafs NJ. Pharmaceutical care until the end: the role of pharmacists in euthanasia in The
- 11 Netherlands. *Pharm World Sci*. 2001 Aug;23(4):129–31.
- 12
- 13 42. O'Brien CN, Madek GA, Ferrera GR. Oregon's guidelines for physician-assisted suicide:
- 14 a legal and ethical analysis. *Univ Pittsbg Law Rev*. 2000;61(2):329–65.
- 15
- 16 43. Onwuteaka-Philipsen BD, Muller MT, van der Wal G. Euthanatics: implementation of a
- 17 protocol to standardise euthanatics among pharmacists and GPs. *Patient Educ Couns*.
- 18 1997 Jun;31(2):131–7.
- 19
- 20 44. Onwuteaka-Philipsen BD, Muller MT, van der Wal G, van Eijk JT, Ribbe MW. Active
- 21 voluntary euthanasia or physician-assisted suicide? *J Am Geriatr Soc*. 1997
- 22 Oct;45(10):1208–13.
- 23
- 24 45. Onwuteaka-Philipsen BD, Muller MT, van der Wal G, van Eijk JT, Ribbe MW. Attitudes
- 25 of Dutch general practitioners and nursing home physicians to active voluntary euthanasia
- 26 and physician-assisted suicide. *Arch Fam Med*. 1995 Nov;4(11):951–5.
- 27
- 28 46. Onwuteaka-Philipsen BD, van der Wal G. Cases of euthanasia and physician assisted
- 29 suicide among AIDS patients reported to the Public Prosecutor in North Holland. *Public*
- 30 *Health*. 1998 Jan;112(1):53–6.
- 31
- 32 47. Rurup ML, Smets T, Cohen J, Bilsen J, Onwuteaka-Philipsen BD, Deliens L. The first
- 33 five years of euthanasia legislation in Belgium and the Netherlands: description and
- 34 comparison of cases. *Palliat Med*. 2012 Jan;26(1):43–9.
- 35
- 36 48. Spencer DE. Practical implications for health care providers in a physician-assisted
- 37 suicide environment. *Seattle Univ law Rev*. 1995;18(3):545–56.
- 38
- 39 49. Swarte NB, Heintz AP. Euthanasia and physician-assisted suicide. *Ann Med*. 1999
- 40 Dec;31(6):364–71.
- 41
- 42 50. Swarte NB, Heintz AP. Guidelines for an acceptable euthanasia procedure. *Best Pract Res*
- 43 *Clin Obstet Gynaecol*. 2001 Apr;15(2):313–21.
- 44
- 45 51. van Bruchem-van de Scheur GG, van der Arend AJG, Spreuwenberg C, Abu-Saad HH,
- 46 ter Meulen RHJ. Euthanasia and physician-assisted suicide in the Dutch homecare sector:
- 47 the role of the district nurse. *J Adv Nurs*. 2007 Apr;58(1):44–52.
- 48
- 49
- 50
- 51
- 52
- 53
- 54
- 55
- 56
- 57
- 58
- 59
- 60

- 1  
2  
3 52. van de Scheur A, van der Arend A. The role of nurses in euthanasia: a Dutch study. *Nurs Ethics*. 1998 Nov;5(6):497–508.  
4  
5  
6  
7 53. van der Kloot Meijburg HH. How health care institutions in the Netherlands approach  
8 physician assisted death. *Omega*. 32(3):179–96.  
9  
10 54. van der Maas PJ, van der Wal G, Haverkate I, de Graaff CL, Kester JG, Onwuteaka-  
11 Philipsen BD, et al. Euthanasia, physician-assisted suicide, and other medical practices  
12 involving the end of life in the Netherlands, 1990-1995. *N Engl J Med*. 1996  
13 Nov;335(22):1699–705.  
14  
15  
16 55. van der Wal G, van Eijk JT, Leenen HJ, Spreeuwenberg C. [The use of drugs for  
17 euthanasia and assisted suicide in family practice]. *Ned Tijdschr Geneesk*. 1992  
18 Jul;136(27):1299–305.  
19  
20 56. Varadarajan R, Freeman RA, Parmar JR. Aid-in-dying practice in Europe and the United  
21 States: Legal and ethical perspectives for pharmacy. *Res Social Adm Pharm*. 2016  
22 Nov;12(6):1016–25.  
23  
24  
25 57. Willems DL, Groenewoud JH, van der Wal G. Drugs used in physician-assisted death.  
26 *Drugs Aging*. 1999 Nov;15(5):335–40.  
27  
28  
29 58. Bollen J, de Jongh W, Hagens J, van Dijk G, Ten Hoopen R, Ysebaert D, et al. Organ  
30 Donation After Euthanasia: A Dutch Practical Manual. *Am J Transplant*. 2016  
31 Jul;16(7):1967–72.  
32  
33 59. Bilsen J, Bauwens M, Bernheim J, Stichele R Vander, Deliens L. Physician-assisted  
34 death: attitudes and practices of community pharmacists in East Flanders, Belgium. *Palliat*  
35 *Med*. 2005 Mar;19(2):151–7.  
36  
37  
38 60. Blanke C, LeBlanc M, Hershman D, Ellis L, Meyskens F. Characterizing 18 Years of the  
39 Death With Dignity Act in Oregon. *JAMA Oncol*. 2017 Oct;3(10):1403–6.  
40  
41 61. Boissinot L, Benamou M, Leglise P, Mancret R-C, Huchon-Becel D. [Euthanasia and/or  
42 medically assisted suicide: Reflection on the new responsibility of the hospital  
43 pharmacist]. *Ann Pharm Fr*. 2014 Mar;72(2):82–9.  
44  
45  
46 62. Bosshard G. [Assisted suicide - medical, legal, and ethical aspects]. *Praxis (Bern 1994)*.  
47 2012 Feb;101(3):183–9.  
48  
49 63. Bosshard G, Zellweger U, Bopp M, Schmid M, Hurst SA, Puhon MA, et al. Medical End-  
50 of-Life Practices in Switzerland: A Comparison of 2001 and 2013. *JAMA Intern Med*.  
51 2016 Apr;176(4):555–6.  
52  
53  
54  
55  
56  
57  
58  
59  
60



- 1  
2  
3 64. Campbell CS, Cox JC. Hospice-assisted death? A study of Oregon hospices on death with  
4 dignity. *Am J Hosp Palliat Care*. 2012 May;29(3):227–35.  
5  
6 65. Chambaere K, Bilsen J, Cohen J, Onwuteaka-Philipsen BD, Mortier F, Deliens L.  
7 Physician-assisted deaths under the euthanasia law in Belgium: a population-based survey.  
8 *CMAJ*. 2010 Jun;182(9):895–901.  
9  
10 66. Cohen-Almagor R, Hartman MG. The Oregon Death with Dignity Act: review and  
11 proposals for improvement. *J Legis*. 2001;27(2):269–98.  
12  
13 67. Crouch BI. Toxicological Issues with Drugs Used to End Life. *J Pharm Care Pain*  
14 *Symptom Control* [Internet]. 1996 Jan 1;4(1–2):211–22. Available from:  
15 [https://doi.org/10.1300/J088v04n01-2\\_04](https://doi.org/10.1300/J088v04n01-2_04)  
16  
17 68. Dunn P, Reagan B, Tolle SW, Foreman S. The Oregon Death with Dignity Act: A  
18 Guidebook for Health Care Providers, edited by Kathleen Haley and Melinda Lee. The  
19 Task Force to Improve the Care of Terminally-Ill Oregonians. United States; 2008 Jul.  
20  
21 69. Emanuel EJ, Fairclough D, Clarridge BC, Blum D, Bruera E, Penley WC, et al. Attitudes  
22 and practices of U.S. oncologists regarding euthanasia and physician-assisted suicide. *Ann*  
23 *Intern Med*. 2000 Oct;133(7):527–32.  
24  
25 70. Emanuel EJ. Euthanasia and physician-assisted suicide: a review of the empirical data  
26 from the United States. *Arch Intern Med*. 2002 Jan;162(2):142–52.  
27  
28 71. Englert M. Depenalized practice of euthanasia in Belgium: evolution from 2002 to 2005  
29 and interpretation of differences between the North and South of the country. *Med J*  
30 *Brussels*. 2007;28:423–30.  
31  
32 72. Evrard P. Belgian Modified Classification of Maastricht for Donors After Circulatory  
33 Death on behalf of the Belgian Working Group on DCD National Protocol. In:  
34 *Transplantation Proceedings* [Internet]. Elsevier; 2014. p. 3138–42. Available from:  
35 [http://www.transplantation-proceedings.org/article/S0041-1345\(14\)01019-7/pdf](http://www.transplantation-proceedings.org/article/S0041-1345(14)01019-7/pdf)  
36  
37 73. Finlay IG, van Dijk B. Euthanasia: the Dutch experience and what it entails in practice.  
38 *Lancet Oncol*. 2002 Mar;3(3):135–6.  
39  
40 74. Fischer S, Huber CA, Imhof L, Mahrer Imhof R, Furter M, Ziegler SJ, et al. Suicide  
41 assisted by two Swiss right-to-die organisations. *J Med Ethics*. 2008 Nov;34(11):810–4.  
42  
43 75. 1. de Wachter MAM. Active Euthanasia in the Netherlands. *JAMA* [Internet]. 1989 Dec  
44 15;262(23):3316–9. Available from: <https://doi.org/10.1001/jama.1989.03430230101034>  
45  
46 76. Hiscox WE. Physician-Assisted Suicide in Oregon: The ‘Death with Dignity’ Data. *Med*  
47 *Law Int* [Internet]. 2007 Sep 1;8(3):197–220. Available from:  
48 <https://doi.org/10.1177/096853320700800301>  
49  
50  
51  
52  
53  
54  
55  
56  
57  
58  
59

- 1  
2  
3 77. Horikx A, Admiraal P V. [Utilization of euthanatic agents; experience of physicians with  
4 227 patients, 1998-2000]. *Ned Tijdschr Geneeskd.* 2000 Dec;144(52):2497–500.
- 5  
6  
7 78. Inghelbrecht E, Bilsen J, Mortier F, Deliens L. Factors related to the involvement of  
8 nurses in medical end-of-life decisions in Belgium: a death certificate study. *Int J Nurs*  
9 *Stud.* 2008 Jul;45(7):1022–31.
- 10  
11 79. Jamison S. When Drugs Fail: Assisted Deaths and Not-So-Lethal Drugs. *J Pharm Care*  
12 *Pain Symptom Control* [Internet]. 1996 Jan 1;4(1–2):223–43. Available from:  
13 [https://doi.org/10.1300/J088v04n01-2\\_05](https://doi.org/10.1300/J088v04n01-2_05)
- 14  
15 80. Kimsma GK. Euthanasia and Euthanizing Drugs in The Netherlands. *J Pharm Care Pain*  
16 *Symptom Control* [Internet]. 1996 Jan 1;4(1–2):193–210. Available from:  
17 [https://doi.org/10.1300/J088v04n01-2\\_03](https://doi.org/10.1300/J088v04n01-2_03)
- 18  
19 81. Kompanje EJO, de Beaufort ID, Bakker J. Euthanasia in intensive care: a 56-year-old man  
20 with a pontine hemorrhage resulting in a locked-in syndrome. *Crit Care Med.* 2007  
21 Oct;35(10):2428–30.
- 22  
23 82. Lalmohamed A, Horikx A. [Experience with euthanasia since 2007. Analysis of problems  
24 with execution]. Vol. 154, *Nederlands tijdschrift voor geneeskunde.* 2010. A1882 p.
- 25  
26 83. Lau HS, Riezebos J, Abas V, Porsius AJ, De Boer A. A nation-wide study on the practice  
27 of euthanasia and physician-assisted suicide in community and hospital pharmacies in The  
28 Netherlands. *Pharm World Sci.* 2000 Feb;22(1):3–9.
- 29  
30 84. Lemiengre J, Dierckx de Casterle B, Denier Y, Schotsmans P, Gastmans C. How do  
31 hospitals deal with euthanasia requests in Flanders (Belgium)? A content analysis of  
32 policy documents. *Patient Educ Couns.* 2008 May;71(2):293–301.
- 33  
34 85. Lossignol D. [Euthanasia: medications and medical procedures]. *Rev Med Brux.* 2008  
35 Sep;29(4):435–40.
- 36  
37 86. Oregon Nurses Association. Guidelines on the nurse's role related to the death with  
38 dignity act. 2001.
- 39  
40 87. Pasma HRW, Wolf JEH, Hesselink BAM, van der Heide A, van der Wal G, van der  
41 Maas PJ, et al. Policy statements and practice guidelines for medical end-of-life decisions  
42 in Dutch health care institutions: developments in the past decade. *Health Policy.* 2009  
43 Sep;92(1):79–88.
- 44  
45 88. Pennec S, Riou F, Gaymu J, Pontone S, Aubry R. Physician-assisted deaths in France:  
46 results from a nationwide survey. *Presse Med.* 2015;44(7–8):864–7.
- 47  
48  
49  
50  
51  
52  
53  
54  
55  
56  
57  
58  
59  
60

- 1  
2  
3 89. Rietjens JAC, van Delden JJM, van der Heide A, Vrakking AM, Onwuteaka-Philipsen  
4 BD, van der Maas PJ, et al. Terminal sedation and euthanasia: a comparison of clinical  
5 practices. *Arch Intern Med*. 2006 Apr;166(7):749–53.  
6
- 7  
8 90. Rietjens JAC, van der Maas PJ, Onwuteaka-Philipsen BD, van Delden JJM, van der Heide  
9 A. Two Decades of Research on Euthanasia from the Netherlands. What Have We Learnt  
10 and What Questions Remain? *J Bioeth Inq*. 2009 Sep;6(3):271–83.  
11
- 12 91. Schildmann J, Hoetzel J, Mueller-Busch C, Vollmann J. End-of-life practices in palliative  
13 care: a cross sectional survey of physician members of the German Society for Palliative  
14 Medicine. *Palliat Med*. 2010 Dec;24(8):820–7.  
15
- 16 92. Smets T, Bilsen J, Cohen J, Rurup ML, De Keyser E, Deliens L. The medical practice of  
17 euthanasia in Belgium and The Netherlands: legal notification, control and evaluation  
18 procedures. *Health Policy*. 2009 May;90(2–3):181–7.  
19
- 20 93. Smets T, Bilsen J, Cohen J, Rurup ML, Deliens L. Legal euthanasia in Belgium:  
21 characteristics of all reported euthanasia cases. *Med Care*. 2010 Feb;48(2):187–92.  
22
- 23 94. Smets T, Bilsen J, Cohen J, Rurup ML, Mortier F, Deliens L. Reporting of euthanasia in  
24 medical practice in Flanders, Belgium: cross sectional analysis of reported and unreported  
25 cases. *BMJ*. 2010 Oct;341:c5174.  
26
- 27 95. Smets T, Bilsen J, Van den Block L, Cohen J, Van Casteren V, Deliens L. Euthanasia in  
28 patients dying at home in Belgium: interview study on adherence to legal safeguards. *Br J  
29 Gen Pract*. 2010 Apr;60(573):e163-70.  
30
- 31 96. Sprij B. [Could it be a little less? Let the dose of thiopental in euthanasia depend on the  
32 body weight]. *Ned Tijdschr Geneesk*. 2010;154(43).  
33
- 34 97. Thienpont L, Verhofstadt M, Van Loon T, Distelmans W, Audenaert K, De Deyn PP.  
35 Euthanasia requests, procedures and outcomes for 100 Belgian patients suffering from  
36 psychiatric disorders: a retrospective, descriptive study. *BMJ Open*. 2015  
37 Jul;5(7):e007454.  
38
- 39 98. van Bruchem-van de Scheur GG, van der Arend AJG, Huijjer Abu-Saad H, van Wijmen  
40 FCB, Spreeuwenberg C, Ter Meulen RHJ. Euthanasia and assisted suicide in Dutch  
41 hospitals: the role of nurses. *J Clin Nurs*. 2008 Jun;17(12):1618–26.  
42
- 43 99. van Bruchem-van de Scheur GAG, van der Arend AJG, Abu-Saad HH, van Wijmen FCB,  
44 Spreeuwenberg C, ter Meulen RHJ. Alleviation of pain and symptoms with a life-  
45 shortening intention. *Nurs Ethics*. 2008 Sep;15(5):682–95.  
46
- 47 100. van der Heide A, Onwuteaka-Philipsen B, Rurup M, Buiting H, van Delden J, Hanssen-de  
48 Wolf J, et al. Medical decisions regarding the end of life in the Netherlands after the  
49 Euthanasia Act came into force; fourth national survey. *Dutch J Med*. 2007;151:1635–42.  
50  
51  
52  
53  
54  
55  
56  
57  
58  
59

- 1  
2  
3 101. van der Heide A, Onwuteaka-Philipsen BD, Rurup ML, Buiting HM, van Delden JJM,  
4 Hanssen-de Wolf JE, et al. End-of-life practices in the Netherlands under the Euthanasia  
5 Act. *N Engl J Med*. 2007 May;356(19):1957–65.  
6
- 7  
8 102. van Heest FB, Finlay IG, Kramer JJE, Otter R, Meyboom-de Jong B. Telephone  
9 consultations on palliative sedation therapy and euthanasia in general practice in The  
10 Netherlands in 2003: a report from inside. *Fam Pract*. 2009 Dec;26(6):481–7.  
11
- 12  
13 103. van Marwijk H, Haverkate I, van Royen P, The A-M. Impact of euthanasia on primary  
14 care physicians in the Netherlands. *Palliat Med*. 2007 Oct;21(7):609–14.  
15
- 16  
17 104. Wineberg H. Oregon’s Death with Dignity Act: fourteen months and counting. *Arch*  
18 *Intern Med*. 2000 Jan;160(1):21–3.
- 19  
20 105. Ziegler SJ, Bosshard G. Role of non-governmental organisations in physician assisted  
21 suicide. *BMJ*. 2007 Feb;334(7588):295–8.  
22
- 23  
24 106. Medical Assistance in Dying: Parenteral Pharmacologic Recommendations. *Health PEI*;  
25 2016.
- 26  
27 107. KNMG/KNMP Guidelines for the practice of Euthanasia and Physician-Assisted Suicide  
28 2012. [https://www.knmg.nl/web/file?uuid=c56c038c-ffcd-486e-](https://www.knmg.nl/web/file?uuid=c56c038c-ffcd-486e-a77407f7de104f94&owner=5c945405-d6ca-4deb-aa16-7af2088aa173&contentid=223&elementid=2003770)  
29 [a77407f7de104f94&owner=5c945405-d6ca-4deb-aa16-7af2088aa173&](https://www.knmg.nl/web/file?uuid=c56c038c-ffcd-486e-a77407f7de104f94&owner=5c945405-d6ca-4deb-aa16-7af2088aa173&contentid=223&elementid=2003770)  
30 [contentid=223&elementid=2003770](https://www.knmg.nl/web/file?uuid=c56c038c-ffcd-486e-a77407f7de104f94&owner=5c945405-d6ca-4deb-aa16-7af2088aa173&contentid=223&elementid=2003770). Accessed June 2017.  
31
- 32  
33 108. Euthanasia: a “kit” sold in Belgian pharmacies. *Prescrire Int*. 2005 Oct;14(79):197.
- 34  
35 109. Borgsteede SD, Rhodius CA, De Smet PAGM, Pasma HRW, Onwuteaka-Philipsen BD,  
36 Rurup ML. The use of opioids at the end of life: knowledge level of pharmacists and  
37 cooperation with physicians. *Eur J Clin Pharmacol*. 2011;67(1):79–89.  
38
- 39  
40 110. Bosshard G, Broeckaert B, Clark D, Materstvedt LJ, Gordijn B, Müller-Busch HC. A role  
41 for doctors in assisted dying? An analysis of legal regulations and medical professional  
42 positions in six European countries. *J Med Ethics*. 2008;34(1):28–32.  
43
- 44  
45 112. Burkhardt S, Macias A, Jousset N, La Harpe R. Assisted suicide: experiences and debates  
46 in Switzerland. *Med Droit*. 2015;155–60.
- 47  
48 113. Campbell CS, Black MA. Dignity, death, and dilemmas: a study of Washington hospices  
49 and physician-assisted death. *J Pain Symptom Manage*. 2014 Jan;47(1):137–53.  
50
- 51  
52 114. De Casterlé BD, Verpoort C, De Bal N, Gastmans C. Nurses’ views on their involvement  
53 in euthanasia: a qualitative study in Flanders (Belgium). *J Med Ethics*. 2006;32(4):187–  
54 92.  
55  
56  
57  
58  
59

- 1  
2  
3 115. Dees MK, Vernooij-Dassen MJ, Dekkers WJ, Elwyn G, Vissers KC, van Weel C.  
4 Perspectives of decision-making in requests for euthanasia: a qualitative research among  
5 patients, relatives and treating physicians in the Netherlands. *Palliat Med*. 2013  
6 Jan;27(1):27–37.  
7  
8  
9 116. Dierickx S, Deliens L, Cohen J, Chambaere K. Involvement of Palliative Care in People  
10 Receiving Euthanasia. In: Abstracts of the 9th World Research Congress of the European  
11 Association for Palliative Care (EAPC). 2016.  
12  
13 117. Fass J, Fass A. Physician-assisted suicide: ongoing challenges for pharmacists. *Am J*  
14 *Health Syst Pharm*. 2011 May;68(9):846–9.  
15  
16 118. Francke AL, Albers G, Bilsen J, de Veer AJE, Onwuteaka-Philipsen BD. Nursing staff  
17 and euthanasia in the Netherlands. A nation-wide survey on attitudes and involvement in  
18 decision making and the performance of euthanasia. *Patient Educ Couns*. 2016;99(5):783–  
19 9.  
20  
21  
22 119. Grube D. Oregon: Aid in Dying - Drug Protocol - Chloral Hydrate, Phenobarbital and  
23 Morphine. 2014.  
24  
25 120. Hedberg K, Hopkins D, Leman R, Kohn M. The 10-year experience of Oregon's Death  
26 with Dignity Act: 1998-2007. *J Clin Ethics*. 2009;20(124–32).  
27  
28 121. Hesselink BAM, Onwuteaka-Philipsen BD, Janssen A, Buiting HM, Kollau M, Rietjens  
29 JAC, et al. Do guidelines on euthanasia and physician-assisted suicide in Dutch hospitals  
30 and nursing homes reflect the law? A content analysis. *J Med Ethics*. 2012;38(1):35–42.  
31  
32  
33 122. Hicks MH-R. Physician-assisted suicide: a review of the literature concerning practical  
34 and clinical implications for UK doctors. *BMC Fam Pract*. 2006;7(1):39.  
35  
36  
37 123. Lemiengre J, De Casterlé BD, Denier Y, Schotsmans P, Gastmans C. Content analysis of  
38 euthanasia policies of nursing homes in Flanders (Belgium). *Med Heal Care Philos*.  
39 2009;12(3):313–22.  
40  
41  
42 124. Ministerio de Salud. Protocolo para la aplicación del procedimiento de eutanasia en  
43 Colombia [Internet]. 2015. Available from:  
44 [https://www.minsalud.gov.co/sites/rid/Lists/Biblioteca-Digital/RIDE/DE/CA/Protocolo-](https://www.minsalud.gov.co/sites/rid/Lists/Biblioteca-Digital/RIDE/DE/CA/Protocolo-aplicacion-procedimiento-eutanasia-colombia.pdf)  
45 [aplicacion-procedimiento-eutanasia-colombia.pdf](https://www.minsalud.gov.co/sites/rid/Lists/Biblioteca-Digital/RIDE/DE/CA/Protocolo-aplicacion-procedimiento-eutanasia-colombia.pdf). Accessed June 2017.  
46  
47  
48 125. Ogden RD, Hamilton WK, Whitcher C. Assisted suicide by oxygen deprivation with  
49 helium at a Swiss right-to-die organisation. *J Med Ethics*. 2010;36(3):174–9.  
50  
51  
52 126. Onwuteaka-Philipsen BD, Brinkman-Stoppelenburg A, Penning C, de Jong-Krul GJF, van  
53 Delden JJM, van der Heide A. Trends in end-of-life practices before and after the  
54 enactment of the euthanasia law in the Netherlands from 1990 to 2010: a repeated cross-  
55 sectional survey. *Lancet*. 2012;380(9845):908–15.  
56  
57  
58  
59  
60

- 1  
2  
3 127. Smets T, Bilsen J, Cohen J, Rurup ML, Mortier F, Deliens L. Medical decisions at the end  
4 of life in flanders, Belgium - A nationwide post-mortem survey of euthanasia cases  
5 reported and unreported to the federal review committee. *Palliat Med*. 2010;24(4):S46.  
6  
7  
8 128. Sullivan AD, Hedberg K, Fleming DW. Legalized Physician-Assisted Suicide in Oregon -  
9 The Second Year. *N Engl J Med* [Internet]. 2000 Feb 24;342(8):598–604. Available from:  
10 <https://doi.org/10.1056/NEJM200002243420822>  
11  
12 129. Wang LH, Elliott MA, Jung Henson L, Gerena-Maldonado E, Strom S, Downing S, et al.  
13 Death with dignity in Washington patients with amyotrophic lateral sclerosis. *Neurology*.  
14 2016 Nov;87(20):2117–22.  
15  
16  
17 130. Washington State Department of Health. Death with Dignity Act Report Executive  
18 Summary. [Internet]. 2015. Available from:  
19 [http://www.doh.wa.gov/portals/1/Documents/Pubs/422-109-](http://www.doh.wa.gov/portals/1/Documents/Pubs/422-109-DeathWithDignityAct2015.pdf)  
20 [DeathWithDignityAct2015.pdf](http://www.doh.wa.gov/portals/1/Documents/Pubs/422-109-DeathWithDignityAct2015.pdf) . Accessed June 2017.  
21  
22  
23 131. Weiss E, Downar J, editors. Ontario Maid Provider Handbook. [Internet]. Ontario College  
24 of Family Physicians Collaborative Mentoring Networks; 2018. Available from:  
25 <https://www.ontariofamilyphysicians.ca/files/maid-handbook-0-2-2018-august-2.pdf>.  
26  
27  
28 132. Ysebaert D, Detry O, Verfailli G, Mikhalski D, Van Raemdonck D. Abstracts of the 17th  
29 Congress of the European Society for Organ Transplantation 13 - 16 September 2015,  
30 Brussels, Belgium. *Transpl Int*. 2015 Nov;28 Suppl 4:1–856.  
31  
32 133. Emanuel EJ, Onwuteaka-Philipsen BD, Urwin JW, Cohen J. Attitudes and Practices of  
33 Euthanasia and Physician-Assisted Suicide in the United States, Canada, and Europe.  
34 *JAMA*. 2016 Jul;316(1):79–90.  
35  
36  
37  
38  
39  
40  
41  
42  
43  
44  
45  
46  
47  
48  
49  
50  
51  
52  
53  
54  
55  
56  
57  
58  
59  
60

## Preferred Reporting Items for Systematic reviews and Meta-Analyses extension for Scoping Reviews (PRISMA-ScR) Checklist

| SECTION                                               | ITEM | PRISMA-ScR CHECKLIST ITEM                                                                                                                                                                                                                                                                                  | REPORTED ON PAGE # |
|-------------------------------------------------------|------|------------------------------------------------------------------------------------------------------------------------------------------------------------------------------------------------------------------------------------------------------------------------------------------------------------|--------------------|
| <b>TITLE</b>                                          |      |                                                                                                                                                                                                                                                                                                            |                    |
| Title                                                 | 1    | Identify the report as a scoping review.                                                                                                                                                                                                                                                                   | 1                  |
| <b>ABSTRACT</b>                                       |      |                                                                                                                                                                                                                                                                                                            |                    |
| Structured summary                                    | 2    | Provide a structured summary that includes (as applicable): background, objectives, eligibility criteria, sources of evidence, charting methods, results, and conclusions that relate to the review questions and objectives.                                                                              | 3                  |
| <b>INTRODUCTION</b>                                   |      |                                                                                                                                                                                                                                                                                                            |                    |
| Rationale                                             | 3    | Describe the rationale for the review in the context of what is already known. Explain why the review questions/objectives lend themselves to a scoping review approach.                                                                                                                                   | 3                  |
| Objectives                                            | 4    | Provide an explicit statement of the questions and objectives being addressed with reference to their key elements (e.g., population or participants, concepts, and context) or other relevant key elements used to conceptualize the review questions and/or objectives.                                  | 4                  |
| <b>METHODS</b>                                        |      |                                                                                                                                                                                                                                                                                                            |                    |
| Protocol and registration                             | 5    | Indicate whether a review protocol exists; state if and where it can be accessed (e.g., a Web address); and if available, provide registration information, including the registration number.                                                                                                             | 4                  |
| Eligibility criteria                                  | 6    | Specify characteristics of the sources of evidence used as eligibility criteria (e.g., years considered, language, and publication status), and provide a rationale.                                                                                                                                       | 5                  |
| Information sources*                                  | 7    | Describe all information sources in the search (e.g., databases with dates of coverage and contact with authors to identify additional sources), as well as the date the most recent search was executed.                                                                                                  | 5                  |
| Search                                                | 8    | Present the full electronic search strategy for at least 1 database, including any limits used, such that it could be repeated.                                                                                                                                                                            | 5                  |
| Selection of sources of evidence†                     | 9    | State the process for selecting sources of evidence (i.e., screening and eligibility) included in the scoping review.                                                                                                                                                                                      | 5-6                |
| Data charting process‡                                | 10   | Describe the methods of charting data from the included sources of evidence (e.g., calibrated forms or forms that have been tested by the team before their use, and whether data charting was done independently or in duplicate) and any processes for obtaining and confirming data from investigators. | 6                  |
| Data items                                            | 11   | List and define all variables for which data were sought and any assumptions and simplifications made.                                                                                                                                                                                                     | 6                  |
| Critical appraisal of individual sources of evidence§ | 12   | If done, provide a rationale for conducting a critical appraisal of included sources of evidence; describe the methods used and how this information was used in any data synthesis (if appropriate).                                                                                                      | NA                 |

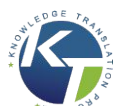

| SECTION                                       | ITEM | PRISMA-ScR CHECKLIST ITEM                                                                                                                                                                       | REPORTED ON PAGE # |
|-----------------------------------------------|------|-------------------------------------------------------------------------------------------------------------------------------------------------------------------------------------------------|--------------------|
| Synthesis of results                          | 13   | Describe the methods of handling and summarizing the data that were charted.                                                                                                                    | 6                  |
| <b>RESULTS</b>                                |      |                                                                                                                                                                                                 |                    |
| Selection of sources of evidence              | 14   | Give numbers of sources of evidence screened, assessed for eligibility, and included in the review, with reasons for exclusions at each stage, ideally using a flow diagram.                    | 7                  |
| Characteristics of sources of evidence        | 15   | For each source of evidence, present characteristics for which data were charted and provide the citations.                                                                                     | 7                  |
| Critical appraisal within sources of evidence | 16   | If done, present data on critical appraisal of included sources of evidence (see item 12).                                                                                                      | NA                 |
| Results of individual sources of evidence     | 17   | For each included source of evidence, present the relevant data that were charted that relate to the review questions and objectives.                                                           | Supplemental file  |
| Synthesis of results                          | 18   | Summarize and/or present the charting results as they relate to the review questions and objectives.                                                                                            | 7                  |
| <b>DISCUSSION</b>                             |      |                                                                                                                                                                                                 |                    |
| Summary of evidence                           | 19   | Summarize the main results (including an overview of concepts, themes, and types of evidence available), link to the review questions and objectives, and consider the relevance to key groups. | 9-10               |
| Limitations                                   | 20   | Discuss the limitations of the scoping review process.                                                                                                                                          | 11                 |
| Conclusions                                   | 21   | Provide a general interpretation of the results with respect to the review questions and objectives, as well as potential implications and/or next steps.                                       | 12                 |
| <b>FUNDING</b>                                |      |                                                                                                                                                                                                 |                    |
| Funding                                       | 22   | Describe sources of funding for the included sources of evidence, as well as sources of funding for the scoping review. Describe the role of the funders of the scoping review.                 | 12                 |

JBI = Joanna Briggs Institute; PRISMA-ScR = Preferred Reporting Items for Systematic reviews and Meta-Analyses extension for Scoping Reviews.

\* Where *sources of evidence* (see second footnote) are compiled from, such as bibliographic databases, social media platforms, and Web sites.

† A more inclusive/heterogeneous term used to account for the different types of evidence or data sources (e.g., quantitative and/or qualitative research, expert opinion, and policy documents) that may be eligible in a scoping review as opposed to only studies. This is not to be confused with *information sources* (see first footnote).

‡ The frameworks by Arksey and O'Malley (6) and Levac and colleagues (7) and the JBI guidance (4, 5) refer to the process of data extraction in a scoping review as data charting.

§ The process of systematically examining research evidence to assess its validity, results, and relevance before using it to inform a decision. This term is used for items 12 and 19 instead of "risk of bias" (which is more applicable to systematic reviews of interventions) to include and acknowledge the various sources of evidence that may be used in a scoping review (e.g., quantitative and/or qualitative research, expert opinion, and policy document).

From: Tricco AC, Lillie E, Zarin W, O'Brien KK, Colquhoun H, Levac D, et al. PRISMA Extension for Scoping Reviews (PRISMA-ScR): Checklist and Explanation. *Ann Intern Med.* 2018;169:467–473. doi: [10.7326/M18-0850](https://doi.org/10.7326/M18-0850).



St. Michael's

Inspired Care.  
Inspiring Science.

For peer review only - <http://bmjopen.bmj.com/site/about/guidelines.xhtml>



# BMJ Open

## The provision of medical assistance in dying: a scoping review

|                                 |                                                                                                                                                                                                                                                                                                                                                                                                                                                                                                                                                                                                                                                                                                                                                                                               |
|---------------------------------|-----------------------------------------------------------------------------------------------------------------------------------------------------------------------------------------------------------------------------------------------------------------------------------------------------------------------------------------------------------------------------------------------------------------------------------------------------------------------------------------------------------------------------------------------------------------------------------------------------------------------------------------------------------------------------------------------------------------------------------------------------------------------------------------------|
| Journal:                        | <i>BMJ Open</i>                                                                                                                                                                                                                                                                                                                                                                                                                                                                                                                                                                                                                                                                                                                                                                               |
| Manuscript ID                   | bmjopen-2019-036054.R1                                                                                                                                                                                                                                                                                                                                                                                                                                                                                                                                                                                                                                                                                                                                                                        |
| Article Type:                   | Original research                                                                                                                                                                                                                                                                                                                                                                                                                                                                                                                                                                                                                                                                                                                                                                             |
| Date Submitted by the Author:   | 13-Mar-2020                                                                                                                                                                                                                                                                                                                                                                                                                                                                                                                                                                                                                                                                                                                                                                                   |
| Complete List of Authors:       | Zworth, Max; McMaster University Michael G DeGroot School of Medicine,<br>Saleh, Carol; McMaster University, Medicine<br>Ball, Ian; Western University, Division of Critical Care Medicine<br>Kalles, Gaelen; Hamilton Health Sciences<br>Chkaroubo, Anatoli; Hamilton Health Sciences<br>Kekewich, Mike; Ottawa Hospital, Clinical and Organizational Ethics<br>Miller, Paul; Hamilton Health Sciences, Emergency Medicine; McMaster University, Medicine (Emergency Medicine)<br>Dees, Marianne; Radboudumc, Department for Primary and Community Care<br>Frolic, Andrea; Hamilton Health Sciences, Clinical and Organizational Ethics<br>Oczkowski, Simon; McMaster University, Medicine (Critical Care); McMaster University, Department of Health Research Methods, Evidence, and Impact |
| <b>Primary Subject Heading</b>: | Evidence based practice                                                                                                                                                                                                                                                                                                                                                                                                                                                                                                                                                                                                                                                                                                                                                                       |
| Secondary Subject Heading:      | Palliative care                                                                                                                                                                                                                                                                                                                                                                                                                                                                                                                                                                                                                                                                                                                                                                               |
| Keywords:                       | PALLIATIVE CARE, Adult intensive & critical care < INTENSIVE & CRITICAL CARE, Protocols & guidelines < HEALTH SERVICES ADMINISTRATION & MANAGEMENT, MEDICAL ETHICS                                                                                                                                                                                                                                                                                                                                                                                                                                                                                                                                                                                                                            |
|                                 |                                                                                                                                                                                                                                                                                                                                                                                                                                                                                                                                                                                                                                                                                                                                                                                               |

SCHOLARONE™  
Manuscripts



I, the Submitting Author has the right to grant and does grant on behalf of all authors of the Work (as defined in the below author licence), an exclusive licence and/or a non-exclusive licence for contributions from authors who are: i) UK Crown employees; ii) where BMJ has agreed a CC-BY licence shall apply, and/or iii) in accordance with the terms applicable for US Federal Government officers or employees acting as part of their official duties; on a worldwide, perpetual, irrevocable, royalty-free basis to BMJ Publishing Group Ltd ("BMJ") its licensees and where the relevant Journal is co-owned by BMJ to the co-owners of the Journal, to publish the Work in this journal and any other BMJ products and to exploit all rights, as set out in our [licence](#).

The Submitting Author accepts and understands that any supply made under these terms is made by BMJ to the Submitting Author unless you are acting as an employee on behalf of your employer or a postgraduate student of an affiliated institution which is paying any applicable article publishing charge ("APC") for Open Access articles. Where the Submitting Author wishes to make the Work available on an Open Access basis (and intends to pay the relevant APC), the terms of reuse of such Open Access shall be governed by a Creative Commons licence – details of these licences and which [Creative Commons](#) licence will apply to this Work are set out in our licence referred to above.

Other than as permitted in any relevant BMJ Author's Self Archiving Policies, I confirm this Work has not been accepted for publication elsewhere, is not being considered for publication elsewhere and does not duplicate material already published. I confirm all authors consent to publication of this Work and authorise the granting of this licence.

## The provision of medical assistance in dying: a scoping review

Max Zworth<sup>1</sup>, Carol Saleh<sup>2</sup>, Ian Ball MD<sup>3</sup>, Gaelen Kalles RN<sup>4</sup>, Anatoli Chkaroubo<sup>4</sup>, Mike Kekewich<sup>5</sup>, Paul Miller<sup>4,6</sup>, Marianne Dees<sup>7</sup>, Andrea Frolic<sup>4</sup>, Simon J W Oczkowski MD<sup>2,4,8</sup>

### Author affiliations

1. Michael G. DeGroot School of Medicine, McMaster University, Hamilton, Canada
2. Department of Medicine, McMaster University, Hamilton, Canada
3. Division of Critical Care Medicine, Western University, London, Canada
4. Hamilton Health Sciences, Hamilton, Canada
5. Department of Clinical and Organizational Ethics, The Ottawa Hospital, Ottawa, Canada
6. Division of Emergency Medicine, Department of Medicine, McMaster University, Hamilton, Canada
7. Department for Primary and Community Care, Radboud University Medical Center, Nijmegen, The Netherlands
8. Department of Health Research Methods, Evidence, and Impact, McMaster University, Hamilton, Canada

### **Corresponding author:**

Max Zworth  
Michael G. DeGroot School of Medicine, McMaster University  
1280 Main Street West  
Hamilton, ON, Canada, L8S 4L8  
[max.zworth@medportal.ca](mailto:max.zworth@medportal.ca)

### **Funding**

This research is supported by a Hamilton Academic Health Sciences Organization's innovation fund. Dr. Oczkowski is supported by an internal career award from the Department of Medicine at McMaster University. Max Zworth is supported by the McMaster Medical Student Research Excellence Scholarship (MAC RES).

**Tables: 4**

**Figures: 3**

**Word count: 3097**

## Abstract (maximum 300 words)

**Objectives:** The purpose of this study is to map the characteristics of the existing medical literature describing the medications, settings, participants and outcomes of medical assistance in dying (MAID), in order to identify knowledge gaps and areas for future research.

**Design:** Scoping review

**Search strategy:** We searched electronic databases (MEDLINE, EmBASE, PsychINFO, CINAHL, CENTRAL), clinical trial registries, conference abstracts, and professional guidelines from jurisdictions where MAID is legal, up to February 2020. Eligible report types included technical summaries, institutional policies, practice surveys, practice guidelines and clinical studies that describe MAID provision in adults who have provided informed consent for MAID.

**Results:** 163 articles published between 1989 and 2020 met eligibility criteria. 75 studies described details for MAID administered by IV medications, and 50 studies provided data on oral medications. In IV protocols, MAID was most commonly administered using a barbiturate (34/163) or propofol (22/163) followed by a neuromuscular blocker. Oral protocols most often used barbiturates alone (37/163) or in conjunction with an opioid medication (7/163). and often recommended using a prokinetic agent prior to lethal drug ingestion. Complications included prolonged duration of the dying process, difficulty obtaining IV access, and difficulty swallowing oral agents. Most commonly, the role of physicians was prescribing (83/163) and administering medications (75/163). Nurses roles included administering medications (17/163) and supporting the patient (16/163) or family (13/163). The role of families involved providing support to the patient (17/163) and bringing medications from pharmacy for self-administration (4/163).

**Conclusions:** We identified several trends in MAID provision including common medications and doses for oral and parenteral administration, roles of healthcare professionals and families, and complications that may cause patient, family and provider distress. Future research should aim to identify the medications, dosages, and administration techniques and procedures which produce the most predictable outcomes and mitigate distress for those involved.

**Key words:** assisted dying, euthanasia, assisted suicide, physician assisted dying, scoping review

## Article Summary:

### Strengths and limitations of this study:

- We conducted a scoping review of MAID provision using very broad and inclusive search strategy and a pre-published protocol
- Screening was performed in duplicate by two investigators at both the title/abstract and full-text level
- We describe a wide variety of methods for providing MAID, though few reports described the number of times the protocol has been used
- The reports we found did not generally link data between medications, locations, providers, and outcomes, making it difficult to determine which medications or combinations of medications are most effective and result in the fewest complications
- Our study is limited by its emphasis on Canadian practice, which is likely due both to most authors being Canadian, and the more standardized approaches to MAID provision in European countries compared to North America

## Introduction

In 2016, the Canadian government passed Bill C-14, which decriminalized medical assistance in dying (MAID) for capable patients with intolerable suffering for whom death was 'reasonably foreseeable.'<sup>(1)</sup> As of October 2018 there have been over 6749 medically assisted deaths in Canada, and MAID accounted for approximately 1.12% of all deaths in Canada in the first 10 months of 2018.<sup>(2)</sup> Bill C-14 legislated eligibility criteria under which patients could receive MAID, but provided no guidance on the clinical aspects of providing aid in dying. Critical clinical issues remain unaddressed, such as which pharmaceuticals, doses, and routes of administration should be used to cause death; the roles, scope of practice, and training requirements for health care professionals; the optimal locations for MAID (community, institutional settings, or in dedicated centers); and ways to support patients and their families around the time of an assisted death. Several other jurisdictions currently permit MAID in the form of assisted suicide (Switzerland, and the American states of Oregon, Montana, Washington, California, Colorado, Vermont, Washington DC, New Jersey, Maine, Hawaii),

1  
2  
3 euthanasia (Columbia), or both (Belgium, the Netherlands and Luxembourg).(3) While states  
4 such as Oregon maintain detailed records for all cases of MAID (4), there are few centralized  
5 protocols for MAID provision in these settings (5), and there remains little readily available  
6 evidence to assist Canadian clinicians and organizations in addressing these questions. Thus,  
7 Canadian health care providers and organizations had to rapidly develop policies and practices  
8 for the assessment and provision of MAID in anticipation of this legislative change. Some  
9 provinces (such as Alberta and Manitoba) have developed highly centralized care coordination  
10 services, while others (such as Ontario) have adopted a hands-off approach, allowing individual  
11 clinicians and health care organizations to develop local policies and protocols for MAID. As a  
12 result, there is significant variation in how MAID is practiced across Canada.  
13  
14  
15  
16  
17  
18  
19  
20

21 This is worrisome, as data from other countries suggests that clinical problems with  
22 MAID care are common, including poor communication between health care providers and  
23 patients, inconsistent application of eligibility criteria, unequal access, and technical problems  
24 with medication administration.(6-10) Though new federal reporting requirements for MAID  
25 took effect in 2018, the collected data is descriptive, and not intended to evaluate the quality or  
26 consistency of MAID provision.(11) While an abundance of literature has emerged in recent  
27 years discussing ethical questions around MAID and the experiences of those involved in the  
28 MAID process, there is relatively sparse literature addressing the medical aspects of providing  
29 aid in dying. Thus, we conducted a scoping review on MAID provision in all jurisdictions where  
30 medically assisted dying is practiced, with two primary objectives:  
31  
32  
33  
34  
35  
36  
37  
38  
39

- 40 1. To describe the range and scope of the existing medical literature on the provision of  
41 MAID
- 42 2. To summarize reports of the technical aspects of MAID provision, including  
43 pharmaceuticals and procedures; location of provision; the role and scope of involved  
44 healthcare professionals; role of patients' families; and descriptions of adverse events.  
45  
46  
47  
48  
49

## 50 **Methods**

### 51 Protocol and registration

52  
53  
54  
55  
56  
57  
58  
59  
60

1  
2  
3 The methods of this scoping review are based on those described in the Joanna Briggs Institute  
4 Reviewers Manual (12) and are described in detail in a previously published study protocol (13).  
5  
6  
7

### 8 Eligibility criteria

9  
10 Eligible sources included technical reports, institutional policies, practice surveys, clinical  
11 practice guidelines and clinical studies. Opinion pieces/letters were excluded, as were reports  
12 solely describing the assessment of patient eligibility for MAID. No restrictions were imposed  
13 based on methodological quality, study location, language or publication date. We included  
14 reports referring to adult (age > 18 years) patients who provided informed consent for MAID in  
15 the form of either assisted suicide (self-administered lethal medications) or voluntary  
16 euthanasia (lethal medications administered by another person). We included reports  
17 describing the provision of MAID using any medication delivery method, in institutions and  
18 residences, which involved a healthcare professional such as a physician, nurse, or pharmacist.  
19 We excluded reports describing other end-of-life practices, including withholding or  
20 withdrawing life-sustaining treatment; palliative sedation or unintentional hastening of death  
21 via medications for symptom management, unless such reports also included separate  
22 descriptions of MAID. Studies in which patients received euthanasia without having provided  
23 informed consent (eg. capital punishment) were excluded (Table 1).  
24  
25  
26  
27  
28  
29  
30  
31  
32  
33  
34  
35  
36  
37

### 38 Information Sources and Searches

39  
40 Briefly, we conducted systematic searches of multiple online databases, including MEDLINE,  
41 EMBASE, CINAHL, CENTRAL and PsycINFO from database inception to February 2020 for the  
42 concept of MAID ('[medical] aid [assistance] in dying', 'euthanasia', 'assisted suicide',  
43 '[physician] assisted dying', '[physician] assisted death', 'end of life choice') and the concept of  
44 medication administration ('practice patterns', 'drug administration', 'medication  
45 management', 'drug utilization', 'drug therapy'). Complete search details are available online  
46 (10). We also conducted extensive grey literature searches, including clinical trial databases,  
47 conference abstracts from palliative care conferences, technical reports of MAID protocols and  
48 institutional policies for MAID until June 2018. Finally, we contacted professional groups and  
49  
50  
51  
52  
53  
54  
55  
56  
57  
58  
59  
60

1  
2  
3 government agencies that monitor and regulate healthcare to obtain protocols and reports  
4 describing the provision of MAID.  
5  
6  
7

### 8 Selection of sources of evidence

9  
10 Report eligibility was determined first by title and abstract screening, and second by full-text  
11 screening. After pilot-testing the screening and eligibility forms on the first 100 abstracts and 10  
12 full-text papers, two investigators (CS, SJO) independently reviewed each report's eligibility for  
13 inclusion in the review. During the course of the review, no changes were made to the inclusion  
14 or exclusion criteria.  
15  
16  
17  
18  
19

### 20 Data charting process

21  
22 We conducted calibration exercises on the first 5 eligible studies to pilot-test the extraction  
23 form and ensure consistent data collection. Two investigators (MZ, CS) then independently  
24 extracted data using structured forms divided into three major concepts: report characteristics,  
25 methods of MAID provision, and MAID outcomes (Supplementary file 1). The data collection  
26 form was not modified throughout the extraction process. As our study's objectives were  
27 descriptive, we did not conduct a critical appraisal of the individual studies we retrieved.  
28  
29  
30  
31  
32  
33  
34  
35

### 36 Synthesis of results

37  
38 Data were organized according to the three major concepts listed above (report characteristics;  
39 MAID provision; and MAID outcomes). Univariate descriptive statistics were computed for  
40 report characteristics, including year of publication, report type and report purpose, in order to  
41 provide an overview of the scope and content of the existing literature on MAID. Descriptive  
42 statistics (frequency, proportion of studies) were also calculated for categorical data regarding  
43 MAID provision, including medications and dosages used in IV and oral protocols, order of  
44 medication administration, and MAID locations. Non-categorical information about MAID  
45 provision such as the roles ascribed to various health professionals and safety checks was  
46 compiled into a list format, and a team of three investigators extracted common themes by  
47 consensus. Similarly, data regarding MAID outcomes and complications was summarized by  
48  
49  
50  
51  
52  
53  
54  
55  
56  
57  
58  
59  
60



1  
2  
3 identifying keywords (eg. “IV access” or “time to death”), and from there descriptive statistics  
4 were generated regarding the frequency with which various complications were identified in  
5 the literature.  
6  
7  
8  
9

## 10 **Results**

### 11 Selection of sources of evidence

12 The initial online database search identified 12514 potential reports, and 22 additional reports  
13 were identified through the grey literature search (Figure 1). After removing duplicate items,  
14 11470 abstracts were screened, 582 of which met initial eligibility criteria and were assessed  
15 through full-text screening. Among these, articles were removed if they were of an ineligible  
16 reference type, reported on an ineligible population, only addressed MAID eligibility rather than  
17 provision, could not be successfully accessed, or were one of multiple reports on the same  
18 data. After applying these exclusion criteria, 163 articles were included in the review (see  
19 supplementary file 2).  
20  
21  
22  
23  
24  
25  
26  
27  
28  
29

### 30 Characteristics of sources of evidence

31 The identified reports were published between 1989 and 2019, with the greatest number  
32 published in 2010 (n=14) and 2016 (n=15), and 50% of reports published in 2009 or later.  
33 Report types included non-systematic reviews (including policy and legal reviews) (n=53), cross-  
34 sectional surveys (n=32), MAID medication protocols (n=19), cohort studies (n=22), cross-  
35 sectional studies, including death certificate studies (n=14), qualitative studies (n=13), clinical  
36 practice guidelines/best practices (n=6), systematic reviews (n=2) (Table 2). Reports described  
37 MAID provision in The Netherlands (n=45), United States (n=43), Belgium (n=29), Canada  
38 (n=22), Switzerland (n=8), or multiple regions (n=13). For a complete list of data charted from  
39 each source of evidence, see supplementary file 3.  
40  
41  
42  
43  
44  
45  
46  
47  
48  
49

### 50 Synthesis of results

#### 51 *Medications*

1  
2  
3 Close to half of the reports provided details for MAID administered by IV medications (75/163).  
4  
5 A sample protocol for MAID administration by IV medication is presented in Figure 2 and the  
6  
7 frequencies and doses encountered for IV medications are shown in Table 3. The use of a  
8  
9 general anaesthetic in combination with a neuromuscular blocker (NMB) was described in 57%  
10  
11 of these studies (43/75). The general anaesthetic mentioned was most commonly a barbiturate  
12  
13 (34/43) or propofol (22/43). Neuromuscular blocking agents most commonly used were  
14  
15 cisatracurium, rocuronium, and pancuronium. Of the 75 reports discussing IV protocols, 29  
16  
17 referred to the use of an anxiolytic prior to medication administration. Only two directly cardio-  
18  
19 toxic agents were reported, bupivacaine (2/75) and potassium chloride (2/75)  
20

21  
22 Oral MAID regimes were detailed in 50/163 reports. A sample protocol for oral administration is  
23  
24 presented in Figure 3, and the frequencies and doses for oral medications are presented in  
25  
26 Table 4. Barbiturate medications are mentioned in 94% of oral protocols (47/50). The life-ending  
27  
28 drug was a barbiturate alone in 74% (37/50) of oral regime studies, though barbiturates were  
29  
30 also occasionally used with an opioid medication (14%, 7/50) or an alcohol (6%, 3/50).  
31  
32 Pentobarbital and secobarbital were the oral barbiturates most commonly mentioned, each  
33  
34 referred to in 34% (17/50) of studies. Additionally, barbiturates were mentioned without specific  
35  
36 medications or doses in 34% (17/50) of reports. A single report described a combination of  
37  
38 propranolol, digoxin, and diazepam. To avoid vomiting, antiemetics, most commonly  
39  
40 metoclopramide (7/50) or ondansetron (5/50) were given prior to administration of life-ending  
41  
42 drugs was included in 36% of oral reports (18/50). Anxiolytic medication such as midazolam or  
43  
44 lorazepam appear in 12% (6/50) of studies. An "as-needed" IV neuromuscular blocker was  
45  
46 described as a backup in case of failure of oral medications in 26% (13/50) of reports. A single  
47  
48 report described the use of helium gas to induce unconsciousness and death.

#### 49 *Locations where assisted dying takes place*

50  
51 65/163 articles described the setting for MAID administration. The two most common locations  
52  
53 for MAID provision were in hospital (43/65) and at the patient's home (43/65). Other settings  
54  
55  
56  
57  
58  
59

1  
2  
3 include nursing home (24/65), hospice (7/65) and other settings (7/65), including locations such  
4 as the headquarters of the non-governmental organization Dignitas in Switzerland.  
5  
6  
7

### 8 *The role of health professionals in assisted dying*

9  
10 The three health professions whose roles in MAID provision were most often described  
11 were physicians (106/163), nurses (33/163) and pharmacists (32/163). Common roles described  
12 for physicians included prescribing (83/106) and administering (75/106) medications, being  
13 present at death (24/106) and pronouncing death (12/106). The role of nurses was most often  
14 to administer medication (17/35), support the patient (16/35), prepare the route of  
15 administration (13/35) and prepare medications (6/35). Pharmacists' involvement was mainly  
16 to dispense medication (34/35), and also included educating patients regarding the dispensed  
17 drugs (12/35) and securing unused drugs (7/35). Certain studies also discussed the involvement  
18 of other individuals, such as NGO volunteers (Switzerland), other allied health such as child life  
19 specialists, designated MAID coordinators and palliative care consultants. Finally, the role of  
20 family members was occasionally described (21 studies), and included supporting the patient  
21 (17/21), retrieving medications (4/21) and assisting the preparation or administration oral life-  
22 ending medications (3/21).  
23  
24  
25  
26  
27  
28  
29  
30  
31  
32  
33  
34  
35

### 36 *Outcomes and complications of assisted dying*

37  
38 Of the 163 reports found, 40 described outcomes and complications in MAID provision. For IV  
39 administration (n=22), complications included difficulty obtaining or maintaining IV access  
40 (4/22), the patient dying too slowly or not dying (6/22), patient dying too quickly (3/22),  
41 difficulty pushing a large syringe, pain on injection, need for backup kit, and inappropriate drugs  
42 given (1/22 each). For oral administration (n=17), complications included prolonged duration of  
43 the dying process (13/17), vomiting (6/17), myoclonus/seizures (2/17), poor taste of the  
44 cocktail, and the need for IV backup (1/17). One study describing inhalation route described  
45 moor mask fit problems.  
46  
47  
48  
49  
50  
51  
52  
53

## 54 **Discussion**

### *Summary of evidence*

We found 163 published and unpublished reports describing the provision of medical assistance in dying which varied greatly in geographic origin, report type, and items reported. The content of the reports was correspondingly diverse, with a wide variety of medications used for both intravenous and oral routes. Intravenous drugs were usually given in a sequence, with an anxiolytic (most commonly midazolam), followed by a sedative/anesthetic (with or without an opioid) followed by a neuromuscular blocker. Direct cardiotoxic medications (eg. potassium, bupivacaine) were used infrequently, despite the fact that these would be expected to result in a rapid, painless death very shortly after injection. There are several possible reasons for this. Firstly, providers may be unfamiliar with and thus reluctant to use these agents, as outside of MAID, clinicians rarely administer drugs which are designed to stop a patient's heart. Secondly, anticipated discomfort of providers and families with immediate death— "death happened too quickly" was described as a complication in three reports, indicating that even with a planned rapid assisted death, people still expect there to be a "process" of dying after medications are administered. Thirdly, it may be that MAID providers are uncomfortable with the directness of injecting a medication and stopping the patient's heart. Administering a neuromuscular blocker and waiting for a patient to die of CO<sub>2</sub> narcosis or hypoxia maintains some element of "indirectness" to the patient's death. Finally, these medications may be avoided simply because it is not required to directly stop the heart in the presence of deep sedation and anoxia— thus cardiotoxic agents are seen as unnecessary.

The reports we found did not generally link data between medications, locations, providers, and outcomes. As a result it is not possible to determine which medications or combinations of medications are most effective and result in the fewest complications and least distress for patients, providers, and families. However, for providers and health care organizations which provide assisted dying, our scoping review does provide an overview of what the most commonly described practices are, worldwide. There is a need for future research in this area, including understanding patient and family perspectives of what makes a "good" assisted death; descriptions of which complications are most burdensome to patients, families, and providers; consistent definitions and outcome reporting practices of MAID

1  
2  
3 provision; and comprehensive, prospective data collection of clinical practice. Taken together,  
4 this information would allow comparative research between different approaches to MAID, and  
5 allow clinical researchers to identify the medications, dosages, and administration techniques  
6 and procedures which are cost effective, simple to administer and mitigate distress for those  
7 involved.  
8  
9  
10  
11  
12  
13

### 14 *Strengths*

15  
16 Strengths of our scoping review included its very broad and inclusive search strategy, screening  
17 in duplicate by two investigators at both the title/abstract and full-text level. As well, we used a  
18 pre-published protocol which allowed for a peer review and input prior to study completion,  
19 and to ensure that our very broad review accomplished and reported its stated objectives and  
20 outcomes.  
21  
22  
23  
24  
25  
26

### 27 *Limitations*

28  
29 While we described a wide variety of methods for providing MAID, few reports  
30 described the number of times the protocol has been used. Similarly, there are likely to be  
31 differences between what is written in a protocol and what is actually done in practice. It also  
32 does not capture practices which are not formally recorded, either as a publication, or as a  
33 policy or procedure. As a result, our review cannot provide insight into which approaches to  
34 providing aid in dying are most commonly used but only those which are most commonly  
35 described in written form. As well, policies and protocols from older reports may have changed  
36 since their first publication in the medical literature.  
37  
38  
39  
40  
41  
42

43  
44 Our study is also limited by its emphasis on Canadian practice. As most of this review's  
45 authors are Canadian, we were able to gather a larger number of policies and protocols from  
46 Canada, despite vigorous attempts to obtain them from other jurisdictions. The comparatively  
47 small number of protocols from other countries may be related to the development of regional  
48 standardized approaches to MAID provision (eg. the national Dutch Protocol) resulting in a  
49 smaller total number of policies and protocols, and due to a paucity of English-language  
50 protocols and policies. Of note, the Canadian policies and protocols are more recent than those  
51  
52  
53  
54  
55  
56  
57  
58  
59  
60

1  
2  
3 in other countries (eg. The Netherlands, Belgium, Luxembourg, and USA), generally dating back  
4 to the passage of Bill C-14 in June 2016. Canadian policy and practice is likely to undergo further  
5 changes as more experience with MAID is accrued, potentially limiting our report's validity as a  
6 description of current practice. Reassuringly, we have informally reviewed a sample of more  
7 recent Canadian MAID protocols and found there to be little difference. Data from the Fourth  
8 Interim Report on MAID suggests that to date, the vast majority of assisted deaths in Canada  
9 continue to use the intravenous route<sup>2</sup>.  
10  
11  
12  
13  
14  
15  
16  
17

### 18 *Conclusions*

19 We described the published and unpublished literature on MAID provision including common  
20 medications and doses, roles of healthcare professionals and families, and complications that  
21 may cause distress. Future research should aim to identify the medications, dosages, and  
22 administration techniques and procedures, which produce the most predictable outcomes and  
23 mitigate distress for those involved.  
24  
25  
26  
27  
28  
29

### 30 **Disclosures and Acknowledgements**

31 This research is supported by a Hamilton Academic Health Sciences Organization's innovation  
32 fund. Dr. Oczkowski is supported by an internal career award from the Department of Medicine  
33 at McMaster University. Max Zworth is supported by the McMaster Medical Student Research  
34 Excellence Scholarship (MAC RES). Thank you to the numerous MAID providers and health care  
35 organizations which provided us access to their policies and protocols. Thank you to Laura  
36 Banfield, who provided assistance with the electronic search strategies.  
37  
38  
39  
40  
41  
42  
43  
44

### 45 **Competing Interests**

46 None declared.  
47  
48  
49

### 50 **Patient and Public Involvement**

51 This research was done without patient involvement. Patients were not invited to comment on  
52 the study design and were not consulted to develop patient relevant outcomes or interpret the  
53  
54  
55  
56  
57  
58  
59  
60

1  
2  
3 results. Patients were not invited to contribute to the writing or editing of this document for  
4 readability or accuracy.  
5  
6  
7

## 8 **Data Availability**

9  
10 The majority of data relevant to this study are included in supplementary file 3. Additional data  
11 are available upon request.  
12  
13  
14

## 15 **Author Contributions**

- 16 • Max Zworth assisted with data acquisition and interpretation, manuscript drafting and  
17 revision.
- 18 • Carol Saleh assisted with conception of the study, data acquisition, and revision  
19 Ian Ball assisted with study conception, design and manuscript revision.
- 20 • Gaelen Kalles assisted with study conception, design and manuscript revision.
- 21 • Anatoli Chkaroubo assisted with study conception, design and manuscript revision.
- 22 • Mike Kekewich assisted with study conception, design and manuscript revision.
- 23 • Paul Miller assisted with study conception, design and manuscript revision.
- 24 • Marianne Dees assisted with study conception, design and manuscript revision.
- 25 • Andrea Frolic assisted with study conception, design and manuscript revision.
- 26 • Simon J W Oczkowski assisted with study conception, design, data acquisition, drafting  
27 and revision.  
28  
29  
30  
31  
32  
33

## 34 **References**

- 35 1. First Session of the Parliament of Canada. *Bill C-14: an Act to amend the Criminal Code*  
36 *and to make related amendments to other acts (medical assistance in dying)*. (2016).
- 37 2. Health Canada. *Fourth Interim Report on Medical Assistance in Dying in Canada*. (2019).
- 38 3. Nicol J. Medical Assistance in Dying: The Law in Selected Jurisdictions Outside Canada.  
39 2019.
- 40 4. Harty C, Chaput AJ, Trouton K, Buna D, Naik VN. Oral medical assistance in dying (MAiD):  
41 informing practice to enhance utilization in Canada. *Can J Anaesth*. 2019 Sep;66(9):1106–  
42 12.
- 43 5. Hedberg K, New C. Oregon's Death With Dignity Act: 20 Years of Experience to Inform  
44 the Debate. *Ann Intern Med*. 2017 Sep 19;167.
- 45 6. Hendin, H., Rutenfrans, C. & Zylicz, Z. Physician-Assisted Suicide and Euthanasia in the  
46 Netherlands: Lessons From the Dutch. *JAMA* **277**, 1720–1722 (1997).
- 47 7. Groenewoud, J. H. *et al*. Clinical problems with the performance of euthanasia and  
48  
49  
50  
51  
52  
53  
54  
55  
56  
57  
58  
59  
60

- 1  
2  
3 physician-assisted suicide in The Netherlands. *N. Engl. J. Med.* **342**, 551–556 (2000).  
4  
5 8. Chin AE, Hedberg K, Higginson GK, F. D. Legalized Physician-Assisted Suicide in Oregon —  
6 The First Year’s Experience. *N. Engl. J. Med.* **340**, 83 (1999).  
7  
8 9. Sullivan, A. D., Hedberg, K. & Fleming, D. W. Legalized Physician-Assisted Suicide in  
9 Oregon — The Second Year. *N. Engl. J. Med.* **342**, 598–604 (2000).  
10  
11 10. Ganzini, L. *et al.* Physicians’ Experiences with the Oregon Death with Dignity Act. *N. Engl.*  
12 *J. Med.* **342**, 557–563 (2000).  
13  
14 11. Government of Canada. Regulations for the Monitoring of Medical Assistance in Dying:  
15 SOR/2018-166. *Canada Gazette, Part II* 152(16) (2018).  
16  
17 12. Joanna Briggs Institute. The Joanna Briggs institute reviewers’ manual 2015:  
18 Methodology for JBI scoping reviews. *Aust. Joanna Briggs Inst.* (2015).  
19  
20 13. Oczkowski, S. J. W. *et al.* The provision of medical assistance in dying: protocol for a  
21 scoping review. *BMJ Open* **7**, e017888 (2017).  
22  
23  
24  
25  
26  
27  
28  
29  
30  
31  
32  
33  
34  
35  
36  
37  
38  
39  
40  
41  
42  
43  
44  
45  
46  
47  
48  
49  
50  
51  
52  
53  
54  
55  
56  
57  
58  
59  
60



1  
2  
3 **Tables**  
4

5 Table 1: Inclusion and exclusion criteria  
6

|                               | <b>Inclusion Criteria</b>                                                                                                                                         | <b>Exclusion Criteria</b>                                                                                                                                                                                                                                                                                      |
|-------------------------------|-------------------------------------------------------------------------------------------------------------------------------------------------------------------|----------------------------------------------------------------------------------------------------------------------------------------------------------------------------------------------------------------------------------------------------------------------------------------------------------------|
| <b>Types of sources</b>       | Technical report<br>Institutional policy<br>Practice survey<br>Clinical practice guideline/recommendation<br>Case report<br>Observational study<br>Clinical trial | Opinion piece/letter                                                                                                                                                                                                                                                                                           |
| <b>Types of patients</b>      | Adults (age>18 years)<br>Provided informed consent for MAID (assisted suicide or voluntary euthanasia), for any reason                                            | Patients receiving involuntary euthanasia (capital punishment)                                                                                                                                                                                                                                                 |
| <b>Types of interventions</b> | Provision of assisted suicide or voluntary euthanasia with involvement of a healthcare professional (physician, nurse, pharmacist, etc.)                          | Assisted suicide or euthanasia without involvement of a health professional<br>Description of assessment/eligibility for MAID alone<br>Description of ethics or acceptability of MAID<br>Non-MAID end-of-life practices, including withdrawing/withholding treatments; palliative sedation; or palliative care |

Table 2: Report setting, study design, and type of MAID protocol

|                                                | Number (% of total studies) |
|------------------------------------------------|-----------------------------|
| <b>Country of study</b>                        |                             |
| Netherlands                                    | 44 (27.0)                   |
| United States                                  | 43 (26.4)                   |
| Belgium                                        | 27 (16.6)                   |
| Canada                                         | 22 (13.5)                   |
| Multi-region                                   | 14 (8.6)                    |
| Switzerland                                    | 8 (4.9)                     |
| Other                                          | 5 (3.1)                     |
| <b>Report type</b>                             |                             |
| Non-systematic review                          | 53 (32.5)                   |
| Survey                                         | 32 (19.6)                   |
| MAID protocol                                  | 19 (11.7)                   |
| Cohort study (retrospective)                   | 22 (13.5)                   |
| Cross sectional (including death certificates) | 13 (8.0)                    |
| Qualitative study                              | 13 (8.0)                    |
| Clinical practice guideline/manual/handbook    | 5 (3.1)                     |
| Systematic review                              | 2 (1.2)                     |
| Other                                          | 4 (2.5)                     |
| <b>Protocol described</b>                      |                             |
| IV                                             | 75 (46)                     |
| Oral                                           | 50 (30.7)                   |
| None                                           | 38 (23.3)                   |

1  
2  
3  
4  
5  
6  
7  
8  
9  
10  
11  
12  
13  
14  
15  
16  
17  
18  
19  
20  
21  
22  
23  
24  
25  
26  
27  
28  
29  
30  
31  
32  
33  
34  
35  
36  
37  
38  
39  
40  
41  
42  
43  
44  
45  
46  
47  
48  
49  
50  
51  
52  
53  
54  
55  
56  
57  
58  
59  
60

For peer review only

Table 3: Medication, doses and frequency encountered for MAID provision by IV medication.

| Description                         | Dose range        | Frequency |
|-------------------------------------|-------------------|-----------|
| <i>Benzodiazepines</i>              |                   |           |
| Benzodiazepine not specified        | PRN               | 14        |
| Diazepam                            | 10-120 mg         | 3         |
| Lorazepam                           | 2.5-5 mg PRN      | 2         |
| Midazolam                           | 2-120 mg, PRN     | 30        |
| <i>Other sedatives</i>              |                   |           |
| Propofol                            | 1000-2000 mg, PRN | 21        |
| Pentobarbital                       | 1-15 g            | 7         |
| Thiopental                          | 1-2 g, 20 mg/kg   | 21        |
| Secobarbital                        | 9 g               | 5         |
| Phenobarbital                       | 3000 mg           | 8         |
| Vesparax                            | Not reported      | 1         |
| Chloral hydrate                     | 35-40 mg          | 1         |
| <i>Neuromuscular blockers</i>       |                   |           |
| Neuromuscular blocker not specified | PRN               | 26        |
| Mivacurium                          | Not reported      | 1         |
| Atracurium                          | 50-100 mg         | 2         |
| Alcuronium                          | 45 g              | 1         |
| Pancuronium, PRN                    | 18-20 mg          | 9         |
| Rocuronium                          | 50-300 mg, PRN    | 17        |
| Cisatracurium                       | 30-40 mg          | 7         |
| Vecuronium                          | 10-60 mg          | 6         |

|                           |               |    |
|---------------------------|---------------|----|
| Curare                    | Not reported  | 3  |
| <i>Opioids</i>            |               |    |
| Opioids NOS               | NA            | 20 |
| Morphine                  | 16 - 480 mg   | 3  |
| Fentanyl                  | 25 - 1500 mcg | 2  |
| <i>Cardiotoxic agents</i> |               |    |
| Potassium chloride        | Not reported  | 3  |
| Bupivacane                | 400 mg        | 2  |
| <i>Local anaesthetics</i> |               |    |
| Lidocaine                 | 40-120 mg     | 20 |
| Magnesium sulphate        | 1000 mg       | 5  |

Table 4: Medication, doses and frequency encountered for MAID provision by oral medication.

| <b>Description</b>           | <b>Dose range</b> | <b>Frequency</b> |
|------------------------------|-------------------|------------------|
| <i>Barbituates</i>           |                   |                  |
| Barbituate not specified     | NA                | 17               |
| Pentobarbital                | 9-15 grams        | 21               |
| Phenobarbital                | 20 grams          | 10               |
| Secobarbital                 | 9-15 grams        | 20               |
| Brallobarbitalum             | Not reported      | 1                |
| Sodium thiopental            | Not reported      | 1                |
| <i>Benzodiazepines</i>       |                   |                  |
| Benzodiazepine not specified | NA                | 6                |
| Diazepam                     | 1 g               | 3                |

|                                                  |                   |    |
|--------------------------------------------------|-------------------|----|
| Lorazepam                                        | 0.25-2 mg PRN, IV | 3  |
| Midazolam                                        | 10 mg, PRN, IV    | 2  |
| <i>Anti-emetics</i>                              |                   |    |
| Anti-emetic not specified                        | NA                | 8  |
| Metoclopramide                                   | 10-20 mg          | 8  |
| Ondansetron                                      | 8 mg              | 5  |
| Haloperidol                                      | 5 mg, PRN         | 2  |
| <i>Miscellaneous sedatives</i>                   |                   |    |
| Chloral hydrate                                  | 20 g              | 5  |
| <i>Cardiotoxic agents</i>                        |                   |    |
| Digoxin                                          | 50 mg             | 3  |
| Propranolol                                      | 2 g               | 3  |
| <i>Opioids</i>                                   |                   |    |
| Morphine                                         | 15 mg- 3g         | 13 |
| Dextropropoxyphene                               | Not reported      | 2  |
| <i>Neuromuscular blocker (for IV backup use)</i> |                   |    |
| Neuromuscular blocker                            | IV, PRN (backup)  | 11 |

1  
2  
3  
4  
5  
6  
7 **Figures**

8  
9 Figure 1: PRISMA study selection flow chart  
10

11  
12  
13  
14 Figure 2: Sample protocols for MAID administration by IV medications, including medications  
15 and dose ranges encountered in the scoping review  
16  
17

18  
19  
20  
21  
22 Figure 3: Sample protocols for MAID administration via oral medications, including medications  
23 and dose ranges encountered in the scoping review  
24  
25  
26  
27  
28  
29  
30  
31  
32  
33  
34  
35  
36  
37  
38  
39  
40  
41  
42  
43  
44  
45  
46  
47  
48  
49  
50  
51  
52  
53  
54  
55  
56  
57  
58  
59  
60

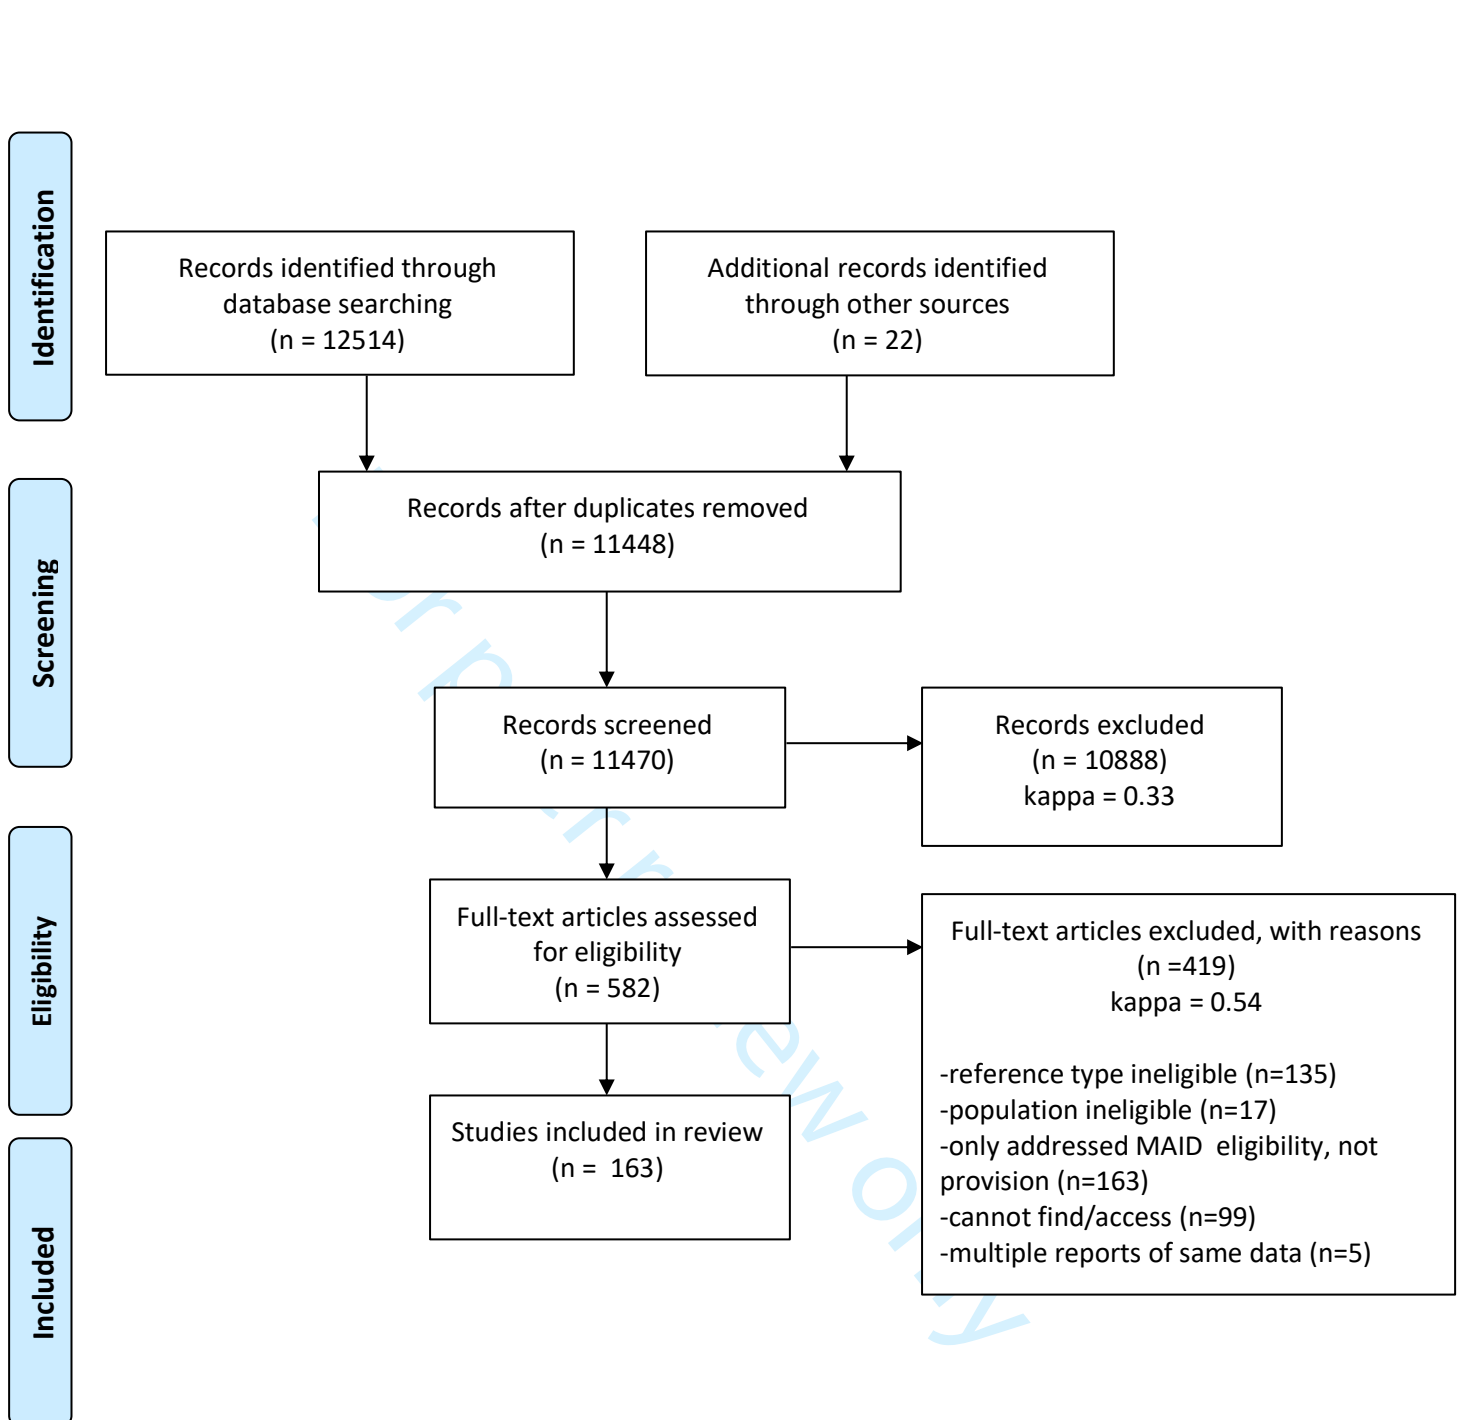

From: Moher D, Liberati A, Tetzlaff J, Altman DG, The PRISMA Group (2009). Preferred Reporting Items for Systematic Reviews and Meta-Analyses: The PRISMA Statement. PLoS Med 6(7): e1000097. doi:10.1371/journal.pmed1000097



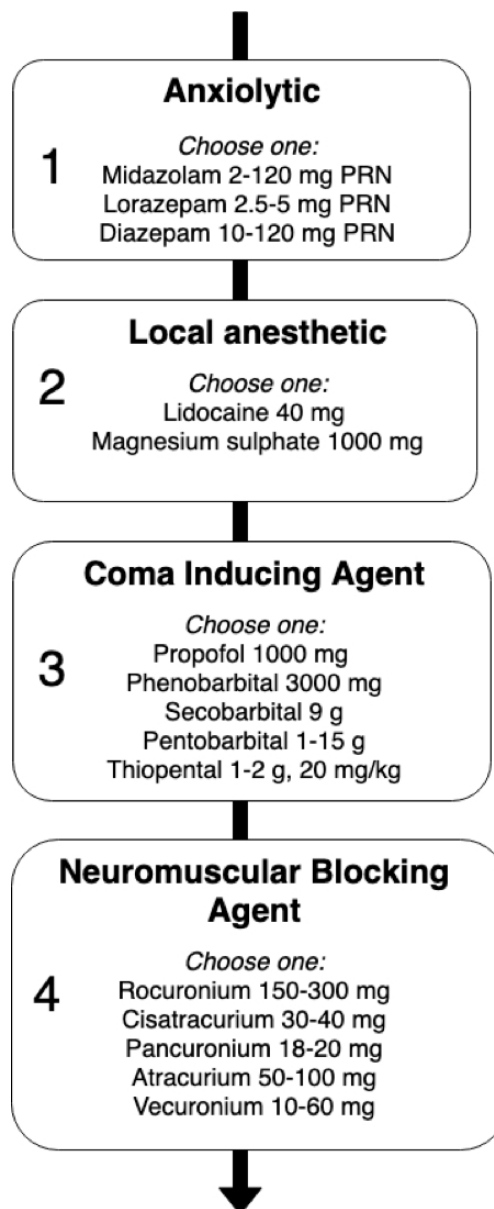

Figure 2: Sample protocols for MAID administration by IV medications, including medications and dose ranges encountered in the scoping review

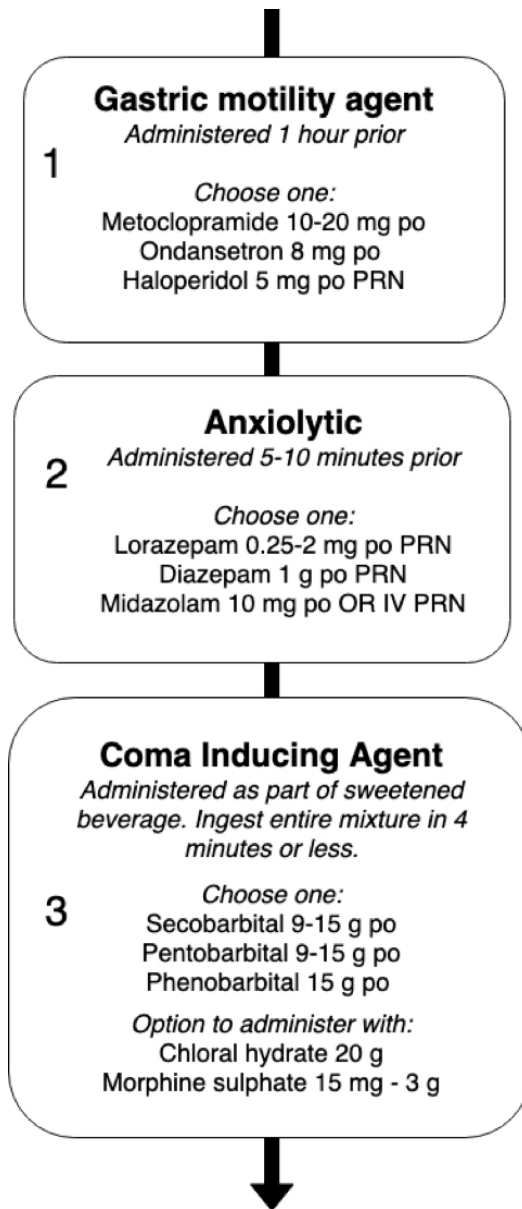

Figure 3: Sample protocols for MAID administration via oral medications, including medications and dose ranges encountered in the scoping review

## Supplementary File 1: MAID scoping review data items

| Report characteristics               | Description                                                                                                                                                                                                                                                                        |
|--------------------------------------|------------------------------------------------------------------------------------------------------------------------------------------------------------------------------------------------------------------------------------------------------------------------------------|
| Type of study                        | Technical report, practice survey, clinical practice guideline, observational study, clinical trial, other (describe)                                                                                                                                                              |
| Journal / Publication location       |                                                                                                                                                                                                                                                                                    |
| Author, year                         | Profession and/or specialization                                                                                                                                                                                                                                                   |
| Origin of report                     | Jurisdiction of report (eg. country, state)                                                                                                                                                                                                                                        |
| Organization                         |                                                                                                                                                                                                                                                                                    |
| Report purpose                       | Stated or inferred                                                                                                                                                                                                                                                                 |
| Report audience                      | Stated or inferred                                                                                                                                                                                                                                                                 |
| MAID provision: medications          | Description                                                                                                                                                                                                                                                                        |
| Pharmaceuticals used – IV protocol   | Each pharmaceutical name, dose, route, frequency, speed of administration, stated or inferred purpose of each medication (eg. anxiolytic, sedation, pain control, antiemetic, paralytic) and frequency of use (optional vs obligatory); alternative medications in case of allergy |
| Pharmaceuticals used – Oral protocol | As above                                                                                                                                                                                                                                                                           |
| Other equipment used                 | If relevant                                                                                                                                                                                                                                                                        |
| Safety checks and documentation      | eg. use of a checklist; confirmation of consent; backup medications available, etc.                                                                                                                                                                                                |
| MAID provision: location             | Description                                                                                                                                                                                                                                                                        |
| Location of MAID provision           | Home, hospital, hospice, other, nursing home, self administration or voluntary euthanasia                                                                                                                                                                                          |
| MAID provision: participants         | Description                                                                                                                                                                                                                                                                        |
| Role of healthcare providers         | Profession, training/expertise, role in assisted dying                                                                                                                                                                                                                             |
| Role of families                     | Training/preparation; follow up care; bereavement care                                                                                                                                                                                                                             |

1  
2  
3  
4  
5  
6  
7  
8  
9  
10  
11  
12  
13  
14  
15  
16  
17  
18  
19  
20  
21  
22  
23  
24  
25  
26  
27  
28  
29  
30  
31  
32  
33  
34  
35  
36  
37  
38  
39  
40  
41  
42  
43  
44  
45  
46  
47  
48  
49  
50  
51  
52  
53  
54  
55  
56  
57  
58  
59  
60

For peer review only

Supplemental file 2: List of studies included in the scoping review

1. The nurse's responsibility to the patient requesting assisted suicide. *Oncologic Nursing Society. Oncol Nurs Forum.* 2001 Apr;28(3):442.
2. Baron CH, Bergstresser C, Brock DW, Cole GF, Dorfman NS, Johnson JA, et al. A model state act to authorize and regulate physician-assisted suicide. *Harvard J Legis.* 1996;33(1):1–34.
3. Boissinot L, Benamou M, Légglise P, Mancret R-C, Huchon-Bécel D. [Euthanasia and / or medically assisted suicide: Reflection on the new responsibility of the hospital pharmacist]. *Ann Pharm Françaises [Internet].* 2014;72(2):82–9. Available from: <http://www.sciencedirect.com/science/article/pii/S0003450913001582>
4. Burette P, Bouüaert C, Vanmeerbeek M, Giet D. Quatre ans d'application de la loi de dépenalisation de l'euthanasie en Belgique. *Press Medicale [Internet].* 2008;37(9):1281–8. Available from: <http://www.sciencedirect.com/science/article/pii/S0755498208000778>
5. Chambaere K, Vander Stichele R, Mortier F, Cohen J, Deliens L. Recent trends in euthanasia and other end-of-life practices in Belgium. *N Engl J Med.* 2015; 372: 1179–81.
6. Chin AE, Hedberg K, Higginson GK, Fleming DW. Legalized physician-assisted suicide in Oregon--the first year's experience. *N Engl J Med.* 1999 Feb;340(7):577–83.
7. de Boer A, Sang Lau H, Porsius A. Physician-assisted death and pharmacy practice in the Netherlands. *N Engl J Med.* 1997 Oct; 337(15):1091–2.
8. Detry O, Laureys S, Faymonville M-E, De Roover A, Squifflet J-P, Lamy M, et al. Organ donation after physician-assisted death. *Transpl Int.* 2008 Sep; 21(9):915.
9. Dierckx de Casterle B, Denier Y, De Bal N, Gastmans C. Nursing care for patients requesting euthanasia in general hospitals in Flanders, Belgium. *J Adv Nurs.* 2010 Nov; 66(11): 2410–20.
10. Enck RE. Physician-assisted dying. *The American Journal of Hospice & Palliative Care.* 2010; 27(7): 441–3.
11. Groenewoud JH, van der Heide A, Onwuteaka-Philipsen BD, Willems DL, van der Maas PJ, van der Wal G. Clinical problems with the performance of euthanasia and physician-assisted suicide in The Netherlands. *N Engl J Med.* 2000 Feb; 342(8): 551–6.
12. Hopkins D, Boss M. Pharmacists' Right to Refuse to Dispense Prescriptions Based on Moral Grounds: A Summary of State Laws and Regulations. *Hosp Pharm [Internet].* 2006 Dec 1;41(12): 1176–9. Available from: <https://doi.org/10.1310/hpj4112-1176>
13. Lewis P. Euthanasia in Belgium five years after legalisation. *Eur J Health Law.* 2009 Jun;16(2):125–38.
14. Loggers ET, Starks H, Shannon-Dudley M, Back AL, Appelbaum FR, Stewart FM. Implementing a Death with Dignity program at a comprehensive cancer center. *N Engl J Med.* 2013 Apr;368(15):1417–24.
15. Meek C. Pharmacy involvement where assisted suicide and euthanasia are permitted. *Pharm J.* 2006;277:614.

16. Meier DE, Emmons CA, Wallenstein S, Quill T, Morrison RS, Cassel CK. A national survey of physician-assisted suicide and euthanasia in the United States. *N Engl J Med*. 1998 Apr;338(17):1193–201.
17. Ogden R. The right to die: a policy proposal for euthanasia and aid in dying. *Can Public Policy*. 1994 Mar;20(1):1–25.
18. Pereira J, Laurent P, Cantin B, Petremand D, Currat T. The response of a Swiss university hospital's palliative care consult team to assisted suicide within the institution. *Palliat Med*. 2008 Jul;22(5):659–67.
19. Rurup ML, Onwuteaka-Philipsen BD, Heide A va. der, Wal G va. der, Maas PJ va. der. [Trends in means used in euthanasia and coherence with it number of notifications]. *Dutch J Med*. 2006;18(150):11.
20. Smith KA, Goy ER, Harvath TA, Ganzini L. Quality of death and dying in patients who request physician-assisted death. *Palliat Med*. 2011 Apr;14(4):445–50.
21. van der Arend AJ. Euthanasia and assisted suicide in The Netherlands: clarifying the practice and the nurse's role. *Int Nurs Rev*. 1998;45(5):145–51.
22. Vander Stichele RH, Bilsen JJR, Bernheim JL, Mortier F, Deliens L. Drugs used for euthanasia in Flanders, Belgium. *Pharmacoepidemiol Drug Saf*. 2004 Feb;13(2):89–95.
23. Werth JLJ, Wineberg H. A critical analysis of criticisms of the Oregon Death with Dignity Act. *Death Stud*. 2005;29(1):1–27.
24. Dierckx de Casterlé B, Verpoort C, De Bal N, Gastmans C. Nurses' views on their involvement in euthanasia: a qualitative study in Flanders (Belgium). *J Med Ethics* [Internet]. 2006 Apr;32(4):187–92. Available from: <https://pubmed.ncbi.nlm.nih.gov/1657486>
25. Asch DA. The role of critical care nurses in euthanasia and assisted suicide. *N Engl J Med*. 1996 May;334(21):1374–9.
26. Benrubi GI. Euthanasia--the need for procedural safeguards. *N Engl J Med*. 1992 Jan;326(3):197–9.
27. Bilsen JJR, Vander Stichele RH, Mortier F, Deliens L. Involvement of nurses in physician-assisted dying. *J Adv Nurs*. 2004 Sep;47(6):583–91.
28. Bosshard G, Fischer S, Bar W. Open regulation and practice in assisted dying. *Swiss Med Wkly*. 2002 Oct;132(37–38):527–34.
29. Bosshard G, Ulrich E, Bar W. 748 cases of suicide assisted by a Swiss right-to-die organisation. *Swiss Med Wkly*. 2003 May;133(21–22):310–7.
30. Chabot BE, Goedhart A. A survey of self-directed dying attended by proxies in the Dutch population. *Soc Sci Med*. 2009 May;68(10):1745–51.
31. De Beer T, Gastmans C, Dierckx de Casterle B. Involvement of nurses in euthanasia: a review of the literature. *J Med Ethics*. 2004 Oct;30(5):494–8.
32. Emanuel EJ, Daniels ER, Fairclough DL, Clarridge BR. The practice of euthanasia and physician-assisted suicide in the United States: adherence to proposed safeguards and effects on physicians. *JAMA*. 1998 Aug;280(6):507–13.

- 1
  - 2
  - 3
  - 4
  - 5
  - 6
  - 7
  - 8
  - 9
  - 10
  - 11
  - 12
  - 13
  - 14
  - 15
  - 16
  - 17
  - 18
  - 19
  - 20
  - 21
  - 22
  - 23
  - 24
  - 25
  - 26
  - 27
  - 28
  - 29
  - 30
  - 31
  - 32
  - 33
  - 34
  - 35
  - 36
  - 37
  - 38
  - 39
  - 40
  - 41
  - 42
  - 43
  - 44
  - 45
  - 46
  - 47
  - 48
  - 49
  - 50
  - 51
  - 52
  - 53
  - 54
  - 55
  - 56
  - 57
  - 58
  - 59
  - 60
33. Ganzini L, Goy ER, Dobscha SK, Prigerson H. Mental health outcomes of family members of Oregonians who request physician aid in dying. *J Pain Symptom Manage*. 2009 Dec;38(6):807–15.
34. Hall JK. Assisted suicide: nurse practitioners as providers? *Nurse Pract*. 1996 Oct;21(10):63-66,71.
35. Hedberg K, Hopkins D, Kohn M. Five years of legal physician-assisted suicide in Oregon. Vol. 348, *The New England journal of medicine*. United States; 2003. p. 961–4.
36. Hedberg K, Hopkins D, Southwick K. Legalized physician-assisted suicide in Oregon, 2001. Vol. 346, *The New England journal of medicine*. United States; 2002. p. 450–2.
37. Inghelbrecht E, Bilsen J, Mortier F, Deliens L. The role of nurses in physician-assisted deaths in Belgium. *CMAJ*. 2010 Jun;182(9):905–10.
38. Lossignol D, Libert I, Michel B, Dumitrescu C, Obiols M, Rosseau C. End of life decision, euthanasia, in a belgian supportive care unit. Abstracts of the 2011 International MASCC/ISOO (Multinational Association of Supportive Care in Cancer/International Society for Oral Oncology) Symposium. June 23-25, 2011. Athens, Greec. *Supportive Care in Cancer*. 2011. 19 (Suppl 2):S67-370.
39. Matzo ML, Emanuel EJ. Oncology nurses' practices of assisted suicide and patient-requested euthanasia. *Oncol Nurs Forum*. 1997;24(10):1725–32.
40. Meier DE, Emmons C-A, Litke A, Wallenstein S, Morrison RS. Characteristics of patients requesting and receiving physician-assisted death. *Arch Intern Med*. 2003 Jul;163(13):1537–42.
41. Naafs NJ. Pharmaceutical care until the end: the role of pharmacists in euthanasia in The Netherlands. *Pharm World Sci*. 2001 Aug;23(4):129–31.
42. O'Brien CN, Madek GA, Ferrera GR. Oregon's guidelines for physician-assisted suicide: a legal and ethical analysis. *Univ Pittsburg Law Rev*. 2000;61(2):329–65.
43. Onwuteaka-Philipsen BD, Muller MT, van der Wal G. Euthanatics: implementation of a protocol to standardise euthanatics among pharmacists and GPs. *Patient Educ Couns*. 1997 Jun;31(2):131–7.
44. Onwuteaka-Philipsen BD, Muller MT, van der Wal G, van Eijk JT, Ribbe MW. Active voluntary euthanasia or physician-assisted suicide? *J Am Geriatr Soc*. 1997 Oct;45(10):1208–13.
45. Onwuteaka-Philipsen BD, Muller MT, van der Wal G, van Eijk JT, Ribbe MW. Attitudes of Dutch general practitioners and nursing home physicians to active voluntary euthanasia and physician-assisted suicide. *Arch Fam Med*. 1995 Nov;4(11):951–5.
46. Onwuteaka-Philipsen BD, van der Wal G. Cases of euthanasia and physician assisted suicide among AIDS patients reported to the Public Prosecutor in North Holland. *Public Health*. 1998 Jan;112(1):53–6.

- 1
- 2
- 3
- 4 47. Rurup ML, Smets T, Cohen J, Bilsen J, Onwuteaka-Philipsen BD, Deliens L. The first
- 5 five years of euthanasia legislation in Belgium and the Netherlands: description and
- 6 comparison of cases. *Palliat Med*. 2012 Jan;26(1):43–9.
- 7
- 8 48. Spencer DE. Practical implications for health care providers in a physician-assisted
- 9 suicide environment. *Seattle Univ law Rev*. 1995;18(3):545–56.
- 10
- 11 49. Swarte NB, Heintz AP. Euthanasia and physician-assisted suicide. *Ann Med*. 1999
- 12 Dec;31(6):364–71.
- 13
- 14 50. Swarte NB, Heintz AP. Guidelines for an acceptable euthanasia procedure. *Best Pract Res*
- 15 *Clin Obstet Gynaecol*. 2001 Apr;15(2):313–21.
- 16
- 17 51. van Bruchem-van de Scheur GG, van der Arend AJG, Spreeuwenberg C, Abu-Saad HH,
- 18 ter Meulen RHJ. Euthanasia and physician-assisted suicide in the Dutch homecare sector:
- 19 the role of the district nurse. *J Adv Nurs*. 2007 Apr;58(1):44–52.
- 20
- 21 52. van de Scheur A, van der Arend A. The role of nurses in euthanasia: a Dutch study. *Nurs*
- 22 *Ethics*. 1998 Nov;5(6):497–508.
- 23
- 24 53. van der Kloot Meijburg HH. How health care institutions in the Netherlands approach
- 25 physician assisted death. *Omega*. 32(3):179–96.
- 26
- 27 54. van der Maas PJ, van der Wal G, Haverkate I, de Graaff CL, Kester JG, Onwuteaka-
- 28 Philipsen BD, et al. Euthanasia, physician-assisted suicide, and other medical practices
- 29 involving the end of life in the Netherlands, 1990-1995. *N Engl J Med*. 1996
- 30 Nov;335(22):1699–705.
- 31
- 32 55. van der Wal G, van Eijk JT, Leenen HJ, Spreeuwenberg C. [The use of drugs for
- 33 euthanasia and assisted suicide in family practice]. *Ned Tijdschr Geneesk*. 1992
- 34 Jul;136(27):1299–305.
- 35
- 36 56. Varadarajan R, Freeman RA, Parmar JR. Aid-in-dying practice in Europe and the United
- 37 States: Legal and ethical perspectives for pharmacy. *Res Social Adm Pharm*. 2016
- 38 Nov;12(6):1016–25.
- 39
- 40 57. Willems DL, Groenewoud JH, van der Wal G. Drugs used in physician-assisted death.
- 41 *Drugs Aging*. 1999 Nov;15(5):335–40.
- 42
- 43 58. Bollen J, de Jongh W, Hagenars J, van Dijk G, Ten Hoopen R, Ysebaert D, et al. Organ
- 44 Donation After Euthanasia: A Dutch Practical Manual. *Am J Transplant*. 2016
- 45 Jul;16(7):1967–72.
- 46
- 47 59. Bilsen J, Bauwens M, Bernheim J, Stichele R Vander, Deliens L. Physician-assisted
- 48 death: attitudes and practices of community pharmacists in East Flanders, Belgium. *Palliat*
- 49 *Med*. 2005 Mar;19(2):151–7.
- 50
- 51 60. Blanke C, LeBlanc M, Hershman D, Ellis L, Meyskens F. Characterizing 18 Years of the
- 52 Death With Dignity Act in Oregon. *JAMA Oncol*. 2017 Oct;3(10):1403–6.
- 53
- 54 61. Boissinot L, Benamou M, Leglise P, Mancret R-C, Huchon-Becel D. [Euthanasia and/or
- 55 medically assisted suicide: Reflection on the new responsibility of the hospital
- 56 pharmacist]. *Ann Pharm Fr*. 2014 Mar;72(2):82–9.
- 57
- 58 62. Bosshard G. [Assisted suicide - medical, legal, and ethical aspects]. *Praxis (Bern 1994)*.
- 59 2012 Feb;101(3):183–9.
- 60



- 1  
2  
3 63. Bosshard G, Zellweger U, Bopp M, Schmid M, Hurst SA, Puhan MA, et al. Medical End-  
4 of-Life Practices in Switzerland: A Comparison of 2001 and 2013. *JAMA Intern Med.*  
5 2016 Apr;176(4):555–6.  
6  
7
- 8  
9 64. Campbell CS, Cox JC. Hospice-assisted death? A study of Oregon hospices on death with  
10 dignity. *Am J Hosp Palliat Care.* 2012 May;29(3):227–35.
- 11 65. Chambaere K, Bilsen J, Cohen J, Onwuteaka-Philipsen BD, Mortier F, Deliens L.  
12 Physician-assisted deaths under the euthanasia law in Belgium: a population-based survey.  
13 *CMAJ.* 2010 Jun;182(9):895–901.  
14
- 15 66. Cohen-Almagor R, Hartman MG. The Oregon Death with Dignity Act: review and  
16 proposals for improvement. *J Legis.* 2001;27(2):269–98.  
17
- 18 67. Crouch BI. Toxicological Issues with Drugs Used to End Life. *J Pharm Care Pain*  
19 *Symptom Control* [Internet]. 1996 Jan 1;4(1–2):211–22. Available from:  
20 [https://doi.org/10.1300/J088v04n01-2\\_04](https://doi.org/10.1300/J088v04n01-2_04)  
21
- 22 68. Dunn P, Reagan B, Tolle SW, Foreman S. The Oregon Death with Dignity Act: A  
23 Guidebook for Health Care Providers, edited by Kathleen Haley and Melinda Lee. The  
24 Task Force to Improve the Care of Terminally-Ill Oregonians. United States; 2008 Jul.
- 25 69. Emanuel EJ, Fairclough D, Clarridge BC, Blum D, Bruera E, Penley WC, et al. Attitudes  
26 and practices of U.S. oncologists regarding euthanasia and physician-assisted suicide. *Ann*  
27 *Intern Med.* 2000 Oct;133(7):527–32.  
28
- 29 70. Emanuel EJ. Euthanasia and physician-assisted suicide: a review of the empirical data  
30 from the United States. *Arch Intern Med.* 2002 Jan;162(2):142–52.  
31
- 32 71. Englert M. Depenalized practice of euthanasia in Belgium: evolution from 2002 to 2005  
33 and interpretation of differences between the North and South of the country. *Med J*  
34 *Brussels.* 2007;28:423–30.  
35
- 36 72. Evrard P. Belgian Modified Classification of Maastricht for Donors After Circulatory  
37 Death on behalf of the Belgian Working Group on DCD National Protocol. In:  
38 *Transplantation Proceedings* [Internet]. Elsevier; 2014. p. 3138–42. Available from:  
39 [http://www.transplantation-proceedings.org/article/S0041-1345\(14\)01019-7/pdf](http://www.transplantation-proceedings.org/article/S0041-1345(14)01019-7/pdf)  
40
- 41 73. Finlay IG, van Dijk B. Euthanasia: the Dutch experience and what it entails in practice.  
42 *Lancet Oncol.* 2002 Mar;3(3):135–6.  
43
- 44 74. Fischer S, Huber CA, Imhof L, Mahrer Imhof R, Furter M, Ziegler SJ, et al. Suicide  
45 assisted by two Swiss right-to-die organisations. *J Med Ethics.* 2008 Nov;34(11):810–4.  
46
- 47 75. de Wachter MAM. Active Euthanasia in the Netherlands. *JAMA* [Internet]. 1989 Dec  
48 15;262(23):3316–9. Available from: <https://doi.org/10.1001/jama.1989.03430230101034>
- 49 76. Hiscox WE. Physician-Assisted Suicide in Oregon: The ‘Death with Dignity’ Data. *Med*  
50 *Law Int* [Internet]. 2007 Sep 1;8(3):197–220. Available from:  
51 <https://doi.org/10.1177/096853320700800301>  
52
- 53 77. Horikx A, Admiraal P V. [Utilization of euthanatic agents; experience of physicians with  
54 227 patients, 1998-2000]. *Ned Tijdschr Geneeskd.* 2000 Dec;144(52):2497–500.  
55  
56  
57  
58  
59

- 1
  - 2
  - 3
  - 4
  - 5
  - 6
  - 7
  - 8
  - 9
  - 10
  - 11
  - 12
  - 13
  - 14
  - 15
  - 16
  - 17
  - 18
  - 19
  - 20
  - 21
  - 22
  - 23
  - 24
  - 25
  - 26
  - 27
  - 28
  - 29
  - 30
  - 31
  - 32
  - 33
  - 34
  - 35
  - 36
  - 37
  - 38
  - 39
  - 40
  - 41
  - 42
  - 43
  - 44
  - 45
  - 46
  - 47
  - 48
  - 49
  - 50
  - 51
  - 52
  - 53
  - 54
  - 55
  - 56
  - 57
  - 58
  - 59
  - 60
78. Inghelbrecht E, Bilsen J, Mortier F, Deliëns L. Factors related to the involvement of nurses in medical end-of-life decisions in Belgium: a death certificate study. *Int J Nurs Stud*. 2008 Jul;45(7):1022–31.
79. Jamison S. When Drugs Fail: Assisted Deaths and Not-So-Lethal Drugs. *J Pharm Care Pain Symptom Control* [Internet]. 1996 Jan 1;4(1–2):223–43. Available from: [https://doi.org/10.1300/J088v04n01-2\\_05](https://doi.org/10.1300/J088v04n01-2_05)
80. Kimsma GK. Euthanasia and Euthanizing Drugs in The Netherlands. *J Pharm Care Pain Symptom Control* [Internet]. 1996 Jan 1;4(1–2):193–210. Available from: [https://doi.org/10.1300/J088v04n01-2\\_03](https://doi.org/10.1300/J088v04n01-2_03)
81. Kompanje EJO, de Beaufort ID, Bakker J. Euthanasia in intensive care: a 56-year-old man with a pontine hemorrhage resulting in a locked-in syndrome. *Crit Care Med*. 2007 Oct;35(10):2428–30.
82. Lalmohamed A, Horikx A. [Experience with euthanasia since 2007. Analysis of problems with execution]. Vol. 154, *Nederlands tijdschrift voor geneeskunde*. 2010. A1882 p.
83. Lau HS, Riezebos J, Abas V, Porsius AJ, De Boer A. A nation-wide study on the practice of euthanasia and physician-assisted suicide in community and hospital pharmacies in The Netherlands. *Pharm World Sci*. 2000 Feb;22(1):3–9.
84. Lemiengre J, Dierckx de Casterle B, Denier Y, Schotsmans P, Gastmans C. How do hospitals deal with euthanasia requests in Flanders (Belgium)? A content analysis of policy documents. *Patient Educ Couns*. 2008 May;71(2):293–301.
85. Lossignol D. [Euthanasia: medications and medical procedures]. *Rev Med Brux*. 2008 Sep;29(4):435–40.
86. Oregon Nurses Association. Guidelines on the nurse's role related to the death with dignity act. 2001.
87. Pasma HRW, Wolf JEH, Hesselink BAM, van der Heide A, van der Wal G, van der Maas PJ, et al. Policy statements and practice guidelines for medical end-of-life decisions in Dutch health care institutions: developments in the past decade. *Health Policy*. 2009 Sep;92(1):79–88.
88. Penneç S, Riou F, Gaymu J, Pontone S, Aubry R. Physician-assisted deaths in France: results from a nationwide survey. *Presse Med*. 2015;44(7–8):864–7.
89. Rietjens JAC, van Delden JJM, van der Heide A, Vrakking AM, Onwuteaka-Philipsen BD, van der Maas PJ, et al. Terminal sedation and euthanasia: a comparison of clinical practices. *Arch Intern Med*. 2006 Apr;166(7):749–53.
90. Rietjens JAC, van der Maas PJ, Onwuteaka-Philipsen BD, van Delden JJM, van der Heide A. Two Decades of Research on Euthanasia from the Netherlands. What Have We Learnt and What Questions Remain? *J Bioeth Inq*. 2009 Sep;6(3):271–83.
91. Schildmann J, Hoetzel J, Mueller-Busch C, Vollmann J. End-of-life practices in palliative care: a cross sectional survey of physician members of the German Society for Palliative Medicine. *Palliat Med*. 2010 Dec;24(8):820–7.

- 1  
2  
3 92. Smets T, Bilsen J, Cohen J, Rurup ML, De Keyser E, Deliens L. The medical practice of  
4 euthanasia in Belgium and The Netherlands: legal notification, control and evaluation  
5 procedures. *Health Policy*. 2009 May;90(2–3):181–7.  
6
- 7 93. Smets T, Bilsen J, Cohen J, Rurup ML, Deliens L. Legal euthanasia in Belgium:  
8 characteristics of all reported euthanasia cases. *Med Care*. 2010 Feb;48(2):187–92.  
9
- 10 94. Smets T, Bilsen J, Cohen J, Rurup ML, Mortier F, Deliens L. Reporting of euthanasia in  
11 medical practice in Flanders, Belgium: cross sectional analysis of reported and unreported  
12 cases. *BMJ*. 2010 Oct;341:c5174.  
13
- 14 95. Smets T, Bilsen J, Van den Block L, Cohen J, Van Casteren V, Deliens L. Euthanasia in  
15 patients dying at home in Belgium: interview study on adherence to legal safeguards. *Br J*  
16 *Gen Pract*. 2010 Apr;60(573):e163–70.  
17
- 18 96. Sprij B. [Could it be a little less? Let the dose of thiopental in euthanasia depend on the  
19 body weight]. *Ned Tijdschr Geneeskd*. 2010;154(43).
- 20 97. Thienpont L, Verhofstadt M, Van Loon T, Distelmans W, Audenaert K, De Deyn PP.  
21 Euthanasia requests, procedures and outcomes for 100 Belgian patients suffering from  
22 psychiatric disorders: a retrospective, descriptive study. *BMJ Open*. 2015  
23 Jul;5(7):e007454.  
24
- 25 98. van Bruchem-van de Scheur GG, van der Arend AJG, Huijjer Abu-Saad H, van Wijmen  
26 FCB, Spreeuwenberg C, Ter Meulen RHJ. Euthanasia and assisted suicide in Dutch  
27 hospitals: the role of nurses. *J Clin Nurs*. 2008 Jun;17(12):1618–26.  
28
- 29 99. van Bruchem-van de Scheur GAG, van der Arend AJG, Abu-Saad HH, van Wijmen FCB,  
30 Spreeuwenberg C, ter Meulen RHJ. Alleviation of pain and symptoms with a life-  
31 shortening intention. *Nurs Ethics*. 2008 Sep;15(5):682–95.  
32
- 33 100. van der Heide A, Onwuteaka-Philipsen B, Rurup M, Buiting H, van Delden J, Hanssen-de  
34 Wolf J, et al. Medical decisions regarding the end of life in the Netherlands after the  
35 Euthanasia Act came into force; fourth national survey. *Dutch J Med*. 2007;151:1635–42.  
36
- 37 101. van der Heide A, Onwuteaka-Philipsen BD, Rurup ML, Buiting HM, van Delden JJM,  
38 Hanssen-de Wolf JE, et al. End-of-life practices in the Netherlands under the Euthanasia  
39 Act. *N Engl J Med*. 2007 May;356(19):1957–65.  
40
- 41 102. van Heest FB, Finlay IG, Kramer JJE, Otter R, Meyboom-de Jong B. Telephone  
42 consultations on palliative sedation therapy and euthanasia in general practice in The  
43 Netherlands in 2003: a report from inside. *Fam Pract*. 2009 Dec;26(6):481–7.  
44
- 45 103. van Marwijk H, Haverkate I, van Royen P, The A-M. Impact of euthanasia on primary  
46 care physicians in the Netherlands. *Palliat Med*. 2007 Oct;21(7):609–14.  
47
- 48 104. Wineberg H. Oregon's Death with Dignity Act: fourteen months and counting. *Arch*  
49 *Intern Med*. 2000 Jan;160(1):21–3.
- 50 105. Ziegler SJ, Bosshard G. Role of non-governmental organisations in physician assisted  
51 suicide. *BMJ*. 2007 Feb;334(7588):295–8.  
52
- 53 106. Medical Assistance in Dying: Parenteral Pharmacologic Recommendations. *Health PEI*;  
54 2016.  
55  
56  
57  
58  
59  
60

107. KNMG/KNMP Guidelines for the practice of Euthanasia and Physician-Assisted Suicide 2012. <https://www.knmg.nl/web/file?uuid=c56c038c-ffcd-486e-a77407f7de104f94&owner=5c945405-d6ca-4deb-aa16-7af2088aa173&contentid=223&elementid=2003770>. Accessed June 2017.
108. Euthanasia: a “kit” sold in Belgian pharmacies. *Prescrire Int.* 2005 Oct;14(79):197.
109. Assistance in Dying Oversight Group (February 8 2016). *Assistance in Dying - P&P INT*. Unpublished internal document, Trillium Health Partners.
110. Author unknown (2017). *UHN Information for MAID Intervention*. Unpublished internal document, University Health Network.
111. Author unknown (April 2016). *Physician’s Orders, Medical Assistance in Dying (MAID)*. Unpublished internal document, The Ottawa Hospital/L’Hopital d’Ottawa
112. Author unknown (June 2017). *Medication protocol for MAID*. Unpublished Internal document. Southlake Regional Health Centre.
113. Author unknown. (June 2016) *Medication protocol for MAID*. Unpublished Internal document. Oakville Trafalgar Memorial Hospital.
114. Author Unknown. (June 2016). *Medical Assistance in Dying (MAID) - Physician Administered IV Protocol*. Unpublished Internal Document. Nova Scotia Health Authority
115. Author Unknown. (April 2017) *Prescription for medical Assistance in Dying (MAID), Physician or Nurse Practitioner-Administered*. Unpublished internal document. Vitalité Health Network and Horizon Health Network.
116. Author unknown. (2016) *Medical assistance in dying order set*. Unpublished Internal Document, Kingston General Hospital.
117. Author unknown. (November 29 2016) *MAiD (Medical Aid in Dying) Prescription*. Unpublished internal document, Brockville General Hospital.
118. Author unknown. (February 8, 2018). *British Columbia Medical Assistance in Dying Prescription*. Unpublished internal document, British Columbia Ministry of Health.
119. Author unknown. (July 9, 2019). *Medical Assistance in Dying Medication Protocols*. Unpublished internal document, Alberta Health Services, Alberta College of Pharmacists, College of Physicians and Surgeons of Alberta College and Association of Registered Nurses of Alberta.

- 1  
2  
3 120. Author unknown. (June 2017) *Standardized Prescription for Medical Assistance in Dying (MAID) in Manitoba*. Unpublished internal document, The Manitoba Provincial Medical  
4 Assistance in Dying Clinical Team.  
5  
6
- 7  
8 121. Author unknown. (November 2018). *MAID medication prescription*. Unpublished  
9 internal document. Brantford, Ontario  
10
- 11 122. Author unknown. (April 2017) *Medical Prescription*. Unpublished internal  
12 document. Collège des médecins du Québec.  
13
- 14 123. Author unknown. (July 2016). *Prescription protocol for practitioner-administered*  
15 *medical assistance in dying (injection)*. Unpublished internal document, Government of  
16 Saskatchewan.  
17
- 18 124. Borgsteede SD, Rhodius CA, De Smet PAGM, Pasman HRW, Onwuteaka-Philipsen BD,  
19 Rurup ML. The use of opioids at the end of life: knowledge level of pharmacists and  
20 cooperation with physicians. *Eur J Clin Pharmacol*. 2011;67(1):79–89.  
21
- 22 125. Bosshard G, Broeckaert B, Clark D, Materstvedt LJ, Gordijn B, Müller-Busch HC. A role  
23 for doctors in assisted dying? An analysis of legal regulations and medical professional  
24 positions in six European countries. *J Med Ethics*. 2008;34(1):28–32.  
25
- 26 126. Burkhardt S, Macias A, Jousset N, La Harpe R. Assisted suicide: experiences and debates  
27 in switzerland. *Med Droit*. 2015;155–60.  
28
- 29 127. Campbell CS, Black MA. Dignity, death, and dilemmas: a study of Washington hospices  
30 and physician-assisted death. *J Pain Symptom Manage*. 2014 Jan;47(1):137–53.  
31
- 32 128. De Casterlé BD, Verpoort C, De Bal N, Gastmans C. Nurses' views on their involvement  
33 in euthanasia: a qualitative study in Flanders (Belgium). *J Med Ethics*. 2006;32(4):187–  
34 92.  
35
- 36 129. Dees MK, Vernooij-Dassen MJ, Dekkers WJ, Elwyn G, Vissers KC, van Weel C.  
37 Perspectives of decision-making in requests for euthanasia: a qualitative research among  
38 patients, relatives and treating physicians in the Netherlands. *Palliat Med*. 2013  
39 Jan;27(1):27–37.  
40
- 41 130. Dierickx S, Deliens L, Cohen J, Chambaere K. Involvement of Palliative Care in People  
42 Receiving Euthanasia. In: Abstracts of the 9th World Research Congress of the European  
43 Association for Palliative Care (EAPC). 2016.  
44
- 45 131. Fass J, Fass A. Physician-assisted suicide: ongoing challenges for pharmacists. *Am J*  
46 *Health Syst Pharm*. 2011 May;68(9):846–9.  
47
- 48 132. Francke AL, Albers G, Bilsen J, de Veer AJE, Onwuteaka-Philipsen BD. Nursing staff  
49 and euthanasia in the Netherlands. A nation-wide survey on attitudes and involvement in  
50 decision making and the performance of euthanasia. *Patient Educ Couns*. 2016;99(5):783–  
51 9.  
52
- 53 133. Grube D. Oregon: Aid in Dying - Drug Protocol - Chloral Hydrate, Phenobarbital and  
54 Morphine. 2014.  
55  
56  
57  
58  
59

- 1  
2  
3 134. Hedberg K, Hopkins D, Leman R, Kohn M. The 10-year experience of Oregon's Death  
4 with Dignity Act: 1998-2007. *J Clin Ethics*. 2009;20(124–32).  
5  
6 135. Hesselink BAM, Onwuteaka-Philipsen BD, Janssen A, Buiting HM, Kollau M, Rietjens  
7 JAC, et al. Do guidelines on euthanasia and physician-assisted suicide in Dutch hospitals  
8 and nursing homes reflect the law? A content analysis. *J Med Ethics*. 2012;38(1):35–42.  
9  
10 136. Hicks MH-R. Physician-assisted suicide: a review of the literature concerning practical  
11 and clinical implications for UK doctors. *BMC Fam Pract*. 2006;7(1):39.  
12  
13 137. Lemiengre J, De Casterlé BD, Denier Y, Schotsmans P, Gastmans C. Content analysis of  
14 euthanasia policies of nursing homes in Flanders (Belgium). *Med Heal Care Philos*.  
15 2009;12(3):313–22.  
16  
17 138. Ministerio de Salud. Protocolo para la aplicación del procedimiento de eutanasia en  
18 Colombia [Internet]. 2015. Available from:  
19 [https://www.minsalud.gov.co/sites/rid/Lists/Biblioteca-Digital/RIDE/DE/CA/Protocolo-](https://www.minsalud.gov.co/sites/rid/Lists/Biblioteca-Digital/RIDE/DE/CA/Protocolo-aplicacion-procedimiento-eutanasia-colombia.pdf)  
20 [aplicacion-procedimiento-eutanasia-colombia.pdf](https://www.minsalud.gov.co/sites/rid/Lists/Biblioteca-Digital/RIDE/DE/CA/Protocolo-aplicacion-procedimiento-eutanasia-colombia.pdf). Accessed June 2017.  
21  
22 139. Ogden RD, Hamilton WK, Whitcher C. Assisted suicide by oxygen deprivation with  
23 helium at a Swiss right-to-die organisation. *J Med Ethics*. 2010;36(3):174–9.  
24  
25 140. Onwuteaka-Philipsen BD, Brinkman-Stoppelenburg A, Penning C, de Jong-Krul GJF, van  
26 Delden JJM, van der Heide A. Trends in end-of-life practices before and after the  
27 enactment of the euthanasia law in the Netherlands from 1990 to 2010: a repeated cross-  
28 sectional survey. *Lancet*. 2012;380(9845):908–15.  
29  
30 141. Smets T, Bilsen J, Cohen J, Rurup ML, Mortier F, Deliens L. Medical decisions at the end  
31 of life in flanders, Belgium - A nationwide post-mortem survey of euthanasia cases  
32 reported and unreported to the federal review committee. *Palliat Med*. 2010;24(4):S46.  
33  
34 142. Sullivan AD, Hedberg K, Fleming DW. Legalized Physician-Assisted Suicide in Oregon -  
35 The Second Year. *N Engl J Med* [Internet]. 2000 Feb 24;342(8):598–604. Available from:  
36 <https://doi.org/10.1056/NEJM200002243420822>  
37  
38 143. Wang LH, Elliott MA, Jung Henson L, Gerena-Maldonado E, Strom S, Downing S, et al.  
39 Death with dignity in Washington patients with amyotrophic lateral sclerosis. *Neurology*.  
40 2016 Nov;87(20):2117–22.  
41  
42 144. Washington State Department of Health. Death with Dignity Act Report Executive  
43 Summary. [Internet]. 2015. Available from:  
44 [http://www.doh.wa.gov/portals/1/Documents/Pubs/422-109-](http://www.doh.wa.gov/portals/1/Documents/Pubs/422-109-DeathWithDignityAct2015.pdf)  
45 [DeathWithDignityAct2015.pdf](http://www.doh.wa.gov/portals/1/Documents/Pubs/422-109-DeathWithDignityAct2015.pdf) . Accessed June 2017.  
46  
47 145. Weiss E, Downar J, editors. Ontario Maid Provider Handbook. [Internet]. Ontario College  
48 of Family Physicians Collaborative Mentoring Networks; 2018. Available from:  
49 <https://www.ontariofamilyphysicians.ca/files/maid-handbook-0-2-2018-august-2.pdf>.  
50  
51 146. Ysebaert D, Detry O, Verfailli G, Mikhalski D, Van Raemdonck D. Abstracts of the 17th  
52 Congress of the European Society for Organ Transplantation 13 - 16 September 2015,  
53 Brussels, Belgium. *Transpl Int*. 2015 Nov;28 Suppl 4:1–856.  
54  
55 147. Emanuel EJ, Onwuteaka-Philipsen BD, Urwin JW, Cohen J. Attitudes and Practices of  
56 Euthanasia and Physician-Assisted Suicide in the United States, Canada, and Europe.  
57 *JAMA*. 2016 Jul;316(1):79–90.  
58  
59  
60

- 1  
2  
3  
4  
5  
6  
7  
8  
9  
10  
11  
12  
13  
14  
15  
16  
17  
18  
19  
20  
21  
22  
23  
24  
25  
26  
27  
28  
29  
30  
31  
32  
33  
34  
35  
36  
37  
38  
39  
40  
41  
42  
43  
44  
45  
46  
47  
48  
49  
50  
51  
52  
53  
54  
55  
56  
57  
58  
59  
60
148. Al Rabadi L, LeBlanc M, Bucy T, Ellis LM, Hershman DL, Meyskens Jr FL, et al. Trends in Medical Aid in Dying in Oregon and Washington. *JAMA Netw Open* [Internet]. 2019 Aug 9;2(8):e198648–e198648. Available from: <https://doi.org/10.1001/jamanetworkopen.2019.8648>
  149. Ball IM, Hodge B, Jansen S, Nickle S, Sibbald RW. A Canadian Academic Hospital's Initial MAID Experience: A Health-Care Systems Review. *J Palliat Care*. 2019 Apr;34(2):78–84.
  150. Beardsley C, Brown K, Sandroussi C. Euthanasia and surgeons: an overview of the Victorian Voluntary Assisted Dying Act 2017 and its relevance to surgical practice in Australia. *ANZ J Surg*. 2018 Oct;88(10):956–8.
  151. Blanke CD, Leblanc M, Hershman D, Meyskens F, Taylor L, Ellis LM. Medical-aid-in-dying use in the US Pacific Northwest. *Ann Oncol* [Internet]. 2018 Oct 1;29:viii555–6. Available from: <https://doi.org/10.1093/annonc/mdy295.026>
  152. Buchbinder M, Ojo E, Knio L, Brassfield ER. Caregivers' Experiences With Medical Aid-In-Dying in Vermont: A Qualitative Study. *J Pain Symptom Manage*. 2018 Dec;56(6):936–43.
  153. Dierickx S, Cohen J, Vander Stichele R, Deliens L, Chambaere K. Drugs Used for Euthanasia: A Repeated Population-Based Mortality Follow-Back Study in Flanders, Belgium, 1998-2013. *J Pain Symptom Manage*. 2018 Oct;56(4):551–9.
  154. Dierickx S, Deliens L, Cohen J, Chambaere K. Involvement of palliative care in euthanasia practice in a context of legalized euthanasia: A population-based mortality follow-back study. *Palliat Med*. 2018 Jan;32(1):114–22.
  155. Hales BM, Bean S, Isenberg-Grzeda E, Ford B, Selby D. Improving the Medical Assistance in Dying (MAID) process: A qualitative study of family caregiver perspectives. *Palliat Support Care*. 2019 Oct;17(5):590–5.
  156. Harty C, Chaput AJ, Trouton K, Buna D, Naik VN. Oral medical assistance in dying (MAiD): informing practice to enhance utilization in Canada. *Can J Anaesth*. 2019 Sep;66(9):1106–12.
  157. Hedberg K, New C. Oregon's Death With Dignity Act: 20 Years of Experience to Inform the Debate. *Ann Intern Med*. 2017 Sep 19;167.
  158. Hughes MT. The pharmacist and medical aid in dying. *Am J Heal Pharm* [Internet]. 2017 Aug 15;74(16):1253–60. Available from: <https://doi.org/10.2146/ajhp170122>
  159. Hurst SA, Zellweger U, Bosshard G, Bopp M. Medical end-of-life practices in Swiss cultural regions: a death certificate study. *BMC medicine*. 2018 Dec;16(1):54. Available from: <https://doi.org/10.1186/s12916-018-1043-5>
  160. Li M, Watt S, Escaf M, Gardam M, Heesters A, O'Leary G, et al. Medical Assistance in Dying — Implementing a Hospital-Based Program in Canada. *N Engl J Med* [Internet]. 2017 May 24;376(21):2082–8. Available from: <https://doi.org/10.1056/NEJMms1700606>
  161. Riley SR, Overbeek A, van der Heide A. Physician adherence to clinical guidelines in euthanasia and assisted suicide in the Netherlands: a qualitative study. *Fam Pract*. 2019 Nov;

- 1  
2  
3 162. Silvius JL, Memon A, Arain M. Medical Assistance in Dying: Alberta Approach and  
4 Policy Analysis. *Can J Aging*. 2019 Sep;38(3):397–406.  
5  
6 163. Wang DH. No Easy Way Out: A Case of Physician-Assisted Dying in the Emergency  
7 Department. *Ann Emerg Med* [Internet]. 2018 Aug 1;72(2):206–10. Available from:  
8 <https://doi.org/10.1016/j.annemergmed.2017.08.056>  
9  
10  
11  
12  
13  
14  
15  
16  
17  
18  
19  
20  
21  
22  
23  
24  
25  
26  
27  
28  
29  
30  
31  
32  
33  
34  
35  
36  
37  
38  
39  
40  
41  
42  
43  
44  
45  
46  
47  
48  
49  
50  
51  
52  
53  
54  
55  
56  
57  
58  
59  
60



## Supplemental file 3: Sources of evidences and data extracted

| <b>Author</b>                               | <b>Type of Study/Report Type</b> | <b>Year</b> | <b>Country</b> | <b>Protocol Described</b> | <b>Location of MAID Provision</b> |
|---------------------------------------------|----------------------------------|-------------|----------------|---------------------------|-----------------------------------|
| Oncology Nursing Society Board of Directors | Position Statement               | 2001        | USA            | Not specified             | Not specified                     |
| Baron et al.                                | Review                           | 1996        | USA            | Not specified             | Not specified                     |
| Boissinot et al.                            | Review                           | 2014        | France         | IV and Oral               | Hospital                          |
| Burette et al.                              | Review                           | 2008        | Belgium        | IV and Oral               | Home, hospital, hospice           |
| Chambaere et al.                            | Survey                           | 2015        | Belgium        | Not specified             | Not specified                     |
| Chin et al.                                 | Cohort study                     | 1999        | USA            | Not specified             | Not specified                     |
| De Boer et al.                              | Survey                           | 1997        | Netherlands    | IV and Oral               | Not specified                     |
| Detry et al.                                | Case Report                      | 2008        | Belgium        | Not specified             | Hospital                          |
| de Casterle et al.                          | Qualitative study                | 2010        | Belgium        | Not specified             | Hospital                          |
| Enck                                        | Review                           | 2010        | Belgium        | Not specified             | Home                              |
| Groenewoud et al.                           | Qualitative study                | 2000        | Netherlands    | IV                        | Not specified                     |
| Hopkins & Boss                              | Cross-Sectional study            | 2006        | USA            | Not specified             | Not specified                     |
| Lewis                                       | Review                           | 2009        | Belgium        | IV and Oral               | Hospital (50%), Home, (45%)       |
| Loggers et al                               | Review                           | 2013        | USA            | Oral                      | Home, hospice                     |
| Meek                                        | Review                           | 2006        | Multi-region   | Not specified             | Not specified                     |
| Meier et al.                                | Survey                           | 1998        | USA            | IV                        | Not specified                     |
| Ogden                                       | Review                           | 1994        | Canada         | Not specified             | Not specified                     |
| Pereira et al.                              | Review                           | 2008        | Switzerland    | Not specified             | Hospital or NGO Headquarters      |
| Rurup et al.                                | Cross-sectional study            | 2006        | Netherlands    | IV                        | Not specified                     |

|                                            |                       |      |                                                                   |               |                                                                                 |
|--------------------------------------------|-----------------------|------|-------------------------------------------------------------------|---------------|---------------------------------------------------------------------------------|
| Smith et al.                               | Cross-sectional study | 2011 | USA                                                               | Not specified | Home, hospice                                                                   |
| van der Arend                              | Review                | 1998 | Netherlands                                                       | Not specified | Not specified                                                                   |
| Vander Stichele et al.                     | Survey                | 2004 | Belgium                                                           | IV            | Home, Hospital                                                                  |
| Werth & Wineberg                           | Review                | 2005 | USA                                                               | Oral          | Home, Nursing home, Hospital                                                    |
| Netherlands State Commission on Euthanasia | Review                | 1987 | Netherlands                                                       | Not specified | Not specified                                                                   |
| Asch                                       | Review                | 1996 | USA                                                               | Not specified | Not specified                                                                   |
| Benrubi                                    | Review                | 1992 | Netherlands                                                       | Not specified | Not specified                                                                   |
| Bilsen et al.                              | Survey                | 2004 | Belgium                                                           | Not specified | Institution, Home                                                               |
| Bosshard et al.                            | Review                | 2002 | Multi-region (The Netherlands, Oregon, and Switzerland)           | Not specified | Not specified                                                                   |
| Bosshard et al.                            | Cohort study          | 2003 | Switzerland                                                       | IV and Oral   | Not specified                                                                   |
| Chabot & Goedhart                          | Survey                | 2009 | Netherlands                                                       | Not specified | Home                                                                            |
| De Beer et al.                             | Systematic review     | 2004 | Multi-region (The Netherlands, Australia, Belgium, Japan, Oregon) | Not specified | Not specified                                                                   |
| Emanuel et al.                             | Survey                | 1998 | USA                                                               | IV            | Not specified                                                                   |
| Ganzini et al.                             | Survey                | 2009 | USA                                                               | Not specified | Not specified                                                                   |
| Hall                                       | Review                | 1996 | USA                                                               | Not specified | Not specified                                                                   |
| Hedberg et al.                             | Cohort study          | 2003 | USA                                                               | IV            | Home (94%), Long-term care, assisted living, or foster care (5%), hospital (1%) |

|                                   |                   |      |                                        |               |                              |
|-----------------------------------|-------------------|------|----------------------------------------|---------------|------------------------------|
| Hedberg et al.                    | Cohort study      | 2002 | USA                                    | IV            | Home, Hospital               |
| Inghelbrecht et al.               | Survey            | 2010 | Belgium                                | IV            | Not specified                |
| Lossignol et al.                  | Cohort study      | 2011 | Belgium                                | IV            | Hospital                     |
| Matzo & Emanuel                   | Survey            | 1997 | USA                                    | Not specified | Not specified                |
| Meier et al.                      | Survey            | 2003 | USA                                    | Not specified | Home                         |
| Naafs                             | Review            | 2001 | Netherlands                            | Not specified | Not specified                |
| O'Brien et al.                    | Review            | 2000 | USA                                    | Not specified | Not specified                |
| Onwuteaka-Philipsen et al.        | Survey            | 1997 | Netherlands                            | IV            | Not specified                |
| Onwuteaka-Philipsen et al.        | Survey            | 1997 | Netherlands                            | Not specified | Not specified                |
| Onwuteaka-Philipsen et al.        | Survey            | 1995 | Netherlands                            | Not specified | Not specified                |
| Onwuteaka-Philipsen & van der Wal | Cohort study      | 1998 | Netherlands                            | Not specified | Home, Hospital, Nursing Home |
| Rurup et al.                      | Cohort study      | 2012 | Multi-region (Belgium and Netherlands) | Not specified | Home, Hospital               |
| Spencer                           | Review            | 1995 | USA                                    | Not specified | Not specified                |
| Swarte & Heintz                   | Review            | 1999 | Netherlands                            | IV and Oral   | Not specified                |
| Swarte & Heintz                   | Review            | 2001 | Netherlands                            | IV and Oral   | Not specified                |
| van Bruchem-van de Scheur et al.  | Survey            | 2007 | Netherlands                            | Not specified | Not specified                |
| van de Scheur & van der Arend     | Qualitative study | 1998 | Netherlands                            | Not specified | Not specified                |
| Van Der Kloot Meijburg            | Review            | 1995 | Netherlands                            | Not specified | Not specified                |
| Van Der Maas et al.               | Survey            | 1996 | Netherlands                            | Not specified | Not specified                |

|    |                         |                    |      |                                             |               |                               |
|----|-------------------------|--------------------|------|---------------------------------------------|---------------|-------------------------------|
| 1  | Van Der Wal et al       | Survey             | 1992 | Netherlands                                 | IV and Oral   | Not specified                 |
| 2  |                         |                    |      |                                             |               |                               |
| 3  | Varadarajan et al.      | Review             | 2016 | Multi-region (Europe and USA)               | IV and Oral   | Not specified                 |
| 4  |                         |                    |      |                                             |               |                               |
| 5  | Willems et al.          | Review             | 1999 | Netherlands                                 | IV and Oral   | Not specified                 |
| 6  |                         |                    |      |                                             |               |                               |
| 7  | Bollen et al.           | Practical Manual   | 2016 | Netherlands                                 | IV            | Hospital                      |
| 8  |                         |                    |      |                                             |               |                               |
| 9  | Bilsen et al.           | Survey             | 2005 | Belgium                                     | Not specified | Not specified                 |
| 10 |                         |                    |      |                                             |               |                               |
| 11 | Blanke et al.           | Cohort study       | 2017 | USA                                         | IV            | Long-term care facility       |
| 12 |                         |                    |      |                                             |               |                               |
| 13 | Boissinota et al.       | Review             | 2014 | Multi-region (European Union Member States) | IV and Oral   | Not specified                 |
| 14 |                         |                    |      |                                             |               |                               |
| 15 | Bosshard                | Review             | 2012 | Switzerland                                 | IV and Oral   | Nursing home, Hospital        |
| 16 |                         |                    |      |                                             |               |                               |
| 17 | Bosshard et al.         | Survey             | 2016 | Switzerland                                 | Not specified | Not specified                 |
| 18 |                         |                    |      |                                             |               |                               |
| 19 | Campbell & Cox          | Review             | 2012 | USA                                         | Not specified | Not specified                 |
| 20 |                         |                    |      |                                             |               |                               |
| 21 | Chambaere et al.        | Survey             | 2010 | Belgium                                     | IV and Oral   | Home, Hospital, Care home     |
| 22 |                         |                    |      |                                             |               |                               |
| 23 | Cohen-Almagor & Hartman | Review             | 2001 | USA                                         | Not specified | Not specified                 |
| 24 |                         |                    |      |                                             |               |                               |
| 25 | Crouch                  | Review             | 1996 | USA                                         | IV            | Not specified                 |
| 26 |                         |                    |      |                                             |               |                               |
| 27 | Dunn et al.             | Guideline          | 2008 | USA                                         | Not specified | Not specified                 |
| 28 |                         |                    |      |                                             |               |                               |
| 29 | Emanuel et al.          | Survey             | 2000 | USA                                         | Not specified | Not specified                 |
| 30 |                         |                    |      |                                             |               |                               |
| 31 | Emanuel                 | Survey             | 2000 | USA                                         | Not specified | Not specified                 |
| 32 |                         |                    |      |                                             |               |                               |
| 33 | Engler                  | Review             | 2007 | Belgium                                     | IV and Oral   | Home, Hospital, Nursing Homes |
| 34 |                         |                    |      |                                             |               |                               |
| 35 | Evrard                  | Position statement | 2013 | Belgium                                     | Not specified | Home, Hospital                |
| 36 |                         |                    |      |                                             |               |                               |
| 37 | Finlay & van Dijk       | Survey             | 2002 | Netherlands                                 | IV and Oral   | Not specified                 |
| 38 |                         |                    |      |                                             |               |                               |
| 39 | Fischer et al.          | Survey             | 2007 | Switzerland                                 | Oral          | NGO facility, Hospital        |
| 40 |                         |                    |      |                                             |               |                               |
| 41 | Wachter                 | Review             | 1989 | Netherlands                                 | Not specified | Not specified                 |
| 42 |                         |                    |      |                                             |               |                               |
| 43 |                         |                    |      |                                             |               |                               |
| 44 |                         |                    |      |                                             |               |                               |
| 45 |                         |                    |      |                                             |               |                               |
| 46 |                         |                    |      |                                             |               |                               |
| 47 |                         |                    |      |                                             |               |                               |
| 48 |                         |                    |      |                                             |               |                               |
| 49 |                         |                    |      |                                             |               |                               |
| 50 |                         |                    |      |                                             |               |                               |
| 51 |                         |                    |      |                                             |               |                               |
| 52 |                         |                    |      |                                             |               |                               |
| 53 |                         |                    |      |                                             |               |                               |
| 54 |                         |                    |      |                                             |               |                               |
| 55 |                         |                    |      |                                             |               |                               |
| 56 |                         |                    |      |                                             |               |                               |
| 57 |                         |                    |      |                                             |               |                               |
| 58 |                         |                    |      |                                             |               |                               |
| 59 |                         |                    |      |                                             |               |                               |
| 60 |                         |                    |      |                                             |               |                               |

|    |                                  |                       |      |                                     |               |                                                           |
|----|----------------------------------|-----------------------|------|-------------------------------------|---------------|-----------------------------------------------------------|
| 1  | Hiscox                           | Review                | 2007 | USA                                 | Not specified | Not specified                                             |
| 2  |                                  |                       |      |                                     |               |                                                           |
| 3  |                                  |                       |      |                                     |               |                                                           |
| 4  | Horikx et al.                    | Survey                | 2000 | Netherlands                         | IV and Oral   | Not specified                                             |
| 5  |                                  |                       |      |                                     |               |                                                           |
| 6  | Inghelbrecht et al.              | Cross-sectional study | 2008 | Belgium                             | Not specified | Home, Hospital, Nursing Homes                             |
| 7  |                                  |                       |      |                                     |               |                                                           |
| 8  |                                  |                       |      |                                     |               |                                                           |
| 9  |                                  |                       |      |                                     |               |                                                           |
| 10 | Jamison                          | Review                | 1996 | USA                                 | Not specified | Not specified                                             |
| 11 |                                  |                       |      |                                     |               |                                                           |
| 12 | Kimsma, 1996                     | Review                | 1996 | Netherlands                         | IV and Oral   | Not specified                                             |
| 13 |                                  |                       |      |                                     |               |                                                           |
| 14 | Kompanje et al.                  | Case Report           | 2007 | Netherlands                         | IV            | Hospital (ICU)                                            |
| 15 |                                  |                       |      |                                     |               |                                                           |
| 16 | Lalmohamed & Horikx              | Cross-sectional study | 2010 | Netherlands                         | IV and Oral   | Home, hospital, hospice, nursing home                     |
| 17 |                                  |                       |      |                                     |               |                                                           |
| 18 |                                  |                       |      |                                     |               |                                                           |
| 19 | Lau et al.                       | Survey                | 2000 | Netherlands                         | IV            | Not specified                                             |
| 20 |                                  |                       |      |                                     |               |                                                           |
| 21 | Lemiengre et al.                 | Qualitative study     | 2008 | Belgium                             | Not specified | Hospitals                                                 |
| 22 |                                  |                       |      |                                     |               |                                                           |
| 23 | Lossignol                        | Review                | 2008 | Belgium                             | IV and Oral   | Not specified                                             |
| 24 |                                  |                       |      |                                     |               |                                                           |
| 25 | Oregon Nurses Association,       | Guideline             | 2001 | USA                                 | IV            | Not specified                                             |
| 26 |                                  |                       |      |                                     |               |                                                           |
| 27 | Pasman et al.                    | Cross-sectional study | 2009 | Netherlands                         | IV            | Hospitals, nursing homes, hospices                        |
| 28 |                                  |                       |      |                                     |               |                                                           |
| 29 |                                  |                       |      |                                     |               |                                                           |
| 30 |                                  |                       |      |                                     |               |                                                           |
| 31 | Pennec et al.                    | Survey                | 2015 | France                              | IV            | Home                                                      |
| 32 |                                  |                       |      |                                     |               |                                                           |
| 33 | Rietjens et al.                  | Qualitative Study     | 2006 | Netherlands                         | IV            | Home, Hospital, Nursing Homes                             |
| 34 |                                  |                       |      |                                     |               |                                                           |
| 35 | Rietjens et al.                  | Review                | 2009 | Netherlands                         | IV            | Not specified                                             |
| 36 |                                  |                       |      |                                     |               |                                                           |
| 37 | Schildmann et al.                | Survey                | 2010 | Germany                             | Not specified | Not specified                                             |
| 38 |                                  |                       |      |                                     |               |                                                           |
| 39 | Smets et al.                     | Review                | 2009 | Multi-region (Netherlands, Belgium) | Not specified | Not specified                                             |
| 40 |                                  |                       |      |                                     |               |                                                           |
| 41 |                                  |                       |      |                                     |               |                                                           |
| 42 |                                  |                       |      |                                     |               |                                                           |
| 43 | Smets et al.                     | Cohort study          | 2010 | Belgium                             | IV and Oral   | Hospital (51.7% of cases), Home (42.2%), Care home (4.3%) |
| 44 |                                  |                       |      |                                     |               |                                                           |
| 45 |                                  |                       |      |                                     |               |                                                           |
| 46 |                                  |                       |      |                                     |               |                                                           |
| 47 | Smets et al.                     | Cross-sectional study | 2010 | Belgium                             | IV and Oral   | Home, hospital, or care home                              |
| 48 |                                  |                       |      |                                     |               |                                                           |
| 49 |                                  |                       |      |                                     |               |                                                           |
| 50 |                                  |                       |      |                                     |               |                                                           |
| 51 | Smets et al.                     | Qualitative           | 2010 | Belgium                             | IV and Oral   | Home                                                      |
| 52 |                                  |                       |      |                                     |               |                                                           |
| 53 | Sprij                            | Review                | 2010 | Netherlands                         | IV            | Not specified                                             |
| 54 |                                  |                       |      |                                     |               |                                                           |
| 55 | Thienpont et al.                 | Cohort study          | 2015 | Belgium                             | IV            | Home, Hospital                                            |
| 56 |                                  |                       |      |                                     |               |                                                           |
| 57 | van Bruchem-van de Scheur et al. | Survey                | 2008 | Netherlands                         | Not specified | Hospital                                                  |
| 58 |                                  |                       |      |                                     |               |                                                           |
| 59 |                                  |                       |      |                                     |               |                                                           |
| 60 |                                  |                       |      |                                     |               |                                                           |

|    |                  |              |      |               |               |                        |
|----|------------------|--------------|------|---------------|---------------|------------------------|
| 1  | van Bruchem-     | Survey       | 2008 | Netherlands   | Not specified | Home, Hospital,        |
| 2  | van de Scheur    |              |      |               |               | Nursing Homes          |
| 3  | et al.           |              |      |               |               |                        |
| 4  |                  |              |      |               |               |                        |
| 5  | van der Heide et | Survey       | 2007 | Netherlands   | Not specified | Not specified          |
| 6  | al.              |              |      |               |               |                        |
| 7  |                  |              |      |               |               |                        |
| 8  | van der Heide et | Cross-       | 2007 | Netherlands   | IV and Oral   | Not specified          |
| 9  | al.              | sectional    |      |               |               |                        |
| 10 |                  | study        |      |               |               |                        |
| 11 |                  |              |      |               |               |                        |
| 12 | van Heest et al. | Cross-       | 2009 | Netherlands   | IV            | Home                   |
| 13 |                  | sectional    |      |               |               |                        |
| 14 |                  | study        |      |               |               |                        |
| 15 |                  |              |      |               |               |                        |
| 16 | van Marwijk et   | Qualitative  | 2007 | Netherlands   | Not specified | Not specified          |
| 17 | al.              | study        |      |               |               |                        |
| 18 |                  |              |      |               |               |                        |
| 19 | Wineberg         | Cohort study | 2000 | USA           | Oral          | Not specified          |
| 20 |                  |              |      |               |               |                        |
| 21 | Ziegler &        | Review       | 2007 | Multi-region  | IV            | Oregan - Home,         |
| 22 | Bosshard         |              |      | (Switzerland, |               | Nursing home           |
| 23 |                  |              |      | USA)          |               | Switzerland - Home,    |
| 24 |                  |              |      |               |               | nursing home or in     |
| 25 |                  |              |      |               |               | some cases premisis of |
| 26 |                  |              |      |               |               | NGO                    |
| 27 |                  |              |      |               |               |                        |
| 28 | Health PEI       | Protocol     | 2016 | Canada        | IV            | Not specified          |
| 29 |                  |              |      |               |               |                        |
| 30 | Author           | Protocol     | 2012 | Netherlands   | IV and Oral   | Not specified          |
| 31 | Unknown          |              |      |               |               |                        |
| 32 | Author           | Review       | 2005 | Belgium       | IV            | At home in 41% of      |
| 33 | Unknown          |              |      |               |               | cases.                 |
| 34 |                  |              |      |               |               |                        |
| 35 | Author           | Protocol     | 2016 | Canada        | IV            | Hospital               |
| 36 | Unknown          |              |      |               |               |                        |
| 37 |                  |              |      |               |               |                        |
| 38 | Author           | Protocol     | 2017 | Canada        | IV            | Not specified          |
| 39 | Unknown          |              |      |               |               |                        |
| 40 |                  |              |      |               |               |                        |
| 41 | Author           | Protocol     | 2016 | Canada        | IV            | Hospital               |
| 42 | Unknown          |              |      |               |               |                        |
| 43 |                  |              |      |               |               |                        |
| 44 | Author           | Protocol     | 2017 | Canada        | IV            | Not specified          |
| 45 | Unknown          |              |      |               |               |                        |
| 46 |                  |              |      |               |               |                        |
| 47 | Author           | Protocol     | 2016 | Canada        | IV            | Not specified          |
| 48 | Unknown          |              |      |               |               |                        |
| 49 |                  |              |      |               |               |                        |
| 50 | Author           | Protocol     | 2016 | Canada        | IV            | Not specified          |
| 51 | Unknown          |              |      |               |               |                        |
| 52 |                  |              |      |               |               |                        |
| 53 | Author           | Protocol     | 2017 | Canada        | IV and Oral   | Not specified          |
| 54 | Unknown          |              |      |               |               |                        |
| 55 |                  |              |      |               |               |                        |
| 56 | Author           | Protocol     | 2016 | Canada        | IV            | Not specified          |
| 57 | Unknown          |              |      |               |               |                        |

|                    |                       |      |                                                                       |               |                                                                                     |
|--------------------|-----------------------|------|-----------------------------------------------------------------------|---------------|-------------------------------------------------------------------------------------|
| Author Unknown     | Protocol              | 2016 | Canada                                                                | IV            | Not specified                                                                       |
| Author Unknown     | Protocol              | 2018 | Canada                                                                | IV and Oral   | Not specified                                                                       |
| Author Unknown     | Protocol              | 2018 | Canada                                                                | IV and Oral   | Not specified                                                                       |
| Author Unknown     | Protocol              | 2017 | Canada                                                                | IV            | Location is to be determined through discussion with patient and family/caregivers. |
| Author Unknown     | Protocol              | 2018 | Canada                                                                | IV            | Not specified                                                                       |
| Author Unknown     | Protocol              | 2017 | Canada                                                                | IV            | Not specified                                                                       |
| Author Unknown     | Protocol              | 2016 | Canada                                                                | IV            | Not specified                                                                       |
| Borgsteede et al.  | Survey                | 2011 | Netherlands                                                           | Not specified | Not specified                                                                       |
| Bosshard et al.    | Review                | 2008 | Multi-region (Belgium, Netherlands, Switzerland, Germany, Norway, UK) | Not specified | Not specified                                                                       |
| Burkhardt et al.   | Review                | 2014 | Switzerland                                                           | Oral          | Home, medico-social institution                                                     |
| Campbell & Black   | Cross-sectional study | 2014 | USA                                                                   | Not specified | Hospice                                                                             |
| de Casterle et al. | Qualitative study     | 2006 | Belgium                                                               |               | Not specified                                                                       |
| Dees et al.        | Qualitative study     | 2013 | Netherlands                                                           | Not specified | Not specified                                                                       |
| Dierickx et al.    | Cross-sectional study | 2016 | Belgium                                                               | Not specified | Home, hospital                                                                      |
| Francke et al.     | Survey                | 2015 | Netherlands                                                           | Not specified | Not specified                                                                       |
| Fass & Fass        | Review                | 2011 | USA                                                                   | Oral          | Home                                                                                |
| Grube              | Protocol              | 2014 | USA                                                                   | Oral          | Not specified                                                                       |

|                                       |                              |      |                                    |               |                                                                               |
|---------------------------------------|------------------------------|------|------------------------------------|---------------|-------------------------------------------------------------------------------|
| Hedberg et al.                        | Cohort study                 | 2009 | USA                                | Oral          | Home                                                                          |
| Hesselink et al.                      | Review                       | 2012 | Netherlands                        | Not specified | Hospitals, Nursing Homes                                                      |
| Hicks                                 | Review                       | 2006 | Multi-region                       | Not specified | Not specified                                                                 |
| Lemiengre                             | Qualitative study            | 2008 | Belgium                            | Not specified | Nursing home                                                                  |
| Author Unknown                        | Protocol                     | 2015 | Columbia                           | IV            | Not specified                                                                 |
| Ogden                                 | Case Report                  | 2010 | Switzerland                        | Oral          | At the headquarters of Dignitas, a right-to-die organisation                  |
| Onwuteaka-Phillipsen et al.           | Cross-sectional study        | 2012 | Netherlands                        | Not specified | Mostly undertaken in general practice rather than hospitals or nursing homes. |
| Smets et al.                          | Cross-sectional study        | 2010 | Belgium                            | Not specified | Not specified                                                                 |
| Sullivan et al.                       | Cohort study                 | 2000 | USA                                | IV            | Not specified                                                                 |
| Wang et al.                           | Cohort study                 | 2015 | USA                                | Oral          | Home                                                                          |
| Washington State Department of Health | Protocol                     | 2015 | USA                                | Oral          | For 2015: home 86%; Long Term Care 10%; other 1% unknown 3%.                  |
| Weiss et al.                          | Clinical practice handbook   | 2018 | Canada                             | IV            | Not specified                                                                 |
| Ysebaert et al.                       | Cohort study                 | 2015 | Belgium                            | Not specified | Hospital                                                                      |
| Emanuel et al.                        | Systematic Review            | 2016 | Multi-region (USA, Canada, Europe) | Not specified | Not specified                                                                 |
| Rabadi et al.                         | Cohort study (retrospective) | 2019 | USA                                | Not specified | Home, Hospice                                                                 |
| Ball et al.                           | Descriptive Study            | 2019 | Canada                             | IV            | Home, Hospital, Nursing Home                                                  |
| Beardsley et al.                      | Descriptive Study            | 2018 | Australia                          | Oral          | Not specified                                                                 |



|    |                   |                                     |      |              |               |                                                           |
|----|-------------------|-------------------------------------|------|--------------|---------------|-----------------------------------------------------------|
| 1  | Blanke et al.     | Cohort study<br>(retrospective<br>) | 2018 | USA          | Not specified | Not specified                                             |
| 2  | Blanke et. Al     | Cohort study<br>(retrospective<br>) | 2017 | USA          | oral          | Home, Hospice                                             |
| 3  |                   |                                     |      |              |               |                                                           |
| 4  |                   |                                     |      |              |               |                                                           |
| 5  |                   |                                     |      |              |               |                                                           |
| 6  | Buchbinder et al. | Qualitative<br>study                | 2018 | USA          | Not specified | Home                                                      |
| 7  |                   |                                     |      |              |               |                                                           |
| 8  |                   |                                     |      |              |               |                                                           |
| 9  |                   |                                     |      |              |               |                                                           |
| 10 | Dierickx et al.   | Cohort study<br>(retrospective<br>) | 2018 | Belgium      | IV            | Home, hospital, care<br>home                              |
| 11 |                   |                                     |      |              |               |                                                           |
| 12 | Dierickx et al.   | Cohort study<br>(retrospective<br>) | 2018 | Belgium      | Not specified | Home, Nursing home,<br>hospital                           |
| 13 |                   |                                     |      |              |               |                                                           |
| 14 |                   |                                     |      |              |               |                                                           |
| 15 |                   |                                     |      |              |               |                                                           |
| 16 | Hales et al.      | Mixed<br>methods<br>study           | 2019 | Canada       | Not specified | Not specified                                             |
| 17 |                   |                                     |      |              |               |                                                           |
| 18 |                   |                                     |      |              |               |                                                           |
| 19 |                   |                                     |      |              |               |                                                           |
| 20 | Harty et al.      | Review                              | 2019 | Multi-region | Oral          | Not specified                                             |
| 21 |                   |                                     |      |              |               |                                                           |
| 22 |                   |                                     |      |              |               |                                                           |
| 23 |                   |                                     |      |              |               |                                                           |
| 24 | Hedberg & New     | Cohort study<br>(retrospective<br>) | 2017 | USA          | Not specified | Not specified                                             |
| 25 |                   |                                     |      |              |               |                                                           |
| 26 |                   |                                     |      |              |               |                                                           |
| 27 |                   |                                     |      |              |               |                                                           |
| 28 |                   |                                     |      |              |               |                                                           |
| 29 | Hughes            | Commentary                          | 2017 | USA          | Oral          | Not specified                                             |
| 30 |                   |                                     |      |              |               |                                                           |
| 31 | Hurst et al.      | Cohort study<br>(retrospective<br>) | 2018 | Switzerland  | Not specified | Home, Hospital                                            |
| 32 |                   |                                     |      |              |               |                                                           |
| 33 |                   |                                     |      |              |               |                                                           |
| 34 |                   |                                     |      |              |               |                                                           |
| 35 | Li et al.         | Report                              | 2017 | Canada       | Not specified | Hospital                                                  |
| 36 |                   |                                     |      |              |               |                                                           |
| 37 | Riley et al.      | Qualitative<br>study                | 2019 | Netherlands  | IV and Oral   | Home, Hospital,<br>Nursing Home                           |
| 38 |                   |                                     |      |              |               |                                                           |
| 39 |                   |                                     |      |              |               |                                                           |
| 40 | Silvius et al.    | Policy<br>Analysis                  | 2019 | Canada       | Not specified | Hospital, home,<br>nursing home, long<br>term care centre |
| 41 |                   |                                     |      |              |               |                                                           |
| 42 |                   |                                     |      |              |               |                                                           |
| 43 |                   |                                     |      |              |               |                                                           |
| 44 | Wang              | Case Report                         | 2018 | USA          | Not specified | Home                                                      |
| 45 |                   |                                     |      |              |               |                                                           |
| 46 |                   |                                     |      |              |               |                                                           |
| 47 |                   |                                     |      |              |               |                                                           |
| 48 |                   |                                     |      |              |               |                                                           |
| 49 |                   |                                     |      |              |               |                                                           |
| 50 |                   |                                     |      |              |               |                                                           |
| 51 |                   |                                     |      |              |               |                                                           |
| 52 |                   |                                     |      |              |               |                                                           |
| 53 |                   |                                     |      |              |               |                                                           |
| 54 |                   |                                     |      |              |               |                                                           |
| 55 |                   |                                     |      |              |               |                                                           |
| 56 |                   |                                     |      |              |               |                                                           |
| 57 |                   |                                     |      |              |               |                                                           |
| 58 |                   |                                     |      |              |               |                                                           |
| 59 |                   |                                     |      |              |               |                                                           |
| 60 |                   |                                     |      |              |               |                                                           |

## Preferred Reporting Items for Systematic reviews and Meta-Analyses extension for Scoping Reviews (PRISMA-ScR) Checklist

| SECTION                                               | ITEM | PRISMA-ScR CHECKLIST ITEM                                                                                                                                                                                                                                                                                  | REPORTED ON PAGE # |
|-------------------------------------------------------|------|------------------------------------------------------------------------------------------------------------------------------------------------------------------------------------------------------------------------------------------------------------------------------------------------------------|--------------------|
| <b>TITLE</b>                                          |      |                                                                                                                                                                                                                                                                                                            |                    |
| Title                                                 | 1    | Identify the report as a scoping review.                                                                                                                                                                                                                                                                   | 1                  |
| <b>ABSTRACT</b>                                       |      |                                                                                                                                                                                                                                                                                                            |                    |
| Structured summary                                    | 2    | Provide a structured summary that includes (as applicable): background, objectives, eligibility criteria, sources of evidence, charting methods, results, and conclusions that relate to the review questions and objectives.                                                                              | 3                  |
| <b>INTRODUCTION</b>                                   |      |                                                                                                                                                                                                                                                                                                            |                    |
| Rationale                                             | 3    | Describe the rationale for the review in the context of what is already known. Explain why the review questions/objectives lend themselves to a scoping review approach.                                                                                                                                   | 3                  |
| Objectives                                            | 4    | Provide an explicit statement of the questions and objectives being addressed with reference to their key elements (e.g., population or participants, concepts, and context) or other relevant key elements used to conceptualize the review questions and/or objectives.                                  | 4                  |
| <b>METHODS</b>                                        |      |                                                                                                                                                                                                                                                                                                            |                    |
| Protocol and registration                             | 5    | Indicate whether a review protocol exists; state if and where it can be accessed (e.g., a Web address); and if available, provide registration information, including the registration number.                                                                                                             | 4                  |
| Eligibility criteria                                  | 6    | Specify characteristics of the sources of evidence used as eligibility criteria (e.g., years considered, language, and publication status), and provide a rationale.                                                                                                                                       | 5                  |
| Information sources*                                  | 7    | Describe all information sources in the search (e.g., databases with dates of coverage and contact with authors to identify additional sources), as well as the date the most recent search was executed.                                                                                                  | 5                  |
| Search                                                | 8    | Present the full electronic search strategy for at least 1 database, including any limits used, such that it could be repeated.                                                                                                                                                                            | 5                  |
| Selection of sources of evidence†                     | 9    | State the process for selecting sources of evidence (i.e., screening and eligibility) included in the scoping review.                                                                                                                                                                                      | 5-6                |
| Data charting process‡                                | 10   | Describe the methods of charting data from the included sources of evidence (e.g., calibrated forms or forms that have been tested by the team before their use, and whether data charting was done independently or in duplicate) and any processes for obtaining and confirming data from investigators. | 6                  |
| Data items                                            | 11   | List and define all variables for which data were sought and any assumptions and simplifications made.                                                                                                                                                                                                     | 6                  |
| Critical appraisal of individual sources of evidence§ | 12   | If done, provide a rationale for conducting a critical appraisal of included sources of evidence; describe the methods used and how this information was used in any data synthesis (if appropriate).                                                                                                      | NA                 |

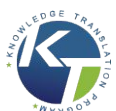

| SECTION                                       | ITEM | PRISMA-ScR CHECKLIST ITEM                                                                                                                                                                       | REPORTED ON PAGE # |
|-----------------------------------------------|------|-------------------------------------------------------------------------------------------------------------------------------------------------------------------------------------------------|--------------------|
| Synthesis of results                          | 13   | Describe the methods of handling and summarizing the data that were charted.                                                                                                                    | 6                  |
| <b>RESULTS</b>                                |      |                                                                                                                                                                                                 |                    |
| Selection of sources of evidence              | 14   | Give numbers of sources of evidence screened, assessed for eligibility, and included in the review, with reasons for exclusions at each stage, ideally using a flow diagram.                    | 7                  |
| Characteristics of sources of evidence        | 15   | For each source of evidence, present characteristics for which data were charted and provide the citations.                                                                                     | 7                  |
| Critical appraisal within sources of evidence | 16   | If done, present data on critical appraisal of included sources of evidence (see item 12).                                                                                                      | NA                 |
| Results of individual sources of evidence     | 17   | For each included source of evidence, present the relevant data that were charted that relate to the review questions and objectives.                                                           | Supplemental file  |
| Synthesis of results                          | 18   | Summarize and/or present the charting results as they relate to the review questions and objectives.                                                                                            | 7                  |
| <b>DISCUSSION</b>                             |      |                                                                                                                                                                                                 |                    |
| Summary of evidence                           | 19   | Summarize the main results (including an overview of concepts, themes, and types of evidence available), link to the review questions and objectives, and consider the relevance to key groups. | 9-10               |
| Limitations                                   | 20   | Discuss the limitations of the scoping review process.                                                                                                                                          | 11                 |
| Conclusions                                   | 21   | Provide a general interpretation of the results with respect to the review questions and objectives, as well as potential implications and/or next steps.                                       | 12                 |
| <b>FUNDING</b>                                |      |                                                                                                                                                                                                 |                    |
| Funding                                       | 22   | Describe sources of funding for the included sources of evidence, as well as sources of funding for the scoping review. Describe the role of the funders of the scoping review.                 | 12                 |

JBI = Joanna Briggs Institute; PRISMA-ScR = Preferred Reporting Items for Systematic reviews and Meta-Analyses extension for Scoping Reviews.

\* Where *sources of evidence* (see second footnote) are compiled from, such as bibliographic databases, social media platforms, and Web sites.

† A more inclusive/heterogeneous term used to account for the different types of evidence or data sources (e.g., quantitative and/or qualitative research, expert opinion, and policy documents) that may be eligible in a scoping review as opposed to only studies. This is not to be confused with *information sources* (see first footnote).

‡ The frameworks by Arksey and O'Malley (6) and Levac and colleagues (7) and the JBI guidance (4, 5) refer to the process of data extraction in a scoping review as data charting.

§ The process of systematically examining research evidence to assess its validity, results, and relevance before using it to inform a decision. This term is used for items 12 and 19 instead of "risk of bias" (which is more applicable to systematic reviews of interventions) to include and acknowledge the various sources of evidence that may be used in a scoping review (e.g., quantitative and/or qualitative research, expert opinion, and policy document).

From: Tricco AC, Lillie E, Zarin W, O'Brien KK, Colquhoun H, Levac D, et al. PRISMA Extension for Scoping Reviews (PRISMA-ScR): Checklist and Explanation. *Ann Intern Med.* 2018;169:467–473. doi: 10.7326/M18-0850.

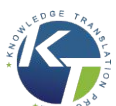

St. Michael's

Inspired Care.  
Inspiring Science.

For peer review only - <http://bmjopen.bmj.com/site/about/guidelines.xhtml>

# BMJ Open

## The provision of medical assistance in dying: a scoping review

|                                 |                                                                                                                                                                                                                                                                                                                                                                                                                                                                                                                                                                                                                                                                                                                                                                                                  |
|---------------------------------|--------------------------------------------------------------------------------------------------------------------------------------------------------------------------------------------------------------------------------------------------------------------------------------------------------------------------------------------------------------------------------------------------------------------------------------------------------------------------------------------------------------------------------------------------------------------------------------------------------------------------------------------------------------------------------------------------------------------------------------------------------------------------------------------------|
| Journal:                        | <i>BMJ Open</i>                                                                                                                                                                                                                                                                                                                                                                                                                                                                                                                                                                                                                                                                                                                                                                                  |
| Manuscript ID                   | bmjopen-2019-036054.R2                                                                                                                                                                                                                                                                                                                                                                                                                                                                                                                                                                                                                                                                                                                                                                           |
| Article Type:                   | Original research                                                                                                                                                                                                                                                                                                                                                                                                                                                                                                                                                                                                                                                                                                                                                                                |
| Date Submitted by the Author:   | 25-May-2020                                                                                                                                                                                                                                                                                                                                                                                                                                                                                                                                                                                                                                                                                                                                                                                      |
| Complete List of Authors:       | Zworth, Max; University of Ottawa Faculty of Medicine, Emergency Medicine<br>Saleh, Carol; McMaster University, Medicine<br>Ball, Ian; Western University, Division of Critical Care Medicine<br>Kalles, Gaelen; Hamilton Health Sciences<br>Chkaroubo, Anatoli; Hamilton Health Sciences<br>Kekewich, Mike; Ottawa Hospital, Clinical and Organizational Ethics<br>Miller, Paul; Hamilton Health Sciences, Emergency Medicine; McMaster University, Medicine (Emergency Medicine)<br>Dees, Marianne; Radboudumc, Department for Primary and Community Care<br>Frolic, Andrea; Hamilton Health Sciences, Clinical and Organizational Ethics<br>Oczkowski, Simon; McMaster University, Medicine (Critical Care); McMaster University, Department of Health Research Methods, Evidence, and Impact |
| <b>Primary Subject Heading</b>: | Evidence based practice                                                                                                                                                                                                                                                                                                                                                                                                                                                                                                                                                                                                                                                                                                                                                                          |
| Secondary Subject Heading:      | Palliative care                                                                                                                                                                                                                                                                                                                                                                                                                                                                                                                                                                                                                                                                                                                                                                                  |
| Keywords:                       | PALLIATIVE CARE, Adult intensive & critical care < INTENSIVE & CRITICAL CARE, Protocols & guidelines < HEALTH SERVICES ADMINISTRATION & MANAGEMENT, MEDICAL ETHICS                                                                                                                                                                                                                                                                                                                                                                                                                                                                                                                                                                                                                               |
|                                 |                                                                                                                                                                                                                                                                                                                                                                                                                                                                                                                                                                                                                                                                                                                                                                                                  |

SCHOLARONE™  
Manuscripts



I, the Submitting Author has the right to grant and does grant on behalf of all authors of the Work (as defined in the below author licence), an exclusive licence and/or a non-exclusive licence for contributions from authors who are: i) UK Crown employees; ii) where BMJ has agreed a CC-BY licence shall apply, and/or iii) in accordance with the terms applicable for US Federal Government officers or employees acting as part of their official duties; on a worldwide, perpetual, irrevocable, royalty-free basis to BMJ Publishing Group Ltd ("BMJ") its licensees and where the relevant Journal is co-owned by BMJ to the co-owners of the Journal, to publish the Work in this journal and any other BMJ products and to exploit all rights, as set out in our [licence](#).

The Submitting Author accepts and understands that any supply made under these terms is made by BMJ to the Submitting Author unless you are acting as an employee on behalf of your employer or a postgraduate student of an affiliated institution which is paying any applicable article publishing charge ("APC") for Open Access articles. Where the Submitting Author wishes to make the Work available on an Open Access basis (and intends to pay the relevant APC), the terms of reuse of such Open Access shall be governed by a Creative Commons licence – details of these licences and which [Creative Commons](#) licence will apply to this Work are set out in our licence referred to above.

Other than as permitted in any relevant BMJ Author's Self Archiving Policies, I confirm this Work has not been accepted for publication elsewhere, is not being considered for publication elsewhere and does not duplicate material already published. I confirm all authors consent to publication of this Work and authorise the granting of this licence.

## The provision of medical assistance in dying: a scoping review

Max Zworth<sup>1</sup>, Carol Saleh<sup>2</sup>, Ian Ball MD<sup>3</sup>, Gaelen Kalles RN<sup>4</sup>, Anatoli Chkaroubo<sup>4</sup>, Mike Kekewich<sup>5</sup>, Paul Miller<sup>4,6</sup>, Marianne Dees<sup>7</sup>, Andrea Frolic<sup>4</sup>, Simon J W Oczkowski MD<sup>2,4,8</sup>

### Author affiliations

1. Michael G. DeGroot School of Medicine, McMaster University, Hamilton, Canada
2. Department of Medicine, McMaster University, Hamilton, Canada
3. Division of Critical Care Medicine, Western University, London, Canada
4. Hamilton Health Sciences, Hamilton, Canada
5. Department of Clinical and Organizational Ethics, The Ottawa Hospital, Ottawa, Canada
6. Division of Emergency Medicine, Department of Medicine, McMaster University, Hamilton, Canada
7. Department for Primary and Community Care, Radboud University Medical Center, Nijmegen, The Netherlands
8. Department of Health Research Methods, Evidence, and Impact, McMaster University, Hamilton, Canada

### **Corresponding author:**

Max Zworth  
Michael G. DeGroot School of Medicine, McMaster University  
1280 Main Street West  
Hamilton, ON, Canada, L8S 4L8  
[max.zworth@medportal.ca](mailto:max.zworth@medportal.ca)

### **Funding**

This research is supported by a Hamilton Academic Health Sciences Organization's innovation fund. Dr. Oczkowski is supported by an internal career award from the Department of Medicine at McMaster University. Max Zworth is supported by the McMaster Medical Student Research Excellence Scholarship (MAC RES).

**Tables: 4**

**Figures: 3**

**Word count: 3097**

## Abstract (maximum 300 words)

**Objectives:** The purpose of this study is to map the characteristics of the existing medical literature describing the medications, settings, participants and outcomes of medical assistance in dying (MAID), in order to identify knowledge gaps and areas for future research.

**Design:** Scoping review

**Search strategy:** We searched electronic databases (MEDLINE, EmBASE, PsychINFO, CINAHL, CENTRAL), clinical trial registries, conference abstracts, and professional guidelines from jurisdictions where MAID is legal, up to February 2020. Eligible report types included technical summaries, institutional policies, practice surveys, practice guidelines and clinical studies that describe MAID provision in adults who have provided informed consent for MAID.

**Results:** 163 articles published between 1989 and 2020 met eligibility criteria. 75 studies described details for MAID administered by IV medications, and 50 studies provided data on oral medications. In IV protocols, MAID was most commonly administered using a barbiturate (34/163) or propofol (22/163) followed by a neuromuscular blocker. Oral protocols most often used barbiturates alone (37/163) or in conjunction with an opioid medication (7/163). and often recommended using a prokinetic agent prior to lethal drug ingestion. Complications included prolonged duration of the dying process, difficulty obtaining IV access, and difficulty swallowing oral agents. Most commonly, the role of physicians was prescribing (83/163) and administering medications (75/163). Nurses roles included administering medications (17/163) and supporting the patient (16/163) or family (13/163). The role of families involved providing support to the patient (17/163) and bringing medications from pharmacy for self-administration (4/163).

**Conclusions:** We identified several trends in MAID provision including common medications and doses for oral and parenteral administration, roles of healthcare professionals and families, and complications that may cause patient, family and provider distress. Future research should aim to identify the medications, dosages, and administration techniques and procedures which produce the most predictable outcomes and mitigate distress for those involved.

**Key words:** assisted dying, euthanasia, assisted suicide, physician assisted dying, scoping review

## Article Summary:

### Strengths and limitations of this study:

- We conducted a scoping review of MAID provision using very broad and inclusive search strategy and a pre-published protocol
- Screening was performed in duplicate by two investigators at both the title/abstract and full-text level
- We describe a wide variety of methods for providing MAID, though few reports described the number of times the protocol has been used
- The reports we found did not generally link data between medications, locations, providers, and outcomes, making it difficult to determine which medications or combinations of medications are most effective and result in the fewest complications
- Our study is limited by its emphasis on Canadian practice, which is likely due both to most authors being Canadian, and the more standardized approaches to MAID provision in European countries compared to North America

## Introduction

In 2016, the Canadian government passed Bill C-14, which decriminalized medical assistance in dying (MAID) for capable patients with intolerable suffering for whom death was 'reasonably foreseeable.'<sup>(1)</sup> As of October 2018 there have been over 6749 medically assisted deaths in Canada, and MAID accounted for approximately 1.12% of all deaths in Canada in the first 10 months of 2018.<sup>(2)</sup> Bill C-14 legislated eligibility criteria under which patients could receive MAID, but provided no guidance on the clinical aspects of providing aid in dying. Critical clinical issues remain unaddressed, such as which pharmaceuticals, doses, and routes of administration should be used to cause death; the roles, scope of practice, and training requirements for health care professionals; the optimal locations for MAID (community, institutional settings, or in dedicated centers); and ways to support patients and their families around the time of an assisted death. Several other jurisdictions currently permit MAID in the form of assisted suicide (Switzerland, and the American states of Oregon, Montana, Washington, California, Colorado, Vermont, Washington DC, New Jersey, Maine, Hawaii),



1  
2  
3 euthanasia (Columbia), or both (Belgium, the Netherlands and Luxembourg).(3) While states  
4 such as Oregon maintain detailed records for all cases of MAID (4), there are few centralized  
5 protocols for MAID provision in these settings (5), and there remains little readily available  
6 evidence to assist Canadian clinicians and organizations in addressing these questions. Thus,  
7 Canadian health care providers and organizations had to rapidly develop policies and practices  
8 for the assessment and provision of MAID in anticipation of this legislative change. Some  
9 provinces (such as Alberta and Manitoba) have developed highly centralized care coordination  
10 services, while others (such as Ontario) have adopted a hands-off approach, allowing individual  
11 clinicians and health care organizations to develop local policies and protocols for MAID. As a  
12 result, there is significant variation in how MAID is practiced across Canada.  
13  
14  
15  
16  
17  
18  
19  
20

21 This is worrisome, as data from other countries suggests that clinical problems with  
22 MAID care are common, including poor communication between health care providers and  
23 patients, inconsistent application of eligibility criteria, unequal access, and technical problems  
24 with medication administration.(6-10) Though new federal reporting requirements for MAID  
25 took effect in 2018, the collected data is descriptive, and not intended to evaluate the quality or  
26 consistency of MAID provision.(11) While an abundance of literature has emerged in recent  
27 years discussing ethical questions around MAID and the experiences of those involved in the  
28 MAID process, there is relatively sparse literature addressing the medical aspects of providing  
29 aid in dying. Thus, we conducted a scoping review on MAID provision in all jurisdictions where  
30 medically assisted dying is practiced, with two primary objectives:  
31  
32  
33  
34  
35  
36  
37  
38  
39

- 40 1. To describe the range and scope of the existing medical literature on the provision of  
41 MAID
- 42 2. To summarize reports of the technical aspects of MAID provision, including  
43 pharmaceuticals and procedures; location of provision; the role and scope of involved  
44 healthcare professionals; role of patients' families; and descriptions of adverse events.  
45  
46  
47  
48  
49

## 50 **Methods**

### 51 Protocol and registration

52  
53  
54  
55  
56  
57  
58  
59  
60

1  
2  
3 The methods of this scoping review are based on those described in the Joanna Briggs Institute  
4 Reviewers Manual (12) and are described in detail in a previously published study protocol (13).  
5  
6  
7

### 8 Eligibility criteria

9  
10 Eligible sources included technical reports, institutional policies, practice surveys, clinical  
11 practice guidelines and clinical studies. Opinion pieces/letters were excluded, as were reports  
12 solely describing the assessment of patient eligibility for MAID. No restrictions were imposed  
13 based on methodological quality, study location, language or publication date. We included  
14 reports referring to adult (age > 18 years) patients who provided informed consent for MAID in  
15 the form of either assisted suicide (self-administered lethal medications) or voluntary  
16 euthanasia (lethal medications administered by another person). We included reports  
17 describing the provision of MAID using any medication delivery method, in institutions and  
18 residences, which involved a healthcare professional such as a physician, nurse, or pharmacist.  
19 We excluded reports describing other end-of-life practices, including withholding or  
20 withdrawing life-sustaining treatment; palliative sedation or unintentional hastening of death  
21 via medications for symptom management, unless such reports also included separate  
22 descriptions of MAID. Studies in which patients received euthanasia without having provided  
23 informed consent (eg. capital punishment) were excluded (Table 1).  
24  
25  
26  
27  
28  
29  
30  
31  
32  
33  
34  
35  
36  
37

### 38 Information Sources and Searches

39  
40 Briefly, we conducted systematic searches of multiple online databases, including MEDLINE,  
41 EMBASE, CINAHL, CENTRAL and PsycINFO from database inception to February 2020 for the  
42 concept of MAID ('[medical] aid [assistance] in dying', 'euthanasia', 'assisted suicide',  
43 '[physician] assisted dying', '[physician] assisted death', 'end of life choice') and the concept of  
44 medication administration ('practice patterns', 'drug administration', 'medication  
45 management', 'drug utilization', 'drug therapy'). Complete search details are available in  
46 supplementary file 1. We also conducted extensive grey literature searches, including clinical  
47 trial databases, conference abstracts from palliative care conferences, technical reports of  
48 MAID protocols and institutional policies for MAID until June 2018. Finally, we contacted  
49  
50  
51  
52  
53  
54  
55  
56  
57  
58  
59  
60

1  
2  
3 professional groups and government agencies that monitor and regulate healthcare to obtain  
4 protocols and reports describing the provision of MAID.  
5  
6  
7

### 8 Selection of sources of evidence

9  
10 Report eligibility was determined first by title and abstract screening, and second by full-text  
11 screening. After pilot-testing the screening and eligibility forms on the first 100 abstracts and 10  
12 full-text papers, two investigators (CS, SJO) independently reviewed each report's eligibility for  
13 inclusion in the review. During the course of the review, no changes were made to the inclusion  
14 or exclusion criteria.  
15  
16  
17  
18  
19  
20

### 21 Data charting process

22  
23 We conducted calibration exercises on the first 5 eligible studies to pilot-test the extraction  
24 form and ensure consistent data collection. Two investigators (MZ, CS) then independently  
25 extracted data using structured forms divided into three major concepts: report characteristics,  
26 methods of MAID provision, and MAID outcomes (supplementary file 2). The data collection  
27 form was not modified throughout the extraction process. As our study's objectives were  
28 descriptive, we did not conduct a critical appraisal of the individual studies we retrieved.  
29  
30  
31  
32  
33  
34  
35

### 36 Synthesis of results

37  
38 Data were organized according to the three major concepts listed above (report characteristics;  
39 MAID provision; and MAID outcomes). Univariate descriptive statistics were computed for  
40 report characteristics, including year of publication, report type and report purpose, in order to  
41 provide an overview of the scope and content of the existing literature on MAID. Descriptive  
42 statistics (frequency, proportion of studies) were also calculated for categorical data regarding  
43 MAID provision, including medications and dosages used in IV and oral protocols, order of  
44 medication administration, and MAID locations. Non-categorical information about MAID  
45 provision such as the roles ascribed to various health professionals and safety checks was  
46 compiled into a list format, and a team of three investigators extracted common themes by  
47 consensus. Similarly, data regarding MAID outcomes and complications was summarized by  
48  
49  
50  
51  
52  
53  
54  
55  
56  
57  
58  
59  
60

1  
2  
3 identifying keywords (eg. “IV access” or “time to death”), and from there descriptive statistics  
4 were generated regarding the frequency with which various complications were identified in  
5 the literature.  
6  
7  
8  
9

## 10 **Results**

### 11 Selection of sources of evidence

12 The initial online database search identified 12514 potential reports, and 22 additional reports  
13 were identified through the grey literature search (Figure 1). After removing duplicate items,  
14 11470 abstracts were screened, 582 of which met initial eligibility criteria and were assessed  
15 through full-text screening. Among these, articles were removed if they were of an ineligible  
16 reference type, reported on an ineligible population, only addressed MAID eligibility rather than  
17 provision, could not be successfully accessed, or were one of multiple reports on the same  
18 data. After applying these exclusion criteria, 163 articles were included in the review (see  
19 supplementary file 3).  
20  
21  
22  
23  
24  
25  
26  
27  
28  
29

### 30 Characteristics of sources of evidence

31 The identified reports were published between 1989 and 2019, with the greatest number  
32 published in 2010 (n=14) and 2016 (n=15), and 50% of reports published in 2009 or later.  
33 Report types included non-systematic reviews (including policy and legal reviews) (n=53), cross-  
34 sectional surveys (n=32), MAID medication protocols (n=19), cohort studies (n=22), cross-  
35 sectional studies, including death certificate studies (n=14), qualitative studies (n=13), clinical  
36 practice guidelines/best practices (n=6), systematic reviews (n=2) (Table 2). Reports described  
37 MAID provision in The Netherlands (n=45), United States (n=43), Belgium (n=29), Canada  
38 (n=22), Switzerland (n=8), or multiple regions (n=13). For a complete list of data charted from  
39 each source of evidence, see supplementary file 4.  
40  
41  
42  
43  
44  
45  
46  
47  
48  
49

### 50 Synthesis of results

#### 51 *Medications*

52  
53  
54  
55  
56  
57  
58  
59  
60

1  
2  
3 Close to half of the reports provided details for MAID administered by IV medications (75/163).  
4  
5 A sample protocol for MAID administration by IV medication is presented in Figure 2 and the  
6  
7 frequencies and doses encountered for IV medications are shown in Table 3. The use of a  
8  
9 general anaesthetic in combination with a neuromuscular blocker (NMB) was described in 57%  
10  
11 of these studies (43/75). The general anaesthetic mentioned was most commonly a barbiturate  
12  
13 (34/43) or propofol (22/43). Neuromuscular blocking agents most commonly used were  
14  
15 cisatracurium, rocuronium, and pancuronium. Of the 75 reports discussing IV protocols, 29  
16  
17 referred to the use of an anxiolytic prior to medication administration. Only two directly cardio-  
18  
19 toxic agents were reported, bupivacaine (2/75) and potassium chloride (2/75)  
20

21  
22 Oral MAID regimes were detailed in 50/163 reports. A sample protocol for oral administration is  
23  
24 presented in Figure 3, and the frequencies and doses for oral medications are presented in  
25  
26 Table 4. Barbiturate medications are mentioned in 94% of oral protocols (47/50). The life-ending  
27  
28 drug was a barbiturate alone in 74% (37/50) of oral regime studies, though barbiturates were  
29  
30 also occasionally used with an opioid medication (14%, 7/50) or an alcohol (6%, 3/50).  
31  
32 Pentobarbital and secobarbital were the oral barbiturates most commonly mentioned, each  
33  
34 referred to in 34% (17/50) of studies. Additionally, barbiturates were mentioned without specific  
35  
36 medications or doses in 34% (17/50) of reports. A single report described a combination of  
37  
38 propranolol, digoxin, and diazepam. To avoid vomiting, antiemetics, most commonly  
39  
40 metoclopramide (7/50) or ondansetron (5/50) were given prior to administration of life-ending  
41  
42 drugs was included in 36% of oral reports (18/50). Anxiolytic medication such as midazolam or  
43  
44 lorazepam appear in 12% (6/50) of studies. An "as-needed" IV neuromuscular blocker was  
45  
46 described as a backup in case of failure of oral medications in 26% (13/50) of reports. A single  
47  
48 report described the use of helium gas to induce unconsciousness and death.

#### 49 *Locations where assisted dying takes place*

50  
51 65/163 articles described the setting for MAID administration. The two most common locations  
52  
53 for MAID provision were in hospital (43/65) and at the patient's home (43/65). Other settings  
54  
55  
56  
57  
58  
59

1  
2  
3 include nursing home (24/65), hospice (7/65) and other settings (7/65), including locations such  
4 as the headquarters of the non-governmental organization Dignitas in Switzerland.  
5  
6  
7

### 8 *The role of health professionals in assisted dying*

9  
10 The three health professions whose roles in MAID provision were most often described  
11 were physicians (106/163), nurses (33/163) and pharmacists (32/163). Common roles described  
12 for physicians included prescribing (83/106) and administering (75/106) medications, being  
13 present at death (24/106) and pronouncing death (12/106). The role of nurses was most often  
14 to administer medication (17/35), support the patient (16/35), prepare the route of  
15 administration (13/35) and prepare medications (6/35). Pharmacists' involvement was mainly  
16 to dispense medication (34/35), and also included educating patients regarding the dispensed  
17 drugs (12/35) and securing unused drugs (7/35). Certain studies also discussed the involvement  
18 of other individuals, such as NGO volunteers (Switzerland), other allied health such as child life  
19 specialists, designated MAID coordinators and palliative care consultants. Finally, the role of  
20 family members was occasionally described (21 studies), and included supporting the patient  
21 (17/21), retrieving medications (4/21) and assisting the preparation or administration oral life-  
22 ending medications (3/21).  
23  
24  
25  
26  
27  
28  
29  
30  
31  
32  
33  
34  
35

### 36 *Outcomes and complications of assisted dying*

37  
38 Of the 163 reports found, 40 described outcomes and complications in MAID provision. For IV  
39 administration (n=22), complications included difficulty obtaining or maintaining IV access  
40 (4/22), the patient dying too slowly or not dying (6/22), patient dying too quickly (3/22),  
41 difficulty pushing a large syringe, pain on injection, need for backup kit, and inappropriate drugs  
42 given (1/22 each). For oral administration (n=17), complications included prolonged duration of  
43 the dying process (13/17), vomiting (6/17), myoclonus/seizures (2/17), poor taste of the  
44 cocktail, and the need for IV backup (1/17). One study describing inhalation route described  
45 moor mask fit problems.  
46  
47  
48  
49  
50  
51  
52  
53

## 54 **Discussion**

### *Summary of evidence*

We found 163 published and unpublished reports describing the provision of medical assistance in dying which varied greatly in geographic origin, report type, and items reported. The content of the reports was correspondingly diverse, with a wide variety of medications used for both intravenous and oral routes. Intravenous drugs were usually given in a sequence, with an anxiolytic (most commonly midazolam), followed by a sedative/anesthetic (with or without an opioid) followed by a neuromuscular blocker. Direct cardiotoxic medications (eg. potassium, bupivacaine) were used infrequently, despite the fact that these would be expected to result in a rapid, painless death very shortly after injection. There are several possible reasons for this. Firstly, providers may be unfamiliar with and thus reluctant to use these agents, as outside of MAID, clinicians rarely administer drugs which are designed to stop a patient's heart. Secondly, anticipated discomfort of providers and families with immediate death— "death happened too quickly" was described as a complication in three reports, indicating that even with a planned rapid assisted death, people still expect there to be a "process" of dying after medications are administered. Thirdly, it may be that MAID providers are uncomfortable with the directness of injecting a medication and stopping the patient's heart. Administering a neuromuscular blocker and waiting for a patient to die of CO<sub>2</sub> narcosis or hypoxia maintains some element of "indirectness" to the patient's death. Finally, these medications may be avoided simply because it is not required to directly stop the heart in the presence of deep sedation and anoxia— thus cardiotoxic agents are seen as unnecessary.

The reports we found did not generally link data between medications, locations, providers, and outcomes. As a result it is not possible to determine which medications or combinations of medications are most effective and result in the fewest complications and least distress for patients, providers, and families. However, for providers and health care organizations which provide assisted dying, our scoping review does provide an overview of what the most commonly described practices are, worldwide. There is a need for future research in this area, including understanding patient and family perspectives of what makes a "good" assisted death; descriptions of which complications are most burdensome to patients, families, and providers; consistent definitions and outcome reporting practices of MAID

1  
2  
3 provision; and comprehensive, prospective data collection of clinical practice. Taken together,  
4 this information would allow comparative research between different approaches to MAID, and  
5 allow clinical researchers to identify the medications, dosages, and administration techniques  
6 and procedures which are cost effective, simple to administer and mitigate distress for those  
7 involved.  
8  
9  
10  
11  
12  
13

### 14 *Strengths*

15  
16 Strengths of our scoping review included its very broad and inclusive search strategy, screening  
17 in duplicate by two investigators at both the title/abstract and full-text level. As well, we used a  
18 pre-published protocol which allowed for a peer review and input prior to study completion,  
19 and to ensure that our very broad review accomplished and reported its stated objectives and  
20 outcomes.  
21  
22  
23  
24  
25

### 26 *Limitations*

27  
28 While we described a wide variety of methods for providing MAID, few reports  
29 described the number of times the protocol has been used. Similarly, there are likely to be  
30 differences between what is written in a protocol and what is actually done in practice. It also  
31 does not capture practices which are not formally recorded, either as a publication, or as a  
32 policy or procedure. As a result, our review cannot provide insight into which approaches to  
33 providing aid in dying are most commonly used but only those which are most commonly  
34 described in written form. As well, policies and protocols from older reports may have changed  
35 since their first publication in the medical literature.  
36  
37  
38  
39  
40  
41  
42

43  
44 Our study is also limited by its emphasis on Canadian practice. As most of this review's  
45 authors are Canadian, we were able to gather a larger number of policies and protocols from  
46 Canada, despite vigorous attempts to obtain them from other jurisdictions. The comparatively  
47 small number of protocols from other countries may be related to the development of regional  
48 standardized approaches to MAID provision (eg. the national Dutch Protocol) resulting in a  
49 smaller total number of policies and protocols, and due to a paucity of English-language  
50 protocols and policies. Of note, the Canadian policies and protocols are more recent than those  
51  
52  
53  
54  
55  
56  
57  
58  
59  
60



1  
2  
3 in other countries (eg. The Netherlands, Belgium, Luxembourg, and USA), generally dating back  
4 to the passage of Bill C-14 in June 2016. Canadian policy and practice is likely to undergo further  
5 changes as more experience with MAID is accrued, potentially limiting our report's validity as a  
6 description of current practice. Reassuringly, we have informally reviewed a sample of more  
7 recent Canadian MAID protocols and found there to be little difference. Data from the Fourth  
8 Interim Report on MAID suggests that to date, the vast majority of assisted deaths in Canada  
9 continue to use the intravenous route<sup>2</sup>.  
10  
11  
12  
13  
14  
15  
16  
17

### 18 *Conclusions*

19 We described the published and unpublished literature on MAID provision including common  
20 medications and doses, roles of healthcare professionals and families, and complications that  
21 may cause distress. Future research should aim to identify the medications, dosages, and  
22 administration techniques and procedures, which produce the most predictable outcomes and  
23 mitigate distress for those involved.  
24  
25  
26  
27  
28  
29

### 30 **Disclosures and Acknowledgements**

31 This research is supported by a Hamilton Academic Health Sciences Organization's innovation  
32 fund. Dr. Oczkowski is supported by an internal career award from the Department of Medicine  
33 at McMaster University. Max Zworth is supported by the McMaster Medical Student Research  
34 Excellence Scholarship (MAC RES). Thank you to the numerous MAID providers and health care  
35 organizations which provided us access to their policies and protocols. Thank you to Laura  
36 Banfield, who provided assistance with the electronic search strategies.  
37  
38  
39  
40  
41  
42  
43  
44

### 45 **Competing Interests**

46 None declared.  
47  
48  
49

### 50 **Patient and Public Involvement**

51 This research was done without patient involvement. Patients were not invited to comment on  
52 the study design and were not consulted to develop patient relevant outcomes or interpret the  
53  
54  
55  
56  
57  
58  
59  
60

1  
2  
3 results. Patients were not invited to contribute to the writing or editing of this document for  
4 readability or accuracy.  
5  
6  
7

## 8 9 **Data Availability**

10 The majority of data relevant to this study are included in the article or uploaded as  
11 supplemental information. Additional data are available upon request.  
12  
13

## 14 15 **Author Contributions**

- 16 • Max Zworth assisted with data acquisition and interpretation, manuscript drafting and  
17 revision.
- 18 • Carol Saleh assisted with conception of the study, data acquisition, and revision  
19 Ian Ball assisted with study conception, design and manuscript revision.
- 20 • Gaelen Kalles assisted with study conception, design and manuscript revision.
- 21 • Anatoli Chkaroubo assisted with study conception, design and manuscript revision.
- 22 • Mike Kekewich assisted with study conception, design and manuscript revision.
- 23 • Paul Miller assisted with study conception, design and manuscript revision.
- 24 • Marianne Dees assisted with study conception, design and manuscript revision.
- 25 • Andrea Frolic assisted with study conception, design and manuscript revision.
- 26 • Simon J W Oczkowski assisted with study conception, design, data acquisition, drafting  
27 and revision.  
28  
29  
30  
31  
32

## 33 34 **References**

- 35  
36 1. First Session of the Parliament of Canada. *Bill C-14: an Act to amend the Criminal Code  
37 and to make related amendments to other acts (medical assistance in dying)*. (2016).
- 38 2. Health Canada. *Fourth Interim Report on Medical Assistance in Dying in Canada*. (2019).
- 39  
40 3. Nicol J. Medical Assistance in Dying: The Law in Selected Jurisdictions Outside Canada.  
41 2019.
- 42  
43 4. Harty C, Chaput AJ, Trouton K, Buna D, Naik VN. Oral medical assistance in dying (MAiD):  
44 informing practice to enhance utilization in Canada. *Can J Anaesth*. 2019 Sep;66(9):1106–  
45 12.
- 46  
47 5. Hedberg K, New C. Oregon's Death With Dignity Act: 20 Years of Experience to Inform  
48 the Debate. *Ann Intern Med*. 2017 Sep 19;167.
- 49  
50 6. Hendin, H., Rutenfrans, C. & Zylicz, Z. Physician-Assisted Suicide and Euthanasia in the  
51 Netherlands: Lessons From the Dutch. *JAMA* **277**, 1720–1722 (1997).
- 52  
53  
54 7. Groenewoud, J. H. *et al*. Clinical problems with the performance of euthanasia and  
55 physician-assisted suicide in The Netherlands. *N. Engl. J. Med.* **342**, 551–556 (2000).  
56  
57  
58  
59  
60

- 1
- 2
- 3
- 4 8. Chin AE, Hedberg K, Higginson GK, F. D. Legalized Physician-Assisted Suicide in Oregon —
- 5 The First Year's Experience. *N. Engl. J. Med.* **340**, 83 (1999).
- 6 9. Sullivan, A. D., Hedberg, K. & Fleming, D. W. Legalized Physician-Assisted Suicide in
- 7 Oregon — The Second Year. *N. Engl. J. Med.* **342**, 598–604 (2000).
- 8 10. Ganzini, L. *et al.* Physicians' Experiences with the Oregon Death with Dignity Act. *N. Engl.*
- 9 *J. Med.* **342**, 557–563 (2000).
- 10 11. Government of Canada. Regulations for the Monitoring of Medical Assistance in Dying:
- 11 SOR/2018-166. *Canada Gazette, Part II* 152(16) (2018).
- 12 12. Joanna Briggs Institute. The Joanna Briggs institute reviewers' manual 2015:
- 13 Methodology for JBI scoping reviews. *Aust. Joanna Briggs Inst.* (2015).
- 14 13. Oczkowski, S. J. W. *et al.* The provision of medical assistance in dying: protocol for a
- 15 scoping review. *BMJ Open* **7**, e017888 (2017).
- 16
- 17
- 18
- 19
- 20
- 21
- 22
- 23
- 24
- 25
- 26
- 27
- 28
- 29
- 30
- 31
- 32
- 33
- 34
- 35
- 36
- 37
- 38
- 39
- 40
- 41
- 42
- 43
- 44
- 45
- 46
- 47
- 48
- 49
- 50
- 51
- 52
- 53
- 54
- 55
- 56
- 57
- 58
- 59
- 60

1  
2  
3 **Tables**  
4

5 Table 1: Inclusion and exclusion criteria  
6

7

|                               | <b>Inclusion Criteria</b>                                                                                                                                                                                                                                                               | <b>Exclusion Criteria</b>                                                                                                                                                                                                                                                                                                                                                                      |
|-------------------------------|-----------------------------------------------------------------------------------------------------------------------------------------------------------------------------------------------------------------------------------------------------------------------------------------|------------------------------------------------------------------------------------------------------------------------------------------------------------------------------------------------------------------------------------------------------------------------------------------------------------------------------------------------------------------------------------------------|
| <b>Types of sources</b>       | <p>8<br/>9<br/>10<br/>11<br/>12<br/>13<br/>14<br/>15<br/>16<br/>17<br/>18<br/>19<br/>20</p> Technical report<br>Institutional policy<br>Practice survey<br>Clinical practice guideline/recommendation<br>Case report<br>Observational study<br>Clinical trial                           | <p>Opinion piece/letter</p>                                                                                                                                                                                                                                                                                                                                                                    |
| <b>Types of patients</b>      | <p>21<br/>22<br/>23<br/>24<br/>25<br/>26<br/>27<br/>28<br/>29</p> Adults (age>18 years)<br>Provided informed consent for MAID (assisted suicide or voluntary euthanasia), for any reason                                                                                                | <p>Patients receiving involuntary euthanasia (capital punishment)</p>                                                                                                                                                                                                                                                                                                                          |
| <b>Types of interventions</b> | <p>30<br/>31<br/>32<br/>33<br/>34<br/>35<br/>36<br/>37<br/>38<br/>39<br/>40<br/>41<br/>42<br/>43<br/>44<br/>45<br/>46<br/>47<br/>48<br/>49</p> Provision of assisted suicide or voluntary euthanasia with involvement of a healthcare professional (physician, nurse, pharmacist, etc.) | <p>50<br/>51<br/>52<br/>53<br/>54<br/>55<br/>56<br/>57<br/>58<br/>59<br/>60</p> Assisted suicide or euthanasia without involvement of a health professional<br>Description of assessment/eligibility for MAID alone<br>Description of ethics or acceptability of MAID<br>Non-MAID end-of-life practices, including withdrawing/withholding treatments; palliative sedation; or palliative care |

Table 2: Report setting, study design, and type of MAID protocol

|                                                | Number (% of total studies) |
|------------------------------------------------|-----------------------------|
| <b>Country of study</b>                        |                             |
| Netherlands                                    | 44 (27.0)                   |
| United States                                  | 43 (26.4)                   |
| Belgium                                        | 27 (16.6)                   |
| Canada                                         | 22 (13.5)                   |
| Multi-region                                   | 14 (8.6)                    |
| Switzerland                                    | 8 (4.9)                     |
| Other                                          | 5 (3.1)                     |
| <b>Report type</b>                             |                             |
| Non-systematic review                          | 53 (32.5)                   |
| Survey                                         | 32 (19.6)                   |
| MAID protocol                                  | 19 (11.7)                   |
| Cohort study (retrospective)                   | 22 (13.5)                   |
| Cross sectional (including death certificates) | 13 (8.0)                    |
| Qualitative study                              | 13 (8.0)                    |
| Clinical practice guideline/manual/handbook    | 5 (3.1)                     |
| Systematic review                              | 2 (1.2)                     |
| Other                                          | 4 (2.5)                     |
| <b>Protocol described</b>                      |                             |
| IV                                             | 75 (46)                     |
| Oral                                           | 50 (30.7)                   |
| None                                           | 38 (23.3)                   |

1  
2  
3  
4  
5  
6  
7  
8  
9  
10  
11  
12  
13  
14  
15  
16  
17  
18  
19  
20  
21  
22  
23  
24  
25  
26  
27  
28  
29  
30  
31  
32  
33  
34  
35  
36  
37  
38  
39  
40  
41  
42  
43  
44  
45  
46  
47  
48  
49  
50  
51  
52  
53  
54  
55  
56  
57  
58  
59  
60

For peer review only

Table 3: Medication, doses and frequency encountered for MAID provision by IV medication.

| Description                         | Dose range        | Frequency |
|-------------------------------------|-------------------|-----------|
| <i>Benzodiazepines</i>              |                   |           |
| Benzodiazepine not specified        | PRN               | 14        |
| Diazepam                            | 10-120 mg         | 3         |
| Lorazepam                           | 2.5-5 mg PRN      | 2         |
| Midazolam                           | 2-120 mg, PRN     | 30        |
| <i>Other sedatives</i>              |                   |           |
| Propofol                            | 1000-2000 mg, PRN | 21        |
| Pentobarbital                       | 1-15 g            | 7         |
| Thiopental                          | 1-2 g, 20 mg/kg   | 21        |
| Secobarbital                        | 9 g               | 5         |
| Phenobarbital                       | 3000 mg           | 8         |
| Vesparax                            | Not reported      | 1         |
| Chloral hydrate                     | 35-40 mg          | 1         |
| <i>Neuromuscular blockers</i>       |                   |           |
| Neuromuscular blocker not specified | PRN               | 26        |
| Mivacurium                          | Not reported      | 1         |
| Atracurium                          | 50-100 mg         | 2         |
| Alcuronium                          | 45 g              | 1         |
| Pancuronium, PRN                    | 18-20 mg          | 9         |
| Rocuronium                          | 50-300 mg, PRN    | 17        |
| Cisatracurium                       | 30-40 mg          | 7         |
| Vecuronium                          | 10-60 mg          | 6         |

|                           |               |    |
|---------------------------|---------------|----|
| Curare                    | Not reported  | 3  |
| <i>Opioids</i>            |               |    |
| Opioids NOS               | NA            | 20 |
| Morphine                  | 16 - 480 mg   | 3  |
| Fentanyl                  | 25 - 1500 mcg | 2  |
| <i>Cardiotoxic agents</i> |               |    |
| Potassium chloride        | Not reported  | 3  |
| Bupivacane                | 400 mg        | 2  |
| <i>Local anaesthetics</i> |               |    |
| Lidocaine                 | 40-120 mg     | 20 |
| Magnesium sulphate        | 1000 mg       | 5  |

Table 4: Medication, doses and frequency encountered for MAID provision by oral medication.

| Description                  | Dose range   | Frequency |
|------------------------------|--------------|-----------|
| <i>Barbituates</i>           |              |           |
| Barbituate not specified     | NA           | 17        |
| Pentobarbital                | 9-15 grams   | 21        |
| Phenobarbital                | 20 grams     | 10        |
| Secobarbital                 | 9-15 grams   | 20        |
| Brallobarbitalum             | Not reported | 1         |
| Sodium thiopental            | Not reported | 1         |
| <i>Benzodiazepines</i>       |              |           |
| Benzodiazepine not specified | NA           | 6         |
| Diazepam                     | 1 g          | 3         |



|                                                  |                   |    |
|--------------------------------------------------|-------------------|----|
| Lorazepam                                        | 0.25-2 mg PRN, IV | 3  |
| Midazolam                                        | 10 mg, PRN, IV    | 2  |
| <i>Anti-emetics</i>                              |                   |    |
| Anti-emetic not specified                        | NA                | 8  |
| Metoclopramide                                   | 10-20 mg          | 8  |
| Ondansetron                                      | 8 mg              | 5  |
| Haloperidol                                      | 5 mg, PRN         | 2  |
| <i>Miscellaneous sedatives</i>                   |                   |    |
| Chloral hydrate                                  | 20 g              | 5  |
| <i>Cardiotoxic agents</i>                        |                   |    |
| Digoxin                                          | 50 mg             | 3  |
| Propranolol                                      | 2 g               | 3  |
| <i>Opioids</i>                                   |                   |    |
| Morphine                                         | 15 mg- 3g         | 13 |
| Dextropropoxyphene                               | Not reported      | 2  |
| <i>Neuromuscular blocker (for IV backup use)</i> |                   |    |
| Neuromuscular blocker                            | IV, PRN (backup)  | 11 |

## Figures

Figure 1: PRISMA study selection flow chart

Figure 2: Sample protocols for MAID administration by IV medications, including medications and dose ranges encountered in the scoping review

Figure 3: Sample protocols for MAID administration via oral medications, including medications and dose ranges encountered in the scoping review



From: Moher D, Liberati A, Tetzlaff J, Altman DG, The PRISMA Group (2009). Preferred Reporting Items for Systematic Reviews and Meta-Analyses: The PRISMA Statement. PLoS Med 6(7): e1000097. doi:10.1371/journal.pmed1000097



Figure 2: Sample protocols for MAID administration by IV medications, including medications and dose ranges encountered in the scoping review



Figure 3: Sample protocols for MAID administration via oral medications, including medications and dose ranges encountered in the scoping review

## Supplementary File 1: MAID Scoping Review Search Strategies

*OVID Medline Epub Ahead of Print, In-Process & Other Non-Indexed Citations, OVID MEDLINE(R) Daily and OVID MEDLINE(R) 1946 to Present - June 16, 2017*

|                                                                                                                                |        |
|--------------------------------------------------------------------------------------------------------------------------------|--------|
| 1. right to die.ti,ab,kf. or Right to Die/                                                                                     | 5226   |
| 2. ((medical* aid* or medical* assist*) adj2 (dying or die or death*)).ti,ab,kf.                                               | 50     |
| 3. ((physician* assist* or physician aid* or doctor* assist* or doctor aid*) adj2 (death* or dying or die)).ti,ab,kf.          | 442    |
| 4. end of life choice*.ti,ab,kf.                                                                                               | 64     |
| 5. Euthanasia, Active, Voluntary/ or Euthanasia, Active/                                                                       | 3366   |
| 6. euthanasia.ti,ab,kf.                                                                                                        | 21294  |
| 7. Suicide, Assisted/                                                                                                          | 5337   |
| 8. assisted suicide*.ti,ab,kf.                                                                                                 | 2884   |
| 9. assisted death*.ti,ab,kf.                                                                                                   | 405    |
| 10. practice patterns, physicians/ or patient care guideline/ or guideline/ or (guideline* or guidance or consensus).ti,ab,kf. | 516025 |
| 11. pharmacist/ or physician/ or nurse/                                                                                        | 124347 |
| 12. patient care management/                                                                                                   | 2992   |
| 13. medication therapy management/                                                                                             | 1299   |
| 14. (medication utilization or medication therap* or "medication use" or medication*).ti,ab,kf.                                | 262031 |
| 15. drug delivery systems/                                                                                                     | 49065  |
| 16. drug administration routes/                                                                                                | 5309   |
| 17. administration, oral/                                                                                                      | 131323 |
| 18. administration, intravenous/                                                                                               | 5358   |
| 19. injections/                                                                                                                | 40348  |
| 20. (drug delivery or drug administration or bolus or inject*).ti,ab,kw.                                                       | 788480 |
| 21. Analgesics, Opioid/                                                                                                        | 35560  |
| 22. opi*.ti,ab,kf.                                                                                                             | 186417 |
| 23. Neuromuscular Blocking Agents/                                                                                             | 3299   |
| 24. (paraly* or neuromuscular block*).ti,ab,kf.                                                                                | 66603  |

|                                                                                                                                      |         |
|--------------------------------------------------------------------------------------------------------------------------------------|---------|
| 25. "Hypnotics and Sedatives"/                                                                                                       | 27048   |
| 26. (hypno* or sedat* or an?ssthe*).ti,ab,kf.                                                                                        | 506435  |
| 27. Drug Prescriptions/                                                                                                              | 25165   |
| 28. (prescribe* or prescription*).ti,ab,kf.                                                                                          | 156126  |
| 29. drug utilization/ or "drug utilization review"/                                                                                  | 22289   |
| 30. (drug utili?ation or drug therap* or "drug use").ti,ab,kf.                                                                       | 89717   |
| 31. drug therapy/                                                                                                                    | 29902   |
| 32. 1 or 2 or 3 or 4 or 5 or 6 or 7 or 8 or 9                                                                                        | 26210   |
| 33. 10 or 11 or 12 or 13 or 14 or 15 or 16 or 17 or 18 or 19 or 20 or 21 or 22 or 23 or 24 or 25 or 26 or 27 or 28 or 29 or 30 or 31 | 2433657 |
| 34. 32 and 33                                                                                                                        | 6324    |
| 35. 34 not animals/                                                                                                                  | 5325    |

#### EMBASE - 1974 to 2017 June 14

|                                                                                                                                             |        |
|---------------------------------------------------------------------------------------------------------------------------------------------|--------|
| 1. euthanasia/ or active euthanasia/ or voluntary euthanasia/                                                                               | 14939  |
| 2. assisted suicide/                                                                                                                        | 4550   |
| 3. ((medical* aid* or medical* assist*) adj2 (dying or die or death*)).ti,ab,kf.                                                            | 57     |
| 4. ((physician* assist* or physician aid* or doctor* assist* or doctor aid*) adj2 (death* or dying or die)).ti,ab,kf.                       | 435    |
| 5. right to die/ or right to die.ti,ab,kw.                                                                                                  | 4339   |
| 6. end of life choice*.ti,ab,kw.                                                                                                            | 73     |
| 7. euthanasia.ti,ab,kw.                                                                                                                     | 11853  |
| 8. (assisted suicide* or assisted death*).ti,ab,kw.                                                                                         | 3348   |
| 9. clinical practice/ or medical practice/ or professional practice/ or practice guideline/                                                 | 616940 |
| 10. (clinical practice or medical practice or professional practice or practice guideline or guideline* or guidance or consensus).ti,ab,kw. | 835272 |
| 11. patient care/ or management/                                                                                                            | 292402 |
| 12. (patient care or patient management).ti,ab,kw.                                                                                          | 91135  |
| 13. prescription/ or pharmacist/ or medication therapy management/ or drug therapy/                                                         | 646407 |

|                                                                                                                                                      |         |
|------------------------------------------------------------------------------------------------------------------------------------------------------|---------|
| 14. (prescri* or pharmac* or medic* therap* or drug therapy).ti,ab,kw.                                                                               | 1238500 |
| 15. drug delivery system/ or drug administration/ or oral drug administration/ or intravenous drug administration/ or bolus injection/ or injection/ | 946330  |
| 16. (drug delivery or drug administration or bolus or inject*).ti,ab,kw.                                                                             | 998587  |
| 17. neuromuscular blocking agent/                                                                                                                    | 7115    |
| 18. (paraly* or neuromuscular block*).ti,ab,kf.                                                                                                      | 71322   |
| 19. opiate/                                                                                                                                          | 65315   |
| 20. opioi*.ti,ab,kf.                                                                                                                                 | 92154   |
| 21. hypnotic agent/                                                                                                                                  | 10032   |
| 22. (hypno* or sedat* or an?ssthe*).ti,ab,kf.                                                                                                        | 384836  |
| 23. 1 or 2 or 3 or 4 or 5 or 6 or 7 or 8                                                                                                             | 24284   |
| 24. 9 or 10 or 11 or 12 or 13 or 14 or 15 or 16 or 17 or 18 or 19 or 20 or 21 or 22                                                                  | 4722340 |
| 25. 23 and 24                                                                                                                                        | 5844    |
| 26. 25 not animals/                                                                                                                                  | 5550    |

**+ 365 updated to February 18, 2020**

*PsychINFO - 1806 to June Week 2 2017*

|                                                                                                                       |        |
|-----------------------------------------------------------------------------------------------------------------------|--------|
| 1. *assisted suicide/ or euthanasia/                                                                                  | 1975   |
| 2. (assisted suicide or assisted death).mp.                                                                           | 1468   |
| 3. *euthanasia/                                                                                                       | 1265   |
| 4. euthanasia.mp.                                                                                                     | 2176   |
| 5. ((medical* aid* or medical* assist*) adj2 (dying or die or death*).ti,ab,kf.                                       | 16     |
| 6. ((physician* assist* or physician aid* or doctor* assist* or doctor aid*) adj2 (death* or dying or die)).ti,ab,kf. | 176    |
| 7. end of life choice*.mp.                                                                                            | 32     |
| 8. right to die.mp.                                                                                                   | 240    |
| 9. exp Clinical Practice/ or exp Health Care Services/ or exp Caring Behaviours/ or exp Treatment Guideline/          | 120988 |



|                                                                                                                                                                                                                                                |         |
|------------------------------------------------------------------------------------------------------------------------------------------------------------------------------------------------------------------------------------------------|---------|
| 10. (clinical practice* or health care or medical care or treatment* or clinical practice* or medical practice* guideline* or guidance or consensus).mp.                                                                                       | 812357  |
| 11. drugs/ or drug dosages/ or "prescribing (drugs)"/ or self-medication/ or injections/ or drug administration methods/ or intravenous injections/ or drug self administration/ or Drug Therapy/                                              | 163484  |
| 12. (drug delivery or drug administration or bolus or injection or medication utilisation or medical utilization or medication therapy or medication or prescribe or prescription or drug utilisation or drug utilization or drug therapy).mp. | 203881  |
| 13. exp Clinicians/ or exp Nurse/ or exp Physicians/ or exp Pharmacists/                                                                                                                                                                       | 49394   |
| 14. exp HYPNOTIC DRUGS/                                                                                                                                                                                                                        | 5599    |
| 15. (hypno* or sedat*).mp.                                                                                                                                                                                                                     | 30936   |
| 16. exp ANALGESIC DRUGS/                                                                                                                                                                                                                       | 17811   |
| 17. opi*.mp.                                                                                                                                                                                                                                   | 77671   |
| 18. exp ANESTHETIC DRUGS/                                                                                                                                                                                                                      | 19333   |
| 19. an?sthe*.mp.                                                                                                                                                                                                                               | 13116   |
| 20. exp Muscle Relaxing Drugs/ or exp Cholinergic Receptors/ or exp Synapses/ or exp Neurotransmission/ or exp Paralysis/                                                                                                                      | 36296   |
| 21. (paraly* or neuromuscular block*).mp.                                                                                                                                                                                                      | 6790    |
| 22. 1 or 2 or 3 or 4 or 5 or 6 or 7 or 8                                                                                                                                                                                                       | 3043    |
| 23. 9 or 10 or 11 or 12 or 14 or 15 or 16 or 17 or 18 or 19 or 20 or 21                                                                                                                                                                        | 1038761 |
| 24. 22 and 23                                                                                                                                                                                                                                  | 1603    |
| 25. 24 not animals/                                                                                                                                                                                                                            | 1600    |

### Central- May 2017

|                                                                                                                 |   |
|-----------------------------------------------------------------------------------------------------------------|---|
| 1. right to die.mp. or Right to Die/                                                                            | 4 |
| 2. ((medical* aid* or medical* assist*) adj2 (dying or die or death*)).mp.                                      | 0 |
| 3. ((physician* assist* or physician aid* or doctor* assist* or doctor aid*) adj2 (death* or dying or die)).mp. | 1 |
| 4. end of life choice*.mp.                                                                                      | 1 |
| 5. Euthanasia, Active, Voluntary/ or Euthanasia, Active/                                                        | 3 |

|                                                                                                                                |        |
|--------------------------------------------------------------------------------------------------------------------------------|--------|
| 6. euthanasia.ti,ab,kf.                                                                                                        | 44     |
| 7. Suicide, Assisted/                                                                                                          | 0      |
| 8. assisted suicide*.ti,ab,kf.                                                                                                 | 3      |
| 9. assisted death*.ti,ab,kf.                                                                                                   | 0      |
| 10. practice patterns, physicians/ or patient care guideline/ or guideline/ or (guideline* or guidance or consensus).ti,ab,kf. | 23569  |
| 11. pharmacist/ or physician/ or nurse/                                                                                        | 3      |
| 12. patient care management/                                                                                                   | 104    |
| 13. medication therapy management/                                                                                             | 58     |
| 14. (medication utilization or medication therap* or "medication use" or medication*).ti,ab,kf.                                | 46253  |
| 15. drug delivery systems/                                                                                                     | 834    |
| 16. drug administration routes/                                                                                                | 312    |
| 17. administration, oral/                                                                                                      | 20558  |
| 18. administration, intravenous/                                                                                               | 490    |
| 19. injections/                                                                                                                | 2311   |
| 20. (drug delivery or drug administration or bolus or inject*).ti,ab,kw.                                                       | 140195 |
| 21. Analgesics, Opioid/                                                                                                        | 5705   |
| 22. opi*.ti,ab,kf.                                                                                                             | 18444  |
| 23. Neuromuscular Blocking Agents/                                                                                             | 250    |
| 24. (paraly* or neuromuscular block*).ti,ab,kf.                                                                                | 4273   |
| 25. "Hypnotics and Sedatives"/                                                                                                 | 3052   |
| 26. (hypno* or sedat* or an?sthe*).ti,ab,kf.                                                                                   | 54931  |
| 27. Drug Prescriptions/                                                                                                        | 419    |
| 28. (prescribe* or prescription*).ti,ab,kf.                                                                                    | 15186  |
| 29. drug utilization/ or "drug utilization review"/                                                                            | 443    |
| 30. (drug utilization or drug therap* or "drug use").ti,ab,kf.                                                                 | 283688 |
| 31. drug therapy/                                                                                                              | 300    |
| 32. 1 or 2 or 3 or 4 or 5 or 6 or 7 or 8 or 9                                                                                  | 49     |

|                                                                                                                                      |        |
|--------------------------------------------------------------------------------------------------------------------------------------|--------|
| 33. 10 or 11 or 12 or 13 or 14 or 15 or 16 or 17 or 18 or 19 or 20 or 21 or 22 or 23 or 24 or 25 or 26 or 27 or 28 or 29 or 30 or 31 | 389871 |
| 34. 32 and 33                                                                                                                        | 23     |
| 35. 34 not animals/                                                                                                                  | 20     |

*CINAHL - 1981 to June 16, 2017*

|                                                                                                                                                                                                                                      |        |
|--------------------------------------------------------------------------------------------------------------------------------------------------------------------------------------------------------------------------------------|--------|
| S1. (MH "Right to Die") OR "right to die"                                                                                                                                                                                            | 1405   |
| S2. (("medical* aid*" or "medical* assist*") N2 ("dying" or "die" or "death*"))                                                                                                                                                      | 52     |
| S3. "end of life choice*"                                                                                                                                                                                                            | 49     |
| S4. (MH "Euthanasia+") OR "euthanasia"                                                                                                                                                                                               | 5844   |
| S5. (MH "Suicide, Assisted") OR "assisted suicide"                                                                                                                                                                                   | 2785   |
| S6. "assisted death*" or "assisted dying"                                                                                                                                                                                            | 543    |
| S7. (("physician* assist*" or "physician aid*" or "doctor* assist*" or "doctor aid*") N2 ("death*" or "dying" or "die"))                                                                                                             | 243    |
| S8.(MH "Practice Patterns") OR (MH "Prescribing Patterns") OR (MH "Medical Practice")                                                                                                                                                | 12815  |
| S9. (MH "Patient Care Plans") OR "patient care management"                                                                                                                                                                           | 3773   |
| S10. (MH "Medication Management") OR "medication therapy"                                                                                                                                                                            | 350    |
| S11. (MH "Drugs, Prescription") OR (MH "Prescriptions, Drug") OR "drug prescription"                                                                                                                                                 | 16355  |
| S12. (MH "Drug Utilization") OR "drug utilization"                                                                                                                                                                                   | 4434   |
| S13."prescribe*" or "prescription*"                                                                                                                                                                                                  | 46349  |
| S14. (MH "Drug Therapy+") OR "drug therapy" OR (MH "Drug Therapy, Combination+")                                                                                                                                                     | 312444 |
| S15. (MH "Drug Administration Routes") OR "drug administration routes" OR (MH "Administration, Intravenous") OR (MH "Self Administration") OR (MH "Administration, Oral")                                                            | 14588  |
| S16. (MH "Analgesics, Opioid+") OR (MH "Narcotics+") OR "opi*"                                                                                                                                                                       | 51110  |
| S17. (MH "Neuromuscular Nondepolarizing Agents+") OR (MH "Neuromuscular Blocking Agents+") OR (MH "Neuromuscular Depolarizing Agents+") OR (MH "Neuromuscular Agents+") OR (MH "Neuromuscular Blockade") OR "neuromuscular blockers" | 4704   |

|                                                                                                                                                                               |        |
|-------------------------------------------------------------------------------------------------------------------------------------------------------------------------------|--------|
| S18. (MH "Hypnotics and Sedatives+") OR "hypnotic*" OR "sedat*" OR (MH "Sedatives, Barbiturate+") OR (MH "Sedatives, Nonbarbiturate+") OR (MH "Sedation") OR (MH "Midazolam") | 15810  |
| S19. S1 OR S2 OR S3 OR S4 OR S5 OR S6 OR S7                                                                                                                                   | 8368   |
| S20. S8 OR S9 OR S10 OR S11 OR S12 OR S13 OR S14 OR S15 OR S16 OR S17 OR S18                                                                                                  | 404373 |
| S21. S19 AND S20                                                                                                                                                              | 1234   |

For peer review only

## Supplementary File 2: MAID scoping review data items

| Report characteristics               | Description                                                                                                                                                                                                                                                                        |
|--------------------------------------|------------------------------------------------------------------------------------------------------------------------------------------------------------------------------------------------------------------------------------------------------------------------------------|
| Type of study                        | Technical report, practice survey, clinical practice guideline, observational study, clinical trial, other (describe)                                                                                                                                                              |
| Journal / Publication location       |                                                                                                                                                                                                                                                                                    |
| Author, year                         | Profession and/or specialization                                                                                                                                                                                                                                                   |
| Origin of report                     | Jurisdiction of report (eg. country, state)                                                                                                                                                                                                                                        |
| Organization                         |                                                                                                                                                                                                                                                                                    |
| Report purpose                       | Stated or inferred                                                                                                                                                                                                                                                                 |
| Report audience                      | Stated or inferred                                                                                                                                                                                                                                                                 |
| MAID provision: medications          | Description                                                                                                                                                                                                                                                                        |
| Pharmaceuticals used – IV protocol   | Each pharmaceutical name, dose, route, frequency, speed of administration, stated or inferred purpose of each medication (eg. anxiolytic, sedation, pain control, antiemetic, paralytic) and frequency of use (optional vs obligatory); alternative medications in case of allergy |
| Pharmaceuticals used – Oral protocol | As above                                                                                                                                                                                                                                                                           |
| Other equipment used                 | If relevant                                                                                                                                                                                                                                                                        |
| Safety checks and documentation      | eg. use of a checklist; confirmation of consent; backup medications available, etc.                                                                                                                                                                                                |
| MAID provision: location             | Description                                                                                                                                                                                                                                                                        |
| Location of MAID provision           | Home, hospital, hospice, other, nursing home, self administration or voluntary euthanasia                                                                                                                                                                                          |
| MAID provision: participants         | Description                                                                                                                                                                                                                                                                        |
| Role of healthcare providers         | Profession, training/expertise, role in assisted dying                                                                                                                                                                                                                             |
| Role of families                     | Training/preparation; follow up care; bereavement care                                                                                                                                                                                                                             |

1  
2  
3  
4  
5  
6  
7  
8  
9  
10  
11  
12  
13  
14  
15  
16  
17  
18  
19  
20  
21  
22  
23  
24  
25  
26  
27  
28  
29  
30  
31  
32  
33  
34  
35  
36  
37  
38  
39  
40  
41  
42  
43  
44  
45  
46  
47  
48  
49  
50  
51  
52  
53  
54  
55  
56  
57  
58  
59  
60

For peer review only

1  
2  
3 Supplemental file 3: List of studies included in the scoping review  
4

- 5  
6 1. The nurse's responsibility to the patient requesting assisted suicide. *Oncologic Nursing Society. Oncol Nurs Forum.* 2001 Apr;28(3):442.  
7  
8  
9 2. Baron CH, Bergstresser C, Brock DW, Cole GF, Dorfman NS, Johnson JA, et al. A model  
10 state act to authorize and regulate physician-assisted suicide. *Harvard J Legis.*  
11 1996;33(1):1–34.  
12  
13 3. Boissinot L, Benamou M, Léglise P, Mancret R-C, Huchon-Bécel D. [Euthanasia and / or  
14 medically assisted suicide: Reflection on the new responsibility of the hospital  
15 pharmacist]. *Ann Pharm Françaises [Internet].* 2014;72(2):82–9. Available from:  
16 <http://www.sciencedirect.com/science/article/pii/S0003450913001582>  
17  
18  
19 4. Burette P, Bouüaert C, Vanmeerbeek M, Giet D. Quatre ans d'application de la loi de  
20 dépenalisation de l'euthanasie en Belgique. *Press Medicale [Internet].* 2008;37(9):1281–8.  
21 Available from: <http://www.sciencedirect.com/science/article/pii/S0755498208000778>  
22  
23  
24 5. Chambaere K, Vander Stichele R, Mortier F, Cohen J, Deliëns L. Recent trends in  
25 euthanasia and other end-of-life practices in Belgium. *N Engl J Med.* 2015; 372: 1179–81.  
26  
27  
28 6. Chin AE, Hedberg K, Higginson GK, Fleming DW. Legalized physician-assisted suicide  
29 in Oregon--the first year's experience. *N Engl J Med.* 1999 Feb;340(7):577–83.  
30  
31  
32 7. de Boer A, Sang Lau H, Porsius A. Physician-assisted death and pharmacy practice in the  
33 Netherlands. *N Engl J Med.* 1997 Oct; 337(15):1091–2.  
34  
35  
36 8. Detry O, Laureys S, Faymonville M-E, De Roover A, Squifflet J-P, Lamy M, et al. Organ  
37 donation after physician-assisted death. *Transpl Int.* 2008 Sep; 21(9):915.  
38  
39  
40 9. Dierckx de Casterle B, Denier Y, De Bal N, Gastmans C. Nursing care for patients  
41 requesting euthanasia in general hospitals in Flanders, Belgium. *J Adv Nurs.* 2010 Nov;  
42 66(11): 2410–20.  
43  
44  
45 10. Enck RE. Physician-assisted dying. *The American Journal of Hospice & Palliative Care.*  
46 2010; 27(7): 441–3.  
47  
48  
49 11. Groenewoud JH, van der Heide A, Onwuteaka-Philipsen BD, Willems DL, van der Maas  
50 PJ, van der Wal G. Clinical problems with the performance of euthanasia and physician-  
51 assisted suicide in The Netherlands. *N Engl J Med.* 2000 Feb; 342(8): 551–6.  
52  
53  
54 12. Hopkins D, Boss M. Pharmacists' Right to Refuse to Dispense Prescriptions Based on  
55 Moral Grounds: A Summary of State Laws and Regulations. *Hosp Pharm [Internet].* 2006  
56 Dec 1;41(12): 1176–9. Available from: <https://doi.org/10.1310/hpj4112-1176>  
57  
58  
59

13. Lewis P. Euthanasia in Belgium five years after legalisation. *Eur J Health Law*. 2009 Jun;16(2):125–38.
14. Loggers ET, Starks H, Shannon-Dudley M, Back AL, Appelbaum FR, Stewart FM. Implementing a Death with Dignity program at a comprehensive cancer center. *N Engl J Med*. 2013 Apr;368(15):1417–24.
15. Meek C. Pharmacy involvement where assisted suicide and euthanasia are permitted. *Pharm J*. 2006;277:614.
16. Meier DE, Emmons CA, Wallenstein S, Quill T, Morrison RS, Cassel CK. A national survey of physician-assisted suicide and euthanasia in the United States. *N Engl J Med*. 1998 Apr;338(17):1193–201.
17. Ogden R. The right to die: a policy proposal for euthanasia and aid in dying. *Can Public Policy*. 1994 Mar;20(1):1–25.
18. Pereira J, Laurent P, Cantin B, Petremand D, Currat T. The response of a Swiss university hospital's palliative care consult team to assisted suicide within the institution. *Palliat Med*. 2008 Jul;22(5):659–67.
19. Rurup ML, Onwuteaka-Philipsen BD, Heide A va. der, Wal G va. der, Maas PJ va. der. [Trends in means used in euthanasia and coherence with it number of notifications]. *Dutch J Med*. 2006;18(150):11.
20. Smith KA, Goy ER, Harvath TA, Ganzini L. Quality of death and dying in patients who request physician-assisted death. *Palliat Med*. 2011 Apr;14(4):445–50.
21. van der Arend AJ. Euthanasia and assisted suicide in The Netherlands: clarifying the practice and the nurse's role. *Int Nurs Rev*. 1998;45(5):145–51.
22. Vander Stichele RH, Bilsen JJR, Bernheim JL, Mortier F, Deliens L. Drugs used for euthanasia in Flanders, Belgium. *Pharmacoepidemiol Drug Saf*. 2004 Feb;13(2):89–95.
23. Werth JLJ, Wineberg H. A critical analysis of criticisms of the Oregon Death with Dignity Act. *Death Stud*. 2005;29(1):1–27.
24. Final report of the Netherlands State Commission on Euthanasia: an English summary. *Bioethics*. 1987 Apr;1(2):163–74.
25. Asch DA. The role of critical care nurses in euthanasia and assisted suicide. *N Engl J Med*. 1996 May;334(21):1374–9.
26. Benrubi GI. Euthanasia--the need for procedural safeguards. *N Engl J Med*. 1992 Jan;326(3):197–9.



- 1
- 2
- 3
- 4 27. Bilsen JJR, Vander Stichele RH, Mortier F, Deliens L. Involvement of nurses in
- 5 physician-assisted dying. *J Adv Nurs*. 2004 Sep;47(6):583–91.
- 6
- 7 28. Bosshard G, Fischer S, Bar W. Open regulation and practice in assisted dying. *Swiss Med*
- 8 *Wkly*. 2002 Oct;132(37–38):527–34.
- 9
- 10 29. Bosshard G, Ulrich E, Bar W. 748 cases of suicide assisted by a Swiss right-to-die
- 11 organisation. *Swiss Med Wkly*. 2003 May;133(21–22):310–7.
- 12
- 13 30. Chabot BE, Goedhart A. A survey of self-directed dying attended by proxies in the Dutch
- 14 population. *Soc Sci Med*. 2009 May;68(10):1745–51.
- 15
- 16
- 17 31. De Beer T, Gastmans C, Dierckx de Casterle B. Involvement of nurses in euthanasia: a
- 18 review of the literature. *J Med Ethics*. 2004 Oct;30(5):494–8.
- 19
- 20 32. Emanuel EJ, Daniels ER, Fairclough DL, Clarridge BR. The practice of euthanasia and
- 21 physician-assisted suicide in the United States: adherence to proposed safeguards and
- 22 effects on physicians. *JAMA*. 1998 Aug;280(6):507–13.
- 23
- 24
- 25 33. Ganzini L, Goy ER, Dobscha SK, Prigerson H. Mental health outcomes of family
- 26 members of Oregonians who request physician aid in dying. *J Pain Symptom Manage*.
- 27 2009 Dec;38(6):807–15.
- 28
- 29
- 30 34. Hall JK. Assisted suicide: nurse practitioners as providers? *Nurse Pract*. 1996
- 31 Oct;21(10):63-66,71.
- 32
- 33 35. Hedberg K, Hopkins D, Kohn M. Five years of legal physician-assisted suicide in Oregon.
- 34 Vol. 348, *The New England journal of medicine*. United States; 2003. p. 961–4.
- 35
- 36 36. Hedberg K, Hopkins D, Southwick K. Legalized physician-assisted suicide in Oregon,
- 37 2001. Vol. 346, *The New England journal of medicine*. United States; 2002. p. 450–2.
- 38
- 39
- 40 37. Inghelbrecht E, Bilsen J, Mortier F, Deliens L. The role of nurses in physician-assisted
- 41 deaths in Belgium. *CMAJ*. 2010 Jun;182(9):905–10.
- 42
- 43 38. Lossignol D, Libert I, Michel B, Dumitrescu C, Obiols M, Rosseau C. End of life
- 44 decision, euthanasia, in a belgian supportive care unit. Abstracts of the 2011 International
- 45 MASCC/ISOO (Multinational Association of Supportive Care in Cancer/International
- 46 Society for Oral Oncology) Symposium. June 23-25, 2011. Athens, Greec. *Supportive*
- 47 *Care in Cancer*. 2011. 19 (Suppl 2):S67-370.
- 48
- 49
- 50
- 51
- 52
- 53
- 54
- 55
- 56
- 57
- 58
- 59
- 60

- 1
- 2
- 3 39. Matzo ML, Emanuel EJ. Oncology nurses' practices of assisted suicide and patient-
- 4 requested euthanasia. *Oncol Nurs Forum*. 1997;24(10):1725–32.
- 5
- 6 40. Meier DE, Emmons C-A, Litke A, Wallenstein S, Morrison RS. Characteristics of patients
- 7 requesting and receiving physician-assisted death. *Arch Intern Med*. 2003
- 8 Jul;163(13):1537–42.
- 9
- 10 41. Naafs NJ. Pharmaceutical care until the end: the role of pharmacists in euthanasia in The
- 11 Netherlands. *Pharm World Sci*. 2001 Aug;23(4):129–31.
- 12
- 13 42. O'Brien CN, Madek GA, Ferrera GR. Oregon's guidelines for physician-assisted suicide:
- 14 a legal and ethical analysis. *Univ Pittsbg Law Rev*. 2000;61(2):329–65.
- 15
- 16 43. Onwuteaka-Philipsen BD, Muller MT, van der Wal G. Euthanatics: implementation of a
- 17 protocol to standardise euthanatics among pharmacists and GPs. *Patient Educ Couns*.
- 18 1997 Jun;31(2):131–7.
- 19
- 20 44. Onwuteaka-Philipsen BD, Muller MT, van der Wal G, van Eijk JT, Ribbe MW. Active
- 21 voluntary euthanasia or physician-assisted suicide? *J Am Geriatr Soc*. 1997
- 22 Oct;45(10):1208–13.
- 23
- 24 45. Onwuteaka-Philipsen BD, Muller MT, van der Wal G, van Eijk JT, Ribbe MW. Attitudes
- 25 of Dutch general practitioners and nursing home physicians to active voluntary euthanasia
- 26 and physician-assisted suicide. *Arch Fam Med*. 1995 Nov;4(11):951–5.
- 27
- 28 46. Onwuteaka-Philipsen BD, van der Wal G. Cases of euthanasia and physician assisted
- 29 suicide among AIDS patients reported to the Public Prosecutor in North Holland. *Public*
- 30 *Health*. 1998 Jan;112(1):53–6.
- 31
- 32 47. Rurup ML, Smets T, Cohen J, Bilsen J, Onwuteaka-Philipsen BD, Deliens L. The first
- 33 five years of euthanasia legislation in Belgium and the Netherlands: description and
- 34 comparison of cases. *Palliat Med*. 2012 Jan;26(1):43–9.
- 35
- 36 48. Spencer DE. Practical implications for health care providers in a physician-assisted
- 37 suicide environment. *Seattle Univ law Rev*. 1995;18(3):545–56.
- 38
- 39 49. Swarte NB, Heintz AP. Euthanasia and physician-assisted suicide. *Ann Med*. 1999
- 40 Dec;31(6):364–71.
- 41
- 42 50. Swarte NB, Heintz AP. Guidelines for an acceptable euthanasia procedure. *Best Pract Res*
- 43 *Clin Obstet Gynaecol*. 2001 Apr;15(2):313–21.
- 44
- 45 51. van Bruchem-van de Scheur GG, van der Arend AJG, Spreuwenberg C, Abu-Saad HH,
- 46 ter Meulen RHJ. Euthanasia and physician-assisted suicide in the Dutch homecare sector:
- 47 the role of the district nurse. *J Adv Nurs*. 2007 Apr;58(1):44–52.
- 48
- 49
- 50
- 51
- 52
- 53
- 54
- 55
- 56
- 57
- 58
- 59
- 60

- 1  
2  
3 52. van de Scheur A, van der Arend A. The role of nurses in euthanasia: a Dutch study. *Nurs Ethics*. 1998 Nov;5(6):497–508.  
4  
5  
6  
7 53. van der Kloot Meijburg HH. How health care institutions in the Netherlands approach  
8 physician assisted death. *Omega*. 32(3):179–96.  
9  
10 54. van der Maas PJ, van der Wal G, Haverkate I, de Graaff CL, Kester JG, Onwuteaka-  
11 Philipsen BD, et al. Euthanasia, physician-assisted suicide, and other medical practices  
12 involving the end of life in the Netherlands, 1990-1995. *N Engl J Med*. 1996  
13 Nov;335(22):1699–705.  
14  
15  
16 55. van der Wal G, van Eijk JT, Leenen HJ, Spreeuwenberg C. [The use of drugs for  
17 euthanasia and assisted suicide in family practice]. *Ned Tijdschr Geneesk*. 1992  
18 Jul;136(27):1299–305.  
19  
20 56. Varadarajan R, Freeman RA, Parmar JR. Aid-in-dying practice in Europe and the United  
21 States: Legal and ethical perspectives for pharmacy. *Res Social Adm Pharm*. 2016  
22 Nov;12(6):1016–25.  
23  
24  
25 57. Willems DL, Groenewoud JH, van der Wal G. Drugs used in physician-assisted death.  
26 *Drugs Aging*. 1999 Nov;15(5):335–40.  
27  
28  
29 58. Bollen J, de Jongh W, Hagens J, van Dijk G, Ten Hoopen R, Ysebaert D, et al. Organ  
30 Donation After Euthanasia: A Dutch Practical Manual. *Am J Transplant*. 2016  
31 Jul;16(7):1967–72.  
32  
33 59. Bilsen J, Bauwens M, Bernheim J, Stichele R Vander, Deliens L. Physician-assisted  
34 death: attitudes and practices of community pharmacists in East Flanders, Belgium. *Palliat*  
35 *Med*. 2005 Mar;19(2):151–7.  
36  
37  
38 60. Blanke C, LeBlanc M, Hershman D, Ellis L, Meyskens F. Characterizing 18 Years of the  
39 Death With Dignity Act in Oregon. *JAMA Oncol*. 2017 Oct;3(10):1403–6.  
40  
41 61. Boissinot L, Benamou M, Leglise P, Mancret R-C, Huchon-Becel D. [Euthanasia and/or  
42 medically assisted suicide: Reflection on the new responsibility of the hospital  
43 pharmacist]. *Ann Pharm Fr*. 2014 Mar;72(2):82–9.  
44  
45  
46 62. Bosshard G. [Assisted suicide - medical, legal, and ethical aspects]. *Praxis (Bern 1994)*.  
47 2012 Feb;101(3):183–9.  
48  
49 63. Bosshard G, Zellweger U, Bopp M, Schmid M, Hurst SA, Puhan MA, et al. Medical End-  
50 of-Life Practices in Switzerland: A Comparison of 2001 and 2013. *JAMA Intern Med*.  
51 2016 Apr;176(4):555–6.  
52  
53  
54  
55  
56  
57  
58  
59  
60

- 1  
2  
3 64. Campbell CS, Cox JC. Hospice-assisted death? A study of Oregon hospices on death with  
4 dignity. *Am J Hosp Palliat Care*. 2012 May;29(3):227–35.  
5  
6  
7 65. Chambaere K, Bilsen J, Cohen J, Onwuteaka-Philipsen BD, Mortier F, Deliens L.  
8 Physician-assisted deaths under the euthanasia law in Belgium: a population-based survey.  
9 *CMAJ*. 2010 Jun;182(9):895–901.  
10  
11 66. Cohen-Almagor R, Hartman MG. The Oregon Death with Dignity Act: review and  
12 proposals for improvement. *J Legis*. 2001;27(2):269–98.  
13  
14 67. Crouch BI. Toxicological Issues with Drugs Used to End Life. *J Pharm Care Pain*  
15 *Symptom Control* [Internet]. 1996 Jan 1;4(1–2):211–22. Available from:  
16 [https://doi.org/10.1300/J088v04n01-2\\_04](https://doi.org/10.1300/J088v04n01-2_04)  
17  
18  
19 68. Dunn P, Reagan B, Tolle SW, Foreman S. The Oregon Death with Dignity Act: A  
20 Guidebook for Health Care Providers, edited by Kathleen Haley and Melinda Lee. The  
21 Task Force to Improve the Care of Terminally-Ill Oregonians. United States; 2008 Jul.  
22  
23 69. Emanuel EJ, Fairclough D, Clarridge BC, Blum D, Bruera E, Penley WC, et al. Attitudes  
24 and practices of U.S. oncologists regarding euthanasia and physician-assisted suicide. *Ann*  
25 *Intern Med*. 2000 Oct;133(7):527–32.  
26  
27 70. Emanuel EJ. Euthanasia and physician-assisted suicide: a review of the empirical data  
28 from the United States. *Arch Intern Med*. 2002 Jan;162(2):142–52.  
29  
30 71. Englert M. Depenalized practice of euthanasia in Belgium: evolution from 2002 to 2005  
31 and interpretation of differences between the North and South of the country. *Med J*  
32 *Brussels*. 2007;28:423–30.  
33  
34 72. Evrard P. Belgian Modified Classification of Maastricht for Donors After Circulatory  
35 Death on behalf of the Belgian Working Group on DCD National Protocol. In:  
36 *Transplantation Proceedings* [Internet]. Elsevier; 2014. p. 3138–42. Available from:  
37 [http://www.transplantation-proceedings.org/article/S0041-1345\(14\)01019-7/pdf](http://www.transplantation-proceedings.org/article/S0041-1345(14)01019-7/pdf)  
38  
39 73. Finlay IG, van Dijk B. Euthanasia: the Dutch experience and what it entails in practice.  
40 *Lancet Oncol*. 2002 Mar;3(3):135–6.  
41  
42 74. Fischer S, Huber CA, Imhof L, Mahrer Imhof R, Furter M, Ziegler SJ, et al. Suicide  
43 assisted by two Swiss right-to-die organisations. *J Med Ethics*. 2008 Nov;34(11):810–4.  
44  
45 75. 1. de Wachter MAM. Active Euthanasia in the Netherlands. *JAMA* [Internet]. 1989 Dec  
46 15;262(23):3316–9. Available from: <https://doi.org/10.1001/jama.1989.03430230101034>  
47  
48 76. Hiscox WE. Physician-Assisted Suicide in Oregon: The ‘Death with Dignity’ Data. *Med*  
49 *Law Int* [Internet]. 2007 Sep 1;8(3):197–220. Available from:  
50 <https://doi.org/10.1177/096853320700800301>  
51  
52  
53  
54  
55  
56  
57  
58  
59

- 1  
2  
3 77. Horikx A, Admiraal P V. [Utilization of euthanatic agents; experience of physicians with  
4 227 patients, 1998-2000]. *Ned Tijdschr Geneeskd.* 2000 Dec;144(52):2497–500.  
5  
6  
7 78. Inghelbrecht E, Bilsen J, Mortier F, Deliens L. Factors related to the involvement of  
8 nurses in medical end-of-life decisions in Belgium: a death certificate study. *Int J Nurs*  
9 *Stud.* 2008 Jul;45(7):1022–31.  
10  
11 79. Jamison S. When Drugs Fail: Assisted Deaths and Not-So-Lethal Drugs. *J Pharm Care*  
12 *Pain Symptom Control* [Internet]. 1996 Jan 1;4(1–2):223–43. Available from:  
13 [https://doi.org/10.1300/J088v04n01-2\\_05](https://doi.org/10.1300/J088v04n01-2_05)  
14  
15  
16 80. Kimsma GK. Euthanasia and Euthanizing Drugs in The Netherlands. *J Pharm Care Pain*  
17 *Symptom Control* [Internet]. 1996 Jan 1;4(1–2):193–210. Available from:  
18 [https://doi.org/10.1300/J088v04n01-2\\_03](https://doi.org/10.1300/J088v04n01-2_03)  
19  
20  
21 81. Kompanje EJO, de Beaufort ID, Bakker J. Euthanasia in intensive care: a 56-year-old man  
22 with a pontine hemorrhage resulting in a locked-in syndrome. *Crit Care Med.* 2007  
23 Oct;35(10):2428–30.  
24  
25 82. Lalmohamed A, Horikx A. [Experience with euthanasia since 2007. Analysis of problems  
26 with execution]. Vol. 154, *Nederlands tijdschrift voor geneeskunde.* 2010. A1882 p.  
27  
28  
29 83. Lau HS, Riezebos J, Abas V, Porsius AJ, De Boer A. A nation-wide study on the practice  
30 of euthanasia and physician-assisted suicide in community and hospital pharmacies in The  
31 Netherlands. *Pharm World Sci.* 2000 Feb;22(1):3–9.  
32  
33 84. Lemiengre J, Dierckx de Casterle B, Denier Y, Schotsmans P, Gastmans C. How do  
34 hospitals deal with euthanasia requests in Flanders (Belgium)? A content analysis of  
35 policy documents. *Patient Educ Couns.* 2008 May;71(2):293–301.  
36  
37  
38 85. Lossignol D. [Euthanasia: medications and medical procedures]. *Rev Med Brux.* 2008  
39 Sep;29(4):435–40.  
40  
41 86. Oregon Nurses Association. Guidelines on the nurse's role related to the death with  
42 dignity act. 2001.  
43  
44  
45 87. Pasma HRW, Wolf JEH, Hesselink BAM, van der Heide A, van der Wal G, van der  
46 Maas PJ, et al. Policy statements and practice guidelines for medical end-of-life decisions  
47 in Dutch health care institutions: developments in the past decade. *Health Policy.* 2009  
48 Sep;92(1):79–88.  
49  
50  
51 88. Pennec S, Riou F, Gaymu J, Pontone S, Aubry R. Physician-assisted deaths in France:  
52 results from a nationwide survey. *Presse Med.* 2015;44(7–8):864–7.  
53  
54  
55  
56  
57  
58  
59

- 1  
2  
3 89. Rietjens JAC, van Delden JJM, van der Heide A, Vrakking AM, Onwuteaka-Philipsen  
4 BD, van der Maas PJ, et al. Terminal sedation and euthanasia: a comparison of clinical  
5 practices. *Arch Intern Med*. 2006 Apr;166(7):749–53.  
6  
7  
8 90. Rietjens JAC, van der Maas PJ, Onwuteaka-Philipsen BD, van Delden JJM, van der Heide  
9 A. Two Decades of Research on Euthanasia from the Netherlands. What Have We Learnt  
10 and What Questions Remain? *J Bioeth Inq*. 2009 Sep;6(3):271–83.  
11  
12 91. Schildmann J, Hoetzel J, Mueller-Busch C, Vollmann J. End-of-life practices in palliative  
13 care: a cross sectional survey of physician members of the German Society for Palliative  
14 Medicine. *Palliat Med*. 2010 Dec;24(8):820–7.  
15  
16 92. Smets T, Bilsen J, Cohen J, Rurup ML, De Keyser E, Deliens L. The medical practice of  
17 euthanasia in Belgium and The Netherlands: legal notification, control and evaluation  
18 procedures. *Health Policy*. 2009 May;90(2–3):181–7.  
19  
20 93. Smets T, Bilsen J, Cohen J, Rurup ML, Deliens L. Legal euthanasia in Belgium:  
21 characteristics of all reported euthanasia cases. *Med Care*. 2010 Feb;48(2):187–92.  
22  
23 94. Smets T, Bilsen J, Cohen J, Rurup ML, Mortier F, Deliens L. Reporting of euthanasia in  
24 medical practice in Flanders, Belgium: cross sectional analysis of reported and unreported  
25 cases. *BMJ*. 2010 Oct;341:c5174.  
26  
27 95. Smets T, Bilsen J, Van den Block L, Cohen J, Van Casteren V, Deliens L. Euthanasia in  
28 patients dying at home in Belgium: interview study on adherence to legal safeguards. *Br J*  
29 *Gen Pract*. 2010 Apr;60(573):e163-70.  
30  
31 96. Sprij B. [Could it be a little less? Let the dose of thiopental in euthanasia depend on the  
32 body weight]. *Ned Tijdschr Geneesk*. 2010;154(43).  
33  
34 97. Thienpont L, Verhofstadt M, Van Loon T, Distelmans W, Audenaert K, De Deyn PP.  
35 Euthanasia requests, procedures and outcomes for 100 Belgian patients suffering from  
36 psychiatric disorders: a retrospective, descriptive study. *BMJ Open*. 2015  
37 Jul;5(7):e007454.  
38  
39 98. van Bruchem-van de Scheur GG, van der Arend AJG, Huijjer Abu-Saad H, van Wijmen  
40 FCB, Spreeuwenberg C, Ter Meulen RHJ. Euthanasia and assisted suicide in Dutch  
41 hospitals: the role of nurses. *J Clin Nurs*. 2008 Jun;17(12):1618–26.  
42  
43 99. van Bruchem-van de Scheur GAG, van der Arend AJG, Abu-Saad HH, van Wijmen FCB,  
44 Spreeuwenberg C, ter Meulen RHJ. Alleviation of pain and symptoms with a life-  
45 shortening intention. *Nurs Ethics*. 2008 Sep;15(5):682–95.  
46  
47 100. van der Heide A, Onwuteaka-Philipsen B, Rurup M, Buiting H, van Delden J, Hanssen-de  
48 Wolf J, et al. Medical decisions regarding the end of life in the Netherlands after the  
49 Euthanasia Act came into force; fourth national survey. *Dutch J Med*. 2007;151:1635–42.  
50  
51  
52  
53  
54  
55  
56  
57  
58  
59

- 1  
2  
3 101. van der Heide A, Onwuteaka-Philipsen BD, Rurup ML, Buiting HM, van Delden JJM,  
4 Hanssen-de Wolf JE, et al. End-of-life practices in the Netherlands under the Euthanasia  
5 Act. *N Engl J Med*. 2007 May;356(19):1957–65.  
6
- 7  
8 102. van Heest FB, Finlay IG, Kramer JJE, Otter R, Meyboom-de Jong B. Telephone  
9 consultations on palliative sedation therapy and euthanasia in general practice in The  
10 Netherlands in 2003: a report from inside. *Fam Pract*. 2009 Dec;26(6):481–7.  
11
- 12 103. van Marwijk H, Haverkate I, van Royen P, The A-M. Impact of euthanasia on primary  
13 care physicians in the Netherlands. *Palliat Med*. 2007 Oct;21(7):609–14.  
14
- 15 104. Wineberg H. Oregon’s Death with Dignity Act: fourteen months and counting. *Arch*  
16 *Intern Med*. 2000 Jan;160(1):21–3.  
17
- 18 105. Ziegler SJ, Bosshard G. Role of non-governmental organisations in physician assisted  
19 suicide. *BMJ*. 2007 Feb;334(7588):295–8.  
20
- 21 106. Medical Assistance in Dying: Parenteral Pharmacologic Recommendations. *Health PEI*;  
22 2016.  
23
- 24 107. KNMG/KNMP Guidelines for the practice of Euthanasia and Physician-Assisted Suicide  
25 2012. [https://www.knmg.nl/web/file?uuid=c56c038c-ffcd-486e-](https://www.knmg.nl/web/file?uuid=c56c038c-ffcd-486e-a77407f7de104f94&owner=5c945405-d6ca-4deb-aa16-7af2088aa173&contentid=223&elementid=2003770)  
26 [a77407f7de104f94&owner=5c945405-d6ca-4deb-aa16-7af2088aa173&](https://www.knmg.nl/web/file?uuid=c56c038c-ffcd-486e-a77407f7de104f94&owner=5c945405-d6ca-4deb-aa16-7af2088aa173&contentid=223&elementid=2003770)  
27 [contentid=223&elementid=2003770](https://www.knmg.nl/web/file?uuid=c56c038c-ffcd-486e-a77407f7de104f94&owner=5c945405-d6ca-4deb-aa16-7af2088aa173&contentid=223&elementid=2003770). Accessed June 2017.  
28
- 29 108. Euthanasia: a “kit” sold in Belgian pharmacies. *Prescrire Int*. 2005 Oct;14(79):197.  
30
- 31 109. Assistance in Dying Oversight Group (February 8 2016). *Assistance in Dying - P&P*  
32 *INT*. Unpublished internal document, Trillium Health Partners.  
33
- 34 110. Author unknown (2017). *UHN Information for MAID Intervention*. Unpublished internal  
35 document, University Health Network.  
36
- 37 111. Author unknown (April 2016). *Physician’s Orders, Medical Assistance in Dying*  
38 *(MAID)*. Unpublished internal document, The Ottawa Hospital/L’Hopital d’Ottawa  
39
- 40 112. Author unknown (June 2017). *Medication protocol for MAID*. Unpublished Internal  
41 document. Southlake Regional Health Centre.  
42
- 43 113. Author unknown. (June 2016) *Medication protocol for MAID*. Unpublished Internal  
44 document. Oakville Trafalgar Memorial Hospital.  
45  
46  
47  
48  
49  
50  
51  
52  
53  
54  
55  
56  
57  
58  
59  
60

- 1  
2  
3 114. Author Unknown. (June 2016). *Medical Assistance in Dying (MAID) - Physician*  
4 *Administered IV Protocol*. Unpublished Internal Document. Nova Scotia Health  
5 Authority  
6  
7  
8 115. Author Unknown. (April 2017) *Prescription for medical Assistance in Dying (MAID),*  
9 *Physician or Nurse Practitioner-Administered*. Unpublished internal document. Vitalité  
10 Health Network and Horizon Health Network.  
11  
12 116. Author unknown. (2016) *Medical assistance in dying order set*. Unpublished Internal  
13 Document, Kingston General Hospital.  
14  
15 117. Author unknown. (November 29 2016) *MAiD (Medical Aid in*  
16 *Dying) Prescription*. Unpublished internal document, Brockville General Hospital.  
17  
18 118. Author unknown. (February 8, 2018). *British Columbia Medical Assistance in*  
19 *Dying Prescription*. Unpublished internal document, British Columbia Ministry of  
20 Health.  
21  
22 119. Author unknown. (July 9, 2019). *Medical Assistance in Dying Medication*  
23 *Protocols*. Unpublished internal document, Alberta Health Services, Alberta College of  
24 Pharmacists, College of Physicians and Surgeons of Alberta College and Association of  
25 Registered Nurses of Alberta.  
26  
27 120. Author unknown. (June 2017) *Standardized Prescription for Medical Assistance in Dying*  
28 *(MAID) in Manitoba*. Unpublished internal document, The Manitoba Provincial Medical  
29 Assistance in Dying Clinical Team.  
30  
31 121. Author unknown. (November 2018). *MAID medication prescription*. Unpublished  
32 internal document. Brantford, Ontario  
33  
34 122. Author unknown. (April 2017) *Medical Prescription*. Unpublished internal  
35 document. Collège des médecins du Québec.  
36  
37 123. Author unknown. (July 2016). *Prescription protocol for practitioner-administered*  
38 *medical assistance in dying (injection)*. Unpublished internal document, Government of  
39 Saskatchewan.  
40  
41 124. Borgsteede SD, Rhodius CA, De Smet PAGM, Pasma HRW, Onwuteaka-Philipsen BD,  
42 Rurup ML. The use of opioids at the end of life: knowledge level of pharmacists and  
43 cooperation with physicians. *Eur J Clin Pharmacol*. 2011;67(1):79–89.  
44  
45 125. Bosshard G, Broeckaert B, Clark D, Materstvedt LJ, Gordijn B, Müller-Busch HC. A role  
46 for doctors in assisted dying? An analysis of legal regulations and medical professional  
47 positions in six European countries. *J Med Ethics*. 2008;34(1):28–32.  
48  
49  
50  
51  
52  
53  
54  
55  
56  
57  
58  
59  
60



- 1  
2  
3 126. Burkhardt S, Macias A, Jousset N, La Harpe R. Assisted suicide: experiences and debates  
4 in switzerland. *Med Droit*. 2015;155–60.
- 5  
6  
7 127. Campbell CS, Black MA. Dignity, death, and dilemmas: a study of Washington hospices  
8 and physician-assisted death. *J Pain Symptom Manage*. 2014 Jan;47(1):137–53.
- 9  
10 128. De Casterlé BD, Verpoort C, De Bal N, Gastmans C. Nurses' views on their involvement  
11 in euthanasia: a qualitative study in Flanders (Belgium). *J Med Ethics*. 2006;32(4):187–  
12 92.
- 13  
14 129. Dees MK, Vernooij-Dassen MJ, Dekkers WJ, Elwyn G, Vissers KC, van Weel C.  
15 Perspectives of decision-making in requests for euthanasia: a qualitative research among  
16 patients, relatives and treating physicians in the Netherlands. *Palliat Med*. 2013  
17 Jan;27(1):27–37.
- 18  
19  
20 130. Dierickx S, Deliens L, Cohen J, Chambaere K. Involvement of Palliative Care in People  
21 Receiving Euthanasia. In: Abstracts of the 9th World Research Congress of the European  
22 Association for Palliative Care (EAPC). 2016.
- 23  
24  
25 131. Fass J, Fass A. Physician-assisted suicide: ongoing challenges for pharmacists. *Am J*  
26 *Health Syst Pharm*. 2011 May;68(9):846–9.
- 27  
28 132. Francke AL, Albers G, Bilsen J, de Veer AJE, Onwuteaka-Philipsen BD. Nursing staff  
29 and euthanasia in the Netherlands. A nation-wide survey on attitudes and involvement in  
30 decision making and the performance of euthanasia. *Patient Educ Couns*. 2016;99(5):783–  
31 9.
- 32  
33  
34 133. Grube D. Oregon: Aid in Dying - Drug Protocol - Chloral Hydrate, Phenobarbital and  
35 Morphine. 2014.
- 36  
37 134. Hedberg K, Hopkins D, Leman R, Kohn M. The 10-year experience of Oregon's Death  
38 with Dignity Act: 1998-2007. *J Clin Ethics*. 2009;20(124–32).
- 39  
40  
41 135. Hesselink BAM, Onwuteaka-Philipsen BD, Janssen A, Buiting HM, Kollau M, Rietjens  
42 JAC, et al. Do guidelines on euthanasia and physician-assisted suicide in Dutch hospitals  
43 and nursing homes reflect the law? A content analysis. *J Med Ethics*. 2012;38(1):35–42.
- 44  
45  
46 136. Hicks MH-R. Physician-assisted suicide: a review of the literature concerning practical  
47 and clinical implications for UK doctors. *BMC Fam Pract*. 2006;7(1):39.
- 48  
49 137. Lemiengre J, De Casterlé BD, Denier Y, Schotsmans P, Gastmans C. Content analysis of  
50 euthanasia policies of nursing homes in Flanders (Belgium). *Med Heal Care Philos*.  
51 2009;12(3):313–22.
- 52  
53  
54 138. Ministerio de Salud. Protocolo para la aplicación del procedimiento de eutanasia en  
55 Colombia [Internet]. 2015. Available from:
- 56  
57  
58  
59  
60

- <https://www.minsalud.gov.co/sites/rid/Lists/Biblioteca-Digital/RIDE/DE/CA/Protocolo-aplicacion-procedimiento-eutanasia-colombia.pdf>. Accessed June 2017.
139. Ogden RD, Hamilton WK, Whitcher C. Assisted suicide by oxygen deprivation with helium at a Swiss right-to-die organisation. *J Med Ethics*. 2010;36(3):174–9.
140. Onwuteaka-Philipsen BD, Brinkman-Stoppelenburg A, Penning C, de Jong-Krul GJF, van Delden JJM, van der Heide A. Trends in end-of-life practices before and after the enactment of the euthanasia law in the Netherlands from 1990 to 2010: a repeated cross-sectional survey. *Lancet*. 2012;380(9845):908–15.
141. Smets T, Bilsen J, Cohen J, Rurup ML, Mortier F, Deliens L. Medical decisions at the end of life in flanders, Belgium - A nationwide post-mortem survey of euthanasia cases reported and unreported to the federal review committee. *Palliat Med*. 2010;24(4):S46.
142. Sullivan AD, Hedberg K, Fleming DW. Legalized Physician-Assisted Suicide in Oregon - The Second Year. *N Engl J Med* [Internet]. 2000 Feb 24;342(8):598–604. Available from: <https://doi.org/10.1056/NEJM200002243420822>
143. Wang LH, Elliott MA, Jung Henson L, Gerena-Maldonado E, Strom S, Downing S, et al. Death with dignity in Washington patients with amyotrophic lateral sclerosis. *Neurology*. 2016 Nov;87(20):2117–22.
144. Washington State Department of Health. Death with Dignity Act Report Executive Summary. [Internet]. 2015. Available from: <http://www.doh.wa.gov/portals/1/Documents/Pubs/422-109-DeathWithDignityAct2015.pdf> . Accessed June 2017.
145. Weiss E, Downar J, editors. Ontario Maid Provider Handbook. [Internet]. Ontario College of Family Physicians Collaborative Mentoring Networks; 2018. Available from: <https://www.ontariofamilyphysicians.ca/files/maid-handbook-0-2-2018-august-2.pdf>.
146. Ysebaert D, Detry O, Verfailli G, Mikhalski D, Van Raemdonck D. Abstracts of the 17th Congress of the European Society for Organ Transplantation 13 - 16 September 2015, Brussels, Belgium. *Transpl Int*. 2015 Nov;28 Suppl 4:1–856.
147. Emanuel EJ, Onwuteaka-Philipsen BD, Urwin JW, Cohen J. Attitudes and Practices of Euthanasia and Physician-Assisted Suicide in the United States, Canada, and Europe. *JAMA*. 2016 Jul;316(1):79–90.
148. Al Rabadi L, LeBlanc M, Bucy T, Ellis LM, Hershman DL, Meyskens Jr FL, et al. Trends in Medical Aid in Dying in Oregon and Washington. *JAMA Netw Open* [Internet]. 2019 Aug 9;2(8):e198648–e198648. Available from: <https://doi.org/10.1001/jamanetworkopen.2019.8648>

- 1  
2  
3 149. Ball IM, Hodge B, Jansen S, Nickle S, Sibbald RW. A Canadian Academic Hospital's  
4 Initial MAID Experience: A Health-Care Systems Review. *J Palliat Care*. 2019  
5 Apr;34(2):78–84.  
6  
7  
8 150. Beardsley C, Brown K, Sandroussi C. Euthanasia and surgeons: an overview of the  
9 Victorian Voluntary Assisted Dying Act 2017 and its relevance to surgical practice in  
10 Australia. *ANZ J Surg*. 2018 Oct;88(10):956–8.  
11  
12 151. Blanke CD, Leblanc M, Hershman D, Meyskens F, Taylor L, Ellis LM. Medical-aid-in-  
13 dying use in the US Pacific Northwest. *Ann Oncol* [Internet]. 2018 Oct 1;29:viii555–6.  
14 Available from: <https://doi.org/10.1093/annonc/mdy295.026>  
15  
16  
17 152. Blanke C, LeBlanc M, Hershman D, Ellis L, Meyskens F. Characterizing 18 Years of the  
18 Death With Dignity Act in Oregon. *JAMA Oncol*. 2017 Oct;3(10):1403–6.  
19  
20 153. Buchbinder M, Ojo E, Knio L, Brassfield ER. Caregivers' Experiences With Medical Aid-  
21 In-Dying in Vermont: A Qualitative Study. *J Pain Symptom Manage*. 2018  
22 Dec;56(6):936–43.  
23  
24  
25 154. Dierickx S, Cohen J, Vander Stichele R, Deliens L, Chambaere K. Drugs Used for  
26 Euthanasia: A Repeated Population-Based Mortality Follow-Back Study in Flanders,  
27 Belgium, 1998-2013. *J Pain Symptom Manage*. 2018 Oct;56(4):551–9.  
28  
29  
30 155. Dierickx S, Deliens L, Cohen J, Chambaere K. Involvement of palliative care in  
31 euthanasia practice in a context of legalized euthanasia: A population-based mortality  
32 follow-back study. *Palliat Med*. 2018 Jan;32(1):114–22.  
33  
34  
35 156. Hales BM, Bean S, Isenberg-Grzeda E, Ford B, Selby D. Improving the Medical  
36 Assistance in Dying (MAID) process: A qualitative study of family caregiver  
37 perspectives. *Palliat Support Care*. 2019 Oct;17(5):590–5.  
38  
39  
40 157. Harty C, Chaput AJ, Trouton K, Buna D, Naik VN. Oral medical assistance in dying  
41 (MAiD): informing practice to enhance utilization in Canada. *Can J Anaesth*. 2019  
42 Sep;66(9):1106–12.  
43  
44 158. Hedberg K, New C. Oregon's Death With Dignity Act: 20 Years of Experience to Inform  
45 the Debate. *Ann Intern Med*. 2017 Sep 19;167.  
46  
47  
48 159. Hughes MT. The pharmacist and medical aid in dying. *Am J Heal Pharm* [Internet]. 2017  
49 Aug 15;74(16):1253–60. Available from: <https://doi.org/10.2146/ajhp170122>  
50  
51  
52 160. Hurst SA, Zellweger U, Bosshard G, Bopp M. Medical end-of-life practices in Swiss  
53 cultural regions: a death certificate study. *BMC medicine*. 2018 Dec;16(1):54. Available  
54 from: <https://doi.org/10.1186/s12916-018-1043-5>  
55  
56  
57  
58  
59

- 1  
2  
3  
4  
5  
6 161. Li M, Watt S, Escaf M, Gardam M, Heesters A, O'Leary G, et al. Medical Assistance in  
7 Dying — Implementing a Hospital-Based Program in Canada. *N Engl J Med* [Internet].  
8 2017 May 24;376(21):2082–8. Available from: <https://doi.org/10.1056/NEJMms1700606>  
9
- 10 162. Riley SR, Overbeek A, van der Heide A. Physician adherence to clinical guidelines in  
11 euthanasia and assisted suicide in the Netherlands: a qualitative study. *Fam Pract*. 2019  
12 Nov;  
13
- 14 163. Silviu JL, Memon A, Arain M. Medical Assistance in Dying: Alberta Approach and  
15 Policy Analysis. *Can J Aging*. 2019 Sep;38(3):397–406.  
16  
17
- 18 164. Wang DH. No Easy Way Out: A Case of Physician-Assisted Dying in the Emergency  
19 Department. *Ann Emerg Med* [Internet]. 2018 Aug 1;72(2):206–10. Available from:  
20 <https://doi.org/10.1016/j.annemergmed.2017.08.056>  
21  
22  
23  
24  
25  
26  
27  
28  
29  
30  
31  
32  
33  
34  
35  
36  
37  
38  
39  
40  
41  
42  
43  
44  
45  
46  
47  
48  
49  
50  
51  
52  
53  
54  
55  
56  
57  
58  
59  
60

1  
2  
3  
4  
5  
6  
7  
8  
9  
10  
11  
12  
13  
14  
15  
16  
17  
18  
19  
20  
21  
22  
23  
24  
25  
26  
27  
28  
29  
30  
31  
32  
33  
34  
35  
36  
37  
38  
39  
40  
41  
42  
43  
44  
45  
46  
47  
48  
49  
50  
51  
52  
53  
54  
55  
56  
57  
58  
59  
60

For peer review only

## Supplemental file 4: Sources of evidences and data extracted

| <b>Author</b>                               | <b>Type of Study/Report Type</b> | <b>Year</b> | <b>Country</b> | <b>Protocol Described</b> | <b>Location of MAID Provision</b> |
|---------------------------------------------|----------------------------------|-------------|----------------|---------------------------|-----------------------------------|
| Oncology Nursing Society Board of Directors | Position Statement               | 2001        | USA            | Not specified             | Not specified                     |
| Baron et al.                                | Review                           | 1996        | USA            | Not specified             | Not specified                     |
| Boissinot et al.                            | Review                           | 2014        | France         | IV and Oral               | Hospital                          |
| Burette et al.                              | Review                           | 2008        | Belgium        | IV and Oral               | Home, hospital, hospice           |
| Chambaere et al.                            | Survey                           | 2015        | Belgium        | Not specified             | Not specified                     |
| Chin et al.                                 | Cohort study                     | 1999        | USA            | Not specified             | Not specified                     |
| De Boer et al.                              | Survey                           | 1997        | Netherlands    | IV and Oral               | Not specified                     |
| Detry et al.                                | Case Report                      | 2008        | Belgium        | Not specified             | Hospital                          |
| de Casterle et al.                          | Qualitative study                | 2010        | Belgium        | Not specified             | Hospital                          |
| Enck                                        | Review                           | 2010        | Belgium        | Not specified             | Home                              |
| Groenewoud et al.                           | Qualitative study                | 2000        | Netherlands    | IV                        | Not specified                     |
| Hopkins & Boss                              | Cross-Sectional study            | 2006        | USA            | Not specified             | Not specified                     |
| Lewis                                       | Review                           | 2009        | Belgium        | IV and Oral               | Hospital (50%), Home, (45%)       |
| Loggers et al                               | Review                           | 2013        | USA            | Oral                      | Home, hospice                     |
| Meek                                        | Review                           | 2006        | Multi-region   | Not specified             | Not specified                     |
| Meier et al.                                | Survey                           | 1998        | USA            | IV                        | Not specified                     |
| Ogden                                       | Review                           | 1994        | Canada         | Not specified             | Not specified                     |
| Pereira et al.                              | Review                           | 2008        | Switzerland    | Not specified             | Hospital or NGO Headquarters      |
| Rurup et al.                                | Cross-sectional study            | 2006        | Netherlands    | IV                        | Not specified                     |

|                                            |                       |      |                                                                   |               |                                                                                 |
|--------------------------------------------|-----------------------|------|-------------------------------------------------------------------|---------------|---------------------------------------------------------------------------------|
| Smith et al.                               | Cross-sectional study | 2011 | USA                                                               | Not specified | Home, hospice                                                                   |
| van der Arend                              | Review                | 1998 | Netherlands                                                       | Not specified | Not specified                                                                   |
| Vander Stichele et al.                     | Survey                | 2004 | Belgium                                                           | IV            | Home, Hospital                                                                  |
| Werth & Wineberg                           | Review                | 2005 | USA                                                               | Oral          | Home, Nursing home, Hospital                                                    |
| Netherlands State Commission on Euthanasia | Review                | 1987 | Netherlands                                                       | Not specified | Not specified                                                                   |
| Asch                                       | Review                | 1996 | USA                                                               | Not specified | Not specified                                                                   |
| Benrubi                                    | Review                | 1992 | Netherlands                                                       | Not specified | Not specified                                                                   |
| Bilsen et al.                              | Survey                | 2004 | Belgium                                                           | Not specified | Institution, Home                                                               |
| Bosshard et al.                            | Review                | 2002 | Multi-region (The Netherlands, Oregon, and Switzerland)           | Not specified | Not specified                                                                   |
| Bosshard et al.                            | Cohort study          | 2003 | Switzerland                                                       | IV and Oral   | Not specified                                                                   |
| Chabot & Goedhart                          | Survey                | 2009 | Netherlands                                                       | Not specified | Home                                                                            |
| De Beer et al.                             | Systematic review     | 2004 | Multi-region (The Netherlands, Australia, Belgium, Japan, Oregon) | Not specified | Not specified                                                                   |
| Emanuel et al.                             | Survey                | 1998 | USA                                                               | IV            | Not specified                                                                   |
| Ganzini et al.                             | Survey                | 2009 | USA                                                               | Not specified | Not specified                                                                   |
| Hall                                       | Review                | 1996 | USA                                                               | Not specified | Not specified                                                                   |
| Hedberg et al.                             | Cohort study          | 2003 | USA                                                               | IV            | Home (94%), Long-term care, assisted living, or foster care (5%), hospital (1%) |

|                                   |                   |      |                                        |               |                              |
|-----------------------------------|-------------------|------|----------------------------------------|---------------|------------------------------|
| Hedberg et al.                    | Cohort study      | 2002 | USA                                    | IV            | Home, Hospital               |
| Inghelbrecht et al.               | Survey            | 2010 | Belgium                                | IV            | Not specified                |
| Lossignol et al.                  | Cohort study      | 2011 | Belgium                                | IV            | Hospital                     |
| Matzo & Emanuel                   | Survey            | 1997 | USA                                    | Not specified | Not specified                |
| Meier et al.                      | Survey            | 2003 | USA                                    | Not specified | Home                         |
| Naafs                             | Review            | 2001 | Netherlands                            | Not specified | Not specified                |
| O'Brien et al.                    | Review            | 2000 | USA                                    | Not specified | Not specified                |
| Onwuteaka-Philipsen et al.        | Survey            | 1997 | Netherlands                            | IV            | Not specified                |
| Onwuteaka-Philipsen et al.        | Survey            | 1997 | Netherlands                            | Not specified | Not specified                |
| Onwuteaka-Philipsen et al.        | Survey            | 1995 | Netherlands                            | Not specified | Not specified                |
| Onwuteaka-Philipsen & van der Wal | Cohort study      | 1998 | Netherlands                            | Not specified | Home, Hospital, Nursing Home |
| Rurup et al.                      | Cohort study      | 2012 | Multi-region (Belgium and Netherlands) | Not specified | Home, Hospital               |
| Spencer                           | Review            | 1995 | USA                                    | Not specified | Not specified                |
| Swarte & Heintz                   | Review            | 1999 | Netherlands                            | IV and Oral   | Not specified                |
| Swarte & Heintz                   | Review            | 2001 | Netherlands                            | IV and Oral   | Not specified                |
| van Bruchem-van de Scheur et al.  | Survey            | 2007 | Netherlands                            | Not specified | Not specified                |
| van de Scheur & van der Arend     | Qualitative study | 1998 | Netherlands                            | Not specified | Not specified                |
| Van Der Kloot Meijburg            | Review            | 1995 | Netherlands                            | Not specified | Not specified                |
| Van Der Maas et al.               | Survey            | 1996 | Netherlands                            | Not specified | Not specified                |



|    |                         |                    |      |                                             |               |                               |
|----|-------------------------|--------------------|------|---------------------------------------------|---------------|-------------------------------|
| 1  | Van Der Wal et al       | Survey             | 1992 | Netherlands                                 | IV and Oral   | Not specified                 |
| 2  |                         |                    |      |                                             |               |                               |
| 3  |                         |                    |      |                                             |               |                               |
| 4  | Varadarajan et al.      | Review             | 2016 | Multi-region (Europe and USA)               | IV and Oral   | Not specified                 |
| 5  |                         |                    |      |                                             |               |                               |
| 6  |                         |                    |      |                                             |               |                               |
| 7  |                         |                    |      |                                             |               |                               |
| 8  | Willems et al.          | Review             | 1999 | Netherlands                                 | IV and Oral   | Not specified                 |
| 9  |                         |                    |      |                                             |               |                               |
| 10 | Bollen et al.           | Practical Manual   | 2016 | Netherlands                                 | IV            | Hospital                      |
| 11 |                         |                    |      |                                             |               |                               |
| 12 | Bilsen et al.           | Survey             | 2005 | Belgium                                     | Not specified | Not specified                 |
| 13 |                         |                    |      |                                             |               |                               |
| 14 |                         |                    |      |                                             |               |                               |
| 15 | Blanke et al.           | Cohort study       | 2017 | USA                                         | IV            | Long-term care facility       |
| 16 |                         |                    |      |                                             |               |                               |
| 17 | Boissinota et al.       | Review             | 2014 | Multi-region (European Union Member States) | IV and Oral   | Not specified                 |
| 18 |                         |                    |      |                                             |               |                               |
| 19 |                         |                    |      |                                             |               |                               |
| 20 |                         |                    |      |                                             |               |                               |
| 21 |                         |                    |      |                                             |               |                               |
| 22 |                         |                    |      |                                             |               |                               |
| 23 | Bosshard                | Review             | 2012 | Switzerland                                 | IV and Oral   | Nursing home, Hospital        |
| 24 |                         |                    |      |                                             |               |                               |
| 25 |                         |                    |      |                                             |               |                               |
| 26 | Bosshard et al.         | Survey             | 2016 | Switzerland                                 | Not specified | Not specified                 |
| 27 |                         |                    |      |                                             |               |                               |
| 28 | Campbell & Cox          | Review             | 2012 | USA                                         | Not specified | Not specified                 |
| 29 |                         |                    |      |                                             |               |                               |
| 30 |                         |                    |      |                                             |               |                               |
| 31 | Chambaere et al.        | Survey             | 2010 | Belgium                                     | IV and Oral   | Home, Hospital, Care home     |
| 32 |                         |                    |      |                                             |               |                               |
| 33 |                         |                    |      |                                             |               |                               |
| 34 | Cohen-Almagor & Hartman | Review             | 2001 | USA                                         | Not specified | Not specified                 |
| 35 |                         |                    |      |                                             |               |                               |
| 36 | Crouch                  | Review             | 1996 | USA                                         | IV            | Not specified                 |
| 37 |                         |                    |      |                                             |               |                               |
| 38 | Dunn et al.             | Guideline          | 2008 | USA                                         | Not specified | Not specified                 |
| 39 |                         |                    |      |                                             |               |                               |
| 40 | Emanuel et al.          | Survey             | 2000 | USA                                         | Not specified | Not specified                 |
| 41 |                         |                    |      |                                             |               |                               |
| 42 |                         |                    |      |                                             |               |                               |
| 43 | Emanuel                 | Survey             | 2000 | USA                                         | Not specified | Not specified                 |
| 44 |                         |                    |      |                                             |               |                               |
| 45 |                         |                    |      |                                             |               |                               |
| 46 | Engler                  | Review             | 2007 | Belgium                                     | IV and Oral   | Home, Hospital, Nursing Homes |
| 47 |                         |                    |      |                                             |               |                               |
| 48 | Evrard                  | Position statement | 2013 | Belgium                                     | Not specified | Home, Hospital                |
| 49 |                         |                    |      |                                             |               |                               |
| 50 |                         |                    |      |                                             |               |                               |
| 51 | Finlay & van Dijk       | Survey             | 2002 | Netherlands                                 | IV and Oral   | Not specified                 |
| 52 |                         |                    |      |                                             |               |                               |
| 53 |                         |                    |      |                                             |               |                               |
| 54 | Fischer et al.          | Survey             | 2007 | Switzerland                                 | Oral          | NGO facility, Hospital        |
| 55 |                         |                    |      |                                             |               |                               |
| 56 | Wachter                 | Review             | 1989 | Netherlands                                 | Not specified | Not specified                 |
| 57 |                         |                    |      |                                             |               |                               |
| 58 |                         |                    |      |                                             |               |                               |
| 59 |                         |                    |      |                                             |               |                               |
| 60 |                         |                    |      |                                             |               |                               |

|    |                                  |                       |      |                                     |               |                                                           |
|----|----------------------------------|-----------------------|------|-------------------------------------|---------------|-----------------------------------------------------------|
| 1  | Hiscox                           | Review                | 2007 | USA                                 | Not specified | Not specified                                             |
| 2  |                                  |                       |      |                                     |               |                                                           |
| 3  |                                  |                       |      |                                     |               |                                                           |
| 4  | Horikx et al.                    | Survey                | 2000 | Netherlands                         | IV and Oral   | Not specified                                             |
| 5  |                                  |                       |      |                                     |               |                                                           |
| 6  | Inghelbrecht et al.              | Cross-sectional study | 2008 | Belgium                             | Not specified | Home, Hospital, Nursing Homes                             |
| 7  |                                  |                       |      |                                     |               |                                                           |
| 8  |                                  |                       |      |                                     |               |                                                           |
| 9  |                                  |                       |      |                                     |               |                                                           |
| 10 | Jamison                          | Review                | 1996 | USA                                 | Not specified | Not specified                                             |
| 11 |                                  |                       |      |                                     |               |                                                           |
| 12 | Kimsma, 1996                     | Review                | 1996 | Netherlands                         | IV and Oral   | Not specified                                             |
| 13 |                                  |                       |      |                                     |               |                                                           |
| 14 | Kompanje et al.                  | Case Report           | 2007 | Netherlands                         | IV            | Hospital (ICU)                                            |
| 15 |                                  |                       |      |                                     |               |                                                           |
| 16 | Lalmohamed & Horikx              | Cross-sectional study | 2010 | Netherlands                         | IV and Oral   | Home, hospital, hospice, nursing home                     |
| 17 |                                  |                       |      |                                     |               |                                                           |
| 18 |                                  |                       |      |                                     |               |                                                           |
| 19 | Lau et al.                       | Survey                | 2000 | Netherlands                         | IV            | Not specified                                             |
| 20 |                                  |                       |      |                                     |               |                                                           |
| 21 | Lemiengre et al.                 | Qualitative study     | 2008 | Belgium                             | Not specified | Hospitals                                                 |
| 22 |                                  |                       |      |                                     |               |                                                           |
| 23 | Lossignol                        | Review                | 2008 | Belgium                             | IV and Oral   | Not specified                                             |
| 24 |                                  |                       |      |                                     |               |                                                           |
| 25 | Oregon Nurses Association,       | Guideline             | 2001 | USA                                 | IV            | Not specified                                             |
| 26 |                                  |                       |      |                                     |               |                                                           |
| 27 | Pasman et al.                    | Cross-sectional study | 2009 | Netherlands                         | IV            | Hospitals, nursing homes, hospices                        |
| 28 |                                  |                       |      |                                     |               |                                                           |
| 29 |                                  |                       |      |                                     |               |                                                           |
| 30 |                                  |                       |      |                                     |               |                                                           |
| 31 | Pennec et al.                    | Survey                | 2015 | France                              | IV            | Home                                                      |
| 32 |                                  |                       |      |                                     |               |                                                           |
| 33 | Rietjens et al.                  | Qualitative Study     | 2006 | Netherlands                         | IV            | Home, Hospital, Nursing Homes                             |
| 34 |                                  |                       |      |                                     |               |                                                           |
| 35 | Rietjens et al.                  | Review                | 2009 | Netherlands                         | IV            | Not specified                                             |
| 36 |                                  |                       |      |                                     |               |                                                           |
| 37 | Schildmann et al.                | Survey                | 2010 | Germany                             | Not specified | Not specified                                             |
| 38 |                                  |                       |      |                                     |               |                                                           |
| 39 | Smets et al.                     | Review                | 2009 | Multi-region (Netherlands, Belgium) | Not specified | Not specified                                             |
| 40 |                                  |                       |      |                                     |               |                                                           |
| 41 |                                  |                       |      |                                     |               |                                                           |
| 42 |                                  |                       |      |                                     |               |                                                           |
| 43 | Smets et al.                     | Cohort study          | 2010 | Belgium                             | IV and Oral   | Hospital (51.7% of cases), Home (42.2%), Care home (4.3%) |
| 44 |                                  |                       |      |                                     |               |                                                           |
| 45 |                                  |                       |      |                                     |               |                                                           |
| 46 |                                  |                       |      |                                     |               |                                                           |
| 47 | Smets et al.                     | Cross-sectional study | 2010 | Belgium                             | IV and Oral   | Home, hospital, or care home                              |
| 48 |                                  |                       |      |                                     |               |                                                           |
| 49 |                                  |                       |      |                                     |               |                                                           |
| 50 |                                  |                       |      |                                     |               |                                                           |
| 51 | Smets et al.                     | Qualitative           | 2010 | Belgium                             | IV and Oral   | Home                                                      |
| 52 |                                  |                       |      |                                     |               |                                                           |
| 53 | Sprij                            | Review                | 2010 | Netherlands                         | IV            | Not specified                                             |
| 54 |                                  |                       |      |                                     |               |                                                           |
| 55 | Thienpont et al.                 | Cohort study          | 2015 | Belgium                             | IV            | Home, Hospital                                            |
| 56 |                                  |                       |      |                                     |               |                                                           |
| 57 | van Bruchem-van de Scheur et al. | Survey                | 2008 | Netherlands                         | Not specified | Hospital                                                  |
| 58 |                                  |                       |      |                                     |               |                                                           |
| 59 |                                  |                       |      |                                     |               |                                                           |
| 60 |                                  |                       |      |                                     |               |                                                           |

|    |                  |              |      |               |               |                        |
|----|------------------|--------------|------|---------------|---------------|------------------------|
| 1  | van Bruchem-     | Survey       | 2008 | Netherlands   | Not specified | Home, Hospital,        |
| 2  | van de Scheur    |              |      |               |               | Nursing Homes          |
| 3  | et al.           |              |      |               |               |                        |
| 4  |                  |              |      |               |               |                        |
| 5  | van der Heide et | Survey       | 2007 | Netherlands   | Not specified | Not specified          |
| 6  | al.              |              |      |               |               |                        |
| 7  |                  |              |      |               |               |                        |
| 8  | van der Heide et | Cross-       | 2007 | Netherlands   | IV and Oral   | Not specified          |
| 9  | al.              | sectional    |      |               |               |                        |
| 10 |                  | study        |      |               |               |                        |
| 11 |                  |              |      |               |               |                        |
| 12 | van Heest et al. | Cross-       | 2009 | Netherlands   | IV            | Home                   |
| 13 |                  | sectional    |      |               |               |                        |
| 14 |                  | study        |      |               |               |                        |
| 15 |                  |              |      |               |               |                        |
| 16 | van Marwijk et   | Qualitative  | 2007 | Netherlands   | Not specified | Not specified          |
| 17 | al.              | study        |      |               |               |                        |
| 18 |                  |              |      |               |               |                        |
| 19 | Wineberg         | Cohort study | 2000 | USA           | Oral          | Not specified          |
| 20 |                  |              |      |               |               |                        |
| 21 | Ziegler &        | Review       | 2007 | Multi-region  | IV            | Oregan - Home,         |
| 22 | Bosshard         |              |      | (Switzerland, |               | Nursing home           |
| 23 |                  |              |      | USA)          |               | Switzerland - Home,    |
| 24 |                  |              |      |               |               | nursing home or in     |
| 25 |                  |              |      |               |               | some cases premisis of |
| 26 |                  |              |      |               |               | NGO                    |
| 27 |                  |              |      |               |               |                        |
| 28 | Health PEI       | Protocol     | 2016 | Canada        | IV            | Not specified          |
| 29 |                  |              |      |               |               |                        |
| 30 | Author           | Protocol     | 2012 | Netherlands   | IV and Oral   | Not specified          |
| 31 | Unknown          |              |      |               |               |                        |
| 32 | Author           | Review       | 2005 | Belgium       | IV            | At home in 41% of      |
| 33 | Unknown          |              |      |               |               | cases.                 |
| 34 |                  |              |      |               |               |                        |
| 35 | Author           | Protocol     | 2016 | Canada        | IV            | Hospital               |
| 36 | Unknown          |              |      |               |               |                        |
| 37 |                  |              |      |               |               |                        |
| 38 | Author           | Protocol     | 2017 | Canada        | IV            | Not specified          |
| 39 | Unknown          |              |      |               |               |                        |
| 40 |                  |              |      |               |               |                        |
| 41 | Author           | Protocol     | 2016 | Canada        | IV            | Hospital               |
| 42 | Unknown          |              |      |               |               |                        |
| 43 |                  |              |      |               |               |                        |
| 44 | Author           | Protocol     | 2017 | Canada        | IV            | Not specified          |
| 45 | Unknown          |              |      |               |               |                        |
| 46 |                  |              |      |               |               |                        |
| 47 | Author           | Protocol     | 2016 | Canada        | IV            | Not specified          |
| 48 | Unknown          |              |      |               |               |                        |
| 49 |                  |              |      |               |               |                        |
| 50 | Author           | Protocol     | 2016 | Canada        | IV            | Not specified          |
| 51 | Unknown          |              |      |               |               |                        |
| 52 |                  |              |      |               |               |                        |
| 53 | Author           | Protocol     | 2017 | Canada        | IV and Oral   | Not specified          |
| 54 | Unknown          |              |      |               |               |                        |
| 55 |                  |              |      |               |               |                        |
| 56 | Author           | Protocol     | 2016 | Canada        | IV            | Not specified          |
| 57 | Unknown          |              |      |               |               |                        |

|                    |                       |      |                                                                       |               |                                                                                     |
|--------------------|-----------------------|------|-----------------------------------------------------------------------|---------------|-------------------------------------------------------------------------------------|
| Author Unknown     | Protocol              | 2016 | Canada                                                                | IV            | Not specified                                                                       |
| Author Unknown     | Protocol              | 2018 | Canada                                                                | IV and Oral   | Not specified                                                                       |
| Author Unknown     | Protocol              | 2018 | Canada                                                                | IV and Oral   | Not specified                                                                       |
| Author Unknown     | Protocol              | 2017 | Canada                                                                | IV            | Location is to be determined through discussion with patient and family/caregivers. |
| Author Unknown     | Protocol              | 2018 | Canada                                                                | IV            | Not specified                                                                       |
| Author Unknown     | Protocol              | 2017 | Canada                                                                | IV            | Not specified                                                                       |
| Author Unknown     | Protocol              | 2016 | Canada                                                                | IV            | Not specified                                                                       |
| Borgsteede et al.  | Survey                | 2011 | Netherlands                                                           | Not specified | Not specified                                                                       |
| Bosshard et al.    | Review                | 2008 | Multi-region (Belgium, Netherlands, Switzerland, Germany, Norway, UK) | Not specified | Not specified                                                                       |
| Burkhardt et al.   | Review                | 2014 | Switzerland                                                           | Oral          | Home, medico-social institution                                                     |
| Campbell & Black   | Cross-sectional study | 2014 | USA                                                                   | Not specified | Hospice                                                                             |
| de Casterle et al. | Qualitative study     | 2006 | Belgium                                                               |               | Not specified                                                                       |
| Dees et al.        | Qualitative study     | 2013 | Netherlands                                                           | Not specified | Not specified                                                                       |
| Dierickx et al.    | Cross-sectional study | 2016 | Belgium                                                               | Not specified | Home, hospital                                                                      |
| Francke et al.     | Survey                | 2015 | Netherlands                                                           | Not specified | Not specified                                                                       |
| Fass & Fass        | Review                | 2011 | USA                                                                   | Oral          | Home                                                                                |
| Grube              | Protocol              | 2014 | USA                                                                   | Oral          | Not specified                                                                       |

|                                       |                              |      |                                    |               |                                                                               |
|---------------------------------------|------------------------------|------|------------------------------------|---------------|-------------------------------------------------------------------------------|
| Hedberg et al.                        | Cohort study                 | 2009 | USA                                | Oral          | Home                                                                          |
| Hesselink et al.                      | Review                       | 2012 | Netherlands                        | Not specified | Hospitals, Nursing Homes                                                      |
| Hicks                                 | Review                       | 2006 | Multi-region                       | Not specified | Not specified                                                                 |
| Lemiengre                             | Qualitative study            | 2008 | Belgium                            | Not specified | Nursing home                                                                  |
| Author Unknown                        | Protocol                     | 2015 | Columbia                           | IV            | Not specified                                                                 |
| Ogden                                 | Case Report                  | 2010 | Switzerland                        | Oral          | At the headquarters of Dignitas, a right-to-die organisation                  |
| Onwuteaka-Phillipsen et al.           | Cross-sectional study        | 2012 | Netherlands                        | Not specified | Mostly undertaken in general practice rather than hospitals or nursing homes. |
| Smets et al.                          | Cross-sectional study        | 2010 | Belgium                            | Not specified | Not specified                                                                 |
| Sullivan et al.                       | Cohort study                 | 2000 | USA                                | IV            | Not specified                                                                 |
| Wang et al.                           | Cohort study                 | 2015 | USA                                | Oral          | Home                                                                          |
| Washington State Department of Health | Protocol                     | 2015 | USA                                | Oral          | For 2015: home 86%; Long Term Care 10%; other 1% unknown 3%.                  |
| Weiss et al.                          | Clinical practice handbook   | 2018 | Canada                             | IV            | Not specified                                                                 |
| Ysebaert et al.                       | Cohort study                 | 2015 | Belgium                            | Not specified | Hospital                                                                      |
| Emanuel et al.                        | Systematic Review            | 2016 | Multi-region (USA, Canada, Europe) | Not specified | Not specified                                                                 |
| Rabadi et al.                         | Cohort study (retrospective) | 2019 | USA                                | Not specified | Home, Hospice                                                                 |
| Ball et al.                           | Descriptive Study            | 2019 | Canada                             | IV            | Home, Hospital, Nursing Home                                                  |
| Beardsley et al.                      | Descriptive Study            | 2018 | Australia                          | Oral          | Not specified                                                                 |

|    |                   |                                     |      |              |               |                                                           |
|----|-------------------|-------------------------------------|------|--------------|---------------|-----------------------------------------------------------|
| 1  | Blanke et al.     | Cohort study<br>(retrospective<br>) | 2018 | USA          | Not specified | Not specified                                             |
| 2  |                   |                                     |      |              |               |                                                           |
| 3  |                   |                                     |      |              |               |                                                           |
| 4  |                   |                                     |      |              |               |                                                           |
| 5  | Buchbinder et al. | Qualitative<br>study                | 2018 | USA          | Not specified | Home                                                      |
| 6  |                   |                                     |      |              |               |                                                           |
| 7  |                   |                                     |      |              |               |                                                           |
| 8  | Dierickx et al.   | Cohort study<br>(retrospective<br>) | 2018 | Belgium      | IV            | Home, hospital, care<br>home                              |
| 9  |                   |                                     |      |              |               |                                                           |
| 10 |                   |                                     |      |              |               |                                                           |
| 11 | Dierickx et al.   | Cohort study<br>(retrospective<br>) | 2018 | Belgium      | Not specified | Home, Nursing home,<br>hospital                           |
| 12 |                   |                                     |      |              |               |                                                           |
| 13 |                   |                                     |      |              |               |                                                           |
| 14 |                   |                                     |      |              |               |                                                           |
| 15 |                   |                                     |      |              |               |                                                           |
| 16 | Hales et al.      | Mixed<br>methods<br>study           | 2019 | Canada       | Not specified | Not specified                                             |
| 17 |                   |                                     |      |              |               |                                                           |
| 18 |                   |                                     |      |              |               |                                                           |
| 19 |                   |                                     |      |              |               |                                                           |
| 20 | Harty et al.      | Review                              | 2019 | Multi-region | Oral          | Not specified                                             |
| 21 |                   |                                     |      |              |               |                                                           |
| 22 | Hedberg & New     | Cohort study<br>(retrospective<br>) | 2017 | USA          | Not specified | Not specified                                             |
| 23 |                   |                                     |      |              |               |                                                           |
| 24 |                   |                                     |      |              |               |                                                           |
| 25 | Hughes            | Commentary                          | 2017 | USA          | Oral          | Not specified                                             |
| 26 |                   |                                     |      |              |               |                                                           |
| 27 | Hurst et al.      | Cohort study<br>(retrospective<br>) | 2018 | Switzerland  | Not specified | Home, Hospital                                            |
| 28 |                   |                                     |      |              |               |                                                           |
| 29 |                   |                                     |      |              |               |                                                           |
| 30 |                   |                                     |      |              |               |                                                           |
| 31 | Li et al.         | Report                              | 2017 | Canada       | Not specified | Hospital                                                  |
| 32 |                   |                                     |      |              |               |                                                           |
| 33 |                   |                                     |      |              |               |                                                           |
| 34 | Riley et al.      | Qualitative<br>study                | 2019 | Netherlands  | IV and Oral   | Home, Hospital,<br>Nursing Home                           |
| 35 |                   |                                     |      |              |               |                                                           |
| 36 | Silvius et al.    | Policy<br>Analysis                  | 2019 | Canada       | Not specified | Hospital, home,<br>nursing home, long<br>term care centre |
| 37 |                   |                                     |      |              |               |                                                           |
| 38 |                   |                                     |      |              |               |                                                           |
| 39 |                   |                                     |      |              |               |                                                           |
| 40 | Wang              | Case Report                         | 2018 | USA          | Not specified | Home                                                      |
| 41 |                   |                                     |      |              |               |                                                           |
| 42 |                   |                                     |      |              |               |                                                           |
| 43 |                   |                                     |      |              |               |                                                           |
| 44 |                   |                                     |      |              |               |                                                           |
| 45 |                   |                                     |      |              |               |                                                           |
| 46 |                   |                                     |      |              |               |                                                           |
| 47 |                   |                                     |      |              |               |                                                           |
| 48 |                   |                                     |      |              |               |                                                           |
| 49 |                   |                                     |      |              |               |                                                           |
| 50 |                   |                                     |      |              |               |                                                           |
| 51 |                   |                                     |      |              |               |                                                           |
| 52 |                   |                                     |      |              |               |                                                           |
| 53 |                   |                                     |      |              |               |                                                           |
| 54 |                   |                                     |      |              |               |                                                           |
| 55 |                   |                                     |      |              |               |                                                           |
| 56 |                   |                                     |      |              |               |                                                           |
| 57 |                   |                                     |      |              |               |                                                           |
| 58 |                   |                                     |      |              |               |                                                           |
| 59 |                   |                                     |      |              |               |                                                           |
| 60 |                   |                                     |      |              |               |                                                           |

## Preferred Reporting Items for Systematic reviews and Meta-Analyses extension for Scoping Reviews (PRISMA-ScR) Checklist

| SECTION                                               | ITEM | PRISMA-ScR CHECKLIST ITEM                                                                                                                                                                                                                                                                                  | REPORTED ON PAGE # |
|-------------------------------------------------------|------|------------------------------------------------------------------------------------------------------------------------------------------------------------------------------------------------------------------------------------------------------------------------------------------------------------|--------------------|
| <b>TITLE</b>                                          |      |                                                                                                                                                                                                                                                                                                            |                    |
| Title                                                 | 1    | Identify the report as a scoping review.                                                                                                                                                                                                                                                                   | 1                  |
| <b>ABSTRACT</b>                                       |      |                                                                                                                                                                                                                                                                                                            |                    |
| Structured summary                                    | 2    | Provide a structured summary that includes (as applicable): background, objectives, eligibility criteria, sources of evidence, charting methods, results, and conclusions that relate to the review questions and objectives.                                                                              | 3                  |
| <b>INTRODUCTION</b>                                   |      |                                                                                                                                                                                                                                                                                                            |                    |
| Rationale                                             | 3    | Describe the rationale for the review in the context of what is already known. Explain why the review questions/objectives lend themselves to a scoping review approach.                                                                                                                                   | 3                  |
| Objectives                                            | 4    | Provide an explicit statement of the questions and objectives being addressed with reference to their key elements (e.g., population or participants, concepts, and context) or other relevant key elements used to conceptualize the review questions and/or objectives.                                  | 4                  |
| <b>METHODS</b>                                        |      |                                                                                                                                                                                                                                                                                                            |                    |
| Protocol and registration                             | 5    | Indicate whether a review protocol exists; state if and where it can be accessed (e.g., a Web address); and if available, provide registration information, including the registration number.                                                                                                             | 4                  |
| Eligibility criteria                                  | 6    | Specify characteristics of the sources of evidence used as eligibility criteria (e.g., years considered, language, and publication status), and provide a rationale.                                                                                                                                       | 5                  |
| Information sources*                                  | 7    | Describe all information sources in the search (e.g., databases with dates of coverage and contact with authors to identify additional sources), as well as the date the most recent search was executed.                                                                                                  | 5                  |
| Search                                                | 8    | Present the full electronic search strategy for at least 1 database, including any limits used, such that it could be repeated.                                                                                                                                                                            | 5                  |
| Selection of sources of evidence†                     | 9    | State the process for selecting sources of evidence (i.e., screening and eligibility) included in the scoping review.                                                                                                                                                                                      | 5-6                |
| Data charting process‡                                | 10   | Describe the methods of charting data from the included sources of evidence (e.g., calibrated forms or forms that have been tested by the team before their use, and whether data charting was done independently or in duplicate) and any processes for obtaining and confirming data from investigators. | 6                  |
| Data items                                            | 11   | List and define all variables for which data were sought and any assumptions and simplifications made.                                                                                                                                                                                                     | 6                  |
| Critical appraisal of individual sources of evidence§ | 12   | If done, provide a rationale for conducting a critical appraisal of included sources of evidence; describe the methods used and how this information was used in any data synthesis (if appropriate).                                                                                                      | NA                 |



| SECTION                                       | ITEM | PRISMA-ScR CHECKLIST ITEM                                                                                                                                                                       | REPORTED ON PAGE # |
|-----------------------------------------------|------|-------------------------------------------------------------------------------------------------------------------------------------------------------------------------------------------------|--------------------|
| Synthesis of results                          | 13   | Describe the methods of handling and summarizing the data that were charted.                                                                                                                    | 6                  |
| <b>RESULTS</b>                                |      |                                                                                                                                                                                                 |                    |
| Selection of sources of evidence              | 14   | Give numbers of sources of evidence screened, assessed for eligibility, and included in the review, with reasons for exclusions at each stage, ideally using a flow diagram.                    | 7                  |
| Characteristics of sources of evidence        | 15   | For each source of evidence, present characteristics for which data were charted and provide the citations.                                                                                     | 7                  |
| Critical appraisal within sources of evidence | 16   | If done, present data on critical appraisal of included sources of evidence (see item 12).                                                                                                      | NA                 |
| Results of individual sources of evidence     | 17   | For each included source of evidence, present the relevant data that were charted that relate to the review questions and objectives.                                                           | Supplemental file  |
| Synthesis of results                          | 18   | Summarize and/or present the charting results as they relate to the review questions and objectives.                                                                                            | 7                  |
| <b>DISCUSSION</b>                             |      |                                                                                                                                                                                                 |                    |
| Summary of evidence                           | 19   | Summarize the main results (including an overview of concepts, themes, and types of evidence available), link to the review questions and objectives, and consider the relevance to key groups. | 9-10               |
| Limitations                                   | 20   | Discuss the limitations of the scoping review process.                                                                                                                                          | 11                 |
| Conclusions                                   | 21   | Provide a general interpretation of the results with respect to the review questions and objectives, as well as potential implications and/or next steps.                                       | 12                 |
| <b>FUNDING</b>                                |      |                                                                                                                                                                                                 |                    |
| Funding                                       | 22   | Describe sources of funding for the included sources of evidence, as well as sources of funding for the scoping review. Describe the role of the funders of the scoping review.                 | 12                 |

JBI = Joanna Briggs Institute; PRISMA-ScR = Preferred Reporting Items for Systematic reviews and Meta-Analyses extension for Scoping Reviews.

\* Where *sources of evidence* (see second footnote) are compiled from, such as bibliographic databases, social media platforms, and Web sites.

† A more inclusive/heterogeneous term used to account for the different types of evidence or data sources (e.g., quantitative and/or qualitative research, expert opinion, and policy documents) that may be eligible in a scoping review as opposed to only studies. This is not to be confused with *information sources* (see first footnote).

‡ The frameworks by Arksey and O'Malley (6) and Levac and colleagues (7) and the JBI guidance (4, 5) refer to the process of data extraction in a scoping review as data charting.

§ The process of systematically examining research evidence to assess its validity, results, and relevance before using it to inform a decision. This term is used for items 12 and 19 instead of "risk of bias" (which is more applicable to systematic reviews of interventions) to include and acknowledge the various sources of evidence that may be used in a scoping review (e.g., quantitative and/or qualitative research, expert opinion, and policy document).

From: Tricco AC, Lillie E, Zarin W, O'Brien KK, Colquhoun H, Levac D, et al. PRISMA Extension for Scoping Reviews (PRISMA-ScR): Checklist and Explanation. *Ann Intern Med.* 2018;169:467–473. doi: [10.7326/M18-0850](https://doi.org/10.7326/M18-0850).



St. Michael's

Inspired Care.  
Inspiring Science.

For peer review only - <http://bmjopen.bmj.com/site/about/guidelines.xhtml>
