# Supplementary material for: Provision of medical assistance in dying: a scoping review
Source: PubMed Central journal article supplement — BMJ Open. 2020 Jul 8;10(7):e036054. doi: 10.1136/bmjopen-2019-036054 (PMC7348461; doi:10.1136/bmjopen-2019-036054), 2020-07-08
Supplement: bmjopen-2019-036054supp001.pdf [file bmjopen-2019-036054supp001.pdf]

**Supplementary File 1: MAID Scoping Review Search Strategies**

*OVID Medline Epub Ahead of Print, In-Process & Other Non-Indexed Citations, OVID MEDLINE(R) Daily and OVID MEDLINE(R) 1946 to Present - June 16, 2017*

|                                                                                                                                |        |
|--------------------------------------------------------------------------------------------------------------------------------|--------|
| 1. right to die.ti,ab,kf. or Right to Die/                                                                                     | 5226   |
| 2. ((medical* aid* or medical* assist*) adj2 (dying or die or death*)).ti,ab,kf.                                               | 50     |
| 3. ((physician* assist* or physician aid* or doctor* assist* or doctor aid*) adj2 (death* or dying or die)).ti,ab,kf.          | 442    |
| 4. end of life choice*.ti,ab,kf.                                                                                               | 64     |
| 5. Euthanasia, Active, Voluntary/ or Euthanasia, Active/                                                                       | 3366   |
| 6. euthanasia.ti,ab,kf.                                                                                                        | 21294  |
| 7. Suicide, Assisted/                                                                                                          | 5337   |
| 8. assisted suicide*.ti,ab,kf.                                                                                                 | 2884   |
| 9. assisted death*.ti,ab,kf.                                                                                                   | 405    |
| 10. practice patterns, physicians/ or patient care guideline/ or guideline/ or (guideline* or guidance or consensus).ti,ab,kf. | 516025 |
| 11. pharmacist/ or physician/ or nurse/                                                                                        | 124347 |
| 12. patient care management/                                                                                                   | 2992   |
| 13. medication therapy management/                                                                                             | 1299   |
| 14. (medication utilization or medication therap* or "medication use" or medication*).ti,ab,kf.                                | 262031 |
| 15. drug delivery systems/                                                                                                     | 49065  |
| 16. drug administration routes/                                                                                                | 5309   |
| 17. administration, oral/                                                                                                      | 131323 |
| 18. administration, intravenous/                                                                                               | 5358   |
| 19. injections/                                                                                                                | 40348  |
| 20. (drug delivery or drug administration or bolus or inject*).ti,ab,kw.                                                       | 788480 |
| 21. Analgesics, Opioid/                                                                                                        | 35560  |
| 22. opi*.ti,ab,kf.                                                                                                             | 186417 |
| 23. Neuromuscular Blocking Agents/                                                                                             | 3299   |
| 24. (paraly* or neuromuscular block*).ti,ab,kf.                                                                                | 66603  |

|                                                                                                                                      |         |
|--------------------------------------------------------------------------------------------------------------------------------------|---------|
| 25. "Hypnotics and Sedatives"/                                                                                                       | 27048   |
| 26. (hypno* or sedat* or an?ssthe*).ti,ab,kf.                                                                                        | 506435  |
| 27. Drug Prescriptions/                                                                                                              | 25165   |
| 28. (prescribe* or prescription*).ti,ab,kf.                                                                                          | 156126  |
| 29. drug utilization/ or "drug utilization review"/                                                                                  | 22289   |
| 30. (drug utili?ation or drug therap* or "drug use").ti,ab,kf.                                                                       | 89717   |
| 31. drug therapy/                                                                                                                    | 29902   |
| 32. 1 or 2 or 3 or 4 or 5 or 6 or 7 or 8 or 9                                                                                        | 26210   |
| 33. 10 or 11 or 12 or 13 or 14 or 15 or 16 or 17 or 18 or 19 or 20 or 21 or 22 or 23 or 24 or 25 or 26 or 27 or 28 or 29 or 30 or 31 | 2433657 |
| 34. 32 and 33                                                                                                                        | 6324    |
| 35. 34 not animals/                                                                                                                  | 5325    |

**EMBASE - 1974 to 2017 June 14**

|                                                                                                                                             |        |
|---------------------------------------------------------------------------------------------------------------------------------------------|--------|
| 1. euthanasia/ or active euthanasia/ or voluntary euthanasia/                                                                               | 14939  |
| 2. assisted suicide/                                                                                                                        | 4550   |
| 3. ((medical* aid* or medical* assist*) adj2 (dying or die or death*).ti,ab,kf.                                                             | 57     |
| 4. ((physician* assist* or physician aid* or doctor* assist* or doctor aid*) adj2 (death* or dying or die)).ti,ab,kf.                       | 435    |
| 5. right to die/ or right to die.ti,ab,kw.                                                                                                  | 4339   |
| 6. end of life choice*.ti,ab,kw.                                                                                                            | 73     |
| 7. euthanasia.ti,ab,kw.                                                                                                                     | 11853  |
| 8. (assisted suicide* or assisted death*).ti,ab,kw.                                                                                         | 3348   |
| 9. clinical practice/ or medical practice/ or professional practice/ or practice guideline/                                                 | 616940 |
| 10. (clinical practice or medical practice or professional practice or practice guideline or guideline* or guidance or consensus).ti,ab,kw. | 835272 |
| 11. patient care/ or management/                                                                                                            | 292402 |
| 12. (patient care or patient management).ti,ab,kw.                                                                                          | 91135  |
| 13. prescription/ or pharmacist/ or medication therapy management/ or drug therapy/                                                         | 646407 |

|                                                                                                                                                      |         |
|------------------------------------------------------------------------------------------------------------------------------------------------------|---------|
| 14. (prescri* or pharmac* or medic* therap* or drug therapy).ti,ab,kw.                                                                               | 1238500 |
| 15. drug delivery system/ or drug administration/ or oral drug administration/ or intravenous drug administration/ or bolus injection/ or injection/ | 946330  |
| 16. (drug delivery or drug administration or bolus or inject*).ti,ab,kw.                                                                             | 998587  |
| 17. neuromuscular blocking agent/                                                                                                                    | 7115    |
| 18. (paraly* or neuromuscular block*).ti,ab,kf.                                                                                                      | 71322   |
| 19. opiate/                                                                                                                                          | 65315   |
| 20. opioi*.ti,ab,kf.                                                                                                                                 | 92154   |
| 21. hypnotic agent/                                                                                                                                  | 10032   |
| 22. (hypno* or sedat* or an?sthe*).ti,ab,kf.                                                                                                         | 384836  |
| 23. 1 or 2 or 3 or 4 or 5 or 6 or 7 or 8                                                                                                             | 24284   |
| 24. 9 or 10 or 11 or 12 or 13 or 14 or 15 or 16 or 17 or 18 or 19 or 20 or 21 or 22                                                                  | 4722340 |
| 25. 23 and 24                                                                                                                                        | 5844    |
| 26. 25 not animals/                                                                                                                                  | 5550    |

**+ 365 updated to February 18, 2020**

*PsychINFO - 1806 to June Week 2 2017*

|                                                                                                                       |        |
|-----------------------------------------------------------------------------------------------------------------------|--------|
| 1. *assisted suicide/ or euthanasia/                                                                                  | 1975   |
| 2. (assisted suicide or assisted death).mp.                                                                           | 1468   |
| 3. *euthanasia/                                                                                                       | 1265   |
| 4. euthanasia.mp.                                                                                                     | 2176   |
| 5. ((medical* aid* or medical* assist*) adj2 (dying or die or death*)).ti,ab,kf.                                      | 16     |
| 6. ((physician* assist* or physician aid* or doctor* assist* or doctor aid*) adj2 (death* or dying or die)).ti,ab,kf. | 176    |
| 7. end of life choice*.mp.                                                                                            | 32     |
| 8. right to die.mp.                                                                                                   | 240    |
| 9. exp Clinical Practice/ or exp Health Care Services/ or exp Caring Behaviours/ or exp Treatment Guideline/          | 120988 |

|                                                                                                                                                                                                                                                |         |
|------------------------------------------------------------------------------------------------------------------------------------------------------------------------------------------------------------------------------------------------|---------|
| 10. (clinical practice* or health care or medical care or treatment* or clinical practice* or medical practice* guideline* or guidance or consensus).mp.                                                                                       | 812357  |
| 11. drugs/ or drug dosages/ or "prescribing (drugs)"/ or self-medication/ or injections/ or drug administration methods/ or intravenous injections/ or drug self administration/ or Drug Therapy/                                              | 163484  |
| 12. (drug delivery or drug administration or bolus or injection or medication utilisation or medical utilization or medication therapy or medication or prescribe or prescription or drug utilisation or drug utilization or drug therapy).mp. | 203881  |
| 13. exp Clinicians/ or exp Nurse/ or exp Physicians/ or exp Pharmacists/                                                                                                                                                                       | 49394   |
| 14. exp HYPNOTIC DRUGS/                                                                                                                                                                                                                        | 5599    |
| 15. (hypno* or sedat*).mp.                                                                                                                                                                                                                     | 30936   |
| 16. exp ANALGESIC DRUGS/                                                                                                                                                                                                                       | 17811   |
| 17. opi*.mp.                                                                                                                                                                                                                                   | 77671   |
| 18. exp ANESTHETIC DRUGS/                                                                                                                                                                                                                      | 19333   |
| 19. an?sthe*.mp.                                                                                                                                                                                                                               | 13116   |
| 20. exp Muscle Relaxing Drugs/ or exp Cholinergic Receptors/ or exp Synapses/ or exp Neurotransmission/ or exp Paralysis/                                                                                                                      | 36296   |
| 21. (paraly* or neuromuscular block*).mp.                                                                                                                                                                                                      | 6790    |
| 22. 1 or 2 or 3 or 4 or 5 or 6 or 7 or 8                                                                                                                                                                                                       | 3043    |
| 23. 9 or 10 or 11 or 12 or 14 or 15 or 16 or 17 or 18 or 19 or 20 or 21                                                                                                                                                                        | 1038761 |
| 24. 22 and 23                                                                                                                                                                                                                                  | 1603    |
| 25. 24 not animals/                                                                                                                                                                                                                            | 1600    |

### Central- May 2017

|                                                                                                                 |   |
|-----------------------------------------------------------------------------------------------------------------|---|
| 1. right to die.mp. or Right to Die/                                                                            | 4 |
| 2. ((medical* aid* or medical* assist*) adj2 (dying or die or death*)).mp.                                      | 0 |
| 3. ((physician* assist* or physician aid* or doctor* assist* or doctor aid*) adj2 (death* or dying or die)).mp. | 1 |
| 4. end of life choice*.mp.                                                                                      | 1 |
| 5. Euthanasia, Active, Voluntary/ or Euthanasia, Active/                                                        | 3 |

|                                                                                                                                |        |
|--------------------------------------------------------------------------------------------------------------------------------|--------|
| 6. euthanasia.ti,ab,kf.                                                                                                        | 44     |
| 7. Suicide, Assisted/                                                                                                          | 0      |
| 8. assisted suicide*.ti,ab,kf.                                                                                                 | 3      |
| 9. assisted death*.ti,ab,kf.                                                                                                   | 0      |
| 10. practice patterns, physicians/ or patient care guideline/ or guideline/ or (guideline* or guidance or consensus).ti,ab,kf. | 23569  |
| 11. pharmacist/ or physician/ or nurse/                                                                                        | 3      |
| 12. patient care management/                                                                                                   | 104    |
| 13. medication therapy management/                                                                                             | 58     |
| 14. (medication utilization or medication therap* or "medication use" or medication*).ti,ab,kf.                                | 46253  |
| 15. drug delivery systems/                                                                                                     | 834    |
| 16. drug administration routes/                                                                                                | 312    |
| 17. administration, oral/                                                                                                      | 20558  |
| 18. administration, intravenous/                                                                                               | 490    |
| 19. injections/                                                                                                                | 2311   |
| 20. (drug delivery or drug administration or bolus or inject*).ti,ab,kw.                                                       | 140195 |
| 21. Analgesics, Opioid/                                                                                                        | 5705   |
| 22. opi*.ti,ab,kf.                                                                                                             | 18444  |
| 23. Neuromuscular Blocking Agents/                                                                                             | 250    |
| 24. (paraly* or neuromuscular block*).ti,ab,kf.                                                                                | 4273   |
| 25. "Hypnotics and Sedatives"/                                                                                                 | 3052   |
| 26. (hypno* or sedat* or an?sthe*).ti,ab,kf.                                                                                   | 54931  |
| 27. Drug Prescriptions/                                                                                                        | 419    |
| 28. (prescribe* or prescription*).ti,ab,kf.                                                                                    | 15186  |
| 29. drug utilization/ or "drug utilization review"/                                                                            | 443    |
| 30. (drug utilization or drug therap* or "drug use").ti,ab,kf.                                                                 | 283688 |
| 31. drug therapy/                                                                                                              | 300    |
| 32. 1 or 2 or 3 or 4 or 5 or 6 or 7 or 8 or 9                                                                                  | 49     |

|                                                                                                                                      |        |
|--------------------------------------------------------------------------------------------------------------------------------------|--------|
| 33. 10 or 11 or 12 or 13 or 14 or 15 or 16 or 17 or 18 or 19 or 20 or 21 or 22 or 23 or 24 or 25 or 26 or 27 or 28 or 29 or 30 or 31 | 389871 |
| 34. 32 and 33                                                                                                                        | 23     |
| 35. 34 not animals/                                                                                                                  | 20     |

*CINAHL - 1981 to June 16, 2017*

|                                                                                                                                                                                                                                      |        |
|--------------------------------------------------------------------------------------------------------------------------------------------------------------------------------------------------------------------------------------|--------|
| S1. (MH "Right to Die") OR "right to die"                                                                                                                                                                                            | 1405   |
| S2. (("medical* aid*" or "medical* assist*") N2 ("dying" or "die" or "death*"))                                                                                                                                                      | 52     |
| S3. "end of life choice*"                                                                                                                                                                                                            | 49     |
| S4. (MH "Euthanasia+") OR "euthanasia"                                                                                                                                                                                               | 5844   |
| S5. (MH "Suicide, Assisted") OR "assisted suicide"                                                                                                                                                                                   | 2785   |
| S6. "assisted death*" or "assisted dying"                                                                                                                                                                                            | 543    |
| S7. (("physician* assist*" or "physician aid*" or "doctor* assist*" or "doctor aid*") N2 ("death*" or "dying" or "die"))                                                                                                             | 243    |
| S8.(MH "Practice Patterns") OR (MH "Prescribing Patterns") OR (MH "Medical Practice")                                                                                                                                                | 12815  |
| S9. (MH "Patient Care Plans") OR "patient care management"                                                                                                                                                                           | 3773   |
| S10. (MH "Medication Management") OR "medication therapy"                                                                                                                                                                            | 350    |
| S11. (MH "Drugs, Prescription") OR (MH "Prescriptions, Drug") OR "drug prescription"                                                                                                                                                 | 16355  |
| S12. (MH "Drug Utilization") OR "drug utilization"                                                                                                                                                                                   | 4434   |
| S13. "prescribe*" or "prescription*"                                                                                                                                                                                                 | 46349  |
| S14. (MH "Drug Therapy+") OR "drug therapy" OR (MH "Drug Therapy, Combination+")                                                                                                                                                     | 312444 |
| S15. (MH "Drug Administration Routes") OR "drug administration routes" OR (MH "Administration, Intravenous") OR (MH "Self Administration") OR (MH "Administration, Oral")                                                            | 14588  |
| S16. (MH "Analgesics, Opioid+") OR (MH "Narcotics+") OR "opi*"                                                                                                                                                                       | 51110  |
| S17. (MH "Neuromuscular Nondepolarizing Agents+") OR (MH "Neuromuscular Blocking Agents+") OR (MH "Neuromuscular Depolarizing Agents+") OR (MH "Neuromuscular Agents+") OR (MH "Neuromuscular Blockade") OR "neuromuscular blockers" | 4704   |

|                                                                                                                                                                               |        |
|-------------------------------------------------------------------------------------------------------------------------------------------------------------------------------|--------|
| S18. (MH "Hypnotics and Sedatives+") OR "hypnotic*" OR "sedat*" OR (MH "Sedatives, Barbiturate+") OR (MH "Sedatives, Nonbarbiturate+") OR (MH "Sedation") OR (MH "Midazolam") | 15810  |
| S19. S1 OR S2 OR S3 OR S4 OR S5 OR S6 OR S7                                                                                                                                   | 8368   |
| S20. S8 OR S9 OR S10 OR S11 OR S12 OR S13 OR S14 OR S15 OR S16 OR S17 OR S18                                                                                                  | 404373 |
| S21. S19 AND S20                                                                                                                                                              | 1234   |
