# Supplementary material for: Provision of medical assistance in dying: a scoping review
Source: PubMed Central journal article supplement — BMJ Open. 2020 Jul 8;10(7):e036054. doi: 10.1136/bmjopen-2019-036054 (PMC7348461; doi:10.1136/bmjopen-2019-036054), 2020-07-08
Supplement: bmjopen-2019-036054supp002.pdf [file bmjopen-2019-036054supp002.pdf]

## Supplementary File 2: MAID scoping review data items

| <b>Report characteristics</b>        | <b>Description</b>                                                                                                                                                                                                                                                                 |
|--------------------------------------|------------------------------------------------------------------------------------------------------------------------------------------------------------------------------------------------------------------------------------------------------------------------------------|
| Type of study                        | Technical report, practice survey, clinical practice guideline, observational study, clinical trial, other (describe)                                                                                                                                                              |
| Journal / Publication location       |                                                                                                                                                                                                                                                                                    |
| Author, year                         | Profession and/or specialization                                                                                                                                                                                                                                                   |
| Origin of report                     | Jurisdiction of report (eg. country, state)                                                                                                                                                                                                                                        |
| Organization                         |                                                                                                                                                                                                                                                                                    |
| Report purpose                       | Stated or inferred                                                                                                                                                                                                                                                                 |
| Report audience                      | Stated or inferred                                                                                                                                                                                                                                                                 |
| <b>MAID provision: medications</b>   | <b>Description</b>                                                                                                                                                                                                                                                                 |
| Pharmaceuticals used – IV protocol   | Each pharmaceutical name, dose, route, frequency, speed of administration, stated or inferred purpose of each medication (eg. anxiolytic, sedation, pain control, antiemetic, paralytic) and frequency of use (optional vs obligatory); alternative medications in case of allergy |
| Pharmaceuticals used – Oral protocol | As above                                                                                                                                                                                                                                                                           |
| Other equipment used                 | If relevant                                                                                                                                                                                                                                                                        |
| Safety checks and documentation      | eg. use of a checklist; confirmation of consent; backup medications available, etc.                                                                                                                                                                                                |
| <b>MAID provision: location</b>      | <b>Description</b>                                                                                                                                                                                                                                                                 |
| Location of MAID provision           | Home, hospital, hospice, other, nursing home, self administration or voluntary euthanasia                                                                                                                                                                                          |
| <b>MAID provision: participants</b>  | <b>Description</b>                                                                                                                                                                                                                                                                 |
| Role of healthcare providers         | Profession, training/expertise, role in assisted dying                                                                                                                                                                                                                             |
| Role of families                     | Training/preparation; follow up care; bereavement care                                                                                                                                                                                                                             |
