# Supplementary material for: Provision of medical assistance in dying: a scoping review
Source: PubMed Central journal article supplement — BMJ Open. 2020 Jul 8;10(7):e036054. doi: 10.1136/bmjopen-2019-036054 (PMC7348461; doi:10.1136/bmjopen-2019-036054), 2020-07-08
Supplement: bmjopen-2019-036054supp003.pdf [file bmjopen-2019-036054supp003.pdf]

Supplemental file 3: List of studies included in the scoping review

1. The nurse's responsibility to the patient requesting assisted suicide. *Oncologic Nursing Society. Oncol Nurs Forum.* 2001 Apr;28(3):442.
2. Baron CH, Bergstresser C, Brock DW, Cole GF, Dorfman NS, Johnson JA, et al. A model state act to authorize and regulate physician-assisted suicide. *Harvard J Legis.* 1996;33(1):1–34.
3. Boissinot L, Benamou M, Léglise P, Mancret R-C, Huchon-Bécel D. [Euthanasia and / or medically assisted suicide: Reflection on the new responsibility of the hospital pharmacist]. *Ann Pharm Françaises* [Internet]. 2014;72(2):82–9. Available from: <http://www.sciencedirect.com/science/article/pii/S0003450913001582>
4. Burette P, Boüüaert C, Vanmeerbeek M, Giet D. Quatre ans d'application de la loi de dépenalisation de l'euthanasie en Belgique. *Press Medicale* [Internet]. 2008;37(9):1281–8. Available from: <http://www.sciencedirect.com/science/article/pii/S0755498208000778>
5. Chambaere K, Vander Stichele R, Mortier F, Cohen J, Deliens L. Recent trends in euthanasia and other end-of-life practices in Belgium. *N Engl J Med.* 2015; 372: 1179–81.
6. Chin AE, Hedberg K, Higginson GK, Fleming DW. Legalized physician-assisted suicide in Oregon--the first year's experience. *N Engl J Med.* 1999 Feb;340(7):577–83.
7. de Boer A, Sang Lau H, Porsius A. Physician-assisted death and pharmacy practice in the Netherlands. *N Engl J Med.* 1997 Oct; 337(15):1091–2.
8. Detry O, Laureys S, Faymonville M-E, De Roover A, Squifflet J-P, Lamy M, et al. Organ donation after physician-assisted death. *Transpl Int.* 2008 Sep; 21(9):915.
9. Dierckx de Casterle B, Denier Y, De Bal N, Gastmans C. Nursing care for patients requesting euthanasia in general hospitals in Flanders, Belgium. *J Adv Nurs.* 2010 Nov; 66(11): 2410–20.
10. Enck RE. Physician-assisted dying. *The American Journal of Hospice & Palliative Care.* 2010; 27(7): 441–3.
11. Groenewoud JH, van der Heide A, Onwuteaka-Philipsen BD, Willems DL, van der Maas PJ, van der Wal G. Clinical problems with the performance of euthanasia and physician-assisted suicide in The Netherlands. *N Engl J Med.* 2000 Feb; 342(8): 551–6.
12. Hopkins D, Boss M. Pharmacists' Right to Refuse to Dispense Prescriptions Based on Moral Grounds: A Summary of State Laws and Regulations. *Hosp Pharm* [Internet]. 2006 Dec 1;41(12): 1176–9. Available from: <https://doi.org/10.1310/hpj4112-1176>

13. Lewis P. Euthanasia in Belgium five years after legalisation. *Eur J Health Law*. 2009 Jun;16(2):125–38.
14. Loggers ET, Starks H, Shannon-Dudley M, Back AL, Appelbaum FR, Stewart FM. Implementing a Death with Dignity program at a comprehensive cancer center. *N Engl J Med*. 2013 Apr;368(15):1417–24.
15. Meek C. Pharmacy involvement where assisted suicide and euthanasia are permitted. *Pharm J*. 2006;277:614.
16. Meier DE, Emmons CA, Wallenstein S, Quill T, Morrison RS, Cassel CK. A national survey of physician-assisted suicide and euthanasia in the United States. *N Engl J Med*. 1998 Apr;338(17):1193–201.
17. Ogden R. The right to die: a policy proposal for euthanasia and aid in dying. *Can Public Policy*. 1994 Mar;20(1):1–25.
18. Pereira J, Laurent P, Cantin B, Petremand D, Currat T. The response of a Swiss university hospital's palliative care consult team to assisted suicide within the institution. *Palliat Med*. 2008 Jul;22(5):659–67.
19. Rurup ML, Onwuteaka-Philipsen BD, Heide A va. der, Wal G va. der, Maas PJ va. der. [Trends in means used in euthanasia and coherence with it number of notifications]. *Dutch J Med*. 2006;18(150):11.
20. Smith KA, Goy ER, Harvath TA, Ganzini L. Quality of death and dying in patients who request physician-assisted death. *Palliat Med*. 2011 Apr;14(4):445–50.
21. van der Arend AJ. Euthanasia and assisted suicide in The Netherlands: clarifying the practice and the nurse's role. *Int Nurs Rev*. 1998;45(5):145–51.
22. Vander Stichele RH, Bilsen JJR, Bernheim JL, Mortier F, Deliens L. Drugs used for euthanasia in Flanders, Belgium. *Pharmacoepidemiol Drug Saf*. 2004 Feb;13(2):89–95.
23. Werth JLJ, Wineberg H. A critical analysis of criticisms of the Oregon Death with Dignity Act. *Death Stud*. 2005;29(1):1–27.
24. Final report of the Netherlands State Commission on Euthanasia: an English summary. *Bioethics*. 1987 Apr;1(2):163–74.
25. Asch DA. The role of critical care nurses in euthanasia and assisted suicide. *N Engl J Med*. 1996 May;334(21):1374–9.
26. Benrubi GI. Euthanasia--the need for procedural safeguards. *N Engl J Med*. 1992 Jan;326(3):197–9.

27. Bilsen JJR, Vander Stichele RH, Mortier F, Deliens L. Involvement of nurses in physician-assisted dying. *J Adv Nurs*. 2004 Sep;47(6):583–91.
28. Bosshard G, Fischer S, Bar W. Open regulation and practice in assisted dying. *Swiss Med Wkly*. 2002 Oct;132(37–38):527–34.
29. Bosshard G, Ulrich E, Bar W. 748 cases of suicide assisted by a Swiss right-to-die organisation. *Swiss Med Wkly*. 2003 May;133(21–22):310–7.
30. Chabot BE, Goedhart A. A survey of self-directed dying attended by proxies in the Dutch population. *Soc Sci Med*. 2009 May;68(10):1745–51.
31. De Beer T, Gastmans C, Dierckx de Casterle B. Involvement of nurses in euthanasia: a review of the literature. *J Med Ethics*. 2004 Oct;30(5):494–8.
32. Emanuel EJ, Daniels ER, Fairclough DL, Clarridge BR. The practice of euthanasia and physician-assisted suicide in the United States: adherence to proposed safeguards and effects on physicians. *JAMA*. 1998 Aug;280(6):507–13.
33. Ganzini L, Goy ER, Dobscha SK, Prigerson H. Mental health outcomes of family members of Oregonians who request physician aid in dying. *J Pain Symptom Manage*. 2009 Dec;38(6):807–15.
34. Hall JK. Assisted suicide: nurse practitioners as providers? *Nurse Pract*. 1996 Oct;21(10):63-66,71.
35. Hedberg K, Hopkins D, Kohn M. Five years of legal physician-assisted suicide in Oregon. Vol. 348, *The New England journal of medicine*. United States; 2003. p. 961–4.
36. Hedberg K, Hopkins D, Southwick K. Legalized physician-assisted suicide in Oregon, 2001. Vol. 346, *The New England journal of medicine*. United States; 2002. p. 450–2.
37. Inghelbrecht E, Bilsen J, Mortier F, Deliens L. The role of nurses in physician-assisted deaths in Belgium. *CMAJ*. 2010 Jun;182(9):905–10.
38. Lossignol D, Libert I, Michel B, Dumitrescu C, Obiols M, Rosseau C. End of life decision, euthanasia, in a belgian supportive care unit. Abstracts of the 2011 International MASCC/ISOO (Multinational Association of Supportive Care in Cancer/International Society for Oral Oncology) Symposium. June 23-25, 2011. Athens, Greec. *Supportive Care in Cancer*. 2011. 19 (Suppl 2):S67-370.

39. Matzo ML, Emanuel EJ. Oncology nurses' practices of assisted suicide and patient-requested euthanasia. *Oncol Nurs Forum*. 1997;24(10):1725–32.
40. Meier DE, Emmons C-A, Litke A, Wallenstein S, Morrison RS. Characteristics of patients requesting and receiving physician-assisted death. *Arch Intern Med*. 2003 Jul;163(13):1537–42.
41. Naafs NJ. Pharmaceutical care until the end: the role of pharmacists in euthanasia in The Netherlands. *Pharm World Sci*. 2001 Aug;23(4):129–31.
42. O'Brien CN, Madek GA, Ferrera GR. Oregon's guidelines for physician-assisted suicide: a legal and ethical analysis. *Univ Pittsbg Law Rev*. 2000;61(2):329–65.
43. Onwuteaka-Philipsen BD, Muller MT, van der Wal G. Euthanatics: implementation of a protocol to standardise euthanatics among pharmacists and GPs. *Patient Educ Couns*. 1997 Jun;31(2):131–7.
44. Onwuteaka-Philipsen BD, Muller MT, van der Wal G, van Eijk JT, Ribbe MW. Active voluntary euthanasia or physician-assisted suicide? *J Am Geriatr Soc*. 1997 Oct;45(10):1208–13.
45. Onwuteaka-Philipsen BD, Muller MT, van der Wal G, van Eijk JT, Ribbe MW. Attitudes of Dutch general practitioners and nursing home physicians to active voluntary euthanasia and physician-assisted suicide. *Arch Fam Med*. 1995 Nov;4(11):951–5.
46. Onwuteaka-Philipsen BD, van der Wal G. Cases of euthanasia and physician assisted suicide among AIDS patients reported to the Public Prosecutor in North Holland. *Public Health*. 1998 Jan;112(1):53–6.
47. Rurup ML, Smets T, Cohen J, Bilsen J, Onwuteaka-Philipsen BD, Deliens L. The first five years of euthanasia legislation in Belgium and the Netherlands: description and comparison of cases. *Palliat Med*. 2012 Jan;26(1):43–9.
48. Spencer DE. Practical implications for health care providers in a physician-assisted suicide environment. *Seattle Univ Law Rev*. 1995;18(3):545–56.
49. Swarte NB, Heintz AP. Euthanasia and physician-assisted suicide. *Ann Med*. 1999 Dec;31(6):364–71.
50. Swarte NB, Heintz AP. Guidelines for an acceptable euthanasia procedure. *Best Pract Res Clin Obstet Gynaecol*. 2001 Apr;15(2):313–21.
51. van Bruchem-van de Scheur GG, van der Arend AJG, Spreeuwenberg C, Abu-Saad HH, ter Meulen RHJ. Euthanasia and physician-assisted suicide in the Dutch homecare sector: the role of the district nurse. *J Adv Nurs*. 2007 Apr;58(1):44–52.

52. van de Scheur A, van der Arend A. The role of nurses in euthanasia: a Dutch study. *Nurs Ethics*. 1998 Nov;5(6):497–508.
53. van der Kloot Meijburg HH. How health care institutions in the Netherlands approach physician assisted death. *Omega*. 32(3):179–96.
54. van der Maas PJ, van der Wal G, Haverkate I, de Graaff CL, Kester JG, Onwuteaka-Philipsen BD, et al. Euthanasia, physician-assisted suicide, and other medical practices involving the end of life in the Netherlands, 1990-1995. *N Engl J Med*. 1996 Nov;335(22):1699–705.
55. van der Wal G, van Eijk JT, Leenen HJ, Spreeuwenberg C. [The use of drugs for euthanasia and assisted suicide in family practice]. *Ned Tijdschr Geneesk*. 1992 Jul;136(27):1299–305.
56. Varadarajan R, Freeman RA, Parmar JR. Aid-in-dying practice in Europe and the United States: Legal and ethical perspectives for pharmacy. *Res Social Adm Pharm*. 2016 Nov;12(6):1016–25.
57. Willems DL, Groenewoud JH, van der Wal G. Drugs used in physician-assisted death. *Drugs Aging*. 1999 Nov;15(5):335–40.
58. Bollen J, de Jongh W, Hagenars J, van Dijk G, Ten Hoopen R, Ysebaert D, et al. *Organ Donation After Euthanasia: A Dutch Practical Manual*. *Am J Transplant*. 2016 Jul;16(7):1967–72.
59. Bilsen J, Bauwens M, Bernheim J, Stichele R Vander, Deliens L. Physician-assisted death: attitudes and practices of community pharmacists in East Flanders, Belgium. *Palliat Med*. 2005 Mar;19(2):151–7.
60. Blanke C, LeBlanc M, Hershman D, Ellis L, Meyskens F. Characterizing 18 Years of the Death With Dignity Act in Oregon. *JAMA Oncol*. 2017 Oct;3(10):1403–6.
61. Boissinot L, Benamou M, Leglise P, Mancret R-C, Huchon-Becel D. [Euthanasia and/or medically assisted suicide: Reflection on the new responsibility of the hospital pharmacist]. *Ann Pharm Fr*. 2014 Mar;72(2):82–9.
62. Bosshard G. [Assisted suicide - medical, legal, and ethical aspects]. *Praxis (Bern)* 1994. 2012 Feb;101(3):183–9.
63. Bosshard G, Zellweger U, Bopp M, Schmid M, Hurst SA, Puhan MA, et al. Medical End-of-Life Practices in Switzerland: A Comparison of 2001 and 2013. *JAMA Intern Med*. 2016 Apr;176(4):555–6.

64. Campbell CS, Cox JC. Hospice-assisted death? A study of Oregon hospices on death with dignity. *Am J Hosp Palliat Care*. 2012 May;29(3):227–35.
65. Chambaere K, Bilsen J, Cohen J, Onwuteaka-Philipsen BD, Mortier F, Deliens L. Physician-assisted deaths under the euthanasia law in Belgium: a population-based survey. *CMAJ*. 2010 Jun;182(9):895–901.
66. Cohen-Almagor R, Hartman MG. The Oregon Death with Dignity Act: review and proposals for improvement. *J Legis*. 2001;27(2):269–98.
67. Crouch BI. Toxicological Issues with Drugs Used to End Life. *J Pharm Care Pain Symptom Control* [Internet]. 1996 Jan 1;4(1–2):211–22. Available from: [https://doi.org/10.1300/J088v04n01-2\\_04](https://doi.org/10.1300/J088v04n01-2_04)
68. Dunn P, Reagan B, Tolle SW, Foreman S. The Oregon Death with Dignity Act: A Guidebook for Health Care Providers, edited by Kathleen Haley and Melinda Lee. The Task Force to Improve the Care of Terminally-Ill Oregonians. United States; 2008 Jul.
69. Emanuel EJ, Fairclough D, Clarridge BC, Blum D, Bruera E, Penley WC, et al. Attitudes and practices of U.S. oncologists regarding euthanasia and physician-assisted suicide. *Ann Intern Med*. 2000 Oct;133(7):527–32.
70. Emanuel EJ. Euthanasia and physician-assisted suicide: a review of the empirical data from the United States. *Arch Intern Med*. 2002 Jan;162(2):142–52.
71. Englert M. Depenalized practice of euthanasia in Belgium: evolution from 2002 to 2005 and interpretation of differences between the North and South of the country. *Med J Brussels*. 2007;28:423–30.
72. Evrard P. Belgian Modified Classification of Maastricht for Donors After Circulatory Death on behalf of the Belgian Working Group on DCD National Protocol. In: *Transplantation Proceedings* [Internet]. Elsevier; 2014. p. 3138–42. Available from: [http://www.transplantation-proceedings.org/article/S0041-1345\(14\)01019-7/pdf](http://www.transplantation-proceedings.org/article/S0041-1345(14)01019-7/pdf)
73. Finlay IG, van Dijk B. Euthanasia: the Dutch experience and what it entails in practice. *Lancet Oncol*. 2002 Mar;3(3):135–6.
74. Fischer S, Huber CA, Imhof L, Mahrer Imhof R, Furter M, Ziegler SJ, et al. Suicide assisted by two Swiss right-to-die organisations. *J Med Ethics*. 2008 Nov;34(11):810–4.
75. 1. de Wachter MAM. Active Euthanasia in the Netherlands. *JAMA* [Internet]. 1989 Dec 15;262(23):3316–9. Available from: <https://doi.org/10.1001/jama.1989.03430230101034>
76. Hiscox WE. Physician-Assisted Suicide in Oregon: The ‘Death with Dignity’ Data. *Med Law Int* [Internet]. 2007 Sep 1;8(3):197–220. Available from: <https://doi.org/10.1177/096853320700800301>

77. Horikx A, Admiraal P V. [Utilization of euthanatic agents; experience of physicians with 227 patients, 1998-2000]. *Ned Tijdschr Geneeskd*. 2000 Dec;144(52):2497–500.
78. Inghelbrecht E, Bilsen J, Mortier F, Deliëns L. Factors related to the involvement of nurses in medical end-of-life decisions in Belgium: a death certificate study. *Int J Nurs Stud*. 2008 Jul;45(7):1022–31.
79. Jamison S. When Drugs Fail: Assisted Deaths and Not-So-Lethal Drugs. *J Pharm Care Pain Symptom Control* [Internet]. 1996 Jan 1;4(1–2):223–43. Available from: [https://doi.org/10.1300/J088v04n01-2\\_05](https://doi.org/10.1300/J088v04n01-2_05)
80. Kimsma GK. Euthanasia and Euthanizing Drugs in The Netherlands. *J Pharm Care Pain Symptom Control* [Internet]. 1996 Jan 1;4(1–2):193–210. Available from: [https://doi.org/10.1300/J088v04n01-2\\_03](https://doi.org/10.1300/J088v04n01-2_03)
81. Kompanje EJO, de Beaufort ID, Bakker J. Euthanasia in intensive care: a 56-year-old man with a pontine hemorrhage resulting in a locked-in syndrome. *Crit Care Med*. 2007 Oct;35(10):2428–30.
82. Lalmohamed A, Horikx A. [Experience with euthanasia since 2007. Analysis of problems with execution]. Vol. 154, *Nederlands tijdschrift voor geneeskunde*. 2010. A1882 p.
83. Lau HS, Riezebos J, Abas V, Porsius AJ, De Boer A. A nation-wide study on the practice of euthanasia and physician-assisted suicide in community and hospital pharmacies in The Netherlands. *Pharm World Sci*. 2000 Feb;22(1):3–9.
84. Lemiengre J, Dierckx de Casterle B, Denier Y, Schotsmans P, Gastmans C. How do hospitals deal with euthanasia requests in Flanders (Belgium)? A content analysis of policy documents. *Patient Educ Couns*. 2008 May;71(2):293–301.
85. Lossignol D. [Euthanasia: medications and medical procedures]. *Rev Med Brux*. 2008 Sep;29(4):435–40.
86. Oregon Nurses Association. Guidelines on the nurse’s role related to the death with dignity act. 2001.
87. Pasman HRW, Wolf JEH, Hesselink BAM, van der Heide A, van der Wal G, van der Maas PJ, et al. Policy statements and practice guidelines for medical end-of-life decisions in Dutch health care institutions: developments in the past decade. *Health Policy*. 2009 Sep;92(1):79–88.
88. Pennec S, Riou F, Gaymu J, Pontone S, Aubry R. Physician-assisted deaths in France: results from a nationwide survey. *Presse Med*. 2015;44(7–8):864–7.

89. Rietjens JAC, van Delden JJM, van der Heide A, Vrakking AM, Onwuteaka-Philipsen BD, van der Maas PJ, et al. Terminal sedation and euthanasia: a comparison of clinical practices. *Arch Intern Med*. 2006 Apr;166(7):749–53.
90. Rietjens JAC, van der Maas PJ, Onwuteaka-Philipsen BD, van Delden JJM, van der Heide A. Two Decades of Research on Euthanasia from the Netherlands. What Have We Learnt and What Questions Remain? *J Bioeth Inq*. 2009 Sep;6(3):271–83.
91. Schildmann J, Hoetzel J, Mueller-Busch C, Vollmann J. End-of-life practices in palliative care: a cross sectional survey of physician members of the German Society for Palliative Medicine. *Palliat Med*. 2010 Dec;24(8):820–7.
92. Smets T, Bilsen J, Cohen J, Rurup ML, De Keyser E, Deliens L. The medical practice of euthanasia in Belgium and The Netherlands: legal notification, control and evaluation procedures. *Health Policy*. 2009 May;90(2–3):181–7.
93. Smets T, Bilsen J, Cohen J, Rurup ML, Deliens L. Legal euthanasia in Belgium: characteristics of all reported euthanasia cases. *Med Care*. 2010 Feb;48(2):187–92.
94. Smets T, Bilsen J, Cohen J, Rurup ML, Mortier F, Deliens L. Reporting of euthanasia in medical practice in Flanders, Belgium: cross sectional analysis of reported and unreported cases. *BMJ*. 2010 Oct;341:c5174.
95. Smets T, Bilsen J, Van den Block L, Cohen J, Van Casteren V, Deliens L. Euthanasia in patients dying at home in Belgium: interview study on adherence to legal safeguards. *Br J Gen Pract*. 2010 Apr;60(573):e163-70.
96. Sprij B. [Could it be a little less? Let the dose of thiopental in euthanasia depend on the body weight]. *Ned Tijdschr Geneesk*. 2010;154(43).
97. Thienpont L, Verhofstadt M, Van Loon T, Distelmans W, Audenaert K, De Deyn PP. Euthanasia requests, procedures and outcomes for 100 Belgian patients suffering from psychiatric disorders: a retrospective, descriptive study. *BMJ Open*. 2015 Jul;5(7):e007454.
98. van Bruchem-van de Scheur GG, van der Arend AJG, Huijter Abu-Saad H, van Wijmen FCB, Spreeuwenberg C, Ter Meulen RHJ. Euthanasia and assisted suicide in Dutch hospitals: the role of nurses. *J Clin Nurs*. 2008 Jun;17(12):1618–26.
99. van Bruchem-van de Scheur GAG, van der Arend AJG, Abu-Saad HH, van Wijmen FCB, Spreeuwenberg C, ter Meulen RHJ. Alleviation of pain and symptoms with a life-shortening intention. *Nurs Ethics*. 2008 Sep;15(5):682–95.
100. van der Heide A, Onwuteaka-Philipsen B, Rurup M, Buiting H, van Delden J, Hanssen-de Wolf J, et al. Medical decisions regarding the end of life in the Netherlands after the Euthanasia Act came into force; fourth national survey. *Dutch J Med*. 2007;151:1635–42.



101. van der Heide A, Onwuteaka-Philipsen BD, Rurup ML, Buiting HM, van Delden JJM, Hanssen-de Wolf JE, et al. End-of-life practices in the Netherlands under the Euthanasia Act. *N Engl J Med*. 2007 May;356(19):1957–65.
102. van Heest FB, Finlay IG, Kramer JJE, Otter R, Meyboom-de Jong B. Telephone consultations on palliative sedation therapy and euthanasia in general practice in The Netherlands in 2003: a report from inside. *Fam Pract*. 2009 Dec;26(6):481–7.
103. van Marwijk H, Haverkate I, van Royen P, The A-M. Impact of euthanasia on primary care physicians in the Netherlands. *Palliat Med*. 2007 Oct;21(7):609–14.
104. Wineberg H. Oregon’s Death with Dignity Act: fourteen months and counting. *Arch Intern Med*. 2000 Jan;160(1):21–3.
105. Ziegler SJ, Bosshard G. Role of non-governmental organisations in physician assisted suicide. *BMJ*. 2007 Feb;334(7588):295–8.
106. Medical Assistance in Dying: Parenteral Pharmacologic Recommendations. Health PEI; 2016.
107. KNMG/KNMP Guidelines for the practice of Euthanasia and Physician-Assisted Suicide 2012. <https://www.knmg.nl/web/file?uuid=c56c038c-ffcd-486e-a77407f7de104f94&owner=5c945405-d6ca-4deb-aa16-7af2088aa173&contentid=223&elementid=2003770>. Accessed June 2017.
108. Euthanasia: a “kit” sold in Belgian pharmacies. *Prescrire Int*. 2005 Oct;14(79):197.
109. Assistance in Dying Oversight Group (February 8 2016). *Assistance in Dying - P&P INT*. Unpublished internal document, Trillium Health Partners.
110. Author unknown (2017). *UHN Information for MAID Intervention*. Unpublished internal document, University Health Network.
111. Author unknown (April 2016). *Physician’s Orders, Medical Assistance in Dying (MAID)*. Unpublished internal document, The Ottawa Hospital/L’Hopital d’Ottawa
112. Author unknown (June 2017). *Medication protocol for MAID*. Unpublished Internal document. Southlake Regional Health Centre.
113. Author unknown. (June 2016) *Medication protocol for MAID*. Unpublished Internal document. Oakville Trafalgar Memorial Hospital.

114. Author Unknown. (June 2016). *Medical Assistance in Dying (MAID) - Physician Administered IV Protocol*. Unpublished Internal Document. Nova Scotia Health Authority
115. Author Unknown. (April 2017) *Prescription for medical Assistance in Dying (MAID), Physician or Nurse Practitioner-Administered*. Unpublished internal document. Vitalité Health Network and Horizon Health Network.
116. Author unknown. (2016) *Medical assistance in dying order set*. Unpublished Internal Document, Kingston General Hospital.
117. Author unknown. (November 29 2016) *MAiD (Medical Aid in Dying) Prescription*. Unpublished internal document, Brockville General Hospital.
118. Author unknown. (February 8, 2018). *British Columbia Medical Assistance in Dying Prescription*. Unpublished internal document, British Columbia Ministry of Health.
119. Author unknown. (July 9, 2019). *Medical Assistance in Dying Medication Protocols*. Unpublished internal document, Alberta Health Services, Alberta College of Pharmacists, College of Physicians and Surgeons of Alberta College and Association of Registered Nurses of Alberta.
120. Author unknown. (June 2017) *Standardized Prescription for Medical Assistance in Dying (MAID) in Manitoba*. Unpublished internal document, The Manitoba Provincial Medical Assistance in Dying Clinical Team.
121. Author unknown. (November 2018). *MAID medication prescription*. Unpublished internal document. Brantford, Ontario
122. Author unknown. (April 2017) *Medical Prescription*. Unpublished internal document. Collège des médecins du Québec.
123. Author unknown. (July 2016). *Prescription protocol for practitioner-administered medical assistance in dying (injection)*. Unpublished internal document, Government of Saskatchewan.
124. Borgsteede SD, Rhodius CA, De Smet PAGM, Pasman HRW, Onwuteaka-Philipsen BD, Rurup ML. The use of opioids at the end of life: knowledge level of pharmacists and cooperation with physicians. *Eur J Clin Pharmacol*. 2011;67(1):79–89.
125. Bosshard G, Broeckert B, Clark D, Materstvedt LJ, Gordijn B, Müller-Busch HC. A role for doctors in assisted dying? An analysis of legal regulations and medical professional positions in six European countries. *J Med Ethics*. 2008;34(1):28–32.

126. Burkhardt S, Macias A, Jousset N, La Harpe R. Assisted suicide: experiences and debates in Switzerland. *Med Droit*. 2015;155–60.
127. Campbell CS, Black MA. Dignity, death, and dilemmas: a study of Washington hospices and physician-assisted death. *J Pain Symptom Manage*. 2014 Jan;47(1):137–53.
128. De Casterlé BD, Verpoort C, De Bal N, Gastmans C. Nurses' views on their involvement in euthanasia: a qualitative study in Flanders (Belgium). *J Med Ethics*. 2006;32(4):187–92.
129. Dees MK, Vernooij-Dassen MJ, Dekkers WJ, Elwyn G, Vissers KC, van Weel C. Perspectives of decision-making in requests for euthanasia: a qualitative research among patients, relatives and treating physicians in the Netherlands. *Palliat Med*. 2013 Jan;27(1):27–37.
130. Dierickx S, Deliens L, Cohen J, Chambaere K. Involvement of Palliative Care in People Receiving Euthanasia. In: Abstracts of the 9th World Research Congress of the European Association for Palliative Care (EAPC). 2016.
131. Fass J, Fass A. Physician-assisted suicide: ongoing challenges for pharmacists. *Am J Health Syst Pharm*. 2011 May;68(9):846–9.
132. Francke AL, Albers G, Bilsen J, de Veer AJE, Onwuteaka-Philipsen BD. Nursing staff and euthanasia in the Netherlands. A nation-wide survey on attitudes and involvement in decision making and the performance of euthanasia. *Patient Educ Couns*. 2016;99(5):783–9.
133. Grube D. Oregon: Aid in Dying - Drug Protocol - Chloral Hydrate, Phenobarbital and Morphine. 2014.
134. Hedberg K, Hopkins D, Leman R, Kohn M. The 10-year experience of Oregon's Death with Dignity Act: 1998-2007. *J Clin Ethics*. 2009;20(124–32).
135. Hesselink BAM, Onwuteaka-Philipsen BD, Janssen A, Buiting HM, Kollau M, Rietjens JAC, et al. Do guidelines on euthanasia and physician-assisted suicide in Dutch hospitals and nursing homes reflect the law? A content analysis. *J Med Ethics*. 2012;38(1):35–42.
136. Hicks MH-R. Physician-assisted suicide: a review of the literature concerning practical and clinical implications for UK doctors. *BMC Fam Pract*. 2006;7(1):39.
137. Lemiengre J, De Casterlé BD, Denier Y, Schotsmans P, Gastmans C. Content analysis of euthanasia policies of nursing homes in Flanders (Belgium). *Med Heal Care Philos*. 2009;12(3):313–22.
138. Ministerio de Salud. Protocolo para la aplicación del procedimiento de eutanasia en Colombia [Internet]. 2015. Available from:

- <https://www.minsalud.gov.co/sites/rid/Lists/Biblioteca-Digital/RIDE/DE/CA/Protocolo-aplicacion-procedimiento-eutanasia-colombia.pdf>. Accessed June 2017.
139. Ogden RD, Hamilton WK, Whitcher C. Assisted suicide by oxygen deprivation with helium at a Swiss right-to-die organisation. *J Med Ethics*. 2010;36(3):174–9.
  140. Onwuteaka-Philipsen BD, Brinkman-Stoppelenburg A, Penning C, de Jong-Krul GJF, van Delden JJM, van der Heide A. Trends in end-of-life practices before and after the enactment of the euthanasia law in the Netherlands from 1990 to 2010: a repeated cross-sectional survey. *Lancet*. 2012;380(9845):908–15.
  141. Smets T, Bilsen J, Cohen J, Rurup ML, Mortier F, Deliens L. Medical decisions at the end of life in flanders, Belgium - A nationwide post-mortem survey of euthanasia cases reported and unreported to the federal review committee. *Palliat Med*. 2010;24(4):S46.
  142. Sullivan AD, Hedberg K, Fleming DW. Legalized Physician-Assisted Suicide in Oregon - The Second Year. *N Engl J Med* [Internet]. 2000 Feb 24;342(8):598–604. Available from: <https://doi.org/10.1056/NEJM200002243420822>
  143. Wang LH, Elliott MA, Jung Henson L, Gerena-Maldonado E, Strom S, Downing S, et al. Death with dignity in Washington patients with amyotrophic lateral sclerosis. *Neurology*. 2016 Nov;87(20):2117–22.
  144. Washington State Department of Health. Death with Dignity Act Report Executive Summary. [Internet]. 2015. Available from: <http://www.doh.wa.gov/portals/1/Documents/Pubs/422-109-DeathWithDignityAct2015.pdf> . Accessed June 2017.
  145. Weiss E, Downar J, editors. Ontario Maid Provider Handbook. [Internet]. Ontario College of Family Physicians Collaborative Mentoring Networks; 2018. Available from: <https://www.ontariofamilyphysicians.ca/files/maid-handbook-0-2-2018-august-2.pdf>.
  146. Ysebaert D, Detry O, Verfailli G, Mikhalski D, Van Raemdonck D. Abstracts of the 17th Congress of the European Society for Organ Transplantation 13 - 16 September 2015, Brussels, Belgium. *Transpl Int*. 2015 Nov;28 Suppl 4:1–856.
  147. Emanuel EJ, Onwuteaka-Philipsen BD, Urwin JW, Cohen J. Attitudes and Practices of Euthanasia and Physician-Assisted Suicide in the United States, Canada, and Europe. *JAMA*. 2016 Jul;316(1):79–90.
  148. Al Rabadi L, LeBlanc M, Bucy T, Ellis LM, Hershman DL, Meyskens Jr FL, et al. Trends in Medical Aid in Dying in Oregon and Washington. *JAMA Netw Open* [Internet]. 2019 Aug 9;2(8):e198648–e198648. Available from: <https://doi.org/10.1001/jamanetworkopen.2019.8648>

149. Ball IM, Hodge B, Jansen S, Nickle S, Sibbald RW. A Canadian Academic Hospital's Initial MAID Experience: A Health-Care Systems Review. *J Palliat Care*. 2019 Apr;34(2):78–84.
150. Beardsley C, Brown K, Sandroussi C. Euthanasia and surgeons: an overview of the Victorian Voluntary Assisted Dying Act 2017 and its relevance to surgical practice in Australia. *ANZ J Surg*. 2018 Oct;88(10):956–8.
151. Blanke CD, Leblanc M, Hershman D, Meyskens F, Taylor L, Ellis LM. Medical-aid-in-dying use in the US Pacific Northwest. *Ann Oncol* [Internet]. 2018 Oct 1;29:viii555–6. Available from: <https://doi.org/10.1093/annonc/mdy295.026>
152. Blanke C, LeBlanc M, Hershman D, Ellis L, Meyskens F. Characterizing 18 Years of the Death With Dignity Act in Oregon. *JAMA Oncol*. 2017 Oct;3(10):1403–6.
153. Buchbinder M, Ojo E, Knio L, Brassfield ER. Caregivers' Experiences With Medical Aid-In-Dying in Vermont: A Qualitative Study. *J Pain Symptom Manage*. 2018 Dec;56(6):936–43.
154. Dierickx S, Cohen J, Vander Stichele R, Deliens L, Chambaere K. Drugs Used for Euthanasia: A Repeated Population-Based Mortality Follow-Back Study in Flanders, Belgium, 1998-2013. *J Pain Symptom Manage*. 2018 Oct;56(4):551–9.
155. Dierickx S, Deliens L, Cohen J, Chambaere K. Involvement of palliative care in euthanasia practice in a context of legalized euthanasia: A population-based mortality follow-back study. *Palliat Med*. 2018 Jan;32(1):114–22.
156. Hales BM, Bean S, Isenberg-Grzeda E, Ford B, Selby D. Improving the Medical Assistance in Dying (MAID) process: A qualitative study of family caregiver perspectives. *Palliat Support Care*. 2019 Oct;17(5):590–5.
157. Harty C, Chaput AJ, Trouton K, Buna D, Naik VN. Oral medical assistance in dying (MAiD): informing practice to enhance utilization in Canada. *Can J Anaesth*. 2019 Sep;66(9):1106–12.
158. Hedberg K, New C. Oregon's Death With Dignity Act: 20 Years of Experience to Inform the Debate. *Ann Intern Med*. 2017 Sep 19;167.
159. Hughes MT. The pharmacist and medical aid in dying. *Am J Heal Pharm* [Internet]. 2017 Aug 15;74(16):1253–60. Available from: <https://doi.org/10.2146/ajhp170122>
160. Hurst SA, Zellweger U, Bosshard G, Bopp M. Medical end-of-life practices in Swiss cultural regions: a death certificate study. *BMC medicine*. 2018 Dec;16(1):54. Available from: <https://doi.org/10.1186/s12916-018-1043-5>

161. Li M, Watt S, Escaf M, Gardam M, Heesters A, O’Leary G, et al. Medical Assistance in Dying — Implementing a Hospital-Based Program in Canada. *N Engl J Med* [Internet]. 2017 May 24;376(21):2082–8. Available from: <https://doi.org/10.1056/NEJMms1700606>
162. Riley SR, Overbeek A, van der Heide A. Physician adherence to clinical guidelines in euthanasia and assisted suicide in the Netherlands: a qualitative study. *Fam Pract*. 2019 Nov;
163. Silviu JL, Memon A, Arain M. Medical Assistance in Dying: Alberta Approach and Policy Analysis. *Can J Aging*. 2019 Sep;38(3):397–406.
164. Wang DH. No Easy Way Out: A Case of Physician-Assisted Dying in the Emergency Department. *Ann Emerg Med* [Internet]. 2018 Aug 1;72(2):206–10. Available from: <https://doi.org/10.1016/j.annemergmed.2017.08.056>
