# Supplementary material for: Provision of medical assistance in dying: a scoping review
Source: PubMed Central journal article supplement — BMJ Open. 2020 Jul 8;10(7):e036054. doi: 10.1136/bmjopen-2019-036054 (PMC7348461; doi:10.1136/bmjopen-2019-036054), 2020-07-08
Supplement: bmjopen-2019-036054supp004.pdf [file bmjopen-2019-036054supp004.pdf]

Supplemental file 4: Sources of evidences and data extracted

| <b>Author</b>                               | <b>Type of Study/Report Type</b> | <b>Year</b> | <b>Country</b> | <b>Protocol Described</b> | <b>Location of MAID Provision</b> |
|---------------------------------------------|----------------------------------|-------------|----------------|---------------------------|-----------------------------------|
| Oncology Nursing Society Board of Directors | Position Statement               | 2001        | USA            | Not specified             | Not specified                     |
| Baron et al.                                | Review                           | 1996        | USA            | Not specified             | Not specified                     |
| Boissinot et al.                            | Review                           | 2014        | France         | IV and Oral               | Hospital                          |
| Burette et al.                              | Review                           | 2008        | Belgium        | IV and Oral               | Home, hospital, hospice           |
| Chambaere et al.                            | Survey                           | 2015        | Belgium        | Not specified             | Not specified                     |
| Chin et al.                                 | Cohort study                     | 1999        | USA            | Not specified             | Not specified                     |
| De Boer et al.                              | Survey                           | 1997        | Netherlands    | IV and Oral               | Not specified                     |
| Detry et al.                                | Case Report                      | 2008        | Belgium        | Not specified             | Hospital                          |
| de Casterle et al.                          | Qualitative study                | 2010        | Belgium        | Not specified             | Hospital                          |
| Enck                                        | Review                           | 2010        | Belgium        | Not specified             | Home                              |
| Groenewoud et al.                           | Qualitative study                | 2000        | Netherlands    | IV                        | Not specified                     |
| Hopkins & Boss                              | Cross-Sectional study            | 2006        | USA            | Not specified             | Not specified                     |
| Lewis                                       | Review                           | 2009        | Belgium        | IV and Oral               | Hospital (50%), Home, (45%)       |
| Loggers et al                               | Review                           | 2013        | USA            | Oral                      | Home, hospice                     |
| Meek                                        | Review                           | 2006        | Multi-region   | Not specified             | Not specified                     |
| Meier et al.                                | Survey                           | 1998        | USA            | IV                        | Not specified                     |
| Ogden                                       | Review                           | 1994        | Canada         | Not specified             | Not specified                     |
| Pereira et al.                              | Review                           | 2008        | Switzerland    | Not specified             | Hospital or NGO Headquarters      |
| Rurup et al.                                | Cross-sectional study            | 2006        | Netherlands    | IV                        | Not specified                     |

|                                            |                       |      |                                                                   |               |                                                                                 |
|--------------------------------------------|-----------------------|------|-------------------------------------------------------------------|---------------|---------------------------------------------------------------------------------|
| Smith et al.                               | Cross-sectional study | 2011 | USA                                                               | Not specified | Home, hospice                                                                   |
| van der Arend                              | Review                | 1998 | Netherlands                                                       | Not specified | Not specified                                                                   |
| Vander Stichele et al.                     | Survey                | 2004 | Belgium                                                           | IV            | Home, Hospital                                                                  |
| Werth & Wineberg                           | Review                | 2005 | USA                                                               | Oral          | Home, Nursing home, Hospital                                                    |
| Netherlands State Commission on Euthanasia | Review                | 1987 | Netherlands                                                       | Not specified | Not specified                                                                   |
| Asch                                       | Review                | 1996 | USA                                                               | Not specified | Not specified                                                                   |
| Benrubi                                    | Review                | 1992 | Netherlands                                                       | Not specified | Not specified                                                                   |
| Bilsen et al.                              | Survey                | 2004 | Belgium                                                           | Not specified | Institution, Home                                                               |
| Bosshard et al.                            | Review                | 2002 | Multi-region (The Netherlands, Oregon, and Switzerland)           | Not specified | Not specified                                                                   |
| Bosshard et al.                            | Cohort study          | 2003 | Switzerland                                                       | IV and Oral   | Not specified                                                                   |
| Chabot & Goedhart                          | Survey                | 2009 | Netherlands                                                       | Not specified | Home                                                                            |
| De Beer et al.                             | Systematic review     | 2004 | Multi-region (The Netherlands, Australia, Belgium, Japan, Oregon) | Not specified | Not specified                                                                   |
| Emanuel et al.                             | Survey                | 1998 | USA                                                               | IV            | Not specified                                                                   |
| Ganzini et al.                             | Survey                | 2009 | USA                                                               | Not specified | Not specified                                                                   |
| Hall                                       | Review                | 1996 | USA                                                               | Not specified | Not specified                                                                   |
| Hedberg et al.                             | Cohort study          | 2003 | USA                                                               | IV            | Home (94%), Long-term care, assisted living, or foster care (5%), hospital (1%) |

|                                   |                   |      |                                        |               |                              |
|-----------------------------------|-------------------|------|----------------------------------------|---------------|------------------------------|
| Hedberg et al.                    | Cohort study      | 2002 | USA                                    | IV            | Home, Hospital               |
| Inghelbrecht et al.               | Survey            | 2010 | Belgium                                | IV            | Not specified                |
| Lossignol et al.                  | Cohort study      | 2011 | Belgium                                | IV            | Hospital                     |
| Matzo & Emanuel                   | Survey            | 1997 | USA                                    | Not specified | Not specified                |
| Meier et al.                      | Survey            | 2003 | USA                                    | Not specified | Home                         |
| Naafs                             | Review            | 2001 | Netherlands                            | Not specified | Not specified                |
| O'Brien et al.                    | Review            | 2000 | USA                                    | Not specified | Not specified                |
| Onwuteaka-Philipsen et al.        | Survey            | 1997 | Netherlands                            | IV            | Not specified                |
| Onwuteaka-Philipsen et al.        | Survey            | 1997 | Netherlands                            | Not specified | Not specified                |
| Onwuteaka-Philipsen et al.        | Survey            | 1995 | Netherlands                            | Not specified | Not specified                |
| Onwuteaka-Philipsen & van der Wal | Cohort study      | 1998 | Netherlands                            | Not specified | Home, Hospital, Nursing Home |
| Rurup et al.                      | Cohort study      | 2012 | Multi-region (Belgium and Netherlands) | Not specified | Home, Hospital               |
| Spencer                           | Review            | 1995 | USA                                    | Not specified | Not specified                |
| Swarte & Heintz                   | Review            | 1999 | Netherlands                            | IV and Oral   | Not specified                |
| Swarte & Heintz                   | Review            | 2001 | Netherlands                            | IV and Oral   | Not specified                |
| van Bruchem-van de Scheur et al.  | Survey            | 2007 | Netherlands                            | Not specified | Not specified                |
| van de Scheur & van der Arend     | Qualitative study | 1998 | Netherlands                            | Not specified | Not specified                |
| Van Der Kloot Meijburg            | Review            | 1995 | Netherlands                            | Not specified | Not specified                |
| Van Der Maas et al.               | Survey            | 1996 | Netherlands                            | Not specified | Not specified                |

|                         |                    |      |                                             |               |                               |
|-------------------------|--------------------|------|---------------------------------------------|---------------|-------------------------------|
| Van Der Wal et al       | Survey             | 1992 | Netherlands                                 | IV and Oral   | Not specified                 |
| Varadarajan et al.      | Review             | 2016 | Multi-region (Europe and USA)               | IV and Oral   | Not specified                 |
| Willems et al.          | Review             | 1999 | Netherlands                                 | IV and Oral   | Not specified                 |
| Bollen et al.           | Practical Manual   | 2016 | Netherlands                                 | IV            | Hospital                      |
| Bilsen et al.           | Survey             | 2005 | Belgium                                     | Not specified | Not specified                 |
| Blanke et al.           | Cohort study       | 2017 | USA                                         | IV            | Long-term care facility       |
| Boissinota et al.       | Review             | 2014 | Multi-region (European Union Member States) | IV and Oral   | Not specified                 |
| Bosshard                | Review             | 2012 | Switzerland                                 | IV and Oral   | Nursing home, Hospital        |
| Bosshard et al.         | Survey             | 2016 | Switzerland                                 | Not specified | Not specified                 |
| Campbell & Cox          | Review             | 2012 | USA                                         | Not specified | Not specified                 |
| Chambaere et al.        | Survey             | 2010 | Belgium                                     | IV and Oral   | Home, Hospital, Care home     |
| Cohen-Almagor & Hartman | Review             | 2001 | USA                                         | Not specified | Not specified                 |
| Crouch                  | Review             | 1996 | USA                                         | IV            | Not specified                 |
| Dunn et al.             | Guideline          | 2008 | USA                                         | Not specified | Not specified                 |
| Emanuel et al.          | Survey             | 2000 | USA                                         | Not specified | Not specified                 |
| Emanuel                 | Survey             | 2000 | USA                                         | Not specified | Not specified                 |
| Engler                  | Review             | 2007 | Belgium                                     | IV and Oral   | Home, Hospital, Nursing Homes |
| Evrard                  | Position statement | 2013 | Belgium                                     | Not specified | Home, Hospital                |
| Finlay & van Dijk       | Survey             | 2002 | Netherlands                                 | IV and Oral   | Not specified                 |
| Fischer et al.          | Survey             | 2007 | Switzerland                                 | Oral          | NGO facility, Hospital        |
| Wachter                 | Review             | 1989 | Netherlands                                 | Not specified | Not specified                 |

|                                  |                       |      |                                     |               |                                                           |
|----------------------------------|-----------------------|------|-------------------------------------|---------------|-----------------------------------------------------------|
| Hiscox                           | Review                | 2007 | USA                                 | Not specified | Not specified                                             |
| Horikx et al.                    | Survey                | 2000 | Netherlands                         | IV and Oral   | Not specified                                             |
| Inghelbrecht et al.              | Cross-sectional study | 2008 | Belgium                             | Not specified | Home, Hospital, Nursing Homes                             |
| Jamison                          | Review                | 1996 | USA                                 | Not specified | Not specified                                             |
| Kimsma, 1996                     | Review                | 1996 | Netherlands                         | IV and Oral   | Not specified                                             |
| Kompanje et al.                  | Case Report           | 2007 | Netherlands                         | IV            | Hospital (ICU)                                            |
| Lalmohamed & Horikx              | Cross-sectional study | 2010 | Netherlands                         | IV and Oral   | Home, hospital, hospice, nursing home                     |
| Lau et al.                       | Survey                | 2000 | Netherlands                         | IV            | Not specified                                             |
| Lemiengre et al.                 | Qualitative study     | 2008 | Belgium                             | Not specified | Hospitals                                                 |
| Lossignol                        | Review                | 2008 | Belgium                             | IV and Oral   | Not specified                                             |
| Oregon Nurses Association,       | Guideline             | 2001 | USA                                 | IV            | Not specified                                             |
| Pasman et al.                    | Cross-sectional study | 2009 | Netherlands                         | IV            | Hospitals, nursing homes, hospices                        |
| Pennec et al.                    | Survey                | 2015 | France                              | IV            | Home                                                      |
| Rietjens et al.                  | Qualitative Study     | 2006 | Netherlands                         | IV            | Home, Hospital, Nursing Homes                             |
| Rietjens et al.                  | Review                | 2009 | Netherlands                         | IV            | Not specified                                             |
| Schildmann et al.                | Survey                | 2010 | Germany                             | Not specified | Not specified                                             |
| Smets et al.                     | Review                | 2009 | Multi-region (Netherlands, Belgium) | Not specified | Not specified                                             |
| Smets et al.                     | Cohort study          | 2010 | Belgium                             | IV and Oral   | Hospital (51.7% of cases), Home (42.2%), Care home (4.3%) |
| Smets et al.                     | Cross-sectional study | 2010 | Belgium                             | IV and Oral   | Home, hospital, or care home                              |
| Smets et al.                     | Qualitative           | 2010 | Belgium                             | IV and Oral   | Home                                                      |
| Sprij                            | Review                | 2010 | Netherlands                         | IV            | Not specified                                             |
| Thienpont et al.                 | Cohort study          | 2015 | Belgium                             | IV            | Home, Hospital                                            |
| van Bruchem-van de Scheur et al. | Survey                | 2008 | Netherlands                         | Not specified | Hospital                                                  |

|                                  |                       |      |                                 |               |                                                                                                  |
|----------------------------------|-----------------------|------|---------------------------------|---------------|--------------------------------------------------------------------------------------------------|
| van Bruchem-van de Scheur et al. | Survey                | 2008 | Netherlands                     | Not specified | Home, Hospital, Nursing Homes                                                                    |
| van der Heide et al.             | Survey                | 2007 | Netherlands                     | Not specified | Not specified                                                                                    |
| van der Heide et al.             | Cross-sectional study | 2007 | Netherlands                     | IV and Oral   | Not specified                                                                                    |
| van Heest et al.                 | Cross-sectional study | 2009 | Netherlands                     | IV            | Home                                                                                             |
| van Marwijk et al.               | Qualitative study     | 2007 | Netherlands                     | Not specified | Not specified                                                                                    |
| Wineberg                         | Cohort study          | 2000 | USA                             | Oral          | Not specified                                                                                    |
| Ziegler & Bosshard               | Review                | 2007 | Multi-region (Switzerland, USA) | IV            | Oregon - Home, Nursing home<br>Switzerland - Home, nursing home or in some cases premises of NGO |
| Health PEI                       | Protocol              | 2016 | Canada                          | IV            | Not specified                                                                                    |
| Author Unknown                   | Protocol              | 2012 | Netherlands                     | IV and Oral   | Not specified                                                                                    |
| Author Unknown                   | Review                | 2005 | Belgium                         | IV            | At home in 41% of cases.                                                                         |
| Author Unknown                   | Protocol              | 2016 | Canada                          | IV            | Hospital                                                                                         |
| Author Unknown                   | Protocol              | 2017 | Canada                          | IV            | Not specified                                                                                    |
| Author Unknown                   | Protocol              | 2016 | Canada                          | IV            | Hospital                                                                                         |
| Author Unknown                   | Protocol              | 2017 | Canada                          | IV            | Not specified                                                                                    |
| Author Unknown                   | Protocol              | 2016 | Canada                          | IV            | Not specified                                                                                    |
| Author Unknown                   | Protocol              | 2016 | Canada                          | IV            | Not specified                                                                                    |
| Author Unknown                   | Protocol              | 2017 | Canada                          | IV and Oral   | Not specified                                                                                    |
| Author Unknown                   | Protocol              | 2016 | Canada                          | IV            | Not specified                                                                                    |

|                    |                       |      |                                                                       |               |                                                                                     |
|--------------------|-----------------------|------|-----------------------------------------------------------------------|---------------|-------------------------------------------------------------------------------------|
| Author Unknown     | Protocol              | 2016 | Canada                                                                | IV            | Not specified                                                                       |
| Author Unknown     | Protocol              | 2018 | Canada                                                                | IV and Oral   | Not specified                                                                       |
| Author Unknown     | Protocol              | 2018 | Canada                                                                | IV and Oral   | Not specified                                                                       |
| Author Unknown     | Protocol              | 2017 | Canada                                                                | IV            | Location is to be determined through discussion with patient and family/caregivers. |
| Author Unknown     | Protocol              | 2018 | Canada                                                                | IV            | Not specified                                                                       |
| Author Unknown     | Protocol              | 2017 | Canada                                                                | IV            | Not specified                                                                       |
| Author Unknown     | Protocol              | 2016 | Canada                                                                | IV            | Not specified                                                                       |
| Borgsteede et al.  | Survey                | 2011 | Netherlands                                                           | Not specified | Not specified                                                                       |
| Bosshard et al.    | Review                | 2008 | Multi-region (Belgium, Netherlands, Switzerland, Germany, Norway, UK) | Not specified | Not specified                                                                       |
| Burkhardt et al.   | Review                | 2014 | Switzerland                                                           | Oral          | Home, medico-social institution                                                     |
| Campbell & Black   | Cross-sectional study | 2014 | USA                                                                   | Not specified | Hospice                                                                             |
| de Casterle et al. | Qualitative study     | 2006 | Belgium                                                               |               | Not specified                                                                       |
| Dees et al.        | Qualitative study     | 2013 | Netherlands                                                           | Not specified | Not specified                                                                       |
| Dierickx et al.    | Cross-sectional study | 2016 | Belgium                                                               | Not specified | Home, hospital                                                                      |
| Francke et al.     | Survey                | 2015 | Netherlands                                                           | Not specified | Not specified                                                                       |
| Fass & Fass        | Review                | 2011 | USA                                                                   | Oral          | Home                                                                                |
| Grube              | Protocol              | 2014 | USA                                                                   | Oral          | Not specified                                                                       |

|                                       |                              |      |                                    |               |                                                                               |
|---------------------------------------|------------------------------|------|------------------------------------|---------------|-------------------------------------------------------------------------------|
| Hedberg et al.                        | Cohort study                 | 2009 | USA                                | Oral          | Home                                                                          |
| Hesselink et al.                      | Review                       | 2012 | Netherlands                        | Not specified | Hospitals, Nursing Homes                                                      |
| Hicks                                 | Review                       | 2006 | Multi-region                       | Not specified | Not specified                                                                 |
| Lemiengre                             | Qualitative study            | 2008 | Belgium                            | Not specified | Nursing home                                                                  |
| Author Unknown                        | Protocol                     | 2015 | Columbia                           | IV            | Not specified                                                                 |
| Ogden                                 | Case Report                  | 2010 | Switzerland                        | Oral          | At the headquarters of Dignitas, a right-to-die organisation                  |
| Onwuteaka-Phillipsen et al.           | Cross-sectional study        | 2012 | Netherlands                        | Not specified | Mostly undertaken in general practice rather than hospitals or nursing homes. |
| Smets et al.                          | Cross-sectional study        | 2010 | Belgium                            | Not specified | Not specified                                                                 |
| Sullivan et al.                       | Cohort study                 | 2000 | USA                                | IV            | Not specified                                                                 |
| Wang et al.                           | Cohort study                 | 2015 | USA                                | Oral          | Home                                                                          |
| Washington State Department of Health | Protocol                     | 2015 | USA                                | Oral          | For 2015: home 86%; Long Term Care 10%; other 1% unknown 3%.                  |
| Weiss et al.                          | Clinical practice handbook   | 2018 | Canada                             | IV            | Not specified                                                                 |
| Ysebaert et al.                       | Cohort study                 | 2015 | Belgium                            | Not specified | Hospital                                                                      |
| Emanuel et al.                        | Systematic Review            | 2016 | Multi-region (USA, Canada, Europe) | Not specified | Not specified                                                                 |
| Rabadi et al.                         | Cohort study (retrospective) | 2019 | USA                                | Not specified | Home, Hospice                                                                 |
| Ball et al.                           | Descriptive Study            | 2019 | Canada                             | IV            | Home, Hospital, Nursing Home                                                  |
| Beardsley et al.                      | Descriptive Study            | 2018 | Australia                          | Oral          | Not specified                                                                 |



|                   |                              |      |              |               |                                                     |
|-------------------|------------------------------|------|--------------|---------------|-----------------------------------------------------|
| Blanke et al.     | Cohort study (retrospective) | 2018 | USA          | Not specified | Not specified                                       |
| Buchbinder et al. | Qualitative study            | 2018 | USA          | Not specified | Home                                                |
| Dierickx et al.   | Cohort study (retrospective) | 2018 | Belgium      | IV            | Home, hospital, care home                           |
| Dierickx et al.   | Cohort study (retrospective) | 2018 | Belgium      | Not specified | Home, Nursing home, hospital                        |
| Hales et al.      | Mixed methods study          | 2019 | Canada       | Not specified | Not specified                                       |
| Harty et al.      | Review                       | 2019 | Multi-region | Oral          | Not specified                                       |
| Hedberg & New     | Cohort study (retrospective) | 2017 | USA          | Not specified | Not specified                                       |
| Hughes            | Commentary                   | 2017 | USA          | Oral          | Not specified                                       |
| Hurst et al.      | Cohort study (retrospective) | 2018 | Switzerland  | Not specified | Home, Hospital                                      |
| Li et al.         | Report                       | 2017 | Canada       | Not specified | Hospital                                            |
| Riley et al.      | Qualitative study            | 2019 | Netherlands  | IV and Oral   | Home, Hospital, Nursing Home                        |
| Silvius et al.    | Policy Analysis              | 2019 | Canada       | Not specified | Hospital, home, nursing home, long term care centre |
| Wang              | Case Report                  | 2018 | USA          | Not specified | Home                                                |
